# Supplementary material for: Dilated cardiomyopathy-associated RNA Binding Motif Protein 20 regulates long pre-mRNAs in neurons
Source: bioRxiv preprint, doi:10.1101/2023.12.06.570345, version 3 (2025-01-20)
Supplement: Supplementary Table 1 [file 570345_file14.xlsx]

## Sheet: Annotated_ECLIP_HR_ClipperPeaks
seqnames	start	end	width	strand	score	log10pvalue	local_IDR	global_IDR	annot.symbol	annot.type	annotation.boundary
chr13	11624790	11624869	80	-	1000	400	5	5	Ryr2	introns	No_boundary
chr13	11625938	11625949	12	-	1000	400	5	5	Ryr2	introns	No_boundary
chr13	11626205	11626222	18	-	1000	400	5	5	Ryr2	introns	No_boundary
chr13	11626672	11626721	50	-	1000	400	5	5	Ryr2	introns	No_boundary
chr13	11626722	11626735	14	-	1000	400	5	5	Ryr2	introns	No_boundary
chr13	101682209	101682294	86	-	1000	400	5	5	Pik3r1	3UTRs	No_boundary
chr14	54974261	54974335	75	+	1000	400	5	5	Mhrt	exons	Exon_intron_boundary
chr14	34571785	34571881	97	-	1000	400	5	5	Ldb3	cds	Exon_intron_boundary
chr14	34572099	34572156	58	-	1000	400	5	5	Ldb3	introns	No_boundary
chr14	34572157	34572171	15	-	1000	400	5	5	Ldb3	introns	No_boundary
chr14	34572172	34572183	12	-	1000	400	5	5	Ldb3	introns	No_boundary
chr14	34572184	34572191	8	-	1000	400	5	5	Ldb3	introns	No_boundary
chr14	34572192	34572224	33	-	1000	400	5	5	Ldb3	introns	No_boundary
chr14	34572729	34572832	104	-	1000	400	5	5	Ldb3	introns	No_boundary
chr14	34572833	34572969	137	-	1000	400	5	5	Ldb3	introns	No_boundary
chr14	34572970	34573241	272	-	1000	400	5	5	Ldb3	cds	Exon_intron_boundary
chr14	54958044	54958136	93	-	1000	400	5	5	Myh6	introns	No_boundary
chr19	5796113	5796122	10	-	1000	400	5	5	NA	introns	No_boundary
chr19	5797038	5797074	37	-	1000	400	5	5	Malat1	exons	No_boundary
chr19	5797075	5797111	37	-	1000	400	5	5	Malat1	exons	No_boundary
chr19	5797171	5797178	8	-	1000	400	5	5	Malat1	exons	No_boundary
chr19	5797179	5797203	25	-	1000	400	5	5	Malat1	exons	No_boundary
chr19	5797204	5797215	12	-	1000	400	5	5	Malat1	exons	No_boundary
chr19	5797216	5797234	19	-	1000	400	5	5	Malat1	exons	No_boundary
chr19	5797235	5797307	73	-	1000	400	5	5	Malat1	exons	No_boundary
chr19	5797308	5797325	18	-	1000	400	5	5	Malat1	exons	No_boundary
chr19	5797351	5797362	12	-	1000	400	5	5	Malat1	exons	No_boundary
chr19	5797363	5797383	21	-	1000	400	5	5	Malat1	exons	No_boundary
chr19	5797388	5797396	9	-	1000	400	5	5	Malat1	exons	No_boundary
chr19	5797397	5797457	61	-	1000	400	5	5	Malat1	exons	No_boundary
chr19	5797458	5797466	9	-	1000	400	5	5	Malat1	exons	No_boundary
chr19	5797467	5797472	6	-	1000	400	5	5	Malat1	exons	No_boundary
chr19	5797473	5797498	26	-	1000	400	5	5	Malat1	exons	No_boundary
chr19	5797499	5797517	19	-	1000	400	5	5	Malat1	exons	No_boundary
chr19	5797518	5797529	12	-	1000	400	5	5	Malat1	exons	No_boundary
chr19	5797530	5797543	14	-	1000	400	5	5	Malat1	exons	No_boundary
chr19	5797544	5797549	6	-	1000	400	5	5	Malat1	exons	No_boundary
chr19	5797550	5797565	16	-	1000	400	5	5	Malat1	exons	No_boundary
chr19	5797566	5797600	35	-	1000	400	5	5	Malat1	exons	No_boundary
chr19	5797675	5797690	16	-	1000	400	5	5	Malat1	exons	No_boundary
chr19	5797691	5797754	64	-	1000	400	5	5	Malat1	exons	No_boundary
chr19	5797915	5798001	87	-	1000	400	5	5	Malat1	exons	No_boundary
chr19	5798016	5798025	10	-	1000	400	5	5	Malat1	exons	No_boundary
chr19	5798236	5798260	25	-	1000	400	5	5	Malat1	exons	No_boundary
chr19	5798263	5798356	94	-	1000	400	5	5	Malat1	exons	No_boundary
chr19	5798694	5798700	7	-	1000	400	5	5	Malat1	exons	No_boundary
chr19	5798701	5798735	35	-	1000	400	5	5	Malat1	exons	No_boundary
chr19	5799303	5799319	17	-	1000	400	5	5	Malat1	exons	No_boundary
chr19	5799622	5799645	24	-	1000	400	5	5	Malat1	exons	No_boundary
chr19	5799646	5799693	48	-	1000	400	5	5	Malat1	exons	No_boundary
chr19	5799694	5799720	27	-	1000	400	5	5	Malat1	exons	No_boundary
chr19	5799721	5799785	65	-	1000	400	5	5	Malat1	exons	No_boundary
chr19	5799786	5799856	71	-	1000	400	5	5	Malat1	exons	No_boundary
chr19	5799921	5799936	16	-	1000	400	5	5	Malat1	exons	No_boundary
chr19	5799937	5800022	86	-	1000	400	5	5	Malat1	exons	No_boundary
chr19	5800200	5800249	50	-	1000	400	5	5	Malat1	exons	No_boundary
chr19	5800250	5800258	9	-	1000	400	5	5	Malat1	exons	No_boundary
chr19	5800259	5800310	52	-	1000	400	5	5	Malat1	exons	No_boundary
chr19	5800410	5800492	83	-	1000	400	5	5	Malat1	exons	No_boundary
chr19	5800512	5800524	13	-	1000	400	5	5	Malat1	exons	No_boundary
chr19	5800529	5800543	15	-	1000	400	5	5	Malat1	exons	No_boundary
chr19	5800544	5800552	9	-	1000	400	5	5	Malat1	exons	No_boundary
chr19	5800553	5800566	14	-	1000	400	5	5	Malat1	exons	No_boundary
chr19	5800567	5800600	34	-	1000	400	5	5	Malat1	exons	No_boundary
chr19	5800601	5800616	16	-	1000	400	5	5	Malat1	exons	No_boundary
chr19	5800782	5800787	6	-	1000	400	5	5	Malat1	exons	No_boundary
chr19	5800788	5800812	25	-	1000	400	5	5	Malat1	exons	No_boundary
chr19	5800813	5800929	117	-	1000	400	5	5	Malat1	exons	No_boundary
chr19	5838563	5838657	95	-	1000	400	5	5	Neat1	exons	No_boundary
chr19	5843234	5843422	189	-	1000	400	5	5	Neat1	exons	No_boundary
chr19	5843792	5843870	79	-	1000	400	5	5	Neat1	exons	No_boundary
chr19	5844934	5845064	131	-	1000	400	5	5	NA	introns	Exon_intron_boundary
chr19	5845065	5845072	8	-	1000	400	5	5	NA	introns	Exon_intron_boundary
chr19	5845269	5845280	12	-	1000	400	5	5	Neat1	exons	No_boundary
chr19	5845281	5845302	22	-	1000	400	5	5	Neat1	exons	Intron_exon_boundary
chr19	5845303	5845328	26	-	1000	400	5	5	Neat1	exons	Intron_exon_boundary
chr19	5845329	5845370	42	-	1000	400	5	5	Neat1	exons	Intron_exon_boundary
chr19	5845371	5845377	7	-	1000	400	5	5	Neat1	exons	Intron_exon_boundary
chr2	76821638	76821703	66	-	1000	400	5	5	Ttn	introns	No_boundary
chr2	76821988	76822064	77	-	1000	400	5	5	Ttn	introns	No_boundary
chr2	76822531	76822547	17	-	1000	400	5	5	Ttn	cds	Exon_intron_boundary
chr2	76822548	76822566	19	-	1000	400	5	5	Ttn	cds	Exon_intron_boundary
chr2	76822888	76822911	24	-	1000	400	5	5	Ttn	cds	Exon_intron_boundary
chr2	76822916	76822980	65	-	1000	400	5	5	Ttn	cds	Exon_intron_boundary
chr2	76822981	76823060	80	-	1000	400	5	5	Ttn	introns	No_boundary
chr2	76823194	76823237	44	-	1000	400	5	5	Ttn	introns	No_boundary
chr2	76823308	76823372	65	-	1000	400	5	5	Ttn	introns	No_boundary
chr2	76824014	76824071	58	-	1000	400	5	5	Ttn	introns	No_boundary
chr2	76824072	76824078	7	-	1000	400	5	5	Ttn	introns	No_boundary
chr2	76824079	76824135	57	-	1000	400	5	5	Ttn	introns	No_boundary
chr2	76824326	76824433	108	-	1000	400	5	5	Ttn	introns	No_boundary
chr2	76824490	76824532	43	-	1000	400	5	5	Ttn	introns	No_boundary
chr2	76824533	76824563	31	-	1000	400	5	5	Ttn	introns	No_boundary
chr2	76824564	76824575	12	-	1000	400	5	5	Ttn	introns	No_boundary
chr2	76824576	76824700	125	-	1000	400	5	5	Ttn	introns	No_boundary
chr2	76824756	76824782	27	-	1000	400	5	5	Ttn	introns	No_boundary
chr2	76824789	76824817	29	-	1000	400	5	5	Ttn	introns	No_boundary
chr2	76824818	76824845	28	-	1000	400	5	5	Ttn	introns	No_boundary
chr2	76824846	76824918	73	-	1000	400	5	5	Ttn	introns	No_boundary
chr2	76824959	76824980	22	-	1000	400	5	5	Ttn	introns	No_boundary
chr2	76824981	76824996	16	-	1000	400	5	5	Ttn	introns	No_boundary
chr2	76824997	76825006	10	-	1000	400	5	5	Ttn	introns	No_boundary
chr2	76825007	76825065	59	-	1000	400	5	5	Ttn	introns	No_boundary
chr2	76825537	76825554	18	-	1000	400	5	5	Ttn	cds	Exon_intron_boundary
chr2	76825555	76825570	16	-	1000	400	5	5	Ttn	cds	Exon_intron_boundary
chr2	76825571	76825639	69	-	1000	400	5	5	Ttn	cds	Exon_intron_boundary
chr2	76825763	76825800	38	-	1000	400	5	5	Ttn	introns	No_boundary
chr2	76825809	76825816	8	-	1000	400	5	5	Ttn	cds	Exon_intron_boundary
chr2	76825817	76825822	6	-	1000	400	5	5	Ttn	cds	Exon_intron_boundary
chr2	76825823	76825902	80	-	1000	400	5	5	Ttn	cds	Exon_intron_boundary
chr2	76825903	76825985	83	-	1000	400	5	5	Ttn	introns	No_boundary
chr2	76826142	76826153	12	-	1000	400	5	5	Ttn	cds	Exon_intron_boundary
chr2	76826330	76826433	104	-	1000	400	5	5	Ttn	introns	No_boundary
chr2	76826434	76826478	45	-	1000	400	5	5	Ttn	cds	Exon_intron_boundary
chr2	76826479	76826491	13	-	1000	400	5	5	Ttn	cds	Exon_intron_boundary
chr2	76826492	76826506	15	-	1000	400	5	5	Ttn	cds	Exon_intron_boundary
chr2	76826799	76826865	67	-	1000	400	5	5	Ttn	introns	No_boundary
chr2	76827019	76827031	13	-	1000	400	5	5	Ttn	cds	Exon_intron_boundary
chr2	76827060	76827080	21	-	1000	400	5	5	Ttn	cds	Exon_intron_boundary
chr2	76827361	76827421	61	-	1000	400	5	5	Ttn	introns	No_boundary
chr2	76827422	76827442	21	-	1000	400	5	5	Ttn	introns	No_boundary
chr2	76827443	76827455	13	-	1000	400	5	5	Ttn	introns	No_boundary
chr2	76827456	76827469	14	-	1000	400	5	5	Ttn	introns	No_boundary
chr2	76827473	76827500	28	-	1000	400	5	5	Ttn	cds	Exon_intron_boundary
chr2	76827501	76827526	26	-	1000	400	5	5	Ttn	cds	Exon_intron_boundary
chr2	76827527	76827541	15	-	1000	400	5	5	Ttn	cds	Exon_intron_boundary
chr2	76827542	76827554	13	-	1000	400	5	5	Ttn	cds	Exon_intron_boundary
chr2	76827555	76827561	7	-	1000	400	5	5	Ttn	cds	Exon_intron_boundary
chr2	76827562	76827585	24	-	1000	400	5	5	Ttn	introns	No_boundary
chr2	76827586	76827595	10	-	1000	400	5	5	Ttn	introns	No_boundary
chr2	76827596	76827688	93	-	1000	400	5	5	Ttn	introns	No_boundary
chr2	76827710	76827731	22	-	1000	400	5	5	Ttn	cds	Exon_intron_boundary
chr2	76827732	76827768	37	-	1000	400	5	5	Ttn	cds	Exon_intron_boundary
chr2	76827769	76827830	62	-	1000	400	5	5	Ttn	introns	No_boundary
chr2	76827844	76827854	11	-	1000	400	5	5	Ttn	introns	No_boundary
chr2	76827855	76827936	82	-	1000	400	5	5	Ttn	cds	Exon_intron_boundary
chr2	76827937	76827991	55	-	1000	400	5	5	Ttn	cds	Exon_intron_boundary
chr2	76827992	76828087	96	-	1000	400	5	5	Ttn	introns	No_boundary
chr2	76828088	76828113	26	-	1000	400	5	5	Ttn	cds	Exon_intron_boundary
chr2	76828114	76828128	15	-	1000	400	5	5	Ttn	cds	Exon_intron_boundary
chr2	76828129	76828164	36	-	1000	400	5	5	Ttn	cds	Exon_intron_boundary
chr2	76828165	76828180	16	-	1000	400	5	5	Ttn	cds	Exon_intron_boundary
chr2	76828181	76828188	8	-	1000	400	5	5	Ttn	cds	Exon_intron_boundary
chr2	76828189	76828220	32	-	1000	400	5	5	Ttn	introns	No_boundary
chr2	76828221	76828272	52	-	1000	400	5	5	Ttn	introns	No_boundary
chr2	76828297	76828336	40	-	1000	400	5	5	Ttn	cds	Exon_intron_boundary
chr2	76828337	76828341	5	-	1000	400	5	5	Ttn	cds	Exon_intron_boundary
chr2	76828342	76828443	102	-	1000	400	5	5	Ttn	cds	Exon_intron_boundary
chr2	76828581	76828668	88	-	1000	400	5	5	Ttn	introns	No_boundary
chr2	76829397	76829441	45	-	1000	400	5	5	Ttn	introns	No_boundary
chr2	76829442	76829485	44	-	1000	400	5	5	Ttn	introns	No_boundary
chr2	76829576	76829676	101	-	1000	400	5	5	Ttn	cds	Exon_intron_boundary
chr2	76829717	76829746	30	-	1000	400	5	5	Ttn	cds	Exon_intron_boundary
chr2	76829747	76829801	55	-	1000	400	5	5	Ttn	introns	No_boundary
chr2	76829826	76829861	36	-	1000	400	5	5	Ttn	cds	Exon_intron_boundary
chr2	76829862	76829867	6	-	1000	400	5	5	Ttn	cds	Exon_intron_boundary
chr2	76829868	76829910	43	-	1000	400	5	5	Ttn	cds	Exon_intron_boundary
chr2	76829911	76829916	6	-	1000	400	5	5	Ttn	introns	No_boundary
chr2	76829917	76829964	48	-	1000	400	5	5	Ttn	introns	No_boundary
chr2	76829965	76829997	33	-	1000	400	5	5	Ttn	introns	No_boundary
chr2	76829998	76830004	7	-	1000	400	5	5	Ttn	introns	No_boundary
chr2	76830005	76830013	9	-	1000	400	5	5	Ttn	introns	No_boundary
chr2	76830014	76830025	12	-	1000	400	5	5	Ttn	introns	No_boundary
chr2	76830026	76830042	17	-	1000	400	5	5	Ttn	cds	Exon_intron_boundary
chr2	76830043	76830047	5	-	1000	400	5	5	Ttn	cds	Exon_intron_boundary
chr2	76830048	76830063	16	-	1000	400	5	5	Ttn	cds	Exon_intron_boundary
chr2	76830064	76830075	12	-	1000	400	5	5	Ttn	cds	Exon_intron_boundary
chr2	76830076	76830132	57	-	1000	400	5	5	Ttn	cds	Exon_intron_boundary
chr2	76830133	76830151	19	-	1000	400	5	5	Ttn	introns	No_boundary
chr2	76830152	76830163	12	-	1000	400	5	5	Ttn	introns	No_boundary
chr2	76830164	76830177	14	-	1000	400	5	5	Ttn	introns	No_boundary
chr2	76830178	76830224	47	-	1000	400	5	5	Ttn	cds	Exon_intron_boundary
chr2	76830225	76830233	9	-	1000	400	5	5	Ttn	cds	Exon_intron_boundary
chr2	76830234	76830238	5	-	1000	400	5	5	Ttn	cds	Exon_intron_boundary
chr2	76830241	76830265	25	-	1000	400	5	5	Ttn	cds	Exon_intron_boundary
chr2	76830266	76830289	24	-	1000	400	5	5	Ttn	cds	Exon_intron_boundary
chr2	76830290	76830368	79	-	1000	400	5	5	Ttn	cds	Exon_intron_boundary
chr2	76830369	76830381	13	-	1000	400	5	5	Ttn	introns	No_boundary
chr2	76830382	76830393	12	-	1000	400	5	5	Ttn	introns	No_boundary
chr2	76830394	76830409	16	-	1000	400	5	5	Ttn	introns	No_boundary
chr2	76830410	76830426	17	-	1000	400	5	5	Ttn	cds	Exon_intron_boundary
chr2	76830427	76830431	5	-	1000	400	5	5	Ttn	cds	Exon_intron_boundary
chr2	76830432	76830444	13	-	1000	400	5	5	Ttn	cds	Exon_intron_boundary
chr2	76830445	76830449	5	-	1000	400	5	5	Ttn	cds	Exon_intron_boundary
chr2	76830450	76830528	79	-	1000	400	5	5	Ttn	cds	Exon_intron_boundary
chr2	76830529	76830564	36	-	1000	400	5	5	Ttn	introns	No_boundary
chr2	76830565	76830585	21	-	1000	400	5	5	Ttn	introns	No_boundary
chr2	76830586	76830600	15	-	1000	400	5	5	Ttn	cds	Exon_intron_boundary
chr2	76830601	76830609	9	-	1000	400	5	5	Ttn	cds	Exon_intron_boundary
chr2	76830610	76830614	5	-	1000	400	5	5	Ttn	cds	Exon_intron_boundary
chr2	76830617	76830641	25	-	1000	400	5	5	Ttn	cds	Exon_intron_boundary
chr2	76830642	76830768	127	-	1000	400	5	5	Ttn	cds	Exon_intron_boundary
chr2	76830769	76830792	24	-	1000	400	5	5	Ttn	cds	Exon_intron_boundary
chr2	76830793	76830801	9	-	1000	400	5	5	Ttn	cds	Exon_intron_boundary
chr2	76830802	76830806	5	-	1000	400	5	5	Ttn	cds	Exon_intron_boundary
chr2	76830807	76830849	43	-	1000	400	5	5	Ttn	cds	Exon_intron_boundary
chr2	76830850	76830916	67	-	1000	400	5	5	Ttn	introns	No_boundary
chr2	76830917	76830921	5	-	1000	400	5	5	Ttn	introns	No_boundary
chr2	76830922	76830993	72	-	1000	400	5	5	Ttn	cds	Exon_intron_boundary
chr2	76830994	76830999	6	-	1000	400	5	5	Ttn	cds	Exon_intron_boundary
chr2	76831000	76831007	8	-	1000	400	5	5	Ttn	cds	Exon_intron_boundary
chr2	76831008	76831036	29	-	1000	400	5	5	Ttn	cds	Exon_intron_boundary
chr2	76831037	76831066	30	-	1000	400	5	5	Ttn	cds	Exon_intron_boundary
chr2	76831067	76831139	73	-	1000	400	5	5	Ttn	introns	No_boundary
chr2	76831140	76831184	45	-	1000	400	5	5	Ttn	cds	Exon_intron_boundary
chr2	76831185	76831189	5	-	1000	400	5	5	Ttn	cds	Exon_intron_boundary
chr2	76831190	76831205	16	-	1000	400	5	5	Ttn	cds	Exon_intron_boundary
chr2	76831206	76831273	68	-	1000	400	5	5	Ttn	cds	Exon_intron_boundary
chr2	76831274	76831295	22	-	1000	400	5	5	Ttn	introns	No_boundary
chr2	76831296	76831317	22	-	1000	400	5	5	Ttn	introns	No_boundary
chr2	76831318	76831330	13	-	1000	400	5	5	Ttn	introns	No_boundary
chr2	76831383	76831462	80	-	1000	400	5	5	Ttn	cds	Exon_intron_boundary
chr2	76831520	76831553	34	-	1000	400	5	5	Ttn	introns	No_boundary
chr2	76831554	76831573	20	-	1000	400	5	5	Ttn	introns	No_boundary
chr2	76831574	76831600	27	-	1000	400	5	5	Ttn	introns	No_boundary
chr2	76831601	76831625	25	-	1000	400	5	5	Ttn	introns	No_boundary
chr2	76831626	76831636	11	-	1000	400	5	5	Ttn	introns	No_boundary
chr2	76831637	76831644	8	-	1000	400	5	5	Ttn	introns	No_boundary
chr2	76831645	76831654	10	-	1000	400	5	5	Ttn	introns	No_boundary
chr2	76831655	76831727	73	-	1000	400	5	5	Ttn	introns	No_boundary
chr2	76831809	76831875	67	-	1000	400	5	5	Ttn	cds	Exon_intron_boundary
chr2	76831876	76831887	12	-	1000	400	5	5	Ttn	introns	No_boundary
chr2	76832089	76832115	27	-	1000	400	5	5	Ttn	cds	Exon_intron_boundary
chr2	76832116	76832123	8	-	1000	400	5	5	Ttn	cds	Exon_intron_boundary
chr2	76832124	76832163	40	-	1000	400	5	5	Ttn	cds	Exon_intron_boundary
chr2	76832164	76832187	24	-	1000	400	5	5	Ttn	cds	Exon_intron_boundary
chr2	76832188	76832225	38	-	1000	400	5	5	Ttn	introns	No_boundary
chr2	76832363	76832451	89	-	1000	400	5	5	Ttn	introns	No_boundary
chr2	76833058	76833170	113	-	1000	400	5	5	Ttn	cds	Exon_intron_boundary
chr2	76833171	76833194	24	-	1000	400	5	5	Ttn	introns	No_boundary
chr2	76833195	76833252	58	-	1000	400	5	5	Ttn	cds	Exon_intron_boundary
chr2	76833253	76833260	8	-	1000	400	5	5	Ttn	cds	Exon_intron_boundary
chr2	76833261	76833289	29	-	1000	400	5	5	Ttn	cds	Exon_intron_boundary
chr2	76833290	76833307	18	-	1000	400	5	5	Ttn	cds	Exon_intron_boundary
chr2	76833308	76833346	39	-	1000	400	5	5	Ttn	introns	No_boundary
chr2	76833347	76833368	22	-	1000	400	5	5	Ttn	introns	No_boundary
chr2	76833411	76833447	37	-	1000	400	5	5	Ttn	introns	No_boundary
chr2	76833448	76833453	6	-	1000	400	5	5	Ttn	introns	No_boundary
chr2	76833454	76833460	7	-	1000	400	5	5	Ttn	introns	No_boundary
chr2	76833461	76833467	7	-	1000	400	5	5	Ttn	introns	No_boundary
chr2	76833468	76833485	18	-	1000	400	5	5	Ttn	introns	No_boundary
chr2	76833490	76833498	9	-	1000	400	5	5	Ttn	introns	No_boundary
chr2	76833499	76833516	18	-	1000	400	5	5	Ttn	introns	No_boundary
chr2	76833517	76833606	90	-	1000	400	5	5	Ttn	introns	No_boundary
chr2	76833657	76833720	64	-	1000	400	5	5	Ttn	cds	Exon_intron_boundary
chr2	76833721	76833831	111	-	1000	400	5	5	Ttn	introns	No_boundary
chr2	76834071	76834107	37	-	1000	400	5	5	Ttn	introns	No_boundary
chr2	76834108	76834130	23	-	1000	400	5	5	Ttn	introns	No_boundary
chr2	76834131	76834163	33	-	1000	400	5	5	Ttn	introns	No_boundary
chr2	76834164	76834168	5	-	1000	400	5	5	Ttn	introns	No_boundary
chr2	76834169	76834173	5	-	1000	400	5	5	Ttn	introns	No_boundary
chr2	76834174	76834178	5	-	1000	400	5	5	Ttn	introns	No_boundary
chr2	76834179	76834189	11	-	1000	400	5	5	Ttn	introns	No_boundary
chr2	76834190	76834204	15	-	1000	400	5	5	Ttn	introns	No_boundary
chr2	76834205	76834214	10	-	1000	400	5	5	Ttn	introns	No_boundary
chr2	76834215	76834230	16	-	1000	400	5	5	Ttn	introns	No_boundary
chr2	76834231	76834244	14	-	1000	400	5	5	Ttn	introns	No_boundary
chr2	76834245	76834270	26	-	1000	400	5	5	Ttn	introns	No_boundary
chr2	76834271	76834278	8	-	1000	400	5	5	Ttn	introns	No_boundary
chr2	76834279	76834284	6	-	1000	400	5	5	Ttn	introns	No_boundary
chr2	76834285	76834292	8	-	1000	400	5	5	Ttn	introns	No_boundary
chr2	76834293	76834316	24	-	1000	400	5	5	Ttn	introns	No_boundary
chr2	76834317	76834329	13	-	1000	400	5	5	Ttn	introns	No_boundary
chr2	76834330	76834354	25	-	1000	400	5	5	Ttn	introns	No_boundary
chr2	76834355	76834378	24	-	1000	400	5	5	Ttn	introns	No_boundary
chr2	76834379	76834469	91	-	1000	400	5	5	Ttn	introns	No_boundary
chr2	76834470	76834501	32	-	1000	400	5	5	Ttn	introns	No_boundary
chr2	76834540	76834590	51	-	1000	400	5	5	Ttn	introns	No_boundary
chr2	76834591	76834603	13	-	1000	400	5	5	Ttn	introns	No_boundary
chr2	76834608	76834628	21	-	1000	400	5	5	Ttn	introns	No_boundary
chr2	76834629	76834650	22	-	1000	400	5	5	Ttn	introns	No_boundary
chr2	76834651	76834676	26	-	1000	400	5	5	Ttn	introns	No_boundary
chr2	76834677	76834752	76	-	1000	400	5	5	Ttn	introns	No_boundary
chr2	76834753	76834827	75	-	1000	400	5	5	Ttn	cds	Exon_intron_boundary
chr2	76834828	76834836	9	-	1000	400	5	5	Ttn	cds	Exon_intron_boundary
chr2	76834837	76834864	28	-	1000	400	5	5	Ttn	cds	Exon_intron_boundary
chr2	76834865	76834869	5	-	1000	400	5	5	Ttn	cds	Exon_intron_boundary
chr2	76834870	76834880	11	-	1000	400	5	5	Ttn	cds	Exon_intron_boundary
chr2	76834881	76834932	52	-	1000	400	5	5	Ttn	cds	Exon_intron_boundary
chr2	76834933	76834967	35	-	1000	400	5	5	Ttn	introns	No_boundary
chr2	76834968	76835010	43	-	1000	400	5	5	Ttn	introns	No_boundary
chr2	76835011	76835051	41	-	1000	400	5	5	Ttn	introns	No_boundary
chr2	76835056	76835122	67	-	1000	400	5	5	Ttn	introns	No_boundary
chr2	76835156	76835196	41	-	1000	400	5	5	Ttn	introns	No_boundary
chr2	76835197	76835231	35	-	1000	400	5	5	Ttn	introns	No_boundary
chr2	76835371	76835403	33	-	1000	400	5	5	Ttn	introns	No_boundary
chr2	76835404	76835415	12	-	1000	400	5	5	Ttn	introns	No_boundary
chr2	76835416	76835424	9	-	1000	400	5	5	Ttn	introns	No_boundary
chr2	76835425	76835447	23	-	1000	400	5	5	Ttn	introns	No_boundary
chr2	76835448	76835480	33	-	1000	400	5	5	Ttn	introns	No_boundary
chr2	76835481	76835486	6	-	1000	400	5	5	Ttn	introns	No_boundary
chr2	76835487	76835496	10	-	1000	400	5	5	Ttn	introns	No_boundary
chr2	76835497	76835531	35	-	1000	400	5	5	Ttn	introns	No_boundary
chr2	76835532	76835540	9	-	1000	400	5	5	Ttn	introns	No_boundary
chr2	76835541	76835551	11	-	1000	400	5	5	Ttn	introns	No_boundary
chr2	76835794	76835801	8	-	1000	400	5	5	Ttn	introns	No_boundary
chr2	76835802	76835824	23	-	1000	400	5	5	Ttn	introns	No_boundary
chr2	76835825	76835900	76	-	1000	400	5	5	Ttn	introns	No_boundary
chr2	76835901	76835922	22	-	1000	400	5	5	Ttn	introns	No_boundary
chr2	76835923	76835959	37	-	1000	400	5	5	Ttn	cds	Exon_intron_boundary
chr2	76835960	76835981	22	-	1000	400	5	5	Ttn	cds	Exon_intron_boundary
chr2	76835982	76836039	58	-	1000	400	5	5	Ttn	cds	Exon_intron_boundary
chr2	76836064	76836109	46	-	1000	400	5	5	Ttn	introns	No_boundary
chr2	76836110	76836151	42	-	1000	400	5	5	Ttn	introns	No_boundary
chr2	76836152	76836161	10	-	1000	400	5	5	Ttn	introns	No_boundary
chr2	76836162	76836183	22	-	1000	400	5	5	Ttn	introns	No_boundary
chr2	76836184	76836194	11	-	1000	400	5	5	Ttn	introns	No_boundary
chr2	76836195	76836200	6	-	1000	400	5	5	Ttn	introns	No_boundary
chr2	76836201	76836245	45	-	1000	400	5	5	Ttn	introns	No_boundary
chr2	76836246	76836276	31	-	1000	400	5	5	Ttn	introns	No_boundary
chr2	76836277	76836297	21	-	1000	400	5	5	Ttn	introns	No_boundary
chr2	76836382	76836388	7	-	1000	400	5	5	Ttn	cds	Exon_intron_boundary
chr2	76836389	76836420	32	-	1000	400	5	5	Ttn	cds	Exon_intron_boundary
chr2	76836421	76836513	93	-	1000	400	5	5	Ttn	introns	No_boundary
chr2	76836514	76836571	58	-	1000	400	5	5	Ttn	cds	Exon_intron_boundary
chr2	76836572	76836629	58	-	1000	400	5	5	Ttn	cds	Exon_intron_boundary
chr2	76836630	76836643	14	-	1000	400	5	5	Ttn	introns	No_boundary
chr2	76836648	76836700	53	-	1000	400	5	5	Ttn	introns	No_boundary
chr2	76836701	76836734	34	-	1000	400	5	5	Ttn	introns	No_boundary
chr2	76836735	76836750	16	-	1000	400	5	5	Ttn	cds	Exon_intron_boundary
chr2	76836751	76836757	7	-	1000	400	5	5	Ttn	cds	Exon_intron_boundary
chr2	76836758	76836790	33	-	1000	400	5	5	Ttn	cds	Exon_intron_boundary
chr2	76836791	76836796	6	-	1000	400	5	5	Ttn	cds	Exon_intron_boundary
chr2	76836797	76836819	23	-	1000	400	5	5	Ttn	cds	Exon_intron_boundary
chr2	76836820	76836828	9	-	1000	400	5	5	Ttn	introns	No_boundary
chr2	76836833	76836849	17	-	1000	400	5	5	Ttn	introns	No_boundary
chr2	76836850	76836860	11	-	1000	400	5	5	Ttn	introns	No_boundary
chr2	76836861	76836868	8	-	1000	400	5	5	Ttn	introns	No_boundary
chr2	76836869	76836921	53	-	1000	400	5	5	Ttn	introns	No_boundary
chr2	76836922	76836938	17	-	1000	400	5	5	Ttn	introns	No_boundary
chr2	76837063	76837149	87	-	1000	400	5	5	Ttn	introns	No_boundary
chr2	76837298	76837371	74	-	1000	400	5	5	Ttn	introns	No_boundary
chr2	76837805	76837846	42	-	1000	400	5	5	Ttn	introns	No_boundary
chr2	76837847	76837865	19	-	1000	400	5	5	Ttn	introns	No_boundary
chr2	76838217	76838346	130	-	1000	400	5	5	Ttn	introns	No_boundary
chr2	76838399	76838460	62	-	1000	400	5	5	Ttn	introns	No_boundary
chr2	76838461	76838489	29	-	1000	400	5	5	Ttn	introns	No_boundary
chr2	76838490	76838495	6	-	1000	400	5	5	Ttn	introns	No_boundary
chr2	76838496	76838556	61	-	1000	400	5	5	Ttn	introns	No_boundary
chr2	76838557	76838584	28	-	1000	400	5	5	Ttn	cds	Exon_intron_boundary
chr2	76838589	76838605	17	-	1000	400	5	5	Ttn	cds	Exon_intron_boundary
chr2	76838606	76838646	41	-	1000	400	5	5	Ttn	cds	Exon_intron_boundary
chr2	76838647	76838655	9	-	1000	400	5	5	Ttn	introns	No_boundary
chr2	76838780	76838785	6	-	1000	400	5	5	Ttn	introns	No_boundary
chr2	76838786	76838848	63	-	1000	400	5	5	Ttn	cds	Exon_intron_boundary
chr2	76838849	76838857	9	-	1000	400	5	5	Ttn	cds	Exon_intron_boundary
chr2	76838858	76838866	9	-	1000	400	5	5	Ttn	cds	Exon_intron_boundary
chr2	76838867	76838878	12	-	1000	400	5	5	Ttn	cds	Exon_intron_boundary
chr2	76838879	76838897	19	-	1000	400	5	5	Ttn	cds	Exon_intron_boundary
chr2	76838898	76838948	51	-	1000	400	5	5	Ttn	introns	No_boundary
chr2	76839012	76839095	84	-	1000	400	5	5	Ttn	introns	No_boundary
chr2	76839096	76839154	59	-	1000	400	5	5	Ttn	introns	No_boundary
chr2	76839155	76839237	83	-	1000	400	5	5	Ttn	introns	No_boundary
chr2	76839238	76839256	19	-	1000	400	5	5	Ttn	introns	No_boundary
chr2	76839257	76839279	23	-	1000	400	5	5	Ttn	introns	No_boundary
chr2	76839280	76839406	127	-	1000	400	5	5	Ttn	introns	No_boundary
chr2	76839411	76839421	11	-	1000	400	5	5	Ttn	cds	Exon_intron_boundary
chr2	76839422	76839450	29	-	1000	400	5	5	Ttn	cds	Exon_intron_boundary
chr2	76839451	76839466	16	-	1000	400	5	5	Ttn	cds	Exon_intron_boundary
chr2	76839467	76839484	18	-	1000	400	5	5	Ttn	cds	Exon_intron_boundary
chr2	76839485	76839509	25	-	1000	400	5	5	Ttn	introns	No_boundary
chr2	76839514	76839522	9	-	1000	400	5	5	Ttn	introns	No_boundary
chr2	76839523	76839533	11	-	1000	400	5	5	Ttn	introns	No_boundary
chr2	76839534	76839575	42	-	1000	400	5	5	Ttn	introns	No_boundary
chr2	76839576	76839581	6	-	1000	400	5	5	Ttn	introns	No_boundary
chr2	76839582	76839623	42	-	1000	400	5	5	Ttn	introns	No_boundary
chr2	76839624	76839637	14	-	1000	400	5	5	Ttn	introns	No_boundary
chr2	76839638	76839715	78	-	1000	400	5	5	Ttn	introns	No_boundary
chr2	76840032	76840067	36	-	1000	400	5	5	Ttn	introns	No_boundary
chr2	76840068	76840239	172	-	1000	400	5	5	Ttn	cds	Exon_intron_boundary
chr2	76840240	76840276	37	-	1000	400	5	5	Ttn	cds	Exon_intron_boundary
chr2	76840277	76840335	59	-	1000	400	5	5	Ttn	cds	Exon_intron_boundary
chr2	76840336	76840379	44	-	1000	400	5	5	Ttn	introns	No_boundary
chr2	76840569	76840588	20	-	1000	400	5	5	Ttn	introns	No_boundary
chr2	76840589	76840605	17	-	1000	400	5	5	Ttn	introns	No_boundary
chr2	76840606	76840657	52	-	1000	400	5	5	Ttn	introns	No_boundary
chr2	76840750	76840801	52	-	1000	400	5	5	Ttn	introns	No_boundary
chr2	76840802	76840871	70	-	1000	400	5	5	Ttn	introns	No_boundary
chr2	76840872	76840889	18	-	1000	400	5	5	Ttn	introns	No_boundary
chr2	76840890	76840942	53	-	1000	400	5	5	Ttn	introns	No_boundary
chr2	76840943	76840952	10	-	1000	400	5	5	Ttn	introns	No_boundary
chr2	76840953	76840984	32	-	1000	400	5	5	Ttn	introns	No_boundary
chr2	76840985	76841036	52	-	1000	400	5	5	Ttn	introns	No_boundary
chr2	76841037	76841050	14	-	1000	400	5	5	Ttn	introns	No_boundary
chr2	76841051	76841122	72	-	1000	400	5	5	Ttn	cds	Exon_intron_boundary
chr2	76841123	76841130	8	-	1000	400	5	5	Ttn	cds	Exon_intron_boundary
chr2	76841131	76841147	17	-	1000	400	5	5	Ttn	cds	Exon_intron_boundary
chr2	76841152	76841175	24	-	1000	400	5	5	Ttn	cds	Exon_intron_boundary
chr2	76841176	76841227	52	-	1000	400	5	5	Ttn	cds	Exon_intron_boundary
chr2	76841228	76841251	24	-	1000	400	5	5	Ttn	cds	Exon_intron_boundary
chr2	76841252	76841303	52	-	1000	400	5	5	Ttn	cds	Exon_intron_boundary
chr2	76841304	76841344	41	-	1000	400	5	5	Ttn	cds	Exon_intron_boundary
chr2	76841345	76841359	15	-	1000	400	5	5	Ttn	cds	Exon_intron_boundary
chr2	76841360	76841414	55	-	1000	400	5	5	Ttn	cds	Exon_intron_boundary
chr2	76841415	76841464	50	-	1000	400	5	5	Ttn	introns	No_boundary
chr2	76841474	76841502	29	-	1000	400	5	5	Ttn	introns	No_boundary
chr2	76841503	76841531	29	-	1000	400	5	5	Ttn	introns	No_boundary
chr2	76841532	76841600	69	-	1000	400	5	5	Ttn	cds	Exon_intron_boundary
chr2	76841601	76841616	16	-	1000	400	5	5	Ttn	cds	Exon_intron_boundary
chr2	76841619	76841627	9	-	1000	400	5	5	Ttn	cds	Exon_intron_boundary
chr2	76841628	76841645	18	-	1000	400	5	5	Ttn	introns	No_boundary
chr2	76841787	76841811	25	-	1000	400	5	5	Ttn	cds	Exon_intron_boundary
chr2	76841812	76841816	5	-	1000	400	5	5	Ttn	cds	Exon_intron_boundary
chr2	76841817	76841824	8	-	1000	400	5	5	Ttn	cds	Exon_intron_boundary
chr2	76841825	76841935	111	-	1000	400	5	5	Ttn	cds	Exon_intron_boundary
chr2	76841936	76842021	86	-	1000	400	5	5	Ttn	introns	No_boundary
chr2	76842170	76842267	98	-	1000	400	5	5	Ttn	introns	No_boundary
chr2	76842464	76842533	70	-	1000	400	5	5	Ttn	introns	No_boundary
chr2	76842563	76842634	72	-	1000	400	5	5	Ttn	introns	No_boundary
chr2	76842654	76842659	6	-	1000	400	5	5	Ttn	introns	No_boundary
chr2	76842660	76842729	70	-	1000	400	5	5	Ttn	introns	No_boundary
chr2	76842730	76842807	78	-	1000	400	5	5	Ttn	cds	Exon_intron_boundary
chr2	76842808	76842816	9	-	1000	400	5	5	Ttn	cds	Exon_intron_boundary
chr2	76842817	76842824	8	-	1000	400	5	5	Ttn	cds	Exon_intron_boundary
chr2	76842825	76842840	16	-	1000	400	5	5	Ttn	cds	Exon_intron_boundary
chr2	76842841	76842849	9	-	1000	400	5	5	Ttn	cds	Exon_intron_boundary
chr2	76842850	76842856	7	-	1000	400	5	5	Ttn	introns	No_boundary
chr2	76843075	76843123	49	-	1000	400	5	5	Ttn	introns	No_boundary
chr2	76843124	76843156	33	-	1000	400	5	5	Ttn	introns	No_boundary
chr2	76843157	76843217	61	-	1000	400	5	5	Ttn	introns	No_boundary
chr2	76843268	76843367	100	-	1000	400	5	5	Ttn	introns	No_boundary
chr2	76843368	76843475	108	-	1000	400	5	5	Ttn	cds	Exon_intron_boundary
chr2	76843476	76843482	7	-	1000	400	5	5	Ttn	cds	Exon_intron_boundary
chr2	76843483	76843548	66	-	1000	400	5	5	Ttn	cds	Exon_intron_boundary
chr2	76843549	76843554	6	-	1000	400	5	5	Ttn	introns	No_boundary
chr2	76843555	76843568	14	-	1000	400	5	5	Ttn	introns	No_boundary
chr2	76843569	76843623	55	-	1000	400	5	5	Ttn	introns	No_boundary
chr2	76843787	76843853	67	-	1000	400	5	5	Ttn	introns	No_boundary
chr2	76843854	76843878	25	-	1000	400	5	5	Ttn	introns	No_boundary
chr2	76843879	76843935	57	-	1000	400	5	5	Ttn	introns	No_boundary
chr2	76843936	76843969	34	-	1000	400	5	5	Ttn	introns	No_boundary
chr2	76843970	76843992	23	-	1000	400	5	5	Ttn	introns	No_boundary
chr2	76843993	76844007	15	-	1000	400	5	5	Ttn	introns	No_boundary
chr2	76844008	76844017	10	-	1000	400	5	5	Ttn	introns	No_boundary
chr2	76844018	76844131	114	-	1000	400	5	5	Ttn	introns	No_boundary
chr2	76844132	76844184	53	-	1000	400	5	5	Ttn	introns	No_boundary
chr2	76844185	76844200	16	-	1000	400	5	5	Ttn	introns	No_boundary
chr2	76844201	76844220	20	-	1000	400	5	5	Ttn	cds	Exon_intron_boundary
chr2	76844221	76844271	51	-	1000	400	5	5	Ttn	cds	Exon_intron_boundary
chr2	76844272	76844314	43	-	1000	400	5	5	Ttn	cds	Exon_intron_boundary
chr2	76844315	76844490	176	-	1000	400	5	5	Ttn	introns	No_boundary
chr2	76844491	76844502	12	-	1000	400	5	5	Ttn	introns	No_boundary
chr2	76844503	76844534	32	-	1000	400	5	5	Ttn	introns	No_boundary
chr2	76844535	76844580	46	-	1000	400	5	5	Ttn	introns	No_boundary
chr2	76844581	76844672	92	-	1000	400	5	5	Ttn	introns	No_boundary
chr2	76844740	76844789	50	-	1000	400	5	5	Ttn	introns	No_boundary
chr2	76844790	76844820	31	-	1000	400	5	5	Ttn	introns	No_boundary
chr2	76844821	76844829	9	-	1000	400	5	5	Ttn	introns	No_boundary
chr2	76844830	76844857	28	-	1000	400	5	5	Ttn	introns	No_boundary
chr2	76844858	76844863	6	-	1000	400	5	5	Ttn	introns	No_boundary
chr2	76844864	76844900	37	-	1000	400	5	5	Ttn	introns	No_boundary
chr2	76844901	76844932	32	-	1000	400	5	5	Ttn	introns	No_boundary
chr2	76844933	76845006	74	-	1000	400	5	5	Ttn	introns	No_boundary
chr2	76845007	76845024	18	-	1000	400	5	5	Ttn	introns	No_boundary
chr2	76845025	76845047	23	-	1000	400	5	5	Ttn	cds	Exon_intron_boundary
chr2	76845048	76845057	10	-	1000	400	5	5	Ttn	cds	Exon_intron_boundary
chr2	76845058	76845076	19	-	1000	400	5	5	Ttn	cds	Exon_intron_boundary
chr2	76845080	76845088	9	-	1000	400	5	5	Ttn	cds	Exon_intron_boundary
chr2	76845089	76845098	10	-	1000	400	5	5	Ttn	cds	Exon_intron_boundary
chr2	76845099	76845111	13	-	1000	400	5	5	Ttn	introns	No_boundary
chr2	76845112	76845124	13	-	1000	400	5	5	Ttn	introns	No_boundary
chr2	76845125	76845161	37	-	1000	400	5	5	Ttn	introns	No_boundary
chr2	76845162	76845243	82	-	1000	400	5	5	Ttn	introns	No_boundary
chr2	76845244	76845306	63	-	1000	400	5	5	Ttn	introns	No_boundary
chr2	76845307	76845348	42	-	1000	400	5	5	Ttn	introns	No_boundary
chr2	76845454	76845491	38	-	1000	400	5	5	Ttn	introns	No_boundary
chr2	76845990	76846066	77	-	1000	400	5	5	Ttn	introns	No_boundary
chr2	76846067	76846095	29	-	1000	400	5	5	Ttn	introns	No_boundary
chr2	76846252	76846261	10	-	1000	400	5	5	Ttn	cds	Exon_intron_boundary
chr2	76846262	76846323	62	-	1000	400	5	5	Ttn	cds	Exon_intron_boundary
chr2	76846324	76846329	6	-	1000	400	5	5	Ttn	introns	No_boundary
chr2	76846330	76846370	41	-	1000	400	5	5	Ttn	introns	No_boundary
chr2	76846371	76846436	66	-	1000	400	5	5	Ttn	introns	No_boundary
chr2	76846460	76846494	35	-	1000	400	5	5	Ttn	introns	No_boundary
chr2	76846495	76846846	352	-	1000	400	5	5	Ttn	cds	Exon_intron_boundary
chr2	76846860	76846927	68	-	1000	400	5	5	Ttn	cds	Exon_intron_boundary
chr2	76846939	76846963	25	-	1000	400	5	5	Ttn	introns	No_boundary
chr2	76847136	76847178	43	-	1000	400	5	5	Ttn	cds	Exon_intron_boundary
chr2	76847179	76847190	12	-	1000	400	5	5	Ttn	cds	Exon_intron_boundary
chr2	76847191	76847198	8	-	1000	400	5	5	Ttn	cds	Exon_intron_boundary
chr2	76847304	76847362	59	-	1000	400	5	5	Ttn	introns	No_boundary
chr2	76847363	76847380	18	-	1000	400	5	5	Ttn	introns	No_boundary
chr2	76847418	76847437	20	-	1000	400	5	5	Ttn	cds	Exon_intron_boundary
chr2	76847438	76847473	36	-	1000	400	5	5	Ttn	cds	Exon_intron_boundary
chr2	76847474	76847482	9	-	1000	400	5	5	Ttn	introns	No_boundary
chr2	76847555	76847594	40	-	1000	400	5	5	Ttn	introns	No_boundary
chr2	76847748	76847816	69	-	1000	400	5	5	Ttn	cds	Exon_intron_boundary
chr2	76847867	76848004	138	-	1000	400	5	5	Ttn	introns	No_boundary
chr2	76848183	76848228	46	-	1000	400	5	5	Ttn	introns	No_boundary
chr2	76848276	76848297	22	-	1000	400	5	5	Ttn	cds	Exon_intron_boundary
chr2	76848302	76848348	47	-	1000	400	5	5	Ttn	cds	Exon_intron_boundary
chr2	76848349	76848357	9	-	1000	400	5	5	Ttn	cds	Exon_intron_boundary
chr2	76848358	76848363	6	-	1000	400	5	5	Ttn	introns	No_boundary
chr2	76848364	76848384	21	-	1000	400	5	5	Ttn	introns	No_boundary
chr2	76848389	76848419	31	-	1000	400	5	5	Ttn	introns	No_boundary
chr2	76848420	76848424	5	-	1000	400	5	5	Ttn	introns	No_boundary
chr2	76848425	76848475	51	-	1000	400	5	5	Ttn	introns	No_boundary
chr2	76848532	76848581	50	-	1000	400	5	5	Ttn	cds	Exon_intron_boundary
chr2	76848582	76848599	18	-	1000	400	5	5	Ttn	cds	Exon_intron_boundary
chr2	76848600	76848611	12	-	1000	400	5	5	Ttn	cds	Exon_intron_boundary
chr2	76848612	76848621	10	-	1000	400	5	5	Ttn	cds	Exon_intron_boundary
chr2	76848622	76848644	23	-	1000	400	5	5	Ttn	cds	Exon_intron_boundary
chr2	76848727	76848769	43	-	1000	400	5	5	Ttn	introns	No_boundary
chr2	76848813	76848905	93	-	1000	400	5	5	Ttn	cds	Exon_intron_boundary
chr2	76848906	76848960	55	-	1000	400	5	5	Ttn	cds	Exon_intron_boundary
chr2	76848961	76848978	18	-	1000	400	5	5	Ttn	cds	Exon_intron_boundary
chr2	76848979	76848998	20	-	1000	400	5	5	Ttn	cds	Exon_intron_boundary
chr2	76849051	76849079	29	-	1000	400	5	5	Ttn	cds	Exon_intron_boundary
chr2	76849080	76849162	83	-	1000	400	5	5	Ttn	cds	Exon_intron_boundary
chr2	76849163	76849188	26	-	1000	400	5	5	Ttn	cds	Exon_intron_boundary
chr2	76849189	76849237	49	-	1000	400	5	5	Ttn	introns	No_boundary
chr2	76849349	76849400	52	-	1000	400	5	5	Ttn	introns	No_boundary
chr2	76849571	76849611	41	-	1000	400	5	5	Ttn	introns	No_boundary
chr2	76849612	76849622	11	-	1000	400	5	5	Ttn	introns	No_boundary
chr2	76849623	76849655	33	-	1000	400	5	5	Ttn	introns	No_boundary
chr2	76849897	76849909	13	-	1000	400	5	5	Ttn	introns	No_boundary
chr2	76849910	76849966	57	-	1000	400	5	5	Ttn	introns	No_boundary
chr2	76849967	76850025	59	-	1000	400	5	5	Ttn	cds	Exon_intron_boundary
chr2	76850026	76850046	21	-	1000	400	5	5	Ttn	cds	Exon_intron_boundary
chr2	76850047	76850077	31	-	1000	400	5	5	Ttn	cds	Exon_intron_boundary
chr2	76850078	76850122	45	-	1000	400	5	5	Ttn	cds	Exon_intron_boundary
chr2	76850123	76850144	22	-	1000	400	5	5	Ttn	introns	No_boundary
chr2	76850145	76850181	37	-	1000	400	5	5	Ttn	introns	No_boundary
chr2	76850182	76850249	68	-	1000	400	5	5	Ttn	introns	No_boundary
chr2	76850334	76850370	37	-	1000	400	5	5	Ttn	cds	Exon_intron_boundary
chr2	76850371	76850387	17	-	1000	400	5	5	Ttn	cds	Exon_intron_boundary
chr2	76850388	76850446	59	-	1000	400	5	5	Ttn	introns	No_boundary
chr2	76850447	76850483	37	-	1000	400	5	5	Ttn	introns	No_boundary
chr2	76852153	76852255	103	-	1000	400	5	5	Ttn	introns	No_boundary
chr2	76852341	76852505	165	-	1000	400	5	5	Ttn	introns	No_boundary
chr2	76852506	76852567	62	-	1000	400	5	5	Ttn	introns	No_boundary
chr2	76852568	76852592	25	-	1000	400	5	5	Ttn	introns	No_boundary
chr2	76852697	76852716	20	-	1000	400	5	5	Ttn	introns	No_boundary
chr2	76852717	76852721	5	-	1000	400	5	5	Ttn	introns	No_boundary
chr2	76852722	76852820	99	-	1000	400	5	5	Ttn	introns	No_boundary
chr2	76852858	76852911	54	-	1000	400	5	5	Ttn	cds	Exon_intron_boundary
chr2	76852912	76852917	6	-	1000	400	5	5	Ttn	cds	Exon_intron_boundary
chr2	76852918	76852936	19	-	1000	400	5	5	Ttn	introns	No_boundary
chr2	76852937	76853033	97	-	1000	400	5	5	Ttn	introns	No_boundary
chr2	76853222	76853238	17	-	1000	400	5	5	Ttn	cds	Exon_intron_boundary
chr2	76853239	76853252	14	-	1000	400	5	5	Ttn	introns	No_boundary
chr2	76853413	76853455	43	-	1000	400	5	5	Ttn	introns	No_boundary
chr2	76853456	76853506	51	-	1000	400	5	5	Ttn	introns	No_boundary
chr2	76853525	76853554	30	-	1000	400	5	5	Ttn	introns	No_boundary
chr2	76853624	76853637	14	-	1000	400	5	5	Ttn	cds	Exon_intron_boundary
chr2	76853638	76853680	43	-	1000	400	5	5	Ttn	cds	Exon_intron_boundary
chr2	76853856	76853930	75	-	1000	400	5	5	Ttn	cds	Exon_intron_boundary
chr2	76853971	76854004	34	-	1000	400	5	5	Ttn	introns	No_boundary
chr2	76854005	76854054	50	-	1000	400	5	5	Ttn	introns	No_boundary
chr2	76856265	76856276	12	-	1000	400	5	5	Ttn	cds	Exon_intron_boundary
chr2	76856277	76856383	107	-	1000	400	5	5	Ttn	cds	Exon_intron_boundary
chr2	76856393	76856565	173	-	1000	400	5	5	Ttn	introns	No_boundary
chr2	76856566	76856585	20	-	1000	400	5	5	Ttn	introns	No_boundary
chr2	76856610	76856649	40	-	1000	400	5	5	Ttn	introns	No_boundary
chr2	76856650	76856705	56	-	1000	400	5	5	Ttn	introns	No_boundary
chr2	76856808	76856827	20	-	1000	400	5	5	Ttn	cds	Exon_intron_boundary
chr2	76856828	76856867	40	-	1000	400	5	5	Ttn	cds	Exon_intron_boundary
chr2	76856868	76856912	45	-	1000	400	5	5	Ttn	cds	Exon_intron_boundary
chr2	76856913	76856965	53	-	1000	400	5	5	Ttn	introns	No_boundary
chr2	76856966	76856972	7	-	1000	400	5	5	Ttn	introns	No_boundary
chr2	76856973	76857001	29	-	1000	400	5	5	Ttn	introns	No_boundary
chr2	76857002	76857065	64	-	1000	400	5	5	Ttn	introns	No_boundary
chr2	76857066	76857171	106	-	1000	400	5	5	Ttn	cds	Exon_intron_boundary
chr2	76857176	76857208	33	-	1000	400	5	5	Ttn	cds	Exon_intron_boundary
chr2	76857209	76857238	30	-	1000	400	5	5	Ttn	cds	Exon_intron_boundary
chr2	76857239	76857352	114	-	1000	400	5	5	Ttn	introns	No_boundary
chr2	76857415	76857422	8	-	1000	400	5	5	Ttn	cds	Exon_intron_boundary
chr2	76857423	76857483	61	-	1000	400	5	5	Ttn	cds	Exon_intron_boundary
chr2	76857492	76857564	73	-	1000	400	5	5	Ttn	introns	No_boundary
chr2	76857636	76857673	38	-	1000	400	5	5	Ttn	cds	Exon_intron_boundary
chr2	76857674	76857697	24	-	1000	400	5	5	Ttn	cds	Exon_intron_boundary
chr2	76894472	76894597	126	-	1000	400	5	5	Ttn	introns	No_boundary
chr2	76896941	76896967	27	-	1000	400	5	5	Ttn	cds	Exon_intron_boundary
chr2	76896968	76896994	27	-	1000	400	5	5	Ttn	cds	Exon_intron_boundary
chr2	76901302	76901385	84	-	1000	400	5	5	Ttn	introns	No_boundary
chr2	76902019	76902202	184	-	1000	400	5	5	Ttn	cds	Exon_intron_boundary
chr2	76902229	76902296	68	-	1000	400	5	5	Ttn	introns	No_boundary
chr4	102216314	102216326	13	+	1000	400	5	5	Pde4b	introns	No_boundary
chr4	102379513	102379521	9	+	1000	400	5	5	Pde4b	introns	No_boundary
chr2	76840658	76840683	26	-	1000	318.353	5	5	Ttn	introns	No_boundary
chr2	76824136	76824145	10	-	1000	317.537	5	5	Ttn	introns	No_boundary
chr2	76833832	76834070	239	-	1000	314.801	5	5	Ttn	cds	Exon_intron_boundary
chr2	76841646	76841786	141	-	1000	308.073	5	5	Ttn	cds	Exon_intron_boundary
chr2	76847199	76847249	51	-	1000	307.075	5	5	Ttn	introns	No_boundary
chr2	76846964	76847012	49	-	1000	305.929	5	5	Ttn	introns	No_boundary
chr2	76840478	76840568	91	-	1000	305.379	5	5	Ttn	introns	No_boundary
chr2	76827347	76827360	14	-	1000	303.815	5	5	Ttn	introns	No_boundary
chr2	76826866	76826953	88	-	1000	295.754	5	5	Ttn	introns	No_boundary
chr2	76843218	76843231	14	-	1000	295.487	5	5	Ttn	introns	No_boundary
chr2	76836040	76836063	24	-	1000	294.121	5	5	Ttn	introns	No_boundary
chr2	76847013	76847135	123	-	1000	292.238	5	5	Ttn	cds	Exon_intron_boundary
chr2	76831472	76831519	48	-	1000	290.181	5	5	Ttn	introns	No_boundary
chr2	76833607	76833656	50	-	1000	286.646	5	5	Ttn	cds	Exon_intron_boundary
chr2	76847250	76847264	15	-	1000	282.961	5	5	Ttn	introns	No_boundary
chr2	76843671	76843733	63	-	1000	281.074	5	5	Ttn	introns	No_boundary
chr2	76843766	76843786	21	-	1000	281.074	5	5	Ttn	introns	No_boundary
chr2	76842857	76843062	206	-	1000	273.709	5	5	Ttn	introns	No_boundary
chr2	76824252	76824316	65	-	1000	273.222	5	5	Ttn	cds	Exon_intron_boundary
chr2	76827831	76827843	13	-	1000	268.65	5	5	Ttn	introns	No_boundary
chr2	76827689	76827709	21	-	1000	267.971	5	5	Ttn	cds	Exon_intron_boundary
chr2	76838656	76838779	124	-	1000	267.909	5	5	Ttn	introns	No_boundary
chr2	76834508	76834539	32	-	1000	264.344	5	5	Ttn	introns	No_boundary
chr2	76825202	76825259	58	-	1000	258.788	5	5	Ttn	introns	No_boundary
chr2	76848645	76848726	82	-	1000	258.25	5	5	Ttn	introns	No_boundary
chr2	76847265	76847303	39	-	1000	255	5	5	Ttn	introns	No_boundary
chr2	76840380	76840392	13	-	1000	251.429	5	5	Ttn	introns	No_boundary
chr2	76840393	76840416	24	-	1000	249.652	5	5	Ttn	introns	No_boundary
chr2	76823174	76823193	20	-	1000	249.396	5	5	Ttn	introns	No_boundary
chr2	76827287	76827308	22	-	1000	245.844	5	5	Ttn	introns	No_boundary
chr2	76831331	76831382	52	-	1000	244.853	5	5	Ttn	cds	Exon_intron_boundary
chr2	76826650	76826694	45	-	1000	243.605	5	5	Ttn	introns	No_boundary
chr2	76826507	76826623	117	-	1000	242.807	5	5	Ttn	cds	Exon_intron_boundary
chr2	76843063	76843074	12	-	1000	238.562	5	5	Ttn	introns	No_boundary
chr2	76825194	76825201	8	-	1000	235.005	5	5	Ttn	introns	No_boundary
chr2	76829806	76829825	20	-	1000	234.659	5	5	Ttn	introns	No_boundary
chr2	76824701	76824710	10	-	1000	232.458	5	5	Ttn	introns	No_boundary
chr2	76853681	76853696	16	-	1000	231.461	5	5	Ttn	cds	Exon_intron_boundary
chr2	76835674	76835793	120	-	1000	229.937	5	5	Ttn	introns	No_boundary
chr2	76826984	76827018	35	-	1000	228.939	5	5	Ttn	cds	Exon_intron_boundary
chr2	76835552	76835673	122	-	1000	223.777	5	5	Ttn	introns	No_boundary
chr2	76842433	76842457	25	-	1000	223.298	5	5	Ttn	introns	No_boundary
chr2	76836298	76836381	84	-	1000	220.086	5	5	Ttn	cds	Exon_intron_boundary
chr2	76901386	76901440	55	-	1000	215.452	5	5	Ttn	introns	No_boundary
chr2	76839981	76840009	29	-	1000	212.986	5	5	Ttn	introns	No_boundary
chr2	76847601	76847617	17	-	1000	208.619	5	5	Ttn	introns	No_boundary
chr2	76834502	76834507	6	-	1000	206.79	5	5	Ttn	introns	No_boundary
chr13	11626518	11626671	154	-	1000	95.8952	5	5	Ryr2	introns	No_boundary
chr14	34572225	34572418	194	-	1000	86.7798	5	5	Ldb3	introns	No_boundary
chr19	5800390	5800409	20	-	1000	86.3612	5	5	Malat1	exons	No_boundary
chr19	5796095	5796112	18	-	1000	85.33	5	5	NA	introns	No_boundary
chr13	11625580	11625682	103	-	1000	85.0328	5	5	Ryr2	introns	No_boundary
chr19	5843706	5843791	86	-	1000	83.4885	5	5	Neat1	exons	No_boundary
chr13	11634667	11634820	154	-	1000	83.1251	5	5	Ryr2	introns	No_boundary
chr19	5800651	5800730	80	-	1000	83.0633	5	5	Malat1	exons	No_boundary
chr19	5797632	5797674	43	-	1000	81.9715	5	5	Malat1	exons	No_boundary
chr19	5800741	5800745	5	-	1000	80.1186	5	5	Malat1	exons	No_boundary
chr13	11625683	11625937	255	-	1000	79.2553	5	5	Ryr2	introns	No_boundary
chr19	5839136	5839222	87	-	1000	78.82	5	5	Neat1	exons	No_boundary
chr16	37885273	37885350	78	+	1000	78.0799	5	5	Lrrc58	3UTRs	No_boundary
chr14	34571063	34571166	104	-	1000	76.0101	5	5	Ldb3	introns	No_boundary
chr19	5800731	5800740	10	-	1000	74.8692	5	5	Malat1	exons	No_boundary
chr19	5799601	5799621	21	-	1000	73.9751	5	5	Malat1	exons	No_boundary
chr19	5798736	5798767	32	-	1000	73.875	5	5	Malat1	exons	No_boundary
chr14	34571504	34571656	153	-	1000	72.9866	5	5	Ldb3	introns	No_boundary
chr19	5844657	5844844	188	-	1000	72.8006	5	5	NA	introns	Exon_intron_boundary
chr19	5800144	5800178	35	-	1000	72.3919	5	5	Malat1	exons	No_boundary
chr1	135845681	135845769	89	+	1000	71.5262	5	5	Tnnt2	introns	Exon_intron_boundary
chr14	34573533	34573618	86	-	1000	70.828	5	5	Ldb3	introns	No_boundary
chr14	34573862	34574009	148	-	1000	69.9498	5	5	Ldb3	introns	No_boundary
chr19	5799293	5799298	6	-	1000	69.6954	5	5	Malat1	exons	No_boundary
chr19	5799215	5799246	32	-	1000	69.6225	5	5	Malat1	exons	No_boundary
chr14	34571657	34571784	128	-	1000	69.221	5	5	Ldb3	cds	Exon_intron_boundary
chr14	34570571	34570689	119	-	1000	68.9681	5	5	Ldb3	introns	No_boundary
chr19	5797017	5797033	17	-	1000	68.5607	5	5	Malat1	exons	No_boundary
chr19	5834411	5834523	113	-	1000	68.2583	5	5	Neat1	exons	No_boundary
chr19	5796127	5796224	98	-	1000	67.9087	5	5	NA	introns	No_boundary
chr16	37885510	37885711	202	+	1000	67.6569	5	5	Lrrc58	3UTRs	No_boundary
chr14	34571882	34572098	217	-	1000	67.4325	5	5	Ldb3	cds	Exon_intron_boundary
chr14	34573619	34573812	194	-	1000	67.3709	5	5	Ldb3	introns	No_boundary
chr13	11626350	11626517	168	-	1000	67.1469	5	5	Ryr2	introns	No_boundary
chr13	11625950	11626025	76	-	1000	67.1356	5	5	Ryr2	introns	No_boundary
chr19	5845211	5845268	58	-	1000	66.7875	5	5	Neat1	exons	No_boundary
chr14	54973718	54973768	51	+	1000	66.5434	5	5	Mhrt	introns	Exon_intron_boundary
chr19	5800775	5800781	7	-	1000	64.5053	5	5	Malat1	exons	No_boundary
chr13	11624572	11624789	218	-	1000	64.0587	5	5	Ryr2	introns	No_boundary
chr19	5800189	5800194	6	-	1000	64.0466	5	5	Malat1	exons	No_boundary
chr14	34569747	34569829	83	-	1000	63.583	5	5	Ldb3	introns	No_boundary
chr19	5800746	5800766	21	-	1000	63.5201	5	5	Malat1	exons	No_boundary
chr19	5799320	5799384	65	-	1000	62.9406	5	5	Malat1	exons	No_boundary
chr2	76906641	76906706	66	-	1000	62.5805	5	5	Ttn	introns	Intron_exon_boundary
chr1	135844263	135844347	85	+	1000	62.551	5	5	Tnnt2	introns	No_boundary
chr14	54970101	54970317	217	+	1000	62.4397	5	5	Mhrt	introns	No_boundary
chr19	5800767	5800774	8	-	1000	62.3857	5	5	Malat1	exons	No_boundary
chr19	5844845	5844933	89	-	1000	62.0532	5	5	NA	introns	Exon_intron_boundary
chr19	5843498	5843705	208	-	1000	61.9134	5	5	Neat1	exons	No_boundary
chr11	52389137	52389271	135	+	1000	61.8595	5	5	Vdac1	3UTRs	Exon_intron_boundary
chr19	5844087	5844106	20	-	1000	60.8026	5	5	Neat1	exons	No_boundary
chr14	34576727	34576871	145	-	1000	59.3283	5	5	Ldb3	introns	Exon_intron_boundary
chr14	54952098	54952181	84	-	1000	59.3269	5	5	Myh6	introns	Exon_intron_boundary
chr19	5800133	5800143	11	-	1000	59.0598	5	5	Malat1	exons	No_boundary
chr19	5798159	5798183	25	-	1000	58.5532	5	5	Malat1	exons	No_boundary
chr14	34568647	34568826	180	-	1000	58.3848	5	5	Ldb3	introns	No_boundary
chr19	5841810	5841885	76	-	1000	57.8588	5	5	Neat1	exons	No_boundary
chr13	11626026	11626204	179	-	1000	57.8497	5	5	Ryr2	introns	No_boundary
chr19	5844107	5844234	128	-	1000	57.1929	5	5	Neat1	exons	No_boundary
chr19	5798643	5798690	48	-	1000	56.4855	5	5	Malat1	exons	No_boundary
chr13	11633806	11633928	123	-	1000	55.9922	5	5	Ryr2	introns	No_boundary
chr13	11624870	11625064	195	-	1000	55.8795	5	5	Ryr2	introns	No_boundary
chr14	54974089	54974260	172	+	1000	55.6249	5	5	Mhrt	exons	Exon_intron_boundary
chr19	5841514	5841597	84	-	1000	55.3345	5	5	Neat1	exons	No_boundary
chr13	11632969	11633083	115	-	1000	53.984	5	5	Ryr2	introns	No_boundary
chr13	11626922	11627095	174	-	1000	53.8958	5	5	Ryr2	introns	No_boundary
chr17	17528038	17528098	61	-	1000	53.7004	5	5	Lnpep	3UTRs	No_boundary
chr19	5799385	5799401	17	-	1000	53.6333	5	5	Malat1	exons	No_boundary
chr14	54969593	54969729	137	+	1000	53.4956	5	5	Mhrt	introns	No_boundary
chr14	34574224	34574399	176	-	1000	53.1716	5	5	Ldb3	introns	No_boundary
chr14	34570157	34570329	173	-	1000	52.3982	5	5	Ldb3	introns	No_boundary
chr14	54973595	54973643	49	+	1000	52.3971	5	5	Mhrt	introns	Exon_intron_boundary
chr19	5832669	5832746	78	-	1000	52.3214	5	5	Neat1	exons	No_boundary
chr19	5841635	5841703	69	-	1000	52.2154	5	5	Neat1	exons	No_boundary
chr17	17528015	17528037	23	-	1000	52.1797	5	5	Lnpep	3UTRs	No_boundary
chr19	5800127	5800132	6	-	1000	52.1663	5	5	Malat1	exons	No_boundary
chr16	37888157	37888256	100	+	1000	51.7839	5	5	Lrrc58	3UTRs	No_boundary
chr14	34574422	34574585	164	-	1000	51.4824	5	5	Ldb3	introns	No_boundary
chr13	101681237	101681512	276	-	1000	50.9183	5	5	Pik3r1	3UTRs	No_boundary
chr16	37887302	37887396	95	+	1000	50.8825	5	5	Lrrc58	3UTRs	No_boundary
chr19	5833850	5833922	73	-	1000	50.5878	5	5	Neat1	exons	No_boundary
chr14	54962343	54962370	28	-	1000	50.5571	5	5	Myh6	introns	No_boundary
chr19	5801088	5801118	31	-	1000	50.3774	5	5	Malat1	exons	No_boundary
chr13	11625293	11625427	135	-	1000	50.199	5	5	Ryr2	introns	No_boundary
chr14	54969304	54969369	66	+	1000	50.1716	5	5	Mhrt	introns	No_boundary
chr19	5844586	5844656	71	-	1000	50.0821	5	5	Neat1	exons	No_boundary
chr19	5801041	5801068	28	-	1000	50.0436	5	5	Malat1	exons	No_boundary
chr19	5799270	5799292	23	-	1000	49.9699	5	5	Malat1	exons	No_boundary
chr19	5798623	5798642	20	-	1000	49.5972	5	5	Malat1	exons	No_boundary
chr14	34571167	34571296	130	-	1000	48.8996	5	5	Ldb3	introns	No_boundary
chr14	34574010	34574141	132	-	1000	48.7542	5	5	Ldb3	introns	No_boundary
chr13	11625065	11625274	210	-	1000	48.5138	5	5	Ryr2	introns	No_boundary
chr14	54960601	54960645	45	-	1000	48.404	5	5	Myh6	introns	Intron_exon_boundary
chr19	5801076	5801082	7	-	1000	48.39	5	5	Malat1	exons	No_boundary
chr19	5801069	5801075	7	-	1000	48.0485	5	5	Malat1	exons	No_boundary
chr13	101682390	101682477	88	-	1000	47.8229	5	5	Pik3r1	3UTRs	No_boundary
chr6	71391991	71392104	114	-	1000	47.1932	5	5	Rmnd5a	3UTRs	No_boundary
chr19	5843889	5844086	198	-	1000	47.0238	5	5	Neat1	exons	No_boundary
chr13	11626223	11626349	127	-	1000	46.8224	5	5	Ryr2	introns	No_boundary
chr13	101682576	101682966	391	-	1000	46.8081	5	5	Pik3r1	3UTRs	No_boundary
chr14	34576124	34576568	445	-	1000	46.7811	5	5	Ldb3	introns	No_boundary
chr1	135844191	135844262	72	+	1000	46.7577	5	5	Tnnt2	introns	No_boundary
chr19	5845073	5845210	138	-	1000	46.453	5	5	NA	introns	Exon_intron_boundary
chr13	11627096	11627205	110	-	1000	45.9669	5	5	Ryr2	introns	No_boundary
chr14	54965136	54965221	86	-	1000	45.9152	5	5	Myh6	introns	Exon_intron_boundary
chr19	5842931	5843013	83	-	1000	45.6427	5	5	Neat1	exons	No_boundary
chr14	54970891	54971295	405	+	1000	45.587	5	5	Mhrt	introns	Exon_intron_boundary
chr13	101680795	101680899	105	-	1000	45.5556	5	5	Pik3r1	3UTRs	No_boundary
chr13	11623487	11624131	645	-	1000	45.5301	5	5	Ryr2	introns	No_boundary
chr14	34571347	34571488	142	-	1000	45.5156	5	5	Ldb3	introns	No_boundary
chr13	11624344	11624384	41	-	1000	45.4677	5	5	Ryr2	introns	No_boundary
chr13	101681099	101681195	97	-	1000	45.3456	5	5	Pik3r1	3UTRs	No_boundary
chr14	54968907	54968980	74	+	1000	45.3329	5	5	Mhrt	introns	Exon_intron_boundary
chr13	11626736	11626921	186	-	1000	45.2386	5	5	Ryr2	introns	No_boundary
chr3	97724444	97724617	174	-	1000	44.6672	5	5	Pde4dip	introns	Intron_exon_boundary
chr19	5842351	5842510	160	-	1000	44.5878	5	5	Neat1	exons	No_boundary
chr16	37885112	37885201	90	+	1000	44.4057	5	5	Lrrc58	3UTRs	No_boundary
chr1	135844987	135845101	115	+	1000	43.8876	5	5	Tnnt2	introns	No_boundary
chr19	5799252	5799269	18	-	1000	43.7692	5	5	Malat1	exons	No_boundary
chr13	101683943	101684012	70	-	1000	43.6461	5	5	Pik3r1	3UTRs	No_boundary
chr14	54960584	54960600	17	-	1000	43.5688	5	5	Myh6	introns	Intron_exon_boundary
chr1	135846073	135846158	86	+	1000	43.3145	5	5	Tnnt2	introns	Exon_intron_boundary
chr14	34569941	34570131	191	-	1000	43.2013	5	5	Ldb3	introns	No_boundary
chr19	5837967	5838021	55	-	1000	43.0706	5	5	Neat1	exons	No_boundary
chr14	34575963	34576098	136	-	1000	42.9094	5	5	Ldb3	introns	No_boundary
chr1	135844535	135844658	124	+	1000	42.7158	5	5	Tnnt2	introns	No_boundary
chr13	11627335	11627403	69	-	1000	42.6965	5	5	Ryr2	introns	No_boundary
chr19	5838129	5838181	53	-	1000	42.4883	5	5	Neat1	exons	No_boundary
chr14	34572452	34572728	277	-	1000	42.3127	5	5	Ldb3	introns	No_boundary
chr14	54969027	54969079	53	+	1000	42.1912	5	5	Mhrt	introns	Exon_intron_boundary
chr4	102218131	102218137	7	+	1000	41.973	5	5	Pde4b	introns	No_boundary
chr4	102218138	102218143	6	+	1000	41.973	5	5	Pde4b	introns	No_boundary
chr13	101683150	101683525	376	-	1000	41.9604	5	5	Pik3r1	3UTRs	No_boundary
chr19	5845378	5845476	99	-	1000	41.8805	5	5	Neat1	exons	Intron_exon_boundary
chr14	54962371	54962455	85	-	1000	41.8466	5	5	Myh6	introns	No_boundary
chr13	101682504	101682569	66	-	1000	41.7839	5	5	Pik3r1	3UTRs	No_boundary
chr14	54969426	54969592	167	+	1000	41.6363	5	5	Mhrt	introns	No_boundary
chr14	54971548	54971595	48	+	1000	41.4789	5	5	Mhrt	introns	Exon_intron_boundary
chr14	54945311	54945400	90	-	1000	41.2989	5	5	Myh6	introns	No_boundary
chr14	54958350	54958429	80	-	1000	41.2777	5	5	Myh6	introns	Exon_intron_boundary
chr13	11624259	11624343	85	-	1000	41.2089	5	5	Ryr2	introns	No_boundary
chr19	5840690	5840929	240	-	1000	41.1549	5	5	Neat1	exons	No_boundary
chr14	34570690	34571027	338	-	1000	41.0349	5	5	Ldb3	introns	No_boundary
chr13	11634413	11634510	98	-	1000	40.6685	5	5	Ryr2	introns	No_boundary
chr19	5840576	5840618	43	-	1000	40.4376	5	5	Neat1	exons	No_boundary
chr13	11625432	11625579	148	-	1000	40.2447	5	5	Ryr2	introns	No_boundary
chr19	5796084	5796090	7	-	1000	40.0151	5	5	NA	introns	No_boundary
chr14	34575544	34575634	91	-	1000	39.8763	5	5	Ldb3	introns	No_boundary
chr19	5838323	5838333	11	-	1000	39.8756	5	5	Neat1	exons	No_boundary
chr19	5838262	5838322	61	-	1000	39.743	5	5	Neat1	exons	No_boundary
chr14	34575251	34575309	59	-	1000	39.6096	5	5	Ldb3	introns	No_boundary
chr17	17527741	17527941	201	-	1000	39.6007	5	5	Lnpep	3UTRs	No_boundary
chr14	54951229	54951306	78	-	1000	39.5861	5	5	Myh6	introns	No_boundary
chr14	54966462	54966534	73	-	1000	39.2091	5	5	Myh6	introns	Exon_intron_boundary
chr19	5844235	5844580	346	-	1000	38.8049	5	5	NA	introns	Exon_intron_boundary
chr13	101681513	101681701	189	-	1000	38.7462	5	5	Pik3r1	3UTRs	No_boundary
chr13	101684650	101684764	115	-	1000	38.6216	5	5	Pik3r1	3UTRs	No_boundary
chr14	34573242	34573532	291	-	1000	38.3783	5	5	Ldb3	introns	No_boundary
chr14	34577304	34577466	163	-	1000	38.2812	5	5	Ldb3	cds	Intron_exon_boundary
chr1	135850275	135850425	151	+	1000	38.2765	5	5	Tnnt2	cds	Exon_intron_boundary
chr2	76801405	76801588	184	-	1000	38.1836	5	5	Ttn	introns	No_boundary
chr14	34577866	34577960	95	-	1000	38.1314	5	5	Ldb3	introns	No_boundary
chr13	11635269	11635484	216	-	1000	37.9774	5	5	Ryr2	introns	Exon_intron_boundary
chr4	102454654	102454667	14	+	1000	37.8631	5	5	Pde4b	introns	No_boundary
chr19	5841950	5842023	74	-	1000	37.7511	5	5	Neat1	exons	No_boundary
chr13	11633659	11633732	74	-	1000	37.5428	5	5	Ryr2	introns	No_boundary
chr13	101681762	101681809	48	-	1000	37.4341	5	5	Pik3r1	3UTRs	No_boundary
chr14	34567521	34567640	120	-	1000	37.3361	5	5	Ldb3	cds	Exon_intron_boundary
chr14	34575059	34575207	149	-	1000	37.2782	5	5	Ldb3	introns	No_boundary
chr19	5841263	5841330	68	-	1000	36.8839	5	5	Neat1	exons	No_boundary
chr13	11627784	11627900	117	-	1000	36.7422	5	5	Ryr2	introns	No_boundary
chr13	11624385	11624393	9	-	1000	36.5637	5	5	Ryr2	introns	No_boundary
chr13	11633971	11634412	442	-	1000	36.2492	5	5	Ryr2	cds	Exon_intron_boundary
chr14	54949145	54949226	82	-	1000	35.6427	5	5	Myh6	introns	Exon_intron_boundary
chr1	135850442	135850495	54	+	1000	35.0267	5	5	Tnnt2	introns	No_boundary
chr7	81086891	81087052	162	+	1000	34.8813	5	5	Alpk3	introns	No_boundary
chr14	54958264	54958320	57	-	1000	34.6704	5	5	Myh6	introns	Exon_intron_boundary
chr13	11633147	11633236	90	-	1000	34.6203	5	5	Ryr2	introns	No_boundary
chr14	54969895	54970010	116	+	1000	34.5527	5	5	Mhrt	introns	No_boundary
chrX	101654440	101654515	76	+	1000	34.492	5	5	Ogt	introns	No_boundary
chr15	83149704	83149716	13	+	1000	34.4825	5	5	Rnu12	exons	Exon_intron_boundary
chr19	5841799	5841809	11	-	1000	34.0604	5	5	Neat1	exons	No_boundary
chr14	54970702	54970739	38	+	1000	33.4862	5	5	Mhrt	introns	No_boundary
chr19	5842187	5842295	109	-	1000	33.4286	5	5	Neat1	exons	No_boundary
chr19	5842624	5842798	175	-	1000	32.9345	5	5	Neat1	exons	No_boundary
chr1	135849741	135849816	76	+	1000	32.856	5	5	Tnnt2	introns	No_boundary
chr19	53758221	53758383	163	+	1000	32.7934	5	5	Rbm20	introns	No_boundary
chr14	54959170	54959251	82	-	1000	32.7498	5	5	Myh6	introns	No_boundary
chr19	5830847	5830961	115	-	1000	32.5539	5	5	Neat1	exons	No_boundary
chr16	37885755	37885798	44	+	1000	32.4548	5	5	Lrrc58	3UTRs	No_boundary
chr19	5843014	5843180	167	-	1000	32.3156	5	5	Neat1	exons	No_boundary
chr19	5801119	5801172	54	-	1000	32.2975	5	5	Malat1	exons	No_boundary
chr13	101684527	101684649	123	-	1000	32.2264	5	5	Pik3r1	3UTRs	No_boundary
chr19	5838928	5839011	84	-	1000	32.2264	5	5	Neat1	exons	No_boundary
chr1	43136925	43137071	147	-	1000	32.1443	5	5	Fhl2	introns	No_boundary
chr13	101680939	101680998	60	-	1000	31.9176	5	5	Pik3r1	3UTRs	No_boundary
chr19	5839561	5839593	33	-	1000	31.9106	5	5	Neat1	exons	No_boundary
chr1	135843649	135843730	82	+	1000	31.9089	5	5	Tnnt2	introns	Exon_intron_boundary
chr19	5833779	5833810	32	-	1000	31.8908	5	5	Neat1	exons	No_boundary
chr13	12096914	12097076	163	-	1000	31.7645	5	5	Ryr2	introns	No_boundary
chr14	34577640	34577701	62	-	1000	31.3992	5	5	Ldb3	introns	No_boundary
chr14	34577518	34577612	95	-	1000	31.3916	5	5	Ldb3	introns	Intron_exon_boundary
chr14	54957894	54958043	150	-	1000	31.3765	5	5	Myh6	introns	Exon_intron_boundary
chr19	5838380	5838430	51	-	1000	31.255	5	5	Neat1	exons	No_boundary
chr13	11623267	11623486	220	-	1000	31.225	5	5	Ryr2	introns	No_boundary
chr13	101683690	101683752	63	-	1000	30.7738	5	5	Pik3r1	3UTRs	No_boundary
chr13	12094335	12094436	102	-	1000	30.6496	5	5	Ryr2	introns	No_boundary
chr13	98841657	98841783	127	-	1000	30.4744	5	5	Tnpo1	3UTRs	No_boundary
chr1	135845149	135845208	60	+	1000	30.2855	5	5	Tnnt2	introns	No_boundary
chr14	54951586	54951660	75	-	1000	30.2643	5	5	Myh6	introns	No_boundary
chr14	34576908	34577003	96	-	1000	29.9842	5	5	Ldb3	cds	Exon_intron_boundary
chr13	11624394	11624538	145	-	1000	29.8093	5	5	Ryr2	introns	No_boundary
chr3	137911715	137911823	109	+	1000	29.7924	5	5	Dnajb14	3UTRs	No_boundary
chr14	54966185	54966380	196	-	1000	29.6697	5	5	Myh6	introns	Exon_intron_boundary
chr14	54945521	54945590	70	-	1000	29.4876	5	5	Myh6	introns	No_boundary
chr14	54955640	54955758	119	-	1000	29.4733	5	5	Myh6	introns	No_boundary
chr14	54965113	54965135	23	-	1000	29.3952	5	5	Myh6	introns	Exon_intron_boundary
chr19	5841044	5841224	181	-	1000	29.242	5	5	Neat1	exons	No_boundary
chr17	17528319	17528622	304	-	1000	29.2069	5	5	Lnpep	3UTRs	No_boundary
chr19	5835303	5835351	49	-	1000	28.8882	5	5	Neat1	exons	No_boundary
chr11	88340631	88340793	163	-	1000	28.8365	5	5	Msi2	3UTRs	No_boundary
chr14	34575840	34575909	70	-	1000	28.8243	5	5	Ldb3	introns	No_boundary
chr14	34574729	34574828	100	-	1000	28.7663	5	5	Ldb3	introns	No_boundary
chr13	101683822	101683888	67	-	1000	28.626	5	5	Pik3r1	3UTRs	No_boundary
chr19	5838182	5838209	28	-	1000	28.5701	5	5	Neat1	exons	No_boundary
chr1	135843200	135843266	67	+	1000	28.5441	5	5	Tnnt2	introns	No_boundary
chr14	54944849	54945006	158	-	1000	28.5305	5	5	Myh6	introns	Exon_intron_boundary
chr1	135844905	135844947	43	+	1000	28.4653	5	5	Tnnt2	introns	No_boundary
chr13	12102015	12102149	135	-	1000	28.3453	5	5	Ryr2	introns	No_boundary
chr13	12092748	12093005	258	-	1000	28.1202	5	5	Ryr2	introns	No_boundary
chr1	135843420	135843619	200	+	1000	28.0918	5	5	Tnnt2	introns	Exon_intron_boundary
chr1	131935275	131935364	90	+	1000	28.0581	5	5	Nucks1	3UTRs	No_boundary
chr9	110975889	110976014	126	+	1000	28.0581	5	5	Lrrc2	introns	No_boundary
chr19	5830452	5830544	93	-	1000	28.0144	5	5	Neat1	exons	No_boundary
chr12	54696789	54696805	17	+	1000	27.9767	5	5	NA	exons	Exon_intron_boundary
chr13	12098556	12098675	120	-	1000	27.9478	5	5	Ryr2	introns	No_boundary
chr13	11628545	11628652	108	-	1000	27.878	5	5	Ryr2	introns	No_boundary
chr13	11633299	11633378	80	-	1000	27.878	5	5	Ryr2	introns	No_boundary
chr17	17527942	17528014	73	-	1000	27.8515	5	5	Lnpep	3UTRs	No_boundary
chr13	12096474	12096570	97	-	1000	27.8283	5	5	Ryr2	introns	No_boundary
chr13	12062278	12062441	164	-	1000	27.819	5	5	Ryr2	introns	No_boundary
chr14	34569725	34569746	22	-	1000	27.6313	5	5	Ldb3	introns	No_boundary
chr19	40325223	40325398	176	-	1000	27.5894	5	5	Sorbs1	introns	No_boundary
chr14	54965682	54965710	29	-	1000	27.5442	5	5	Myh6	introns	Exon_intron_boundary
chr19	5829707	5829767	61	-	1000	27.4188	5	5	Neat1	exons	No_boundary
chr14	34578072	34578250	179	-	1000	27.3919	5	5	Ldb3	introns	No_boundary
chr16	37887220	37887291	72	+	1000	27.3375	5	5	Lrrc58	3UTRs	No_boundary
chr1	43139476	43139621	146	-	1000	27.2685	5	5	Fhl2	introns	No_boundary
chr3	123187561	123187693	133	-	1000	27.2657	5	5	Synpo2	introns	No_boundary
chr1	43162526	43162694	169	-	1000	27.2495	5	5	Fhl2	introns	No_boundary
chr13	12097464	12097605	142	-	1000	27.2351	5	5	Ryr2	introns	No_boundary
chr1	135850426	135850441	16	+	1000	27.2132	5	5	Tnnt2	introns	No_boundary
chr10	70009029	70009199	171	+	1000	27.0443	5	5	Ank3	introns	No_boundary
chr13	12091654	12091766	113	-	1000	27.0248	5	5	Ryr2	introns	No_boundary
chr13	12055882	12055996	115	-	1000	26.7237	5	5	Ryr2	introns	No_boundary
chr13	11628212	11628300	89	-	1000	26.7134	5	5	Ryr2	introns	No_boundary
chr13	12105342	12105519	178	-	1000	26.622	5	5	Ryr2	introns	No_boundary
chrX	101655352	101655442	91	+	1000	26.5912	5	5	Ogt	introns	Intron_exon_boundary
chr7	122079217	122079365	149	+	1000	26.5655	5	5	Ubfd1	3UTRs	No_boundary
chr1	135845265	135845505	241	+	1000	26.5186	5	5	Tnnt2	introns	Exon_intron_boundary
chr14	34576597	34576646	50	-	1000	26.4876	5	5	Ldb3	introns	No_boundary
chr6	71391902	71391990	89	-	1000	26.4861	5	5	Rmnd5a	3UTRs	No_boundary
chr19	5801173	5801181	9	-	1000	26.352	5	5	Malat1	exons	No_boundary
chr10	70013623	70013766	144	+	1000	26.2077	5	5	Ank3	introns	No_boundary
chr9	70554655	70554728	74	+	1000	26.1816	5	5	Sltm	introns	No_boundary
chr19	5834867	5834930	64	-	1000	26.1648	5	5	Neat1	exons	No_boundary
chr1	43129033	43129166	134	-	1000	25.8589	5	5	Fhl2	introns	No_boundary
chr7	112848853	112849143	291	+	1000	25.8479	5	5	Tead1	introns	No_boundary
chr1	43140291	43140457	167	-	1000	25.7994	5	5	Fhl2	introns	No_boundary
chr13	12050096	12050225	130	-	1000	25.5982	5	5	Ryr2	introns	No_boundary
chr1	43141075	43141162	88	-	1000	25.5979	5	5	Fhl2	introns	No_boundary
chr19	5827108	5827145	38	-	1000	25.5283	5	5	NA	introns	No_boundary
chr14	34577735	34577865	131	-	1000	25.4731	5	5	Ldb3	introns	No_boundary
chr19	5841433	5841500	68	-	1000	25.4578	5	5	Neat1	exons	No_boundary
chr13	101683129	101683149	21	-	1000	25.442	5	5	Pik3r1	3UTRs	No_boundary
chr19	5839415	5839430	16	-	1000	25.3964	5	5	Neat1	exons	No_boundary
chr14	34577613	34577639	27	-	1000	25.218	5	5	Ldb3	introns	No_boundary
chr1	135843369	135843419	51	+	1000	25.0965	5	5	Tnnt2	introns	No_boundary
chr13	12060326	12060425	100	-	1000	25.0937	5	5	Ryr2	introns	No_boundary
chr1	43129949	43130048	100	-	1000	25.0436	5	5	Fhl2	introns	No_boundary
chr1	43129167	43129362	196	-	1000	25.028	5	5	Fhl2	introns	No_boundary
chr2	155388135	155388269	135	+	1000	25.0234	5	5	Trp53inp2	3UTRs	No_boundary
chr13	12060625	12060789	165	-	1000	24.8435	5	5	Ryr2	introns	No_boundary
chr2	91948161	91948298	138	-	1000	24.6682	5	5	Dgkz	introns	No_boundary
chr13	65300823	65300910	88	+	1000	24.6649	5	5	Zfp369	introns	No_boundary
chr3	123187999	123188106	108	-	1000	24.6649	5	5	Synpo2	introns	No_boundary
chr13	12086471	12086610	140	-	1000	24.636	5	5	Ryr2	introns	No_boundary
chr14	54955543	54955612	70	-	1000	24.6196	5	5	Myh6	introns	No_boundary
chr1	43140562	43140749	188	-	1000	24.6132	5	5	Fhl2	introns	No_boundary
chr3	123188454	123188576	123	-	1000	24.49	5	5	Synpo2	introns	No_boundary
chr7	122080087	122080227	141	+	1000	24.4029	5	5	Ubfd1	3UTRs	No_boundary
chr13	12047244	12047479	236	-	1000	24.3063	5	5	Ryr2	introns	No_boundary
chr19	53757267	53757610	344	+	1000	24.2055	5	5	Rbm20	introns	No_boundary
chr3	31119779	31119873	95	+	1000	24.167	5	5	Skil	3UTRs	No_boundary
chr1	43140050	43140172	123	-	1000	24.1177	5	5	Fhl2	introns	No_boundary
chr13	11810302	11810424	123	-	1000	24.1145	5	5	Ryr2	introns	No_boundary
chr14	54954636	54954765	130	-	1000	24.0779	5	5	Myh6	introns	No_boundary
chr1	43139823	43139983	161	-	1000	24.0391	5	5	Fhl2	introns	No_boundary
chr13	65302380	65302515	136	+	1000	23.9922	5	5	Zfp369	introns	No_boundary
chrX	101655443	101655532	90	+	1000	23.8602	5	5	Ogt	introns	Intron_exon_boundary
chr14	54956145	54956206	62	-	1000	23.8332	5	5	Myh6	introns	No_boundary
chr11	88341333	88341463	131	-	1000	23.8258	5	5	Msi2	3UTRs	No_boundary
chr6	118752426	118752539	114	-	1000	23.7422	5	5	Cacna1c	introns	No_boundary
chr10	63873755	63873851	97	+	1000	23.6349	5	5	Ctnna3	introns	No_boundary
chr17	17528144	17528204	61	-	1000	23.4212	5	5	Lnpep	3UTRs	No_boundary
chr14	54959662	54959697	36	-	1000	23.3841	5	5	Myh6	introns	Exon_intron_boundary
chr3	123169777	123169897	121	-	1000	23.2405	5	5	Synpo2	introns	No_boundary
chr7	81605914	81606029	116	-	1000	23.2252	5	5	Homer2	3UTRs	No_boundary
chr13	101683071	101683115	45	-	1000	23.0141	5	5	Pik3r1	3UTRs	No_boundary
chr19	53756524	53756574	51	+	1000	22.9723	5	5	Rbm20	introns	No_boundary
chr17	32771265	32771496	232	-	1000	22.9537	5	5	Zfp871	3UTRs	No_boundary
chr1	135843000	135843051	52	+	1000	22.9314	5	5	Tnnt2	introns	No_boundary
chr13	12096679	12096804	126	-	1000	22.8887	5	5	Ryr2	introns	No_boundary
chr1	131935367	131935592	226	+	1000	22.7178	5	5	Nucks1	3UTRs	No_boundary
chr13	65301727	65301826	100	+	1000	22.7025	5	5	Zfp369	introns	No_boundary
chr1	189892330	189892471	142	-	1000	22.7005	5	5	Smyd2	introns	No_boundary
chrX	101654621	101654846	226	+	1000	22.6892	5	5	Ogt	introns	No_boundary
chr13	11628095	11628165	71	-	1000	22.6333	5	5	Ryr2	introns	No_boundary
chr13	12098077	12098433	357	-	1000	22.51	5	5	Ryr2	introns	No_boundary
chr7	122080534	122080668	135	+	1000	22.4189	5	5	Ubfd1	3UTRs	No_boundary
chr3	97727286	97727421	136	-	1000	22.3799	5	5	Pde4dip	introns	No_boundary
chr14	54951482	54951585	104	-	1000	22.3615	5	5	Myh6	introns	No_boundary
chr14	54945609	54945736	128	-	1000	22.3423	5	5	Myh6	introns	No_boundary
chr19	53798166	53798296	131	+	1000	22.2953	5	5	Rbm20	introns	No_boundary
chr3	123170075	123170251	177	-	1000	22.2562	5	5	Synpo2	introns	No_boundary
chr6	71392486	71392607	122	-	1000	22.227	5	5	Rmnd5a	3UTRs	No_boundary
chr7	81066504	81066607	104	+	1000	22.2233	5	5	Alpk3	introns	No_boundary
chr10	70012994	70013085	92	+	1000	22.206	5	5	Ank3	introns	No_boundary
chr3	123189183	123189324	142	-	1000	22.206	5	5	Synpo2	introns	No_boundary
chr13	12066388	12066521	134	-	1000	22.1096	5	5	Ryr2	introns	No_boundary
chr1	43137426	43137443	18	-	1000	22.1063	5	5	Fhl2	introns	No_boundary
chr7	81066868	81067086	219	+	1000	22.0749	5	5	Alpk3	introns	No_boundary
chr1	135843731	135843814	84	+	1000	22.054	5	5	Tnnt2	cds	Exon_intron_boundary
chr13	11627598	11627668	71	-	1000	22.0536	5	5	Ryr2	introns	No_boundary
chr11	59015115	59015393	279	-	1000	22.0504	5	5	Obscn	introns	No_boundary
chr11	59066371	59066822	452	-	1000	22.0043	5	5	Obscn	introns	No_boundary
chr13	12055313	12055428	116	-	1000	21.9272	5	5	Ryr2	introns	No_boundary
chr1	43133322	43133566	245	-	1000	21.9237	5	5	Fhl2	introns	No_boundary
chr15	90228535	90228675	141	+	1000	21.8361	5	5	Alg10b	3UTRs	No_boundary
chr3	123230773	123231113	341	-	1000	21.825	5	5	Synpo2	introns	No_boundary
chr13	12091409	12091568	160	-	1000	21.7663	5	5	Ryr2	introns	No_boundary
chr7	122079005	122079068	64	+	1000	21.689	5	5	Ubfd1	3UTRs	No_boundary
chr2	37374575	37374673	99	-	1000	21.6862	5	5	Rc3h2	3UTRs	No_boundary
chr14	54976959	54977009	51	+	1000	21.6574	5	5	NA	cds	Exon_intron_boundary
chr1	43138537	43138739	203	-	1000	21.654	5	5	Fhl2	introns	No_boundary
chr13	12010550	12010680	131	-	1000	21.6265	5	5	Ryr2	introns	No_boundary
chr13	11634923	11635004	82	-	1000	21.6264	5	5	Ryr2	introns	No_boundary
chr13	65301264	65301413	150	+	1000	21.6029	5	5	Zfp369	introns	No_boundary
chr1	43137762	43138045	284	-	1000	21.5881	5	5	Fhl2	introns	No_boundary
chr4	130309599	130309778	180	+	1000	21.5854	5	5	Fabp3	introns	No_boundary
chr16	37882236	37882331	96	+	1000	21.5203	5	5	Lrrc58	3UTRs	No_boundary
chr3	102092275	102092445	171	+	1000	21.3761	5	5	Casq2	introns	No_boundary
chr14	54946184	54946217	34	-	1000	21.362	5	5	Myh6	introns	Exon_intron_boundary
chr13	12094256	12094334	79	-	1000	21.3446	5	5	Ryr2	introns	No_boundary
chr3	123186247	123186425	179	-	1000	21.3274	5	5	Synpo2	introns	No_boundary
chr16	8849632	8849755	124	+	1000	21.3126	5	5	1810013L24Rik	introns	No_boundary
chr2	155387224	155387302	79	+	1000	21.2581	5	5	Trp53inp2	3UTRs	No_boundary
chr13	12061833	12061944	112	-	1000	20.9236	5	5	Ryr2	introns	No_boundary
chr16	37886186	37886322	137	+	1000	20.9007	5	5	Lrrc58	3UTRs	No_boundary
chr13	98841191	98841304	114	-	1000	20.8594	5	5	Tnpo1	3UTRs	No_boundary
chr1	43131001	43131314	314	-	1000	20.837	5	5	Fhl2	introns	No_boundary
chr13	12096369	12096473	105	-	1000	20.8333	5	5	Ryr2	introns	No_boundary
chr13	12100003	12100179	177	-	1000	20.8197	5	5	Ryr2	introns	No_boundary
chr2	155388566	155388858	293	+	1000	20.8105	5	5	Trp53inp2	3UTRs	No_boundary
chr1	43130386	43130494	109	-	1000	20.7588	5	5	Fhl2	introns	No_boundary
chr13	11630434	11630590	157	-	1000	20.7468	5	5	Ryr2	introns	No_boundary
chr10	63875593	63875753	161	+	1000	20.6811	5	5	Ctnna3	introns	No_boundary
chr12	103342848	103343036	189	-	1000	20.6791	5	5	Asb2	introns	No_boundary
chr14	54945591	54945608	18	-	1000	20.647	5	5	Myh6	introns	No_boundary
chr13	12061000	12061072	73	-	1000	20.6425	5	5	Ryr2	introns	No_boundary
chr1	43131315	43131652	338	-	1000	20.6164	5	5	Fhl2	introns	Exon_intron_boundary
chr13	12101431	12101517	87	-	1000	20.49	5	5	Ryr2	introns	No_boundary
chr16	37886789	37886830	42	+	1000	20.4165	5	5	Lrrc58	3UTRs	No_boundary
chr19	53754450	53754543	94	+	1000	20.3782	5	5	Rbm20	introns	No_boundary
chr19	5828706	5828771	66	-	1000	20.3154	5	5	Neat1	exons	No_boundary
chr13	12091325	12091408	84	-	1000	20.2524	5	5	Ryr2	introns	No_boundary
chr1	43137216	43137425	210	-	1000	20.2041	5	5	Fhl2	introns	No_boundary
chr13	32704830	32704966	137	-	1000	20.1915	5	5	Mylk4	3UTRs	No_boundary
chr13	11627517	11627566	50	-	1000	20.1527	5	5	Ryr2	introns	No_boundary
chr13	98842462	98842546	85	-	1000	20.1527	5	5	Tnpo1	3UTRs	No_boundary
chr14	54959698	54959767	70	-	1000	19.8159	5	5	Myh6	introns	Exon_intron_boundary
chr10	70012359	70012457	99	+	1000	19.7896	5	5	Ank3	introns	No_boundary
chr1	189893618	189893746	129	-	1000	19.7367	5	5	Smyd2	introns	No_boundary
chr13	12049800	12050013	214	-	1000	19.6203	5	5	Ryr2	introns	No_boundary
chr1	135850496	135850611	116	+	1000	19.6189	5	5	Tnnt2	introns	Intron_exon_boundary
chr13	12050226	12050328	103	-	1000	19.6007	5	5	Ryr2	introns	No_boundary
chr13	12104906	12104994	89	-	1000	19.4947	5	5	Ryr2	introns	No_boundary
chr8	79675027	79675237	211	+	1000	19.4889	5	5	Otud4	3UTRs	No_boundary
chr9	110976064	110976185	122	+	1000	19.488	5	5	Lrrc2	introns	No_boundary
chr2	155388438	155388521	84	+	1000	19.4413	5	5	Trp53inp2	3UTRs	No_boundary
chr18	36290483	36290746	264	+	1000	19.3736	5	5	Pura	3UTRs	No_boundary
chr13	12054273	12054365	93	-	1000	19.3591	5	5	Ryr2	introns	No_boundary
chr8	79677194	79677329	136	+	1000	19.3426	5	5	Otud4	3UTRs	No_boundary
chr1	43141273	43141561	289	-	1000	19.3193	5	5	Fhl2	introns	Exon_intron_boundary
chr13	12095087	12095206	120	-	1000	19.2992	5	5	Ryr2	introns	No_boundary
chr13	12058693	12058878	186	-	1000	19.2894	5	5	Ryr2	introns	No_boundary
chr6	118754399	118754619	221	-	1000	19.2894	5	5	Cacna1c	introns	No_boundary
chr3	123186601	123186703	103	-	1000	19.2833	5	5	Synpo2	introns	No_boundary
chr11	59063676	59063784	109	-	1000	19.2372	5	5	Obscn	cds	Intron_exon_boundary
chr14	34569830	34569871	42	-	1000	19.1858	5	5	Ldb3	introns	No_boundary
chr14	54954247	54954354	108	-	1000	18.9068	5	5	Myh6	introns	No_boundary
chr19	40333064	40333211	148	-	1000	18.9008	5	5	Sorbs1	introns	No_boundary
chr1	43138137	43138254	118	-	1000	18.88	5	5	Fhl2	introns	No_boundary
chr16	37884502	37884591	90	+	1000	18.8451	5	5	Lrrc58	3UTRs	No_boundary
chr13	65302048	65302140	93	+	1000	18.8087	5	5	Zfp369	introns	No_boundary
chr3	137913201	137913295	95	+	1000	18.8087	5	5	Dnajb14	3UTRs	No_boundary
chr14	54955628	54955639	12	-	1000	18.7218	5	5	Myh6	introns	No_boundary
chr7	122080938	122081143	206	+	1000	18.6907	5	5	Ubfd1	3UTRs	No_boundary
chr13	11629505	11629543	39	-	1000	18.6276	5	5	Ryr2	introns	No_boundary
chr13	32702164	32702334	171	-	1000	18.5956	5	5	Mylk4	3UTRs	No_boundary
chr8	46210621	46210761	141	-	1000	18.4881	5	5	Slc25a4	introns	Exon_intron_boundary
chr16	37887085	37887209	125	+	1000	18.4469	5	5	Lrrc58	3UTRs	No_boundary
chr18	24724596	24724742	147	+	1000	18.3793	5	5	Fhod3	introns	No_boundary
chr9	67032494	67032610	117	-	1000	18.3793	5	5	Tpm1	cds	Exon_intron_boundary
chr16	57396411	57396571	161	+	1000	18.3413	5	5	Filip1l	introns	No_boundary
chr13	12057568	12057646	79	-	1000	18.3046	5	5	Ryr2	introns	No_boundary
chr13	12061743	12061832	90	-	1000	18.1593	5	5	Ryr2	introns	No_boundary
chr19	53755713	53755805	93	+	1000	18.0923	5	5	Rbm20	introns	No_boundary
chr13	11675996	11676127	132	-	1000	18.0173	5	5	Ryr2	introns	Exon_intron_boundary
chr13	12064346	12064428	83	-	1000	18.0173	5	5	Ryr2	introns	No_boundary
chr14	34574829	34574905	77	-	1000	17.9901	5	5	Ldb3	introns	No_boundary
chr19	40319749	40319904	156	-	1000	17.959	5	5	Sorbs1	introns	No_boundary
chr13	12012570	12012676	107	-	1000	17.9367	5	5	Ryr2	introns	No_boundary
chr6	118633924	118634247	324	-	1000	17.9275	4.98	5	Cacna1c	introns	No_boundary
chr2	155389092	155389163	72	+	1000	17.8719	5	5	Trp53inp2	3UTRs	No_boundary
chr13	12004519	12004681	163	-	1000	17.825	5	5	Ryr2	introns	No_boundary
chr7	112898833	112899004	172	+	1000	17.8192	5	5	Tead1	3UTRs	No_boundary
chr19	53684267	53684404	138	+	1000	17.8178	5	5	Rbm20	introns	No_boundary
chr6	118754040	118754244	205	-	1000	17.7932	5	5	Cacna1c	introns	No_boundary
chr11	35330445	35330550	106	+	1000	17.7872	5	5	Slit3	introns	No_boundary
chr2	155387675	155387862	188	+	1000	17.776	5	5	Trp53inp2	3UTRs	No_boundary
chr7	81066340	81066478	139	+	1000	17.7633	5	5	Alpk3	introns	No_boundary
chr15	27491012	27491146	135	+	1000	17.745	5	5	Ank	introns	No_boundary
chr2	155388289	155388412	124	+	1000	17.7077	5	5	Trp53inp2	3UTRs	No_boundary
chr1	43163362	43163547	186	-	1000	17.699	5	5	Fhl2	introns	Exon_intron_boundary
chr1	135843836	135844013	178	+	1000	17.6646	5	5	Tnnt2	introns	Exon_intron_boundary
chr2	11722663	11722827	165	+	1000	17.6201	5	5	Il15ra	introns	No_boundary
chr13	12076230	12076333	104	-	1000	17.5821	5	5	Ryr2	introns	No_boundary
chr5	125442211	125442353	143	+	1000	17.5768	5	5	Bri3bp	introns	No_boundary
chr14	54965971	54966049	79	-	1000	17.5554	5	5	Myh6	introns	Intron_exon_boundary
chr13	12059924	12060263	340	-	1000	17.5449	5	5	Ryr2	introns	No_boundary
chr2	104429193	104429395	203	-	1000	17.5338	5	5	Hipk3	3UTRs	No_boundary
chr11	59063822	59063916	95	-	1000	17.5209	4.95	5	Obscn	introns	Intron_exon_boundary
chr19	53759090	53759241	152	+	1000	17.4729	5	5	Rbm20	introns	No_boundary
chr10	63873596	63873679	84	+	1000	17.4329	5	5	Ctnna3	introns	No_boundary
chr10	95309844	95309971	128	-	1000	17.4329	5	5	Cradd	introns	No_boundary
chr1	135837105	135837175	71	+	1000	17.4146	5	5	Tnnt2	introns	No_boundary
chr13	12092465	12092688	224	-	1000	17.4071	5	5	Ryr2	introns	No_boundary
chr9	66064970	66065091	122	+	1000	17.393	5	5	Ppib	introns	No_boundary
chr19	53743522	53743659	138	+	1000	17.374	5	5	Rbm20	introns	No_boundary
chr10	64046399	64046566	168	+	1000	17.3609	5	5	Ctnna3	introns	No_boundary
chr13	12048094	12048183	90	-	1000	17.3104	4.91	5	Ryr2	introns	No_boundary
chr19	53756575	53757085	511	+	1000	17.2491	5	5	Rbm20	introns	No_boundary
chr19	40311336	40311495	160	-	1000	17.1841	5	5	Sorbs1	introns	Exon_intron_boundary
chr19	53753461	53753528	68	+	1000	17.1639	5	5	Rbm20	introns	No_boundary
chr13	12030540	12030756	217	-	1000	17.1384	4.95	5	Ryr2	introns	No_boundary
chr13	12097324	12097403	80	-	1000	17.0953	5	5	Ryr2	introns	No_boundary
chr1	135850612	135850713	102	+	1000	17.0928	5	5	Tnnt2	introns	Exon_intron_boundary
chr9	110974870	110974976	107	+	1000	17.0456	5	5	Lrrc2	introns	No_boundary
chr18	24724347	24724506	160	+	1000	17.0001	5	5	Fhod3	introns	No_boundary
chr1	131935634	131935812	179	+	1000	16.9749	4.88	5	Nucks1	3UTRs	No_boundary
chr19	53758412	53758527	116	+	1000	16.8604	5	5	Rbm20	introns	No_boundary
chr7	81064070	81064307	238	+	1000	16.8604	5	5	Alpk3	introns	Exon_intron_boundary
chr11	77711133	77711257	125	+	1000	16.8465	5	5	Nufip2	3UTRs	No_boundary
chr10	63873852	63873998	147	+	1000	16.8372	4.98	5	Ctnna3	introns	No_boundary
chr13	12105623	12105725	103	-	1000	16.8362	5	5	Ryr2	introns	No_boundary
chr17	23823535	23823655	121	+	1000	16.7894	4.94	5	Srrm2	introns	Intron_exon_boundary
chrX	101654363	101654439	77	+	1000	16.7828	5	5	Ogt	introns	No_boundary
chr1	143601337	143601513	177	-	1000	16.7467	4.98	5	Cdc73	3UTRs	No_boundary
chr3	97729154	97729305	152	-	1000	16.7467	5	5	Pde4dip	introns	No_boundary
chr19	40330426	40330616	191	-	1000	16.741	5	5	Sorbs1	introns	No_boundary
chr16	37886936	37887008	73	+	1000	16.718	5	5	Lrrc58	3UTRs	No_boundary
chr1	189894540	189894664	125	-	1000	16.71	5	5	Smyd2	introns	No_boundary
chr7	122079822	122080086	265	+	1000	16.6952	5	5	Ubfd1	3UTRs	No_boundary
chr3	123167237	123167344	108	-	1000	16.6484	4.86	5	Synpo2	introns	No_boundary
chr13	12060833	12060920	88	-	1000	16.6331	5	5	Ryr2	introns	No_boundary
chr3	137911831	137911910	80	+	1000	16.6274	5	5	Dnajb14	3UTRs	No_boundary
chr2	155387332	155387674	343	+	1000	16.6154	5	5	Trp53inp2	3UTRs	No_boundary
chr13	12047895	12048017	123	-	1000	16.5931	5	5	Ryr2	introns	No_boundary
chr3	123168476	123168570	95	-	1000	16.581	5	5	Synpo2	introns	No_boundary
chr13	12065193	12065258	66	-	1000	16.5678	5	5	Ryr2	introns	No_boundary
chr7	112906121	112906306	186	+	1000	16.5678	5	5	Tead1	3UTRs	No_boundary
chr7	112905508	112905686	179	+	1000	16.5399	5	5	Tead1	3UTRs	No_boundary
chr16	37883752	37883828	77	+	1000	16.4427	5	5	Lrrc58	3UTRs	No_boundary
chr13	12098434	12098555	122	-	1000	16.433	5	5	Ryr2	introns	No_boundary
chr1	43160583	43160704	122	-	1000	16.4287	5	5	Fhl2	introns	No_boundary
chr13	32701548	32701629	82	-	1000	16.4284	5	5	Mylk4	3UTRs	No_boundary
chr1	43130741	43130848	108	-	1000	16.3761	5	5	Fhl2	introns	No_boundary
chr11	35330063	35330241	179	+	1000	16.3494	5	5	Slit3	introns	No_boundary
chr1	43133073	43133229	157	-	1000	16.3139	5	5	Fhl2	introns	No_boundary
chr19	53759934	53760021	88	+	1000	16.2985	5	5	Rbm20	introns	No_boundary
chr7	112901931	112902387	457	+	1000	16.2606	5	5	Tead1	3UTRs	No_boundary
chr13	12047771	12047876	106	-	1000	16.2393	4.82	5	Ryr2	introns	No_boundary
chr7	112899791	112899965	175	+	1000	16.2356	4.83	5	Tead1	3UTRs	No_boundary
chr11	77711805	77711896	92	+	1000	16.2169	5	5	Nufip2	3UTRs	No_boundary
chr13	12046035	12046195	161	-	1000	16.2169	5	5	Ryr2	introns	No_boundary
chr17	17529289	17529469	181	-	1000	16.1995	5	5	Lnpep	3UTRs	No_boundary
chr13	12098772	12099041	270	-	1000	16.1702	5	5	Ryr2	introns	No_boundary
chr19	40373784	40373951	168	-	1000	16.1432	5	5	Sorbs1	introns	Intron_exon_boundary
chr13	12057167	12057243	77	-	1000	16.1362	5	5	Ryr2	introns	No_boundary
chr10	95307663	95307943	281	-	1000	16.1083	5	5	Cradd	introns	No_boundary
chrX	42105223	42105356	134	+	1000	16.1071	5	5	Xiap	3UTRs	No_boundary
chr13	32701826	32702012	187	-	1000	16.0447	5	5	Mylk4	3UTRs	No_boundary
chr3	102093630	102093769	140	+	1000	15.9579	5	5	Casq2	introns	No_boundary
chr19	53800553	53800667	115	+	1000	15.9541	5	5	Rbm20	introns	No_boundary
chr14	54946536	54946598	63	-	1000	15.9276	5	5	Myh6	introns	Intron_exon_boundary
chr13	98842358	98842446	89	-	1000	15.8997	4.95	5	Tnpo1	3UTRs	No_boundary
chr13	12066796	12066908	113	-	1000	15.8918	5	5	Ryr2	introns	No_boundary
chr7	112903821	112903953	133	+	1000	15.8883	4.98	5	Tead1	3UTRs	No_boundary
chr13	12039813	12039909	97	-	1000	15.8821	5	5	Ryr2	introns	No_boundary
chr13	12091767	12091915	149	-	1000	15.8604	5	5	Ryr2	introns	No_boundary
chr10	63871125	63871245	121	+	1000	15.8588	4.95	5	Ctnna3	introns	No_boundary
chr16	57470354	57470500	147	+	1000	15.8471	4.92	5	Filip1l	introns	No_boundary
chr13	12015605	12015706	102	-	1000	15.8424	5	5	Ryr2	introns	No_boundary
chr6	71389053	71389296	244	-	1000	15.7901	4.85	5	Rmnd5a	3UTRs	No_boundary
chr13	101739083	101739202	120	-	1000	15.7165	5	5	Pik3r1	introns	No_boundary
chr3	31120378	31120528	151	+	1000	15.7165	4.99	5	Skil	3UTRs	No_boundary
chr3	102094006	102094129	124	+	1000	15.7165	4.8	5	Casq2	introns	No_boundary
chr1	43138740	43139050	311	-	1000	15.7084	5	5	Fhl2	introns	No_boundary
chr13	108458420	108458565	146	+	1000	15.707	5	5	Pde4d	introns	No_boundary
chr10	95309183	95309295	113	-	1000	15.6885	5	5	Cradd	introns	No_boundary
chr11	77542824	77542954	131	-	1000	15.6885	5	5	Taok1	introns	No_boundary
chr19	53820781	53820880	100	+	1000	15.6885	5	5	Rbm20	introns	No_boundary
chr6	71389365	71389518	154	-	1000	15.661	4.9	5	Rmnd5a	3UTRs	No_boundary
chr19	53749476	53749561	86	+	1000	15.6024	5	5	Rbm20	introns	No_boundary
chr13	12093334	12093400	67	-	1000	15.5881	5	5	Ryr2	introns	No_boundary
chr18	36291066	36291172	107	+	1000	15.5693	4.8	5	Pura	3UTRs	No_boundary
chr13	32703088	32703209	122	-	1000	15.5578	5	5	Mylk4	3UTRs	No_boundary
chr2	37372520	37372680	161	-	1000	15.552	5	5	Rc3h2	3UTRs	No_boundary
chr1	43130849	43130961	113	-	1000	15.5171	5	5	Fhl2	introns	No_boundary
chr19	40309265	40309419	155	-	1000	15.5082	4.99	5	Sorbs1	introns	No_boundary
chr13	32702607	32702733	127	-	1000	15.4905	5	5	Mylk4	3UTRs	No_boundary
chr10	95310077	95310162	86	-	1000	15.433	4.87	5	Cradd	introns	No_boundary
chr3	137912129	137912282	154	+	1000	15.433	4.84	5	Dnajb14	3UTRs	No_boundary
chr3	137914010	137914088	79	+	1000	15.433	4.88	5	Dnajb14	3UTRs	No_boundary
chr13	11620453	11620494	42	-	1000	15.4319	5	5	Ryr2	introns	No_boundary
chr19	53678183	53678293	111	+	1000	15.4215	5	5	Rbm20	introns	No_boundary
chr4	116365134	116365311	178	-	1000	15.3923	4.82	5	Mast2	introns	No_boundary
chr6	36462859	36462996	138	+	1000	15.3682	4.88	5	Chrm2	introns	No_boundary
chr13	32701689	32701808	120	-	1000	15.3562	5	5	Mylk4	3UTRs	No_boundary
chr19	53757720	53758004	285	+	1000	15.3562	5	5	Rbm20	introns	No_boundary
chr11	59064618	59064904	287	-	1000	15.3549	5	5	Obscn	introns	Intron_exon_boundary
chr13	11806107	11806325	219	-	1000	15.3322	5	5	Ryr2	introns	No_boundary
chr6	118753165	118753466	302	-	1000	15.3077	5	5	Cacna1c	introns	No_boundary
chr11	59057360	59057507	148	-	1000	15.304	5	5	Obscn	introns	No_boundary
chr19	53758108	53758175	68	+	1000	15.3003	5	5	Rbm20	introns	No_boundary
chr11	59064365	59064557	193	-	1000	15.2895	5	5	Obscn	cds	Exon_intron_boundary
chr11	59066206	59066370	165	-	1000	15.2772	5	5	Obscn	introns	No_boundary
chr6	118637366	118637497	132	-	1000	15.2704	4.9	5	Cacna1c	introns	No_boundary
chr5	122103325	122103446	122	+	1000	15.2685	5	5	Myl2	introns	No_boundary
chr6	14729742	14729834	93	-	1000	15.2615	5	5	Ppp1r3a	introns	No_boundary
chr6	120947889	120947995	107	-	1000	15.172	4.95	5	Mical3	introns	No_boundary
chr6	118753056	118753136	81	-	1000	15.1226	5	5	Cacna1c	introns	No_boundary
chr6	120949874	120949996	123	-	1000	15.1226	5	5	Mical3	introns	No_boundary
chr7	81605350	81605439	90	-	1000	15.1226	4.99	5	Homer2	3UTRs	No_boundary
chr13	108726938	108727092	155	+	1000	15.0392	4.83	5	Pde4d	introns	No_boundary
chr14	54957832	54957856	25	-	1000	15.0368	5	5	Myh6	introns	Exon_intron_boundary
chr12	103338350	103338476	127	-	1000	15.0364	5	5	Asb2	5UTRs	Intron_exon_boundary
chrX	42107192	42107304	113	+	1000	15.0292	5	5	Xiap	3UTRs	No_boundary
chr13	12038745	12038852	108	-	1000	15.0203	5	5	Ryr2	introns	No_boundary
chr9	110764074	110764139	66	+	1000	15.0132	5	5	Myl3	introns	Exon_intron_boundary
chr14	101886339	101886749	411	+	1000	14.982	4.93	5	Lmo7	introns	Intron_exon_boundary
chr1	43128597	43128706	110	-	1000	14.9455	5	5	Fhl2	introns	Intron_exon_boundary
chr13	12079481	12079568	88	-	1000	14.9455	5	5	Ryr2	introns	No_boundary
chr14	34578544	34578571	28	-	1000	14.9272	5	5	Ldb3	introns	Exon_intron_boundary
chr1	143606516	143606651	136	-	1000	14.9213	5	5	Cdc73	3UTRs	No_boundary
chr13	12057670	12057776	107	-	1000	14.91	5	5	Ryr2	introns	No_boundary
chr3	123168998	123169255	258	-	1000	14.9054	5	5	Synpo2	introns	No_boundary
chr1	43160835	43160911	77	-	1000	14.8886	5	5	Fhl2	introns	No_boundary
chr3	97691481	97691706	226	-	1000	14.8865	5	5	Pde4dip	introns	No_boundary
chr13	12073673	12073775	103	-	1000	14.8735	5	5	Ryr2	introns	No_boundary
chr19	53757094	53757266	173	+	1000	14.8722	5	5	Rbm20	introns	No_boundary
chr13	12099230	12099293	64	-	1000	14.8661	5	5	Ryr2	introns	No_boundary
chr13	12095664	12095721	58	-	1000	14.8619	5	5	Ryr2	introns	No_boundary
chr1	43158626	43158712	87	-	1000	14.8398	5	5	Fhl2	introns	No_boundary
chr13	11689546	11689646	101	-	1000	14.8061	5	5	Ryr2	introns	No_boundary
chr14	54955336	54955410	75	-	1000	14.7945	5	5	Myh6	introns	No_boundary
chr3	97730459	97730673	215	-	1000	14.7696	5	5	Pde4dip	introns	Exon_intron_boundary
chr15	90230040	90230165	126	+	1000	14.7577	4.98	5	Alg10b	3UTRs	No_boundary
chr8	61643762	61643933	172	-	1000	14.7548	5	5	Palld	introns	No_boundary
chr8	71571113	71571238	126	+	1000	14.6907	5	5	Slc27a1	introns	No_boundary
chr13	65302239	65302332	94	+	1000	14.6718	4.76	5	Zfp369	introns	No_boundary
chr14	101592978	101593153	176	-	1000	14.6631	4.7	5	Tbc1d4	introns	No_boundary
chr7	122079427	122079566	140	+	1000	14.662	4.82	5	Ubfd1	3UTRs	No_boundary
chr1	131933932	131934037	106	+	1000	14.657	5	5	Nucks1	3UTRs	No_boundary
chr13	98842926	98843104	179	-	1000	14.6504	4.79	5	Tnpo1	3UTRs	No_boundary
chr7	112905819	112905916	98	+	1000	14.6415	5	5	Tead1	3UTRs	No_boundary
chr16	57469965	57470131	167	+	1000	14.633	5	5	Filip1l	introns	No_boundary
chr16	37886721	37886788	68	+	1000	14.593	5	5	Lrrc58	3UTRs	No_boundary
chr6	118749293	118749386	94	-	1000	14.5688	4.67	5	Cacna1c	introns	No_boundary
chr13	108455018	108455133	116	+	1000	14.5483	4.72	5	Pde4d	introns	No_boundary
chr6	118748937	118749018	82	-	1000	14.5079	5	5	Cacna1c	introns	No_boundary
chr6	118632437	118632528	92	-	1000	14.4615	4.7	5	Cacna1c	introns	No_boundary
chr14	54949091	54949133	43	-	1000	14.4562	5	5	Myh6	introns	No_boundary
chr13	12078029	12078077	49	-	1000	14.4486	4.68	5	Ryr2	introns	No_boundary
chr15	90230166	90230286	121	+	1000	14.4453	4.8	5	Alg10b	3UTRs	No_boundary
chr4	118403321	118403472	152	-	1000	14.4256	5	5	Szt2	introns	No_boundary
chr9	77331641	77331791	151	-	1000	14.4256	5	5	Mlip	introns	No_boundary
chr8	79674638	79674800	163	+	1000	14.4249	5	5	Otud4	3UTRs	No_boundary
chr13	12097212	12097287	76	-	1000	14.422	5	5	Ryr2	introns	No_boundary
chr12	103340313	103340498	186	-	1000	14.4203	5	5	Asb2	introns	No_boundary
chr1	168154712	168154854	143	-	1000	14.4023	5	5	Pbx1	3UTRs	No_boundary
chr19	53699887	53699997	111	+	1000	14.3615	5	5	Rbm20	introns	No_boundary
chr16	37888762	37888828	67	+	1000	14.3563	5	5	Lrrc58	3UTRs	Exon_intron_boundary
chr19	53829039	53829219	181	+	1000	14.3244	4.74	5	Rbm20	introns	No_boundary
chr11	65176814	65177080	267	-	1000	14.3082	4.87	5	Myocd	3UTRs	No_boundary
chr13	12103168	12103246	79	-	1000	14.3044	5	5	Ryr2	introns	No_boundary
chr1	134804520	134804671	152	-	1000	14.3039	5	5	Ppp1r12b	introns	No_boundary
chr13	12102743	12102864	122	-	1000	14.2891	5	5	Ryr2	introns	No_boundary
chr14	34527691	34527777	87	-	1000	14.2752	5	5	Ldb3	3UTRs	No_boundary
chr13	12083419	12083489	71	-	1000	14.273	5	5	Ryr2	introns	No_boundary
chr1	43140852	43141061	210	-	1000	14.2658	5	5	Fhl2	introns	No_boundary
chr11	65177234	65177433	200	-	1000	14.2573	5	5	Myocd	3UTRs	No_boundary
chr11	88340330	88340437	108	-	1000	14.2561	5	5	Msi2	3UTRs	No_boundary
chr17	32772663	32772834	172	-	1000	14.1761	5	5	Zfp871	3UTRs	No_boundary
chr9	68750886	68751013	128	+	1000	14.1748	4.94	5	Rora	introns	No_boundary
chr17	23823656	23823864	209	+	1000	14.1736	5	5	Srrm2	cds	Exon_intron_boundary
chr17	71081388	71081536	149	+	1000	14.1648	4.66	5	Myom1	introns	No_boundary
chr10	63873075	63873370	296	+	1000	14.1468	4.69	5	Ctnna3	introns	No_boundary
chr13	11806326	11806487	162	-	1000	14.1468	4.75	5	Ryr2	introns	No_boundary
chr13	12068272	12068367	96	-	1000	14.135	5	5	Ryr2	introns	No_boundary
chr12	103340529	103340878	350	-	1000	14.0592	4.83	5	Asb2	introns	No_boundary
chr13	12055495	12055558	64	-	1000	14.0547	4.72	5	Ryr2	introns	No_boundary
chr4	130309163	130309432	270	+	1000	14.0366	5	5	Fabp3	introns	No_boundary
chr13	98839611	98839704	94	-	1000	14.0278	4.83	5	Tnpo1	3UTRs	No_boundary
chr3	97730011	97730155	145	-	1000	14.0278	4.68	5	Pde4dip	introns	No_boundary
chr19	53747899	53748004	106	+	1000	14.0025	5	5	Rbm20	introns	No_boundary
chr7	112905359	112905428	70	+	1000	13.9704	5	5	Tead1	3UTRs	No_boundary
chr13	12090472	12090539	68	-	1000	13.9665	5	5	Ryr2	introns	No_boundary
chr8	61808394	61808678	285	-	1000	13.964	4.75	5	Palld	introns	No_boundary
chr19	53764729	53764818	90	+	1000	13.936	4.98	5	Rbm20	introns	No_boundary
chr14	54955449	54955511	63	-	1000	13.9357	5	5	Myh6	introns	No_boundary
chr1	43136011	43136259	249	-	1000	13.9136	5	5	Fhl2	introns	No_boundary
chr1	135842390	135842471	82	+	1000	13.9018	5	5	Tnnt2	introns	No_boundary
chr1	143606880	143606975	96	-	1000	13.8876	4.97	5	Cdc73	3UTRs	No_boundary
chr3	137910570	137910693	124	+	1000	13.8796	4.92	5	Dnajb14	3UTRs	No_boundary
chr13	12101611	12101815	205	-	1000	13.8686	5	5	Ryr2	introns	No_boundary
chr7	81066216	81066310	95	+	1000	13.853	5	5	Alpk3	introns	No_boundary
chr2	155389642	155389739	98	+	1000	13.8503	5	5	Trp53inp2	3UTRs	Exon_intron_boundary
chr6	118752048	118752425	378	-	1000	13.8272	5	5	Cacna1c	introns	No_boundary
chr7	122079582	122079713	132	+	1000	13.8264	5	5	Ubfd1	3UTRs	No_boundary
chr17	26774773	26774943	171	+	1000	13.8212	5	5	Crebrf	3UTRs	No_boundary
chr5	66984183	66984374	192	+	1000	13.8056	5	5	Limch1	introns	No_boundary
chr13	108455672	108455797	126	+	1000	13.7071	4.62	5	Pde4d	introns	No_boundary
chr17	26774222	26774331	110	+	1000	13.7071	4.79	5	Crebrf	3UTRs	No_boundary
chr3	123188220	123188307	88	-	1000	13.7071	5	5	Synpo2	introns	No_boundary
chr3	102121828	102122080	253	+	1000	13.7027	5	5	Casq2	introns	No_boundary
chr5	72383620	72383887	268	-	1000	13.6908	4.67	5	Corin	introns	No_boundary
chr13	12061610	12061670	61	-	1000	13.6761	5	5	Ryr2	introns	No_boundary
chr1	143607217	143607324	108	-	1000	13.6506	4.8	5	Cdc73	3UTRs	No_boundary
chr13	65301064	65301140	77	+	1000	13.6506	5	5	Zfp369	introns	No_boundary
chr13	12095262	12095331	70	-	1000	13.6142	5	5	Ryr2	introns	No_boundary
chr6	120942026	120942125	100	-	1000	13.6142	5	5	Mical3	introns	No_boundary
chr18	36290065	36290235	171	+	1000	13.6129	4.66	5	Pura	3UTRs	No_boundary
chr13	12091011	12091068	58	-	1000	13.6081	5	5	Ryr2	introns	No_boundary
chr19	53687763	53687861	99	+	1000	13.5833	4.67	5	Rbm20	introns	No_boundary
chr7	81088124	81088303	180	+	1000	13.5644	4.62	5	Alpk3	introns	No_boundary
chr13	12094725	12094800	76	-	1000	13.5572	5	5	Ryr2	introns	No_boundary
chr13	12067743	12067827	85	-	1000	13.5326	5	5	Ryr2	introns	No_boundary
chr5	66985169	66985461	293	+	1000	13.5041	5	5	Limch1	cds	Intron_exon_boundary
chr14	54954766	54954791	26	-	1000	13.4962	5	5	Myh6	introns	No_boundary
chr13	12009211	12009319	109	-	1000	13.4944	5	5	Ryr2	introns	No_boundary
chr3	137912606	137912771	166	+	1000	13.4751	5	5	Dnajb14	3UTRs	No_boundary
chr13	108464186	108464346	161	+	1000	13.4653	5	5	Pde4d	introns	No_boundary
chr2	11721875	11722211	337	+	1000	13.4653	5	5	Il15ra	introns	No_boundary
chr13	12079719	12079872	154	-	1000	13.455	5	5	Ryr2	introns	No_boundary
chr14	54955411	54955448	38	-	1000	13.4423	5	5	Myh6	introns	No_boundary
chr13	12058237	12058332	96	-	1000	13.4188	5	5	Ryr2	introns	No_boundary
chr13	12011606	12011721	116	-	1000	13.4078	5	5	Ryr2	introns	No_boundary
chr8	61579983	61580143	161	-	1000	13.4032	4.56	5	Palld	introns	No_boundary
chr1	43129644	43129752	109	-	1000	13.3888	5	5	Fhl2	introns	No_boundary
chr13	12067208	12067490	283	-	1000	13.3884	5	5	Ryr2	introns	No_boundary
chr16	37886464	37886508	45	+	1000	13.3859	5	5	Lrrc58	3UTRs	No_boundary
chr3	102094286	102094471	186	+	1000	13.3639	4.59	5	Casq2	introns	No_boundary
chr3	123189515	123189610	96	-	1000	13.3546	5	5	Synpo2	introns	No_boundary
chr6	118751806	118752019	214	-	1000	13.3546	5	5	Cacna1c	introns	No_boundary
chr19	40325039	40325165	127	-	1000	13.3165	5	5	Sorbs1	introns	No_boundary
chr13	12038356	12038475	120	-	1000	13.316	4.6	5	Ryr2	introns	No_boundary
chr2	155389407	155389511	105	+	1000	13.3111	5	5	Trp53inp2	3UTRs	No_boundary
chr17	26772877	26773117	241	+	1000	13.3034	4.65	5	Crebrf	3UTRs	No_boundary
chr2	155387086	155387223	138	+	1000	13.2865	5	5	Trp53inp2	3UTRs	No_boundary
chr3	97727506	97727629	124	-	1000	13.2655	5	5	Pde4dip	introns	No_boundary
chr5	43287300	43287445	146	+	1000	13.2581	4.67	5	Cpeb2	3UTRs	No_boundary
chr16	8850099	8850301	203	+	1000	13.2056	4.62	5	1810013L24Rik	introns	No_boundary
chr19	53755907	53756142	236	+	1000	13.2051	5	5	Rbm20	introns	No_boundary
chr10	70014271	70014357	87	+	1000	13.1937	4.55	5	Ank3	introns	No_boundary
chr7	4520616	4520757	142	-	1000	13.1617	4.76	5	Tnni3	introns	Intron_exon_boundary
chr1	143608108	143608194	87	-	1000	13.1406	4.75	5	Cdc73	3UTRs	No_boundary
chr19	53753608	53753756	149	+	1000	13.1391	5	5	Rbm20	introns	No_boundary
chr2	39195217	39195364	148	-	1000	13.1391	4.75	5	Ppp6c	3UTRs	No_boundary
chr7	112902616	112902789	174	+	1000	13.1391	5	5	Tead1	3UTRs	No_boundary
chr18	61398556	61398695	140	-	1000	13.1045	5	5	Ppargc1b	introns	No_boundary
chr17	32773871	32774023	153	-	1000	13.1019	4.91	5	Zfp871	3UTRs	No_boundary
chr17	81646148	81646400	253	-	1000	13.1019	5	5	Slc8a1	introns	No_boundary
chr3	97727999	97728159	161	-	1000	13.0556	5	5	Pde4dip	introns	No_boundary
chr7	112900814	112900886	73	+	1000	13.0556	5	5	Tead1	3UTRs	No_boundary
chr13	12050360	12050454	95	-	1000	13.0465	4.95	5	Ryr2	introns	No_boundary
chr14	54957436	54957502	67	-	1000	13.0253	5	5	Myh6	introns	Exon_intron_boundary
chr7	81086316	81086533	218	+	1000	13.0235	4.53	5	Alpk3	introns	No_boundary
chr10	63872774	63872869	96	+	1000	13.019	4.51	5	Ctnna3	introns	No_boundary
chr11	77710613	77710730	118	+	1000	13.019	5	5	Nufip2	3UTRs	No_boundary
chr3	123190595	123190694	100	-	1000	12.9999	5	5	Synpo2	introns	No_boundary
chr13	11897913	11898067	155	-	1000	12.9659	4.7	5	Ryr2	introns	No_boundary
chr6	71392608	71392634	27	-	1000	12.9517	5	5	Rmnd5a	3UTRs	No_boundary
chr7	81064359	81064487	129	+	1000	12.9517	4.73	5	Alpk3	introns	No_boundary
chr1	43160705	43160814	110	-	1000	12.9513	4.94	5	Fhl2	introns	No_boundary
chr11	31933794	31933947	154	+	1000	12.9153	4.7	5	Cpeb4	3UTRs	No_boundary
chr10	70012714	70012981	268	+	1000	12.9122	5	5	Ank3	introns	No_boundary
chr3	123171440	123171552	113	-	1000	12.9046	4.61	5	Synpo2	introns	No_boundary
chr13	12094588	12094645	58	-	1000	12.8799	5	5	Ryr2	introns	No_boundary
chr3	31119683	31119778	96	+	1000	12.826	4.53	5	Skil	3UTRs	No_boundary
chr19	40336780	40336925	146	-	1000	12.8228	5	5	Sorbs1	introns	Exon_intron_boundary
chr19	53682935	53683016	82	+	1000	12.8123	4.99	5	Rbm20	introns	No_boundary
chr1	43162932	43163048	117	-	1000	12.812	5	5	Fhl2	introns	No_boundary
chr6	14730068	14730170	103	-	1000	12.812	5	5	Ppp1r3a	introns	No_boundary
chr6	118710889	118711031	143	-	1000	12.812	4.97	5	Cacna1c	introns	No_boundary
chr4	141656815	141656970	156	-	1000	12.8015	4.77	5	Plekhm2	introns	No_boundary
chr19	53681063	53681199	137	+	1000	12.7588	4.48	5	Rbm20	introns	No_boundary
chr10	70012600	70012672	73	+	1000	12.7561	5	5	Ank3	introns	No_boundary
chr18	80340150	80340244	95	-	1000	12.7561	4.56	5	Kcng2	introns	No_boundary
chr3	123189445	123189514	70	-	1000	12.7561	5	5	Synpo2	introns	No_boundary
chr19	53683770	53683862	93	+	1000	12.6956	5	5	Rbm20	introns	No_boundary
chr12	103354916	103355065	150	-	1000	12.677	4.78	5	Asb2	introns	No_boundary
chr17	17529542	17529576	35	-	1000	12.677	5	5	Lnpep	3UTRs	No_boundary
chr19	53818937	53819088	152	+	1000	12.677	5	5	Rbm20	introns	No_boundary
chr8	13248957	13249159	203	-	1000	12.6666	5	5	Adprhl1	introns	No_boundary
chr16	18321330	18321477	148	-	1000	12.6645	4.7	5	Tango2	introns	No_boundary
chr17	32771580	32771704	125	-	1000	12.6645	4.76	5	Zfp871	3UTRs	No_boundary
chr3	97730338	97730427	90	-	1000	12.6645	4.78	5	Pde4dip	introns	No_boundary
chr19	53720407	53720553	147	+	1000	12.661	5	5	Rbm20	introns	No_boundary
chrX	42104969	42105121	153	+	1000	12.6608	5	5	Xiap	cds	Intron_exon_boundary
chr14	54954439	54954487	49	-	1000	12.654	5	5	Myh6	introns	No_boundary
chr13	65300460	65300516	57	+	1000	12.6417	5	5	Zfp369	introns	No_boundary
chr2	155389219	155389289	71	+	1000	12.6318	5	5	Trp53inp2	3UTRs	No_boundary
chr17	46021732	46021891	160	-	1000	12.6315	5	5	Vegfa	introns	No_boundary
chr6	118636129	118636342	214	-	1000	12.6164	5	5	Cacna1c	introns	No_boundary
chr1	151355303	151355568	266	+	1000	12.6056	4.65	5	Ivns1abp	3UTRs	Intron_exon_boundary
chr13	12090743	12090853	111	-	1000	12.556	5	5	Ryr2	introns	No_boundary
chr8	126589988	126590156	169	-	1000	12.556	5	5	Irf2bp2	3UTRs	No_boundary
chr13	12039457	12039558	102	-	1000	12.5539	5	5	Ryr2	introns	No_boundary
chr13	32703331	32703376	46	-	1000	12.53	5	5	Mylk4	3UTRs	No_boundary
chr13	12099572	12099647	76	-	1000	12.5196	5	5	Ryr2	introns	No_boundary
chr16	37882358	37882437	80	+	1000	12.5196	5	5	Lrrc58	3UTRs	No_boundary
chr13	12089729	12089813	85	-	1000	12.5137	5	5	Ryr2	introns	No_boundary
chr1	43130646	43130740	95	-	1000	12.497	5	5	Fhl2	introns	No_boundary
chr13	12071908	12071997	90	-	1000	12.4907	5	5	Ryr2	introns	No_boundary
chr16	37882461	37882554	94	+	1000	12.4579	4.89	5	Lrrc58	3UTRs	No_boundary
chr3	97727760	97727903	144	-	1000	12.4579	4.5	5	Pde4dip	introns	No_boundary
chr19	53761315	53761358	44	+	1000	12.4201	4.71	5	Rbm20	introns	No_boundary
chr11	59063250	59063399	150	-	1000	12.4116	5	5	Obscn	introns	Exon_intron_boundary
chr13	12091166	12091221	56	-	1000	12.4116	4.81	5	Ryr2	introns	No_boundary
chr13	108456131	108456213	83	+	1000	12.3998	5	5	Pde4d	introns	No_boundary
chr19	53740410	53740549	140	+	1000	12.3998	4.55	5	Rbm20	introns	No_boundary
chr1	43137675	43137743	69	-	1000	12.3831	5	5	Fhl2	introns	No_boundary
chr2	91946530	91946696	167	-	1000	12.3759	4.44	5	Dgkz	introns	No_boundary
chr11	35789540	35789704	165	+	1000	12.3511	5	5	Pank3	3UTRs	No_boundary
chr13	12099936	12100002	67	-	1000	12.3181	5	5	Ryr2	introns	No_boundary
chr13	12082930	12082991	62	-	1000	12.3171	4.91	5	Ryr2	introns	No_boundary
chr19	53755806	53755895	90	+	1000	12.3086	5	5	Rbm20	introns	No_boundary
chr1	43137444	43137596	153	-	1000	12.2759	5	5	Fhl2	introns	No_boundary
chr17	46024697	46024898	202	-	1000	12.2753	5	5	Vegfa	introns	Intron_exon_boundary
chr13	11619998	11620018	21	-	1000	12.267	5	5	Ryr2	introns	No_boundary
chr6	71391050	71391214	165	-	1000	12.2548	5	5	Rmnd5a	3UTRs	No_boundary
chr13	32700934	32700989	56	-	1000	12.2522	5	5	Mylk4	3UTRs	No_boundary
chr3	123231216	123231328	113	-	1000	12.2522	4.99	5	Synpo2	introns	No_boundary
chr13	12056863	12056997	135	-	1000	12.2365	5	5	Ryr2	introns	No_boundary
chr13	12029706	12029820	115	-	1000	12.2285	5	5	Ryr2	introns	No_boundary
chr13	32702809	32702948	140	-	1000	12.2276	5	5	Mylk4	3UTRs	No_boundary
chr5	66984869	66984961	93	+	1000	12.19	4.53	5	Limch1	introns	No_boundary
chr4	8607158	8607327	170	+	1000	12.1782	5	5	Rab2a	3UTRs	No_boundary
chr13	12010917	12010998	82	-	1000	12.1779	5	5	Ryr2	introns	No_boundary
chr2	37373280	37373428	149	-	1000	12.1767	5	5	Rc3h2	3UTRs	No_boundary
chr19	40366209	40366790	582	-	1000	12.1754	4.42	5	Sorbs1	introns	No_boundary
chr13	42063316	42063466	151	+	1000	12.1715	4.49	5	Hivep1	introns	No_boundary
chr2	37374251	37374336	86	-	1000	12.1715	4.87	5	Rc3h2	3UTRs	No_boundary
chr7	81600841	81600919	79	-	1000	12.1715	4.53	5	Homer2	3UTRs	No_boundary
chr3	102093008	102093080	73	+	1000	12.1712	4.99	5	Casq2	introns	No_boundary
chr13	12062897	12062964	68	-	1000	12.1511	5	5	Ryr2	introns	No_boundary
chr13	12053970	12054026	57	-	1000	12.128	4.85	5	Ryr2	introns	No_boundary
chr13	12068718	12068785	68	-	1000	12.109	4.62	5	Ryr2	introns	No_boundary
chr13	12032460	12032569	110	-	1000	12.103	5	5	Ryr2	introns	No_boundary
chr19	53747729	53747798	70	+	1000	12.0895	5	5	Rbm20	introns	No_boundary
chr19	40318958	40319041	84	-	1000	12.0816	4.58	5	Sorbs1	introns	No_boundary
chr19	53690391	53690569	179	+	1000	12.0444	4.91	5	Rbm20	introns	No_boundary
chr4	102327052	102327370	319	+	1000	12.001	4.43	5	Pde4b	introns	No_boundary
chr3	97728779	97728872	94	-	1000	11.9973	4.83	5	Pde4dip	introns	No_boundary
chr19	53797382	53797578	197	+	1000	11.9864	4.9	5	Rbm20	introns	No_boundary
chr10	70013812	70014004	193	+	1000	11.9543	5	5	Ank3	cds	Exon_intron_boundary
chr18	5109509	5109681	173	+	1000	11.9462	4.55	5	Svil	introns	No_boundary
chr13	108455149	108455235	87	+	1000	11.9428	5	5	Pde4d	introns	No_boundary
chr19	53723264	53723375	112	+	1000	11.9405	4.93	5	Rbm20	introns	No_boundary
chr10	95310171	95310269	99	-	1000	11.9383	5	5	Cradd	introns	No_boundary
chr16	57360347	57360436	90	+	1000	11.9383	4.73	5	Filip1l	introns	No_boundary
chr8	13250436	13250576	141	-	1000	11.9383	4.85	5	Adprhl1	introns	No_boundary
chr18	36290377	36290482	106	+	1000	11.9358	4.76	5	Pura	3UTRs	No_boundary
chr14	54955223	54955292	70	-	1000	11.9123	5	5	Myh6	introns	No_boundary
chr7	112906417	112906602	186	+	1000	11.9009	5	5	Tead1	3UTRs	No_boundary
chr11	31933359	31933696	338	+	1000	11.8981	4.94	5	Cpeb4	3UTRs	No_boundary
chr10	63612793	63612941	149	+	1000	11.85	4.39	5	Ctnna3	introns	No_boundary
chr7	19086692	19086820	129	+	1000	11.8145	4.94	5	Dmpk	introns	Exon_intron_boundary
chr16	57364853	57364974	122	+	1000	11.7986	5	5	Filip1l	introns	No_boundary
chr19	53772688	53772766	79	+	1000	11.7986	4.51	5	Rbm20	introns	No_boundary
chr5	74001003	74001223	221	-	1000	11.7986	4.54	5	Usp46	3UTRs	No_boundary
chr15	96268962	96269201	240	-	1000	11.7962	4.91	5	2610037D02Rik	introns	No_boundary
chr16	37882890	37883043	154	+	1000	11.791	4.84	5	Lrrc58	3UTRs	No_boundary
chr13	11995629	11995766	138	-	1000	11.7812	4.99	5	Ryr2	introns	No_boundary
chr18	24825336	24825489	154	+	1000	11.7508	4.9	5	Fhod3	introns	No_boundary
chr19	53821471	53821560	90	+	1000	11.7508	4.82	5	Rbm20	introns	No_boundary
chr4	116364984	116365070	87	-	1000	11.729	4.65	5	Mast2	introns	No_boundary
chr13	12105975	12106028	54	-	1000	11.729	5	5	Ryr2	introns	No_boundary
chr1	43134278	43134350	73	-	1000	11.7262	4.9	5	Fhl2	introns	No_boundary
chr16	37878474	37878561	88	+	1000	11.7116	4.93	5	Lrrc58	cds	Exon_intron_boundary
chr6	118632629	118632890	262	-	1000	11.7116	4.59	5	Cacna1c	introns	No_boundary
chr16	57469618	57469776	159	+	1000	11.702	5	5	Filip1l	introns	No_boundary
chr7	81601076	81601167	92	-	1000	11.702	4.76	5	Homer2	3UTRs	No_boundary
chr7	122082031	122082097	67	+	1000	11.6981	5	5	Ubfd1	3UTRs	Exon_intron_boundary
chr19	40319955	40320163	209	-	1000	11.6823	4.91	5	Sorbs1	introns	No_boundary
chr1	43141562	43141644	83	-	1000	11.6788	5	5	Fhl2	introns	Exon_intron_boundary
chr17	81646733	81646885	153	-	1000	11.6788	4.86	5	Slc8a1	introns	No_boundary
chr8	61588027	61588192	166	-	1000	11.6782	4.36	4.97	Palld	introns	No_boundary
chr13	12032239	12032391	153	-	1000	11.6695	5	5	Ryr2	introns	No_boundary
chr1	131933755	131933931	177	+	1000	11.6444	4.87	5	Nucks1	3UTRs	No_boundary
chr7	112904995	112905121	127	+	1000	11.6444	4.94	5	Tead1	3UTRs	No_boundary
chr13	12012761	12012852	92	-	1000	11.6417	4.98	5	Ryr2	introns	No_boundary
chr5	43287446	43287532	87	+	1000	11.6008	4.86	5	Cpeb2	3UTRs	No_boundary
chr13	12104439	12104517	79	-	1000	11.5891	5	5	Ryr2	introns	No_boundary
chr7	112903671	112903763	93	+	1000	11.5889	4.72	5	Tead1	3UTRs	No_boundary
chr19	53679635	53679700	66	+	1000	11.5341	4.67	5	Rbm20	introns	No_boundary
chr13	12098737	12098771	35	-	1000	11.5221	5	5	Ryr2	introns	No_boundary
chr1	189893022	189893308	287	-	1000	11.5163	4.38	4.98	Smyd2	introns	No_boundary
chr19	53693509	53693612	104	+	1000	11.5146	4.63	5	Rbm20	introns	No_boundary
chr19	40336645	40336779	135	-	1000	11.5146	4.82	5	Sorbs1	introns	No_boundary
chr8	88258267	88258414	148	+	1000	11.5089	4.97	5	Tent4b	3UTRs	No_boundary
chr3	123173003	123173160	158	-	1000	11.5031	5	5	Synpo2	introns	No_boundary
chr18	61358789	61358904	116	-	1000	11.501	4.69	5	Ppargc1b	introns	No_boundary
chr3	102087584	102087706	123	+	1000	11.5006	4.58	5	Casq2	introns	No_boundary
chr13	12101071	12101150	80	-	1000	11.4575	5	5	Ryr2	introns	No_boundary
chr2	91126646	91126823	178	+	1000	11.457	4.5	5	Mybpc3	introns	No_boundary
chr2	114050980	114051059	80	-	1000	11.4541	4.65	5	Actc1	introns	No_boundary
chr13	91862642	91862799	158	-	1000	11.4487	5	5	Ckmt2	introns	No_boundary
chr17	43859426	43859526	101	+	1000	11.4487	4.89	5	Rcan2	introns	No_boundary
chr5	150307368	150307586	219	+	1000	11.4451	4.45	5	Fry	introns	No_boundary
chr1	43160912	43160962	51	-	1000	11.4133	4.84	5	Fhl2	introns	No_boundary
chr13	108461606	108461714	109	+	1000	11.4133	4.5	5	Pde4d	introns	No_boundary
chr6	118709536	118709708	173	-	1000	11.3858	4.79	5	Cacna1c	introns	No_boundary
chr1	135837814	135837863	50	+	1000	11.3593	5	5	Tnnt2	introns	No_boundary
chr14	101916361	101916587	227	+	1000	11.3402	4.96	5	Lmo7	introns	No_boundary
chr13	12004714	12004819	106	-	1000	11.3315	5	5	Ryr2	introns	No_boundary
chr19	53743783	53743913	131	+	1000	11.3086	4.38	4.99	Rbm20	introns	No_boundary
chr8	61799233	61799382	150	-	1000	11.3009	4.99	5	Palld	introns	No_boundary
chr8	61799914	61800007	94	-	1000	11.2886	4.35	4.96	Palld	introns	No_boundary
chr13	12058153	12058236	84	-	1000	11.2827	5	5	Ryr2	introns	No_boundary
chr3	102094579	102094746	168	+	1000	11.2686	4.42	5	Casq2	introns	No_boundary
chr2	114051327	114051542	216	-	1000	11.2541	4.44	5	Actc1	introns	No_boundary
chr18	36296479	36296707	229	+	1000	11.2367	4.91	5	Igip	1to5kb	No_boundary
chr19	53679423	53679537	115	+	1000	11.2304	4.4	5	Rbm20	introns	No_boundary
chr13	45711687	45711795	109	-	1000	11.2277	4.43	5	Atxn1	introns	No_boundary
chr8	61800649	61800759	111	-	1000	11.2273	4.33	4.94	Palld	introns	No_boundary
chr16	8848669	8848812	144	+	1000	11.2217	4.89	5	1810013L24Rik	introns	No_boundary
chr19	53748130	53748207	78	+	1000	11.2217	4.72	5	Rbm20	introns	No_boundary
chr13	11807859	11807938	80	-	1000	11.2201	4.31	4.92	Ryr2	introns	No_boundary
chr13	12048200	12048373	174	-	1000	11.208	4.51	5	Ryr2	introns	No_boundary
chr19	53821878	53822004	127	+	1000	11.208	5	5	Rbm20	introns	No_boundary
chr6	118630392	118630548	157	-	1000	11.208	4.93	5	Cacna1c	cds	Exon_intron_boundary
chr7	112901829	112901883	55	+	1000	11.208	4.89	5	Tead1	3UTRs	No_boundary
chr12	103338848	103338969	122	-	1000	11.187	4.96	5	Asb2	introns	No_boundary
chr13	12058377	12058576	200	-	1000	11.1809	5	5	Ryr2	introns	No_boundary
chr13	46423907	46424029	123	+	1000	11.1687	4.92	5	Rbm24	introns	No_boundary
chr15	27490846	27491011	166	+	1000	11.151	4.78	5	Ank	introns	No_boundary
chr13	12089227	12089274	48	-	1000	11.1398	4.8	5	Ryr2	introns	No_boundary
chr12	103341927	103342220	294	-	1000	11.1152	4.85	5	Asb2	introns	No_boundary
chr13	98839260	98839417	158	-	1000	11.1152	5	5	Tnpo1	3UTRs	No_boundary
chr15	90227396	90227577	182	+	1000	11.1152	4.82	5	Alg10b	cds	Intron_exon_boundary
chr7	112905429	112905507	79	+	1000	11.0989	5	5	Tead1	3UTRs	No_boundary
chr19	53758047	53758099	53	+	1000	11.0926	4.9	5	Rbm20	introns	No_boundary
chr19	53758619	53758656	38	+	1000	11.0926	4.53	5	Rbm20	introns	No_boundary
chr19	53727856	53727958	103	+	1000	11.0783	5	5	Rbm20	introns	No_boundary
chr2	104426682	104426762	81	-	1000	11.0783	4.43	5	Hipk3	3UTRs	No_boundary
chr11	59063404	59063511	108	-	1000	11.0676	5	5	Obscn	cds	Exon_intron_boundary
chr13	12025529	12025647	119	-	1000	11.0642	5	5	Ryr2	introns	No_boundary
chr19	53760599	53760673	75	+	1000	11.0627	4.97	5	Rbm20	introns	No_boundary
chr19	53745804	53745958	155	+	1000	11.0623	5	5	Rbm20	introns	No_boundary
chr13	11605121	11605301	181	-	1000	11.0589	4.4	5	Ryr2	cds	Exon_intron_boundary
chr13	12095786	12095850	65	-	1000	11.0445	5	5	Ryr2	introns	No_boundary
chr2	114050776	114050877	102	-	1000	11.0147	5	5	Actc1	introns	Intron_exon_boundary
chrX	101655548	101655648	101	+	1000	11.0036	5	5	Ogt	cds	Exon_intron_boundary
chr13	12093092	12093207	116	-	1000	10.9992	5	5	Ryr2	introns	No_boundary
chr8	79674486	79674572	87	+	1000	10.9938	4.35	4.96	Otud4	3UTRs	No_boundary
chr1	189894320	189894412	93	-	1000	10.9685	4.82	5	Smyd2	introns	No_boundary
chr17	46121778	46121948	171	+	1000	10.9685	4.64	5	Mrps18a	introns	No_boundary
chr16	57361320	57361445	126	+	1000	10.9662	4.94	5	Filip1l	introns	No_boundary
chr19	53760462	53760533	72	+	1000	10.9662	5	5	Rbm20	introns	No_boundary
chr2	27539854	27539903	50	-	1000	10.9616	4.62	5	NA	exons	Intron_exon_boundary
chr9	110763678	110763786	109	+	1000	10.9515	5	5	Myl3	cds	Exon_intron_boundary
chr13	12082636	12082710	75	-	1000	10.9455	5	5	Ryr2	introns	No_boundary
chr7	81604743	81604863	121	-	1000	10.9258	4.91	5	Homer2	3UTRs	No_boundary
chr11	35330669	35330812	144	+	1000	10.9236	4.79	5	Slit3	introns	No_boundary
chr1	151355680	151355920	241	+	1000	10.9234	4.74	5	Ivns1abp	3UTRs	No_boundary
chr18	80338257	80338379	123	-	1000	10.9181	4.96	5	Kcng2	introns	No_boundary
chr19	53753849	53753954	106	+	1000	10.9181	5	5	Rbm20	introns	No_boundary
chr13	91862048	91862260	213	-	1000	10.9175	4.31	4.92	Ckmt2	introns	No_boundary
chr3	123234469	123234621	153	-	1000	10.9175	5	5	Synpo2	introns	No_boundary
chr17	81643497	81643692	196	-	1000	10.9084	5	5	Slc8a1	introns	No_boundary
chr7	28816883	28816957	75	+	1000	10.9062	4.97	5	Hnrnpl	introns	No_boundary
chr13	32703505	32703697	193	-	1000	10.8894	5	5	Mylk4	3UTRs	No_boundary
chr13	12095405	12095509	105	-	1000	10.8588	5	5	Ryr2	introns	No_boundary
chr17	81640216	81640443	228	-	1000	10.8588	4.3	4.91	Slc8a1	introns	No_boundary
chr13	11998341	11998535	195	-	1000	10.8512	4.92	5	Ryr2	introns	No_boundary
chr19	53755203	53755264	62	+	1000	10.8512	5	5	Rbm20	introns	No_boundary
chr7	112849382	112849581	200	+	1000	10.8492	4.97	5	Tead1	introns	No_boundary
chr6	118631522	118631694	173	-	1000	10.8415	5	5	Cacna1c	introns	No_boundary
chr2	155386955	155387085	131	+	1000	10.8283	5	5	Trp53inp2	3UTRs	No_boundary
chr13	12100771	12100922	152	-	1000	10.8196	5	5	Ryr2	introns	No_boundary
chr16	57390104	57390332	229	+	1000	10.8134	4.32	4.93	Filip1l	introns	No_boundary
chr10	63871744	63871835	92	+	1000	10.793	4.77	5	Ctnna3	introns	No_boundary
chr3	137910929	137910990	62	+	1000	10.793	4.26	4.88	Dnajb14	3UTRs	No_boundary
chr13	12039910	12039964	55	-	1000	10.7793	4.73	5	Ryr2	introns	No_boundary
chr1	43130962	43131000	39	-	1000	10.7725	5	5	Fhl2	introns	No_boundary
chr3	97725137	97725283	147	-	1000	10.7725	4.9	5	Pde4dip	introns	No_boundary
chr1	43152540	43152600	61	-	1000	10.772	4.54	5	Fhl2	introns	No_boundary
chr12	103344200	103344379	180	-	1000	10.772	4.75	5	Asb2	introns	No_boundary
chr14	34588252	34588288	37	-	1000	10.772	5	5	Ldb3	introns	Exon_intron_boundary
chr6	118628647	118628802	156	-	1000	10.772	4.65	5	Cacna1c	introns	No_boundary
chr13	12071774	12071863	90	-	1000	10.7539	5	5	Ryr2	introns	No_boundary
chr13	12077880	12077943	64	-	1000	10.75	5	5	Ryr2	introns	No_boundary
chr11	88341808	88341895	88	-	1000	10.7185	4.95	5	Msi2	3UTRs	No_boundary
chr7	112848563	112848763	201	+	1000	10.7149	4.72	5	Tead1	introns	No_boundary
chr13	98842668	98842742	75	-	1000	10.7014	4.62	5	Tnpo1	3UTRs	No_boundary
chr19	53684824	53685027	204	+	1000	10.6861	4.85	5	Rbm20	introns	No_boundary
chr3	123169898	123169969	72	-	1000	10.6773	4.99	5	Synpo2	introns	No_boundary
chr6	118748216	118748283	68	-	1000	10.6773	4.74	5	Cacna1c	introns	No_boundary
chr6	71392141	71392386	246	-	1000	10.6684	4.42	5	Rmnd5a	3UTRs	No_boundary
chr11	117427039	117427230	192	+	1000	10.6548	4.9	5	NA	introns	No_boundary
chr6	36462197	36462454	258	+	1000	10.6548	4.44	5	Chrm2	introns	No_boundary
chr11	3519197	3519356	160	-	1000	10.6386	4.91	5	Smtn	introns	No_boundary
chr13	12091101	12091149	49	-	1000	10.6353	5	5	Ryr2	introns	No_boundary
chr2	91946716	91946837	122	-	1000	10.6353	4.91	5	Dgkz	introns	No_boundary
chr3	101588754	101588958	205	-	1000	10.6347	4.28	4.89	Atp1a1	introns	Exon_intron_boundary
chr3	102124322	102124514	193	+	1000	10.6336	4.32	4.93	Casq2	introns	No_boundary
chr1	135841983	135842101	119	+	1000	10.632	4.99	5	Tnnt2	cds	Exon_intron_boundary
chr6	72858773	72858908	136	-	1000	10.6318	4.41	5	Kcmf1	cds	Exon_intron_boundary
chr13	12048018	12048061	44	-	1000	10.6275	5	5	Ryr2	introns	No_boundary
chr13	108458920	108459277	358	+	1000	10.6015	5	5	Pde4d	introns	No_boundary
chr13	11680270	11680362	93	-	1000	10.6015	4.71	5	Ryr2	introns	No_boundary
chr18	24825709	24825918	210	+	1000	10.6015	5	5	Fhod3	introns	No_boundary
chr7	122081734	122081794	61	+	1000	10.6015	5	5	Ubfd1	3UTRs	No_boundary
chr1	43158519	43158597	79	-	1000	10.6008	4.96	5	Fhl2	introns	No_boundary
chr13	12081707	12081776	70	-	1000	10.6008	5	5	Ryr2	introns	No_boundary
chr15	103198693	103198839	147	-	1000	10.5784	4.96	5	Cbx5	3UTRs	No_boundary
chr13	12020290	12020403	114	-	1000	10.5591	4.94	5	Ryr2	introns	No_boundary
chr3	123168750	123168943	194	-	1000	10.5516	5	5	Synpo2	introns	No_boundary
chr8	61663885	61664067	183	-	1000	10.5498	4.52	5	Palld	introns	No_boundary
chr13	98841481	98841607	127	-	1000	10.5493	4.91	5	Tnpo1	3UTRs	No_boundary
chr19	53822119	53822201	83	+	1000	10.5493	4.6	5	Rbm20	introns	No_boundary
chr19	53831303	53831412	110	+	1000	10.5493	4.49	5	Rbm20	introns	No_boundary
chr6	71390164	71390197	34	-	1000	10.5493	4.24	4.86	Rmnd5a	3UTRs	No_boundary
chr6	120946434	120946568	135	-	1000	10.5493	4.8	5	Mical3	cds	Exon_intron_boundary
chr19	53740915	53741170	256	+	1000	10.5256	4.56	5	Rbm20	introns	No_boundary
chr13	12052009	12052063	55	-	1000	10.5059	4.97	5	Ryr2	introns	No_boundary
chr3	123012249	123012425	177	-	1000	10.485	4.9	5	Myoz2	introns	No_boundary
chr4	116365857	116365975	119	-	1000	10.485	4.7	5	Mast2	introns	No_boundary
chr1	131931626	131931710	85	+	1000	10.4826	4.98	5	Nucks1	3UTRs	No_boundary
chr15	102528673	102528747	75	-	1000	10.4802	4.81	5	NA	cds	No_boundary
chrX	42107710	42107830	121	+	1000	10.4802	4.85	5	Xiap	3UTRs	No_boundary
chr13	12101297	12101391	95	-	1000	10.4568	5	5	Ryr2	introns	No_boundary
chr3	123188382	123188453	72	-	1000	10.4565	4.75	5	Synpo2	introns	No_boundary
chr9	20434499	20434594	96	-	1000	10.4565	4.79	5	Zfp26	3UTRs	No_boundary
chr12	36618403	36618520	118	+	1000	10.4414	4.17	4.8	Crppa	introns	No_boundary
chr3	123186902	123186955	54	-	1000	10.4414	4.76	5	Synpo2	introns	No_boundary
chr3	123187694	123187998	305	-	1000	10.4414	4.74	5	Synpo2	introns	No_boundary
chr11	59059278	59059374	97	-	1000	10.409	5	5	Obscn	introns	No_boundary
chr11	77822678	77822961	284	+	1000	10.4018	4.22	4.85	Myo18a	introns	Exon_intron_boundary
chr16	57385108	57385235	128	+	1000	10.4018	4.38	4.99	Filip1l	introns	No_boundary
chr11	3525158	3525330	173	-	1000	10.3884	4.72	5	Smtn	cds	Exon_intron_boundary
chr16	8847612	8847795	184	+	1000	10.3837	5	5	1810013L24Rik	introns	No_boundary
chr13	12099660	12099807	148	-	1000	10.3711	5	5	Ryr2	introns	No_boundary
chr13	65300263	65300364	102	+	1000	10.3707	4.86	5	Zfp369	introns	No_boundary
chr9	71552860	71552967	108	-	1000	10.3704	5	5	Myzap	introns	No_boundary
chr13	12041999	12042125	127	-	1000	10.3645	4.99	5	Ryr2	introns	No_boundary
chr19	40301193	40301362	170	-	1000	10.3637	4.52	5	Sorbs1	introns	No_boundary
chr15	102528800	102528853	54	-	1000	10.36	4.81	5	NA	cds	Intron_exon_boundary
chr13	98842221	98842357	137	-	1000	10.3592	4.32	4.94	Tnpo1	3UTRs	No_boundary
chr11	59066121	59066205	85	-	1000	10.3499	5	5	Obscn	introns	No_boundary
chr13	98843718	98843789	72	-	1000	10.3499	4.71	5	Tnpo1	3UTRs	No_boundary
chr16	37881992	37882235	244	+	1000	10.3499	4.9	5	Lrrc58	3UTRs	No_boundary
chr3	123166765	123166878	114	-	1000	10.3499	5	5	Synpo2	introns	No_boundary
chr13	65300154	65300219	66	+	1000	10.3495	4.69	5	Zfp369	introns	No_boundary
chr3	137911468	137911633	166	+	1000	10.3495	4.76	5	Dnajb14	3UTRs	No_boundary
chr16	37881656	37881785	130	+	1000	10.3477	4.94	5	Lrrc58	3UTRs	No_boundary
chr13	12054894	12054951	58	-	1000	10.3328	4.57	5	Ryr2	introns	No_boundary
chr5	125388197	125388322	126	-	1000	10.3328	4.22	4.84	Ubc	cds	Intron_exon_boundary
chr10	70007864	70007975	112	+	1000	10.3231	4.71	5	Ank3	introns	No_boundary
chr6	118749483	118749545	63	-	1000	10.3231	4.66	5	Cacna1c	introns	No_boundary
chr8	61664237	61664326	90	-	1000	10.3231	4.36	4.96	Palld	introns	No_boundary
chr11	59016639	59016732	94	-	1000	10.3016	4.35	4.96	Obscn	introns	No_boundary
chr18	24722678	24722784	107	+	1000	10.3016	4.81	5	Fhod3	introns	No_boundary
chr6	36462494	36462830	337	+	1000	10.3016	4.67	5	Chrm2	introns	No_boundary
chr9	119519402	119519662	261	-	1000	10.3016	5	5	Scn5a	introns	No_boundary
chr7	81064690	81065027	338	+	1000	10.252	4.98	5	Alpk3	introns	No_boundary
chr7	81065464	81065693	230	+	1000	10.252	4.65	5	Alpk3	introns	No_boundary
chrX	42105722	42105792	71	+	1000	10.252	4.99	5	Xiap	3UTRs	No_boundary
chr14	34526857	34526952	96	-	1000	10.2419	4.31	4.91	Ldb3	3UTRs	No_boundary
chr19	53752952	53753042	91	+	1000	10.2344	5	5	Rbm20	introns	No_boundary
chr3	102093773	102094005	233	+	1000	10.2344	5	5	Casq2	introns	No_boundary
chr3	123168151	123168475	325	-	1000	10.2344	4.85	5	Synpo2	introns	No_boundary
chr3	123232094	123232227	134	-	1000	10.2344	5	5	Synpo2	introns	No_boundary
chr7	30958613	30958823	211	+	1000	10.2344	4.77	5	NA	exons	No_boundary
chr7	112852515	112852684	170	+	1000	10.2219	4.79	5	Tead1	introns	No_boundary
chr2	155389748	155389814	67	+	1000	10.2206	4.92	5	Trp53inp2	3UTRs	Exon_intron_boundary
chr3	123230616	123230656	41	-	1000	10.2023	4.32	4.93	Synpo2	introns	No_boundary
chr19	53818232	53818312	81	+	1000	10.2022	4.74	5	Rbm20	introns	No_boundary
chr2	91947965	91948084	120	-	1000	10.2022	4.78	5	Dgkz	introns	No_boundary
chr9	68916522	68916715	194	+	1000	10.1939	4.23	4.85	Rora	introns	No_boundary
chr13	12072391	12072552	162	-	1000	10.1806	4.48	5	Ryr2	introns	No_boundary
chr13	12006469	12006552	84	-	1000	10.159	4.68	5	Ryr2	introns	No_boundary
chr1	195036532	195036781	250	+	1000	10.1495	4.19	4.82	A330023F24Rik	exons	Exon_intron_boundary
chr1	43134737	43134829	93	-	1000	10.1482	4.19	4.82	Fhl2	introns	No_boundary
chr19	53804716	53804808	93	+	1000	10.1482	4.17	4.79	Rbm20	introns	No_boundary
chr16	8849847	8850002	156	+	1000	10.1467	4.49	5	1810013L24Rik	introns	No_boundary
chr14	54955185	54955203	19	-	1000	10.1442	5	5	Myh6	introns	No_boundary
chr11	35331394	35331498	105	+	1000	10.1351	4.9	5	Slit3	introns	No_boundary
chr11	59064008	59064128	121	-	1000	10.1277	5	5	Obscn	introns	Exon_intron_boundary
chr11	65334071	65334282	212	-	1000	10.1023	5	5	Gm12295	introns	No_boundary
chr1	131932520	131932687	168	+	1000	10.1006	4.58	5	Nucks1	3UTRs	Exon_intron_boundary
chr19	53716188	53716288	101	+	1000	10.0949	4.94	5	Rbm20	introns	No_boundary
chr1	177449361	177449464	104	+	1000	10.0791	4.12	4.73	Zbtb18	3UTRs	No_boundary
chr6	120948157	120948313	157	-	1000	10.0545	4.63	5	Mical3	introns	No_boundary
chr13	12093401	12093588	188	-	1000	10.0491	5	5	Ryr2	introns	No_boundary
chr8	33802274	33802414	141	-	1000	10.0487	4.45	5	Rbpms	introns	No_boundary
chr3	123226602	123226725	124	-	1000	10.0433	4.95	5	Synpo2	introns	No_boundary
chr16	37884134	37884207	74	+	1000	10.0196	4.92	5	Lrrc58	3UTRs	No_boundary
chr13	12012186	12012273	88	-	1000	10.0128	4.84	5	Ryr2	introns	No_boundary
chr15	90225764	90225854	91	+	1000	10.0021	4.73	5	Alg10b	cds	Exon_intron_boundary
chr16	57485888	57485986	99	+	1000	10.0021	4.56	5	Filip1l	introns	No_boundary
chr6	120936430	120936529	100	-	1000	10.0021	4.21	4.83	Mical3	introns	No_boundary
chr9	48818557	48818707	151	-	1000	9.9609	4.12	4.73	Zbtb16	introns	No_boundary
chr3	137915520	137915615	96	+	1000	9.95934	4.38	4.98	Dnajb14	3UTRs	No_boundary
chr8	13250079	13250163	85	-	1000	9.95934	4.6	5	Adprhl1	introns	No_boundary
chr8	79674929	79675026	98	+	1000	9.95265	4.82	5	Otud4	3UTRs	No_boundary
chr8	33802537	33802687	151	-	1000	9.95265	4.96	5	Rbpms	introns	No_boundary
chr19	53710073	53710186	114	+	1000	9.93569	4.36	4.96	Rbm20	introns	No_boundary
chr1	143606199	143606490	292	-	1000	9.9246	4.62	5	Cdc73	3UTRs	No_boundary
chr11	104579724	104579826	103	+	1000	9.9246	4.68	5	Myl4	introns	No_boundary
chr6	118752903	118753004	102	-	1000	9.9246	4.83	5	Cacna1c	introns	No_boundary
chr2	91127897	91128058	162	+	1000	9.92329	4.63	5	Mybpc3	introns	No_boundary
chr16	8848434	8848593	160	+	1000	9.91364	4.92	5	1810013L24Rik	introns	No_boundary
chr1	170198256	170198359	104	-	1000	9.90735	4.8	5	Uhmk1	3UTRs	No_boundary
chr3	102092476	102092576	101	+	1000	9.90735	4.82	5	Casq2	introns	No_boundary
chr3	123187267	123187329	63	-	1000	9.90735	4.99	5	Synpo2	introns	No_boundary
chr7	112849924	112850022	99	+	1000	9.90735	4.71	5	Tead1	introns	No_boundary
chr2	11722458	11722601	144	+	1000	9.90696	4.87	5	Il15ra	introns	No_boundary
chr8	3155546	3155633	88	-	1000	9.90696	4.59	5	Insr	3UTRs	No_boundary
chr17	43853851	43853947	97	+	1000	9.90434	4.57	5	Rcan2	introns	No_boundary
chr19	53773387	53773533	147	+	1000	9.90434	4.71	5	Rbm20	introns	No_boundary
chr1	131933557	131933643	87	+	1000	9.89781	5	5	Nucks1	3UTRs	No_boundary
chr17	46023881	46024029	149	-	1000	9.89781	4.33	4.94	Vegfa	introns	Exon_intron_boundary
chr8	79675585	79675714	130	+	1000	9.89781	4.94	5	Otud4	3UTRs	No_boundary
chr4	116365312	116365387	76	-	1000	9.89049	4.19	4.82	Mast2	introns	No_boundary
chr1	43139651	43139717	67	-	1000	9.88032	4.96	5	Fhl2	introns	No_boundary
chr19	40328091	40328197	107	-	1000	9.87906	4.84	5	Sorbs1	introns	No_boundary
chr1	169950185	169950300	116	-	1000	9.87662	4.52	5	Hsd17b7	3UTRs	No_boundary
chr13	11688958	11689036	79	-	1000	9.87662	4.55	5	Ryr2	introns	No_boundary
chr18	10782369	10782469	101	-	1000	9.87662	4.59	5	NA	introns	No_boundary
chr5	31132525	31132651	127	+	1000	9.8729	4.15	4.78	Trim54	introns	No_boundary
chr3	142390543	142390690	148	-	1000	9.86442	4.65	5	Pdlim5	introns	No_boundary
chr13	12018933	12019034	102	-	1000	9.85858	4.32	4.93	Ryr2	introns	No_boundary
chr17	71084069	71084203	135	+	1000	9.84842	5	5	Myom1	introns	Intron_exon_boundary
chr13	12088526	12088562	37	-	1000	9.84713	4.86	5	Ryr2	introns	No_boundary
chr13	12287851	12288021	171	-	1000	9.84713	4.36	4.97	Actn2	introns	No_boundary
chr1	43157170	43157247	78	-	1000	9.82022	4.85	5	Fhl2	introns	No_boundary
chr11	120347305	120347461	157	-	1000	9.80465	4.9	5	Actg1	cds	Exon_intron_boundary
chr9	68712891	68713056	166	+	1000	9.803	4.53	5	Rora	introns	No_boundary
chr3	102136635	102136851	217	+	1000	9.7935	4.18	4.8	Casq2	introns	No_boundary
chr17	81646428	81646585	158	-	1000	9.77906	5	5	Slc8a1	introns	No_boundary
chr13	108727243	108727592	350	+	1000	9.77604	4.61	5	Pde4d	introns	No_boundary
chr5	66987607	66987746	140	+	1000	9.77604	4.74	5	Limch1	cds	Exon_intron_boundary
chr7	81085645	81085776	132	+	1000	9.77604	4.98	5	Alpk3	introns	No_boundary
chr13	12063417	12063477	61	-	1000	9.77397	4.92	5	Ryr2	introns	No_boundary
chr12	99330364	99330551	188	-	1000	9.76641	4.69	5	Foxn3	introns	No_boundary
chr15	90227834	90228015	182	+	1000	9.76641	5	5	Alg10b	cds	No_boundary
chr3	123188134	123188219	86	-	1000	9.76641	4.92	5	Synpo2	introns	No_boundary
chr7	81083217	81083336	120	+	1000	9.76641	4.54	5	Alpk3	introns	No_boundary
chr9	20433924	20434032	109	-	1000	9.76641	4.26	4.88	Zfp26	3UTRs	No_boundary
chr11	69936566	69936737	172	+	1000	9.76008	4.37	4.98	Ybx2	introns	Intron_exon_boundary
chr13	12057265	12057298	34	-	1000	9.76008	4.84	5	Ryr2	introns	No_boundary
chr16	38375412	38375550	139	+	1000	9.75945	4.62	5	Popdc2	introns	No_boundary
chr8	13249904	13250078	175	-	1000	9.75945	5	5	Adprhl1	introns	No_boundary
chr11	59059840	59060062	223	-	1000	9.75195	4.12	4.74	Obscn	introns	No_boundary
chr13	12098706	12098736	31	-	1000	9.75195	4.72	5	Ryr2	introns	No_boundary
chr16	37884304	37884414	111	+	1000	9.75195	4.48	5	Lrrc58	3UTRs	No_boundary
chr13	32704350	32704585	236	-	1000	9.74456	5	5	Mylk4	3UTRs	No_boundary
chr2	91123255	91123341	87	+	1000	9.74124	4.79	5	Mybpc3	introns	No_boundary
chr4	130313021	130313130	110	+	1000	9.72825	4.77	5	Fabp3	introns	No_boundary
chr11	3518436	3518571	136	-	1000	9.72702	4.57	5	Smtn	introns	No_boundary
chr13	12102287	12102481	195	-	1000	9.71835	5	5	Ryr2	introns	No_boundary
chr2	146926612	146926756	145	+	1000	9.71211	4.55	5	Kiz	introns	No_boundary
chr2	77111228	77111356	129	-	1000	9.71211	4.65	5	Ccdc141	introns	No_boundary
chr3	123187379	123187512	134	-	1000	9.71211	4.83	5	Synpo2	introns	No_boundary
chr13	12063727	12063792	66	-	1000	9.69214	4.98	5	Ryr2	introns	No_boundary
chr13	91861893	91862047	155	-	1000	9.69214	5	5	Ckmt2	introns	Exon_intron_boundary
chr13	12056729	12056767	39	-	1000	9.68317	4.62	5	Ryr2	introns	No_boundary
chr17	81645574	81645773	200	-	1000	9.67704	4.1	4.71	Slc8a1	introns	No_boundary
chr10	63870454	63870550	97	+	1000	9.67626	4.64	5	Ctnna3	introns	No_boundary
chr13	98841830	98841932	103	-	1000	9.67626	4.74	5	Tnpo1	3UTRs	No_boundary
chr19	53745667	53745737	71	+	1000	9.67626	4.73	5	Rbm20	introns	No_boundary
chr8	61662586	61662807	222	-	1000	9.67626	4.73	5	Palld	introns	No_boundary
chr9	48778977	48779051	75	-	1000	9.67626	4.19	4.81	Zbtb16	introns	No_boundary
chrX	17557288	17557417	130	-	1000	9.67626	4.79	5	Fundc1	3UTRs	No_boundary
chr11	77712017	77712202	186	+	1000	9.65341	4.61	5	Nufip2	3UTRs	No_boundary
chr10	63611278	63611481	204	+	1000	9.64864	4.14	4.76	Ctnna3	introns	No_boundary
chr18	5109228	5109383	156	+	1000	9.64864	4.66	5	Svil	introns	No_boundary
chr16	57461058	57461149	92	+	1000	9.64651	4.13	4.75	Filip1l	introns	No_boundary
chr12	103337667	103337785	119	-	1000	9.64111	4.99	5	Asb2	introns	No_boundary
chr13	11807342	11807441	100	-	1000	9.63091	4.95	5	Ryr2	introns	No_boundary
chr14	101885576	101885802	227	+	1000	9.63091	4.95	5	Lmo7	introns	Exon_intron_boundary
chr5	125389580	125389700	121	-	1000	9.62932	4.06	4.67	Ubc	introns	Exon_intron_boundary
chr3	137911075	137911154	80	+	1000	9.62751	4.61	5	Dnajb14	3UTRs	No_boundary
chr3	126844677	126844859	183	+	1000	9.62672	4.11	4.73	Camk2d	3UTRs	Exon_intron_boundary
chr14	101886057	101886320	264	+	1000	9.61595	4.85	5	Lmo7	introns	No_boundary
chr4	130311840	130311948	109	+	1000	9.61595	4.66	5	Fabp3	introns	No_boundary
chr6	118640931	118641038	108	-	1000	9.61595	4.88	5	Cacna1c	introns	No_boundary
chr7	112906674	112906725	52	+	1000	9.61202	4.86	5	Tead1	3UTRs	Exon_intron_boundary
chr12	111794603	111794789	187	+	1000	9.60727	4.49	5	Klc1	3UTRs	Exon_intron_boundary
chr4	130313176	130313286	111	+	1000	9.60727	4.71	5	Fabp3	introns	No_boundary
chr13	108462191	108462300	110	+	1000	9.60564	4.28	4.89	Pde4d	introns	No_boundary
chr13	12008590	12008672	83	-	1000	9.60236	4.83	5	Ryr2	introns	No_boundary
chr11	77710430	77710565	136	+	1000	9.5923	4.89	5	Nufip2	3UTRs	No_boundary
chr8	33797776	33797876	101	-	1000	9.58855	4.72	5	Rbpms	introns	No_boundary
chr16	57363760	57363873	114	+	1000	9.57595	4.06	4.67	Filip1l	introns	No_boundary
chr10	3402279	3402475	197	+	1000	9.54763	4.11	4.73	Ppp1r14c	introns	No_boundary
chr5	66988166	66988324	159	+	1000	9.54763	4.14	4.76	Limch1	introns	No_boundary
chr1	43129363	43129504	142	-	1000	9.53642	5	5	Fhl2	introns	No_boundary
chr11	77711634	77711683	50	+	1000	9.52687	4.19	4.81	Nufip2	3UTRs	No_boundary
chr6	120938257	120938365	109	-	1000	9.52687	4.57	5	Mical3	introns	No_boundary
chr9	68749578	68749683	106	+	1000	9.52687	4.32	4.93	Rora	introns	No_boundary
chr11	104583517	104583624	108	+	1000	9.52116	4.04	4.65	Myl4	introns	No_boundary
chr7	122080438	122080533	96	+	1000	9.50386	5	5	Ubfd1	3UTRs	No_boundary
chr1	43163175	43163361	187	-	1000	9.48798	5	5	Fhl2	introns	No_boundary
chr13	12040653	12040802	150	-	1000	9.47933	4.7	5	Ryr2	introns	No_boundary
chr19	40319405	40319586	182	-	1000	9.47905	4.89	5	Sorbs1	introns	No_boundary
chr14	54955810	54955895	86	-	1000	9.47514	4.98	5	Myh6	introns	No_boundary
chr8	61800154	61800324	171	-	1000	9.46858	4.02	4.63	Palld	introns	No_boundary
chr12	103339268	103339394	127	-	1000	9.46468	4.95	5	Asb2	introns	No_boundary
chr13	12055187	12055240	54	-	1000	9.46415	4.76	5	Ryr2	introns	No_boundary
chr17	43910670	43910848	179	+	1000	9.46367	4.4	5	Rcan2	introns	No_boundary
chr13	12339404	12339573	170	-	1000	9.46216	4.55	5	Actn2	introns	No_boundary
chr18	80310811	80310955	145	-	1000	9.4602	4.11	4.72	Kcng2	introns	No_boundary
chr3	123189033	123189097	65	-	1000	9.4602	4.87	5	Synpo2	introns	No_boundary
chr7	81086794	81086890	97	+	1000	9.4602	4.64	5	Alpk3	introns	No_boundary
chr15	27490608	27490707	100	+	1000	9.44155	4.13	4.74	Ank	introns	No_boundary
chr18	65285245	65285391	147	-	1000	9.44155	4.62	5	Alpk2	introns	No_boundary
chr4	116366416	116366543	128	-	1000	9.44155	4.56	5	Mast2	introns	No_boundary
chr8	13249737	13249875	139	-	1000	9.44155	4.56	5	Adprhl1	introns	No_boundary
chr18	80337017	80337138	122	-	1000	9.43904	4.04	4.65	Kcng2	introns	No_boundary
chr3	137910732	137910888	157	+	1000	9.43904	4.08	4.7	Dnajb14	3UTRs	No_boundary
chr13	12088721	12088791	71	-	1000	9.41936	5	5	Ryr2	introns	No_boundary
chr15	27489302	27489399	98	+	1000	9.41717	4.69	5	Ank	introns	No_boundary
chr15	76181905	76182095	191	-	1000	9.41717	4.25	4.87	Plec	introns	Intron_exon_boundary
chr5	110225152	110225382	231	+	1000	9.41717	4.12	4.73	Golga3	3UTRs	No_boundary
chr14	34588488	34588495	8	-	1000	9.40973	4.86	5	Ldb3	5UTRs	Exon_intron_boundary
chr11	52388598	52388674	77	+	1000	9.37601	4.68	5	Vdac1	3UTRs	Intron_exon_boundary
chr13	11810425	11810529	105	-	1000	9.3704	4.09	4.7	Ryr2	introns	No_boundary
chr17	81645973	81646147	175	-	1000	9.35434	4.79	5	Slc8a1	introns	No_boundary
chr13	12101151	12101225	75	-	1000	9.3527	5	5	Ryr2	introns	No_boundary
chr11	3525341	3525688	348	-	1000	9.34772	4.79	5	Smtn	introns	No_boundary
chr18	5077628	5077821	194	+	1000	9.34522	4.17	4.79	Svil	introns	No_boundary
chr18	80337323	80337414	92	-	1000	9.33066	4.43	5	Kcng2	introns	No_boundary
chr3	102090926	102091029	104	+	1000	9.33066	4.64	5	Casq2	introns	No_boundary
chr2	91118266	91118421	156	+	1000	9.32107	4.87	5	Mybpc3	introns	Exon_intron_boundary
chr18	80303758	80303870	113	-	1000	9.31743	4.83	5	Kcng2	introns	No_boundary
chr19	53682840	53682910	71	+	1000	9.31743	4.39	4.99	Rbm20	introns	No_boundary
chr6	36463668	36463835	168	+	1000	9.31743	4	4.61	Chrm2	introns	No_boundary
chr4	114416018	114416182	165	+	1000	9.31194	4.05	4.66	Trabd2b	introns	No_boundary
chr8	61594446	61594566	121	-	1000	9.31194	4.03	4.64	Palld	introns	No_boundary
chr11	59062868	59062995	128	-	1000	9.29073	4.99	5	Obscn	cds	Intron_exon_boundary
chr5	122473424	122473661	238	-	1000	9.28798	4.04	4.65	Atp2a2	introns	Intron_exon_boundary
chr16	57463443	57463572	130	+	1000	9.28319	4.34	4.95	Filip1l	introns	No_boundary
chr7	81086141	81086209	69	+	1000	9.28319	4.63	5	Alpk3	introns	No_boundary
chr13	12052450	12052525	76	-	1000	9.26719	4.91	5	Ryr2	introns	No_boundary
chr11	65220626	65220821	196	-	1000	9.26684	4.09	4.7	Myocd	introns	No_boundary
chr15	103191608	103191814	207	-	1000	9.26684	3.98	4.6	Cbx5	3UTRs	No_boundary
chr19	5826906	5826954	49	-	1000	9.26275	5	5	NA	introns	No_boundary
chr17	24732175	24732354	180	+	1000	9.24399	3.99	4.6	Rpl3l	cds	Exon_intron_boundary
chr2	37372920	37373027	108	-	1000	9.23707	4.98	5	Rc3h2	3UTRs	No_boundary
chr7	19411460	19411599	140	+	1000	9.22852	4.52	5	Ckm	introns	No_boundary
chr16	8848901	8849043	143	+	1000	9.22635	4.65	5	1810013L24Rik	introns	No_boundary
chr7	81602353	81602475	123	-	1000	9.22635	4.14	4.76	Homer2	3UTRs	No_boundary
chr19	53686776	53686876	101	+	1000	9.22385	4.8	5	Rbm20	introns	No_boundary
chr13	12081808	12081852	45	-	1000	9.21408	4.84	5	Ryr2	introns	No_boundary
chr12	102784848	102784989	142	-	1000	9.20488	4.73	5	Btbd7	3UTRs	No_boundary
chr19	53737040	53737213	174	+	1000	9.20488	4.43	5	Rbm20	introns	No_boundary
chr18	61360121	61360209	89	-	1000	9.20332	4.09	4.7	Ppargc1b	introns	No_boundary
chr9	66064224	66064326	103	+	1000	9.20332	4.2	4.83	Ppib	introns	No_boundary
chr11	35790139	35790251	113	+	1000	9.203	4.54	5	Pank3	3UTRs	No_boundary
chr13	98843177	98843291	115	-	1000	9.203	4.67	5	Tnpo1	3UTRs	No_boundary
chr14	20664545	20664687	143	-	1000	9.203	4.34	4.94	Synpo2l	5UTRs	Exon_intron_boundary
chr16	57481483	57481586	104	+	1000	9.203	4.7	5	Filip1l	introns	No_boundary
chr19	53830914	53830989	76	+	1000	9.203	4.47	5	Rbm20	introns	No_boundary
chr3	123231555	123231617	63	-	1000	9.203	4.02	4.63	Synpo2	introns	No_boundary
chr8	61614925	61615191	267	-	1000	9.203	4.07	4.68	Palld	introns	No_boundary
chr13	91862509	91862641	133	-	1000	9.2026	4.77	5	Ckmt2	introns	No_boundary
chr12	103354690	103354837	148	-	1000	9.18581	4.52	5	Asb2	introns	No_boundary
chr7	81610067	81610228	162	-	1000	9.18581	4.37	4.98	Homer2	3UTRs	No_boundary
chr19	40327044	40327220	177	-	1000	9.18234	4.74	5	Sorbs1	introns	No_boundary
chr2	132571764	132571936	173	-	1000	9.18234	4.47	5	Gpcpd1	introns	No_boundary
chr5	131650004	131650187	184	-	1000	9.18234	4.64	5	Auts2	introns	No_boundary
chr16	57402850	57402955	106	+	1000	9.18206	4.23	4.85	Filip1l	introns	No_boundary
chr3	97749421	97749580	160	-	1000	9.18206	4.69	5	Pde4dip	introns	No_boundary
chr4	141653832	141653948	117	-	1000	9.18206	4.09	4.7	Plekhm2	introns	No_boundary
chr7	30957571	30957838	268	+	1000	9.18206	4.14	4.77	NA	introns	Exon_intron_boundary
chr9	67046545	67046621	77	-	1000	9.18206	4.66	5	Tpm1	introns	No_boundary
chr11	88340921	88341040	120	-	1000	9.17027	5	5	Msi2	3UTRs	No_boundary
chr13	11689971	11690110	140	-	1000	9.17027	5	5	Ryr2	introns	Exon_intron_boundary
chr13	12021107	12021302	196	-	1000	9.16908	4.67	5	Ryr2	introns	No_boundary
chr2	6933720	6933914	195	-	1000	9.16731	3.98	4.59	Celf2	introns	No_boundary
chr19	53727678	53727793	116	+	1000	9.15742	4.7	5	Rbm20	introns	No_boundary
chr13	12064429	12064495	67	-	1000	9.15061	4.89	5	Ryr2	introns	No_boundary
chr14	120431412	120431650	239	+	1000	9.14837	4.01	4.62	Mbnl2	3UTRs	Exon_intron_boundary
chr8	71569274	71569387	114	+	1000	9.14126	4.55	5	Slc27a1	5UTRs	Exon_intron_boundary
chr16	8847382	8847566	185	+	1000	9.13717	4.73	5	1810013L24Rik	introns	No_boundary
chr13	12046725	12046840	116	-	1000	9.11835	4.91	5	Ryr2	introns	No_boundary
chr19	40318308	40318957	650	-	1000	9.11473	4.78	5	Sorbs1	introns	No_boundary
chr3	123174971	123175144	174	-	1000	9.1101	3.97	4.58	Synpo2	introns	No_boundary
chr8	71569474	71569609	136	+	1000	9.10291	4.49	5	Slc27a1	introns	No_boundary
chr9	77332168	77332326	159	-	1000	9.10285	4.11	4.72	Mlip	introns	No_boundary
chr13	46422453	46422618	166	+	1000	9.09141	4.92	5	Rbm24	introns	No_boundary
chr5	122500363	122500592	230	-	1000	9.08183	4.34	4.95	Atp2a2	introns	Exon_intron_boundary
chr9	110767296	110767367	72	+	1000	9.08183	4.66	5	Myl3	introns	No_boundary
chr19	53743331	53743410	80	+	1000	9.07203	4.74	5	Rbm20	introns	No_boundary
chr1	73947301	73947505	205	-	1000	9.07199	4.01	4.62	Tns1	introns	No_boundary
chr13	11994820	11994924	105	-	1000	9.06015	4.24	4.86	Ryr2	introns	No_boundary
chr13	12093750	12093902	153	-	1000	9.05893	5	5	Ryr2	introns	No_boundary
chr2	37370137	37370225	89	-	1000	9.05546	4.56	5	Rc3h2	3UTRs	No_boundary
chr9	20435279	20435403	125	-	1000	9.05546	4.83	5	Zfp26	3UTRs	No_boundary
chr18	61397548	61397690	143	-	1000	9.04079	4.55	5	Ppargc1b	introns	No_boundary
chr19	53733554	53733710	157	+	1000	9.04079	4.81	5	Rbm20	introns	No_boundary
chr10	63872405	63872494	90	+	1000	9.03514	4.53	5	Ctnna3	introns	No_boundary
chr3	31120256	31120377	122	+	1000	9.03514	4.68	5	Skil	3UTRs	No_boundary
chr18	24824707	24824855	149	+	1000	9.03408	4.71	5	Fhod3	introns	No_boundary
chr19	53700202	53700277	76	+	1000	9.03408	4.39	4.99	Rbm20	introns	No_boundary
chr13	108462504	108462618	115	+	1000	9.0276	4.57	5	Pde4d	introns	No_boundary
chr5	67024040	67024119	80	+	1000	9.02464	4.02	4.63	Limch1	introns	No_boundary
chr13	101757631	101757816	186	-	1000	9.02435	4.38	4.99	Pik3r1	cds	No_boundary
chr13	49093830	49093970	141	-	1000	9.02418	4.03	4.64	Wnk2	introns	No_boundary
chr5	66755998	66756139	142	+	1000	9.02319	4.94	5	Limch1	introns	No_boundary
chr6	118631797	118631883	87	-	1000	9.02319	4.11	4.72	Cacna1c	introns	No_boundary
chr13	12005821	12005911	91	-	1000	9.00978	4.93	5	Ryr2	introns	No_boundary
chr13	12285979	12286088	110	-	1000	9.00978	4.71	5	Actn2	introns	No_boundary
chr19	40330637	40330743	107	-	1000	9.00123	4.84	5	Sorbs1	introns	No_boundary
chr14	101884919	101885432	514	+	1000	8.97461	4.97	5	Lmo7	cds	Exon_intron_boundary
chr16	37883044	37883137	94	+	1000	8.96233	3.97	4.58	Lrrc58	3UTRs	No_boundary
chr12	82794455	82794570	116	+	1000	8.96045	4.46	5	Rgs6	introns	No_boundary
chr9	44090519	44090602	84	+	1000	8.96045	3.93	4.54	Usp2	introns	No_boundary
chr9	68988199	68988353	155	+	1000	8.96045	4.37	4.97	Rora	introns	No_boundary
chr3	123231329	123231388	60	-	1000	8.94326	4.44	5	Synpo2	introns	No_boundary
chr7	122080714	122080848	135	+	1000	8.94326	5	5	Ubfd1	3UTRs	No_boundary
chr4	114416808	114416904	97	+	1000	8.94133	4.79	5	Trabd2b	introns	No_boundary
chr13	12019522	12019644	123	-	1000	8.916	4.76	5	Ryr2	introns	No_boundary
chr13	12046531	12046610	80	-	1000	8.916	4.6	5	Ryr2	introns	No_boundary
chr19	53754714	53754775	62	+	1000	8.90609	4.73	5	Rbm20	introns	No_boundary
chr6	118753608	118753880	273	-	1000	8.90609	4.36	4.96	Cacna1c	introns	No_boundary
chr2	155388051	155388134	84	+	1000	8.90358	4.42	5	Trp53inp2	3UTRs	No_boundary
chr1	43156556	43156609	54	-	1000	8.88589	4.6	5	Fhl2	introns	No_boundary
chr16	57412147	57412273	127	+	1000	8.88589	4.54	5	Filip1l	introns	No_boundary
chr7	81601479	81601622	144	-	1000	8.88589	4.72	5	Homer2	3UTRs	No_boundary
chr1	131932790	131932886	97	+	1000	8.88303	4.58	5	Nucks1	3UTRs	No_boundary
chr1	43133845	43133924	80	-	1000	8.88303	4.79	5	Fhl2	introns	No_boundary
chr18	61396985	61397113	129	-	1000	8.88303	4.09	4.7	Ppargc1b	introns	No_boundary
chr3	102120339	102120444	106	+	1000	8.88303	4.58	5	Casq2	introns	No_boundary
chr13	108463240	108463403	164	+	1000	8.87913	4.86	5	Pde4d	introns	No_boundary
chr13	12058979	12059048	70	-	1000	8.87703	4.84	5	Ryr2	introns	No_boundary
chr17	81508924	81509134	211	-	1000	8.87621	4.82	5	Slc8a1	introns	No_boundary
chr6	120968955	120969076	122	-	1000	8.87621	4.72	5	Mical3	introns	No_boundary
chr11	59057533	59057624	92	-	1000	8.87566	4.56	5	Obscn	introns	No_boundary
chr16	8844536	8844647	112	+	1000	8.87566	4.46	5	1810013L24Rik	introns	No_boundary
chr17	71083584	71083667	84	+	1000	8.87566	4.79	5	Myom1	introns	No_boundary
chr16	43621211	43621375	165	+	1000	8.87128	4.6	5	Zbtb20	3UTRs	No_boundary
chr11	59056471	59056579	109	-	1000	8.86554	4.86	5	Obscn	introns	No_boundary
chr17	43917460	43917694	235	+	1000	8.83535	4.52	5	Rcan2	introns	No_boundary
chr13	12096036	12096322	287	-	1000	8.8347	5	5	Ryr2	introns	No_boundary
chr13	12089543	12089595	53	-	1000	8.81813	4.88	5	Ryr2	introns	No_boundary
chr2	163359204	163359309	106	-	1000	8.81787	4.37	4.97	Jph2	introns	No_boundary
chr1	43146422	43146503	82	-	1000	8.81197	4.02	4.63	Fhl2	introns	No_boundary
chr16	43630535	43630688	154	+	1000	8.78677	4.5	5	Zbtb20	3UTRs	No_boundary
chr14	54955980	54956114	135	-	1000	8.78273	5	5	Myh6	introns	No_boundary
chr1	143604040	143604127	88	-	1000	8.78264	4.84	5	Cdc73	3UTRs	No_boundary
chr18	44419262	44419431	170	+	1000	8.78264	4.48	5	Dcp2	3UTRs	No_boundary
chr2	39196742	39196854	113	-	1000	8.78264	4.53	5	Ppp6c	3UTRs	No_boundary
chr6	71389763	71389790	28	-	1000	8.78264	4.7	5	Rmnd5a	3UTRs	No_boundary
chr9	77255287	77255500	214	-	1000	8.78264	4.32	4.93	Mlip	introns	No_boundary
chr5	150306708	150306996	289	+	1000	8.77879	3.95	4.56	Fry	introns	No_boundary
chr2	39196994	39197190	197	-	1000	8.77575	4.31	4.93	Ppp6c	3UTRs	No_boundary
chr19	53698219	53698327	109	+	1000	8.75679	3.97	4.58	Rbm20	introns	No_boundary
chr2	11722212	11722418	207	+	1000	8.75679	4.73	5	Il15ra	introns	No_boundary
chr5	122474505	122474570	66	-	1000	8.75679	4.56	5	Atp2a2	introns	No_boundary
chr1	170197150	170197287	138	-	1000	8.75508	3.98	4.59	Uhmk1	3UTRs	No_boundary
chr8	71570226	71570331	106	+	1000	8.75508	3.95	4.56	Slc27a1	5UTRs	Exon_intron_boundary
chr2	6544282	6544400	119	-	1000	8.75409	3.94	4.55	Celf2	3UTRs	No_boundary
chr19	40320626	40320858	233	-	1000	8.73857	4.48	5	Sorbs1	introns	No_boundary
chr8	15062056	15062187	132	+	1000	8.73857	4.73	5	Myom2	introns	No_boundary
chr3	97728873	97729153	281	-	1000	8.73781	4.64	5	Pde4dip	introns	No_boundary
chr8	61663757	61663875	119	-	1000	8.73781	4.35	4.95	Palld	introns	No_boundary
chr9	42964783	42964853	71	-	1000	8.73781	4.7	5	Arhgef12	3UTRs	No_boundary
chr11	53418645	53418826	182	+	1000	8.73007	3.91	4.52	Aff4	3UTRs	No_boundary
chr17	32773113	32773244	132	-	1000	8.73	4.93	5	Zfp871	3UTRs	No_boundary
chr19	40320265	40320338	74	-	1000	8.72934	4.71	5	Sorbs1	introns	No_boundary
chr6	118634413	118634579	167	-	1000	8.72934	4.95	5	Cacna1c	introns	No_boundary
chr1	73952213	73952357	145	-	1000	8.72131	4.56	5	Tns1	introns	Exon_intron_boundary
chr13	12044584	12044696	113	-	1000	8.72049	4.87	5	Ryr2	introns	No_boundary
chr13	12003167	12003218	52	-	1000	8.7139	4.11	4.72	Ryr2	introns	No_boundary
chr6	14729238	14729376	139	-	1000	8.7139	4.6	5	Ppp1r3a	introns	No_boundary
chr6	120936700	120936814	115	-	1000	8.7139	4.08	4.69	Mical3	introns	No_boundary
chr14	101594671	101594791	121	-	1000	8.71249	4.45	5	Tbc1d4	introns	No_boundary
chr18	80359152	80359257	106	-	1000	8.71249	4.21	4.84	Kcng2	introns	No_boundary
chr3	123166292	123166374	83	-	1000	8.71249	4.71	5	Synpo2	introns	No_boundary
chr5	43286669	43286772	104	+	1000	8.71249	4.57	5	Cpeb2	3UTRs	No_boundary
chr6	71392387	71392412	26	-	1000	8.71249	4.89	5	Rmnd5a	3UTRs	No_boundary
chr6	118747621	118747688	68	-	1000	8.71249	4.55	5	Cacna1c	introns	No_boundary
chr8	61807518	61807798	281	-	1000	8.71249	4.13	4.75	Palld	introns	No_boundary
chr2	30368377	30368618	242	+	1000	8.70419	3.94	4.55	Miga2	5UTRs	No_boundary
chr3	123228955	123229049	95	-	1000	8.70419	3.87	4.48	Synpo2	introns	No_boundary
chr13	12031231	12031310	80	-	1000	8.70196	4.68	5	Ryr2	introns	No_boundary
chr18	32232736	32232884	149	+	1000	8.70082	4.29	4.9	Map3k2	3UTRs	No_boundary
chr14	101593603	101593873	271	-	1000	8.69757	4.16	4.78	Tbc1d4	introns	No_boundary
chr7	81085416	81085488	73	+	1000	8.69757	4.73	5	Alpk3	introns	No_boundary
chr9	119519775	119519878	104	-	1000	8.69757	4.32	4.93	Scn5a	introns	No_boundary
chr18	61366537	61366646	110	-	1000	8.69499	4.52	5	Ppargc1b	introns	No_boundary
chr14	103292498	103292686	189	-	1000	8.6851	3.9	4.5	Mycbp2	introns	No_boundary
chr13	65302931	65302979	49	+	1000	8.67427	4.13	4.74	Zfp369	introns	No_boundary
chr3	101603732	101603811	80	-	1000	8.67427	4.17	4.8	Atp1a1	introns	No_boundary
chr8	80770567	80770702	136	-	1000	8.67427	4.35	4.96	Gab1	introns	No_boundary
chr9	119519983	119520152	170	-	1000	8.67427	4.69	5	Scn5a	introns	No_boundary
chr17	43884360	43884594	235	+	1000	8.66352	3.92	4.52	Rcan2	introns	No_boundary
chr1	73937354	73937455	102	-	1000	8.662	4.57	5	Tns1	introns	Exon_intron_boundary
chr13	12075471	12075638	168	-	1000	8.63614	4.53	5	Ryr2	introns	No_boundary
chr17	81635986	81636124	139	-	1000	8.63594	4.45	5	Slc8a1	introns	No_boundary
chr8	45687323	45687489	167	+	1000	8.63594	4.4	5	Sorbs2	introns	No_boundary
chr19	40339301	40339404	104	-	1000	8.6338	4.36	4.97	Sorbs1	introns	No_boundary
chr19	53687258	53687363	106	+	1000	8.62982	4.84	5	Rbm20	introns	No_boundary
chr12	78254514	78254745	232	+	1000	8.61101	4.02	4.63	Gphn	introns	No_boundary
chr3	102120523	102120698	176	+	1000	8.61101	3.89	4.49	Casq2	introns	No_boundary
chr19	53719765	53719846	82	+	1000	8.60751	4.22	4.84	Rbm20	introns	No_boundary
chr13	12067569	12067742	174	-	1000	8.59695	4.91	5	Ryr2	introns	No_boundary
chr13	12005276	12005441	166	-	1000	8.59486	3.9	4.51	Ryr2	introns	No_boundary
chr2	91126871	91127011	141	+	1000	8.59486	4.66	5	Mybpc3	introns	No_boundary
chr13	12030944	12031142	199	-	1000	8.59426	4.53	5	Ryr2	introns	No_boundary
chr6	71389971	71390095	125	-	1000	8.59426	4.73	5	Rmnd5a	3UTRs	No_boundary
chr1	43158791	43158818	28	-	1000	8.58978	4.37	4.97	Fhl2	introns	No_boundary
chr16	57396190	57396370	181	+	1000	8.58978	4.77	5	Filip1l	introns	No_boundary
chr5	122104593	122104677	85	+	1000	8.58978	4.47	5	Myl2	cds	Exon_intron_boundary
chr9	67032229	67032438	210	-	1000	8.58978	4.64	5	Tpm1	introns	Exon_intron_boundary
chr3	102091849	102091952	104	+	1000	8.58446	4.67	5	Casq2	introns	No_boundary
chr10	63872870	63873063	194	+	1000	8.58256	4.77	5	Ctnna3	introns	No_boundary
chr13	12039581	12039697	117	-	1000	8.58256	4.42	5	Ryr2	introns	No_boundary
chr16	57415988	57416102	115	+	1000	8.58256	4.41	5	Filip1l	introns	No_boundary
chr19	53707335	53707467	133	+	1000	8.57491	4.84	5	Rbm20	introns	No_boundary
chr13	12005491	12005574	84	-	1000	8.56881	4.34	4.95	Ryr2	introns	No_boundary
chr9	67030381	67030487	107	-	1000	8.55304	4.59	5	Tpm1	introns	No_boundary
chr1	190120526	190120622	97	-	1000	8.54298	4.11	4.73	Prox1	3UTRs	No_boundary
chr10	63904340	63904618	279	+	1000	8.54298	4.53	5	Ctnna3	introns	No_boundary
chr10	70014597	70014649	53	+	1000	8.54298	4.68	5	Ank3	introns	No_boundary
chr16	35288361	35288482	122	+	1000	8.54298	4.39	5	Adcy5	introns	No_boundary
chr4	46097948	46098087	140	+	1000	8.54298	4.01	4.62	Tmod1	introns	No_boundary
chr1	143603964	143604039	76	-	1000	8.52572	4.61	5	Cdc73	3UTRs	No_boundary
chr1	189893968	189894053	86	-	1000	8.52572	4.59	5	Smyd2	introns	No_boundary
chr10	70008763	70008834	72	+	1000	8.52572	4.5	5	Ank3	cds	Exon_intron_boundary
chr10	95309296	95309441	146	-	1000	8.52572	4.93	5	Cradd	introns	No_boundary
chr16	57487278	57487401	124	+	1000	8.52572	4.3	4.91	Filip1l	introns	No_boundary
chr19	53772952	53773024	73	+	1000	8.52572	4.09	4.71	Rbm20	introns	No_boundary
chr2	77076715	77076872	158	-	1000	8.52572	4.33	4.94	Ccdc141	introns	No_boundary
chr2	150650020	150650153	134	-	1000	8.52572	4.03	4.64	Acss1	introns	No_boundary
chr5	72383554	72383619	66	-	1000	8.52572	4.01	4.61	Corin	introns	No_boundary
chr7	130735367	130735533	167	+	1000	8.52139	4.61	5	Tacc2	introns	No_boundary
[truncated: 85,387 more rows]

## Sheet: Annotated_ECLIP_OB_ClipperPeaks
seqnames	start	end	width	strand	score	log10pvalue	LocalIDR	GlobalIDR	annot.symbol	annot.type	annotation.boundary
chr10	40258525	40258567	43	+	1000	400	4.31	4.44	Snord3a	exons	Exon_intron_boundary
chr10	40258568	40258587	20	+	1000	400	4.33	4.45	Snord3a	exons	Exon_intron_boundary
chr10	40258588	40258590	3	+	1000	400	4.25	4.4	Snord3a	exons	Exon_intron_boundary
chr10	40258604	40258605	2	+	1000	400	4.37	4.48	Snord3a	exons	Exon_intron_boundary
chr10	40258606	40258646	41	+	1000	400	4.07	4.26	Snord3a	exons	Exon_intron_boundary
chr11	69073480	69073509	30	+	1000	400	4.54	4.61	Snord118	exons	Exon_intron_boundary
chr11	69073510	69073553	44	+	1000	400	4.14	4.31	Snord118	exons	Exon_intron_boundary
chr12	78350922	78350938	17	+	1000	400	4.41	4.53	Gphn	introns	No_boundary
chr12	78350939	78351003	65	+	1000	400	4.69	4.71	Gphn	introns	No_boundary
chr12	78351057	78351121	65	+	1000	400	4.21	4.37	Gphn	introns	No_boundary
chr16	35981687	35981741	55	-	1000	400	4.25	4.4	NA	introns	Exon_intron_boundary
chr16	35981742	35981786	45	-	1000	400	4.1	4.29	NA	exons	Exon_intron_boundary
chr16	57391594	57391603	10	-	1000	400	4.59	4.64	Cmss1	introns	No_boundary
chr17	39843184	39843194	11	+	1000	400	4.64	4.67	Rn45s	exons	No_boundary
chr17	39843195	39843214	20	+	1000	400	4.14	4.31	Rn45s	exons	No_boundary
chr17	39843215	39843240	26	+	1000	400	4.02	4.24	Rn45s	exons	No_boundary
chr17	39843281	39843283	3	+	1000	400	4.02	4.24	Rn45s	exons	No_boundary
chr17	39843298	39843313	16	+	1000	400	4.47	4.56	Rn45s	exons	No_boundary
chr17	39843329	39843336	8	+	1000	400	4.37	4.49	Rn45s	exons	No_boundary
chr17	39843337	39843347	11	+	1000	400	4.37	4.48	Rn45s	exons	No_boundary
chr17	39843357	39843362	6	+	1000	400	4.57	4.62	Rn45s	exons	No_boundary
chr17	39843363	39843382	20	+	1000	400	4.39	4.5	Rn45s	exons	No_boundary
chr17	39843383	39843385	3	+	1000	400	4.48	4.57	Rn45s	exons	No_boundary
chr17	39843386	39843418	33	+	1000	400	4.22	4.38	Rn45s	exons	No_boundary
chr17	39843419	39843421	3	+	1000	400	4.26	4.41	Rn45s	exons	No_boundary
chr17	39843422	39843426	5	+	1000	400	4.22	4.38	Rn45s	exons	No_boundary
chr17	39843427	39843431	5	+	1000	400	4.02	4.23	Rn45s	exons	No_boundary
chr17	39843432	39843433	2	+	1000	400	4.37	4.49	Rn45s	exons	No_boundary
chr17	39843434	39843439	6	+	1000	400	4.08	4.27	Rn45s	exons	No_boundary
chr17	39843440	39843453	14	+	1000	400	4.38	4.5	Rn45s	exons	No_boundary
chr17	39843454	39843482	29	+	1000	400	4.55	4.61	Rn45s	exons	No_boundary
chr17	39843483	39843496	14	+	1000	400	4.48	4.57	Rn45s	exons	No_boundary
chr17	39843497	39843513	17	+	1000	400	4.22	4.38	Rn45s	exons	No_boundary
chr17	39843514	39843522	9	+	1000	400	4.08	4.27	Rn45s	exons	No_boundary
chr17	39843523	39843524	2	+	1000	400	4.01	4.23	Rn45s	exons	No_boundary
chr17	39843525	39843530	6	+	1000	400	4.15	4.32	Rn45s	exons	No_boundary
chr17	39843531	39843536	6	+	1000	400	4.33	4.45	Rn45s	exons	No_boundary
chr17	39843537	39843554	18	+	1000	400	4.27	4.42	Rn45s	exons	No_boundary
chr17	39844109	39844120	12	+	1000	400	4.53	4.59	Rn45s	exons	No_boundary
chr17	39844123	39844151	29	+	1000	400	4.34	4.46	Rn45s	exons	No_boundary
chr17	39844294	39844299	6	+	1000	400	4.19	4.36	Rn45s	exons	No_boundary
chr17	39844300	39844307	8	+	1000	400	4.07	4.26	Rn45s	exons	No_boundary
chr17	39845602	39845612	11	+	1000	400	4.34	4.46	Rn45s	exons	No_boundary
chr17	39845613	39845623	11	+	1000	400	4.46	4.55	Rn45s	exons	No_boundary
chr17	39845624	39845665	42	+	1000	400	4.19	4.35	Rn45s	exons	No_boundary
chr17	39845666	39845678	13	+	1000	400	4.16	4.33	Rn45s	exons	No_boundary
chr17	39845916	39845920	5	+	1000	400	4.32	4.44	Rn45s	exons	Exon_intron_boundary
chr17	39846016	39846023	8	+	1000	400	4.19	4.35	Rn45s	exons	Exon_intron_boundary
chr17	39846024	39846044	21	+	1000	400	4.12	4.3	Rn45s	exons	Exon_intron_boundary
chr17	39846045	39846066	22	+	1000	400	4.23	4.39	Rn45s	exons	Exon_intron_boundary
chr17	39846067	39846069	3	+	1000	400	4.18	4.34	Rn45s	exons	Exon_intron_boundary
chr17	39846070	39846078	9	+	1000	400	4.09	4.27	Rn45s	exons	Exon_intron_boundary
chr17	39846079	39846084	6	+	1000	400	4.54	4.6	Rn45s	exons	Exon_intron_boundary
chr17	39846085	39846089	5	+	1000	400	4.38	4.49	Rn45s	exons	Exon_intron_boundary
chr17	39846090	39846098	9	+	1000	400	4.21	4.37	Rn45s	exons	Exon_intron_boundary
chr17	39847003	39847056	54	+	1000	400	4.25	4.4	Rn45s	exons	No_boundary
chr17	39847057	39847091	35	+	1000	400	4.2	4.37	Rn45s	exons	No_boundary
chr17	39847220	39847222	3	+	1000	400	4.02	4.23	Rn45s	exons	No_boundary
chr17	39847223	39847227	5	+	1000	400	4.13	4.3	Rn45s	exons	No_boundary
chr17	39847274	39847277	4	+	1000	400	4.1	4.29	Rn45s	exons	No_boundary
chr17	39847278	39847284	7	+	1000	400	4.11	4.29	Rn45s	exons	No_boundary
chr17	39847285	39847289	5	+	1000	400	4.24	4.4	Rn45s	exons	No_boundary
chr17	39847290	39847292	3	+	1000	400	4.16	4.33	Rn45s	exons	No_boundary
chr17	39847293	39847296	4	+	1000	400	4.23	4.39	Rn45s	exons	No_boundary
chr17	39847297	39847298	2	+	1000	400	4.02	4.24	Rn45s	exons	No_boundary
chr17	39847299	39847302	4	+	1000	400	4.41	4.52	Rn45s	exons	No_boundary
chr17	39847303	39847365	63	+	1000	400	4.34	4.46	Rn45s	exons	No_boundary
chr17	39847652	39847657	6	+	1000	400	4.02	4.24	Rn45s	exons	No_boundary
chr17	39847658	39847671	14	+	1000	400	4.31	4.43	Rn45s	exons	No_boundary
chr17	39847672	39847674	3	+	1000	400	4.12	4.3	Rn45s	exons	No_boundary
chr17	39847675	39847698	24	+	1000	400	4.49	4.58	Rn45s	exons	No_boundary
chr17	39847699	39847702	4	+	1000	400	4.53	4.6	Rn45s	exons	No_boundary
chr17	39847703	39847712	10	+	1000	400	4.72	4.72	Rn45s	exons	No_boundary
chr17	39847713	39847715	3	+	1000	400	4.13	4.31	Rn45s	exons	No_boundary
chr17	39847716	39847717	2	+	1000	400	4.33	4.45	Rn45s	exons	No_boundary
chr17	39847718	39847722	5	+	1000	400	4.04	4.25	Rn45s	exons	No_boundary
chr17	39847723	39847727	5	+	1000	400	4.06	4.26	Rn45s	exons	No_boundary
chr17	39847728	39847734	7	+	1000	400	4.05	4.25	Rn45s	exons	No_boundary
chr17	39847735	39847736	2	+	1000	400	4.23	4.39	Rn45s	exons	No_boundary
chr17	39847737	39847740	4	+	1000	400	4.35	4.47	Rn45s	exons	No_boundary
chr17	39847741	39847744	4	+	1000	400	4.09	4.28	Rn45s	exons	No_boundary
chr17	39847745	39847751	7	+	1000	400	4.39	4.5	Rn45s	exons	No_boundary
chr17	39847752	39847754	3	+	1000	400	4.06	4.26	Rn45s	exons	No_boundary
chr17	39847755	39847759	5	+	1000	400	4.18	4.34	Rn45s	exons	No_boundary
chr17	39847760	39847767	8	+	1000	400	4.18	4.35	Rn45s	exons	No_boundary
chr17	39847768	39847772	5	+	1000	400	4.36	4.47	Rn45s	exons	No_boundary
chr17	39847773	39847776	4	+	1000	400	4.09	4.27	Rn45s	exons	No_boundary
chr17	39847777	39847785	9	+	1000	400	4.12	4.3	Rn45s	exons	No_boundary
chr17	39847786	39847789	4	+	1000	400	4.59	4.65	Rn45s	exons	No_boundary
chr17	39847790	39847796	7	+	1000	400	4.4	4.51	Rn45s	exons	No_boundary
chr17	39847797	39847799	3	+	1000	400	4.42	4.53	Rn45s	exons	No_boundary
chr17	39847800	39847802	3	+	1000	400	4.27	4.42	Rn45s	exons	No_boundary
chr17	39847803	39847804	2	+	1000	400	4	4.22	Rn45s	exons	No_boundary
chr17	39847805	39847810	6	+	1000	400	4.33	4.44	Rn45s	exons	No_boundary
chr17	39847811	39847812	2	+	1000	400	4.09	4.28	Rn45s	exons	No_boundary
chr17	39847813	39847823	11	+	1000	400	4.31	4.43	Rn45s	exons	No_boundary
chr17	39847824	39847830	7	+	1000	400	4.44	4.54	Rn45s	exons	No_boundary
chr17	39847831	39847832	2	+	1000	400	4	4.23	Rn45s	exons	No_boundary
chr17	39847833	39847838	6	+	1000	400	4.29	4.42	Rn45s	exons	No_boundary
chr17	39847839	39847841	3	+	1000	400	4.16	4.33	Rn45s	exons	No_boundary
chr17	39847842	39847844	3	+	1000	400	4.57	4.62	Rn45s	exons	No_boundary
chr17	39847845	39847847	3	+	1000	400	4.12	4.3	Rn45s	exons	No_boundary
chr17	39847848	39847862	15	+	1000	400	4.3	4.43	Rn45s	exons	No_boundary
chr17	39847863	39847870	8	+	1000	400	4.46	4.56	Rn45s	exons	No_boundary
chr17	39847871	39847880	10	+	1000	400	4.19	4.35	Rn45s	exons	No_boundary
chr17	39847881	39847889	9	+	1000	400	4.37	4.48	Rn45s	exons	No_boundary
chr17	39847890	39847891	2	+	1000	400	4.43	4.53	Rn45s	exons	No_boundary
chr17	39847892	39847895	4	+	1000	400	4.26	4.41	Rn45s	exons	No_boundary
chr17	39847896	39847897	2	+	1000	400	4.13	4.31	Rn45s	exons	No_boundary
chr17	39847898	39847903	6	+	1000	400	4.45	4.55	Rn45s	exons	No_boundary
chr17	39847904	39847910	7	+	1000	400	4.09	4.27	Rn45s	exons	No_boundary
chr17	39847911	39847919	9	+	1000	400	4.5	4.58	Rn45s	exons	No_boundary
chr17	39847920	39847927	8	+	1000	400	4.31	4.43	Rn45s	exons	No_boundary
chr17	39847928	39847934	7	+	1000	400	4.1	4.29	Rn45s	exons	No_boundary
chr17	39847935	39847946	12	+	1000	400	4.58	4.63	Rn45s	exons	No_boundary
chr17	39848004	39848005	2	+	1000	400	4.63	4.66	Rn45s	exons	No_boundary
chr17	39848006	39848008	3	+	1000	400	4.34	4.46	Rn45s	exons	No_boundary
chr17	39848009	39848016	8	+	1000	400	4.16	4.34	Rn45s	exons	No_boundary
chr17	39848017	39848021	5	+	1000	400	4.59	4.64	Rn45s	exons	No_boundary
chr17	39848022	39848029	8	+	1000	400	4.27	4.41	Rn45s	exons	No_boundary
chr17	39848030	39848033	4	+	1000	400	4.4	4.51	Rn45s	exons	No_boundary
chr17	39848034	39848046	13	+	1000	400	4.22	4.39	Rn45s	exons	No_boundary
chr17	39848047	39848053	7	+	1000	400	4.52	4.59	Rn45s	exons	No_boundary
chr17	39848054	39848082	29	+	1000	400	4.16	4.34	Rn45s	exons	No_boundary
chr17	39848083	39848087	5	+	1000	400	4.05	4.26	Rn45s	exons	No_boundary
chr17	39848088	39848089	2	+	1000	400	4.41	4.52	Rn45s	exons	No_boundary
chr17	39848090	39848093	4	+	1000	400	4.08	4.27	Rn45s	exons	No_boundary
chr17	70963724	70963727	4	+	1000	400	4.2	4.36	NA	1to5kb	No_boundary
chr18	73533417	73533435	19	-	1000	400	4.25	4.41	NA	exons	Intron_exon_boundary
chr18	73533436	73533443	8	-	1000	400	4.34	4.45	NA	exons	Intron_exon_boundary
chr18	73533444	73533482	39	-	1000	400	4.2	4.36	NA	exons	Intron_exon_boundary
chr5	146260988	146261084	97	+	1000	400	4.05	4.25	Cdk8	introns	No_boundary
chr8	85111874	85111946	73	-	1000	400	4.03	4.24	Zfp791	introns	Exon_intron_boundary
chr9	123461944	123462012	69	+	1000	400	4.13	4.31	Lars2	3UTRs	Intron_exon_boundary
chr9	123462013	123462056	44	+	1000	400	4.15	4.32	Lars2	3UTRs	No_boundary
chr9	123462057	123462066	10	+	1000	400	4.32	4.44	Lars2	3UTRs	No_boundary
chr9	123462067	123462076	10	+	1000	400	4.15	4.32	Lars2	3UTRs	No_boundary
chr9	123462077	123462087	11	+	1000	400	4.64	4.68	Lars2	3UTRs	No_boundary
chr9	123462088	123462116	29	+	1000	400	4.35	4.47	Lars2	3UTRs	No_boundary
chr9	123462117	123462123	7	+	1000	400	4.28	4.42	Lars2	3UTRs	No_boundary
chr9	123462124	123462130	7	+	1000	400	4.45	4.54	Lars2	3UTRs	No_boundary
chr9	123462131	123462149	19	+	1000	400	4.09	4.28	Lars2	3UTRs	No_boundary
chr9	123462150	123462168	19	+	1000	400	4.19	4.35	Lars2	3UTRs	Exon_intron_boundary
chr17	39846099	39846108	10	+	1000	87.0815	4.16	4.32	Rn45s	exons	Exon_intron_boundary
chr17	39847950	39847952	3	+	1000	86.3589	4.12	4.3	Rn45s	exons	No_boundary
chr17	39847947	39847949	3	+	1000	82.6882	3.96	4.21	Rn45s	exons	No_boundary
chr17	39846109	39846111	3	+	1000	80.0653	4.09	4.28	Rn45s	exons	Exon_intron_boundary
chr17	39844086	39844108	23	+	1000	77.7012	3.99	4.22	Rn45s	exons	No_boundary
chr17	39845912	39845915	4	+	1000	77.1031	4	4.22	Rn45s	exons	Exon_intron_boundary
chr17	39846002	39846015	14	+	1000	76.933	4.2	4.36	Rn45s	exons	Exon_intron_boundary
chr17	39844077	39844085	9	+	1000	73.673	3.97	4.22	Rn45s	exons	No_boundary
chr17	39845859	39845866	8	+	1000	71.47	4.4	4.51	Rn45s	exons	Exon_intron_boundary
chr17	39845867	39845911	45	+	1000	68.3146	3.97	4.21	Rn45s	exons	Exon_intron_boundary
chr17	70963728	70963787	60	+	1000	67.7132	4.2	4.37	NA	1to5kb	No_boundary
chr17	70963788	70963790	3	+	1000	65.3095	3.97	4.21	NA	1to5kb	No_boundary
chr17	39846220	39846242	23	+	1000	61.713	4.22	4.38	Rn45s	exons	Exon_intron_boundary
chr5	146261200	146261208	9	+	1000	56.8643	4.11	4.29	Cdk8	introns	No_boundary
chr17	39847650	39847651	2	+	1000	55.3028	4.01	4.23	Rn45s	exons	No_boundary
chr17	39847953	39847956	4	+	1000	51.9616	4.16	4.33	Rn45s	exons	No_boundary
chr17	39846251	39846263	13	+	1000	42.8275	3.95	4.21	Rn45s	exons	Exon_intron_boundary
chr17	39846264	39846287	24	+	1000	42.2606	4.08	4.26	Rn45s	exons	Exon_intron_boundary
chr17	39846243	39846250	8	+	1000	38.9761	4.15	4.32	Rn45s	exons	Exon_intron_boundary
chr17	39847213	39847219	7	+	1000	38.5168	3.94	4.21	Rn45s	exons	No_boundary
chr17	39844265	39844293	29	+	1000	37.8568	4.03	4.24	Rn45s	exons	No_boundary
chr3	108554406	108554447	42	-	1000	36.1249	3.92	4.2	Scarna2	exons	Intron_exon_boundary
chr9	56223576	56223646	71	-	1000	36.0962	3.92	4.2	Peak1	introns	No_boundary
chr17	39847189	39847212	24	+	1000	35.5401	3.93	4.2	Rn45s	exons	No_boundary
chr3	108554531	108554569	39	-	1000	32.7193	3.92	4.19	Scarna2	exons	Intron_exon_boundary
chr17	39847228	39847233	6	+	1000	32.1111	4.16	4.34	Rn45s	exons	No_boundary
chr13	97190534	97190538	5	-	1000	30.856	3.92	4.2	Hexb	introns	No_boundary
chr19	5797912	5797956	45	-	1000	30.8354	4.04	4.25	Malat1	exons	No_boundary
chr8	31149881	31149933	53	-	1000	28.4261	3.92	4.2	Snord13	exons	Intron_exon_boundary
chr3	108554374	108554399	26	-	1000	25.4315	3.91	4.19	Scarna2	exons	Intron_exon_boundary
chr17	39845064	39845077	14	+	1000	24.4519	3.9	4.18	Rn45s	exons	No_boundary
chr8	85111947	85111963	17	-	1000	22.3224	3.89	4.18	Zfp791	introns	Exon_intron_boundary
chr10	23786477	23786520	44	-	1000	20.224	3.9	4.18	Rps12	introns	Exon_intron_boundary
chr17	39847957	39847959	3	+	1000	20.0198	4.09	4.28	Rn45s	exons	No_boundary
chr14	61024454	61024486	33	-	1000	19.8453	3.89	4.17	Tnfrsf19	introns	Exon_intron_boundary
chr14	61024487	61024536	50	-	1000	19.5302	3.88	4.17	Tnfrsf19	introns	Exon_intron_boundary
chr17	39845078	39845088	11	+	1000	18.7486	3.89	4.18	Rn45s	exons	No_boundary
chr1	155881894	155881962	69	-	1000	16.6402	3.86	4.16	Cep350	introns	No_boundary
chr6	94826826	94826884	59	-	1000	16.5279	3.88	4.17	NA	exons	Intron_exon_boundary
chr4	102216313	102216330	18	+	1000	16.4167	4.04	4.25	Pde4b	introns	No_boundary
chr7	45127387	45127438	52	-	1000	16.3572	3.9	4.19	Rpl13a	introns	Exon_intron_boundary
chr17	39844257	39844264	8	+	1000	15.8175	4.16	4.33	Rn45s	exons	No_boundary
chr1	168419924	168420025	102	-	1000	15.563	3.86	4.16	Pbx1	introns	No_boundary
chr1	168418538	168418635	98	-	1000	15.338	3.86	4.15	Pbx1	introns	No_boundary
chr17	39845089	39845099	11	+	1000	14.4001	3.85	4.15	Rn45s	exons	No_boundary
chr17	39847236	39847265	30	+	1000	14.3421	3.89	4.18	Rn45s	exons	No_boundary
chr1	168360586	168360689	104	-	1000	14.3344	3.85	4.14	Pbx1	introns	No_boundary
chr19	22852025	22852110	86	+	1000	14.1491	3.86	4.16	Trpm3	introns	No_boundary
chrX	73026615	73026699	85	+	1000	13.4506	3.84	4.14	Zfp185	introns	No_boundary
chr3	108554605	108554671	67	-	1000	13.1797	3.88	4.17	Scarna2	exons	Intron_exon_boundary
chr17	35247203	35247245	43	+	1000	13.1634	3.86	4.16	Ddx39b	introns	Exon_intron_boundary
chr1	168355105	168355224	120	-	1000	13.0798	3.83	4.13	Pbx1	introns	No_boundary
chr4	102379512	102379518	7	+	1000	12.1445	3.97	4.22	Pde4b	introns	No_boundary
chr1	168414060	168414233	174	-	1000	12.0764	3.82	4.12	Pbx1	introns	No_boundary
chr4	102379519	102379525	7	+	1000	11.8677	3.91	4.19	Pde4b	introns	No_boundary
chr17	39845111	39845115	5	+	1000	11.7463	3.85	4.15	Rn45s	exons	No_boundary
chr6	8728778	8728890	113	-	1000	11.7419	3.85	4.15	Ica1	introns	No_boundary
chr9	56223569	56223575	7	-	1000	11.7383	3.82	4.13	Peak1	introns	No_boundary
chr1	168289200	168289338	139	-	1000	11.5954	3.81	4.11	Pbx1	introns	No_boundary
chr1	161038073	161038160	88	+	1000	11.4861	3.84	4.14	Gas5	introns	Exon_intron_boundary
chr1	168358932	168359074	143	-	1000	11.2154	3.82	4.12	Pbx1	introns	No_boundary
chr1	168423621	168423722	102	-	1000	11.1393	3.83	4.13	Pbx1	introns	No_boundary
chr1	168413779	168413924	146	-	1000	11.0521	3.79	4.09	Pbx1	introns	No_boundary
chr5	146261209	146261212	4	+	1000	11.0425	3.85	4.15	Cdk8	introns	No_boundary
chr1	168331774	168331878	105	-	1000	10.9937	3.8	4.1	Pbx1	introns	No_boundary
chr17	70963694	70963723	30	+	1000	10.987	3.82	4.12	NA	1to5kb	No_boundary
chr5	146261216	146261219	4	+	1000	10.9409	3.85	4.14	Cdk8	introns	No_boundary
chr1	168413412	168413513	102	-	1000	10.7744	3.81	4.11	Pbx1	introns	No_boundary
chr5	100426884	100426964	81	-	1000	10.383	3.83	4.13	5430416N02Rik	introns	Intron_exon_boundary
chr1	168415237	168415279	43	-	1000	10.1313	3.79	4.09	Pbx1	introns	No_boundary
chr1	168372391	168372507	117	-	1000	10.0538	3.78	4.08	Pbx1	introns	No_boundary
chr18	63212037	63212129	93	-	1000	10.0101	3.79	4.09	Piezo2	introns	No_boundary
chr12	109567240	109567282	43	+	1000	9.98297	3.76	4.08	Meg3	introns	No_boundary
chr9	40804030	40804076	47	+	1000	9.9617	3.84	4.14	Hspa8	introns	Exon_intron_boundary
chr17	39845100	39845110	11	+	1000	9.77622	3.78	4.09	Rn45s	exons	No_boundary
chr1	168354248	168354358	111	-	1000	9.71429	3.82	4.12	Pbx1	introns	No_boundary
chr1	168423251	168423373	123	-	1000	9.60279	3.81	4.11	Pbx1	introns	No_boundary
chr1	168418938	168419012	75	-	1000	9.49652	3.79	4.1	Pbx1	introns	No_boundary
chr17	39847234	39847235	2	+	1000	9.3663	3.81	4.12	Rn45s	exons	No_boundary
chr1	168333486	168333644	159	-	1000	9.29204	3.79	4.1	Pbx1	introns	No_boundary
chr1	168344250	168344347	98	-	1000	9.24196	3.74	4.06	Pbx1	introns	No_boundary
chr5	27075734	27075841	108	+	1000	9.22308	3.76	4.08	Dpp6	introns	No_boundary
chr2	130277709	130277766	58	+	1000	9.16369	3.81	4.11	Nop56	introns	Exon_intron_boundary
chr5	146261213	146261215	3	+	1000	9.0919	3.81	4.11	Cdk8	introns	No_boundary
chr19	5844450	5844555	106	-	1000	9.06341	3.73	4.06	NA	introns	Exon_intron_boundary
chr1	168350600	168350703	104	-	1000	8.98974	3.76	4.07	Pbx1	introns	No_boundary
chr9	40803584	40803668	85	+	1000	8.98068	3.79	4.09	Hspa8	introns	Exon_intron_boundary
chr1	168356619	168356710	92	-	1000	8.94222	3.77	4.08	Pbx1	introns	No_boundary
chr9	34534344	34534435	92	+	1000	8.89777	3.72	4.05	Kirrel3	introns	No_boundary
chr2	102829383	102829447	65	-	1000	8.80115	3.8	4.1	Cd44	introns	No_boundary
chr2	102829373	102829382	10	-	1000	8.78885	3.8	4.1	Cd44	introns	No_boundary
chr1	168362753	168362812	60	-	1000	8.77206	3.7	4.03	Pbx1	introns	No_boundary
chr1	168330273	168330307	35	-	1000	8.7606	3.7	4.04	Pbx1	introns	No_boundary
chr1	168389084	168389234	151	-	1000	8.69105	3.76	4.08	Pbx1	introns	No_boundary
chr1	168418449	168418519	71	-	1000	8.67422	3.75	4.07	Pbx1	introns	No_boundary
chr1	168359138	168359210	73	-	1000	8.59676	3.7	4.04	Pbx1	introns	No_boundary
chr1	168416073	168416123	51	-	1000	8.54005	3.72	4.04	Pbx1	introns	No_boundary
chr17	23815699	23815899	201	+	1000	8.53428	3.74	4.06	Srrm2	cds	No_boundary
chr11	118583031	118583190	160	-	1000	8.52928	3.69	4.03	Rbfox3	introns	No_boundary
chr1	168385997	168386069	73	-	1000	8.29038	3.73	4.05	Pbx1	introns	No_boundary
chr1	168299871	168299960	90	-	1000	8.2801	3.67	4	Pbx1	introns	No_boundary
chr9	68666954	68667053	100	+	1000	8.21658	3.68	4.01	Rora	introns	No_boundary
chr9	34489922	34490006	85	+	1000	8.1849	3.72	4.05	Kirrel3	introns	No_boundary
chr19	5842955	5843139	185	-	1000	8.14666	3.72	4.05	Neat1	exons	No_boundary
chr1	168409211	168409341	131	-	1000	8.11703	3.74	4.07	Pbx1	introns	No_boundary
chr1	168426521	168426597	77	-	1000	8.0599	3.69	4.02	Pbx1	introns	No_boundary
chr1	168331628	168331703	76	-	1000	7.99581	3.71	4.04	Pbx1	introns	No_boundary
chr1	168389709	168389909	201	-	1000	7.85415	3.75	4.07	Pbx1	introns	No_boundary
chr1	168415563	168415645	83	-	1000	7.85331	3.66	3.99	Pbx1	introns	No_boundary
chr1	168343678	168343786	109	-	1000	7.79981	3.7	4.03	Pbx1	introns	No_boundary
chr9	34537139	34537300	162	+	1000	7.64882	3.65	3.98	Kirrel3	introns	No_boundary
chr1	168396542	168396675	134	-	1000	7.615	3.63	3.96	Pbx1	introns	No_boundary
chr1	168348614	168348688	75	-	1000	7.55136	3.69	4.02	Pbx1	introns	No_boundary
chr1	168360720	168360801	82	-	1000	7.52846	3.66	4	Pbx1	introns	No_boundary
chr1	168375086	168375241	156	-	1000	7.51863	3.68	4.02	Pbx1	introns	No_boundary
chr5	132190983	132191157	175	-	1000	7.51863	3.63	3.96	Auts2	introns	No_boundary
chr11	5989969	5990132	164	-	1000	7.513	3.74	4.06	Camk2b	introns	Exon_intron_boundary
chr1	168418893	168418937	45	-	1000	7.43167	3.68	4.01	Pbx1	introns	No_boundary
chr16	23108978	23109015	38	+	1000	7.42304	3.72	4.05	Eif4a2	introns	Exon_intron_boundary
chr1	168334217	168334289	73	-	1000	7.40681	3.68	4.02	Pbx1	introns	No_boundary
chr1	168415719	168415823	105	-	1000	7.40074	3.7	4.03	Pbx1	introns	No_boundary
chr1	168279912	168279978	67	-	1000	7.39047	3.59	3.94	Pbx1	introns	No_boundary
chr5	132484844	132484957	114	-	1000	7.36087	3.66	3.99	Auts2	introns	No_boundary
chr8	85053588	85053659	72	+	1000	7.33732	3.65	3.98	Tnpo2	introns	Exon_intron_boundary
chr1	168388968	168389053	86	-	1000	7.33325	3.67	4.01	Pbx1	introns	No_boundary
chr1	168391494	168391531	38	-	1000	7.30454	3.59	3.94	Pbx1	introns	No_boundary
chr1	168309649	168309736	88	-	1000	7.22871	3.65	3.98	Pbx1	introns	No_boundary
chr11	118574937	118575066	130	-	1000	7.19236	3.57	3.93	Rbfox3	introns	No_boundary
chr17	23817715	23817829	115	+	1000	7.18736	3.68	4.01	Srrm2	cds	No_boundary
chr7	44335100	44335237	138	+	1000	7.18187	3.64	3.97	Shank1	introns	No_boundary
chr7	99479567	99479709	143	-	1000	7.10199	3.74	4.07	Rps3	introns	Exon_intron_boundary
chr1	168382240	168382288	49	-	1000	7.1008	3.59	3.94	Pbx1	introns	No_boundary
chr17	39845116	39845126	11	+	1000	7.08455	3.74	4.06	Rn45s	exons	No_boundary
chr9	34653734	34653855	122	+	1000	7.07363	3.65	3.99	Kirrel3	introns	No_boundary
chr11	102200479	102200641	163	-	1000	7.06171	3.57	3.92	Hdac5	cds	Exon_intron_boundary
chr1	168365567	168365633	67	-	1000	7.05978	3.62	3.96	Pbx1	introns	No_boundary
chr9	45463462	45463589	128	+	1000	7.04138	3.63	3.97	Dscaml1	introns	No_boundary
chr12	109566905	109566943	39	+	1000	7.03815	3.58	3.93	Meg3	introns	No_boundary
chr1	168355003	168355055	53	-	1000	7.00282	3.64	3.98	Pbx1	introns	No_boundary
chr1	168390320	168390402	83	-	1000	6.99576	3.61	3.95	Pbx1	introns	No_boundary
chr5	27063942	27064086	145	+	1000	6.98966	3.58	3.93	Dpp6	introns	No_boundary
chr1	168333721	168333854	134	-	1000	6.93118	3.66	4	Pbx1	introns	No_boundary
chr17	39847992	39848003	12	+	1000	6.92289	3.69	4.02	Rn45s	exons	No_boundary
chr14	30301845	30301997	153	-	1000	6.89473	3.64	3.97	Cacna1d	introns	No_boundary
chr2	26911254	26911336	83	+	1000	6.87137	3.71	4.04	Rpl7a	introns	Exon_intron_boundary
chr1	168371161	168371279	119	-	1000	6.85415	3.7	4.03	Pbx1	introns	No_boundary
chr5	27049840	27049963	124	+	1000	6.76414	3.61	3.95	Dpp6	introns	No_boundary
chr1	168299663	168299800	138	-	1000	6.7349	3.61	3.96	Pbx1	introns	No_boundary
chr1	168413574	168413664	91	-	1000	6.71063	3.55	3.9	Pbx1	introns	No_boundary
chr3	121249801	121249882	82	-	1000	6.70266	3.64	3.97	Tlcd4	introns	No_boundary
chr12	109545950	109546098	149	+	1000	6.63676	3.52	3.88	Meg3	introns	Exon_intron_boundary
chr9	45464280	45464427	148	+	1000	6.62724	3.57	3.91	Dscaml1	introns	No_boundary
chr5	132470139	132470235	97	-	1000	6.62522	3.52	3.88	Auts2	introns	No_boundary
chr1	168408129	168408216	88	-	1000	6.59373	3.67	4	Pbx1	introns	No_boundary
chr1	168421354	168421492	139	-	1000	6.59164	3.57	3.92	Pbx1	introns	No_boundary
chr4	117155772	117155856	85	-	1000	6.55714	3.65	3.99	Rps8	introns	Exon_intron_boundary
chr19	8724884	8724941	58	+	1000	6.55162	3.66	4	Snhg1	introns	Exon_intron_boundary
chr1	168331385	168331450	66	-	1000	6.53663	3.51	3.87	Pbx1	introns	No_boundary
chr19	5843504	5843708	205	-	1000	6.51111	3.56	3.91	Neat1	exons	No_boundary
chr9	34496574	34496758	185	+	1000	6.50907	3.55	3.9	Kirrel3	introns	No_boundary
chr1	168422148	168422288	141	-	1000	6.50561	3.53	3.89	Pbx1	introns	No_boundary
chr11	69668927	69668999	73	-	1000	6.41384	3.67	4.01	Eif4a1	introns	Exon_intron_boundary
chr11	118771131	118771251	121	-	1000	6.3766	3.58	3.94	Rbfox3	introns	No_boundary
chr7	44334300	44334389	90	+	1000	6.3717	3.54	3.89	Shank1	introns	Exon_intron_boundary
chr1	168308519	168308592	74	-	1000	6.36905	3.56	3.91	Pbx1	introns	No_boundary
chr1	168390057	168390143	87	-	1000	6.33026	3.65	3.98	Pbx1	introns	No_boundary
chr9	34500502	34500641	140	+	1000	6.31706	3.62	3.96	Kirrel3	introns	No_boundary
chr9	34518909	34518999	91	+	1000	6.30358	3.53	3.89	Kirrel3	introns	No_boundary
chr1	168416405	168416500	96	-	1000	6.30256	3.6	3.95	Pbx1	introns	No_boundary
chr1	168372571	168372640	70	-	1000	6.26951	3.53	3.88	Pbx1	introns	No_boundary
chr1	168419090	168419164	75	-	1000	6.26225	3.59	3.94	Pbx1	introns	No_boundary
chr9	34499205	34499296	92	+	1000	6.2087	3.46	3.82	Kirrel3	introns	No_boundary
chr9	34533686	34533855	170	+	1000	6.20722	3.59	3.94	Kirrel3	introns	No_boundary
chr8	9643185	9643288	104	-	1000	6.20255	3.48	3.84	Nalf1	introns	No_boundary
chr1	168339126	168339250	125	-	1000	6.19293	3.61	3.95	Pbx1	introns	No_boundary
chr1	168359465	168359531	67	-	1000	6.19293	3.64	3.97	Pbx1	introns	No_boundary
chr12	88954980	88955092	113	+	1000	6.1245	3.6	3.95	Nrxn3	introns	No_boundary
chr1	161035871	161035909	39	+	1000	6.12364	3.64	3.97	Gas5	introns	Exon_intron_boundary
chr9	34510778	34510892	115	+	1000	6.12035	3.48	3.85	Kirrel3	introns	No_boundary
chr1	168359322	168359423	102	-	1000	6.09625	3.65	3.99	Pbx1	introns	No_boundary
chr1	168262326	168262401	76	-	1000	6.08804	3.51	3.87	Pbx1	introns	No_boundary
chr1	168390837	168390901	65	-	1000	6.04679	3.44	3.79	Pbx1	introns	No_boundary
chr9	34496099	34496200	102	+	1000	6.04107	3.45	3.81	Kirrel3	introns	No_boundary
chr1	168303635	168303700	66	-	1000	6.03746	3.51	3.87	Pbx1	introns	No_boundary
chr5	132471142	132471249	108	-	1000	6.0257	3.48	3.84	Auts2	introns	No_boundary
chr17	25382274	25382418	145	-	1000	6.0109	3.47	3.83	Cacna1h	introns	No_boundary
chr11	118582265	118582357	93	-	1000	6.00701	3.55	3.91	Rbfox3	introns	No_boundary
chr11	118596524	118596626	103	-	1000	6.00689	3.57	3.93	Rbfox3	introns	No_boundary
chr1	168307185	168307242	58	-	1000	6.0033	3.42	3.78	Pbx1	introns	No_boundary
chr15	74583851	74584001	151	+	1000	5.98176	3.57	3.92	Adgrb1	introns	Exon_intron_boundary
chr1	168401461	168401510	50	-	1000	5.9387	3.45	3.81	Pbx1	introns	No_boundary
chr8	9612132	9612245	114	-	1000	5.9387	3.47	3.82	Nalf1	introns	No_boundary
chr19	5798612	5798617	6	-	1000	5.93107	3.65	3.99	Malat1	exons	No_boundary
chr17	23817973	23818068	96	+	1000	5.93044	3.49	3.85	Srrm2	cds	No_boundary
chr5	131994304	131994367	64	-	1000	5.92922	3.43	3.79	Auts2	introns	No_boundary
chr3	138801020	138801146	127	+	1000	5.9024	3.55	3.9	Tspan5	introns	No_boundary
chr17	23822737	23822849	113	+	1000	5.88673	3.63	3.96	Srrm2	introns	Exon_intron_boundary
chr17	23823566	23823652	87	+	1000	5.88522	3.45	3.8	Srrm2	introns	Exon_intron_boundary
chr1	168390683	168390826	144	-	1000	5.87966	3.52	3.87	Pbx1	introns	No_boundary
chr3	105483596	105483751	156	+	1000	5.85633	3.42	3.77	Kcnd3	introns	No_boundary
chr4	155219912	155220047	136	-	1000	5.85633	3.53	3.89	Ski	introns	No_boundary
chr11	118895135	118895263	129	-	1000	5.85313	3.42	3.78	Rbfox3	introns	No_boundary
chr12	111790303	111790448	146	+	1000	5.84903	3.51	3.86	Klc1	introns	No_boundary
chr12	109565582	109565719	138	+	1000	5.82353	3.55	3.91	Meg3	introns	No_boundary
chr1	168356879	168357016	138	-	1000	5.80571	3.49	3.85	Pbx1	introns	No_boundary
chr1	168402193	168402345	153	-	1000	5.80305	3.39	3.76	Pbx1	introns	No_boundary
chr8	14603868	14604020	153	+	1000	5.75289	3.39	3.76	Dlgap2	introns	No_boundary
chr1	168355967	168356069	103	-	1000	5.75269	3.5	3.86	Pbx1	introns	No_boundary
chr11	5992667	5992735	69	-	1000	5.74461	3.44	3.8	Camk2b	introns	Intron_exon_boundary
chr7	49253995	49254090	96	+	1000	5.74461	3.47	3.84	Nav2	introns	No_boundary
chr8	9642952	9643069	118	-	1000	5.74053	3.44	3.8	Nalf1	introns	No_boundary
chr1	168355370	168355502	133	-	1000	5.7229	3.39	3.75	Pbx1	introns	No_boundary
chr1	15461710	15461875	166	+	1000	5.70945	3.57	3.92	Kcnb2	introns	No_boundary
chr19	5842694	5842777	84	-	1000	5.70863	3.48	3.84	Neat1	exons	No_boundary
chr2	25466847	25466940	94	-	1000	5.69799	3.53	3.89	Ptgds	introns	Exon_intron_boundary
chr9	34543991	34544087	97	+	1000	5.6924	3.49	3.85	Kirrel3	introns	No_boundary
chr9	34623541	34623626	86	+	1000	5.68854	3.41	3.77	Kirrel3	introns	No_boundary
chr1	168306032	168306200	169	-	1000	5.68795	3.56	3.91	Pbx1	introns	No_boundary
chr2	130278013	130278088	76	+	1000	5.68481	3.58	3.93	Nop56	introns	Exon_intron_boundary
chr1	168426125	168426205	81	-	1000	5.65302	3.52	3.88	Pbx1	introns	No_boundary
chr19	5838566	5838652	87	-	1000	5.6442	3.55	3.9	Neat1	exons	No_boundary
chr19	5839524	5839638	115	-	1000	5.6442	3.51	3.87	Neat1	exons	No_boundary
chr1	168351936	168351998	63	-	1000	5.6281	3.5	3.86	Pbx1	introns	No_boundary
chr1	168409566	168409631	66	-	1000	5.62578	3.47	3.83	Pbx1	introns	No_boundary
chr1	168364687	168364787	101	-	1000	5.60026	3.49	3.85	Pbx1	introns	No_boundary
chrX	57391446	57391526	81	-	1000	5.58469	3.57	3.92	Rbmx	introns	Exon_intron_boundary
chr11	118810352	118810449	98	-	1000	5.57182	3.43	3.79	Rbfox3	introns	No_boundary
chr19	5840809	5840960	152	-	1000	5.57182	3.53	3.89	Neat1	exons	No_boundary
chr8	95712490	95712563	74	+	1000	5.56954	3.44	3.79	Ndrg4	introns	Exon_intron_boundary
chr1	168334999	168335067	69	-	1000	5.55588	3.44	3.79	Pbx1	introns	No_boundary
chr1	168372087	168372207	121	-	1000	5.55588	3.44	3.8	Pbx1	introns	No_boundary
chr9	45543541	45543701	161	+	1000	5.55497	3.35	3.71	Dscaml1	introns	No_boundary
chr11	118763774	118763897	124	-	1000	5.54665	3.35	3.71	Rbfox3	introns	No_boundary
chr12	88959994	88960108	115	+	1000	5.54265	3.47	3.84	Nrxn3	introns	No_boundary
chr1	168308335	168308445	111	-	1000	5.53936	3.39	3.76	Pbx1	introns	No_boundary
chr1	168421747	168421819	73	-	1000	5.53404	3.55	3.9	Pbx1	introns	No_boundary
chr18	84074766	84074887	122	-	1000	5.50174	3.55	3.9	Tshz1	introns	No_boundary
chr1	168357129	168357180	52	-	1000	5.50044	3.49	3.85	Pbx1	introns	No_boundary
chr12	88980322	88980450	129	+	1000	5.46751	3.39	3.76	Nrxn3	introns	No_boundary
chr8	9730625	9730712	88	-	1000	5.46175	3.35	3.71	Nalf1	introns	No_boundary
chr1	168360190	168360228	39	-	1000	5.4551	3.37	3.74	Pbx1	introns	No_boundary
chr11	118587937	118588062	126	-	1000	5.43146	3.39	3.75	Rbfox3	introns	No_boundary
chr8	9437663	9437755	93	-	1000	5.42427	3.47	3.83	Nalf1	introns	No_boundary
chr8	14280562	14280703	142	+	1000	5.40797	3.48	3.84	Dlgap2	introns	No_boundary
chr1	168426709	168426796	88	-	1000	5.403	3.44	3.8	Pbx1	introns	No_boundary
chr17	70144916	70144992	77	+	1000	5.38683	3.43	3.79	Dlgap1	introns	No_boundary
chr9	45484898	45484990	93	+	1000	5.38541	3.33	3.69	Dscaml1	introns	No_boundary
chr4	3835082	3835117	36	-	1000	5.38482	3.46	3.81	Rps20	introns	Exon_intron_boundary
chr11	5972057	5972171	115	-	1000	5.38273	3.53	3.88	Camk2b	introns	Exon_intron_boundary
chr1	168420541	168420606	66	-	1000	5.36936	3.47	3.82	Pbx1	introns	No_boundary
chr12	109566782	109566904	123	+	1000	5.3275	3.45	3.81	Meg3	introns	No_boundary
chr19	5830450	5830551	102	-	1000	5.32491	3.51	3.86	Neat1	exons	No_boundary
chr1	168324056	168324178	123	-	1000	5.31963	3.53	3.88	Pbx1	introns	No_boundary
chr8	9596130	9596271	142	-	1000	5.30862	3.35	3.7	Nalf1	introns	No_boundary
chr9	45469529	45469680	152	+	1000	5.30862	3.44	3.8	Dscaml1	introns	No_boundary
chr14	11575795	11575913	119	+	1000	5.26769	3.44	3.8	Ptprg	introns	No_boundary
chr1	168357385	168357469	85	-	1000	5.26587	3.43	3.78	Pbx1	introns	No_boundary
chr11	101604964	101605036	73	+	1000	5.26125	3.47	3.83	NA	exons	Exon_intron_boundary
chr17	23818322	23818381	60	+	1000	5.25575	3.45	3.81	Srrm2	cds	No_boundary
chr1	168416563	168416632	70	-	1000	5.25547	3.44	3.79	Pbx1	introns	No_boundary
chr2	77699540	77699654	115	-	1000	5.23719	3.37	3.73	Zfp385b	introns	No_boundary
chr1	168306622	168306766	145	-	1000	5.23473	3.49	3.85	Pbx1	introns	No_boundary
chr1	168425465	168425535	71	-	1000	5.23117	3.47	3.83	Pbx1	introns	No_boundary
chr7	49248635	49248783	149	+	1000	5.21497	3.46	3.82	Nav2	introns	No_boundary
chr11	118792319	118792408	90	-	1000	5.20935	3.37	3.73	Rbfox3	introns	No_boundary
chr1	168346986	168347069	84	-	1000	5.2086	3.5	3.86	Pbx1	introns	No_boundary
chr11	118810811	118810914	104	-	1000	5.2025	3.29	3.65	Rbfox3	introns	No_boundary
chr5	27025926	27026002	77	+	1000	5.1959	3.31	3.67	Dpp6	introns	No_boundary
chr1	168310749	168310811	63	-	1000	5.19336	3.51	3.87	Pbx1	introns	No_boundary
chr8	14282103	14282203	101	+	1000	5.19336	3.39	3.75	Dlgap2	introns	No_boundary
chr2	26588352	26588564	213	+	1000	5.19282	3.41	3.77	Egfl7	5UTRs	Exon_intron_boundary
chr11	108312618	108312706	89	-	1000	5.17809	3.29	3.65	Prkca	introns	No_boundary
chr8	95711441	95711560	120	+	1000	5.17804	3.37	3.73	Ndrg4	introns	Exon_intron_boundary
chr9	34761078	34761177	100	+	1000	5.16371	3.27	3.63	Kirrel3	introns	No_boundary
chr1	168417899	168417947	49	-	1000	5.1481	3.46	3.82	Pbx1	introns	No_boundary
chr3	34217332	34217440	109	+	1000	5.1481	3.42	3.78	Sox2ot	introns	No_boundary
chr1	168306941	168307013	73	-	1000	5.14254	3.47	3.82	Pbx1	introns	No_boundary
chr2	25295147	25295281	135	-	1000	5.13336	3.45	3.81	Grin1	introns	No_boundary
chr7	49267017	49267160	144	+	1000	5.13336	3.47	3.83	Nav2	introns	No_boundary
chr1	168358592	168358769	178	-	1000	5.12281	3.36	3.72	Pbx1	introns	No_boundary
chr1	168394742	168394805	64	-	1000	5.09987	3.27	3.62	Pbx1	introns	No_boundary
chr9	45460335	45460448	114	+	1000	5.08807	3.34	3.7	Dscaml1	introns	No_boundary
chr5	27263094	27263217	124	+	1000	5.06879	3.31	3.67	Dpp6	introns	No_boundary
chr1	168401054	168401182	129	-	1000	5.06638	3.46	3.82	Pbx1	introns	No_boundary
chr18	25641360	25641443	84	-	1000	5.06631	3.31	3.67	Celf4	introns	No_boundary
chr1	168310905	168311006	102	-	1000	5.06508	3.33	3.69	Pbx1	introns	No_boundary
chr5	132392352	132392511	160	-	1000	5.06197	3.39	3.75	Auts2	introns	No_boundary
chr15	74560640	74560792	153	+	1000	5.05959	3.5	3.86	Adgrb1	introns	No_boundary
chr11	118808037	118808208	172	-	1000	5.05211	3.4	3.76	Rbfox3	introns	No_boundary
chr1	168360027	168360133	107	-	1000	5.05095	3.42	3.78	Pbx1	introns	No_boundary
chr5	132186492	132186578	87	-	1000	5.04945	3.32	3.68	Auts2	introns	No_boundary
chr11	118768653	118768857	205	-	1000	5.04391	3.3	3.66	Rbfox3	introns	No_boundary
chr3	153662624	153662733	110	-	1000	5.04391	3.42	3.77	St6galnac3	introns	No_boundary
chr9	56223647	56223668	22	-	1000	5.04315	3.29	3.64	Peak1	introns	No_boundary
chr4	125495553	125495699	147	+	1000	5.03834	3.28	3.64	Grik3	introns	No_boundary
chr11	108295263	108295365	103	-	1000	5.03289	3.3	3.65	Prkca	introns	No_boundary
chr18	25608838	25608973	136	-	1000	5.02923	3.25	3.6	Celf4	introns	No_boundary
chr7	49251916	49251980	65	+	1000	5.02522	3.27	3.63	Nav2	introns	No_boundary
chr1	168421848	168421961	114	-	1000	5.02412	3.32	3.69	Pbx1	introns	No_boundary
chr13	8389465	8389600	136	+	1000	5.02115	3.25	3.61	Adarb2	introns	No_boundary
chr18	25641924	25642063	140	-	1000	5.02115	3.36	3.72	Celf4	introns	No_boundary
chr17	86177609	86177685	77	+	1000	5.01414	3.26	3.62	Prkce	introns	No_boundary
chr17	86248938	86249010	73	+	1000	5.01414	3.31	3.67	Prkce	introns	No_boundary
chr1	168363464	168363541	78	-	1000	5.01249	3.25	3.61	Pbx1	introns	No_boundary
chr11	5989675	5989846	172	-	1000	5.01106	3.43	3.78	Camk2b	introns	Exon_intron_boundary
chr5	131716790	131716881	92	-	1000	5.0078	3.3	3.66	Auts2	introns	No_boundary
chr11	118900862	118900932	71	-	1000	4.99093	3.25	3.61	Rbfox3	introns	No_boundary
chr3	153673347	153673437	91	-	1000	4.99093	3.26	3.61	St6galnac3	introns	No_boundary
chr11	87448785	87448858	74	+	1000	4.98938	3.23	3.59	Tex14	introns	No_boundary
chr2	173263734	173263835	102	-	1000	4.98938	3.37	3.73	Pmepa1	introns	No_boundary
chr9	34625945	34626059	115	+	1000	4.97179	3.35	3.7	Kirrel3	introns	No_boundary
chr5	27154286	27154431	146	+	1000	4.96718	3.37	3.73	Dpp6	introns	No_boundary
chr5	132502255	132502423	169	-	1000	4.96718	3.31	3.67	Auts2	introns	No_boundary
chr12	109566614	109566699	86	+	1000	4.96638	3.4	3.77	Meg3	introns	No_boundary
chr1	168334754	168334800	47	-	1000	4.95546	3.36	3.72	Pbx1	introns	No_boundary
chr18	25647491	25647585	95	-	1000	4.95546	3.37	3.74	Celf4	introns	No_boundary
chr9	45508885	45509027	143	+	1000	4.95148	3.36	3.72	Dscaml1	introns	No_boundary
chr1	168364486	168364560	75	-	1000	4.94416	3.3	3.65	Pbx1	introns	No_boundary
chr1	168337798	168337895	98	-	1000	4.93196	3.38	3.74	Pbx1	introns	No_boundary
chr1	168384551	168384621	71	-	1000	4.90591	3.36	3.72	Pbx1	introns	No_boundary
chr11	6012899	6012973	75	-	1000	4.90556	3.33	3.69	Camk2b	introns	No_boundary
chr7	68019415	68019532	118	+	1000	4.88827	3.27	3.63	Igf1r	introns	No_boundary
chr9	68797640	68797853	214	+	1000	4.86464	3.39	3.76	Rora	introns	No_boundary
chr9	34630709	34630839	131	+	1000	4.85821	3.26	3.62	Kirrel3	introns	No_boundary
chr4	155213828	155213934	107	-	1000	4.8558	3.32	3.68	Ski	introns	No_boundary
chr1	168297399	168297523	125	-	1000	4.85372	3.47	3.83	Pbx1	introns	No_boundary
chr9	34555396	34555480	85	+	1000	4.85109	3.22	3.58	Kirrel3	introns	No_boundary
chr4	125530336	125530493	158	+	1000	4.83056	3.31	3.67	Grik3	introns	No_boundary
chr9	68737022	68737103	82	+	1000	4.83056	3.2	3.57	Rora	introns	No_boundary
chr2	25292523	25292655	133	-	1000	4.82362	3.38	3.75	Grin1	introns	Intron_exon_boundary
chr1	168424261	168424320	60	-	1000	4.82281	3.38	3.74	Pbx1	introns	No_boundary
chr2	179448313	179448447	135	+	1000	4.82154	3.23	3.59	Cdh4	introns	No_boundary
chr11	118576921	118577070	150	-	1000	4.81062	3.36	3.72	Rbfox3	introns	No_boundary
chr3	138745992	138746059	68	+	1000	4.80682	3.36	3.72	Tspan5	introns	No_boundary
chr5	132246361	132246480	120	-	1000	4.80607	3.34	3.69	Auts2	introns	No_boundary
chr9	45466414	45466542	129	+	1000	4.80607	3.4	3.76	Dscaml1	introns	No_boundary
chr11	77467177	77467266	90	+	1000	4.80363	3.25	3.6	Coro6	cds	Exon_intron_boundary
chr9	45530924	45531055	132	+	1000	4.80088	3.3	3.65	Dscaml1	introns	No_boundary
chr1	168328628	168328695	68	-	1000	4.7958	3.38	3.75	Pbx1	introns	No_boundary
chr9	68733568	68733642	75	+	1000	4.77252	3.19	3.55	Rora	introns	No_boundary
chr18	25677658	25677747	90	-	1000	4.75468	3.21	3.57	Celf4	introns	No_boundary
chr17	27480691	27480783	93	-	1000	4.75415	3.28	3.64	Grm4	introns	No_boundary
chr1	168289899	168289980	82	-	1000	4.74427	3.29	3.64	Pbx1	introns	No_boundary
chr15	74547415	74547481	67	+	1000	4.73641	3.2	3.56	Adgrb1	introns	Exon_intron_boundary
chr12	88916800	88916937	138	+	1000	4.73497	3.4	3.76	Nrxn3	introns	No_boundary
chr8	9506094	9506190	97	-	1000	4.73266	3.41	3.77	Nalf1	introns	No_boundary
chr17	39847989	39847991	3	+	1000	4.72022	3.43	3.79	Rn45s	exons	No_boundary
chr9	29406839	29407038	200	-	1000	4.71092	3.17	3.54	Ntm	introns	No_boundary
chr2	77628010	77628207	198	-	1000	4.70342	3.25	3.61	Zfp385b	introns	No_boundary
chr11	5979360	5979429	70	-	1000	4.70158	3.34	3.7	Camk2b	introns	Exon_intron_boundary
chr1	168422650	168422715	66	-	1000	4.69964	3.32	3.69	Pbx1	introns	No_boundary
chr1	168300075	168300138	64	-	1000	4.69927	3.19	3.55	Pbx1	introns	No_boundary
chr1	168307337	168307451	115	-	1000	4.69914	3.4	3.77	Pbx1	introns	No_boundary
chr1	168415490	168415562	73	-	1000	4.69784	3.37	3.73	Pbx1	introns	No_boundary
chr5	132396479	132396576	98	-	1000	4.69678	3.34	3.7	Auts2	introns	No_boundary
chr1	168341794	168341938	145	-	1000	4.69403	3.21	3.58	Pbx1	introns	No_boundary
chr9	34579815	34579898	84	+	1000	4.68437	3.35	3.71	Kirrel3	introns	No_boundary
chr17	70118309	70118401	93	+	1000	4.682	3.23	3.59	Dlgap1	introns	No_boundary
chr5	27124418	27124565	148	+	1000	4.65772	3.35	3.7	Dpp6	introns	No_boundary
chr11	118894277	118894436	160	-	1000	4.65425	3.32	3.68	Rbfox3	introns	No_boundary
chr18	25643359	25643471	113	-	1000	4.64991	3.18	3.55	Celf4	introns	No_boundary
chr8	9618627	9618824	198	-	1000	4.64599	3.38	3.74	Nalf1	introns	No_boundary
chr9	34607142	34607276	135	+	1000	4.64599	3.3	3.65	Kirrel3	introns	No_boundary
chr11	118668608	118668709	102	-	1000	4.64047	3.19	3.55	Rbfox3	introns	No_boundary
chr9	34566771	34566891	121	+	1000	4.63287	3.3	3.66	Kirrel3	introns	No_boundary
chr11	108187434	108187549	116	-	1000	4.62372	3.3	3.66	Prkca	introns	No_boundary
chr4	125512505	125512622	118	+	1000	4.61905	3.14	3.5	Grik3	introns	No_boundary
chr7	79510120	79510219	100	+	1000	4.60286	3.22	3.58	Mir9-3hg	introns	No_boundary
chr9	34495599	34495742	144	+	1000	4.60286	3.27	3.63	Kirrel3	introns	Exon_intron_boundary
chr1	168354109	168354193	85	-	1000	4.60152	3.22	3.59	Pbx1	introns	No_boundary
chr1	168381014	168381079	66	-	1000	4.59674	3.21	3.58	Pbx1	introns	No_boundary
chr1	168420252	168420298	47	-	1000	4.59383	3.38	3.74	Pbx1	introns	No_boundary
chr8	9716512	9716596	85	-	1000	4.59252	3.2	3.56	Nalf1	introns	No_boundary
chr9	68710837	68710946	110	+	1000	4.59252	3.28	3.64	Rora	introns	No_boundary
chr17	39847986	39847988	3	+	1000	4.59037	3.42	3.78	Rn45s	exons	No_boundary
chr12	88997070	88997167	98	+	1000	4.57597	3.15	3.51	Nrxn3	introns	No_boundary
chr1	15327399	15327489	91	+	1000	4.5744	3.19	3.56	Kcnb2	introns	No_boundary
chr1	168338704	168338876	173	-	1000	4.57399	3.3	3.66	Pbx1	introns	No_boundary
chr11	118782628	118782758	131	-	1000	4.56084	3.3	3.66	Rbfox3	introns	No_boundary
chr5	26942904	26942995	92	+	1000	4.56084	3.16	3.52	Dpp6	introns	No_boundary
chr17	8818946	8819054	109	+	1000	4.55667	3.24	3.6	Pde10a	introns	No_boundary
chr1	168371963	168372042	80	-	1000	4.55191	3.26	3.62	Pbx1	introns	No_boundary
chr18	25671080	25671172	93	-	1000	4.54324	3.35	3.71	Celf4	introns	No_boundary
chr9	45457052	45457122	71	+	1000	4.53432	3.3	3.66	Dscaml1	introns	No_boundary
chr1	168357612	168357679	68	-	1000	4.53258	3.17	3.54	Pbx1	introns	No_boundary
chr1	168409684	168409783	100	-	1000	4.52767	3.22	3.59	Pbx1	introns	No_boundary
chr7	44334099	44334246	148	+	1000	4.5273	3.31	3.67	Shank1	introns	Exon_intron_boundary
chr1	168375371	168375479	109	-	1000	4.52271	3.37	3.73	Pbx1	introns	No_boundary
chr3	153662847	153662951	105	-	1000	4.52	3.15	3.51	St6galnac3	introns	No_boundary
chr8	120357695	120357784	90	+	1000	4.51092	3.2	3.57	Gse1	introns	No_boundary
chr5	131927121	131927215	95	-	1000	4.5085	3.27	3.63	Auts2	introns	No_boundary
chr2	6956636	6956717	82	-	1000	4.50732	3.15	3.5	Celf2	introns	No_boundary
chr5	36370947	36371051	105	-	1000	4.50732	3.26	3.62	Sorcs2	introns	No_boundary
chr2	37400068	37400123	56	-	1000	4.49764	3.35	3.71	Rc3h2	introns	Exon_intron_boundary
chr5	132248226	132248309	84	-	1000	4.49764	3.13	3.49	Auts2	introns	No_boundary
chr3	109863822	109863875	54	+	1000	4.49228	3.18	3.54	NA	exons	Exon_intron_boundary
chr8	117267824	117267973	150	+	1000	4.49169	3.38	3.74	Cmip	introns	No_boundary
chr1	168409495	168409563	69	-	1000	4.48971	3.31	3.67	Pbx1	introns	No_boundary
chr1	168418675	168418730	56	-	1000	4.48971	3.26	3.61	Pbx1	introns	No_boundary
chr11	118809366	118809496	131	-	1000	4.47167	3.38	3.75	Rbfox3	introns	No_boundary
chr1	168354817	168354908	92	-	1000	4.46933	3.35	3.7	Pbx1	introns	No_boundary
chr9	34629827	34629933	107	+	1000	4.45374	3.24	3.6	Kirrel3	introns	No_boundary
chr3	138787856	138787927	72	+	1000	4.45264	3.18	3.54	Tspan5	introns	No_boundary
chr9	68660075	68660231	157	+	1000	4.45165	3.19	3.56	Rora	introns	No_boundary
chr11	118897784	118897862	79	-	1000	4.45032	3.13	3.48	Rbfox3	introns	No_boundary
chr11	118752421	118752497	77	-	1000	4.44899	3.27	3.62	Rbfox3	introns	No_boundary
chr12	88984877	88984920	44	+	1000	4.44899	3.27	3.63	Nrxn3	introns	No_boundary
chr5	132471289	132471375	87	-	1000	4.44661	3.24	3.6	Auts2	introns	No_boundary
chr18	25677032	25677119	88	-	1000	4.44449	3.11	3.45	Celf4	introns	No_boundary
chr9	68796854	68796948	95	+	1000	4.44449	3.21	3.57	Rora	introns	No_boundary
chr1	168329017	168329094	78	-	1000	4.444	3.21	3.58	Pbx1	introns	No_boundary
chr11	118779778	118779873	96	-	1000	4.44248	3.18	3.55	Rbfox3	introns	No_boundary
chr11	33825419	33825531	113	-	1000	4.43447	3.3	3.65	Kcnip1	introns	No_boundary
chr2	179497901	179498042	142	+	1000	4.43447	3.18	3.55	Cdh4	introns	No_boundary
chr5	36333390	36333568	179	-	1000	4.43447	3.12	3.47	Sorcs2	introns	No_boundary
chr8	14351541	14351622	82	+	1000	4.43219	3.13	3.49	Dlgap2	introns	No_boundary
chr8	120509006	120509135	130	+	1000	4.42518	3.24	3.6	Gse1	introns	No_boundary
chr11	118603319	118603421	103	-	1000	4.42382	3.32	3.68	Rbfox3	introns	No_boundary
chr1	168268836	168268894	59	-	1000	4.42061	3.17	3.53	Pbx1	introns	No_boundary
chr5	131721411	131721543	133	-	1000	4.41442	3.29	3.65	Auts2	introns	No_boundary
chr5	131769315	131769404	90	-	1000	4.41442	3.19	3.55	Auts2	introns	No_boundary
chr2	179478926	179479027	102	+	1000	4.407	3.08	3.44	Cdh4	introns	No_boundary
chr18	84071969	84072163	195	-	1000	4.40249	3.28	3.64	Tshz1	introns	No_boundary
chr1	168310116	168310162	47	-	1000	4.3992	3.13	3.49	Pbx1	introns	No_boundary
chr2	25469139	25469218	80	-	1000	4.3992	3.35	3.7	Ptgds	introns	Exon_intron_boundary
chr8	9609885	9609992	108	-	1000	4.39766	3.12	3.47	Nalf1	introns	No_boundary
chr9	45453651	45453771	121	+	1000	4.39539	3.34	3.69	Dscaml1	introns	No_boundary
chr11	118793713	118793817	105	-	1000	4.39462	3.17	3.53	Rbfox3	introns	No_boundary
chr11	77468186	77468306	121	+	1000	4.39016	3.2	3.57	Coro6	cds	Exon_intron_boundary
chr9	34695455	34695546	92	+	1000	4.38582	3.19	3.55	Kirrel3	introns	No_boundary
chr14	30341602	30341667	66	-	1000	4.38061	3.19	3.55	Cacna1d	introns	No_boundary
chr17	27489693	27489859	167	-	1000	4.37592	3.17	3.54	Grm4	introns	No_boundary
chr1	168372677	168372765	89	-	1000	4.36705	3.27	3.63	Pbx1	introns	No_boundary
chr7	49252330	49252400	71	+	1000	4.35848	3.08	3.43	Nav2	introns	No_boundary
chr5	132535106	132535203	98	-	1000	4.35558	3.16	3.52	Auts2	introns	No_boundary
chr5	132027191	132027288	98	-	1000	4.35161	3.08	3.43	Auts2	introns	No_boundary
chr12	89580154	89580213	60	+	1000	4.34842	3.13	3.48	Nrxn3	introns	No_boundary
chr9	45536346	45536473	128	+	1000	4.34828	3.23	3.6	Dscaml1	introns	No_boundary
chr9	29405783	29405878	96	-	1000	4.34777	3.07	3.41	Ntm	introns	No_boundary
chr11	88662650	88662756	107	-	1000	4.34637	3.14	3.5	Msi2	introns	No_boundary
chr1	168386151	168386229	79	-	1000	4.3457	3.16	3.52	Pbx1	introns	No_boundary
chr18	79070550	79070667	118	-	1000	4.3441	3.1	3.45	Setbp1	introns	No_boundary
chr1	168422408	168422474	67	-	1000	4.33365	3.36	3.72	Pbx1	introns	No_boundary
chr1	168408276	168408347	72	-	1000	4.32436	3.31	3.67	Pbx1	introns	No_boundary
chr17	39847646	39847649	4	+	1000	4.30923	3.57	3.92	Rn45s	exons	No_boundary
chr18	25643119	25643291	173	-	1000	4.30484	3.11	3.46	Celf4	introns	No_boundary
chr1	168312621	168312685	65	-	1000	4.30366	3.09	3.44	Pbx1	introns	No_boundary
chr1	168391334	168391390	57	-	1000	4.30261	3.35	3.71	Pbx1	introns	No_boundary
chr1	168410103	168410190	88	-	1000	4.29871	3.35	3.71	Pbx1	introns	No_boundary
chr17	23817240	23817340	101	+	1000	4.29492	3.14	3.5	Srrm2	cds	No_boundary
chr1	168348952	168348995	44	-	1000	4.29436	3.19	3.56	Pbx1	introns	No_boundary
chr8	9660010	9660071	62	-	1000	4.29382	3.26	3.62	Nalf1	introns	No_boundary
chr1	15457062	15457192	131	+	1000	4.29096	3.08	3.43	Kcnb2	introns	No_boundary
chr5	132460074	132460168	95	-	1000	4.28815	3.12	3.47	Auts2	introns	No_boundary
chr3	138777544	138777630	87	+	1000	4.28704	3.07	3.42	Tspan5	introns	No_boundary
chr1	168377875	168377952	78	-	1000	4.28006	3.26	3.61	Pbx1	introns	No_boundary
chr1	168412951	168413018	68	-	1000	4.28006	3.33	3.69	Pbx1	introns	No_boundary
chr1	168276733	168276791	59	-	1000	4.26631	3.14	3.49	Pbx1	introns	No_boundary
chr9	68763442	68763571	130	+	1000	4.26348	3.13	3.48	Rora	introns	No_boundary
chr1	168355681	168355890	210	-	1000	4.26201	3.16	3.53	Pbx1	introns	No_boundary
chr4	125510031	125510104	74	+	1000	4.25089	3.08	3.43	Grik3	introns	No_boundary
chr8	120358095	120358194	100	+	1000	4.25089	3.11	3.46	Gse1	introns	No_boundary
chr11	108188902	108189039	138	-	1000	4.24978	3.19	3.56	Prkca	introns	No_boundary
chr11	118594723	118594857	135	-	1000	4.24978	3.23	3.59	Rbfox3	introns	No_boundary
chr5	36325055	36325130	76	-	1000	4.24971	3.14	3.49	Sorcs2	introns	No_boundary
chr8	14382790	14382910	121	+	1000	4.24527	3.21	3.58	Dlgap2	introns	No_boundary
chr9	34705315	34705435	121	+	1000	4.24527	3.12	3.48	Kirrel3	introns	No_boundary
chr1	15529513	15529618	106	+	1000	4.24191	3.3	3.66	Kcnb2	introns	No_boundary
chr7	49264067	49264128	62	+	1000	4.2384	3.13	3.49	Nav2	introns	No_boundary
chr12	88871762	88871865	104	+	1000	4.23466	3.16	3.52	Nrxn3	introns	No_boundary
chr9	122595885	122595979	95	+	1000	4.23359	3.23	3.59	9530059O14Rik	introns	No_boundary
chr4	155215588	155215693	106	-	1000	4.2321	3.21	3.58	Ski	introns	No_boundary
chr11	6001647	6001750	104	-	1000	4.23079	3.29	3.64	Camk2b	introns	Exon_intron_boundary
chr11	108299832	108299955	124	-	1000	4.23079	3.09	3.44	Prkca	introns	No_boundary
chr11	118598406	118598511	106	-	1000	4.2252	3.27	3.63	Rbfox3	introns	No_boundary
chr19	5844137	5844225	89	-	1000	4.22128	3.27	3.63	Neat1	exons	No_boundary
chr12	109568106	109568175	70	+	1000	4.22026	3.3	3.65	Meg3	introns	No_boundary
chr10	13967429	13967540	112	+	1000	4.21921	3.3	3.66	Hivep2	introns	No_boundary
chr1	168318654	168318769	116	-	1000	4.21548	3.29	3.64	Pbx1	introns	No_boundary
chr1	168326710	168326919	210	-	1000	4.20829	3.32	3.68	Pbx1	introns	No_boundary
chr1	168360283	168360343	61	-	1000	4.20829	3.26	3.62	Pbx1	introns	No_boundary
chr12	88881944	88882036	93	+	1000	4.20825	3.07	3.42	Nrxn3	introns	No_boundary
chr11	100348543	100348634	92	-	1000	4.20374	3.05	3.39	Hap1	3UTRs	No_boundary
chr1	168365187	168365272	86	-	1000	4.20301	3.21	3.57	Pbx1	introns	No_boundary
chr2	77694354	77694396	43	-	1000	4.19931	3.06	3.39	Zfp385b	introns	No_boundary
chr9	34551282	34551420	139	+	1000	4.19928	3.11	3.46	Kirrel3	introns	No_boundary
chr1	168314816	168314889	74	-	1000	4.19622	3.09	3.44	Pbx1	introns	No_boundary
chr8	47364190	47364309	120	-	1000	4.18979	3.07	3.41	Stox2	introns	No_boundary
chr5	27089795	27089897	103	+	1000	4.18851	3.06	3.4	Dpp6	introns	No_boundary
chr11	118798364	118798543	180	-	1000	4.17998	3.12	3.47	Rbfox3	introns	No_boundary
chr3	34213577	34213690	114	+	1000	4.1776	3.24	3.6	Sox2ot	introns	No_boundary
chr5	27170234	27170325	92	+	1000	4.17504	3.14	3.5	Dpp6	introns	No_boundary
chr8	120525089	120525250	162	+	1000	4.17504	3.16	3.52	Gse1	introns	No_boundary
chr7	49262850	49262889	40	+	1000	4.17482	3.21	3.58	Nav2	introns	No_boundary
chr2	77687605	77687714	110	-	1000	4.17087	3.04	3.38	Zfp385b	introns	No_boundary
chr5	131735507	131735635	129	-	1000	4.17087	3.13	3.48	Auts2	introns	No_boundary
chr9	34754326	34754505	180	+	1000	4.15614	3.1	3.45	Kirrel3	introns	No_boundary
chr1	168421113	168421150	38	-	1000	4.15483	3.04	3.38	Pbx1	introns	No_boundary
chr9	34504993	34505083	91	+	1000	4.15483	3.32	3.68	Kirrel3	introns	No_boundary
chr12	88914799	88914969	171	+	1000	4.15139	3.24	3.6	Nrxn3	introns	No_boundary
chr6	47788114	47788131	18	-	1000	4.14194	3.37	3.74	NA	exons	Intron_exon_boundary
chr9	112172377	112172474	98	-	1000	4.14095	3.14	3.5	Arpp21	introns	No_boundary
chr1	168268515	168268603	89	-	1000	4.13864	3.1	3.45	Pbx1	introns	No_boundary
chr1	168370311	168370381	71	-	1000	4.13851	3.32	3.68	Pbx1	introns	No_boundary
chr9	45480361	45480472	112	+	1000	4.13851	3.04	3.38	Dscaml1	introns	No_boundary
chr8	9744819	9744936	118	-	1000	4.13528	3.19	3.56	Nalf1	introns	No_boundary
chr15	74565252	74565372	121	+	1000	4.12671	3.01	3.35	Adgrb1	introns	No_boundary
chr1	168324985	168325031	47	-	1000	4.12543	3.2	3.56	Pbx1	introns	No_boundary
chr5	132386360	132386487	128	-	1000	4.11776	3.08	3.43	Auts2	introns	No_boundary
chr7	68063889	68063984	96	+	1000	4.11711	3.09	3.44	Igf1r	introns	No_boundary
chr4	155220136	155220224	89	-	1000	4.11099	3.13	3.48	Ski	introns	No_boundary
chr9	34529864	34529938	75	+	1000	4.09643	3.12	3.47	Kirrel3	introns	No_boundary
chr1	168398138	168398222	85	-	1000	4.09448	3.11	3.46	Pbx1	introns	No_boundary
chr17	13590575	13590668	94	-	1000	4.0932	3.26	3.61	2700054A10Rik	introns	No_boundary
chr5	131763853	131763944	92	-	1000	4.0932	3.15	3.51	Auts2	introns	No_boundary
chr4	125498478	125498568	91	+	1000	4.09022	3.16	3.52	Grik3	introns	No_boundary
chr7	68053521	68053656	136	+	1000	4.07855	3.07	3.41	Igf1r	introns	No_boundary
chr17	56428428	56428581	154	-	1000	4.0745	3.01	3.35	Ptprs	introns	No_boundary
chr9	34501391	34501495	105	+	1000	4.07389	3.2	3.56	Kirrel3	introns	No_boundary
chr1	168369628	168369695	68	-	1000	4.07144	3.11	3.46	Pbx1	introns	No_boundary
chr11	118865321	118865395	75	-	1000	4.05538	3.02	3.36	Rbfox3	introns	No_boundary
chr19	5839153	5839236	84	-	1000	4.05538	3.26	3.61	Neat1	exons	No_boundary
chr3	138774031	138774105	75	+	1000	4.05261	3.03	3.37	Tspan5	introns	No_boundary
chr5	36348837	36348955	119	-	1000	4.05261	3.04	3.37	Sorcs2	introns	No_boundary
chr8	117285222	117285296	75	+	1000	4.05261	3.07	3.42	Cmip	introns	No_boundary
chr1	168419413	168419515	103	-	1000	4.04758	3.33	3.69	Pbx1	introns	No_boundary
chr11	69668851	69668926	76	-	1000	4.0465	3.35	3.71	Eif4a1	introns	Exon_intron_boundary
chr2	179515269	179515382	114	+	1000	4.04512	3.09	3.44	Cdh4	introns	No_boundary
chr8	120508761	120508845	85	+	1000	4.04512	3.05	3.38	Gse1	introns	No_boundary
chr5	132249202	132249292	91	-	1000	4.04376	3.12	3.48	Auts2	introns	No_boundary
chr9	34505250	34505374	125	+	1000	4.04327	3.25	3.61	Kirrel3	introns	No_boundary
chr9	45495389	45495481	93	+	1000	4.04327	3.17	3.53	Dscaml1	introns	No_boundary
chr5	131761431	131761504	74	-	1000	4.03041	3.16	3.51	Auts2	introns	No_boundary
chr15	74553404	74553471	68	+	1000	4.0247	3.03	3.36	Adgrb1	introns	No_boundary
chr19	6343595	6343733	139	+	1000	4.0247	3.04	3.37	Map4k2	introns	Exon_intron_boundary
chr9	45501791	45501954	164	+	1000	4.0247	3.23	3.59	Dscaml1	introns	No_boundary
chr13	23581857	23581964	108	+	1000	4.02248	3.16	3.52	H4c4	cds	No_boundary
chr9	45453986	45454071	86	+	1000	4.02248	3.2	3.57	Dscaml1	introns	No_boundary
chr18	25664193	25664334	142	-	1000	4.01543	3.03	3.36	Celf4	introns	No_boundary
chr3	138762899	138763029	131	+	1000	4.01461	3.14	3.5	Tspan5	introns	No_boundary
chr5	36908567	36908743	177	+	1000	4.01461	3.14	3.5	Ppp2r2c	introns	No_boundary
chr11	118714799	118714899	101	-	1000	4.01357	3.26	3.62	Rbfox3	introns	No_boundary
chr11	118739767	118739918	152	-	1000	4.01357	3.1	3.45	Rbfox3	introns	No_boundary
chr4	125509574	125509679	106	+	1000	4.01357	3.13	3.48	Grik3	introns	No_boundary
chr9	45515612	45515653	42	+	1000	4.01357	3.19	3.56	Dscaml1	introns	No_boundary
chr7	49275383	49275476	94	+	1000	4.01243	3.04	3.38	Nav2	introns	No_boundary
chr1	168426313	168426346	34	-	1000	4.01113	3.22	3.58	Pbx1	introns	No_boundary
chr7	45126352	45126422	71	-	1000	4.01113	3.32	3.68	Rpl13a	introns	Exon_intron_boundary
chr17	39845550	39845573	24	+	1000	4.0106	3.27	3.62	Rn45s	exons	No_boundary
chr11	118754879	118754967	89	-	1000	4.00931	3	3.34	Rbfox3	introns	No_boundary
chr7	49258913	49258995	83	+	1000	4.00834	3.07	3.41	Nav2	introns	No_boundary
chr9	34585777	34585848	72	+	1000	4.00695	3.02	3.35	Kirrel3	introns	No_boundary
chr5	132117622	132117690	69	-	1000	4.00482	3	3.33	Auts2	introns	No_boundary
chr3	34236282	34236444	163	+	1000	3.99918	3.23	3.59	Sox2ot	introns	No_boundary
chr8	120365961	120366055	95	+	1000	3.9932	3.14	3.5	Gse1	introns	No_boundary
chr9	45460901	45461023	123	+	1000	3.99063	3.09	3.44	Dscaml1	introns	No_boundary
chr10	13982838	13982922	85	+	1000	3.9872	3.05	3.39	Hivep2	introns	No_boundary
chr12	88913090	88913173	84	+	1000	3.9851	3.05	3.39	Nrxn3	introns	No_boundary
chr5	27113040	27113128	89	+	1000	3.9851	3.01	3.35	Dpp6	introns	No_boundary
chr7	49253618	49253757	140	+	1000	3.9851	3.06	3.4	Nav2	introns	No_boundary
chr5	26821189	26821305	117	+	1000	3.98126	3.16	3.52	Dpp6	introns	No_boundary
chr5	132432488	132432556	69	-	1000	3.9765	3.02	3.36	Auts2	introns	No_boundary
chr17	70158170	70158285	116	+	1000	3.97531	3.01	3.35	Dlgap1	introns	No_boundary
chr18	25674454	25674591	138	-	1000	3.96289	3.06	3.39	Celf4	introns	No_boundary
chr11	88588281	88588418	138	-	1000	3.95786	3.08	3.42	Msi2	introns	No_boundary
chr14	30265733	30265862	130	-	1000	3.95786	3.07	3.41	Cacna1d	introns	No_boundary
chr3	52102954	52103119	166	-	1000	3.95786	3.11	3.46	Maml3	introns	No_boundary
chr1	168409093	168409129	37	-	1000	3.95558	3.23	3.59	Pbx1	introns	No_boundary
chr16	33046397	33046477	81	-	1000	3.95055	2.98	3.32	Iqcg	introns	No_boundary
chr8	120409167	120409258	92	+	1000	3.95055	3.12	3.47	Gse1	introns	No_boundary
chr1	172286916	172287032	117	-	1000	3.94889	3.06	3.4	Atp1a2	introns	Exon_intron_boundary
chr1	168307679	168307741	63	-	1000	3.94835	3.17	3.53	Pbx1	introns	No_boundary
chr1	168333017	168333073	57	-	1000	3.94835	2.98	3.32	Pbx1	introns	No_boundary
chr2	6869085	6869158	74	-	1000	3.94835	3.11	3.46	Celf2	introns	No_boundary
chr11	5981659	5981790	132	-	1000	3.94773	3.12	3.47	Camk2b	introns	No_boundary
chr9	34622480	34622581	102	+	1000	3.94374	3.04	3.37	Kirrel3	introns	No_boundary
chr11	118811105	118811189	85	-	1000	3.94161	3.16	3.52	Rbfox3	introns	Intron_exon_boundary
chr6	37243573	37243649	77	-	1000	3.94161	3.06	3.4	Dgki	introns	No_boundary
chr1	168305017	168305062	46	-	1000	3.94025	3.2	3.57	Pbx1	introns	No_boundary
chr11	108276033	108276128	96	-	1000	3.94025	2.98	3.31	Prkca	introns	No_boundary
chr11	118807926	118807975	50	-	1000	3.93772	3.17	3.54	Rbfox3	introns	No_boundary
chr17	27477555	27477641	87	-	1000	3.93772	2.98	3.31	Grm4	introns	No_boundary
chr7	68053817	68053912	96	+	1000	3.93772	3	3.33	Igf1r	introns	No_boundary
chr8	9540076	9540155	80	-	1000	3.93772	2.98	3.31	Nalf1	introns	No_boundary
chr9	108500317	108500420	104	+	1000	3.93772	3.15	3.5	Usp19	introns	Exon_intron_boundary
chr5	132333560	132333650	91	-	1000	3.93066	2.97	3.3	Auts2	introns	No_boundary
chr8	14327144	14327317	174	+	1000	3.93066	3.05	3.39	Dlgap2	introns	No_boundary
chr5	132425794	132425886	93	-	1000	3.93	3.11	3.46	Auts2	introns	No_boundary
chr9	34626261	34626345	85	+	1000	3.93	2.98	3.31	Kirrel3	introns	No_boundary
chr10	14011848	14011974	127	+	1000	3.9246	3.14	3.49	Hivep2	introns	No_boundary
chr8	9672065	9672187	123	-	1000	3.9179	3.06	3.4	Nalf1	introns	No_boundary
chr9	34513775	34513900	126	+	1000	3.9179	3.08	3.42	Kirrel3	introns	No_boundary
chr11	118807396	118807495	100	-	1000	3.91628	3.08	3.43	Rbfox3	introns	No_boundary
chr1	168415948	168416037	90	-	1000	3.91261	3.21	3.57	Pbx1	introns	No_boundary
chr5	27261671	27261772	102	+	1000	3.9119	2.98	3.32	Dpp6	introns	No_boundary
chr7	99482788	99482927	140	-	1000	3.9119	3.27	3.63	Rps3	introns	Exon_intron_boundary
chr8	14277837	14277986	150	+	1000	3.9119	3.06	3.41	Dlgap2	introns	No_boundary
chr8	14606130	14606245	116	+	1000	3.9119	3.07	3.42	Dlgap2	introns	No_boundary
chr1	168334879	168334934	56	-	1000	3.9063	3.14	3.49	Pbx1	introns	No_boundary
chr5	27117172	27117248	77	+	1000	3.90588	3.07	3.41	Dpp6	introns	No_boundary
chr9	34612614	34612701	88	+	1000	3.90588	3.17	3.54	Kirrel3	introns	No_boundary
chr5	132535394	132535453	60	-	1000	3.90535	3.08	3.42	Auts2	introns	No_boundary
chr1	168330691	168330731	41	-	1000	3.90424	3.11	3.46	Pbx1	introns	No_boundary
chr12	88874411	88874599	189	+	1000	3.89279	3.11	3.46	Nrxn3	introns	No_boundary
chr11	108318195	108318303	109	-	1000	3.89181	3.01	3.35	Prkca	introns	No_boundary
chr2	77610478	77610640	163	-	1000	3.89116	3.03	3.37	Zfp385b	introns	No_boundary
chr4	125595540	125595643	104	+	1000	3.89085	3.02	3.35	Grik3	introns	No_boundary
chr12	109565736	109565821	86	+	1000	3.89069	3.17	3.54	Meg3	introns	No_boundary
chr9	34536790	34536849	60	+	1000	3.88992	3.02	3.36	Kirrel3	introns	No_boundary
chr9	34747962	34748030	69	+	1000	3.88699	3.03	3.37	Kirrel3	introns	No_boundary
chr18	25659731	25659806	76	-	1000	3.88546	3	3.34	Celf4	introns	No_boundary
chr9	68806100	68806181	82	+	1000	3.88546	3.15	3.51	Rora	introns	No_boundary
chr15	74581907	74582013	107	+	1000	3.88346	3.06	3.4	Adgrb1	introns	No_boundary
chr1	168298627	168298694	68	-	1000	3.87956	3.17	3.53	Pbx1	introns	No_boundary
chr17	70170229	70170393	165	+	1000	3.87167	3.1	3.44	Dlgap1	introns	No_boundary
chr7	68027594	68027679	86	+	1000	3.8679	3.04	3.38	Igf1r	introns	No_boundary
chr16	9931186	9931282	97	-	1000	3.86522	3.01	3.35	Grin2a	introns	No_boundary
chr9	68758778	68758874	97	+	1000	3.86522	3	3.34	Rora	introns	No_boundary
chr8	47366547	47366661	115	-	1000	3.8649	3.08	3.42	Stox2	introns	No_boundary
chr18	84048756	84048817	62	-	1000	3.86372	2.95	3.28	Tshz1	introns	No_boundary
chr3	34340295	34340404	110	+	1000	3.86372	3.08	3.43	Sox2ot	introns	No_boundary
chr6	37211399	37211486	88	-	1000	3.86372	3.03	3.37	Dgki	introns	No_boundary
chr10	119825454	119825589	136	+	1000	3.86103	3.05	3.39	Grip1	introns	No_boundary
chr14	11723828	11723954	127	+	1000	3.86103	2.97	3.3	Ptprg	introns	No_boundary
chr16	34509097	34509150	54	-	1000	3.86103	3.09	3.44	Kalrn	introns	No_boundary
chr5	27101673	27101766	94	+	1000	3.86103	2.96	3.29	Dpp6	introns	No_boundary
chr7	49285008	49285145	138	+	1000	3.86103	2.95	3.28	Nav2	introns	No_boundary
chr9	34531802	34531882	81	+	1000	3.86066	3.11	3.45	Kirrel3	introns	No_boundary
chr1	89517767	89517926	160	+	1000	3.85596	3.02	3.36	Agap1	introns	No_boundary
chr9	45577328	45577419	92	+	1000	3.85596	3.03	3.37	Dscaml1	introns	No_boundary
chr11	118570683	118570764	82	-	1000	3.85288	3.2	3.57	Rbfox3	introns	No_boundary
chr11	118739183	118739251	69	-	1000	3.85288	2.95	3.28	Rbfox3	introns	No_boundary
chr6	113915110	113915226	117	-	1000	3.85288	2.97	3.3	Atp2b2	introns	No_boundary
chr8	47370568	47370709	142	-	1000	3.85288	2.97	3.29	Stox2	introns	No_boundary
chr5	116571371	116571492	122	-	1000	3.85032	3.05	3.39	Srrm4	introns	No_boundary
chr11	118794066	118794174	109	-	1000	3.84515	3.12	3.47	Rbfox3	introns	No_boundary
chr5	132206339	132206401	63	-	1000	3.84515	3	3.34	Auts2	introns	No_boundary
chr17	27510169	27510307	139	-	1000	3.84324	2.97	3.3	Grm4	introns	No_boundary
chr9	68841978	68842056	79	+	1000	3.84324	3.08	3.43	Rora	introns	No_boundary
chr17	27499579	27499664	86	-	1000	3.83989	2.99	3.32	Grm4	introns	No_boundary
chr12	88984399	88984500	102	+	1000	3.83708	2.97	3.3	Nrxn3	introns	No_boundary
chr18	25649015	25649193	179	-	1000	3.83609	3.1	3.45	Celf4	introns	No_boundary
chr2	179483192	179483305	114	+	1000	3.83609	3.07	3.41	Cdh4	introns	No_boundary
chr9	34741677	34741740	64	+	1000	3.83609	2.92	3.24	Kirrel3	introns	No_boundary
chr2	179488983	179489142	160	+	1000	3.83479	2.95	3.28	Cdh4	introns	No_boundary
chr6	113889246	113889324	79	-	1000	3.83479	3.07	3.42	Atp2b2	introns	No_boundary
chr9	45465710	45465770	61	+	1000	3.83479	2.92	3.25	Dscaml1	introns	No_boundary
chr2	156516090	156516248	159	+	1000	3.83455	3.24	3.6	Epb41l1	introns	No_boundary
chr8	9642286	9642355	70	-	1000	3.83455	2.97	3.3	Nalf1	introns	No_boundary
chr15	74571678	74571766	89	+	1000	3.82874	3.02	3.35	Adgrb1	introns	Exon_intron_boundary
chr8	14395599	14395763	165	+	1000	3.82874	3.16	3.52	Dlgap2	introns	No_boundary
chr5	74093526	74093648	123	+	1000	3.82481	3.28	3.64	Dancr	introns	Exon_intron_boundary
chr8	9612573	9612711	139	-	1000	3.81921	2.96	3.29	Nalf1	introns	No_boundary
chr8	14441539	14441663	125	+	1000	3.81491	2.99	3.32	Dlgap2	introns	No_boundary
chr11	24103462	24103567	106	+	1000	3.81364	2.93	3.26	Bcl11a	introns	No_boundary
chr19	48257889	48257999	111	+	1000	3.81201	3.03	3.37	Sorcs3	introns	No_boundary
chr8	9653118	9653226	109	-	1000	3.80593	3.15	3.51	Nalf1	introns	No_boundary
chr5	131953350	131953516	167	-	1000	3.80496	3.08	3.43	Auts2	introns	No_boundary
chr8	14575532	14575615	84	+	1000	3.80371	3.12	3.47	Dlgap2	introns	No_boundary
chr17	27483997	27484175	179	-	1000	3.80272	3.06	3.39	Grm4	introns	No_boundary
chr4	125498080	125498182	103	+	1000	3.79612	3	3.34	Grik3	introns	No_boundary
chr12	88951937	88952049	113	+	1000	3.7907	3.08	3.42	Nrxn3	introns	No_boundary
chr19	5844687	5844765	79	-	1000	3.78112	3.01	3.35	NA	introns	Exon_intron_boundary
chr1	168409873	168409957	85	-	1000	3.77838	3.03	3.37	Pbx1	introns	No_boundary
chr12	88875845	88875957	113	+	1000	3.77827	3.13	3.48	Nrxn3	introns	No_boundary
chr11	5997065	5997135	71	-	1000	3.77358	3.13	3.48	Camk2b	introns	No_boundary
chr4	155205165	155205253	89	-	1000	3.77358	2.93	3.25	Ski	introns	No_boundary
chr9	34602304	34602372	69	+	1000	3.77358	3	3.34	Kirrel3	introns	No_boundary
chr9	34492194	34492272	79	+	1000	3.76976	3	3.34	Kirrel3	introns	No_boundary
chr11	118571768	118571860	93	-	1000	3.7674	3.08	3.43	Rbfox3	introns	No_boundary
chr9	34620414	34620501	88	+	1000	3.76736	2.9	3.23	Kirrel3	introns	No_boundary
chr7	49293073	49293196	124	+	1000	3.76647	3	3.33	Nav2	introns	No_boundary
chr12	111789649	111789907	259	+	1000	3.76215	3.17	3.54	Klc1	introns	Exon_intron_boundary
chr5	132194791	132194872	82	-	1000	3.7588	2.96	3.29	Auts2	introns	No_boundary
chr8	9628037	9628182	146	-	1000	3.75843	3.15	3.51	Nalf1	introns	No_boundary
chr15	74551583	74551685	103	+	1000	3.74268	3.1	3.45	Adgrb1	introns	No_boundary
chr1	168381572	168381658	87	-	1000	3.7405	3.16	3.52	Pbx1	introns	No_boundary
chr1	170876697	170876788	92	-	1000	3.73796	3	3.34	Dusp12	introns	No_boundary
chr5	22751601	22751734	134	+	1000	3.73796	2.91	3.23	Lhfpl3	introns	No_boundary
chr16	9950972	9951131	160	-	1000	3.7348	3.01	3.35	Grin2a	introns	No_boundary
chr3	138781926	138782021	96	+	1000	3.72573	3.15	3.51	Tspan5	introns	No_boundary
chr3	87997463	87997575	113	-	1000	3.72573	3.13	3.49	Bcan	introns	Exon_intron_boundary
chr4	155197650	155197737	88	-	1000	3.72573	2.99	3.32	Ski	introns	No_boundary
chr7	49254271	49254357	87	+	1000	3.72573	2.92	3.25	Nav2	introns	No_boundary
chr9	34518808	34518898	91	+	1000	3.72515	3.02	3.36	Kirrel3	introns	No_boundary
chr9	45574633	45574789	157	+	1000	3.72515	3.12	3.47	Dscaml1	introns	No_boundary
chr16	67545878	67546023	146	-	1000	3.71988	2.94	3.27	Cadm2	introns	No_boundary
chr5	132409123	132409247	125	-	1000	3.71988	3.17	3.53	Auts2	introns	No_boundary
chr1	15435278	15435358	81	+	1000	3.7194	2.91	3.24	Kcnb2	introns	No_boundary
chr18	25675258	25675351	94	-	1000	3.7194	3.15	3.51	Celf4	introns	No_boundary
chr2	77663905	77664003	99	-	1000	3.7194	3.05	3.39	Zfp385b	introns	No_boundary
chr2	77681872	77682067	196	-	1000	3.7194	3.1	3.44	Zfp385b	introns	No_boundary
chr1	168333888	168333939	52	-	1000	3.71135	2.93	3.26	Pbx1	introns	No_boundary
chr8	117316110	117316180	71	+	1000	3.71061	2.93	3.26	Cmip	introns	No_boundary
chr8	120362684	120362765	82	+	1000	3.71061	2.99	3.33	Gse1	introns	No_boundary
chr11	118559547	118559677	131	-	1000	3.70681	3.07	3.41	Rbfox3	introns	No_boundary
chr19	6343032	6343179	148	+	1000	3.70681	3.14	3.5	Map4k2	cds	Exon_intron_boundary
chr3	138817549	138817668	120	+	1000	3.70681	3.04	3.38	Tspan5	introns	No_boundary
chr14	11582495	11582693	199	+	1000	3.70463	2.9	3.22	Ptprg	introns	No_boundary
chr16	9902434	9902526	93	-	1000	3.70463	2.9	3.22	Grin2a	introns	No_boundary
chr5	131888074	131888140	67	-	1000	3.70463	2.88	3.21	Auts2	introns	No_boundary
chr3	138768423	138768519	97	+	1000	3.70253	3.11	3.46	Tspan5	introns	No_boundary
chr8	120526015	120526103	89	+	1000	3.70253	2.88	3.2	Gse1	introns	No_boundary
chr9	45491298	45491427	130	+	1000	3.7025	3	3.34	Dscaml1	introns	No_boundary
chr5	132516874	132516974	101	-	1000	3.70062	2.97	3.3	Auts2	introns	No_boundary
chr1	168420383	168420428	46	-	1000	3.69024	3.16	3.53	Pbx1	introns	No_boundary
chr5	27079853	27079929	77	+	1000	3.68816	2.88	3.2	Dpp6	introns	No_boundary
chr14	11569429	11569556	128	+	1000	3.68715	2.89	3.21	Ptprg	introns	No_boundary
chr14	30248932	30249032	101	-	1000	3.68715	2.93	3.27	Cacna1d	introns	No_boundary
chr5	27071304	27071418	115	+	1000	3.68567	2.97	3.3	Dpp6	introns	No_boundary
chr14	30324113	30324182	70	-	1000	3.68434	2.91	3.24	Cacna1d	introns	No_boundary
chr8	14617738	14617811	74	+	1000	3.68434	2.97	3.3	Dlgap2	introns	No_boundary
chr9	68680359	68680452	94	+	1000	3.68422	2.88	3.2	Rora	introns	No_boundary
chr11	118878882	118878965	84	-	1000	3.68418	2.99	3.33	Rbfox3	introns	No_boundary
chr17	86257315	86257468	154	+	1000	3.68418	2.99	3.33	Prkce	introns	No_boundary
chr5	132413274	132413335	62	-	1000	3.68418	2.93	3.26	Auts2	introns	No_boundary
chr9	68935390	68935498	109	+	1000	3.68418	3.06	3.4	Rora	introns	No_boundary
chr11	6027429	6027526	98	-	1000	3.68307	2.88	3.2	Camk2b	introns	No_boundary
chr9	34556723	34556854	132	+	1000	3.68252	2.96	3.29	Kirrel3	introns	No_boundary
chr1	168427727	168427820	94	-	1000	3.68202	3.11	3.46	Pbx1	introns	Exon_intron_boundary
chr9	34539050	34539133	84	+	1000	3.68202	3.17	3.53	Kirrel3	introns	No_boundary
chr11	87778272	87778368	97	+	1000	3.68139	3.12	3.47	Tspoap1	cds	Exon_intron_boundary
chr5	26966304	26966415	112	+	1000	3.68139	2.87	3.19	Dpp6	introns	No_boundary
chr1	168362112	168362200	89	-	1000	3.6811	3.15	3.51	Pbx1	introns	No_boundary
chr5	125056468	125056582	115	-	1000	3.67543	3.04	3.38	Ncor2	introns	No_boundary
chr11	118599311	118599412	102	-	1000	3.67395	3.08	3.43	Rbfox3	introns	No_boundary
chr11	118792097	118792180	84	-	1000	3.67395	2.94	3.27	Rbfox3	introns	No_boundary
chr5	132442239	132442280	42	-	1000	3.67395	3.01	3.35	Auts2	introns	No_boundary
chr8	9671495	9671630	136	-	1000	3.67022	3.06	3.41	Nalf1	introns	No_boundary
chr11	118896399	118896502	104	-	1000	3.66938	3.1	3.45	Rbfox3	introns	No_boundary
chr5	27231488	27231658	171	+	1000	3.66938	3.03	3.36	Dpp6	introns	No_boundary
chr5	36876153	36876242	90	+	1000	3.66938	3.09	3.44	Ppp2r2c	introns	No_boundary
chr5	131766930	131766960	31	-	1000	3.66938	2.99	3.33	Auts2	introns	No_boundary
chr19	5841829	5841877	49	-	1000	3.66869	2.92	3.25	Neat1	exons	No_boundary
chr4	76507618	76507732	115	-	1000	3.66869	2.96	3.29	Ptprd	introns	No_boundary
chr2	151617928	151618053	126	-	1000	3.66583	2.91	3.24	Snph	introns	No_boundary
chr6	8951325	8951443	119	+	1000	3.66583	2.87	3.19	Nxph1	introns	No_boundary
chr2	26591828	26591985	158	+	1000	3.66539	2.9	3.22	Egfl7	introns	Exon_intron_boundary
chr8	120369082	120369174	93	+	1000	3.66539	2.97	3.31	Gse1	introns	No_boundary
chr9	97797999	97798143	145	-	1000	3.66539	2.95	3.28	Clstn2	introns	No_boundary
chr1	168279150	168279241	92	-	1000	3.66488	3.11	3.45	Pbx1	introns	No_boundary
chr9	34622825	34622937	113	+	1000	3.66488	3.11	3.46	Kirrel3	introns	No_boundary
chr5	36869763	36869898	136	+	1000	3.66386	2.97	3.3	Ppp2r2c	introns	No_boundary
chr9	68667931	68668059	129	+	1000	3.66386	2.9	3.22	Rora	introns	No_boundary
chr1	168371404	168371473	70	-	1000	3.6622	3.1	3.45	Pbx1	introns	No_boundary
chr1	59691940	59692012	73	+	1000	3.6616	3.01	3.35	Nop58	introns	Exon_intron_boundary
chr1	168300171	168300241	71	-	1000	3.65985	3.05	3.38	Pbx1	introns	No_boundary
chr5	27205187	27205293	107	+	1000	3.65985	2.99	3.33	Dpp6	introns	No_boundary
chr17	23811944	23812042	99	+	1000	3.65724	3.22	3.58	Srrm2	3UTRs	Exon_intron_boundary
chr11	118745373	118745535	163	-	1000	3.65472	3.11	3.45	Rbfox3	introns	No_boundary
chr8	85050233	85050272	40	+	1000	3.65472	3.17	3.54	Tnpo2	introns	Exon_intron_boundary
chr9	34625691	34625748	58	+	1000	3.65472	2.95	3.28	Kirrel3	introns	No_boundary
chr10	83036924	83037012	89	+	1000	3.65015	2.93	3.26	Chst11	introns	No_boundary
chr11	118574464	118574526	63	-	1000	3.65015	2.85	3.17	Rbfox3	introns	No_boundary
chr11	118593358	118593416	59	-	1000	3.65015	3.06	3.4	Rbfox3	introns	No_boundary
chr17	86177333	86177431	99	+	1000	3.65015	2.86	3.17	Prkce	3UTRs	Exon_intron_boundary
chr7	49260413	49260435	23	+	1000	3.65015	2.93	3.25	Nav2	introns	No_boundary
chr9	34539780	34539937	158	+	1000	3.64009	3.15	3.51	Kirrel3	introns	No_boundary
chr11	88688941	88689082	142	-	1000	3.63765	3.06	3.4	Msi2	introns	No_boundary
chr8	47287064	47287281	218	-	1000	3.63765	2.88	3.2	Stox2	introns	No_boundary
chr5	132391970	132392107	138	-	1000	3.63395	2.93	3.25	Auts2	introns	No_boundary
chr7	44335476	44335596	121	+	1000	3.63346	3.08	3.43	Shank1	introns	No_boundary
chr8	9689392	9689524	133	-	1000	3.62914	3.17	3.53	Nalf1	introns	No_boundary
chr2	6868866	6868959	94	-	1000	3.62547	2.99	3.32	Celf2	introns	No_boundary
chr5	27065643	27065761	119	+	1000	3.62547	2.98	3.32	Dpp6	introns	No_boundary
chr3	138836446	138836514	69	+	1000	3.62474	2.96	3.29	Tspan5	introns	No_boundary
chr2	115983984	115984055	72	-	1000	3.62412	2.9	3.23	Meis2	introns	No_boundary
chr5	132249086	132249162	77	-	1000	3.62412	3.05	3.39	Auts2	introns	No_boundary
chr11	6015150	6015267	118	-	1000	3.62395	3.18	3.54	Camk2b	introns	Exon_intron_boundary
chr9	34648260	34648380	121	+	1000	3.62395	2.98	3.31	Kirrel3	introns	No_boundary
chr3	138743329	138743450	122	+	1000	3.60439	3.1	3.44	Tspan5	introns	No_boundary
chr2	116030405	116030498	94	-	1000	3.60422	3.06	3.4	Meis2	introns	No_boundary
chr5	26960155	26960384	230	+	1000	3.60422	3	3.34	Dpp6	introns	No_boundary
chr8	9704083	9704164	82	-	1000	3.60422	2.86	3.17	Nalf1	introns	No_boundary
chr9	45568281	45568367	87	+	1000	3.60422	3.18	3.55	Dscaml1	introns	No_boundary
chr5	132506612	132506682	71	-	1000	3.59875	3.04	3.38	Auts2	introns	No_boundary
chr1	168276508	168276561	54	-	1000	3.59685	2.93	3.26	Pbx1	introns	No_boundary
chr11	6004262	6004452	191	-	1000	3.59685	3.06	3.4	Camk2b	introns	No_boundary
chr18	25622595	25622725	131	-	1000	3.59651	3.07	3.41	Celf4	introns	No_boundary
chr1	168289808	168289853	46	-	1000	3.5952	3.04	3.38	Pbx1	introns	No_boundary
chr13	8303392	8303571	180	+	1000	3.59486	2.97	3.3	Adarb2	introns	No_boundary
chr14	11780575	11780669	95	+	1000	3.59448	2.95	3.28	Ptprg	introns	No_boundary
chr18	25587779	25587883	105	-	1000	3.59448	2.98	3.31	Celf4	introns	No_boundary
chr5	27087506	27087584	79	+	1000	3.59448	2.98	3.31	Dpp6	introns	No_boundary
chr5	132249032	132249085	54	-	1000	3.59448	2.84	3.15	Auts2	introns	No_boundary
chr6	113885853	113885937	85	-	1000	3.59448	3.15	3.51	Atp2b2	introns	No_boundary
chr8	9660403	9660553	151	-	1000	3.58875	2.9	3.23	Nalf1	introns	No_boundary
chr1	168276941	168277094	154	-	1000	3.57682	3.12	3.47	Pbx1	introns	No_boundary
chr5	27117350	27117455	106	+	1000	3.57682	2.89	3.21	Dpp6	introns	No_boundary
chr1	168356231	168356418	188	-	1000	3.57269	2.86	3.18	Pbx1	introns	No_boundary
chr1	168335098	168335175	78	-	1000	3.56846	3.06	3.4	Pbx1	introns	No_boundary
chr9	45470521	45470599	79	+	1000	3.56543	2.88	3.2	Dscaml1	introns	No_boundary
chr7	49249338	49249480	143	+	1000	3.55904	3.18	3.55	Nav2	introns	No_boundary
chr8	120397207	120397365	159	+	1000	3.55904	2.88	3.2	Gse1	introns	No_boundary
chr9	68843044	68843136	93	+	1000	3.55904	2.9	3.23	Rora	introns	No_boundary
chr11	118783736	118783864	129	-	1000	3.55574	2.84	3.15	Rbfox3	introns	No_boundary
chr9	68785151	68785280	130	+	1000	3.55574	3.08	3.43	Rora	introns	No_boundary
chr6	21404724	21404850	127	+	1000	3.55474	2.93	3.26	Kcnd2	introns	No_boundary
chr1	168284682	168284752	71	-	1000	3.55145	2.82	3.14	Pbx1	introns	No_boundary
chr1	168375509	168375580	72	-	1000	3.55074	3.07	3.41	Pbx1	introns	No_boundary
chr1	168411312	168411448	137	-	1000	3.55074	3.13	3.49	Pbx1	introns	No_boundary
chr11	57038114	57038216	103	+	1000	3.55074	3.01	3.35	Gria1	introns	No_boundary
chr5	27100551	27100756	206	+	1000	3.54957	3.07	3.42	Dpp6	introns	No_boundary
chr17	70669079	70669240	162	+	1000	3.54577	3.06	3.39	Dlgap1	introns	No_boundary
chr9	34499072	34499161	90	+	1000	3.54577	2.86	3.18	Kirrel3	introns	No_boundary
chr1	168297588	168297633	46	-	1000	3.54526	3.02	3.36	Pbx1	introns	No_boundary
chr11	5976471	5976557	87	-	1000	3.54526	2.97	3.31	Camk2b	introns	No_boundary
chr5	27151219	27151276	58	+	1000	3.54526	2.91	3.23	Dpp6	introns	No_boundary
chr2	156524178	156524272	95	+	1000	3.53612	2.89	3.21	Epb41l1	introns	No_boundary
chr11	118605743	118605827	85	-	1000	3.5279	3.04	3.37	Rbfox3	introns	No_boundary
chr9	68817219	68817320	102	+	1000	3.5279	2.84	3.16	Rora	introns	No_boundary
chr1	89493266	89493348	83	+	1000	3.52771	2.85	3.17	Agap1	introns	No_boundary
chr3	153643702	153643807	106	-	1000	3.52771	2.92	3.25	St6galnac3	introns	No_boundary
chr4	125519694	125519788	95	+	1000	3.52771	2.84	3.15	Grik3	introns	No_boundary
chr7	68006503	68006612	110	+	1000	3.52771	3.12	3.47	Igf1r	introns	No_boundary
chr9	105819459	105819566	108	-	1000	3.52517	3.17	3.53	Col6a6	introns	No_boundary
chr6	124715418	124715496	79	+	1000	3.52382	2.93	3.26	Phb2	introns	Exon_intron_boundary
chr17	86258350	86258468	119	+	1000	3.52309	2.84	3.15	Prkce	introns	No_boundary
chr8	14643934	14644016	83	+	1000	3.52309	3.01	3.35	Dlgap2	introns	No_boundary
chr9	45524303	45524378	76	+	1000	3.52309	2.87	3.18	Dscaml1	introns	No_boundary
chr12	109567609	109567670	62	+	1000	3.52096	2.99	3.33	Meg3	introns	No_boundary
chr3	34219475	34219571	97	+	1000	3.51824	3.04	3.38	Sox2ot	introns	No_boundary
chr1	168305129	168305256	128	-	1000	3.51737	3.14	3.49	Pbx1	introns	No_boundary
chr15	74559163	74559251	89	+	1000	3.51162	2.98	3.32	Adgrb1	introns	No_boundary
chr8	14384587	14384671	85	+	1000	3.51162	2.88	3.2	Dlgap2	introns	No_boundary
chr5	131766987	131767066	80	-	1000	3.50903	2.85	3.17	Auts2	introns	No_boundary
chr5	132502855	132502946	92	-	1000	3.50755	2.89	3.22	Auts2	introns	No_boundary
chr9	68711837	68711927	91	+	1000	3.50755	2.96	3.29	Rora	introns	No_boundary
chr12	89001568	89001644	77	+	1000	3.50578	2.81	3.12	Nrxn3	introns	No_boundary
chr5	132204078	132204178	101	-	1000	3.50578	2.86	3.18	Auts2	introns	No_boundary
chr9	68806426	68806498	73	+	1000	3.50578	2.94	3.27	Rora	introns	No_boundary
chr11	88641978	88642086	109	-	1000	3.50551	2.81	3.12	Msi2	introns	No_boundary
chr6	137259143	137259203	61	+	1000	3.50551	2.83	3.14	Ptpro	introns	No_boundary
chr7	111732220	111732385	166	-	1000	3.50551	2.88	3.2	Galnt18	introns	No_boundary
chr8	9671881	9671947	67	-	1000	3.50201	2.9	3.23	Nalf1	introns	No_boundary
chr1	15529884	15530051	168	+	1000	3.50118	3.14	3.5	Kcnb2	introns	No_boundary
chr1	15552337	15552484	148	+	1000	3.49937	2.95	3.28	Kcnb2	introns	No_boundary
chr12	89715232	89715376	145	+	1000	3.49937	2.98	3.31	Nrxn3	introns	No_boundary
chr5	27089620	27089743	124	+	1000	3.49937	2.81	3.12	Dpp6	introns	No_boundary
chr3	138788637	138788754	118	+	1000	3.49462	3.03	3.37	Tspan5	introns	No_boundary
chr7	49280585	49280673	89	+	1000	3.4927	2.99	3.32	Nav2	introns	No_boundary
chr1	168308790	168308853	64	-	1000	3.49039	2.81	3.12	Pbx1	introns	No_boundary
chr2	167149975	167150112	138	-	1000	3.48759	2.95	3.28	Kcnb1	introns	No_boundary
chr2	173256742	173256814	73	-	1000	3.48759	2.86	3.18	Pmepa1	introns	No_boundary
chr4	151766381	151766437	57	-	1000	3.48759	2.82	3.13	Camta1	introns	No_boundary
chr9	34503314	34503409	96	+	1000	3.4843	2.89	3.21	Kirrel3	introns	No_boundary
chr12	107950446	107950534	89	-	1000	3.4842	2.9	3.23	Bcl11b	introns	No_boundary
chr14	11619846	11619931	86	+	1000	3.4842	2.88	3.2	Ptprg	introns	No_boundary
chr2	179488351	179488469	119	+	1000	3.48259	3.05	3.39	Cdh4	introns	No_boundary
chr3	138824451	138824569	119	+	1000	3.48259	2.9	3.23	Tspan5	introns	No_boundary
chr4	125556590	125556672	83	+	1000	3.48259	2.93	3.26	Grik3	introns	No_boundary
chr11	118777384	118777524	141	-	1000	3.47582	2.97	3.29	Rbfox3	introns	No_boundary
chr16	9931781	9931899	119	-	1000	3.47277	3.03	3.37	Grin2a	introns	No_boundary
chr9	34544872	34544957	86	+	1000	3.47277	3.07	3.41	Kirrel3	introns	No_boundary
chr9	34637392	34637554	163	+	1000	3.47277	2.81	3.12	Kirrel3	introns	No_boundary
chr9	68770557	68770649	93	+	1000	3.47277	2.96	3.29	Rora	introns	No_boundary
chr1	168342144	168342246	103	-	1000	3.47236	2.88	3.2	Pbx1	introns	No_boundary
chr9	34593267	34593361	95	+	1000	3.47225	2.94	3.27	Kirrel3	introns	No_boundary
chr11	118567312	118567383	72	-	1000	3.47137	2.89	3.21	Rbfox3	introns	No_boundary
chr8	120362235	120362303	69	+	1000	3.47137	2.99	3.32	Gse1	introns	No_boundary
chr11	118575579	118575644	66	-	1000	3.47062	2.95	3.28	Rbfox3	introns	No_boundary
chr11	118578103	118578237	135	-	1000	3.47062	2.85	3.16	Rbfox3	introns	No_boundary
chr5	146834838	146834899	62	+	1000	3.47062	3.06	3.4	Rpl21	introns	Exon_intron_boundary
chr11	118656320	118656413	94	-	1000	3.46941	2.94	3.28	Rbfox3	introns	No_boundary
chr2	6817638	6817755	118	-	1000	3.46719	2.91	3.24	Celf2	introns	No_boundary
chr5	132531085	132531196	112	-	1000	3.46719	2.93	3.26	Auts2	introns	No_boundary
chr4	125512854	125513010	157	+	1000	3.46466	2.94	3.27	Grik3	introns	No_boundary
chr4	125535860	125535949	90	+	1000	3.46466	2.79	3.11	Grik3	introns	No_boundary
chr9	68746052	68746121	70	+	1000	3.46466	2.79	3.1	Rora	introns	No_boundary
chr9	34533928	34534049	122	+	1000	3.46287	2.88	3.2	Kirrel3	introns	No_boundary
chr8	9692949	9693047	99	-	1000	3.4579	2.86	3.18	Nalf1	introns	No_boundary
chr9	34508965	34509053	89	+	1000	3.4579	3	3.33	Kirrel3	introns	No_boundary
chr5	27076184	27076256	73	+	1000	3.4525	2.87	3.19	Dpp6	introns	No_boundary
chr8	9764573	9764743	171	-	1000	3.45062	2.88	3.21	Nalf1	introns	No_boundary
chr11	108151391	108151514	124	-	1000	3.45042	3	3.34	Prkca	introns	No_boundary
chr1	168423397	168423557	161	-	1000	3.44641	3.13	3.48	Pbx1	introns	No_boundary
chr1	168343164	168343194	31	-	1000	3.44373	2.83	3.15	Pbx1	introns	No_boundary
chrX	103461523	103461602	80	-	1000	3.44373	2.83	3.15	Xist	introns	No_boundary
chr8	14552712	14552911	200	+	1000	3.44176	3.03	3.36	Dlgap2	introns	No_boundary
chr9	34613832	34613909	78	+	1000	3.4322	2.94	3.27	Kirrel3	introns	No_boundary
chr1	168319065	168319125	61	-	1000	3.42554	3.1	3.45	Pbx1	introns	No_boundary
chr10	76886293	76886366	74	-	1000	3.42303	2.84	3.16	Pcbp3	introns	No_boundary
chr2	181586553	181586690	138	-	1000	3.42303	2.87	3.19	Zfp512b	introns	Exon_intron_boundary
chr4	125542617	125542737	121	+	1000	3.42303	2.87	3.19	Grik3	introns	No_boundary
chr5	27145306	27145425	120	+	1000	3.42045	3.02	3.36	Dpp6	introns	No_boundary
chr5	132511213	132511294	82	-	1000	3.42045	2.89	3.22	Auts2	introns	No_boundary
chr1	168290444	168290531	88	-	1000	3.41994	2.96	3.29	Pbx1	introns	No_boundary
chr12	111790582	111790703	122	+	1000	3.41994	2.78	3.1	Klc1	introns	No_boundary
chr10	13968254	13968398	145	+	1000	3.41881	2.98	3.32	Hivep2	introns	No_boundary
chr18	25659233	25659334	102	-	1000	3.41837	2.99	3.32	Celf4	introns	No_boundary
chr12	88984538	88984624	87	+	1000	3.4139	3.06	3.4	Nrxn3	introns	No_boundary
chr5	131746359	131746425	67	-	1000	3.4139	3	3.34	Auts2	introns	No_boundary
chr5	132214042	132214135	94	-	1000	3.4139	3.04	3.37	Auts2	introns	No_boundary
chr5	112219475	112219589	115	-	1000	3.4131	2.79	3.1	Miat	exons	No_boundary
chr8	14334731	14334862	132	+	1000	3.4131	2.84	3.16	Dlgap2	introns	No_boundary
chr8	14615369	14615465	97	+	1000	3.4131	2.87	3.19	Dlgap2	introns	No_boundary
chr8	9460552	9460668	117	-	1000	3.4131	2.82	3.13	Nalf1	introns	No_boundary
chr2	6819215	6819290	76	-	1000	3.41173	2.91	3.24	Celf2	introns	No_boundary
chr11	81101841	81101999	159	-	1000	3.4111	2.8	3.11	Asic2	introns	No_boundary
chr17	5207151	5207253	103	+	1000	3.4111	3.03	3.36	Arid1b	introns	No_boundary
chr1	168354390	168354444	55	-	1000	3.40756	2.83	3.14	Pbx1	introns	No_boundary
chr15	74563303	74563519	217	+	1000	3.40318	3.13	3.48	Adgrb1	5UTRs	Exon_intron_boundary
chr17	70685578	70685718	141	+	1000	3.39677	3.07	3.41	Dlgap1	introns	No_boundary
chr18	25662547	25662679	133	-	1000	3.39415	2.77	3.09	Celf4	introns	No_boundary
chr8	9693758	9693821	64	-	1000	3.39415	2.87	3.19	Nalf1	introns	No_boundary
chrX	14315416	14315489	74	-	1000	3.39415	3.13	3.48	NA	exons	Intron_exon_boundary
chr10	127283683	127283824	142	-	1000	3.39309	2.89	3.21	Mbd6	cds	Exon_intron_boundary
chr1	15409102	15409186	85	+	1000	3.39068	2.83	3.14	Kcnb2	introns	No_boundary
chr1	168370426	168370531	106	-	1000	3.38887	2.82	3.13	Pbx1	introns	No_boundary
chr11	108298418	108298491	74	-	1000	3.38469	2.83	3.14	Prkca	introns	No_boundary
chr9	68923437	68923538	102	+	1000	3.38469	2.83	3.14	Rora	introns	No_boundary
chr11	6002336	6002599	264	-	1000	3.38308	3.09	3.44	Camk2b	introns	No_boundary
chr1	15315139	15315236	98	+	1000	3.37377	2.95	3.28	Kcnb2	introns	No_boundary
chr3	34224699	34224807	109	+	1000	3.37135	2.8	3.12	Sox2ot	introns	No_boundary
chr11	118726173	118726249	77	-	1000	3.36961	2.85	3.16	Rbfox3	introns	No_boundary
chr11	118727985	118728050	66	-	1000	3.36961	2.83	3.15	Rbfox3	introns	No_boundary
chr11	118744492	118744554	63	-	1000	3.36961	2.83	3.15	Rbfox3	introns	No_boundary
chr2	179641200	179641285	86	+	1000	3.36961	2.86	3.17	Cdh4	introns	No_boundary
chr4	151747217	151747321	105	-	1000	3.36961	2.83	3.14	Camta1	introns	No_boundary
chr5	36326226	36326351	126	-	1000	3.36961	2.89	3.21	Sorcs2	introns	No_boundary
chr8	14574628	14574743	116	+	1000	3.36961	2.95	3.28	Dlgap2	introns	No_boundary
chr12	88963302	88963398	97	+	1000	3.36653	2.92	3.25	Nrxn3	introns	No_boundary
chr9	34553448	34553500	53	+	1000	3.36447	2.9	3.23	Kirrel3	introns	No_boundary
chr5	132418873	132418973	101	-	1000	3.35888	2.95	3.28	Auts2	introns	No_boundary
chr4	125540906	125541051	146	+	1000	3.35769	2.85	3.17	Grik3	introns	No_boundary
chr5	26934997	26935138	142	+	1000	3.35769	2.89	3.21	Dpp6	introns	No_boundary
chr6	136154357	136154496	140	-	1000	3.35769	2.85	3.16	Grin2b	introns	No_boundary
chr7	91091585	91091677	93	+	1000	3.35769	2.83	3.15	Dlg2	introns	No_boundary
chr5	132247132	132247260	129	-	1000	3.35758	2.95	3.28	Auts2	introns	No_boundary
chr11	6064117	6064208	92	-	1000	3.35677	3.02	3.36	Camk2b	introns	No_boundary
chr5	131759136	131759297	162	-	1000	3.35455	3.05	3.38	Auts2	introns	No_boundary
chr17	26968829	26968895	67	+	1000	3.35037	2.84	3.15	Syngap1	introns	No_boundary
chr9	34734909	34734988	80	+	1000	3.35037	2.88	3.2	Kirrel3	introns	No_boundary
chr2	179531362	179531456	95	+	1000	3.34562	2.79	3.11	Cdh4	introns	No_boundary
chr4	125534378	125534436	59	+	1000	3.34562	2.87	3.19	Grik3	introns	No_boundary
chr2	179515560	179515685	126	+	1000	3.34559	2.83	3.14	Cdh4	introns	No_boundary
chr5	132486671	132486701	31	-	1000	3.34559	2.78	3.09	Auts2	introns	No_boundary
chr9	68811914	68812061	148	+	1000	3.34559	2.94	3.27	Rora	introns	No_boundary
chr7	45123030	45123108	79	-	1000	3.34416	3.1	3.45	Rps11	introns	Exon_intron_boundary
chr9	34705080	34705164	85	+	1000	3.34416	2.83	3.15	Kirrel3	introns	No_boundary
chr1	15327215	15327356	142	+	1000	3.34359	2.78	3.1	Kcnb2	introns	No_boundary
chr9	34657999	34658203	205	+	1000	3.34215	2.95	3.28	Kirrel3	introns	No_boundary
chr1	168421965	168422043	79	-	1000	3.34161	2.92	3.25	Pbx1	introns	No_boundary
chr11	5995163	5995291	129	-	1000	3.34045	2.93	3.26	Camk2b	introns	No_boundary
chr2	156518188	156518268	81	+	1000	3.33888	2.98	3.31	Epb41l1	introns	No_boundary
chr2	77667484	77667649	166	-	1000	3.33888	2.79	3.11	Zfp385b	introns	No_boundary
chr8	14276696	14276812	117	+	1000	3.33888	2.97	3.3	Dlgap2	introns	No_boundary
chr9	34785320	34785408	89	+	1000	3.33888	2.86	3.18	Kirrel3	introns	No_boundary
chr3	138800630	138800708	79	+	1000	3.33133	2.98	3.31	Tspan5	introns	No_boundary
chr5	132206722	132206774	53	-	1000	3.33133	2.81	3.12	Auts2	introns	No_boundary
chr8	120496904	120497012	109	+	1000	3.32923	2.95	3.28	Gse1	introns	No_boundary
chr5	36385897	36386040	144	-	1000	3.32778	3.06	3.4	Sorcs2	introns	No_boundary
chr6	113877690	113877831	142	-	1000	3.32778	2.98	3.32	Atp2b2	introns	No_boundary
chr11	108152602	108152735	134	-	1000	3.32268	2.8	3.11	Prkca	introns	No_boundary
chr11	118602892	118603002	111	-	1000	3.32268	2.77	3.09	Rbfox3	introns	No_boundary
chr11	118780059	118780136	78	-	1000	3.32268	2.75	3.06	Rbfox3	introns	No_boundary
chr7	49253164	49253234	71	+	1000	3.32268	2.82	3.13	Nav2	introns	No_boundary
chr7	49270162	49270282	121	+	1000	3.32268	3.02	3.36	Nav2	introns	No_boundary
chr8	117259988	117260070	83	+	1000	3.32268	2.74	3.06	Cmip	introns	No_boundary
chr9	68711505	68711565	61	+	1000	3.32268	2.96	3.29	Rora	introns	No_boundary
chr9	45483558	45483680	123	+	1000	3.3216	2.91	3.23	Dscaml1	introns	No_boundary
chr7	49283090	49283217	128	+	1000	3.32098	2.75	3.06	Nav2	introns	No_boundary
chr8	14267515	14267600	86	+	1000	3.32098	3.05	3.38	Dlgap2	introns	No_boundary
chr9	45509046	45509127	82	+	1000	3.32098	3.08	3.43	Dscaml1	introns	No_boundary
chr9	45559418	45559485	68	+	1000	3.32098	2.94	3.27	Dscaml1	introns	No_boundary
chr12	88955270	88955344	75	+	1000	3.32089	2.81	3.12	Nrxn3	introns	No_boundary
chrX	103466572	103466730	159	-	1000	3.31786	3.02	3.36	Xist	exons	No_boundary
chr5	132227299	132227446	148	-	1000	3.31687	2.74	3.05	Auts2	introns	No_boundary
chr2	6816140	6816251	112	-	1000	3.30839	2.88	3.2	Celf2	introns	No_boundary
chr12	109567098	109567239	142	+	1000	3.3083	3.14	3.49	Meg3	introns	No_boundary
chr12	89653469	89653571	103	+	1000	3.30159	2.78	3.09	Nrxn3	introns	No_boundary
chr12	109548941	109549004	64	+	1000	3.30125	2.79	3.11	Meg3	introns	Exon_intron_boundary
chr8	9539241	9539392	152	-	1000	3.2995	2.89	3.22	Nalf1	introns	No_boundary
chr5	132027121	132027190	70	-	1000	3.29817	2.87	3.18	Auts2	introns	No_boundary
chr11	118608243	118608316	74	-	1000	3.29773	3.01	3.35	Rbfox3	introns	No_boundary
chr14	30272721	30272832	112	-	1000	3.29773	2.99	3.33	Cacna1d	introns	No_boundary
chr16	12078551	12078661	111	+	1000	3.29773	2.75	3.06	Shisa9	introns	No_boundary
chr4	125562474	125562560	87	+	1000	3.29773	2.93	3.26	Grik3	introns	No_boundary
chr5	137524454	137524530	77	+	1000	3.29735	2.84	3.15	Gigyf1	introns	Exon_intron_boundary
chr9	34535213	34535283	71	+	1000	3.29673	2.96	3.29	Kirrel3	introns	No_boundary
chr5	132382070	132382149	80	-	1000	3.29444	3	3.34	Auts2	introns	No_boundary
chr5	131992532	131992637	106	-	1000	3.29315	3.05	3.39	Auts2	introns	No_boundary
chr9	34556346	34556465	120	+	1000	3.29315	2.81	3.12	Kirrel3	introns	No_boundary
chr5	132425932	132426104	173	-	1000	3.29163	2.89	3.22	Auts2	introns	No_boundary
chr1	75257391	75257651	261	-	1000	3.28969	2.83	3.14	Ptprn	cds	Exon_intron_boundary
chr3	138804114	138804256	143	+	1000	3.28969	2.98	3.31	Tspan5	introns	No_boundary
chr8	14445972	14446056	85	+	1000	3.28969	2.81	3.13	Dlgap2	introns	No_boundary
chr1	168357834	168357974	141	-	1000	3.28827	3.06	3.4	Pbx1	introns	No_boundary
chr11	57087202	57087354	153	+	1000	3.28646	3.03	3.37	Gria1	introns	No_boundary
chr11	118594454	118594594	141	-	1000	3.28477	2.83	3.14	Rbfox3	introns	No_boundary
chr9	34698375	34698469	95	+	1000	3.28477	2.95	3.28	Kirrel3	introns	No_boundary
chr9	68892460	68892549	90	+	1000	3.28477	2.92	3.24	Rora	introns	No_boundary
chr11	118592283	118592338	56	-	1000	3.28226	2.73	3.05	Rbfox3	introns	No_boundary
chr17	27667325	27667412	88	+	1000	3.28226	2.77	3.09	Pacsin1	introns	No_boundary
chrX	56789390	56789465	76	+	1000	3.28226	2.85	3.17	Fhl1	introns	Exon_intron_boundary
chr11	118729011	118729110	100	-	1000	3.28081	2.92	3.24	Rbfox3	introns	No_boundary
chr2	179540372	179540482	111	+	1000	3.28081	2.88	3.2	Cdh4	introns	No_boundary
chr8	14327782	14327843	62	+	1000	3.28081	2.81	3.12	Dlgap2	introns	No_boundary
chr12	88902800	88902916	117	+	1000	3.27951	2.83	3.14	Nrxn3	introns	No_boundary
chr10	108532931	108533021	91	-	1000	3.27685	2.82	3.14	Syt1	introns	No_boundary
chr18	25651389	25651439	51	-	1000	3.27685	2.78	3.1	Celf4	introns	No_boundary
chr4	155212390	155212440	51	-	1000	3.27685	2.72	3.04	Ski	introns	No_boundary
chr7	49256288	49256344	57	+	1000	3.27685	2.79	3.1	Nav2	introns	No_boundary
chr8	120361956	120362035	80	+	1000	3.27685	2.87	3.19	Gse1	introns	No_boundary
chr5	132530084	132530200	117	-	1000	3.26935	2.74	3.05	Auts2	introns	No_boundary
chr1	155954596	155954659	64	+	1000	3.26817	3.08	3.42	NA	exons	Exon_intron_boundary
chr11	108339141	108339210	70	-	1000	3.26817	2.9	3.22	Prkca	introns	No_boundary
chr18	25659941	25660074	134	-	1000	3.26817	2.77	3.08	Celf4	introns	No_boundary
chr9	45465228	45465328	101	+	1000	3.26582	2.8	3.11	Dscaml1	introns	No_boundary
chr1	75551919	75551987	69	+	1000	3.26458	2.74	3.05	Slc4a3	introns	Exon_intron_boundary
chr8	121904354	121904443	90	-	1000	3.26458	2.79	3.11	Slc7a5	introns	No_boundary
chr1	168332254	168332367	114	-	1000	3.26008	2.99	3.32	Pbx1	introns	No_boundary
chr11	118908082	118908178	97	-	1000	3.25878	2.92	3.25	Rbfox3	introns	No_boundary
chr12	88996948	88997067	120	+	1000	3.25878	2.9	3.22	Nrxn3	introns	No_boundary
chr14	30327224	30327312	89	-	1000	3.25878	2.96	3.28	Cacna1d	introns	No_boundary
chr8	14268739	14268832	94	+	1000	3.25878	2.9	3.22	Dlgap2	introns	No_boundary
chr8	71662571	71662685	115	-	1000	3.25878	2.76	3.07	Unc13a	introns	Exon_intron_boundary
chr1	15545773	15545874	102	+	1000	3.25306	3.02	3.36	Kcnb2	introns	No_boundary
chr11	60144536	60144669	134	+	1000	3.25306	2.72	3.03	Rai1	introns	No_boundary
chr11	118601283	118601379	97	-	1000	3.25306	2.98	3.31	Rbfox3	introns	No_boundary
chr9	45459406	45459468	63	+	1000	3.25306	2.73	3.04	Dscaml1	introns	No_boundary
chr12	88875730	88875810	81	+	1000	3.25218	2.87	3.19	Nrxn3	introns	No_boundary
chr3	156641156	156641351	196	+	1000	3.24934	2.99	3.33	Negr1	introns	No_boundary
chr1	168420073	168420152	80	-	1000	3.24775	3.04	3.38	Pbx1	introns	No_boundary
chr5	132464796	132464878	83	-	1000	3.24681	2.8	3.11	Auts2	introns	No_boundary
chr9	34496263	34496391	129	+	1000	3.24681	3.09	3.44	Kirrel3	introns	No_boundary
chr12	3813248	3813322	75	+	1000	3.24521	2.98	3.31	Dnmt3a	introns	No_boundary
chr12	3830086	3830186	101	+	1000	3.24521	2.78	3.09	Dnmt3a	introns	No_boundary
chr19	5829706	5829770	65	-	1000	3.24521	2.93	3.26	Neat1	exons	No_boundary
chr11	6002654	6002754	101	-	1000	3.24032	2.92	3.25	Camk2b	introns	No_boundary
chr11	118778054	118778158	105	-	1000	3.24032	2.75	3.07	Rbfox3	introns	No_boundary
chr12	89813765	89813849	85	+	1000	3.24032	2.9	3.22	Nrxn3	introns	No_boundary
chr18	84061215	84061316	102	-	1000	3.24032	2.99	3.33	Tshz1	introns	No_boundary
chr5	27117630	27117686	57	+	1000	3.24032	2.87	3.19	Dpp6	introns	No_boundary
chr1	135531582	135531683	102	-	1000	3.23851	2.93	3.26	Nav1	introns	No_boundary
chr13	99479975	99480087	113	-	1000	3.23851	2.81	3.13	Map1b	introns	No_boundary
chr17	86252413	86252468	56	+	1000	3.23851	2.85	3.17	Prkce	introns	No_boundary
chr3	51799576	51799658	83	-	1000	3.23851	2.77	3.09	Maml3	introns	No_boundary
chr9	22050239	22050311	73	-	1000	3.23851	2.84	3.15	Zfp653	introns	No_boundary
chr8	9610142	9610233	92	-	1000	3.2325	2.88	3.21	Nalf1	introns	No_boundary
chr10	127192737	127192918	182	-	1000	3.23238	2.74	3.05	Dtx3	cds	Exon_intron_boundary
chr5	131720921	131720999	79	-	1000	3.23228	2.89	3.21	Auts2	introns	No_boundary
chr5	27149440	27149592	153	+	1000	3.23203	2.99	3.33	Dpp6	introns	No_boundary
chr6	21442043	21442149	107	+	1000	3.23203	2.76	3.08	Kcnd2	introns	No_boundary
chr15	74561948	74562178	231	+	1000	3.22109	2.76	3.08	Adgrb1	introns	No_boundary
chr9	68665393	68665501	109	+	1000	3.2205	2.81	3.12	Rora	introns	No_boundary
chr16	91656175	91656319	145	+	1000	3.21672	2.91	3.24	Son	cds	No_boundary
chr11	108334248	108334313	66	-	1000	3.21182	2.9	3.22	Prkca	introns	No_boundary
chr5	27120047	27120100	54	+	1000	3.21182	2.85	3.17	Dpp6	introns	No_boundary
chr8	117281177	117281250	74	+	1000	3.21182	2.71	3.02	Cmip	introns	No_boundary
chr7	49248240	49248364	125	+	1000	3.21101	2.86	3.18	Nav2	introns	No_boundary
chr7	49251483	49251558	76	+	1000	3.21101	2.85	3.16	Nav2	introns	No_boundary
chr8	47287570	47287660	91	-	1000	3.21101	2.76	3.08	Stox2	introns	Exon_intron_boundary
chr9	45475868	45475952	85	+	1000	3.21101	2.94	3.27	Dscaml1	introns	No_boundary
chr12	88958501	88958579	79	+	1000	3.20759	3	3.34	Nrxn3	introns	No_boundary
chr2	77672164	77672259	96	-	1000	3.20759	2.73	3.04	Zfp385b	introns	No_boundary
chr5	27120404	27120513	110	+	1000	3.20084	3.08	3.42	Dpp6	introns	No_boundary
chr9	34593969	34594066	98	+	1000	3.19591	2.91	3.24	Kirrel3	introns	No_boundary
chr9	34723730	34723857	128	+	1000	3.19591	2.86	3.17	Kirrel3	introns	No_boundary
chr9	45458866	45458957	92	+	1000	3.19591	2.88	3.21	Dscaml1	introns	No_boundary
chr1	168291698	168291794	97	-	1000	3.18934	2.91	3.24	Pbx1	introns	No_boundary
chr3	156660198	156660350	153	+	1000	3.18934	2.82	3.13	Negr1	introns	No_boundary
chr5	27116834	27116907	74	+	1000	3.18597	2.91	3.24	Dpp6	introns	No_boundary
chr9	45467628	45467699	72	+	1000	3.18597	3	3.34	Dscaml1	introns	No_boundary
chr8	9672751	9672875	125	-	1000	3.18513	2.93	3.27	Nalf1	introns	No_boundary
chr8	117312163	117312286	124	+	1000	3.18422	2.8	3.11	Cmip	introns	No_boundary
chr9	45465963	45466060	98	+	1000	3.18422	2.76	3.07	Dscaml1	introns	No_boundary
chr16	9911166	9911276	111	-	1000	3.18334	2.77	3.09	Grin2a	introns	No_boundary
chr17	27666165	27666276	112	+	1000	3.18334	2.69	3	Pacsin1	introns	No_boundary
chr3	153911611	153911696	86	-	1000	3.18334	2.97	3.31	Rabggtb	introns	Exon_intron_boundary
chr5	26907179	26907244	66	+	1000	3.18334	2.77	3.09	Dpp6	introns	No_boundary
chr5	26935467	26935538	72	+	1000	3.18334	2.79	3.11	Dpp6	introns	No_boundary
chr5	27242951	27243092	142	+	1000	3.18334	2.94	3.27	Dpp6	introns	No_boundary
chr8	124433186	124433295	110	-	1000	3.18334	2.73	3.05	Pgbd5	introns	No_boundary
chr10	76787967	76788098	132	-	1000	3.18144	2.98	3.31	Pcbp3	introns	Exon_intron_boundary
chr11	108189164	108189232	69	-	1000	3.18088	2.75	3.06	Prkca	introns	No_boundary
chr4	156168003	156168112	110	-	1000	3.18088	2.84	3.16	Agrn	introns	Exon_intron_boundary
chr5	132477434	132477469	36	-	1000	3.18088	2.71	3.03	Auts2	introns	No_boundary
chr12	89537551	89537731	181	+	1000	3.17479	2.82	3.13	Nrxn3	introns	No_boundary
chr11	81151374	81151522	149	-	1000	3.17431	2.77	3.09	Asic2	introns	Exon_intron_boundary
chr15	28006906	28007042	137	-	1000	3.17431	2.86	3.18	Trio	introns	No_boundary
chr17	27507971	27508063	93	-	1000	3.17431	2.8	3.11	Grm4	introns	No_boundary
chr19	8724022	8724055	34	+	1000	3.17431	2.94	3.27	Snhg1	introns	Exon_intron_boundary
chr9	34785575	34785642	68	+	1000	3.17431	2.79	3.11	Kirrel3	introns	No_boundary
chr11	118884098	118884220	123	-	1000	3.17417	2.89	3.21	Rbfox3	introns	No_boundary
chr2	77669023	77669108	86	-	1000	3.17417	2.94	3.28	Zfp385b	introns	No_boundary
chr14	11730036	11730089	54	+	1000	3.17391	2.91	3.23	Ptprg	introns	No_boundary
chr16	6973122	6973267	146	+	1000	3.17391	2.82	3.13	Rbfox1	introns	No_boundary
chr16	9921817	9921893	77	-	1000	3.17391	2.97	3.3	Grin2a	introns	No_boundary
chr17	8813788	8813917	130	+	1000	3.17391	2.85	3.16	Pde10a	introns	No_boundary
chr19	5834428	5834512	85	-	1000	3.17391	3.07	3.41	Neat1	exons	No_boundary
chr8	14325426	14325470	45	+	1000	3.17391	2.82	3.14	Dlgap2	introns	No_boundary
chr8	120431394	120431532	139	+	1000	3.17391	2.8	3.11	Gse1	introns	No_boundary
chr19	5825848	5825898	51	-	1000	3.16839	2.91	3.24	NA	introns	Exon_intron_boundary
chr6	121072584	121072744	161	-	1000	3.16839	2.93	3.26	Mical3	introns	No_boundary
chr7	45786703	45786776	74	+	1000	3.16839	2.84	3.16	Lmtk3	introns	Exon_intron_boundary
chr8	120537036	120537125	90	+	1000	3.16839	2.75	3.07	Gse1	introns	No_boundary
chr17	27499996	27500111	116	-	1000	3.16595	2.7	3.01	Grm4	introns	No_boundary
chr3	52101115	52101192	78	-	1000	3.16595	2.69	2.99	Maml3	introns	No_boundary
chr4	155193533	155193632	100	-	1000	3.16595	2.83	3.14	Ski	introns	No_boundary
chr9	45538567	45538631	65	+	1000	3.16595	2.76	3.08	Dscaml1	introns	No_boundary
chrX	56789564	56789735	172	+	1000	3.16595	2.86	3.18	Fhl1	introns	Exon_intron_boundary
chr2	25293224	25293324	101	-	1000	3.16517	3.05	3.38	Grin1	introns	No_boundary
chr9	34612219	34612319	101	+	1000	3.16517	2.85	3.16	Kirrel3	introns	No_boundary
chr11	108318002	108318027	26	-	1000	3.16442	2.73	3.04	Prkca	introns	No_boundary
chr11	118772656	118772725	70	-	1000	3.16442	2.96	3.29	Rbfox3	introns	No_boundary
chr17	67348010	67348117	108	-	1000	3.16442	2.92	3.25	Ptprm	introns	No_boundary
chr3	138789850	138789936	87	+	1000	3.16442	2.7	3.01	Tspan5	introns	No_boundary
chr3	153400472	153400600	129	-	1000	3.16442	2.69	3	St6galnac3	introns	No_boundary
chr3	153664981	153665086	106	-	1000	3.16442	2.88	3.2	St6galnac3	introns	No_boundary
chr8	9519895	9519945	51	-	1000	3.16442	2.87	3.19	Nalf1	introns	No_boundary
chr9	28554026	28554146	121	+	1000	3.16442	2.79	3.1	Opcml	introns	No_boundary
chr9	68688159	68688227	69	+	1000	3.16442	2.89	3.21	Rora	introns	No_boundary
chr8	9759497	9759647	151	-	1000	3.15456	3.04	3.37	Nalf1	introns	No_boundary
chr11	108190590	108190640	51	-	1000	3.15108	2.73	3.04	Prkca	introns	No_boundary
chr11	118740630	118740717	88	-	1000	3.15108	2.9	3.22	Rbfox3	introns	No_boundary
chr11	118809979	118810051	73	-	1000	3.15108	3	3.34	Rbfox3	introns	No_boundary
chr8	14556387	14556465	79	+	1000	3.15108	2.71	3.03	Dlgap2	introns	No_boundary
chr9	68763077	68763179	103	+	1000	3.15108	2.82	3.13	Rora	introns	No_boundary
chr9	68954699	68954813	115	+	1000	3.15108	2.75	3.07	Rora	introns	No_boundary
chr1	89479085	89479176	92	+	1000	3.14834	2.97	3.3	Agap1	introns	No_boundary
chr17	8549926	8550015	90	+	1000	3.14834	2.69	3	Pde10a	introns	No_boundary
chr17	8825552	8825683	132	+	1000	3.14834	2.87	3.18	Pde10a	introns	No_boundary
chr4	151712575	151712693	119	-	1000	3.14834	2.72	3.03	Camta1	introns	No_boundary
chrX	103469300	103469363	64	-	1000	3.14756	2.69	3	Xist	exons	Exon_intron_boundary
chr5	132468109	132468167	59	-	1000	3.14711	2.71	3.02	Auts2	introns	No_boundary
chr8	9435061	9435167	107	-	1000	3.14711	2.87	3.19	Nalf1	introns	No_boundary
chr12	88903379	88903477	99	+	1000	3.14673	2.67	2.98	Nrxn3	introns	No_boundary
chr11	76440130	76440204	75	-	1000	3.14465	2.85	3.17	Abr	introns	No_boundary
chr11	108102437	108102508	72	-	1000	3.14465	2.73	3.04	Prkca	introns	No_boundary
chr4	125534460	125534513	54	+	1000	3.14465	2.79	3.11	Grik3	introns	No_boundary
chr5	122000890	122001024	135	-	1000	3.14465	2.76	3.08	Cux2	introns	No_boundary
chr7	49248108	49248157	50	+	1000	3.14465	2.72	3.04	Nav2	introns	No_boundary
chr11	24120291	24120354	64	+	1000	3.14138	2.7	3.01	Bcl11a	introns	No_boundary
chr14	11593231	11593336	106	+	1000	3.14138	2.71	3.03	Ptprg	introns	No_boundary
chr18	79080017	79080112	96	-	1000	3.14138	2.71	3.03	Setbp1	introns	No_boundary
chr3	51995905	51996008	104	-	1000	3.14138	2.84	3.15	Maml3	introns	No_boundary
chr7	49259941	49259989	49	+	1000	3.14138	2.74	3.06	Nav2	introns	No_boundary
chr7	49263385	49263456	72	+	1000	3.14138	2.9	3.23	Nav2	introns	No_boundary
chr8	14533260	14533322	63	+	1000	3.14138	2.79	3.11	Dlgap2	introns	No_boundary
chr1	168278803	168278865	63	-	1000	3.13902	2.8	3.12	Pbx1	introns	No_boundary
chr8	14531332	14531413	82	+	1000	3.13902	2.67	2.98	Dlgap2	introns	Exon_intron_boundary
chr9	34738922	34739093	172	+	1000	3.13902	2.67	2.98	Kirrel3	introns	No_boundary
chr11	5982270	5982379	110	-	1000	3.13325	2.99	3.32	Camk2b	introns	Exon_intron_boundary
chr11	118894846	118894995	150	-	1000	3.13165	2.69	3	Rbfox3	introns	No_boundary
chr8	14318524	14318611	88	+	1000	3.13165	2.84	3.16	Dlgap2	introns	No_boundary
chr11	108304842	108304926	85	-	1000	3.12738	2.71	3.02	Prkca	introns	No_boundary
chr2	179494383	179494519	137	+	1000	3.12738	2.77	3.09	Cdh4	introns	No_boundary
chr5	36366224	36366354	131	-	1000	3.12738	2.9	3.23	Sorcs2	introns	No_boundary
chr8	9466732	9466814	83	-	1000	3.12738	2.83	3.15	Nalf1	introns	No_boundary
chr8	9674139	9674198	60	-	1000	3.12738	2.76	3.07	Nalf1	introns	No_boundary
chr1	168373644	168373780	137	-	1000	3.12272	2.97	3.3	Pbx1	introns	No_boundary
chr3	138797872	138797960	89	+	1000	3.12196	3	3.34	Tspan5	introns	No_boundary
chr5	27260390	27260498	109	+	1000	3.12196	2.75	3.07	Dpp6	introns	No_boundary
chr11	6001399	6001465	67	-	1000	3.11922	2.99	3.33	Camk2b	introns	Exon_intron_boundary
chr5	131762964	131763035	72	-	1000	3.11639	2.69	3	Auts2	introns	No_boundary
chr12	107982320	107982416	97	-	1000	3.11421	2.67	2.98	Bcl11b	introns	No_boundary
chr5	26994933	26995017	85	+	1000	3.11421	2.94	3.27	Dpp6	introns	No_boundary
chr8	120409974	120410104	131	+	1000	3.11421	2.73	3.05	Gse1	introns	No_boundary
chr8	120501379	120501439	61	+	1000	3.11421	2.77	3.09	Gse1	introns	No_boundary
chr9	68850940	68850995	56	+	1000	3.11421	2.7	3.02	Rora	introns	No_boundary
chr4	151772439	151772483	45	-	1000	3.11386	2.67	2.98	Camta1	introns	No_boundary
chr8	58876636	58876798	163	-	1000	3.11386	2.66	2.97	Galntl6	introns	No_boundary
chr9	66174276	66174353	78	+	1000	3.11386	2.86	3.17	Dapk2	introns	No_boundary
chr17	27501416	27501516	101	-	1000	3.10588	2.84	3.16	Grm4	introns	No_boundary
chr3	37481702	37481775	74	+	1000	3.10454	2.92	3.24	Spata5	introns	No_boundary
chr7	44341153	44341257	105	+	1000	3.10454	2.96	3.29	Shank1	introns	No_boundary
chr8	9479682	9479798	117	-	1000	3.10454	2.79	3.11	Nalf1	introns	No_boundary
chr8	9620755	9620841	87	-	1000	3.10454	2.89	3.21	Nalf1	introns	No_boundary
chr9	45463821	45463951	131	+	1000	3.10454	2.75	3.07	Dscaml1	introns	No_boundary
chr12	111790075	111790201	127	+	1000	3.09992	2.76	3.08	Klc1	introns	No_boundary
chr1	168323965	168324055	91	-	1000	3.09788	3.08	3.42	Pbx1	introns	No_boundary
chr5	131768908	131769005	98	-	1000	3.09788	2.99	3.33	Auts2	introns	No_boundary
chr9	45461289	45461372	84	+	1000	3.09788	2.88	3.2	Dscaml1	introns	No_boundary
chr5	132382929	132383016	88	-	1000	3.09501	2.84	3.15	Auts2	introns	No_boundary
chr6	37297799	37297904	106	-	1000	3.09501	2.77	3.09	Dgki	introns	No_boundary
chr9	34494253	34494315	63	+	1000	3.09501	2.97	3.29	Kirrel3	introns	No_boundary
chr17	8527679	8527754	76	+	1000	3.09439	2.96	3.29	Pde10a	introns	No_boundary
chr2	179493258	179493348	91	+	1000	3.09439	2.69	3	Cdh4	introns	No_boundary
chr7	68007107	68007213	107	+	1000	3.09439	3.02	3.36	Igf1r	introns	No_boundary
chr9	68805654	68805734	81	+	1000	3.09439	2.92	3.25	Rora	introns	No_boundary
chr5	132181859	132181986	128	-	1000	3.09398	2.72	3.03	Auts2	introns	No_boundary
chr8	9763413	9763532	120	-	1000	3.09398	2.97	3.3	Nalf1	introns	No_boundary
chr9	34545538	34545690	153	+	1000	3.09398	3	3.34	Kirrel3	introns	No_boundary
chr5	27078774	27078870	97	+	1000	3.09382	2.71	3.03	Dpp6	introns	No_boundary
chr5	132369801	132369880	80	-	1000	3.09382	2.87	3.19	Auts2	introns	No_boundary
chr5	132479453	132479522	70	-	1000	3.09382	2.97	3.3	Auts2	introns	No_boundary
chr9	45468088	45468160	73	+	1000	3.09382	2.91	3.24	Dscaml1	introns	No_boundary
chr11	3500149	3500298	150	-	1000	3.09287	2.94	3.27	Inpp5j	cds	Exon_intron_boundary
chr11	108319293	108319381	89	-	1000	3.09085	2.92	3.25	Prkca	introns	No_boundary
chr8	9657110	9657203	94	-	1000	3.09085	2.73	3.04	Nalf1	introns	No_boundary
chr3	138787084	138787198	115	+	1000	3.08816	2.84	3.16	Tspan5	introns	No_boundary
chr4	151769838	151769932	95	-	1000	3.08816	2.75	3.07	Camta1	introns	No_boundary
chr5	131764098	131764203	106	-	1000	3.088	2.69	3	Auts2	introns	No_boundary
chr5	132195315	132195420	106	-	1000	3.08486	2.79	3.11	Auts2	introns	No_boundary
chr17	27490110	27490200	91	-	1000	3.08471	2.99	3.33	Grm4	introns	No_boundary
chr19	32210574	32210798	225	-	1000	3.08471	2.92	3.25	Sgms1	introns	No_boundary
chr6	37281720	37281802	83	-	1000	3.08471	2.83	3.14	Dgki	introns	No_boundary
chr9	45452211	45452316	106	+	1000	3.08471	2.86	3.17	Dscaml1	introns	No_boundary
chr14	11788760	11788965	206	+	1000	3.08415	2.87	3.19	Ptprg	introns	No_boundary
chr16	22224278	22224342	65	+	1000	3.08415	2.69	3	NA	exons	Exon_intron_boundary
chr16	9839387	9839475	89	-	1000	3.08415	2.71	3.03	Grin2a	introns	No_boundary
chr2	6935131	6935216	86	-	1000	3.08415	2.7	3.01	Celf2	introns	No_boundary
chr8	120356125	120356238	114	+	1000	3.08415	2.74	3.06	Gse1	introns	No_boundary
chr17	27484994	27485128	135	-	1000	3.08148	2.65	2.96	Grm4	introns	No_boundary
chr17	86234562	86234759	198	+	1000	3.0751	2.74	3.05	Prkce	introns	No_boundary
chr4	155216625	155216694	70	-	1000	3.0751	2.84	3.15	Ski	introns	No_boundary
chr7	49247588	49247653	66	+	1000	3.0751	2.88	3.2	Nav2	introns	No_boundary
chr8	14393227	14393346	120	+	1000	3.0751	2.79	3.1	Dlgap2	introns	No_boundary
chr9	68756611	68756686	76	+	1000	3.0751	2.67	2.98	Rora	introns	No_boundary
chr11	81585062	81585173	112	-	1000	3.07262	2.82	3.13	Asic2	introns	No_boundary
chr5	132444830	132444952	123	-	1000	3.07236	2.82	3.14	Auts2	introns	No_boundary
chr5	27050736	27050878	143	+	1000	3.07109	2.93	3.26	Dpp6	introns	No_boundary
chr9	34492530	34492635	106	+	1000	3.07109	2.93	3.27	Kirrel3	introns	No_boundary
chr9	34600549	34600645	97	+	1000	3.07025	2.83	3.14	Kirrel3	introns	No_boundary
chr1	168356791	168356838	48	-	1000	3.067	2.75	3.06	Pbx1	introns	No_boundary
chr15	74550104	74550188	85	+	1000	3.067	2.8	3.11	Adgrb1	introns	Exon_intron_boundary
chr9	34490776	34490815	40	+	1000	3.06579	2.89	3.22	Kirrel3	introns	No_boundary
chr11	108338791	108338919	129	-	1000	3.06556	2.9	3.22	Prkca	introns	No_boundary
chr5	132537737	132537809	73	-	1000	3.06556	2.64	2.95	Auts2	introns	No_boundary
chr5	26942571	26942705	135	+	1000	3.06008	2.9	3.22	Dpp6	introns	No_boundary
chr16	28291053	28291237	185	-	1000	3.05749	2.85	3.16	Fgf12	introns	No_boundary
chr2	25293540	25293633	94	-	1000	3.05249	2.65	2.96	Grin1	introns	No_boundary
chr9	34750106	34750214	109	+	1000	3.05249	2.7	3.01	Kirrel3	introns	No_boundary
chr1	168364010	168364193	184	-	1000	3.05059	2.82	3.13	Pbx1	introns	No_boundary
chr2	26912844	26912912	69	+	1000	3.05059	2.91	3.24	Rpl7a	introns	Exon_intron_boundary
chr12	89853444	89853547	104	+	1000	3.0505	2.69	3	Nrxn3	introns	No_boundary
chr5	26906385	26906472	88	+	1000	3.0505	2.86	3.18	Dpp6	introns	No_boundary
chr5	27130814	27130924	111	+	1000	3.0505	2.65	2.95	Dpp6	introns	No_boundary
chr9	68931046	68931185	140	+	1000	3.0505	2.85	3.17	Rora	introns	No_boundary
chr17	13590718	13590785	68	-	1000	3.04711	2.72	3.03	2700054A10Rik	introns	No_boundary
chr2	77615998	77616074	77	-	1000	3.04711	2.92	3.24	Zfp385b	introns	No_boundary
chr5	131704273	131704321	49	-	1000	3.04711	2.79	3.11	Auts2	introns	No_boundary
chr9	45508757	45508825	69	+	1000	3.04711	2.85	3.17	Dscaml1	introns	No_boundary
chr9	68926001	68926114	114	+	1000	3.04711	2.97	3.3	Rora	introns	No_boundary
chr1	168413260	168413329	70	-	1000	3.04366	2.73	3.05	Pbx1	introns	No_boundary
chr10	13969083	13969212	130	+	1000	3.0432	2.7	3.01	Hivep2	introns	No_boundary
chr12	88958330	88958432	103	+	1000	3.04121	2.7	3.01	Nrxn3	introns	No_boundary
chr18	84053778	84053886	109	-	1000	3.04121	2.7	3.01	Tshz1	introns	No_boundary
chr9	45479791	45480023	233	+	1000	3.04087	2.69	3	Dscaml1	introns	No_boundary
chr17	8804881	8804931	51	+	1000	3.04074	2.65	2.96	Pde10a	introns	No_boundary
chr9	45583183	45583226	44	+	1000	3.04074	2.71	3.02	Dscaml1	introns	No_boundary
chr11	118570932	118571034	103	-	1000	3.04055	2.71	3.03	Rbfox3	introns	No_boundary
chr2	162578514	162578632	119	-	1000	3.04055	2.84	3.15	Ptprt	introns	No_boundary
chr9	68852899	68852968	70	+	1000	3.04055	2.77	3.09	Rora	introns	No_boundary
chr1	168306399	168306553	155	-	1000	3.04025	2.96	3.29	Pbx1	introns	No_boundary
chr1	168329148	168329282	135	-	1000	3.03941	2.87	3.19	Pbx1	introns	No_boundary
chr5	27176609	27176707	99	+	1000	3.03172	2.88	3.2	Dpp6	introns	No_boundary
chr1	168421566	168421608	43	-	1000	3.03138	3.01	3.35	Pbx1	introns	No_boundary
chr1	168361104	168361153	50	-	1000	3.03051	2.99	3.32	Pbx1	introns	No_boundary
chr5	131717631	131717719	89	-	1000	3.03051	2.67	2.98	Auts2	introns	No_boundary
chr9	34541518	34541593	76	+	1000	3.03051	2.67	2.98	Kirrel3	introns	No_boundary
chr17	86244271	86244395	125	+	1000	3.0295	2.85	3.17	Prkce	introns	No_boundary
chr9	45538978	45539063	86	+	1000	3.0295	3.03	3.37	Dscaml1	introns	No_boundary
chr11	118787196	118787342	147	-	1000	3.02883	2.84	3.16	Rbfox3	introns	No_boundary
chr5	26887723	26887832	110	+	1000	3.02883	2.78	3.1	Dpp6	introns	No_boundary
chr9	34604434	34604506	73	+	1000	3.02883	2.68	2.99	Kirrel3	introns	No_boundary
chr9	45451570	45451702	133	+	1000	3.02883	2.67	2.98	Dscaml1	introns	No_boundary
chr9	29311956	29312084	129	-	1000	3.02883	2.75	3.06	Ntm	introns	No_boundary
chr5	27018705	27018776	72	+	1000	3.02705	2.72	3.03	Dpp6	introns	No_boundary
chr6	91726798	91726972	175	+	1000	3.02705	2.7	3.01	Slc6a6	introns	No_boundary
chr17	13654970	13655080	111	-	1000	3.02501	2.66	2.97	2700054A10Rik	introns	No_boundary
chr9	34495814	34495950	137	+	1000	3.02332	2.93	3.25	Kirrel3	introns	No_boundary
chr5	27137061	27137172	112	+	1000	3.02267	2.83	3.14	Dpp6	introns	No_boundary
chr5	132242462	132242574	113	-	1000	3.02267	2.75	3.07	Auts2	introns	No_boundary
chr8	9486578	9486698	121	-	1000	3.02267	2.77	3.09	Nalf1	introns	No_boundary
chr11	77467870	77467961	92	+	1000	3.02248	2.9	3.22	Coro6	introns	Exon_intron_boundary
chr11	118893775	118893905	131	-	1000	3.02248	2.78	3.1	Rbfox3	introns	No_boundary
chr12	88979481	88979522	42	+	1000	3.02248	2.69	3	Nrxn3	introns	No_boundary
chr1	168277150	168277257	108	-	1000	3.0214	2.87	3.19	Pbx1	introns	No_boundary
chr9	34728836	34728898	63	+	1000	3.0214	2.85	3.17	Kirrel3	introns	No_boundary
chr5	132243391	132243500	110	-	1000	3.02077	2.89	3.21	Auts2	introns	No_boundary
chr3	156694050	156694124	75	+	1000	3.01928	2.76	3.08	Negr1	introns	No_boundary
chr9	45473551	45473599	49	+	1000	3.01928	2.8	3.12	Dscaml1	introns	No_boundary
chr9	45554389	45554495	107	+	1000	3.01787	2.9	3.23	Dscaml1	introns	No_boundary
chr9	45480899	45481032	134	+	1000	3.0137	2.78	3.1	Dscaml1	introns	No_boundary
chr1	168359835	168359955	121	-	1000	3.01212	3.05	3.39	Pbx1	introns	No_boundary
chr11	81735887	81735935	49	-	1000	3.01003	2.7	3.01	Asic2	introns	No_boundary
chr7	144318096	144318200	105	+	1000	3.01003	2.72	3.03	Shank2	introns	No_boundary
chr2	181080336	181080475	140	-	1000	3.00677	2.66	2.97	Kcnq2	3UTRs	No_boundary
chr9	34612944	34613006	63	+	1000	3.00677	2.71	3.02	Kirrel3	introns	No_boundary
chr1	89522822	89522895	74	+	1000	3.00419	2.82	3.13	Agap1	introns	No_boundary
chr15	30184981	30185032	52	+	1000	3.00419	2.72	3.04	Ctnnd2	introns	No_boundary
chr18	75001049	75001121	73	+	1000	3.00419	2.75	3.07	Rpl17	introns	Exon_intron_boundary
chr3	153680290	153680356	67	-	1000	3.00419	2.88	3.2	St6galnac3	introns	No_boundary
chr5	36385161	36385240	80	-	1000	3.00419	2.93	3.26	Sorcs2	introns	No_boundary
chr8	117258373	117258474	102	+	1000	3.00419	2.88	3.2	Cmip	introns	No_boundary
chr8	120439651	120439724	74	+	1000	3.00419	2.64	2.95	Gse1	introns	No_boundary
chr5	132486177	132486260	84	-	1000	3.00356	2.75	3.06	Auts2	introns	No_boundary
chr9	34708656	34708703	48	+	1000	3.00192	2.67	2.98	Kirrel3	introns	No_boundary
chr5	132535204	132535289	86	-	1000	3.00166	2.73	3.04	Auts2	introns	No_boundary
chr13	45940913	45941059	147	-	1000	2.99978	2.94	3.27	Atxn1	introns	No_boundary
chr5	132189629	132189703	75	-	1000	2.99978	2.98	3.31	Auts2	introns	No_boundary
chr7	45797942	45798099	158	+	1000	2.99978	2.66	2.97	Lmtk3	introns	Exon_intron_boundary
chr9	34731140	34731182	43	+	1000	2.99978	2.68	2.99	Kirrel3	introns	No_boundary
chr7	45126603	45126660	58	-	1000	2.99866	2.97	3.3	Rpl13a	introns	Exon_intron_boundary
chr9	45467211	45467316	106	+	1000	2.99866	2.92	3.24	Dscaml1	introns	No_boundary
chr10	62765575	62765641	67	-	1000	2.99273	2.85	3.17	Ccar1	introns	Exon_intron_boundary
chr12	88955375	88955452	78	+	1000	2.98987	2.71	3.02	Nrxn3	introns	No_boundary
chr2	77617963	77618097	135	-	1000	2.98983	2.81	3.12	Zfp385b	introns	No_boundary
chr9	34489680	34489793	114	+	1000	2.98843	2.86	3.18	Kirrel3	introns	No_boundary
chr11	119967708	119967865	158	+	1000	2.98418	2.66	2.97	Baiap2	introns	No_boundary
chr11	88648423	88648502	80	-	1000	2.98418	2.69	3	Msi2	introns	No_boundary
chr11	118882524	118882604	81	-	1000	2.98418	2.86	3.18	Rbfox3	introns	No_boundary
chr19	6342920	6343031	112	+	1000	2.98418	2.87	3.18	Map4k2	introns	Exon_intron_boundary
chr3	103592445	103592528	84	+	1000	2.98418	2.77	3.08	Syt6	introns	No_boundary
chr5	36392734	36392825	92	-	1000	2.98418	2.69	3	Sorcs2	introns	No_boundary
chr6	114015561	114015657	97	-	1000	2.98418	2.7	3.01	Atp2b2	introns	No_boundary
chr8	14381714	14381790	77	+	1000	2.98418	2.62	2.92	Dlgap2	introns	No_boundary
chr1	168336356	168336383	28	-	1000	2.97745	2.92	3.25	Pbx1	introns	No_boundary
chr8	9610965	9611042	78	-	1000	2.97745	2.65	2.96	Nalf1	introns	No_boundary
chr11	118758225	118758288	64	-	1000	2.97699	2.65	2.96	Rbfox3	introns	No_boundary
chr14	11597202	11597315	114	+	1000	2.97699	2.64	2.95	Ptprg	introns	No_boundary
chr9	34735409	34735484	76	+	1000	2.97699	2.66	2.97	Kirrel3	introns	No_boundary
chr1	168394024	168394093	70	-	1000	2.97679	2.89	3.21	Pbx1	introns	No_boundary
chr5	132393924	132393977	54	-	1000	2.97551	2.83	3.14	Auts2	introns	No_boundary
chr8	14531624	14531697	74	+	1000	2.97551	2.68	2.99	Dlgap2	introns	No_boundary
chr8	120385810	120385971	162	+	1000	2.97551	2.92	3.25	Gse1	introns	No_boundary
chr9	45583468	45583629	162	+	1000	2.97551	2.76	3.08	Dscaml1	introns	No_boundary
chr9	68931740	68931849	110	+	1000	2.97551	2.84	3.16	Rora	introns	No_boundary
chr1	168396767	168396861	95	-	1000	2.97179	2.93	3.26	Pbx1	introns	No_boundary
chr11	108269453	108269574	122	-	1000	2.97171	2.9	3.23	Prkca	introns	No_boundary
chr2	179455321	179455447	127	+	1000	2.97171	2.99	3.33	Cdh4	introns	No_boundary
chr3	156667214	156667315	102	+	1000	2.97171	2.61	2.92	Negr1	introns	No_boundary
chr5	131896812	131896966	155	-	1000	2.97171	2.85	3.17	Auts2	introns	No_boundary
chr9	34730614	34730698	85	+	1000	2.97171	2.75	3.07	Kirrel3	introns	No_boundary
chr19	5843244	5843392	149	-	1000	2.97155	2.99	3.32	Neat1	exons	No_boundary
chr7	44336895	44336995	101	+	1000	2.97155	2.88	3.21	Shank1	introns	No_boundary
chr9	78479112	78479190	79	-	1000	2.97155	2.62	2.93	Eef1a1	cds	Exon_intron_boundary
chr4	155221293	155221417	125	-	1000	2.96904	2.72	3.04	Ski	introns	Exon_intron_boundary
chr9	34660384	34660533	150	+	1000	2.96904	2.74	3.05	Kirrel3	introns	No_boundary
chr1	168337582	168337685	104	-	1000	2.96851	2.92	3.25	Pbx1	introns	No_boundary
chr5	27080702	27080748	47	+	1000	2.96762	2.65	2.96	Dpp6	introns	No_boundary
chr7	49266811	49266896	86	+	1000	2.96762	2.81	3.13	Nav2	introns	No_boundary
chr8	14473154	14473302	149	+	1000	2.96762	2.73	3.04	Dlgap2	introns	No_boundary
chr9	45529326	45529480	155	+	1000	2.96762	2.68	2.99	Dscaml1	introns	No_boundary
chr1	168304254	168304352	99	-	1000	2.9671	2.97	3.29	Pbx1	introns	No_boundary
chr11	118907693	118907794	102	-	1000	2.96397	2.9	3.22	Rbfox3	introns	No_boundary
chr9	45499959	45500068	110	+	1000	2.96397	2.93	3.26	Dscaml1	introns	No_boundary
chr12	88876170	88876216	47	+	1000	2.96393	2.87	3.19	Nrxn3	introns	No_boundary
chr11	35259926	35260110	185	+	1000	2.96329	2.75	3.06	Slit3	introns	No_boundary
chr17	8554237	8554374	138	+	1000	2.96329	2.7	3.01	Pde10a	introns	No_boundary
chr18	79056114	79056262	149	-	1000	2.96329	2.71	3.02	Setbp1	introns	No_boundary
chr3	138796920	138797009	90	+	1000	2.96329	2.63	2.94	Tspan5	introns	No_boundary
chr4	78156592	78156701	110	-	1000	2.96329	2.61	2.91	Ptprd	introns	No_boundary
chr4	155212459	155212546	88	-	1000	2.96329	2.85	3.17	Ski	introns	No_boundary
chr5	36364536	36364618	83	-	1000	2.96329	2.76	3.08	Sorcs2	introns	No_boundary
chr9	34785456	34785574	119	+	1000	2.96329	2.8	3.12	Kirrel3	introns	No_boundary
chr18	25667325	25667481	157	-	1000	2.96321	2.81	3.12	Celf4	introns	No_boundary
chr17	39845971	39846001	31	+	1000	2.96027	3.06	3.39	Rn45s	exons	Exon_intron_boundary
chr18	25628032	25628193	162	-	1000	2.95904	2.76	3.07	Celf4	introns	No_boundary
chr5	27173509	27173587	79	+	1000	2.95904	2.67	2.98	Dpp6	introns	No_boundary
chr9	34703009	34703093	85	+	1000	2.95904	2.9	3.22	Kirrel3	introns	No_boundary
chr10	81461905	81462006	102	-	1000	2.95794	2.66	2.97	Celf5	3UTRs	Intron_exon_boundary
chr12	88917573	88917682	110	+	1000	2.95711	2.76	3.08	Nrxn3	introns	No_boundary
chr2	77689910	77689993	84	-	1000	2.95711	2.7	3.01	Zfp385b	introns	No_boundary
chr18	25657024	25657128	105	-	1000	2.95476	2.68	2.99	Celf4	introns	No_boundary
chr12	88922974	88923023	50	+	1000	2.95448	2.85	3.17	Nrxn3	introns	No_boundary
chr16	9922875	9923005	131	-	1000	2.95448	2.76	3.07	Grin2a	introns	No_boundary
chr18	25641509	25641572	64	-	1000	2.95448	2.62	2.93	Celf4	introns	No_boundary
chr16	12010903	12011028	126	+	1000	2.93953	2.78	3.1	Shisa9	introns	No_boundary
chr19	10432785	10432943	159	+	1000	2.93953	2.83	3.14	Syt7	introns	No_boundary
chr2	115983772	115983842	71	-	1000	2.93953	2.8	3.12	Meis2	introns	No_boundary
chr9	34503102	34503197	96	+	1000	2.93953	2.87	3.19	Kirrel3	introns	No_boundary
chr11	88469214	88469287	74	-	1000	2.93881	2.76	3.07	Msi2	introns	No_boundary
chr12	107952647	107952715	69	-	1000	2.93881	2.6	2.91	Bcl11b	introns	No_boundary
chr15	87654869	87654991	123	+	1000	2.93881	2.62	2.93	Tafa5	introns	No_boundary
chr7	49313591	49313655	65	+	1000	2.93881	2.69	3	Nav2	introns	No_boundary
chr9	34760785	34760866	82	+	1000	2.93881	2.78	3.1	Kirrel3	introns	No_boundary
chr1	15318949	15319039	91	+	1000	2.93802	2.67	2.98	Kcnb2	introns	No_boundary
chr18	74044255	74044372	118	-	1000	2.93772	2.66	2.97	Mapk4	introns	No_boundary
chr11	81643495	81643580	86	-	1000	2.93215	2.6	2.9	Asic2	introns	No_boundary
chr11	81897708	81897811	104	-	1000	2.93215	2.75	3.06	Asic2	introns	No_boundary
chr13	12038747	12038835	89	-	1000	2.93215	2.6	2.9	Ryr2	introns	No_boundary
chr4	125529350	125529412	63	+	1000	2.93215	2.72	3.04	Grik3	introns	No_boundary
chr5	36882212	36882283	72	+	1000	2.93215	2.68	2.99	Ppp2r2c	introns	No_boundary
chr8	14386844	14386896	53	+	1000	2.93215	2.7	3.01	Dlgap2	introns	No_boundary
chr8	14576289	14576372	84	+	1000	2.93215	2.88	3.2	Dlgap2	introns	No_boundary
chr17	23816362	23816482	121	+	1000	2.93107	2.87	3.18	Srrm2	cds	No_boundary
chr8	9471206	9471319	114	-	1000	2.92981	2.64	2.95	Nalf1	introns	No_boundary
chr17	70192717	70192820	104	+	1000	2.92209	2.77	3.08	Dlgap1	introns	No_boundary
chr5	27091417	27091506	90	+	1000	2.92209	2.63	2.94	Dpp6	introns	No_boundary
chr7	79526651	79526718	68	+	1000	2.92209	2.65	2.96	Mir9-3hg	introns	No_boundary
chr9	34749802	34749890	89	+	1000	2.92209	2.74	3.06	Kirrel3	introns	No_boundary
chr11	118570068	118570139	72	-	1000	2.92184	2.8	3.12	Rbfox3	introns	No_boundary
chr11	118763229	118763286	58	-	1000	2.92184	2.74	3.05	Rbfox3	introns	No_boundary
chr4	156165379	156165461	83	-	1000	2.92184	2.62	2.93	Agrn	3UTRs	No_boundary
chr8	120495827	120495925	99	+	1000	2.92184	2.6	2.9	Gse1	introns	No_boundary
chr9	41112594	41112683	90	-	1000	2.92184	2.82	3.13	Ubash3b	introns	No_boundary
chr1	92135801	92135913	113	-	1000	2.92125	2.78	3.1	Hdac4	introns	No_boundary
chr11	88670215	88670322	108	-	1000	2.92125	2.62	2.93	Msi2	introns	No_boundary
chr7	46420213	46420294	82	+	1000	2.92125	2.69	3	Kcnc1	introns	No_boundary
chr7	49249648	49249721	74	+	1000	2.92125	2.86	3.18	Nav2	introns	No_boundary
chr9	34600750	34600816	67	+	1000	2.92125	2.71	3.02	Kirrel3	introns	No_boundary
chr5	131702651	131702729	79	-	1000	2.92049	2.61	2.92	Auts2	introns	No_boundary
chr9	34574918	34574989	72	+	1000	2.92049	2.72	3.03	Kirrel3	introns	No_boundary
chr10	69690826	69690959	134	+	1000	2.91804	2.78	3.1	Ank3	introns	No_boundary
chr2	77606783	77606867	85	-	1000	2.91804	2.85	3.16	Zfp385b	introns	No_boundary
chr5	36378422	36378525	104	-	1000	2.91804	2.94	3.27	Sorcs2	introns	No_boundary
chr7	49415678	49415772	95	+	1000	2.91804	2.63	2.94	Nav2	introns	No_boundary
chr8	14592630	14592735	106	+	1000	2.91804	2.86	3.18	Dlgap2	introns	No_boundary
chr18	25663745	25663878	134	-	1000	2.91589	2.85	3.16	Celf4	introns	No_boundary
chr8	9728454	9728560	107	-	1000	2.91503	2.8	3.11	Nalf1	introns	No_boundary
chr11	81846141	81846252	112	-	1000	2.91496	2.82	3.13	Asic2	introns	No_boundary
chr5	132030096	132030156	61	-	1000	2.91496	2.61	2.92	Auts2	introns	No_boundary
chr5	132431988	132432038	51	-	1000	2.91496	2.73	3.04	Auts2	introns	No_boundary
chr12	88963991	88964061	71	+	1000	2.91428	2.85	3.16	Nrxn3	introns	No_boundary
chr9	34721296	34721395	100	+	1000	2.91428	2.72	3.04	Kirrel3	introns	No_boundary
chr1	15321412	15321520	109	+	1000	2.91336	2.71	3.03	Kcnb2	introns	No_boundary
chr18	25655635	25655765	131	-	1000	2.91318	2.78	3.09	Celf4	introns	No_boundary
chr2	167184348	167184413	66	-	1000	2.90897	2.63	2.94	Kcnb1	introns	No_boundary
chr5	36309959	36310064	106	-	1000	2.90897	2.64	2.95	Sorcs2	introns	No_boundary
chr9	103569409	103569506	98	-	1000	2.90897	2.64	2.94	Tmem108	introns	No_boundary
chr11	118799958	118800006	49	-	1000	2.90788	2.66	2.97	Rbfox3	introns	No_boundary
chr12	107963798	107963890	93	-	1000	2.90788	2.71	3.02	Bcl11b	introns	No_boundary
chr16	7051364	7051455	92	+	1000	2.90788	2.74	3.05	Rbfox1	introns	No_boundary
chr6	112938006	112938121	116	-	1000	2.90788	2.76	3.08	Srgap3	introns	No_boundary
chr8	120359500	120359637	138	+	1000	2.90788	2.63	2.94	Gse1	introns	No_boundary
chr7	44334442	44334543	102	+	1000	2.90431	2.84	3.15	Shank1	introns	Exon_intron_boundary
chr8	9689968	9690148	181	-	1000	2.90431	2.74	3.06	Nalf1	introns	No_boundary
chr2	134989869	134990013	145	+	1000	2.89922	2.65	2.95	Plcb1	introns	No_boundary
chr5	131989564	131989678	115	-	1000	2.89729	2.9	3.22	Auts2	introns	No_boundary
chr5	132256435	132256535	101	-	1000	2.89562	2.65	2.95	Auts2	introns	No_boundary
chr10	13990841	13990878	38	+	1000	2.89265	2.62	2.93	Hivep2	introns	No_boundary
chr11	24154105	24154158	54	+	1000	2.89265	2.67	2.98	Bcl11a	introns	No_boundary
chr11	78183062	78183098	37	-	1000	2.89265	2.92	3.25	Rpl23a	introns	Exon_intron_boundary
chr11	118767657	118767723	67	-	1000	2.89265	2.73	3.04	Rbfox3	introns	No_boundary
chr2	52586591	52586713	123	-	1000	2.89265	2.65	2.96	Cacnb4	introns	No_boundary
chr3	153354701	153354777	77	-	1000	2.89265	2.67	2.98	St6galnac3	introns	No_boundary
chr5	132138188	132138285	98	-	1000	2.89093	2.61	2.92	Auts2	introns	No_boundary
chr9	68896629	68896786	158	+	1000	2.89093	2.6	2.91	Rora	introns	No_boundary
chr17	70119335	70119418	84	+	1000	2.89062	2.63	2.94	Dlgap1	introns	No_boundary
chr17	27477947	27478041	95	-	1000	2.89062	2.83	3.14	Grm4	introns	No_boundary
chr18	74014656	74014777	122	-	1000	2.89062	2.6	2.91	Mapk4	introns	No_boundary
chr9	34702766	34702833	68	+	1000	2.89062	2.91	3.24	Kirrel3	introns	No_boundary
chr9	68893333	68893430	98	+	1000	2.89062	2.77	3.09	Rora	introns	No_boundary
chr5	132536606	132536699	94	-	1000	2.89039	2.78	3.1	Auts2	introns	No_boundary
chr11	87337377	87337534	158	-	1000	2.89032	2.96	3.29	Ppm1e	introns	No_boundary
chr5	27177039	27177122	84	+	1000	2.88988	2.77	3.09	Dpp6	introns	No_boundary
chr5	131704751	131704850	100	-	1000	2.88988	2.68	2.99	Auts2	introns	No_boundary
chr5	132230135	132230217	83	-	1000	2.88988	2.87	3.19	Auts2	introns	No_boundary
chr17	70086519	70086625	107	+	1000	2.88948	2.65	2.96	Dlgap1	introns	No_boundary
chr4	155198867	155198957	91	-	1000	2.88948	2.76	3.08	Ski	introns	No_boundary
chr5	132186294	132186384	91	-	1000	2.88948	2.59	2.89	Auts2	introns	No_boundary
chr9	34497384	34497461	78	+	1000	2.88813	2.9	3.22	Kirrel3	introns	No_boundary
chr9	34618989	34619058	70	+	1000	2.88813	2.57	2.88	Kirrel3	introns	No_boundary
chr5	27118139	27118237	99	+	1000	2.88739	2.84	3.15	Dpp6	introns	No_boundary
chr12	67219741	67219877	137	-	1000	2.88147	2.68	2.99	Mdga2	introns	No_boundary
chr4	125498642	125498782	141	+	1000	2.88147	2.75	3.06	Grik3	introns	No_boundary
chr4	125511769	125511860	92	+	1000	2.88147	2.8	3.12	Grik3	introns	No_boundary
chr6	137256179	137256279	101	+	1000	2.88147	2.62	2.92	Ptpro	introns	No_boundary
chr9	34594259	34594349	91	+	1000	2.88147	2.71	3.03	Kirrel3	introns	No_boundary
chr9	45459979	45460040	62	+	1000	2.88147	2.61	2.91	Dscaml1	introns	No_boundary
chr12	88857827	88857881	55	+	1000	2.87238	2.63	2.94	Nrxn3	introns	No_boundary
chr5	131729808	131729907	100	-	1000	2.87238	2.69	2.99	Auts2	introns	No_boundary
chr5	132458935	132459015	81	-	1000	2.87209	2.61	2.92	Auts2	introns	No_boundary
chr11	88687646	88687710	65	-	1000	2.87095	2.62	2.93	Msi2	introns	No_boundary
chr11	88689423	88689529	107	-	1000	2.87095	2.7	3.01	Msi2	introns	No_boundary
chr11	108149102	108149186	85	-	1000	2.87095	2.72	3.03	Prkca	introns	No_boundary
chr18	25641750	25641832	83	-	1000	2.87095	2.84	3.16	Celf4	introns	No_boundary
chr2	115969293	115969445	153	-	1000	2.87095	2.87	3.19	Meis2	introns	No_boundary
chr4	151759405	151759533	129	-	1000	2.87095	2.65	2.96	Camta1	introns	No_boundary
chr8	120490731	120490837	107	+	1000	2.87095	2.86	3.17	Gse1	introns	No_boundary
chr9	34658344	34658419	76	+	1000	2.87095	2.86	3.17	Kirrel3	introns	No_boundary
chr9	68804418	68804537	120	+	1000	2.86796	2.77	3.08	Rora	introns	No_boundary
chr14	55511022	55511299	278	+	1000	2.86748	2.9	3.23	Cpne6	introns	Exon_intron_boundary
chr1	168391076	168391177	102	-	1000	2.86675	2.94	3.27	Pbx1	introns	No_boundary
chr10	108801398	108801598	201	-	1000	2.86468	2.63	2.94	Syt1	introns	No_boundary
chr18	84060389	84060478	90	-	1000	2.86468	2.59	2.9	Tshz1	introns	No_boundary
chr2	156520457	156520586	130	+	1000	2.86468	2.76	3.08	Epb41l1	introns	No_boundary
chr5	27047508	27047612	105	+	1000	2.86468	2.78	3.1	Dpp6	introns	No_boundary
chr9	34518540	34518634	95	+	1000	2.86468	2.66	2.97	Kirrel3	introns	No_boundary
chr9	34646351	34646526	176	+	1000	2.86468	2.94	3.27	Kirrel3	introns	No_boundary
chr12	88876487	88876570	84	+	1000	2.86445	2.89	3.21	Nrxn3	introns	No_boundary
chr11	33840793	33840917	125	-	1000	2.86309	2.61	2.92	Kcnip1	introns	No_boundary
chr12	3817277	3817355	79	+	1000	2.86309	2.63	2.94	Dnmt3a	introns	No_boundary
chr18	25608365	25608508	144	-	1000	2.86309	2.72	3.04	Celf4	introns	No_boundary
chr4	76502798	76502918	121	-	1000	2.86309	2.7	3.01	Ptprd	introns	No_boundary
chr7	49251332	49251397	66	+	1000	2.86309	2.77	3.09	Nav2	introns	No_boundary
chr8	93816625	93816740	116	+	1000	2.86309	2.6	2.91	Gnao1	introns	No_boundary
chr8	9471827	9471892	66	-	1000	2.86309	2.59	2.9	Nalf1	introns	No_boundary
chr9	34760389	34760501	113	+	1000	2.86309	2.64	2.94	Kirrel3	introns	No_boundary
chr1	168318969	168319050	82	-	1000	2.86176	2.98	3.31	Pbx1	introns	No_boundary
chr11	118535784	118535841	58	-	1000	2.8614	2.7	3.01	Rbfox3	introns	No_boundary
chr11	118546817	118546868	52	-	1000	2.8614	2.62	2.93	Rbfox3	introns	No_boundary
chr17	86271683	86271759	77	+	1000	2.8614	2.84	3.15	Prkce	introns	No_boundary
chr18	78985940	78986051	112	-	1000	2.8614	2.73	3.05	Setbp1	introns	No_boundary
chr2	179632000	179632064	65	+	1000	2.8614	2.71	3.02	Cdh4	introns	No_boundary
chr2	162567327	162567382	56	-	1000	2.8614	2.67	2.98	Ptprt	introns	No_boundary
chr3	153714359	153714411	53	-	1000	2.8614	2.57	2.88	St6galnac3	introns	No_boundary
chr7	44249886	44249925	40	+	1000	2.8614	2.84	3.16	2410002F23Rik	introns	Exon_intron_boundary
chr8	14427697	14427767	71	+	1000	2.8614	2.7	3.01	Dlgap2	introns	No_boundary
chr8	120406670	120406772	103	+	1000	2.8614	2.76	3.08	Gse1	introns	No_boundary
chr16	28288125	28288230	106	-	1000	2.85946	2.65	2.96	Fgf12	introns	No_boundary
chr18	25670782	25670857	76	-	1000	2.85946	2.88	3.21	Celf4	introns	No_boundary
chr9	45461401	45461515	115	+	1000	2.85946	2.93	3.26	Dscaml1	introns	No_boundary
chr11	108305096	108305230	135	-	1000	2.85149	2.93	3.26	Prkca	introns	No_boundary
chr11	108317817	108317882	66	-	1000	2.85149	2.8	3.11	Prkca	introns	No_boundary
chr5	132341066	132341141	76	-	1000	2.85149	2.56	2.87	Auts2	introns	No_boundary
chr7	49261536	49261606	71	+	1000	2.85149	2.77	3.09	Nav2	introns	No_boundary
chr1	168300768	168300836	69	-	1000	2.84786	2.83	3.14	Pbx1	introns	No_boundary
chr8	9733507	9733616	110	-	1000	2.84786	2.58	2.88	Nalf1	introns	No_boundary
chr11	3501653	3501869	217	-	1000	2.84615	2.68	2.99	Inpp5j	cds	Exon_intron_boundary
chr5	27099776	27099913	138	+	1000	2.84515	2.58	2.89	Dpp6	introns	No_boundary
chr11	118565949	118566042	94	-	1000	2.84224	2.62	2.93	Rbfox3	introns	No_boundary
chr2	162615132	162615249	118	-	1000	2.84224	2.8	3.11	Ptprt	introns	No_boundary
chr6	136040839	136040975	137	-	1000	2.84224	2.64	2.95	Grin2b	introns	No_boundary
chr1	15397221	15397322	102	+	1000	2.83962	2.67	2.98	Kcnb2	introns	No_boundary
chr7	49267698	49267784	87	+	1000	2.83962	2.86	3.17	Nav2	introns	No_boundary
chr12	88996168	88996314	147	+	1000	2.83956	2.86	3.18	Nrxn3	introns	No_boundary
chr11	81741464	81741562	99	-	1000	2.83932	2.77	3.08	Asic2	introns	No_boundary
chr11	81935359	81935457	99	-	1000	2.83932	2.56	2.87	Asic2	introns	No_boundary
chr3	156603148	156603216	69	+	1000	2.83932	2.74	3.06	Negr1	introns	No_boundary
chr6	31206467	31206534	68	-	1000	2.83932	2.66	2.97	Lncpint	introns	No_boundary
chr5	131751742	131751876	135	-	1000	2.83884	2.57	2.87	Auts2	introns	No_boundary
chr9	45494243	45494336	94	+	1000	2.83467	2.59	2.9	Dscaml1	introns	No_boundary
chr1	168413925	168413963	39	-	1000	2.83009	2.89	3.21	Pbx1	introns	No_boundary
chr2	30347130	30347262	133	-	1000	2.83009	2.9	3.22	Sh3glb2	introns	Exon_intron_boundary
chr8	14557634	14557765	132	+	1000	2.83009	2.71	3.02	Dlgap2	introns	No_boundary
chr1	168404961	168405038	78	-	1000	2.82924	2.86	3.18	Pbx1	introns	No_boundary
chr1	168382649	168382767	119	-	1000	2.82789	2.7	3.01	Pbx1	introns	No_boundary
chr10	90852891	90853029	139	+	1000	2.82784	2.75	3.06	Anks1b	introns	No_boundary
chr5	131695450	131695532	83	-	1000	2.82784	2.6	2.91	Auts2	introns	No_boundary
chr6	6861148	6861273	126	-	1000	2.82784	2.82	3.13	Dlx6os1	introns	Exon_intron_boundary
chrX	103481177	103481257	81	-	1000	2.82784	2.97	3.3	Xist	exons	No_boundary
chr1	168374813	168374863	51	-	1000	2.82754	2.73	3.05	Pbx1	introns	No_boundary
chr10	127191109	127191176	68	-	1000	2.82699	2.64	2.94	Dtx3	cds	Intron_exon_boundary
chr11	108272922	108273033	112	-	1000	2.82699	2.7	3.02	Prkca	introns	No_boundary
chr2	179486587	179486705	119	+	1000	2.82699	2.77	3.09	Cdh4	introns	No_boundary
chr7	49252076	49252172	97	+	1000	2.82699	2.88	3.2	Nav2	introns	No_boundary
chr9	45581830	45581931	102	+	1000	2.82699	2.64	2.95	Dscaml1	introns	No_boundary
chr9	107666524	107666595	72	-	1000	2.82699	2.77	3.08	Slc38a3	introns	No_boundary
chr5	27149801	27149869	69	+	1000	2.8251	2.9	3.23	Dpp6	introns	No_boundary
chr5	132473144	132473258	115	-	1000	2.8251	2.9	3.22	Auts2	introns	No_boundary
chr2	52632560	52632706	147	-	1000	2.82466	2.76	3.08	Cacnb4	introns	No_boundary
chr3	105463195	105463290	96	+	1000	2.82466	2.76	3.07	Kcnd3	introns	No_boundary
chr5	131763315	131763371	57	-	1000	2.82466	2.78	3.09	Auts2	introns	No_boundary
chr5	131859492	131859583	92	-	1000	2.82466	2.65	2.96	Auts2	introns	No_boundary
chr9	34562729	34562824	96	+	1000	2.82466	2.82	3.13	Kirrel3	introns	No_boundary
chr9	68787275	68787382	108	+	1000	2.82466	2.86	3.18	Rora	introns	No_boundary
chr1	168312121	168312192	72	-	1000	2.82353	2.67	2.98	Pbx1	introns	No_boundary
chr3	52087517	52087645	129	-	1000	2.82353	2.87	3.19	Maml3	introns	No_boundary
chr5	27016356	27016440	85	+	1000	2.82353	2.86	3.17	Dpp6	introns	No_boundary
chr18	25678128	25678234	107	-	1000	2.82264	2.91	3.24	Celf4	introns	No_boundary
chr5	131864181	131864311	131	-	1000	2.82264	2.9	3.23	Auts2	introns	No_boundary
chr2	77701948	77702161	214	-	1000	2.82145	2.62	2.93	Zfp385b	introns	No_boundary
chr6	6850685	6850821	137	-	1000	2.82145	2.57	2.88	Dlx6os1	introns	No_boundary
chr7	49259648	49259733	86	+	1000	2.82145	2.83	3.14	Nav2	introns	No_boundary
chr2	6786957	6787017	61	-	1000	2.82022	2.82	3.14	Celf2	introns	No_boundary
chr3	156682781	156682847	67	+	1000	2.82022	2.57	2.87	Negr1	introns	No_boundary
chr7	68011016	68011101	86	+	1000	2.82022	2.65	2.96	Igf1r	introns	No_boundary
chr9	34701698	34701736	39	+	1000	2.82022	2.78	3.1	Kirrel3	introns	No_boundary
chr9	45473687	45473721	35	+	1000	2.82022	2.57	2.88	Dscaml1	introns	No_boundary
chr1	168283079	168283109	31	-	1000	2.81784	2.62	2.93	Pbx1	introns	No_boundary
chr7	79518075	79518163	89	+	1000	2.81784	2.69	2.99	Mir9-3hg	introns	No_boundary
chr9	34720960	34721094	135	+	1000	2.81784	2.67	2.98	Kirrel3	introns	No_boundary
chr15	74556568	74556658	91	+	1000	2.81576	2.63	2.94	Adgrb1	introns	No_boundary
chr7	91111135	91111262	128	+	1000	2.81358	2.59	2.89	Dlg2	introns	No_boundary
chr5	132414346	132414471	126	-	1000	2.81079	2.8	3.11	Auts2	introns	No_boundary
chr17	23812313	23812521	209	+	1000	2.80919	2.87	3.18	Srrm2	cds	Exon_intron_boundary
chr11	81802471	81802557	87	-	1000	2.80696	2.82	3.13	Asic2	introns	No_boundary
chr11	88462914	88463019	106	-	1000	2.80696	2.62	2.92	Msi2	introns	No_boundary
chr11	118760969	118761043	75	-	1000	2.80696	2.76	3.07	Rbfox3	5UTRs	Exon_intron_boundary
chr11	118784263	118784392	130	-	1000	2.80696	2.83	3.15	Rbfox3	introns	No_boundary
chr17	5142338	5142423	86	+	1000	2.80696	2.62	2.93	Arid1b	introns	No_boundary
chr2	162635194	162635281	88	-	1000	2.80696	2.66	2.97	Ptprt	introns	No_boundary
chr3	52092990	52093108	119	-	1000	2.80696	2.86	3.17	Maml3	introns	No_boundary
chr3	153653109	153653281	173	-	1000	2.80696	2.86	3.18	St6galnac3	introns	No_boundary
chr4	153466005	153466129	125	-	1000	2.80696	2.65	2.96	Ajap1	introns	No_boundary
chr5	27258664	27258744	81	+	1000	2.80696	2.67	2.98	Dpp6	introns	No_boundary
chr8	48557415	48557479	65	-	1000	2.80696	2.68	2.99	Tenm3	introns	No_boundary
chr1	168299259	168299317	59	-	1000	2.80568	2.72	3.03	Pbx1	introns	No_boundary
chr3	156621193	156621418	226	+	1000	2.80568	2.55	2.85	Negr1	introns	No_boundary
chr2	25898929	25899030	102	+	1000	2.80543	2.74	3.05	Kcnt1	introns	Exon_intron_boundary
chr9	68699991	68700053	63	+	1000	2.80543	2.58	2.89	Rora	introns	No_boundary
chr9	68864945	68865008	64	+	1000	2.80543	2.6	2.9	Rora	introns	No_boundary
chr4	125531361	125531427	67	+	1000	2.80501	2.66	2.97	Grik3	introns	No_boundary
chr5	125172079	125172162	84	-	1000	2.80501	2.57	2.87	Ncor2	introns	No_boundary
chr8	14309318	14309434	117	+	1000	2.80501	2.68	2.99	Dlgap2	introns	No_boundary
chr11	118773453	118773539	87	-	1000	2.80465	2.75	3.06	Rbfox3	introns	No_boundary
chr16	97037031	97037246	216	-	1000	2.80465	2.77	3.09	Dscam	introns	No_boundary
chr7	61936111	61936184	74	-	1000	2.80465	2.87	3.19	A330076H08Rik	introns	No_boundary
chr8	9484147	9484221	75	-	1000	2.80465	2.59	2.9	Nalf1	introns	No_boundary
chr17	23823682	23823839	158	+	1000	2.80443	2.9	3.23	Srrm2	cds	Exon_intron_boundary
chr11	81582634	81582809	176	-	1000	2.80312	2.75	3.06	Asic2	introns	No_boundary
chr15	53235365	53235488	124	-	1000	2.80312	2.54	2.85	Ext1	introns	No_boundary
chr16	9900182	9900303	122	-	1000	2.80312	2.81	3.12	Grin2a	introns	No_boundary
chr17	5169553	5169614	62	+	1000	2.80312	2.74	3.06	Arid1b	introns	No_boundary
chr17	86356468	86356537	70	+	1000	2.80312	2.58	2.88	Prkce	introns	No_boundary
chr8	117314931	117315007	77	+	1000	2.80312	2.72	3.03	Cmip	introns	No_boundary
chr2	25901115	25901275	161	+	1000	2.80115	2.68	2.99	Kcnt1	cds	Exon_intron_boundary
chr4	125528909	125528989	81	+	1000	2.80115	2.83	3.15	Grik3	introns	No_boundary
chr4	153458440	153458578	139	-	1000	2.80115	2.83	3.14	Ajap1	introns	No_boundary
chr7	96564768	96564838	71	+	1000	2.80115	2.62	2.93	Tenm4	introns	No_boundary
chr8	14561225	14561375	151	+	1000	2.79358	2.74	3.06	Dlgap2	introns	No_boundary
chr1	168417990	168418051	62	-	1000	2.7935	2.63	2.94	Pbx1	introns	No_boundary
chr5	26945154	26945260	107	+	1000	2.79309	2.7	3.01	Dpp6	introns	No_boundary
chr18	84061003	84061124	122	-	1000	2.79006	2.62	2.93	Tshz1	introns	No_boundary
chr5	27089534	27089619	86	+	1000	2.79006	2.62	2.93	Dpp6	introns	No_boundary
chr17	70020424	70020514	91	+	1000	2.78909	2.65	2.96	Dlgap1	introns	No_boundary
chr3	34431199	34431364	166	+	1000	2.78909	2.68	2.99	Sox2ot	introns	No_boundary
chr5	132192299	132192360	62	-	1000	2.78909	2.69	3	Auts2	introns	No_boundary
chr9	34540411	34540447	37	+	1000	2.78909	2.71	3.02	Kirrel3	introns	No_boundary
chr1	168349299	168349350	52	-	1000	2.78837	2.9	3.23	Pbx1	introns	No_boundary
chr11	118845323	118845399	77	-	1000	2.78685	2.58	2.88	Rbfox3	introns	No_boundary
chr12	90019104	90019208	105	+	1000	2.78685	2.62	2.93	Nrxn3	introns	No_boundary
chr14	30246254	30246342	89	-	1000	2.78685	2.66	2.97	Cacna1d	introns	No_boundary
chr14	30341287	30341325	39	-	1000	2.78685	2.66	2.97	Cacna1d	introns	No_boundary
chr16	9899214	9899306	93	-	1000	2.78685	2.6	2.9	Grin2a	introns	No_boundary
chr17	70144778	70144836	59	+	1000	2.78685	2.84	3.16	Dlgap1	introns	No_boundary
chr3	138791872	138791938	67	+	1000	2.78685	2.53	2.84	Tspan5	introns	No_boundary
chr3	153677825	153677956	132	-	1000	2.78685	2.88	3.2	St6galnac3	introns	No_boundary
chr5	116589031	116589136	106	-	1000	2.78685	2.57	2.87	Srrm4	introns	No_boundary
chr8	48511296	48511386	91	-	1000	2.78685	2.9	3.23	Tenm3	introns	No_boundary
chr11	88513950	88514011	62	-	1000	2.78417	2.58	2.88	Msi2	introns	No_boundary
chr11	88638854	88638925	72	-	1000	2.78417	2.78	3.1	Msi2	introns	No_boundary
chr11	118512674	118512761	88	-	1000	2.78417	2.79	3.11	Rbfox3	introns	Exon_intron_boundary
chr11	118791875	118791935	61	-	1000	2.78417	2.7	3.02	Rbfox3	introns	No_boundary
chr5	36382601	36382700	100	-	1000	2.78417	2.78	3.1	Sorcs2	introns	No_boundary
chr5	131715857	131715938	82	-	1000	2.78	2.74	3.05	Auts2	introns	No_boundary
chr9	34630274	34630344	71	+	1000	2.78	2.58	2.89	Kirrel3	introns	No_boundary
chr9	34763113	34763198	86	+	1000	2.78	2.62	2.93	Kirrel3	introns	No_boundary
chr1	15435787	15435976	190	+	1000	2.77971	2.78	3.1	Kcnb2	introns	No_boundary
chr8	9564197	9564289	93	-	1000	2.77744	2.56	2.86	Nalf1	introns	No_boundary
chr11	88703399	88703474	76	-	1000	2.77032	2.66	2.97	Msi2	introns	No_boundary
chr17	24606082	24606193	112	-	1000	2.77032	2.61	2.91	Tsc2	introns	Exon_intron_boundary
chr2	77591405	77591564	160	-	1000	2.77032	2.61	2.91	Zfp385b	introns	No_boundary
chr4	155216103	155216180	78	-	1000	2.77032	2.85	3.17	Ski	introns	No_boundary
chr9	34614239	34614323	85	+	1000	2.77032	2.74	3.05	Kirrel3	introns	No_boundary
chr9	45509903	45510005	103	+	1000	2.77032	2.67	2.98	Dscaml1	introns	No_boundary
chr11	118809783	118809852	70	-	1000	2.76901	2.69	2.99	Rbfox3	introns	No_boundary
chr16	7045465	7045578	114	+	1000	2.76901	2.81	3.12	Rbfox1	introns	No_boundary
chr5	26940499	26940580	82	+	1000	2.76901	2.79	3.1	Dpp6	introns	No_boundary
chr7	49288278	49288362	85	+	1000	2.76901	2.64	2.95	Nav2	introns	No_boundary
chr1	89535784	89535885	102	+	1000	2.76471	2.57	2.88	Agap1	introns	No_boundary
chr19	5825620	5825693	74	-	1000	2.76471	2.91	3.23	NA	introns	Intron_exon_boundary
chr2	162485966	162486052	87	-	1000	2.76471	2.69	3	Ptprt	introns	No_boundary
chr4	151695202	151695298	97	-	1000	2.76471	2.72	3.03	Camta1	introns	No_boundary
chr8	120416132	120416214	83	+	1000	2.76471	2.62	2.92	Gse1	introns	No_boundary
chr9	97980068	97980116	49	-	1000	2.76471	2.61	2.92	Clstn2	introns	No_boundary
chrX	103481308	103481538	231	-	1000	2.76417	2.92	3.24	Xist	exons	No_boundary
chr1	15483935	15484057	123	+	1000	2.76261	2.53	2.84	Kcnb2	introns	No_boundary
chr16	34507463	34507535	73	-	1000	2.75938	2.53	2.84	Kalrn	introns	No_boundary
chr1	168391684	168391790	107	-	1000	2.75933	2.95	3.28	Pbx1	introns	No_boundary
chr5	132252387	132252511	125	-	1000	2.75933	2.56	2.86	Auts2	introns	No_boundary
chr5	132400714	132400814	101	-	1000	2.75933	2.62	2.92	Auts2	introns	No_boundary
chr11	81953591	81953730	140	-	1000	2.75915	2.73	3.04	Asic2	introns	No_boundary
chr2	156520265	156520456	192	+	1000	2.75915	2.76	3.08	Epb41l1	introns	No_boundary
chr2	52672763	52672917	155	-	1000	2.75915	2.66	2.97	Cacnb4	introns	No_boundary
chr5	26935199	26935251	53	+	1000	2.75915	2.56	2.87	Dpp6	introns	No_boundary
chr8	14288740	14288846	107	+	1000	2.75915	2.71	3.02	Dlgap2	introns	No_boundary
chr8	9519725	9519894	170	-	1000	2.75915	2.8	3.12	Nalf1	introns	No_boundary
chr1	168376569	168376721	153	-	1000	2.75614	2.84	3.15	Pbx1	introns	No_boundary
chr2	77618384	77618485	102	-	1000	2.75528	2.52	2.83	Zfp385b	introns	No_boundary
chr9	34612789	34612873	85	+	1000	2.75476	2.58	2.88	Kirrel3	introns	No_boundary
chr15	53287007	53287121	115	-	1000	2.75321	2.72	3.04	Ext1	introns	No_boundary
chr3	138801495	138801566	72	+	1000	2.75321	2.53	2.84	Tspan5	introns	No_boundary
chr3	138818679	138818792	114	+	1000	2.75321	2.61	2.92	Tspan5	introns	No_boundary
chr6	113841393	113841488	96	-	1000	2.75321	2.87	3.19	Atp2b2	introns	No_boundary
chr7	46424717	46424795	79	+	1000	2.75321	2.65	2.96	Kcnc1	introns	No_boundary
chr9	45531154	45531222	69	+	1000	2.75321	2.54	2.84	Dscaml1	introns	No_boundary
chr17	86192889	86192958	70	+	1000	2.75166	2.69	3	Prkce	introns	No_boundary
chr17	27477013	27477079	67	-	1000	2.75166	2.59	2.89	Grm4	introns	No_boundary
chr9	47642284	47642390	107	+	1000	2.75166	2.69	3	Cadm1	introns	No_boundary
chr9	68982261	68982356	96	+	1000	2.75166	2.69	3	Rora	introns	No_boundary
chr1	15325692	15325780	89	+	1000	2.74973	2.78	3.1	Kcnb2	introns	No_boundary
chr8	9610636	9610831	196	-	1000	2.74973	2.92	3.25	Nalf1	introns	No_boundary
chr5	132519026	132519151	126	-	1000	2.74131	2.58	2.89	Auts2	introns	No_boundary
chr1	168402759	168402842	84	-	1000	2.74108	2.88	3.2	Pbx1	introns	No_boundary
chr9	34578844	34578941	98	+	1000	2.74108	2.78	3.1	Kirrel3	introns	No_boundary
chr9	34768590	34768720	131	+	1000	2.74108	2.67	2.98	Kirrel3	introns	No_boundary
chr9	45504658	45504789	132	+	1000	2.74108	2.67	2.98	Dscaml1	introns	No_boundary
chr6	136015101	136015267	167	-	1000	2.74079	2.62	2.92	Grin2b	introns	No_boundary
chr8	14397014	14397146	133	+	1000	2.74079	2.54	2.84	Dlgap2	introns	No_boundary
chr9	34516987	34517066	80	+	1000	2.74079	2.81	3.12	Kirrel3	introns	No_boundary
chr11	57032706	57032868	163	+	1000	2.73753	2.77	3.09	Gria1	introns	No_boundary
chr18	25664806	25664905	100	-	1000	2.73753	2.75	3.07	Celf4	introns	No_boundary
chr3	105497658	105497790	133	+	1000	2.73753	2.73	3.05	Kcnd3	introns	No_boundary
chr5	27128559	27128627	69	+	1000	2.73753	2.79	3.11	Dpp6	introns	No_boundary
chr8	117281640	117281713	74	+	1000	2.73753	2.59	2.9	Cmip	introns	No_boundary
chr9	34672383	34672449	67	+	1000	2.73753	2.63	2.94	Kirrel3	introns	No_boundary
chr1	84241654	84241819	166	-	1000	2.73573	2.55	2.85	Pid1	introns	No_boundary
chr15	93566038	93566146	109	-	1000	2.73573	2.67	2.98	Prickle1	introns	No_boundary
chr2	165870089	165870192	104	-	1000	2.73573	2.7	3.01	Zmynd8	introns	No_boundary
chr4	107807350	107807441	92	+	1000	2.73573	2.52	2.83	Lrp8	introns	No_boundary
chr4	125495144	125495218	75	+	1000	2.73573	2.58	2.88	Grik3	introns	No_boundary
chr4	155210113	155210179	67	-	1000	2.73573	2.69	3	Ski	introns	No_boundary
chr5	132358208	132358268	61	-	1000	2.73573	2.57	2.87	Auts2	introns	No_boundary
chr8	14607258	14607376	119	+	1000	2.73573	2.65	2.96	Dlgap2	introns	No_boundary
chr8	120490520	120490606	87	+	1000	2.73573	2.74	3.05	Gse1	introns	No_boundary
chr9	29306770	29306859	90	-	1000	2.73573	2.58	2.88	Ntm	introns	No_boundary
chr9	34577093	34577192	100	+	1000	2.73212	2.55	2.86	Kirrel3	introns	No_boundary
chr11	108306672	108306797	126	-	1000	2.7318	2.7	3.02	Prkca	introns	No_boundary
chr5	132200099	132200283	185	-	1000	2.73079	2.72	3.03	Auts2	introns	No_boundary
chr8	14401643	14401771	129	+	1000	2.73079	2.76	3.08	Dlgap2	introns	No_boundary
chr8	9490865	9490938	74	-	1000	2.73079	2.62	2.92	Nalf1	introns	No_boundary
chr10	69645026	69645142	117	+	1000	2.72721	2.66	2.97	Ank3	introns	No_boundary
chr10	81471077	81471179	103	-	1000	2.72721	2.64	2.95	Celf5	introns	Exon_intron_boundary
chr3	34232466	34232632	167	+	1000	2.72721	2.64	2.95	Sox2ot	introns	No_boundary
chr5	36889556	36889656	101	+	1000	2.72721	2.69	3	Ppp2r2c	introns	No_boundary
chr9	34662925	34663018	94	+	1000	2.72721	2.73	3.04	Kirrel3	introns	No_boundary
chr9	45463996	45464099	104	+	1000	2.72721	2.84	3.15	Dscaml1	introns	No_boundary
chr9	45517649	45517747	99	+	1000	2.72721	2.6	2.9	Dscaml1	introns	No_boundary
chr18	25644828	25644999	172	-	1000	2.72524	2.83	3.14	Celf4	introns	No_boundary
chr1	168400946	168401023	78	-	1000	2.72453	2.65	2.97	Pbx1	introns	No_boundary
chr11	57037190	57037301	112	+	1000	2.72453	2.67	2.98	Gria1	introns	No_boundary
chr7	79511631	79511736	106	+	1000	2.72453	2.78	3.1	Mir9-3hg	introns	No_boundary
chr1	89470032	89470160	129	+	1000	2.72283	2.69	3	Agap1	introns	No_boundary
chr10	60297928	60298005	78	+	1000	2.72283	2.68	2.99	Psap	introns	No_boundary
chr11	81912824	81912924	101	-	1000	2.72283	2.62	2.92	Asic2	introns	No_boundary
chr17	86169839	86169915	77	+	1000	2.72283	2.61	2.92	Prkce	introns	No_boundary
chr17	86193665	86193764	100	+	1000	2.72283	2.87	3.19	Prkce	introns	No_boundary
chr2	179473050	179473126	77	+	1000	2.72283	2.55	2.86	Cdh4	introns	No_boundary
chr3	138768647	138768705	59	+	1000	2.72283	2.56	2.86	Tspan5	introns	No_boundary
chr5	26877032	26877114	83	+	1000	2.72283	2.72	3.03	Dpp6	introns	No_boundary
chr8	14570796	14570856	61	+	1000	2.72283	2.56	2.86	Dlgap2	introns	No_boundary
chr1	168263130	168263203	74	-	1000	2.71215	2.67	2.98	Pbx1	introns	No_boundary
chr5	132432111	132432206	96	-	1000	2.71215	2.65	2.96	Auts2	introns	No_boundary
chr15	74551849	74551935	87	+	1000	2.7118	2.65	2.96	Adgrb1	introns	No_boundary
chr10	76959476	76959610	135	-	1000	2.71144	2.63	2.94	Pcbp3	introns	No_boundary
chr11	62604542	62604582	41	+	1000	2.71144	2.93	3.26	2410006H16Rik	introns	Exon_intron_boundary
chr1	168386318	168386372	55	-	1000	2.70954	2.8	3.11	Pbx1	introns	No_boundary
chr2	6862893	6863008	116	-	1000	2.70954	2.63	2.94	Celf2	introns	No_boundary
chr11	98473719	98473803	85	-	1000	2.7062	2.81	3.12	Ikzf3	introns	No_boundary
chr1	89492268	89492325	58	+	1000	2.70607	2.5	2.81	Agap1	introns	No_boundary
chr13	76392145	76392227	83	+	1000	2.70607	2.52	2.82	Mctp1	introns	No_boundary
chr14	11587430	11587527	98	+	1000	2.70607	2.5	2.81	Ptprg	introns	No_boundary
chr14	30213660	30213764	105	-	1000	2.70607	2.57	2.87	Cacna1d	introns	No_boundary
chr17	86230135	86230276	142	+	1000	2.70607	2.68	2.98	Prkce	introns	No_boundary
chr3	153612729	153612854	126	-	1000	2.70607	2.53	2.84	St6galnac3	introns	No_boundary
chr3	153665949	153666022	74	-	1000	2.70607	2.54	2.85	St6galnac3	introns	No_boundary
chr4	125543622	125543681	60	+	1000	2.70607	2.58	2.89	Grik3	introns	No_boundary
chr8	120497055	120497102	48	+	1000	2.70607	2.82	3.13	Gse1	introns	No_boundary
chr12	107960372	107960465	94	-	1000	2.70527	2.68	2.99	Bcl11b	introns	No_boundary
chr16	7059462	7059582	121	+	1000	2.70527	2.64	2.95	Rbfox1	introns	No_boundary
chr17	8556161	8556295	135	+	1000	2.70527	2.71	3.02	Pde10a	introns	No_boundary
chr17	8792155	8792258	104	+	1000	2.70527	2.51	2.81	Pde10a	introns	No_boundary
chr6	5853041	5853122	82	+	1000	2.70527	2.52	2.83	Dync1i1	introns	No_boundary
chr8	117286924	117287013	90	+	1000	2.70527	2.72	3.04	Cmip	introns	No_boundary
chr10	69654599	69654681	83	+	1000	2.7032	2.63	2.94	Ank3	introns	No_boundary
chr11	74905421	74905509	89	+	1000	2.7032	2.92	3.25	Tsr1	introns	Exon_intron_boundary
chr17	70142123	70142223	101	+	1000	2.7032	2.75	3.07	Dlgap1	introns	No_boundary
chr7	49282807	49282881	75	+	1000	2.7032	2.77	3.08	Nav2	introns	No_boundary
chr8	110842385	110842465	81	-	1000	2.7032	2.84	3.15	Sf3b3	introns	Exon_intron_boundary
chr11	118776129	118776231	103	-	1000	2.70246	2.87	3.18	Rbfox3	introns	No_boundary
chr14	11729626	11729699	74	+	1000	2.70246	2.63	2.94	Ptprg	introns	No_boundary
chr16	12051108	12051251	144	+	1000	2.70246	2.72	3.03	Shisa9	introns	No_boundary
chr16	9921958	9922008	51	-	1000	2.70246	2.54	2.84	Grin2a	introns	No_boundary
chr2	52660469	52660581	113	-	1000	2.70246	2.68	2.99	Cacnb4	introns	No_boundary
chr5	27277724	27277794	71	+	1000	2.70246	2.52	2.83	Dpp6	introns	No_boundary
chr8	111538539	111538622	84	+	1000	2.70246	2.65	2.96	Znrf1	introns	No_boundary
chr8	120494061	120494112	52	+	1000	2.70246	2.65	2.96	Gse1	introns	No_boundary
chr4	155193187	155193294	108	-	1000	2.7015	2.67	2.98	Ski	introns	No_boundary
chr7	49280721	49280825	105	+	1000	2.7015	2.57	2.88	Nav2	introns	No_boundary
chr8	9644324	9644379	56	-	1000	2.7015	2.76	3.08	Nalf1	introns	No_boundary
chr8	47398081	47398193	113	-	1000	2.7015	2.8	3.11	Stox2	introns	No_boundary
chr11	88550891	88550959	69	-	1000	2.70142	2.72	3.03	Msi2	introns	No_boundary
chr2	52617889	52617967	79	-	1000	2.70142	2.54	2.84	Cacnb4	introns	No_boundary
chr2	167156194	167156315	122	-	1000	2.70142	2.5	2.81	Kcnb1	introns	No_boundary
chr5	121990969	121991038	70	-	1000	2.70142	2.53	2.84	Cux2	introns	No_boundary
chr5	125055876	125055997	122	-	1000	2.70142	2.58	2.89	Ncor2	introns	Exon_intron_boundary
chr7	111715524	111715601	78	-	1000	2.70142	2.59	2.9	Galnt18	introns	No_boundary
chr8	117260467	117260610	144	+	1000	2.70142	2.84	3.15	Cmip	introns	No_boundary
chr5	27054019	27054139	121	+	1000	2.70025	2.52	2.83	Dpp6	introns	No_boundary
chr5	125059814	125059933	120	-	1000	2.70025	2.64	2.95	Ncor2	introns	No_boundary
chr1	168374130	168374328	199	-	1000	2.69849	2.59	2.9	Pbx1	introns	No_boundary
chr10	127090267	127090313	47	+	1000	2.69629	2.71	3.02	Agap2	introns	Exon_intron_boundary
chr11	108273364	108273583	220	-	1000	2.69629	2.74	3.06	Prkca	introns	No_boundary
chr18	25592623	25592708	86	-	1000	2.69629	2.77	3.09	Celf4	introns	No_boundary
chr5	132186682	132186751	70	-	1000	2.69629	2.59	2.9	Auts2	introns	No_boundary
chr8	95704907	95705006	100	+	1000	2.69629	2.65	2.96	Ndrg4	introns	No_boundary
chr17	23816888	23817239	352	+	1000	2.6943	2.89	3.21	Srrm2	cds	No_boundary
chr1	15409966	15410160	195	+	1000	2.69403	2.55	2.86	Kcnb2	introns	No_boundary
chr18	25607397	25607527	131	-	1000	2.69373	2.58	2.89	Celf4	introns	No_boundary
chr4	155216255	155216319	65	-	1000	2.69373	2.73	3.04	Ski	introns	No_boundary
chr9	45507880	45507984	105	+	1000	2.69373	2.66	2.97	Dscaml1	introns	No_boundary
chr4	155192612	155192737	126	-	1000	2.6922	2.62	2.92	Ski	introns	No_boundary
chr5	132400531	132400614	84	-	1000	2.6922	2.55	2.85	Auts2	introns	No_boundary
chr11	88582422	88582561	140	-	1000	2.69184	2.56	2.86	Msi2	introns	No_boundary
chr3	28268325	28268433	109	+	1000	2.69184	2.82	3.13	Tnik	introns	No_boundary
chr4	155209819	155209910	92	-	1000	2.69184	2.6	2.91	Ski	introns	No_boundary
chr9	45480096	45480181	86	+	1000	2.69184	2.76	3.07	Dscaml1	introns	No_boundary
chr9	68686470	68686616	147	+	1000	2.69184	2.61	2.91	Rora	introns	No_boundary
chr11	57294705	57294797	93	+	1000	2.68916	2.74	3.05	Gria1	introns	No_boundary
chr5	26906814	26906909	96	+	1000	2.68806	2.7	3.01	Dpp6	introns	No_boundary
chr9	68795300	68795421	122	+	1000	2.68806	2.81	3.13	Rora	introns	No_boundary
chr10	14001752	14001858	107	+	1000	2.68789	2.53	2.84	Hivep2	introns	No_boundary
chr5	26986792	26986883	92	+	1000	2.68789	2.73	3.04	Dpp6	introns	No_boundary
chr9	34505461	34505578	118	+	1000	2.68789	2.51	2.81	Kirrel3	introns	No_boundary
chr10	69597327	69597435	109	+	1000	2.68479	2.59	2.89	Ank3	introns	No_boundary
chr16	34511091	34511200	110	-	1000	2.68479	2.79	3.1	Kalrn	introns	No_boundary
chr5	131653069	131653173	105	-	1000	2.68479	2.72	3.03	Auts2	introns	No_boundary
chr8	117268545	117268626	82	+	1000	2.68479	2.62	2.93	Cmip	introns	No_boundary
chr9	34579097	34579176	80	+	1000	2.68479	2.8	3.12	Kirrel3	introns	No_boundary
chr9	45550701	45550786	86	+	1000	2.68479	2.75	3.06	Dscaml1	introns	No_boundary
chr10	60114591	60114677	87	+	1000	2.6783	2.64	2.95	Spock2	introns	No_boundary
chr2	179455678	179455755	78	+	1000	2.6783	2.58	2.88	Cdh4	introns	No_boundary
chr6	6862959	6863021	63	-	1000	2.6783	2.5	2.81	Dlx6os1	introns	No_boundary
chr8	14264528	14264591	64	+	1000	2.6783	2.51	2.81	Dlgap2	introns	No_boundary
chr8	14441242	14441327	86	+	1000	2.6783	2.54	2.85	Dlgap2	introns	No_boundary
chr1	15457657	15457761	105	+	1000	2.67176	2.76	3.08	Kcnb2	introns	No_boundary
chr10	69598808	69598893	86	+	1000	2.66589	2.52	2.82	Ank3	introns	No_boundary
chr11	108151515	108151619	105	-	1000	2.66589	2.84	3.15	Prkca	introns	No_boundary
chr17	70691411	70691480	70	+	1000	2.66589	2.71	3.03	Dlgap1	introns	No_boundary
chr2	6876978	6877014	37	-	1000	2.66589	2.81	3.12	Celf2	introns	No_boundary
chr6	113872348	113872482	135	-	1000	2.66589	2.52	2.83	Atp2b2	introns	No_boundary
chr9	68813590	68813740	151	+	1000	2.66589	2.72	3.03	Rora	introns	No_boundary
chr5	132462721	132462803	83	-	1000	2.66396	2.64	2.95	Auts2	introns	No_boundary
chr10	108806305	108806424	120	-	1000	2.6612	2.54	2.85	Syt1	introns	No_boundary
chr8	9673474	9673575	102	-	1000	2.6612	2.85	3.16	Nalf1	introns	No_boundary
chr9	45477814	45478044	231	+	1000	2.6612	2.51	2.81	Dscaml1	introns	No_boundary
chr12	109546130	109546225	96	+	1000	2.65685	2.88	3.21	Meg3	introns	Exon_intron_boundary
chr18	84076825	84076945	121	-	1000	2.65677	2.56	2.86	Tshz1	introns	No_boundary
chr12	89810282	89810353	72	+	1000	2.65649	2.58	2.89	Nrxn3	introns	No_boundary
chr7	28815583	28815662	80	+	1000	2.65649	2.55	2.86	Hnrnpl	introns	Exon_intron_boundary
chr8	14398105	14398236	132	+	1000	2.65649	2.55	2.85	Dlgap2	introns	No_boundary
chr8	47361091	47361212	122	-	1000	2.65649	2.5	2.8	Stox2	introns	No_boundary
chr9	34722600	34722663	64	+	1000	2.65649	2.53	2.84	Kirrel3	introns	No_boundary
chr9	68711035	68711217	183	+	1000	2.65649	2.84	3.16	Rora	introns	No_boundary
chr11	19979072	19979200	129	+	1000	2.65594	2.55	2.85	Spred2	introns	No_boundary
chr11	6059364	6059472	109	-	1000	2.65594	2.82	3.13	Camk2b	introns	No_boundary
chr11	118734241	118734315	75	-	1000	2.65594	2.5	2.81	Rbfox3	introns	No_boundary
chr11	118778215	118778279	65	-	1000	2.65594	2.67	2.98	Rbfox3	introns	No_boundary
chr17	8546777	8546852	76	+	1000	2.65594	2.57	2.87	Pde10a	introns	No_boundary
chr2	25430291	25430388	98	+	1000	2.65594	2.48	2.78	Abca2	introns	No_boundary
chr3	156575847	156575928	82	+	1000	2.65594	2.68	2.98	Negr1	introns	No_boundary
chr4	125523170	125523243	74	+	1000	2.65594	2.57	2.87	Grik3	introns	No_boundary
chr7	144301680	144301797	118	+	1000	2.65594	2.69	3	Shank2	introns	No_boundary
chr8	14472302	14472423	122	+	1000	2.65594	2.65	2.96	Dlgap2	introns	No_boundary
chr8	120517513	120517618	106	+	1000	2.65594	2.82	3.14	Gse1	introns	No_boundary
chr8	9460317	9460414	98	-	1000	2.65594	2.66	2.97	Nalf1	introns	No_boundary
chr9	68807658	68807741	84	+	1000	2.65594	2.59	2.89	Rora	introns	No_boundary
chr11	81959042	81959133	92	-	1000	2.65563	2.56	2.86	Asic2	introns	No_boundary
chr5	27258420	27258481	62	+	1000	2.65563	2.57	2.88	Dpp6	introns	No_boundary
chr7	46402595	46402663	69	+	1000	2.65563	2.63	2.94	Kcnc1	introns	No_boundary
chr7	49294771	49294867	97	+	1000	2.65563	2.6	2.9	Nav2	introns	No_boundary
chr9	68812317	68812398	82	+	1000	2.65563	2.65	2.96	Rora	introns	No_boundary
chr1	168342030	168342131	102	-	1000	2.65521	2.8	3.12	Pbx1	introns	No_boundary
chr7	45126868	45126940	73	-	1000	2.65408	2.92	3.24	Rpl13a	introns	Exon_intron_boundary
chr19	32172093	32172246	154	-	1000	2.65041	2.65	2.96	Sgms1	introns	No_boundary
chr2	169656560	169656637	78	+	1000	2.65041	2.6	2.91	Tshz2	introns	No_boundary
chr3	25633038	25633137	100	-	1000	2.65041	2.51	2.82	Nlgn1	introns	No_boundary
chr5	121979791	121979865	75	-	1000	2.65041	2.61	2.92	Cux2	introns	No_boundary
chr7	68093959	68094014	56	+	1000	2.65041	2.5	2.81	Igf1r	introns	No_boundary
chr8	120369756	120369830	75	+	1000	2.65041	2.7	3.01	Gse1	introns	No_boundary
chr1	15318317	15318365	49	+	1000	2.6451	2.69	3	Kcnb2	introns	No_boundary
chr17	33819734	33819829	96	+	1000	2.6451	2.74	3.05	Kank3	cds	Exon_intron_boundary
chr3	138820681	138820826	146	+	1000	2.6451	2.6	2.9	Tspan5	introns	No_boundary
chr9	29372780	29372945	166	-	1000	2.6451	2.66	2.97	Ntm	introns	No_boundary
chr18	25649353	25649509	157	-	1000	2.64332	2.63	2.94	Celf4	introns	No_boundary
chr5	26946759	26946869	111	+	1000	2.64332	2.51	2.82	Dpp6	introns	No_boundary
chr6	37299053	37299206	154	-	1000	2.64332	2.74	3.05	Dgki	introns	Exon_intron_boundary
chr7	79514464	79514556	93	+	1000	2.64332	2.63	2.93	Mir9-3hg	introns	No_boundary
chr9	34498783	34498850	68	+	1000	2.64332	2.75	3.06	Kirrel3	introns	No_boundary
chr11	108288968	108289074	107	-	1000	2.643	2.79	3.1	Prkca	introns	No_boundary
chr8	9642082	9642160	79	-	1000	2.64292	2.48	2.78	Nalf1	introns	No_boundary
[truncated: 207,310+ more rows]

## Sheet: Annotated_featurecounts_inputHR
Geneid	Chr	Start	End	H1in	H2in	SYMBOL
ENSMUSG00000051951	chr1	3205901	3671498	88	179	Xkr4
ENSMUSG00000025900	chr1	3999557	4409241	124	241	Rp1
ENSMUSG00000025902	chr1	4490931	4497354	56	92	Sox17
ENSMUSG00000033845	chr1	4773206	4785739	36	111	Mrpl15
ENSMUSG00000025903	chr1	4807788	4848410	224	470	Lypla1
ENSMUSG00000104217	chr1	4807892	4886770	326	606	NA
ENSMUSG00000033813	chr1	4857814	4897909	137	212	Tcea1
ENSMUSG00000033793	chr1	5070018	5162529	216	407	Atp6v1h
ENSMUSG00000025907	chr1	6206197	6276648	499	1004	Rb1cc1
ENSMUSG00000090031	chr1	6209866	6215293	57	95	NA
ENSMUSG00000051285	chr1	7088920	7173628	451	897	Pcmtd1
ENSMUSG00000103509	chr1	7148110	7152137	38	71	NA
ENSMUSG00000097797	chr1	7349406	7397869	14	24	NA
ENSMUSG00000025909	chr1	8361475	9299878	72	115	Sntg1
ENSMUSG00000061024	chr1	9545408	9547455	26	46	Rrs1
ENSMUSG00000025911	chr1	9547948	9580673	187	365	Adhfe1
ENSMUSG00000079671	chr1	9560832	9631175	158	275	NA
ENSMUSG00000045210	chr1	9718622	9748382	137	227	Vcpip1
ENSMUSG00000025915	chr1	9798107	9900845	286	539	Sgk3
ENSMUSG00000098234	chr1	9941959	9944118	31	60	Snhg6
ENSMUSG00000093178	chr1	9942463	9942549	19	42	Snord87
ENSMUSG00000025917	chr1	10024601	10038168	72	130	Cops5
ENSMUSG00000056763	chr1	10037987	10136768	223	438	Cspp1
ENSMUSG00000067851	chr1	10137571	10232670	742	1375	Arfgef1
ENSMUSG00000042501	chr1	10324720	10719945	26	32	Cpa6
ENSMUSG00000048960	chr1	10993465	11303681	1266	2506	Prex2
ENSMUSG00000057715	chr1	11414105	11975901	24	46	A830018L16Rik
ENSMUSG00000093864	chr1	12374936	12375042	21	32	NA
ENSMUSG00000016918	chr1	12692277	12861192	467	869	Sulf1
ENSMUSG00000025938	chr1	12866549	12992650	198	331	Slco5a1
ENSMUSG00000005886	chr1	13139105	13374083	1346	2310	Ncoa2
ENSMUSG00000104170	chr1	13297036	13298907	16	11	NA
ENSMUSG00000103085	chr1	13343563	13348204	38	71	NA
ENSMUSG00000102664	chr1	13354483	13356730	33	58	NA
ENSMUSG00000025935	chr1	13564698	13589910	150	317	Tram1
ENSMUSG00000025937	chr1	13623330	13660546	160	273	Lactb2
ENSMUSG00000025932	chr1	14168954	14310235	32	51	Eya1
ENSMUSG00000092083	chr1	15287254	15723750	125	189	Kcnb2
ENSMUSG00000025925	chr1	15805646	15844052	154	243	Terf1
ENSMUSG00000043716	chr1	16101295	16104662	45	124	Rpl7
ENSMUSG00000025921	chr1	16105774	16133734	89	159	Rdh10
ENSMUSG00000025920	chr1	16228674	16520112	600	1019	Stau2
ENSMUSG00000025939	chr1	16540790	16619489	346	534	Ube2w
ENSMUSG00000079658	chr1	16641725	16657042	97	195	Eloc
ENSMUSG00000025940	chr1	16665207	16678275	87	220	Tmem70
ENSMUSG00000025779	chr1	16688051	16709611	24	56	Ly96
ENSMUSG00000042686	chr1	16964560	17097889	282	518	Jph1
ENSMUSG00000067780	chr1	17601901	17630939	42	95	Pi15
ENSMUSG00000085125	chr1	17676027	17727646	11	20	Gm16070
ENSMUSG00000025776	chr1	17727045	17766344	21	56	Crispld1
ENSMUSG00000025931	chr1	20890606	20939650	24	53	Paqr8
ENSMUSG00000041809	chr1	20951626	20990841	11	16	Efhc1
ENSMUSG00000041779	chr1	20996299	21079229	203	397	Tram2
ENSMUSG00000025933	chr1	21218575	21230167	11	16	Tmem14a
ENSMUSG00000025934	chr1	21240589	21265661	102	134	Gsta3
ENSMUSG00000025936	chr1	21285246	21298312	29	56	NA
ENSMUSG00000028033	chr1	21398403	21961942	152	258	Kcnq5
ENSMUSG00000041670	chr1	22286251	22805994	42	56	Rims1
ENSMUSG00000097970	chr1	23291537	23291935	14	21	NA
ENSMUSG00000100775	chr1	23293729	23294075	10	17	NA
ENSMUSG00000026158	chr1	23366424	23397772	78	141	Ogfrl1
ENSMUSG00000026155	chr1	23844846	23922317	338	646	Smap1
ENSMUSG00000026154	chr1	23995939	24005656	50	84	Sdhaf4
ENSMUSG00000026153	chr1	24011093	24100341	333	659	Fam135a
ENSMUSG00000073725	chr1	24678630	24766301	420	710	Lmbrd1
ENSMUSG00000033569	chr1	25067476	25829707	62	113	Adgrb3
ENSMUSG00000095256	chr1	26959103	26959221	65	105	NA
ENSMUSG00000048874	chr1	30802339	30873921	393	780	Phf3
ENSMUSG00000103783	chr1	30833548	30836431	10	28	NA
ENSMUSG00000104315	chr1	30865504	30868538	25	47	NA
ENSMUSG00000026064	chr1	30940302	30949309	49	119	Ptp4a1
ENSMUSG00000117310	chr1	30940302	30949770	52	125	Ptp4a1
ENSMUSG00000026058	chr1	32172714	32658568	16	13	Khdrbs2
ENSMUSG00000026134	chr1	33453810	33669795	162	266	Prim2
ENSMUSG00000004768	chr1	33719887	33742564	60	105	Rab23
ENSMUSG00000042215	chr1	33745484	33757795	70	120	Bag2
ENSMUSG00000042197	chr1	33761545	33814595	250	467	Zfp451
ENSMUSG00000026131	chr1	33908225	34308661	3410	7080	Dst
ENSMUSG00000103364	chr1	34032100	34033797	17	39	NA
ENSMUSG00000026127	chr1	34439851	34449356	38	75	Imp4
ENSMUSG00000026126	chr1	34459762	34475733	15	21	Ptpn18
ENSMUSG00000037509	chr1	34678188	34813309	32	33	Arhgef4
ENSMUSG00000037503	chr1	34813219	34843065	370	596	Fam168b
ENSMUSG00000026123	chr1	34849976	34879580	250	492	Plekhb2
ENSMUSG00000045216	chr1	36068400	36106446	200	358	Hs6st1
ENSMUSG00000037470	chr1	36140027	36244720	302	624	Uggt1
ENSMUSG00000047180	chr1	36264597	36274679	16	18	Neurl3
ENSMUSG00000037447	chr1	36307733	36324029	47	72	Arid5a
ENSMUSG00000010453	chr1	36335730	36369181	405	734	Kansl3
ENSMUSG00000001143	chr1	36419871	36445271	116	233	Lman2l
ENSMUSG00000037408	chr1	36471620	36508764	33	72	Cnnm4
ENSMUSG00000001138	chr1	36511867	36528237	147	204	Cnnm3
ENSMUSG00000067653	chr1	36530188	36536883	249	522	Ankrd23
ENSMUSG00000109510	chr1	36530193	36539429	272	573	NA
ENSMUSG00000079610	chr1	36537507	36547445	33	81	Ankrd39
ENSMUSG00000026121	chr1	36548639	36558349	98	167	Sema4c
ENSMUSG00000061518	chr1	36691449	36693681	126	342	Cox5b
ENSMUSG00000037351	chr1	36698114	36714422	153	314	Actr1b
ENSMUSG00000026116	chr1	36792191	36943666	782	1442	Tmem131
ENSMUSG00000102930	chr1	36913601	36916539	17	41	NA
ENSMUSG00000103159	chr1	36922797	36926348	18	57	NA
ENSMUSG00000095944	chr1	37005439	37005557	151	201	NA
ENSMUSG00000026113	chr1	37299865	37410736	591	948	Inpp4a
ENSMUSG00000026112	chr1	37417084	37430103	387	733	Coa5
ENSMUSG00000026111	chr1	37430139	37439124	55	104	Unc50
ENSMUSG00000026110	chr1	37439340	37541016	620	979	Mgat4a
ENSMUSG00000026090	chr1	37611677	37720085	32	42	Cracdl
ENSMUSG00000060771	chr1	37754776	37866429	83	119	Tsga10
ENSMUSG00000026088	chr1	37874801	37890411	29	42	Mitd1
ENSMUSG00000026087	chr1	37890477	37898535	78	162	Mrpl30
ENSMUSG00000058407	chr1	37985189	37997893	70	177	Txndc9
ENSMUSG00000026083	chr1	37998010	38055579	210	409	Eif5b
ENSMUSG00000026082	chr1	38052786	38129801	385	694	Rev1
ENSMUSG00000037138	chr1	38177326	38664955	218	387	Aff3
ENSMUSG00000048814	chr1	38793645	38836711	49	78	Lonrf2
ENSMUSG00000026078	chr1	38985608	38997238	59	94	Pdcl3
ENSMUSG00000103046	chr1	38992678	38994316	10	12	NA
ENSMUSG00000026077	chr1	39193731	39363236	183	287	Npas2
ENSMUSG00000073702	chr1	39367842	39371911	49	113	Rpl31
ENSMUSG00000003134	chr1	39371492	39478755	172	356	Tbc1d8
ENSMUSG00000003135	chr1	39534992	39546889	43	103	Cnot11
ENSMUSG00000085894	chr1	39547570	39552002	21	53	NA
ENSMUSG00000048234	chr1	39551296	39577405	159	184	Rnf149
ENSMUSG00000026074	chr1	39900913	40026310	1460	2403	Map4k4
ENSMUSG00000026072	chr1	40225080	40317257	197	366	Il1r1
ENSMUSG00000070942	chr1	40324610	40367562	32	66	Il1rl2
ENSMUSG00000026070	chr1	40465552	40500854	10	12	Il18r1
ENSMUSG00000026062	chr1	40680574	40769273	12	21	Slc9a2
ENSMUSG00000079588	chr1	40805601	40856887	488	971	Tmem182
ENSMUSG00000060679	chr1	42851233	42905683	266	504	Mrps9
ENSMUSG00000070939	chr1	43047200	43098637	141	284	Tgfbrap1
ENSMUSG00000010290	chr1	43098710	43115947	75	161	AI597479
ENSMUSG00000008136	chr1	43123074	43196984	9456	17268	Fhl2
ENSMUSG00000066877	chr1	43444579	43570515	538	919	Nck2
ENSMUSG00000057363	chr1	43746966	43827800	126	184	Uxs1
ENSMUSG00000041763	chr1	43933647	44003000	314	655	Tpp2
ENSMUSG00000026049	chr1	44086613	44102441	29	36	Tex30
ENSMUSG00000101104	chr1	44091463	44110790	27	57	NA
ENSMUSG00000026047	chr1	44106546	44118808	30	77	Poglut2
ENSMUSG00000041684	chr1	44118957	44144770	55	81	Bivm
ENSMUSG00000026048	chr1	44147744	44181260	122	203	Ercc5
ENSMUSG00000056870	chr1	44551511	44796838	527	947	Gulp1
ENSMUSG00000102319	chr1	44560885	44565447	21	27	NA
ENSMUSG00000026043	chr1	45311538	45349706	1419	2719	Col3a1
ENSMUSG00000105211	chr1	45311673	45311813	65	157	NA
ENSMUSG00000026042	chr1	45374321	45503282	271	659	Col5a2
ENSMUSG00000025995	chr1	45795166	45823619	69	113	Wdr75
ENSMUSG00000025993	chr1	45908068	45926523	23	56	Slc40a1
ENSMUSG00000041144	chr1	46066315	46373550	29	69	Dnah7b
ENSMUSG00000096047	chr1	46374197	46374315	137	189	NA
ENSMUSG00000025986	chr1	46807544	46892852	113	215	Slc39a10
ENSMUSG00000064943	chr1	48462173	48462293	23	34	Gm23240
ENSMUSG00000026109	chr1	50900647	51187270	53	103	Tmeff2
ENSMUSG00000045954	chr1	51289126	51302960	329	812	Cavin2
ENSMUSG00000026107	chr1	51465862	51478425	158	274	Nabp1
ENSMUSG00000101741	chr1	51696324	51746943	15	23	NA
ENSMUSG00000018417	chr1	51749765	51916071	582	1147	Myo1b
ENSMUSG00000101628	chr1	52077261	52156087	125	253	NA
ENSMUSG00000026104	chr1	52119440	52161865	152	316	Stat1
ENSMUSG00000026103	chr1	52163448	52233232	494	1047	Gls
ENSMUSG00000002881	chr1	52457294	52500679	160	379	Nab1
ENSMUSG00000043015	chr1	52630703	52651919	21	43	Nemp2
ENSMUSG00000041439	chr1	52656286	52727462	118	248	Mfsd6
ENSMUSG00000026102	chr1	52785427	52817688	145	292	Inpp1
ENSMUSG00000041426	chr1	52844929	52920986	161	309	Hibch
ENSMUSG00000026098	chr1	53189187	53297018	76	191	Pms1
ENSMUSG00000026097	chr1	53297095	53310309	17	37	Ormdl1
ENSMUSG00000100679	chr1	53297111	53318035	56	124	NA
ENSMUSG00000026096	chr1	53313624	53326343	99	197	Osgepl1
ENSMUSG00000099913	chr1	53325507	53352667	75	151	NA
ENSMUSG00000026095	chr1	53344617	53352752	75	144	Asnsd1
ENSMUSG00000117809	chr1	53348479	53352619	26	24	Gm50478
ENSMUSG00000026094	chr1	53755506	53785224	82	191	Stk17b
ENSMUSG00000042807	chr1	53806876	54195168	1047	1854	Hecw2
ENSMUSG00000041303	chr1	54396004	54438971	108	216	Gtf3c3
ENSMUSG00000073678	chr1	54472994	54557684	73	115	Pgap1
ENSMUSG00000052331	chr1	54645340	54926387	646	1206	Ankrd44
ENSMUSG00000102642	chr1	54913845	54916594	16	32	NA
ENSMUSG00000025982	chr1	54985169	55027481	426	1012	Sf3b1
ENSMUSG00000025981	chr1	55052770	55072702	202	316	Coq10b
ENSMUSG00000025980	chr1	55077835	55088243	148	394	Hspd1
ENSMUSG00000073676	chr1	55088132	55091307	27	76	Hspe1
ENSMUSG00000025979	chr1	55131231	55154899	136	250	Mob4
ENSMUSG00000025978	chr1	55170159	55226782	54	76	Rftn2
ENSMUSG00000046994	chr1	55237177	55248470	43	81	Mars2
ENSMUSG00000038349	chr1	55405921	55754285	1919	3336	Plcl1
ENSMUSG00000102145	chr1	55440904	55445930	58	87	NA
ENSMUSG00000038331	chr1	56793981	56978650	35	67	Satb2
ENSMUSG00000048495	chr1	57388237	57407101	34	46	Tyw5
ENSMUSG00000025971	chr1	57406328	57417953	26	91	Maip1
ENSMUSG00000038305	chr1	57774162	57948394	146	283	Spats2l
ENSMUSG00000054770	chr1	57955101	58018956	35	68	Kctd18
ENSMUSG00000026039	chr1	57995971	58025899	24	52	Sgo2a
ENSMUSG00000063558	chr1	58029931	58106413	386	693	Aox1
ENSMUSG00000064294	chr1	58113130	58200698	10	22	Aox3
ENSMUSG00000051223	chr1	58392898	58407353	115	232	Bzw1
ENSMUSG00000026034	chr1	58410189	58424066	367	742	Clk1
ENSMUSG00000026035	chr1	58430994	58445486	32	55	Ppil3
ENSMUSG00000026036	chr1	58445151	58481816	17	51	Nif3l1
ENSMUSG00000026037	chr1	58462771	58505109	96	166	Orc2
ENSMUSG00000094245	chr1	58466515	58466621	13	34	NA
ENSMUSG00000038174	chr1	58522806	58586323	215	357	Hycc2
ENSMUSG00000026032	chr1	58586384	58595964	78	195	Ndufb3
ENSMUSG00000026031	chr1	58711508	58758884	408	777	Cflar
ENSMUSG00000026029	chr1	58795374	58847503	127	267	Casp8
ENSMUSG00000102719	chr1	58797783	58801623	18	35	NA
ENSMUSG00000026028	chr1	58900449	58973430	700	1307	Trak2
ENSMUSG00000026027	chr1	58973522	58995715	115	265	Stradb
ENSMUSG00000079550	chr1	59120935	59163389	11	10	Mpp4
ENSMUSG00000026024	chr1	59162926	59237231	102	208	Als2
ENSMUSG00000041075	chr1	59482424	59486955	34	61	Fzd7
ENSMUSG00000026021	chr1	59586558	59670834	220	331	Sumo1
ENSMUSG00000026020	chr1	59684971	59719044	81	166	Nop58
ENSMUSG00000089093	chr1	59704790	59704873	15	32	NA
ENSMUSG00000067336	chr1	59763400	59879014	910	1960	Bmpr2
ENSMUSG00000104052	chr1	59801263	59804700	12	28	NA
ENSMUSG00000041040	chr1	59913006	59985346	628	1091	Fam117b
ENSMUSG00000103696	chr1	59929688	59935102	46	62	NA
ENSMUSG00000026019	chr1	60069785	60098645	47	67	Wdr12
ENSMUSG00000026017	chr1	60098247	60153953	109	214	Carf
ENSMUSG00000073664	chr1	60180599	60338328	1097	2272	Nbeal1
ENSMUSG00000049439	chr1	60343323	60388060	75	166	Cyp20a1
ENSMUSG00000026782	chr1	60409619	60481158	183	360	Abi2
ENSMUSG00000026014	chr1	60482292	60567104	1670	3137	Raph1
ENSMUSG00000026012	chr1	60716800	60773359	33	63	Cd28
ENSMUSG00000026011	chr1	60887000	60915832	60	85	Ctla4
ENSMUSG00000052062	chr1	61638824	62642284	2220	3744	Pard3b
ENSMUSG00000104402	chr1	61677249	61680277	10	12	NA
ENSMUSG00000025969	chr1	62703285	62818695	596	1063	Nrp2
ENSMUSG00000040865	chr1	62958418	63114667	535	889	Ino80d
ENSMUSG00000084799	chr1	63113078	63158290	192	299	Ino80dos
ENSMUSG00000101599	chr1	63117118	63126837	114	133	NA
ENSMUSG00000025968	chr1	63143596	63176833	643	1549	Ndufs1
ENSMUSG00000025967	chr1	63176825	63180486	66	187	Eef1b2
ENSMUSG00000025964	chr1	63445891	63596276	87	148	Adam23
ENSMUSG00000025962	chr1	63730614	63754655	42	96	Fastkd2
ENSMUSG00000025959	chr1	64029447	64122282	886	1568	Klf7
ENSMUSG00000025958	chr1	64532645	64604548	369	752	Creb1
ENSMUSG00000025956	chr1	64606473	64617242	24	41	Mettl21a
ENSMUSG00000070871	chr1	64690455	64725644	158	305	Ccnyl1
ENSMUSG00000045005	chr1	64730558	64737751	29	58	Fzd5
ENSMUSG00000051344	chr1	64785983	64956824	267	501	Plekhm3
ENSMUSG00000025950	chr1	65158616	65186500	152	297	Idh1
ENSMUSG00000025949	chr1	65186683	65278695	175	390	Pikfyve
ENSMUSG00000015222	chr1	66175273	66442583	140	280	Map2
ENSMUSG00000055567	chr1	66468367	66699148	25	29	Unc80
ENSMUSG00000026005	chr1	66700831	66719805	63	108	Rpe
ENSMUSG00000026004	chr1	66719248	66817562	587	1102	Kansl1l
ENSMUSG00000102559	chr1	66765626	66768731	19	45	NA
ENSMUSG00000102374	chr1	66769290	66771866	11	19	NA
ENSMUSG00000103706	chr1	66793645	66796298	30	31	NA
ENSMUSG00000103756	chr1	66799659	66800797	13	24	NA
ENSMUSG00000103553	chr1	66821226	66825914	13	29	NA
ENSMUSG00000026003	chr1	66830839	66863277	769	1733	Acadl
ENSMUSG00000061816	chr1	66924295	66945404	26	82	Myl1
ENSMUSG00000026000	chr1	67000517	67038872	67	137	Lancl1
ENSMUSG00000062209	chr1	68032186	69108059	2730	4846	Erbb4
ENSMUSG00000087514	chr1	69091913	69106740	115	218	NA
ENSMUSG00000025997	chr1	69531214	69687245	210	399	Ikzf2
ENSMUSG00000026196	chr1	71027498	71103146	33	38	Bard1
ENSMUSG00000050296	chr1	71242276	71414910	14	36	Abca12
ENSMUSG00000026192	chr1	71557150	71579631	42	87	Atic
ENSMUSG00000026193	chr1	71585520	71653200	328	783	Fn1
ENSMUSG00000039395	chr1	72159442	72212307	109	215	Mreg
ENSMUSG00000094655	chr1	72226240	72226430	233	503	NA
ENSMUSG00000093843	chr1	72255008	72255198	800	1765	NA
ENSMUSG00000026189	chr1	72259167	72284314	28	48	Pecr
ENSMUSG00000026187	chr1	72307427	72394952	81	142	Xrcc5
ENSMUSG00000039354	chr1	72583251	72633134	103	212	Smarcal1
ENSMUSG00000046330	chr1	72711290	72713813	18	72	Rpl37a
ENSMUSG00000026185	chr1	72857932	72874884	384	925	Igfbp5
ENSMUSG00000101968	chr1	72984844	73025507	36	56	1700027A15Rik
ENSMUSG00000100301	chr1	73618088	73864466	35	53	6030407O03Rik
ENSMUSG00000101344	chr1	73750321	73841917	18	29	NA
ENSMUSG00000055322	chr1	73910231	74124449	8692	13651	Tns1
ENSMUSG00000061815	chr1	74125541	74148223	10	21	Rufy4
ENSMUSG00000006304	chr1	74236084	74268209	354	664	Arpc2
ENSMUSG00000006299	chr1	74279840	74284738	71	154	Aamp
ENSMUSG00000026179	chr1	74284930	74353694	340	568	Pnkd
ENSMUSG00000006301	chr1	74288247	74305622	165	264	Tmbim1
ENSMUSG00000099931	chr1	74295603	74298867	19	27	NA
ENSMUSG00000026177	chr1	74375195	74386062	15	18	Slc11a1
ENSMUSG00000026176	chr1	74391509	74397285	180	280	Ctdsp1
ENSMUSG00000033364	chr1	74435511	74544284	131	278	Usp37
ENSMUSG00000026174	chr1	74506058	74530842	97	224	Cnot9
ENSMUSG00000026135	chr1	74565127	74588246	96	250	Zfp142
ENSMUSG00000026172	chr1	74588289	74592443	39	43	Bcs1l
ENSMUSG00000026171	chr1	74593748	74601397	44	69	Rnf25
ENSMUSG00000033276	chr1	74601445	74636894	17	16	Stk36
ENSMUSG00000033257	chr1	74661745	74703730	181	335	Ttll4
ENSMUSG00000026170	chr1	74713574	74737892	122	225	Cyp27a1
ENSMUSG00000006542	chr1	74738922	74749221	14	13	Prkag3
ENSMUSG00000026162	chr1	74967139	75125200	74	120	Nhej1
ENSMUSG00000033159	chr1	75134554	75142711	47	101	Cnppd1
ENSMUSG00000049339	chr1	75142778	75147913	57	103	Retreg2
ENSMUSG00000026197	chr1	75168646	75171629	19	28	Zfand2b
ENSMUSG00000026198	chr1	75171717	75180392	33	78	Abcb6
ENSMUSG00000099519	chr1	75171731	75185146	132	253	NA
ENSMUSG00000033124	chr1	75180860	75192196	188	356	Atg9a
ENSMUSG00000026199	chr1	75192151	75199387	48	76	Ankzf1
ENSMUSG00000026200	chr1	75198236	75210813	17	27	Glb1l
ENSMUSG00000026201	chr1	75210838	75215606	29	72	Stk16
ENSMUSG00000026202	chr1	75214228	75219865	486	1117	Tuba4a
ENSMUSG00000026203	chr1	75236406	75245692	185	282	Dnajb2
ENSMUSG00000026204	chr1	75247027	75264502	18	15	Ptprn
ENSMUSG00000026209	chr1	75307896	75317990	46	112	Dnpep
ENSMUSG00000026208	chr1	75360329	75368579	1979	3477	Des
ENSMUSG00000085653	chr1	75368212	75375012	18	30	Gm15179
ENSMUSG00000026207	chr1	75375297	75432320	1761	2607	Speg
ENSMUSG00000033021	chr1	75435930	75443179	66	131	Gmppa
ENSMUSG00000032997	chr1	75474569	75479307	39	73	Chpf
ENSMUSG00000026211	chr1	75479310	75506452	275	568	Obsl1
ENSMUSG00000032968	chr1	75507077	75510366	50	85	Inha
ENSMUSG00000026213	chr1	75521529	75537335	49	75	Stk11ip
ENSMUSG00000006576	chr1	75546266	75562172	615	1065	Slc4a3
ENSMUSG00000026235	chr1	77367185	77515088	513	985	Epha4
ENSMUSG00000026245	chr1	78417975	78488897	221	430	Farsb
ENSMUSG00000104018	chr1	78465448	78466926	12	14	NA
ENSMUSG00000032883	chr1	78657825	78707743	53	117	Acsl3
ENSMUSG00000079470	chr1	78658038	78671512	19	44	Utp14b
ENSMUSG00000073643	chr1	79702262	79776143	160	268	Wdfy1
ENSMUSG00000026248	chr1	79776018	79781445	29	77	Mrpl44
ENSMUSG00000026249	chr1	79794197	79861180	70	103	Serpine2
ENSMUSG00000043230	chr1	80198706	80218473	13	23	Fam124b
ENSMUSG00000004364	chr1	80264923	80340480	591	1124	Cul3
ENSMUSG00000103076	chr1	80274731	80276413	19	31	NA
ENSMUSG00000038608	chr1	80501073	80758527	209	408	Dock10
ENSMUSG00000054976	chr1	81076950	81341764	12	15	Nyap2
ENSMUSG00000055980	chr1	82233101	82291416	585	1041	Irs1
ENSMUSG00000026142	chr1	82316452	82445366	158	308	Rhbdd1
ENSMUSG00000067158	chr1	82448423	82586849	178	350	Col4a4
ENSMUSG00000079465	chr1	82586921	82722059	274	447	Col4a3
ENSMUSG00000065055	chr1	82635013	82635110	162	233	NA
ENSMUSG00000026150	chr1	82724890	82752394	280	597	Mff
ENSMUSG00000101450	chr1	82739691	82740707	10	21	NA
ENSMUSG00000026159	chr1	82839483	82901182	332	662	Agfg1
ENSMUSG00000026163	chr1	83254139	83408200	21	49	Sphkap
ENSMUSG00000045658	chr1	84036296	84364180	1050	1935	Pid1
ENSMUSG00000102750	chr1	84132867	84134510	10	13	NA
ENSMUSG00000036766	chr1	84369839	84696221	16	19	Dner
ENSMUSG00000026219	chr1	84721189	84840516	1062	2087	Trip12
ENSMUSG00000103505	chr1	84807158	84809190	12	38	NA
ENSMUSG00000104503	chr1	84819968	84824683	34	47	NA
ENSMUSG00000073633	chr1	84839841	84900487	31	50	Fbxo36
ENSMUSG00000026220	chr1	84905898	84935134	14	11	Slc16a14
ENSMUSG00000070034	chr1	85576899	85598817	25	39	Sp110
ENSMUSG00000026222	chr1	85649988	85709998	425	773	Sp100
ENSMUSG00000052760	chr1	85717083	85778643	65	100	A630001G21Rik
ENSMUSG00000036707	chr1	85793441	85851576	428	888	Cab39
ENSMUSG00000026223	chr1	85894281	85908675	123	263	Itm2c
ENSMUSG00000026224	chr1	85928483	85940624	12	11	4933407L21Rik
ENSMUSG00000026229	chr1	86064387	86139151	322	570	Psmd1
ENSMUSG00000077274	chr1	86087301	86087422	11	12	Gm22786
ENSMUSG00000094638	chr1	86133637	86162788	64	85	NA
ENSMUSG00000062590	chr1	86154780	86278284	84	173	Armc9
ENSMUSG00000026234	chr1	86344719	86359400	595	1209	Ncl
ENSMUSG00000064837	chr1	86351169	86351301	17	50	Snora75
ENSMUSG00000104627	chr1	86351981	86352127	263	609	Mir3535
ENSMUSG00000064696	chr1	86352008	86352087	263	608	NA
ENSMUSG00000026238	chr1	86526726	86530712	74	123	Ptma
ENSMUSG00000026239	chr1	86542994	86582629	194	336	Pde6d
ENSMUSG00000026240	chr1	86582904	86609375	76	153	Cops7b
ENSMUSG00000053333	chr1	86703808	87050095	410	749	Dis3l2
ENSMUSG00000026254	chr1	87213914	87240488	193	329	Eif4e2
ENSMUSG00000026255	chr1	87264363	87310839	14	22	Efhd1
ENSMUSG00000048000	chr1	87326998	87450796	610	1104	Gigyf2
ENSMUSG00000026288	chr1	87620312	87720507	221	435	Inpp5d
ENSMUSG00000026289	chr1	87755870	87792428	261	560	Atg16l1
ENSMUSG00000087968	chr1	87776938	87777209	81	175	Gm25395
ENSMUSG00000089281	chr1	87784556	87784820	24	55	Scarna6
ENSMUSG00000056055	chr1	87803680	87845158	15	12	Sag
ENSMUSG00000070738	chr1	87853287	87945180	565	1056	Dgkd
ENSMUSG00000103591	chr1	87897540	87900532	27	43	NA
ENSMUSG00000005501	chr1	87945119	88008551	240	490	Usp40
ENSMUSG00000090165	chr1	88055388	88219004	78	127	Ugt1a10
ENSMUSG00000090175	chr1	88070800	88218997	78	127	Ugt1a9
ENSMUSG00000089675	chr1	88087813	88219004	78	127	Ugt1a8
ENSMUSG00000090124	chr1	88095062	88220002	78	128	Ugt1a7c
ENSMUSG00000090145	chr1	88103252	88219003	71	115	Ugt1a6b
ENSMUSG00000054545	chr1	88134809	88218997	51	94	Ugt1a6a
ENSMUSG00000089943	chr1	88166012	88218997	24	51	Ugt1a5
ENSMUSG00000044783	chr1	88262471	88277633	165	402	A730008H23Rik
ENSMUSG00000044783	chr1	88262471	88277633	165	402	Hjurp
ENSMUSG00000049866	chr1	88673125	88702221	39	55	Arl4c
ENSMUSG00000036206	chr1	89070415	89155068	313	562	Sh3bp4
ENSMUSG00000055013	chr1	89454806	89897617	2327	3876	Agap1
ENSMUSG00000104114	chr1	89483438	89485821	25	46	NA
ENSMUSG00000101662	chr1	89568765	89576602	40	48	NA
ENSMUSG00000067081	chr1	89950220	90014666	504	822	Asb18
ENSMUSG00000026301	chr1	90042132	90153401	15	12	Iqca
ENSMUSG00000044337	chr1	90203980	90216751	210	415	Ackr3
ENSMUSG00000034432	chr1	90602981	90613341	79	154	Cops8
ENSMUSG00000048126	chr1	90765923	90843971	348	738	Col6a3
ENSMUSG00000026305	chr1	90998737	91128944	1593	2542	Lrrfip1
ENSMUSG00000034353	chr1	91179822	91225196	43	90	Ramp1
ENSMUSG00000034343	chr1	91250304	91290337	174	303	Ube2f
ENSMUSG00000026307	chr1	91298338	91321075	82	142	Scly
ENSMUSG00000026308	chr1	91351016	91362416	81	127	Klhl30
ENSMUSG00000026309	chr1	91373861	91398815	188	349	Ilkap
ENSMUSG00000067071	chr1	91411483	91414038	12	30	Hes6
ENSMUSG00000055866	chr1	91415982	91459324	454	765	Per2
ENSMUSG00000034292	chr1	91494647	91529307	84	154	Traf3ip1
ENSMUSG00000026311	chr1	91540544	91559589	71	132	Asb1
ENSMUSG00000007805	chr1	91801461	91848028	21	35	Twist2
ENSMUSG00000026313	chr1	91928779	92195699	1572	2648	Hdac4
ENSMUSG00000102565	chr1	92019592	92022097	11	15	NA
ENSMUSG00000026260	chr1	92439010	92473860	576	1089	Ndufa10
ENSMUSG00000073616	chr1	92637145	92641985	33	98	Cops9
ENSMUSG00000034220	chr1	92831645	92860779	1149	2017	Gpc1
ENSMUSG00000047067	chr1	92906981	92908435	18	27	Dusp28
ENSMUSG00000026269	chr1	92910783	92924384	144	259	Rnpepl1
ENSMUSG00000026270	chr1	92934376	92947941	31	47	Capn10
ENSMUSG00000026271	chr1	92950865	92986391	10	15	Gpr35
ENSMUSG00000014602	chr1	93015464	93101951	38	58	Kif1a
ENSMUSG00000047793	chr1	93235841	93301065	269	466	Sned1
ENSMUSG00000026273	chr1	93299211	93305915	24	44	Mterf4
ENSMUSG00000026275	chr1	93342854	93373489	52	146	Ppp1r7
ENSMUSG00000034088	chr1	93405940	93478815	993	2184	Hdlbp
ENSMUSG00000026276	chr1	93478964	93510260	333	670	Septin2
ENSMUSG00000116048	chr1	93478993	93509733	333	669	Septin2
ENSMUSG00000034066	chr1	93512079	93621976	289	519	Farp2
ENSMUSG00000026277	chr1	93619751	93658659	206	366	Stk25
ENSMUSG00000026278	chr1	93685660	93695764	16	21	Bok
ENSMUSG00000026279	chr1	93701935	93754864	152	225	Thap4
ENSMUSG00000026280	chr1	93751500	93790610	176	303	Atg4b
ENSMUSG00000026281	chr1	93792576	93801934	36	66	Dtymk
ENSMUSG00000026283	chr1	93803965	93822101	42	89	Ing5
ENSMUSG00000073609	chr1	93824909	93852348	79	141	D2hgdh
ENSMUSG00000073608	chr1	93990509	94017147	42	75	Gal3st2c
ENSMUSG00000051185	chr1	95313623	95335284	67	133	Fam174a
ENSMUSG00000040710	chr1	95587682	95667571	204	368	St8sia4
ENSMUSG00000044768	chr1	97606318	97662074	50	85	Macir
ENSMUSG00000040648	chr1	97706048	97770411	1172	2422	Ppip5k2
ENSMUSG00000026333	chr1	97770172	97793709	45	114	Gin1
ENSMUSG00000026335	chr1	97795114	98095646	2942	6048	Pam
ENSMUSG00000104140	chr1	97878382	97880065	26	33	NA
ENSMUSG00000089706	chr1	98031116	98057680	105	185	B230216N24Rik
ENSMUSG00000050840	chr1	104768529	104995481	98	216	Cdh20
ENSMUSG00000047496	chr1	105276914	105356710	146	274	Rnf152
ENSMUSG00000101214	chr1	105382260	105569139	142	237	NA
ENSMUSG00000056536	chr1	105518422	105663677	260	484	Pign
ENSMUSG00000026319	chr1	105663861	105755191	301	555	Relch
ENSMUSG00000026321	chr1	105780718	105847981	68	99	Tnfrsf11a
ENSMUSG00000099843	chr1	105979350	105990282	49	76	Gm7160
ENSMUSG00000038866	chr1	105990406	106034074	232	381	Zcchc2
ENSMUSG00000044340	chr1	106171752	106394250	1309	2354	Phlpp1
ENSMUSG00000103291	chr1	106219314	106224265	46	103	NA
ENSMUSG00000057329	chr1	106538178	106714274	456	822	Bcl2
ENSMUSG00000009905	chr1	106720459	106759727	99	197	Kdsr
ENSMUSG00000009907	chr1	106764071	106796728	159	320	Vps4b
ENSMUSG00000026315	chr1	107590006	107610484	17	53	Serpinb8
ENSMUSG00000100457	chr1	107917259	108028337	390	709	D830032E09Rik
ENSMUSG00000047216	chr1	110888326	110977584	103	229	Cdh19
ENSMUSG00000038702	chr1	111858702	111864918	21	49	Dsel
ENSMUSG00000097648	chr1	113891385	113964134	134	230	NA
ENSMUSG00000070695	chr1	115684756	116587323	12	25	Cntnap5a
ENSMUSG00000026374	chr1	118294778	118311739	141	243	Tsn
ENSMUSG00000026377	chr1	118321839	118333822	10	31	Nifk
ENSMUSG00000064302	chr1	118389058	118612678	2433	4445	Clasp1
ENSMUSG00000107722	chr1	118458652	118459267	223	709	2900060B14Rik
ENSMUSG00000080542	chr1	118459141	118459265	223	708	NA
ENSMUSG00000048402	chr1	118834132	119053619	347	572	Gli2
ENSMUSG00000004451	chr1	119470305	119504794	152	304	Ralb
ENSMUSG00000098447	chr1	119520090	119526359	16	12	NA
ENSMUSG00000098923	chr1	119526160	119528983	16	45	Tmem185b
ENSMUSG00000026383	chr1	119545037	119649000	116	208	Epb41l5
ENSMUSG00000026384	chr1	119652467	119837613	776	1418	Ptpn4
ENSMUSG00000103146	chr1	119790763	119798925	41	61	NA
ENSMUSG00000026385	chr1	120113280	120121078	58	146	Dbi
ENSMUSG00000026388	chr1	120121187	120188189	27	45	3110009E18Rik
ENSMUSG00000026389	chr1	120190757	120272705	276	471	Steap3
ENSMUSG00000003721	chr1	121304353	121332589	209	356	Insig2
ENSMUSG00000026339	chr1	121431049	121506460	231	414	Ccdc93
ENSMUSG00000001674	chr1	121553835	121567989	16	43	Ddx18
ENSMUSG00000036815	chr1	123321471	124846039	92	134	Dpp10
ENSMUSG00000026341	chr1	125392905	125435727	402	723	Actr3
ENSMUSG00000026342	chr1	125560595	125595820	468	885	Slc35f5
ENSMUSG00000026343	chr1	125676995	125873862	60	88	Gpr39
ENSMUSG00000049690	chr1	125913620	126830799	1745	2892	Nckap5
ENSMUSG00000036155	chr1	127205015	127488336	747	1236	Mgat5
ENSMUSG00000104378	chr1	127270524	127275285	21	22	NA
ENSMUSG00000026347	chr1	127486546	127679548	199	349	Tmem163
ENSMUSG00000102014	chr1	127753616	127774092	36	49	2900009J06Rik
ENSMUSG00000026349	chr1	127774164	127808061	493	905	Ccnt2
ENSMUSG00000036104	chr1	127868773	127943868	273	551	Rab3gap1
ENSMUSG00000036086	chr1	127954184	128103047	107	216	Zranb3
ENSMUSG00000056211	chr1	128103301	128237736	649	1187	R3hdm1
ENSMUSG00000102179	chr1	128143614	128146348	11	19	NA
ENSMUSG00000026353	chr1	128243964	128279378	234	393	Ubxn4
ENSMUSG00000026355	chr1	128331590	128359664	37	64	Mcm6
ENSMUSG00000026356	chr1	128363707	128417368	178	374	Dars
ENSMUSG00000045382	chr1	128588199	128592293	16	39	Cxcr4
ENSMUSG00000042581	chr1	129273302	130219278	62	84	Thsd7b
ENSMUSG00000086825	chr1	130429781	130437191	13	32	NA
ENSMUSG00000026399	chr1	130439027	130462744	66	107	Cd55
ENSMUSG00000085526	chr1	130462576	130557075	56	86	NA
ENSMUSG00000101904	chr1	130670209	130715799	672	1263	NA
ENSMUSG00000100257	chr1	130670261	130684071	30	79	NA
ENSMUSG00000026409	chr1	130689182	130729253	627	1156	Pfkfb2
ENSMUSG00000046404	chr1	130717327	130724358	56	115	Yod1
ENSMUSG00000016528	chr1	131053700	131097826	997	1651	Mapkapk2
ENSMUSG00000102856	chr1	131086252	131092149	91	159	NA
ENSMUSG00000026427	chr1	131153181	131187658	107	207	Eif2d
ENSMUSG00000026430	chr1	131176410	131245258	20	43	Rassf5
ENSMUSG00000042349	chr1	131254343	131279606	27	28	Ikbke
ENSMUSG00000026425	chr1	131285251	131527352	1063	1897	Srgap2
ENSMUSG00000101778	chr1	131406812	131409213	13	37	NA
ENSMUSG00000052688	chr1	131688695	131715439	37	77	Rab7b
ENSMUSG00000042251	chr1	131797381	131821473	19	20	Pm20d1
ENSMUSG00000013275	chr1	131827493	131848865	229	423	Slc41a1
ENSMUSG00000026433	chr1	131867224	131872887	26	34	Rab29
ENSMUSG00000026434	chr1	131910534	131936321	272	526	Nucks1
ENSMUSG00000100037	chr1	131962954	132014486	117	208	NA
ENSMUSG00000026435	chr1	131962967	131982969	59	80	Slc45a3
ENSMUSG00000026436	chr1	132007607	132032612	647	1097	Elk4
ENSMUSG00000026437	chr1	132112237	132139684	66	108	Cdk18
ENSMUSG00000042115	chr1	132298626	132307357	34	58	Klhdc8a
ENSMUSG00000009772	chr1	132316126	132333488	31	41	Nuak2
ENSMUSG00000100658	chr1	132342023	132349626	30	37	F730311O21Rik
ENSMUSG00000042066	chr1	132356315	132391281	118	227	Tmcc2
ENSMUSG00000042046	chr1	132417555	132466958	269	491	Dstyk
ENSMUSG00000097760	chr1	132466433	132477064	19	26	6030442K20Rik
ENSMUSG00000026439	chr1	132477365	132505659	116	230	Rbbp5
ENSMUSG00000053024	chr1	132509427	132543256	35	61	Cntn2
ENSMUSG00000026442	chr1	132564690	132741797	41	72	Nfasc
ENSMUSG00000026443	chr1	132880273	132940005	68	95	Lrrn2
ENSMUSG00000054387	chr1	132959484	133030561	605	1068	Mdm4
ENSMUSG00000026447	chr1	133045667	133108687	575	943	Pik3c2b
ENSMUSG00000101102	chr1	133050128	133068405	54	89	NA
ENSMUSG00000046062	chr1	133131143	133139783	107	216	Ppp1r15b
ENSMUSG00000041757	chr1	133164210	133303435	809	1496	Plekha6
ENSMUSG00000101693	chr1	133250398	133269808	31	52	Gm19461
ENSMUSG00000070643	chr1	133382303	133424377	347	547	Sox13
ENSMUSG00000090553	chr1	133603871	133610291	28	48	Snrpe
ENSMUSG00000102976	chr1	133619862	133661380	484	1118	Zc3h11a
ENSMUSG00000116275	chr1	133619871	133661380	484	1118	NA
ENSMUSG00000094410	chr1	133619940	133661318	484	1118	Zbed6
ENSMUSG00000026463	chr1	133699457	133801041	449	813	Atp2b4
ENSMUSG00000102509	chr1	133775210	133778421	10	14	NA
ENSMUSG00000041577	chr1	133910304	133921414	231	437	Prelp
ENSMUSG00000041559	chr1	134037254	134048277	48	83	Fmod
ENSMUSG00000020423	chr1	134075170	134079120	145	278	Btg2
ENSMUSG00000102380	chr1	134096405	134099159	11	14	NA
ENSMUSG00000042429	chr1	134199223	134235431	120	201	Adora1
ENSMUSG00000026458	chr1	134296783	134332928	22	39	Ppfia4
ENSMUSG00000042305	chr1	134346097	134361979	87	168	Tmem183a
ENSMUSG00000026456	chr1	134405559	134411740	80	102	Cyb5r1
ENSMUSG00000026457	chr1	134415378	134433351	349	672	Adipor1
ENSMUSG00000026455	chr1	134455531	134491018	107	181	Klhl12
ENSMUSG00000042229	chr1	134494648	134508774	51	84	Rabif
ENSMUSG00000042207	chr1	134560171	134635285	250	507	Kdm5b
ENSMUSG00000073557	chr1	134754658	134955942	2709	4610	Ppp1r12b
ENSMUSG00000103614	chr1	134799895	134801985	43	56	NA
ENSMUSG00000103976	chr1	134819916	134827549	140	223	NA
ENSMUSG00000042793	chr1	134983301	135105276	432	689	Lgr6
ENSMUSG00000026426	chr1	135146824	135156269	104	179	Arl8a
ENSMUSG00000041926	chr1	135262712	135284084	110	190	Rnpep
ENSMUSG00000062580	chr1	135295213	135313778	151	370	Timm17a
ENSMUSG00000048096	chr1	135324807	135368065	52	97	Lmod1
ENSMUSG00000041889	chr1	135371057	135375237	14	30	Shisa4
ENSMUSG00000041879	chr1	135382312	135430499	164	325	Ipo9
ENSMUSG00000009418	chr1	135434580	135688105	1080	1876	Nav1
ENSMUSG00000104524	chr1	135523088	135525338	14	17	NA
ENSMUSG00000026421	chr1	135720061	135752232	146	210	Csrp1
ENSMUSG00000041801	chr1	135766119	135769136	38	45	Phlda3
ENSMUSG00000041782	chr1	135818598	135833342	11	24	Lad1
ENSMUSG00000026414	chr1	135836354	135852260	11378	20123	Tnnt2
ENSMUSG00000051985	chr1	135953578	136006342	72	65	Igfn1
ENSMUSG00000026411	chr1	136008150	136035342	32	69	Tmem9
ENSMUSG00000041642	chr1	136131389	136177998	23	38	Kif21b
ENSMUSG00000041570	chr1	136268123	136346104	310	588	Camsap2
ENSMUSG00000026404	chr1	136415271	136440158	17	41	Ddx59
ENSMUSG00000041498	chr1	136466343	136531511	15	17	Kif14
ENSMUSG00000041483	chr1	136624901	136630053	51	98	Zfp281
ENSMUSG00000026398	chr1	136842571	136960448	43	61	Nr5a2
ENSMUSG00000098243	chr1	137898595	138000384	240	417	NA
ENSMUSG00000103427	chr1	137949422	137954643	17	28	NA
ENSMUSG00000026395	chr1	138062861	138175708	100	218	Ptprc
ENSMUSG00000026393	chr1	138482875	138620141	779	1484	Nek7
ENSMUSG00000102448	chr1	138567697	138571356	19	32	NA
ENSMUSG00000019230	chr1	138825186	138848577	44	69	Lhx9
ENSMUSG00000056268	chr1	138963435	139178960	1062	1702	Dennd1b
ENSMUSG00000104436	chr1	138968510	138971851	12	25	NA
ENSMUSG00000104900	chr1	138977656	138979246	14	19	4930596I21Rik
ENSMUSG00000102157	chr1	139030185	139032982	12	22	NA
ENSMUSG00000033964	chr1	139422288	139453005	116	251	Zbtb41
ENSMUSG00000033952	chr1	139454772	139494091	12	29	Aspm
ENSMUSG00000089991	chr1	139862957	139936477	23	45	NA
ENSMUSG00000085867	chr1	139939601	139994205	34	76	NA
ENSMUSG00000026365	chr1	140084708	140183764	499	1218	Cfh
ENSMUSG00000052726	chr1	140246158	140612067	673	1262	Kcnt2
ENSMUSG00000102698	chr1	140266487	140269852	16	28	NA
ENSMUSG00000026361	chr1	143598800	143702893	590	1120	Cdc73
ENSMUSG00000033849	chr1	143640664	143654614	12	23	B3galt2
ENSMUSG00000018196	chr1	143716338	143749676	65	137	Glrx2
ENSMUSG00000018199	chr1	143750790	143777068	83	169	Ro60
ENSMUSG00000018189	chr1	143777272	143807466	60	127	Uchl5
ENSMUSG00000100455	chr1	143777642	143781307	10	24	NA
ENSMUSG00000026360	chr1	143999338	144004161	55	116	Rgs2
ENSMUSG00000035131	chr1	146494760	146902472	12	18	Brinp3
ENSMUSG00000056220	chr1	149829618	149961290	82	154	Pla2g4a
ENSMUSG00000006010	chr1	150361305	150393080	111	211	Odr4
ENSMUSG00000006005	chr1	150392838	150449935	265	694	Tpr
ENSMUSG00000006014	chr1	150449412	150466165	18	79	Prg4
ENSMUSG00000066842	chr1	150562524	150993435	961	1798	Hmcn1
ENSMUSG00000100954	chr1	151339604	151345231	27	49	Gm10138
ENSMUSG00000023150	chr1	151344477	151364422	2244	4796	Ivns1abp
ENSMUSG00000052748	chr1	151367699	151428455	181	328	Swt1
ENSMUSG00000053286	chr1	151428542	151458161	186	300	Trmt1l
ENSMUSG00000103928	chr1	151445305	151447741	37	42	NA
ENSMUSG00000026484	chr1	151458004	151500955	131	308	Rnf2
ENSMUSG00000103238	chr1	151496557	151499585	18	27	NA
ENSMUSG00000026483	chr1	151571186	151721939	330	626	Niban1
ENSMUSG00000043019	chr1	151755371	151822051	309	443	Edem3
ENSMUSG00000032666	chr1	151852403	152090125	831	1439	1700025G04Rik
ENSMUSG00000014980	chr1	152370735	152386688	33	63	Tsen15
ENSMUSG00000032649	chr1	152399830	152510695	171	336	Colgalt2
ENSMUSG00000026482	chr1	152516760	152766351	766	1352	Rgl1
ENSMUSG00000008475	chr1	152766542	152775597	59	174	Arpc5
ENSMUSG00000026480	chr1	152800194	152836991	38	48	Ncf2
ENSMUSG00000042772	chr1	152836995	152902646	477	909	Smg7
ENSMUSG00000042751	chr1	152954993	153119261	18	31	Nmnat2
ENSMUSG00000026479	chr1	153122756	153186447	23	61	Lamc2
ENSMUSG00000026478	chr1	153218922	153332786	2041	3542	Lamc1
ENSMUSG00000103818	chr1	153283850	153287190	25	35	NA
ENSMUSG00000042699	chr1	153455758	153487660	169	429	Dhx9
ENSMUSG00000042684	chr1	153503015	153550045	14	19	Npl
ENSMUSG00000066800	chr1	153749426	153764221	21	61	Rnasel
ENSMUSG00000042641	chr1	153779381	153844142	45	17	Rgsl1
ENSMUSG00000045968	chr1	153849542	153900228	19	36	Teddm2
ENSMUSG00000099227	chr1	153899926	153900036	27	44	Mir8114
ENSMUSG00000026473	chr1	153899944	153909723	1175	2153	Glul
ENSMUSG00000004110	chr1	154390731	154884501	80	98	Cacna1e
ENSMUSG00000056708	chr1	155096361	155099636	101	182	Ier5
ENSMUSG00000026471	chr1	155127277	155146814	41	85	Mr1
ENSMUSG00000026470	chr1	155158715	155208256	193	351	Stx6
ENSMUSG00000033722	chr1	155212471	155244444	272	501	BC034090
ENSMUSG00000026469	chr1	155275701	155417415	498	896	Xpr1
ENSMUSG00000073535	chr1	155520173	155527143	150	304	Gm5532
ENSMUSG00000033701	chr1	155558120	155691330	171	355	Acbd6
ENSMUSG00000033684	chr1	155776029	155812889	226	370	Qsox1
ENSMUSG00000033671	chr1	155844964	155973255	556	1021	Cep350
ENSMUSG00000026466	chr1	156004599	156036480	451	809	Tor1aip1
ENSMUSG00000102964	chr1	156026223	156030007	47	78	NA
ENSMUSG00000050565	chr1	156035403	156068861	259	503	Tor1aip2
ENSMUSG00000078193	chr1	156366040	156366484	12	16	Gm2000
ENSMUSG00000026600	chr1	156424525	156474331	63	142	Soat1
ENSMUSG00000026596	chr1	156558786	156649568	441	758	Abl2
ENSMUSG00000104293	chr1	156583108	156588248	24	40	NA
ENSMUSG00000060519	chr1	156653617	156674356	70	115	Tor3a
ENSMUSG00000033557	chr1	156678532	156719086	223	356	Fam20b
ENSMUSG00000026594	chr1	156804166	156939626	108	202	Ralgps2
ENSMUSG00000033544	chr1	156838562	156861078	19	20	Angptl1
ENSMUSG00000070565	chr1	157135182	157412595	2197	3899	Rasal2
ENSMUSG00000102326	chr1	157347339	157350043	16	26	NA
ENSMUSG00000102391	chr1	157354474	157355650	15	36	NA
ENSMUSG00000103808	chr1	157404325	157406721	33	70	NA
ENSMUSG00000049881	chr1	157412352	157420236	38	84	2810025M15Rik
ENSMUSG00000033488	chr1	157458577	157492638	23	42	Cryzl2
ENSMUSG00000026589	chr1	157506728	157568425	48	84	Sec16b
ENSMUSG00000004031	chr1	158245269	158356326	12	26	Brinp2
ENSMUSG00000026587	chr1	158362273	158691781	45	77	Astn1
ENSMUSG00000040782	chr1	159232320	159347640	500	1022	Cop1
ENSMUSG00000103572	chr1	159235710	159238558	11	23	NA
ENSMUSG00000089536	chr1	159340283	159340422	14	53	NA
ENSMUSG00000105399	chr1	159340358	159340423	13	50	Mir1843b
ENSMUSG00000015829	chr1	159523769	159931729	65	89	Tnr
ENSMUSG00000073528	chr1	159614749	159684876	17	17	NA
ENSMUSG00000090394	chr1	160044382	160080208	167	348	4930523C07Rik
ENSMUSG00000026725	chr1	160085029	160153580	47	45	Tnn
ENSMUSG00000058267	chr1	160195215	160202170	20	61	Mrps14
ENSMUSG00000014226	chr1	160202367	160212875	36	96	Cacybp
ENSMUSG00000026721	chr1	160219174	160793211	1516	2653	Rabgap1l
ENSMUSG00000103693	chr1	160321686	160327078	20	30	NA
ENSMUSG00000104026	chr1	160570161	160573810	12	30	NA
ENSMUSG00000103391	chr1	160604115	160606190	18	34	NA
ENSMUSG00000103432	chr1	160608955	160612450	23	33	NA
ENSMUSG00000040423	chr1	160906418	160974978	696	1289	Rc3h1
ENSMUSG00000103343	chr1	160910789	160912619	31	30	NA
ENSMUSG00000103739	chr1	160915324	160918901	39	46	NA
ENSMUSG00000026715	chr1	160978585	161005863	11	17	Serpinc1
ENSMUSG00000043467	chr1	161002922	161034849	149	276	Zbtb37
ENSMUSG00000053332	chr1	161034422	161038539	160	394	Gas5
ENSMUSG00000064440	chr1	161035394	161035473	16	48	Gm26224
ENSMUSG00000080463	chr1	161035850	161035911	19	34	Gm22489
ENSMUSG00000064816	chr1	161036057	161036139	19	33	Gm22357
ENSMUSG00000065735	chr1	161037601	161037681	36	82	Snord80
ENSMUSG00000105780	chr1	161037604	161037680	36	82	NA
ENSMUSG00000065228	chr1	161038308	161038383	12	38	Gm25789
ENSMUSG00000026709	chr1	161040601	161070658	41	62	Dars2
ENSMUSG00000026708	chr1	161070713	161086724	10	18	Cenpl
ENSMUSG00000026705	chr1	161088375	161131511	85	148	Klhl20
ENSMUSG00000044835	chr1	161142691	161170498	14	22	Ankrd45
ENSMUSG00000026701	chr1	161240112	161251219	188	397	Prdx6
ENSMUSG00000040297	chr1	161816114	161876682	150	299	Suco
ENSMUSG00000026698	chr1	161969186	161973435	12	53	Pigc
ENSMUSG00000103393	chr1	161969200	162027106	23	79	NA
ENSMUSG00000040265	chr1	161982453	162478034	1044	1869	Dnm3
ENSMUSG00000078190	chr1	162217623	162225550	22	52	Dnm3os
ENSMUSG00000026694	chr1	162532127	162548551	24	43	Mettl13
ENSMUSG00000026696	chr1	162570515	162599084	118	201	Vamp4
ENSMUSG00000040225	chr1	162670725	162740556	524	1113	Prrc2c
ENSMUSG00000040181	chr1	162829561	162866610	324	604	Fmo1
ENSMUSG00000040170	chr1	162874317	162898726	294	570	Fmo2
ENSMUSG00000026586	chr1	163245119	163313710	438	743	Prrx1
ENSMUSG00000103195	chr1	163306798	163309067	17	15	NA
ENSMUSG00000040124	chr1	163384908	163403669	28	68	Gorab
ENSMUSG00000026585	chr1	163779583	163917109	191	366	Kifap3
ENSMUSG00000026584	chr1	163929100	163955126	58	123	Scyl3
ENSMUSG00000040918	chr1	164249046	164265385	35	79	Slc19a2
ENSMUSG00000026578	chr1	164275585	164287847	10	18	Ccdc181
ENSMUSG00000026577	chr1	164289800	164307489	47	80	Blzf1
ENSMUSG00000026575	chr1	164304121	164437725	102	155	Nme7
ENSMUSG00000026576	chr1	164437109	164458355	950	1829	Atp1b1
ENSMUSG00000026574	chr1	164796644	164824266	128	313	Dpt
ENSMUSG00000103659	chr1	164803969	164899591	18	23	NA
ENSMUSG00000040848	chr1	165174337	165194438	174	319	Sft2d2
ENSMUSG00000040843	chr1	165212286	165236996	132	226	Tiprl
ENSMUSG00000102302	chr1	165230371	165235125	51	61	NA
ENSMUSG00000040836	chr1	165295789	165326745	26	43	Gpr161
ENSMUSG00000026571	chr1	165328698	165460475	710	1336	Dcaf6
ENSMUSG00000102401	chr1	165451555	165454629	22	40	NA
ENSMUSG00000026568	chr1	165460637	165481214	289	640	Mpc2
ENSMUSG00000026566	chr1	165592240	165634538	126	210	Mpzl1
ENSMUSG00000040723	chr1	165646516	165709757	1254	2148	Rcsd1
ENSMUSG00000040713	chr1	165763746	165775308	128	266	Creg1
ENSMUSG00000005763	chr1	165788681	165877277	57	142	Cd247
ENSMUSG00000026565	chr1	165865154	166002678	420	789	Pou2f1
ENSMUSG00000026564	chr1	166098148	166127922	170	280	Styxl2
ENSMUSG00000040612	chr1	166254139	166316823	30	35	Ildr2
ENSMUSG00000026563	chr1	166379097	166393621	50	103	Tada1
ENSMUSG00000040596	chr1	166384622	166409863	62	131	Pogk
ENSMUSG00000084093	chr1	166431705	166431875	13	15	NA
ENSMUSG00000060568	chr1	167001417	167091302	457	617	Fam78b
ENSMUSG00000026558	chr1	167222883	167285320	285	507	Uck2
ENSMUSG00000052428	chr1	167308378	167333978	94	229	Tmco1
ENSMUSG00000088246	chr1	167340369	167340424	261	548	NA
ENSMUSG00000026687	chr1	167349991	167368532	105	202	Aldh9a1
ENSMUSG00000026688	chr1	167371966	167393841	241	517	Mgst3
ENSMUSG00000015843	chr1	167598384	167639623	119	219	Rxrg
ENSMUSG00000052534	chr1	168119364	168432270	3663	6153	Pbx1
ENSMUSG00000103780	chr1	168335980	168337671	29	38	NA
ENSMUSG00000102594	chr1	168348534	168350808	25	60	NA
ENSMUSG00000026678	chr1	169655501	169695813	1674	3315	Rgs5
ENSMUSG00000038530	chr1	169741477	169747642	42	62	Rgs4
ENSMUSG00000026675	chr1	169949535	169969241	63	102	Hsd17b7
ENSMUSG00000026674	chr1	169972307	170110762	291	518	Ddr2
ENSMUSG00000026670	chr1	170141938	170174957	182	390	Uap1
ENSMUSG00000026667	chr1	170193420	170215397	177	357	Uhmk1
ENSMUSG00000102752	chr1	170298199	170306332	30	59	Gm7694
ENSMUSG00000038473	chr1	170302668	170589861	728	1116	Nos1ap
ENSMUSG00000038463	chr1	170644532	170682789	45	97	Olfml2b
ENSMUSG00000026663	chr1	170704674	170867771	1242	2406	Atf6
ENSMUSG00000026659	chr1	170873498	170885540	30	69	Dusp12
ENSMUSG00000026656	chr1	170958617	170976547	31	59	Fcgr2b
ENSMUSG00000059498	chr1	171051174	171064935	21	39	Fcgr3
ENSMUSG00000058076	chr1	171127165	171150603	707	1344	Sdhc
ENSMUSG00000038370	chr1	171173262	171196268	344	621	Pcp4l1
ENSMUSG00000005674	chr1	171216011	171222514	105	168	Tomm40l
ENSMUSG00000058715	chr1	171229572	171234365	25	65	Fcer1g
ENSMUSG00000013593	chr1	171234853	171251388	440	1193	Ndufs2
ENSMUSG00000052423	chr1	171270328	171276896	40	70	B4galt3
ENSMUSG00000062729	chr1	171275990	171281186	31	67	Ppox
ENSMUSG00000053483	chr1	171281945	171287991	42	81	Usp21
ENSMUSG00000062963	chr1	171288563	171295024	45	80	Ufc1
ENSMUSG00000103983	chr1	171320601	171326177	28	32	NA
ENSMUSG00000013973	chr1	171329145	171342331	143	171	Dedd
ENSMUSG00000013997	chr1	171338008	171345646	28	62	Nit1
ENSMUSG00000006412	chr1	171345670	171359254	55	104	Pfdn2
ENSMUSG00000048865	chr1	171388954	171410298	35	62	Arhgap30
ENSMUSG00000026641	chr1	171411313	171419142	67	117	Usf1
ENSMUSG00000038235	chr1	171437535	171464603	306	492	F11r
ENSMUSG00000091993	chr1	171500568	171504111	512	1446	NA
ENSMUSG00000094668	chr1	171503048	171503163	512	1446	NA
ENSMUSG00000015355	chr1	171682009	171705258	22	26	Cd48
ENSMUSG00000038147	chr1	171839697	171890718	23	41	Cd84
ENSMUSG00000026556	chr1	172000960	172028444	32	43	Vangl2
ENSMUSG00000003458	chr1	172066013	172082795	157	335	Ncstn
ENSMUSG00000026553	chr1	172082529	172122330	338	835	Copa
ENSMUSG00000003464	chr1	172126755	172136493	234	484	Pex19
ENSMUSG00000026554	chr1	172148084	172197005	642	1125	Dcaf8
ENSMUSG00000013698	chr1	172196728	172206804	169	328	Pea15a
ENSMUSG00000007122	chr1	172209894	172219868	140	244	Casq1
ENSMUSG00000038034	chr1	172261641	172319841	55	69	Igsf8
ENSMUSG00000007097	chr1	172271709	172298064	1816	3310	Atp1a2
ENSMUSG00000044708	chr1	172341210	172374085	11	23	Kcnj10
ENSMUSG00000050229	chr1	172376546	172384099	60	107	Pigm
ENSMUSG00000037995	chr1	172481788	172498878	18	19	Igsf9
ENSMUSG00000026547	chr1	172500047	172507380	223	363	Tagln2
ENSMUSG00000049598	chr1	172555938	172563717	20	33	Vsig8
ENSMUSG00000026544	chr1	172630764	172632962	25	31	Dusp23
ENSMUSG00000005338	chr1	173333258	173367695	16	32	Cadm3
ENSMUSG00000037860	chr1	173350879	173466040	22	38	Aim2
ENSMUSG00000073491	chr1	173566283	173599274	13	21	Ifi213
ENSMUSG00000073490	chr1	173723427	173741747	51	115	Ifi207
ENSMUSG00000073489	chr1	173747293	173766943	10	16	Ifi204
ENSMUSG00000090222	chr1	173776529	173798270	102	176	NA
ENSMUSG00000090272	chr1	173849126	173880881	118	222	Mndal
ENSMUSG00000026536	chr1	173896345	173913046	10	21	Ifi211
ENSMUSG00000039997	chr1	173920407	173942672	115	260	Ifi203
ENSMUSG00000054203	chr1	174011998	174031810	18	44	Ifi205
ENSMUSG00000026532	chr1	174172776	174248450	104	170	Spta1
ENSMUSG00000028354	chr1	174501825	174822729	29	45	Fmn2
ENSMUSG00000050069	chr1	174833785	174921819	17	19	Grem2
ENSMUSG00000026527	chr1	175059087	175492500	230	330	Rgs7
ENSMUSG00000026526	chr1	175600374	175625635	265	685	Fh1
ENSMUSG00000026525	chr1	175662421	175692776	52	118	Opn3
ENSMUSG00000078185	chr1	175682237	175692901	40	94	Chml
ENSMUSG00000055214	chr1	175962306	176275312	49	36	Pld5
ENSMUSG00000057335	chr1	176733653	176814067	280	585	Cep170
ENSMUSG00000026504	chr1	176814660	177020437	279	525	Sdccag8
ENSMUSG00000019699	chr1	177020073	177258203	1169	2185	Akt3
ENSMUSG00000103646	chr1	177168098	177170862	15	24	NA
ENSMUSG00000063659	chr1	177442351	177450764	115	221	Zbtb18
ENSMUSG00000015961	chr1	177762962	177796511	98	214	Adss
ENSMUSG00000091476	chr1	177983423	178172705	33	52	Catspere2
ENSMUSG00000026502	chr1	178187417	178257301	517	849	Desi2
ENSMUSG00000086350	chr1	178313328	178318549	34	48	NA
ENSMUSG00000026500	chr1	178319130	178322693	45	122	Cox20
ENSMUSG00000039630	chr1	178321108	178337797	687	1362	Hnrnpu
ENSMUSG00000026495	chr1	178406085	178484513	238	524	Efcab2
ENSMUSG00000026494	chr1	178529125	178939200	146	273	Kif26b
ENSMUSG00000055067	chr1	178951960	179518041	1127	1933	Smyd3
ENSMUSG00000026492	chr1	179528055	179546267	54	110	Tfb2m
ENSMUSG00000038949	chr1	179546370	179627478	528	856	Cnst
ENSMUSG00000038936	chr1	179668210	179687189	68	154	Sccpdh
ENSMUSG00000087236	chr1	179695297	179745271	18	21	Kif28
ENSMUSG00000026491	chr1	179744894	179803680	357	595	Ahctf1
ENSMUSG00000026490	chr1	179960472	180165603	831	1512	Cdc42bpa
ENSMUSG00000026489	chr1	180165238	180199602	740	1353	Coq8a
ENSMUSG00000010609	chr1	180227004	180263438	76	110	Psen2
ENSMUSG00000038855	chr1	180330485	180424802	2140	3371	Itpkb
ENSMUSG00000104388	chr1	180357649	180364998	205	343	NA
ENSMUSG00000103123	chr1	180372669	180373540	20	40	NA
ENSMUSG00000103772	chr1	180376444	180379514	82	107	NA
ENSMUSG00000053963	chr1	180432387	180483504	22	41	Stum
ENSMUSG00000026496	chr1	180568924	180601254	105	224	Parp1
ENSMUSG00000058729	chr1	180641150	180690694	40	69	Lin9
ENSMUSG00000026499	chr1	180726043	180754204	177	312	Acbd3
ENSMUSG00000060743	chr1	180800832	180813943	162	206	H3f3a
ENSMUSG00000038806	chr1	180851127	180868113	65	107	Sde2
ENSMUSG00000026520	chr1	180904293	180908088	20	35	Pycr2
ENSMUSG00000026519	chr1	180942344	180975112	127	237	Tmem63a
ENSMUSG00000038776	chr1	180976210	181020904	125	242	Ephx1
ENSMUSG00000026516	chr1	181087138	181144204	138	275	Nvl
ENSMUSG00000062169	chr1	181144693	181168994	102	242	Cnih4
ENSMUSG00000038733	chr1	181173228	181212001	800	1383	Wdr26
ENSMUSG00000004880	chr1	181815335	181843046	219	348	Lbr
ENSMUSG00000022995	chr1	181896384	182019990	1314	2061	Enah
ENSMUSG00000103722	chr1	181950132	181953375	34	48	NA
ENSMUSG00000103317	chr1	181967699	181969923	11	21	NA
ENSMUSG00000102950	chr1	181986336	181990204	27	52	NA
ENSMUSG00000102760	chr1	182006060	182007686	13	21	NA
ENSMUSG00000026511	chr1	182124737	182132407	27	56	Srp9
ENSMUSG00000038633	chr1	182275772	182282804	231	220	Degs1
ENSMUSG00000047539	chr1	182313102	182341629	155	298	Fbxo28
ENSMUSG00000026510	chr1	182409172	182462432	120	238	Trp53bp2
ENSMUSG00000026509	chr1	182467260	182517608	318	637	Capn2
ENSMUSG00000038576	chr1	182763860	182896591	19	33	Susd4
ENSMUSG00000079164	chr1	182954788	182976044	11	20	Tlr5
ENSMUSG00000030768	chr1	183086266	183221522	153	297	Disp1
ENSMUSG00000046836	chr1	183276352	183297269	129	245	Brox
ENSMUSG00000042901	chr1	183296590	183325476	140	254	Aida
ENSMUSG00000056050	chr1	183326725	183369553	189	411	Mia3
ENSMUSG00000072258	chr1	183388981	183410198	42	84	Taf1a
ENSMUSG00000039384	chr1	184013302	184075636	97	166	Dusp10
ENSMUSG00000039377	chr1	184727140	184732619	32	59	Hlx
ENSMUSG00000073481	chr1	184813068	184846451	127	222	Mtarc2
ENSMUSG00000039349	chr1	184871926	184883218	68	106	C130074G19Rik
ENSMUSG00000026620	chr1	184896789	184999570	104	205	Mark1
ENSMUSG00000039318	chr1	185204117	185286759	277	495	Rab3gap2
ENSMUSG00000026618	chr1	185284726	185329396	194	419	Iars2
ENSMUSG00000026617	chr1	185332149	185357777	76	154	Bpnt1
ENSMUSG00000026615	chr1	185363044	185428360	257	602	Eprs
ENSMUSG00000039246	chr1	186087731	186117310	11	31	Lyplal1
ENSMUSG00000039239	chr1	186622792	186705989	140	252	Tgfb2
ENSMUSG00000001305	chr1	186720978	186749358	33	62	Rrp15
ENSMUSG00000026611	chr1	187044648	187215465	30	59	Spata17
ENSMUSG00000039210	chr1	187215508	187351704	405	809	Gpatch2
ENSMUSG00000104394	chr1	187236457	187240357	13	32	NA
ENSMUSG00000026610	chr1	187608791	188214885	3392	5545	Esrrg
ENSMUSG00000103961	chr1	187616852	187651824	15	29	NA
ENSMUSG00000026609	chr1	188262023	188965041	24	31	Ush2a
ENSMUSG00000026608	chr1	188971095	189007841	161	266	Kctd3
ENSMUSG00000037624	chr1	189207930	189402273	41	102	Kcnk2
ENSMUSG00000026605	chr1	189640606	189688086	29	45	Cenpf
ENSMUSG00000026604	chr1	189728268	189876695	751	1171	Ptpn14
ENSMUSG00000026603	chr1	189880492	189922363	359	534	Smyd2
ENSMUSG00000103467	chr1	189913339	189915959	28	32	NA
ENSMUSG00000010175	chr1	190118035	190170714	389	632	Prox1
ENSMUSG00000079045	chr1	190170296	190217276	10	28	Prox1os
ENSMUSG00000089872	chr1	190700202	190911770	318	565	Rps6kc1
ENSMUSG00000026634	chr1	190925112	190946962	120	210	Angel2
ENSMUSG00000066595	chr1	191005847	191026158	39	100	Flvcr1
ENSMUSG00000026632	chr1	191045826	191062932	81	132	Tatdn3
ENSMUSG00000026628	chr1	191170296	191218039	58	74	Atf3
ENSMUSG00000037499	chr1	191306789	191318194	81	112	Nenf
ENSMUSG00000026627	chr1	191325912	191350914	30	58	Pacc1
ENSMUSG00000026626	chr1	191351975	191403272	473	892	Ppp2r5a
ENSMUSG00000037461	chr1	191575636	191623688	101	243	Ints7
ENSMUSG00000026623	chr1	191717834	191784255	563	1048	Lpgat1
ENSMUSG00000037434	chr1	191906767	191913247	100	180	Slc30a1
ENSMUSG00000026637	chr1	191997205	192092559	115	208	Traf5
ENSMUSG00000037395	chr1	192098546	192138062	390	675	Rcor3
ENSMUSG00000097316	chr1	192136896	192151026	69	113	Gm10516
ENSMUSG00000058248	chr1	192190774	192510159	17	30	Kcnh1
ENSMUSG00000037375	chr1	192496711	192771223	264	465	Hhat
ENSMUSG00000094131	chr1	192745571	192745686	13	17	NA
ENSMUSG00000016262	chr1	192844488	192855756	34	70	Sertad4
ENSMUSG00000016181	chr1	193091104	193130272	66	123	Utp25
ENSMUSG00000079144	chr1	193168046	193177832	16	42	A130010J15Rik
ENSMUSG00000026639	chr1	193207699	193343878	81	138	Lamb3
ENSMUSG00000016194	chr1	193221634	193264075	24	48	Hsd11b1
ENSMUSG00000009633	chr1	193272161	193273217	38	77	G0s2
ENSMUSG00000104348	chr1	193281271	193283843	11	27	NA
ENSMUSG00000026640	chr1	194618218	194816869	1262	2346	Plxna2
ENSMUSG00000102523	chr1	194650319	194652174	28	48	NA
ENSMUSG00000102621	chr1	194669673	194671506	15	34	NA
ENSMUSG00000102841	chr1	194677002	194680565	39	48	NA
ENSMUSG00000016494	chr1	194938819	194961279	339	791	Cd34
ENSMUSG00000096929	chr1	194976375	195037904	1079	1858	A330023F24Rik
ENSMUSG00000104525	chr1	194993258	194996195	44	94	NA
ENSMUSG00000103867	chr1	195013746	195016448	34	34	NA
ENSMUSG00000016493	chr1	195036826	195092249	94	167	Cd46
ENSMUSG00000104010	chr1	195042383	195044679	10	11	NA
ENSMUSG00000016481	chr1	195097382	195131586	239	417	Cr1l
ENSMUSG00000050530	chr2	3114224	3227806	461	898	Fam171a1
ENSMUSG00000026643	chr2	3284212	3328877	158	341	Nmt2
ENSMUSG00000026648	chr2	3424131	3464130	78	166	Dclre1c
ENSMUSG00000109865	chr2	3488850	3512814	49	142	Hspa14
ENSMUSG00000051396	chr2	3504527	3512790	21	49	Hspa14
ENSMUSG00000051396	chr2	3504527	3512790	21	49	Gm45902
ENSMUSG00000039496	chr2	3513030	3526376	28	61	Cdnf
ENSMUSG00000026655	chr2	3570488	3782142	121	179	Fam107b
ENSMUSG00000026657	chr2	4017717	4614043	671	1035	Frmd4a
ENSMUSG00000039449	chr2	4622058	4652113	152	253	Prpf18
ENSMUSG00000048186	chr2	4717831	4802142	141	286	Bend7
ENSMUSG00000026662	chr2	4881564	4910557	82	173	Sephs1
ENSMUSG00000026664	chr2	4919019	4938730	204	635	Phyh
ENSMUSG00000026672	chr2	5020642	5064051	155	290	Optn
ENSMUSG00000026676	chr2	5137776	5230878	45	79	Ccdc3
ENSMUSG00000039145	chr2	5293457	5714515	53071	105553	Camk1d
ENSMUSG00000039128	chr2	5794294	5845164	181	350	Cdc123
ENSMUSG00000025817	chr2	5845019	5871895	47	97	Nudt5
ENSMUSG00000025816	chr2	5870987	5895432	159	280	Sec61a2
ENSMUSG00000025815	chr2	5896115	5942792	76	134	Dhtkd1
ENSMUSG00000043241	chr2	5951469	6056703	207	399	Upf2
ENSMUSG00000045319	chr2	6097607	6130211	41	113	Proser2
ENSMUSG00000039063	chr2	6188465	6213033	32	68	Echdc3
ENSMUSG00000039046	chr2	6322667	6446390	254	458	Usp6nl
ENSMUSG00000002107	chr2	6539694	7509563	5843	10480	Celf2
ENSMUSG00000075538	chr2	6932541	6935081	44	81	NA
ENSMUSG00000062319	chr2	6950453	6951680	32	45	NA
ENSMUSG00000065824	chr2	7076094	7076414	13	16	NA
ENSMUSG00000015619	chr2	9857078	9890034	130	96	Gata3
ENSMUSG00000025782	chr2	9914552	10048596	278	530	Taf3
ENSMUSG00000025781	chr2	10056016	10080510	805	1754	Atp5c1
ENSMUSG00000037262	chr2	10080593	10092806	62	126	Kin
ENSMUSG00000025780	chr2	10153571	10256529	85	158	Itih5
ENSMUSG00000061186	chr2	10370510	10595253	35	46	Sfmbt2
ENSMUSG00000026778	chr2	11172108	11301222	37	57	Prkcq
ENSMUSG00000026773	chr2	11471433	11554077	176	255	Pfkfb3
ENSMUSG00000037197	chr2	11585437	11604153	48	133	Rbm17
ENSMUSG00000026770	chr2	11642807	11693193	11	20	Il2ra
ENSMUSG00000023206	chr2	11705290	11734317	338	534	Il15ra
ENSMUSG00000058594	chr2	11742573	11777582	339	563	Fbh1
ENSMUSG00000047909	chr2	11777876	11790329	106	166	Ankrd16
ENSMUSG00000026768	chr2	12106632	12301922	126	234	Itga8
ENSMUSG00000026767	chr2	12347263	12419470	217	373	Mindy3
ENSMUSG00000026730	chr2	12924041	13003455	84	174	Pter
ENSMUSG00000026727	chr2	13076821	13271415	768	1431	Rsu1
ENSMUSG00000103360	chr2	13116176	13118435	11	27	NA
ENSMUSG00000026726	chr2	13276338	13491813	40	108	Cubn
ENSMUSG00000026723	chr2	13509014	13544668	61	115	Trdmt1
ENSMUSG00000026728	chr2	13573927	13582826	284	770	Vim
ENSMUSG00000003418	chr2	13651021	13794064	92	148	St8sia6
ENSMUSG00000063275	chr2	13850282	14056135	194	359	Hacd1
ENSMUSG00000103926	chr2	14037825	14040423	10	24	NA
ENSMUSG00000026718	chr2	14074098	14149634	187	322	Stam
ENSMUSG00000026712	chr2	14229392	14332057	246	532	Mrc1
ENSMUSG00000057914	chr2	14603088	14987908	2690	4743	Cacnb2
ENSMUSG00000103885	chr2	14707665	14710338	17	15	NA
ENSMUSG00000102673	chr2	14944908	14946844	17	26	NA
ENSMUSG00000104271	chr2	14966198	14967523	10	26	NA
ENSMUSG00000026707	chr2	14995131	15055069	43	86	Nsun6
ENSMUSG00000017418	chr2	15049395	15082456	185	347	Arl5b
ENSMUSG00000102258	chr2	15056713	15059473	12	29	NA
ENSMUSG00000026748	chr2	16356304	16755839	734	1459	Plxdc2
ENSMUSG00000053702	chr2	17343909	17731464	1673	3168	Nebl
ENSMUSG00000054074	chr2	18040676	18049051	19	34	Skida1
ENSMUSG00000026743	chr2	18055237	18212388	1626	2696	Mllt10
ENSMUSG00000026740	chr2	18195654	18392830	714	1266	Dnajc1
ENSMUSG00000051154	chr2	18672384	18676231	45	122	Commd3
ENSMUSG00000026739	chr2	18677018	18686629	96	225	Bmi1
ENSMUSG00000092353	chr2	18742715	18760862	30	48	Gm3363
ENSMUSG00000026737	chr2	18842255	18998126	562	969	Pip4k2a
ENSMUSG00000023094	chr2	19371440	19394976	95	152	Msrb2
ENSMUSG00000043415	chr2	19657752	19660583	47	98	Otud1
ENSMUSG00000036617	chr2	19909780	20810713	1753	3038	Etl4
ENSMUSG00000036591	chr2	20847919	20968881	1144	2117	Arhgap21
ENSMUSG00000085206	chr2	20921860	20931389	64	92	NA
ENSMUSG00000075514	chr2	20969054	20969997	32	28	Gm13375
ENSMUSG00000048550	chr2	21205724	21215009	11	42	Thnsl1
ENSMUSG00000045967	chr2	21367542	21830547	28	32	Gpr158
ENSMUSG00000083863	chr2	22587291	22587962	16	44	NA
ENSMUSG00000083563	chr2	22588103	22589647	76	179	NA
ENSMUSG00000026787	chr2	22622205	22693874	13	22	Gad2
ENSMUSG00000026786	chr2	22774094	22875653	108	223	Apbb1ip
ENSMUSG00000026784	chr2	22895522	22940266	186	333	Pdss1
ENSMUSG00000058835	chr2	22940073	23040241	720	1244	Abi1
ENSMUSG00000026781	chr2	23068167	23115558	189	347	Acbd5
ENSMUSG00000026775	chr2	23156369	23199260	291	629	Yme1l1
ENSMUSG00000026771	chr2	23506220	23572106	289	543	Spopl
ENSMUSG00000026986	chr2	24002910	24049394	17	34	Hnmt
ENSMUSG00000026979	chr2	24367580	24414954	17	29	Psd4
ENSMUSG00000004113	chr2	24603887	24763152	28	32	Cacna1b
ENSMUSG00000036893	chr2	24789928	24919614	883	1399	Ehmt1
ENSMUSG00000103162	chr2	24874532	24876329	16	29	NA
ENSMUSG00000102875	chr2	24889448	24893866	14	29	NA
ENSMUSG00000026972	chr2	24925352	24935252	34	50	Arrdc1
ENSMUSG00000026974	chr2	24949792	24962075	29	42	Zmynd19
ENSMUSG00000026975	chr2	24962400	24972163	24	24	Dph7
ENSMUSG00000036833	chr2	24976033	25054057	214	386	Pnpla7
ENSMUSG00000006476	chr2	25054355	25062881	101	146	Nsmf
ENSMUSG00000078202	chr2	25180758	25183339	41	58	Nrarp
ENSMUSG00000013465	chr2	25199712	25211489	81	142	Nelfb
ENSMUSG00000036752	chr2	25222160	25224702	75	184	Tubb4b
ENSMUSG00000115018	chr2	25244819	25246863	11	12	NA
ENSMUSG00000006471	chr2	25244821	25256022	43	89	Ndor1
ENSMUSG00000115074	chr2	25244863	25255386	43	89	Ndor1
ENSMUSG00000026966	chr2	25271039	25272438	16	36	Ssna1
ENSMUSG00000026965	chr2	25272478	25285915	134	194	Anapc2
ENSMUSG00000026959	chr2	25291181	25319187	17	27	Grin1
ENSMUSG00000036646	chr2	25332338	25352212	104	176	Man1b1
ENSMUSG00000026958	chr2	25352276	25356359	10	15	Dpp7
ENSMUSG00000026956	chr2	25359889	25365682	11	27	Uap1l1
ENSMUSG00000026955	chr2	25372321	25378213	41	53	Sapcd2
ENSMUSG00000015085	chr2	25395874	25401321	33	93	Entpd2
ENSMUSG00000015094	chr2	25399351	25409494	80	169	Npdc1
ENSMUSG00000026944	chr2	25428703	25448540	259	393	Abca2
ENSMUSG00000047617	chr2	25455141	25461094	50	102	Paxx
ENSMUSG00000015090	chr2	25466709	25470046	295	520	Ptgds
ENSMUSG00000015095	chr2	25500750	25505471	149	221	Fbxw5
ENSMUSG00000026942	chr2	25517982	25546940	196	271	Traf2
ENSMUSG00000015092	chr2	25557847	25562082	41	89	Edf1
ENSMUSG00000026941	chr2	25563115	25574845	65	118	Mamdc4
ENSMUSG00000036504	chr2	25573430	25575224	33	69	Phpt1
ENSMUSG00000015087	chr2	25583018	25608521	331	556	Rabl6
ENSMUSG00000052403	chr2	25607892	25631761	16	22	NA
ENSMUSG00000026939	chr2	25620067	25622005	15	33	Tmem141
ENSMUSG00000058740	chr2	25863734	25918273	32	58	Kcnt1
ENSMUSG00000026933	chr2	25926838	25983282	346	566	Camsap1
ENSMUSG00000036352	chr2	25998543	26021747	308	535	Ubac1
ENSMUSG00000026932	chr2	26055535	26123220	315	509	Nacc2
ENSMUSG00000087679	chr2	26136814	26140521	191	265	Tmem250-ps
ENSMUSG00000036327	chr2	26208637	26237525	129	206	Qsox2
ENSMUSG00000026930	chr2	26315515	26348237	551	804	Gpsm1
ENSMUSG00000075467	chr2	26348121	26352110	40	69	Dnlz
ENSMUSG00000026928	chr2	26352176	26360918	12	11	Card9
ENSMUSG00000086779	chr2	26352645	26371952	21	23	NA
ENSMUSG00000036281	chr2	26362765	26380653	93	139	Snapc4
ENSMUSG00000026927	chr2	26382802	26389316	75	167	Entr1
ENSMUSG00000026926	chr2	26389339	26397122	162	326	Pmpca
ENSMUSG00000026925	chr2	26396249	26409203	54	105	Inpp5e
ENSMUSG00000026924	chr2	26409431	26445216	214	514	Sec16a
ENSMUSG00000086714	chr2	26445696	26459390	35	59	0610009E02Rik
ENSMUSG00000026923	chr2	26457903	26516663	440	849	Notch1
ENSMUSG00000026921	chr2	26580014	26593120	790	1351	Egfl7
ENSMUSG00000092356	chr2	26586639	26635634	845	1418	NA
ENSMUSG00000026922	chr2	26593057	26604417	108	221	Agpat2
ENSMUSG00000036186	chr2	26628457	26636497	31	76	Dipk1b
ENSMUSG00000077192	chr2	26639190	26639321	29	56	Snora17
ENSMUSG00000036160	chr2	26888628	26902879	42	67	Surf6
ENSMUSG00000015776	chr2	26905262	26910677	44	69	Med22
ENSMUSG00000062647	chr2	26910764	26913318	105	233	Rpl7a
ENSMUSG00000065258	chr2	26911261	26911334	24	40	Gm23969
ENSMUSG00000015790	chr2	26913381	26916530	17	43	Surf1
ENSMUSG00000014873	chr2	26916367	26920183	29	37	Surf2
ENSMUSG00000014867	chr2	26920040	26933928	240	400	Surf4
ENSMUSG00000052406	chr2	26953563	26964386	42	92	Rexo4
ENSMUSG00000015488	chr2	27009926	27021089	113	156	Cacfd1
ENSMUSG00000036040	chr2	27079379	27108981	223	404	Adamtsl2
ENSMUSG00000009614	chr2	27188393	27248337	29	73	Sardh
ENSMUSG00000009621	chr2	27262104	27427033	362	583	Vav2
ENSMUSG00000026918	chr2	27445579	27507662	237	409	Brd3
ENSMUSG00000026917	chr2	27515157	27536535	88	170	Wdr5
ENSMUSG00000080538	chr2	27539805	27539930	96	374	Gm25541
ENSMUSG00000015846	chr2	27676440	27762957	723	1007	Rxra
ENSMUSG00000026837	chr2	27886425	28039514	631	1096	Col5a1
ENSMUSG00000026833	chr2	28192992	28230736	45	91	Olfm1
ENSMUSG00000035772	chr2	28468066	28471178	50	84	Mrps2
ENSMUSG00000026821	chr2	28513125	28553081	73	92	Ralgds
ENSMUSG00000026816	chr2	28566311	28583751	40	69	Gtf3c5
ENSMUSG00000026812	chr2	28641228	28691167	189	335	Tsc1
ENSMUSG00000035666	chr2	28822299	28840360	71	151	Gtf3c4
ENSMUSG00000026806	chr2	28840406	28905571	70	125	Ddx31
ENSMUSG00000079502	chr2	28926949	29055066	123	92	Cfap77
ENSMUSG00000026803	chr2	29060262	29087656	64	111	Ttf1
ENSMUSG00000043535	chr2	29124181	29182471	259	589	Setx
ENSMUSG00000035513	chr2	29194541	29253005	143	204	Ntng2
ENSMUSG00000079499	chr2	29245107	29253006	44	56	6530402F18Rik
ENSMUSG00000026799	chr2	29346819	29524793	451	722	Med27
ENSMUSG00000039844	chr2	29619720	29740978	1778	2959	Rapgef1
ENSMUSG00000039826	chr2	29761224	29788502	60	113	Trub2
ENSMUSG00000026798	chr2	29787493	29797935	24	21	Coq4
ENSMUSG00000059316	chr2	29802634	29817522	105	132	Slc27a4
ENSMUSG00000069020	chr2	29820075	29845002	61	73	Urm1
ENSMUSG00000039787	chr2	29869164	29882840	37	70	Cercam
ENSMUSG00000026790	chr2	29889221	29931746	211	436	Odf2
ENSMUSG00000019715	chr2	29935426	29960371	83	178	Gle1
ENSMUSG00000057738	chr2	29965560	30031451	1199	2427	Sptan1
ENSMUSG00000039715	chr2	30031546	30048881	17	32	Dync2i2
ENSMUSG00000054766	chr2	30057378	30072577	97	192	Set
ENSMUSG00000026785	chr2	30077684	30091022	42	73	Pkn3
ENSMUSG00000039686	chr2	30097283	30124585	156	275	Zer1
ENSMUSG00000039678	chr2	30133746	30152013	124	163	Tbc1d13
ENSMUSG00000015337	chr2	30171493	30174069	40	95	Endog
ENSMUSG00000039660	chr2	30173453	30178459	12	17	Spout1
ENSMUSG00000039648	chr2	30185124	30205847	98	160	Kyat1
ENSMUSG00000007476	chr2	30237715	30263790	526	951	Lrrc8a
ENSMUSG00000099041	chr2	30240567	30282148	1105	1707	NA
ENSMUSG00000079484	chr2	30266203	30282149	618	807	Phyhd1
ENSMUSG00000098794	chr2	30281043	30301078	86	137	NA
ENSMUSG00000075419	chr2	30284231	30286334	24	53	Dolk
ENSMUSG00000052533	chr2	30286397	30344266	173	289	Nup188
ENSMUSG00000026860	chr2	30344809	30359337	145	234	Sh3glb2
ENSMUSG00000026858	chr2	30364233	30385521	354	599	Miga2
ENSMUSG00000026856	chr2	30392254	30400529	35	51	Dolpp1
ENSMUSG00000026853	chr2	30400471	30415813	372	839	Crat
ENSMUSG00000039515	chr2	30416039	30447806	287	508	Ptpa
ENSMUSG00000089762	chr2	30471537	30474219	16	28	Ier5l
ENSMUSG00000047363	chr2	30595040	30608943	29	58	Cstad
ENSMUSG00000026857	chr2	30807826	30823033	99	135	Ntmt1
ENSMUSG00000039483	chr2	30823097	30830333	20	34	Asb6
ENSMUSG00000050737	chr2	30889471	30929863	16	30	Ptges
ENSMUSG00000026848	chr2	30952959	30959015	44	101	Tor1b
ENSMUSG00000026849	chr2	30960627	30967933	23	54	Tor1a
ENSMUSG00000026851	chr2	30972177	30982201	31	66	BC005624
ENSMUSG00000026854	chr2	30982279	31023586	270	401	Usp20
ENSMUSG00000075415	chr2	31026206	31142008	823	1346	Fnbp1
ENSMUSG00000087269	chr2	31146457	31152291	11	29	NA
ENSMUSG00000000194	chr2	31152316	31218775	453	695	Gpr107
ENSMUSG00000062661	chr2	31245823	31295989	62	124	Ncs1
ENSMUSG00000055632	chr2	31314415	31460738	427	746	Hmcn2
ENSMUSG00000076441	chr2	31470207	31520672	23	14	Ass1
ENSMUSG00000026843	chr2	31572651	31617526	198	343	Fubp3
ENSMUSG00000039356	chr2	31670715	31681349	38	44	Exosc2
ENSMUSG00000026842	chr2	31688376	31804227	837	1395	Abl1
ENSMUSG00000026840	chr2	31887291	31946539	15	17	Lamc3
ENSMUSG00000001864	chr2	31950139	31973442	15	15	Aif1l
ENSMUSG00000001855	chr2	31974436	32053975	238	445	Nup214
ENSMUSG00000050592	chr2	32050055	32084857	119	209	Fam78a
ENSMUSG00000090157	chr2	32050086	32064911	24	49	Fam78a
ENSMUSG00000051373	chr2	32095528	32110820	92	159	Plpp7
ENSMUSG00000039262	chr2	32151082	32234537	1050	1892	Prrc2b
ENSMUSG00000039254	chr2	32236590	32255005	50	92	Pomt1
ENSMUSG00000002550	chr2	32255002	32260159	26	49	Uck1
ENSMUSG00000044627	chr2	32278816	32288075	90	195	Swi5
ENSMUSG00000002546	chr2	32287384	32307921	160	310	Golga2
ENSMUSG00000026825	chr2	32308471	32353338	167	214	Dnm1
ENSMUSG00000039205	chr2	32352327	32380970	136	207	Ciz1
ENSMUSG00000039195	chr2	32377097	32381938	21	39	Bbln
ENSMUSG00000026820	chr2	32395896	32405772	51	81	Ptges2
ENSMUSG00000026819	chr2	32414487	32451445	100	166	Slc25a25
ENSMUSG00000039164	chr2	32450457	32456953	13	25	Naif1
ENSMUSG00000039157	chr2	32535332	32569756	151	298	Eeig1
ENSMUSG00000026810	chr2	32570858	32573579	26	35	Dpm2
ENSMUSG00000079442	chr2	32587095	32599698	76	136	St6galnac4
ENSMUSG00000026811	chr2	32599709	32620806	161	272	St6galnac6
ENSMUSG00000026817	chr2	32621758	32635058	1064	1761	Ak1
ENSMUSG00000026814	chr2	32646595	32682669	907	1566	Eng
ENSMUSG00000009566	chr2	32682609	32704145	27	39	Fpgs
ENSMUSG00000009555	chr2	32705784	32713076	59	78	Cdk9
ENSMUSG00000059013	chr2	32721055	32755512	340	518	Sh2d3c
ENSMUSG00000009563	chr2	32757234	32762244	18	27	Tor2a
ENSMUSG00000026797	chr2	32787602	32847245	191	343	Stxbp1
ENSMUSG00000026796	chr2	32876114	32925254	265	404	Niban2
ENSMUSG00000026792	chr2	32925216	32961614	102	143	Lrsam1
ENSMUSG00000038900	chr2	32961559	32965345	93	239	Rpl12
ENSMUSG00000065124	chr2	32963291	32963420	60	159	Snora65
ENSMUSG00000026791	chr2	32972990	32982083	45	61	Slc2a8
ENSMUSG00000038860	chr2	32986224	33131654	119	202	Garnl3
ENSMUSG00000038831	chr2	33133417	33371486	476	746	Ralgps1
ENSMUSG00000004105	chr2	33216069	33247717	280	514	Angptl2
ENSMUSG00000068966	chr2	33406108	33431324	91	133	Zbtb34
ENSMUSG00000026788	chr2	33450287	33468559	134	224	Zbtb43
ENSMUSG00000038740	chr2	33729953	33887946	399	694	Mvb12b
ENSMUSG00000038718	chr2	34171457	34373142	494	839	Pbx3
ENSMUSG00000038696	chr2	34406771	34624950	569	1052	Mapkap1
ENSMUSG00000026867	chr2	34674594	34755232	433	798	Gapvd1
ENSMUSG00000026864	chr2	34771970	34777547	361	921	Hspa5
ENSMUSG00000070953	chr2	34777556	34799912	45	70	Rabepk
ENSMUSG00000035949	chr2	34804514	34826311	118	272	Fbxw2
ENSMUSG00000026869	chr2	34849734	34874968	46	106	Psmd5
ENSMUSG00000026873	chr2	34893757	34914026	10	18	Phf19
ENSMUSG00000057110	chr2	35109492	35178822	157	290	Cntrl
ENSMUSG00000026878	chr2	35180205	35201120	340	709	Rab14
ENSMUSG00000026879	chr2	35256380	35307892	2539	5137	Gsn
ENSMUSG00000026880	chr2	35313986	35336976	280	485	Stom
ENSMUSG00000035778	chr2	35400179	35463231	305	546	Ggta1
ENSMUSG00000026883	chr2	35558266	35730994	1705	2577	Dab2ip
ENSMUSG00000026885	chr2	35751241	35979913	189	290	Ttll11
ENSMUSG00000026895	chr2	36036326	36049406	183	464	Ndufa8
ENSMUSG00000026890	chr2	36081953	36105408	90	176	Lhx6
ENSMUSG00000026889	chr2	36116079	36136773	112	250	Rbm18
ENSMUSG00000026887	chr2	36136389	36190647	136	305	Mrrf
ENSMUSG00000047250	chr2	36230426	36252272	98	192	Ptgs1
ENSMUSG00000009030	chr2	37350074	37359332	54	96	Pdcl
ENSMUSG00000075376	chr2	37370069	37422903	335	648	Rc3h2
ENSMUSG00000066798	chr2	37425500	37443171	60	105	Zbtb6
ENSMUSG00000050714	chr2	37432168	37443135	45	66	Zbtb26
ENSMUSG00000035437	chr2	37443279	37566454	498	888	Rabgap1
ENSMUSG00000026915	chr2	37483228	37703859	590	1029	Strbp
ENSMUSG00000053164	chr2	37516332	37520603	18	29	Gpr21
ENSMUSG00000035392	chr2	37798991	38287390	1582	2912	Dennd1a
ENSMUSG00000107529	chr2	38104432	38107296	11	19	NA
ENSMUSG00000026749	chr2	38511643	38594606	85	176	Nek6
ENSMUSG00000026750	chr2	38588036	38644087	218	469	Psmb7
ENSMUSG00000063972	chr2	38723370	38927688	242	303	Nr6a1
ENSMUSG00000085201	chr2	38823257	38852370	46	90	NA
ENSMUSG00000107468	chr2	38862163	38865533	11	16	NA
ENSMUSG00000046618	chr2	38931978	38963753	51	77	Olfml2a
ENSMUSG00000062997	chr2	39001580	39005624	16	38	Rpl35
ENSMUSG00000026755	chr2	39005348	39015877	81	149	Arpc5l
ENSMUSG00000026754	chr2	39016155	39065541	157	349	Golga1
ENSMUSG00000035236	chr2	39066214	39190734	301	512	Scai
ENSMUSG00000082315	chr2	39157486	39162235	10	17	Gm16523
ENSMUSG00000107955	chr2	39178562	39182041	16	25	NA
ENSMUSG00000026753	chr2	39194354	39226451	207	415	Ppp6c
ENSMUSG00000049252	chr2	40595246	42653624	99	142	Lrp1b
ENSMUSG00000049744	chr2	43748824	44395953	205	412	Arhgap15
ENSMUSG00000036890	chr2	44564412	44927657	417	761	Gtdc1
ENSMUSG00000026872	chr2	44983632	45117395	1143	2227	Zeb2
ENSMUSG00000085591	chr2	45357265	45404035	122	177	NA
ENSMUSG00000086353	chr2	48062548	48457245	385	616	Gm13481
ENSMUSG00000052155	chr2	48814109	48903269	385	713	Acvr2a
ENSMUSG00000026761	chr2	48902824	48950277	214	398	Orc4
ENSMUSG00000036792	chr2	48949508	49325405	1152	2067	Mbd5
ENSMUSG00000069495	chr2	49451486	49551948	384	723	Epc2
ENSMUSG00000026764	chr2	49619298	49774778	20	37	Kif5c
ENSMUSG00000026766	chr2	50279881	50296801	120	300	Mmadhc
ENSMUSG00000085862	chr2	50296810	50433967	106	193	Gm13483
ENSMUSG00000115545	chr2	50380400	50412610	28	33	NA
ENSMUSG00000017144	chr2	51130438	51149111	113	190	Rnd3
ENSMUSG00000036249	chr2	51924448	51935163	12	19	Rbm43
ENSMUSG00000026946	chr2	51948487	51973494	36	77	Nmi
ENSMUSG00000053475	chr2	52038009	52056686	17	16	Tnfaip6
ENSMUSG00000036202	chr2	52072832	52122383	156	258	Rif1
ENSMUSG00000026950	chr2	52136647	52378474	34	83	Neb
ENSMUSG00000036093	chr2	52397951	52424901	183	379	Arl5a
ENSMUSG00000017412	chr2	52428320	52676831	180	333	Cacnb4
ENSMUSG00000055371	chr2	52691664	52742281	166	290	Stam2
ENSMUSG00000036053	chr2	52857860	53133804	931	1541	Fmnl2
ENSMUSG00000061136	chr2	53134704	53191702	200	440	Prpf40a
ENSMUSG00000026960	chr2	53191726	53219220	113	204	Arl6ip6
ENSMUSG00000060988	chr2	54436317	55118309	54	54	Galnt13
ENSMUSG00000026824	chr2	55435970	55598145	1869	3628	Kcnj3
ENSMUSG00000026826	chr2	57106830	57124003	17	24	Nr4a2
ENSMUSG00000086396	chr2	57181831	57188257	24	69	4930555B11Rik
ENSMUSG00000026827	chr2	57237635	57370719	157	271	Gpd2
ENSMUSG00000026832	chr2	58129137	58195532	11	18	Cytip
ENSMUSG00000026834	chr2	58267453	58357895	16	29	Acvr1c
ENSMUSG00000026836	chr2	58388644	58567157	459	804	Acvr1
ENSMUSG00000026839	chr2	58567298	58792971	255	419	Upp2
ENSMUSG00000036641	chr2	58821070	59160683	17	18	Ccdc148
ENSMUSG00000026991	chr2	59160850	59355208	1930	3567	Pkp4
ENSMUSG00000035168	chr2	59612042	59846149	1594	2715	Tanc1
ENSMUSG00000026988	chr2	59852364	59882591	92	185	Wdsub1
ENSMUSG00000026987	chr2	59899363	60209839	1566	2726	Baz2b
ENSMUSG00000026977	chr2	60209887	60250676	456	801	Marchf7
ENSMUSG00000060703	chr2	60251993	60284488	30	64	Cd302
ENSMUSG00000054580	chr2	60417543	60553308	53	128	Pla2r1
ENSMUSG00000026971	chr2	60598292	60722643	408	749	Itgb6
ENSMUSG00000026970	chr2	60750193	60963192	2059	3536	Rbms1
ENSMUSG00000064289	chr2	61578585	61654171	157	360	Tank
ENSMUSG00000026914	chr2	61711694	61800376	217	418	Psmd14
ENSMUSG00000026904	chr2	62046462	62326730	17	28	Slc4a10
ENSMUSG00000035000	chr2	62330073	62412231	36	81	Dpp4
ENSMUSG00000000392	chr2	62500943	62574075	98	207	Fap
ENSMUSG00000026896	chr2	62595798	62646255	91	192	Ifih1
ENSMUSG00000026893	chr2	62664285	62694109	82	174	Gca
ENSMUSG00000059742	chr2	62693414	63184287	69	136	Kcnh7
ENSMUSG00000075324	chr2	63971507	64098038	769	1378	Fign
ENSMUSG00000026888	chr2	64912476	65024987	828	1561	Grb14
ENSMUSG00000034903	chr2	65088339	65239403	1551	2772	Cobll1
ENSMUSG00000061171	chr2	65316430	65364034	28	59	Slc38a11
ENSMUSG00000057182	chr2	65457118	65567627	46	93	Scn3a
ENSMUSG00000075318	chr2	65620771	65767447	15	40	Scn2a
ENSMUSG00000044647	chr2	65845767	66031546	20	19	Csrnp3
ENSMUSG00000034848	chr2	66184327	66256617	59	108	Ttc21b
ENSMUSG00000034810	chr2	66673425	66784914	222	449	Scn7a
ENSMUSG00000027022	chr2	67173834	67526615	1546	3566	Xirp2
ENSMUSG00000027022	chr2	67173834	67526615	1546	3566	Gm1322
ENSMUSG00000034780	chr2	67565871	68122689	425	742	B3galt1
ENSMUSG00000027030	chr2	68210445	68472268	1435	2618	Stk39
ENSMUSG00000027035	chr2	68861441	69114282	163	295	Cers6
ENSMUSG00000034738	chr2	69135800	69189330	112	158	Nostrin
ENSMUSG00000027070	chr2	69424340	69586065	17	33	Lrp2
ENSMUSG00000063145	chr2	69647171	69667571	18	37	Bbs5
ENSMUSG00000075307	chr2	69670120	69684230	71	225	Klhl41
ENSMUSG00000027086	chr2	69686815	69713516	94	215	Fastkd1
ENSMUSG00000042133	chr2	69722545	69754012	175	333	Ppig
ENSMUSG00000070883	chr2	69758033	69789575	18	30	Cfap210
ENSMUSG00000027088	chr2	69789623	69800005	36	91	Phospho2
ENSMUSG00000042155	chr2	69821944	69836651	121	220	Klhl23
ENSMUSG00000068882	chr2	69861562	69871846	83	156	Ssb
ENSMUSG00000051730	chr2	69871198	69885615	48	91	Mettl5
ENSMUSG00000044308	chr2	69897246	70024013	1056	2230	Ubr3
ENSMUSG00000042064	chr2	70039126	70429198	13	23	Myo3b
ENSMUSG00000070880	chr2	70553072	70602014	27	50	Gad1
ENSMUSG00000097025	chr2	70661149	70662109	68	65	NA
ENSMUSG00000014959	chr2	70661576	70712636	209	387	Gorasp2
ENSMUSG00000041997	chr2	70712407	70825728	556	981	Tlk1
ENSMUSG00000041975	chr2	70964561	71055583	76	134	Mettl8
ENSMUSG00000041966	chr2	71055328	71099142	96	162	Dcaf17
ENSMUSG00000027012	chr2	71211706	71263303	226	478	Dync1i2
ENSMUSG00000027010	chr2	71271063	71367749	874	1618	Slc25a12
ENSMUSG00000027018	chr2	71388958	71441622	67	153	Hat1
ENSMUSG00000041921	chr2	71453276	71525194	211	365	Metap1d
ENSMUSG00000027111	chr2	71745616	71858416	533	917	Itga6
ENSMUSG00000006494	chr2	71873224	71903858	161	401	Pdk1
ENSMUSG00000049044	chr2	71981240	72257474	355	677	Rapgef4
ENSMUSG00000004085	chr2	72285637	72442610	1667	2806	Map3k20
ENSMUSG00000027109	chr2	72936427	72980446	403	697	Sp3
ENSMUSG00000079286	chr2	72971548	72986716	101	146	NA
ENSMUSG00000063714	chr2	72979424	72988677	60	87	Sp3os
ENSMUSG00000027108	chr2	73092801	73218924	132	277	Ola1
ENSMUSG00000041777	chr2	73283105	73312701	85	168	Cir1
ENSMUSG00000008226	chr2	73312601	73337818	74	148	Scrn3
ENSMUSG00000041762	chr2	73341506	73386572	82	134	Gpr155
ENSMUSG00000087176	chr2	73386970	73420498	21	28	NA
ENSMUSG00000085768	chr2	73421909	73429142	14	16	NA
ENSMUSG00000075284	chr2	73429610	73529734	525	948	Wipf1
ENSMUSG00000056486	chr2	73610660	73775346	310	545	Chn1
ENSMUSG00000027104	chr2	73816509	73892639	339	581	Atf2
ENSMUSG00000018770	chr2	73908447	73911326	791	1990	Atp5g3
ENSMUSG00000009207	chr2	74520291	74579435	163	263	Lnpk
ENSMUSG00000079277	chr2	74711927	74748442	11	25	Hoxd3
ENSMUSG00000027099	chr2	74825803	74878431	256	497	Mtx2
ENSMUSG00000059005	chr2	75659261	75669407	130	212	Hnrnpa3
ENSMUSG00000015839	chr2	75675513	75704641	369	667	Nfe2l2
ENSMUSG00000042410	chr2	75832177	75931350	319	660	Agps
ENSMUSG00000075270	chr2	75989141	76338774	18	26	Pde11a
ENSMUSG00000042369	chr2	76369984	76383768	50	121	Rbm45
ENSMUSG00000042359	chr2	76406508	76600647	159	256	Osbpl6
ENSMUSG00000002731	chr2	76629898	76648015	58	119	Prkra
ENSMUSG00000002733	chr2	76675281	76696828	75	161	Plekha3
ENSMUSG00000051747	chr2	76703980	76982547	60690	161563	Ttn
ENSMUSG00000044033	chr2	77009902	77170636	1648	3073	Ccdc141
ENSMUSG00000042272	chr2	77180340	77280592	474	907	Sestd1
ENSMUSG00000027016	chr2	77410634	77819639	451	744	Zfp385b
ENSMUSG00000027014	chr2	77881159	77946375	242	373	Cwc22
ENSMUSG00000027011	chr2	78868124	78921293	300	561	Ube2e3
ENSMUSG00000027009	chr2	79255426	79333123	40	101	Itga4
ENSMUSG00000027007	chr2	79635352	79672966	287	565	Itprid2
ENSMUSG00000059173	chr2	79834453	80129458	298	558	Pde1a
ENSMUSG00000027006	chr2	80315466	80354043	125	259	Dnajc10
ENSMUSG00000027004	chr2	80411970	80447625	22	49	Frzb
ENSMUSG00000027002	chr2	80500512	80581380	645	1153	Nckap1
ENSMUSG00000027001	chr2	80617045	80632361	26	60	Dusp19
ENSMUSG00000026999	chr2	80617236	80658906	66	110	Nup35
ENSMUSG00000070866	chr2	82053222	82259879	11	21	Zfp804a
ENSMUSG00000027091	chr2	83644435	83664622	69	132	Zc3h15
ENSMUSG00000027087	chr2	83724397	83806916	277	521	Itgav
ENSMUSG00000048388	chr2	83812636	83883486	28	55	Fam171b
ENSMUSG00000059588	chr2	84330626	84425411	472	858	Calcrl
ENSMUSG00000027082	chr2	84432855	84476775	183	350	Tfpi
ENSMUSG00000118521	chr2	84576551	84592840	63	97	NA
ENSMUSG00000034101	chr2	84600071	84650765	1041	2016	Ctnnd1
ENSMUSG00000101645	chr2	84601439	84678041	1056	2022	NA
ENSMUSG00000076437	chr2	84669215	84670770	15	19	Selenoh
ENSMUSG00000050043	chr2	84671316	84679140	58	107	Tmx2
ENSMUSG00000027080	chr2	84678402	84688215	26	54	Med19
ENSMUSG00000034075	chr2	84687970	84715180	288	524	Zdhhc5
ENSMUSG00000034059	chr2	84734058	84738655	12	19	Ypel4
ENSMUSG00000023224	chr2	84765387	84775444	157	349	Serping1
ENSMUSG00000027078	chr2	84798828	84810335	26	68	Ube2l6
ENSMUSG00000027076	chr2	84826997	84830213	19	48	Timm10
ENSMUSG00000027075	chr2	84838850	84863594	20	49	Slc43a1
ENSMUSG00000050896	chr2	84871924	84886710	20	23	Rtn4rl2
ENSMUSG00000027074	chr2	84936579	84958509	706	1295	Slc43a3
ENSMUSG00000027067	chr2	85037234	85047109	69	119	Ssrp1
ENSMUSG00000033955	chr2	85048022	85073048	391	573	Tnks1bp1
ENSMUSG00000044338	chr2	85136225	85139923	134	255	Aplnr
ENSMUSG00000075224	chr2	85162334	85197197	10	18	Lrrc55
ENSMUSG00000045392	chr2	86020633	86045171	245	455	Or5m3b
ENSMUSG00000025314	chr2	90429754	90580647	615	1109	Ptprj
ENSMUSG00000051329	chr2	90677215	90736328	98	210	Nup160
ENSMUSG00000008200	chr2	90745370	90781021	172	373	Fnbp4
ENSMUSG00000040812	chr2	90782727	90834437	13	29	Agbl2
ENSMUSG00000027282	chr2	90847155	90866810	191	447	Mtch2
ENSMUSG00000005510	chr2	90894634	90904827	229	492	Ndufs3
ENSMUSG00000005505	chr2	90904740	90911626	23	52	Kbtbd4
ENSMUSG00000063235	chr2	90908716	90918258	46	98	Ptpmt1
ENSMUSG00000005506	chr2	90940382	91019497	957	1639	Celf1
ENSMUSG00000002104	chr2	91035620	91045729	22	40	Rapsn
ENSMUSG00000086495	chr2	91044092	91053933	16	21	NA
ENSMUSG00000002102	chr2	91054009	91066369	116	224	Psmc3
ENSMUSG00000002105	chr2	91061791	91070417	93	148	Slc39a13
ENSMUSG00000002111	chr2	91082390	91115756	50	76	Spi1
ENSMUSG00000002100	chr2	91118144	91136516	3753	8002	Mybpc3
ENSMUSG00000040687	chr2	91137360	91183837	109	142	Madd
ENSMUSG00000002108	chr2	91184061	91202834	71	123	Nr1h3
ENSMUSG00000086206	chr2	91195906	91202778	17	19	NA
ENSMUSG00000002103	chr2	91202885	91214098	78	138	Acp2
ENSMUSG00000002109	chr2	91211572	91236982	47	81	Ddb2
ENSMUSG00000027257	chr2	91255954	91264679	148	297	Pacsin3
ENSMUSG00000027255	chr2	91264974	91276931	154	245	Arfgap2
ENSMUSG00000040591	chr2	91275068	91444704	130	248	Cstpp1
ENSMUSG00000027253	chr2	91457511	91513779	117	202	Lrp4
ENSMUSG00000040549	chr2	91526762	91620664	256	550	Ckap5
ENSMUSG00000075040	chr2	91643669	91649791	18	25	Zfp408
ENSMUSG00000027247	chr2	91649860	91672326	102	204	Arhgap1
ENSMUSG00000027244	chr2	91674618	91710576	248	456	Atg13
ENSMUSG00000027243	chr2	91710852	91721545	33	49	Harbi1
ENSMUSG00000040506	chr2	91730134	91918849	830	1322	Ambra1
ENSMUSG00000040479	chr2	91932824	91975864	515	854	Dgkz
ENSMUSG00000027230	chr2	91982328	92024502	53	82	Creb3l1
ENSMUSG00000058318	chr2	92093117	92364666	1134	1933	Phf21a
ENSMUSG00000027222	chr2	92374676	92381217	34	51	Pex16
ENSMUSG00000027223	chr2	92383676	92401263	23	39	Mapk8ip1
ENSMUSG00000068742	chr2	92403646	92434043	226	382	Cry2
ENSMUSG00000049922	chr2	92452764	92460538	23	41	Slc35c1
ENSMUSG00000027221	chr2	92599707	92615250	22	38	Chst1
ENSMUSG00000085976	chr2	92742230	92759208	13	27	NA
ENSMUSG00000075028	chr2	92972018	93046167	191	337	Prdm11
ENSMUSG00000075027	chr2	93027956	93044732	18	33	4631405J19Rik
ENSMUSG00000068735	chr2	93187548	93201759	203	310	Trp53i11
ENSMUSG00000027217	chr2	93201760	93334505	547	931	Tspan18
ENSMUSG00000027215	chr2	93419111	93463140	37	68	Cd82
ENSMUSG00000027198	chr2	93661028	93822568	282	506	Ext2
ENSMUSG00000040272	chr2	93833467	93849943	31	54	Accs
ENSMUSG00000087006	chr2	93955810	93957201	21	23	Gm13889
ENSMUSG00000098004	chr2	93956817	93996354	153	190	NA
ENSMUSG00000040174	chr2	93980550	94010807	227	344	Alkbh3
ENSMUSG00000027195	chr2	94032689	94157964	123	229	Hsd17b12
ENSMUSG00000075020	chr2	94160636	94264918	362	185	NA
ENSMUSG00000027194	chr2	94300767	94406689	511	864	Ttc17
ENSMUSG00000045464	chr2	94406151	94411682	14	27	NA
ENSMUSG00000027193	chr2	94411682	94438136	141	235	Api5
ENSMUSG00000050587	chr2	96318169	97631666	138	197	Lrrc4c
ENSMUSG00000075014	chr2	98666547	98667301	57	114	NA
ENSMUSG00000027165	chr2	101560781	101649532	74	154	Iftap
ENSMUSG00000027164	chr2	101678429	101701669	70	125	Traf6
ENSMUSG00000032841	chr2	101714285	101883027	45	78	Prr5l
ENSMUSG00000027163	chr2	101886247	101901646	36	63	Commd9
ENSMUSG00000048058	chr2	101950203	102186385	463	769	Ldlrad3
ENSMUSG00000027189	chr2	102300119	102407828	453	879	Trim44
ENSMUSG00000027188	chr2	102550012	102643041	17	32	Pamr1
ENSMUSG00000005089	chr2	102658659	102790784	38	50	Slc1a2
ENSMUSG00000005087	chr2	102811141	102901665	3053	10839	Cd44
ENSMUSG00000065683	chr2	102897960	102898066	22	39	NA
ENSMUSG00000010914	chr2	103021075	103073513	213	448	Pdhx
ENSMUSG00000010911	chr2	103073675	103092644	36	95	Apip
ENSMUSG00000027187	chr2	103453849	103485160	338	698	Cat
ENSMUSG00000032724	chr2	103566310	103718423	731	1230	Abtb2
ENSMUSG00000027185	chr2	103721256	103761270	92	187	Nat10
ENSMUSG00000027184	chr2	103762941	103797649	436	830	Caprin1
ENSMUSG00000032698	chr2	103957986	103981878	58	113	Lmo2
ENSMUSG00000027180	chr2	104027721	104063240	414	966	Fbxo3
ENSMUSG00000032679	chr2	104095801	104115354	131	244	Cd59a
ENSMUSG00000068373	chr2	104143073	104411013	25	41	D430041D05Rik
ENSMUSG00000027177	chr2	104426481	104494446	1302	2549	Hipk3
ENSMUSG00000084516	chr2	104428861	104428940	16	30	Mir1902
ENSMUSG00000027176	chr2	104590523	104665429	261	508	Cstf3
ENSMUSG00000027175	chr2	104657288	104712169	105	189	Tcp11l1
ENSMUSG00000074994	chr2	104754795	104816760	367	647	Qser1
ENSMUSG00000027171	chr2	104830741	104849876	12	13	Prrg4
ENSMUSG00000027170	chr2	104999656	105017080	85	176	Eif3m
ENSMUSG00000074987	chr2	105076538	105126510	17	36	Wt1os
ENSMUSG00000016458	chr2	105126529	105173616	122	247	Wt1
ENSMUSG00000005973	chr2	105386291	105399319	55	105	Rcn1
ENSMUSG00000027167	chr2	105701027	105904564	283	563	Elp4
ENSMUSG00000042670	chr2	105904638	105965558	112	228	Immp1l
ENSMUSG00000027166	chr2	105966709	106003549	63	119	Dnajc24
ENSMUSG00000085218	chr2	106642914	106650364	37	45	BB218582
ENSMUSG00000016386	chr2	106693269	106868356	225	436	Mpped2
ENSMUSG00000027122	chr2	106962527	106974424	52	111	Arl14ep
ENSMUSG00000042604	chr2	107290639	107298502	12	24	Kcna4
ENSMUSG00000057234	chr2	109092297	109280748	141	224	Mettl15
ENSMUSG00000027115	chr2	109280738	109341747	14	26	Kif18a
ENSMUSG00000048482	chr2	109674700	109727007	48	79	Bdnf
ENSMUSG00000027162	chr2	109890853	109901003	151	297	Lin7c
ENSMUSG00000050199	chr2	109917647	110014257	376	702	Lgr4
ENSMUSG00000027160	chr2	110017817	110173360	32	65	Ccdc34
ENSMUSG00000074971	chr2	110360917	110363183	23	93	Fibin
ENSMUSG00000074968	chr2	110655201	110950923	28	45	Ano3
ENSMUSG00000027133	chr2	112261926	112263269	22	49	Nop10
ENSMUSG00000027130	chr2	112265825	112363163	691	1383	Slc12a6
ENSMUSG00000096764	chr2	112266314	112406319	839	1560	Slc12a6
ENSMUSG00000027131	chr2	112363011	112368027	17	64	Emc4
ENSMUSG00000027132	chr2	112379211	112414240	171	236	Katnbl1
ENSMUSG00000055943	chr2	112454997	112472162	65	131	Emc7
ENSMUSG00000003604	chr2	112492964	112634573	258	385	Aven
ENSMUSG00000057378	chr2	112631355	113217096	196	233	Ryr3
ENSMUSG00000044042	chr2	113327736	113716767	85	107	Fmn1
ENSMUSG00000041219	chr2	113831492	113848661	15	35	Arhgap11a
ENSMUSG00000092201	chr2	114013563	114068324	368	745	NA
ENSMUSG00000068614	chr2	114047282	114053548	8318	21002	Actc1
ENSMUSG00000092397	chr2	114054335	114064868	342	705	C130080G10Rik
ENSMUSG00000040383	chr2	114101170	114187024	163	320	Aqr
ENSMUSG00000040321	chr2	114193461	114201469	40	106	Zfp770
ENSMUSG00000057147	chr2	114516416	114654964	170	258	Dph6
ENSMUSG00000040282	chr2	115581716	115778768	126	235	Cdin1
ENSMUSG00000027210	chr2	115863064	116065839	1007	1703	Meis2
ENSMUSG00000086308	chr2	116067225	116085911	15	26	G630016G05Rik
ENSMUSG00000027351	chr2	117121374	117182279	323	643	Spred1
ENSMUSG00000065845	chr2	117248271	117248434	64	90	Gm25189
ENSMUSG00000027349	chr2	117249739	117271540	59	102	Fam98b
ENSMUSG00000040152	chr2	118111876	118127133	74	148	Thbs1
ENSMUSG00000005102	chr2	118388618	118475234	233	408	Eif2ak4
ENSMUSG00000009549	chr2	118475850	118479711	37	98	Srp14
ENSMUSG00000040093	chr2	118528757	118549687	87	147	Bmf
ENSMUSG00000040084	chr2	118598211	118641591	10	25	Bub1b
ENSMUSG00000074923	chr2	118663303	118698020	86	120	Pak6
ENSMUSG00000078137	chr2	118699103	118703963	20	29	Ankrd63
ENSMUSG00000040061	chr2	118707517	118728438	20	21	Plcb2
ENSMUSG00000074918	chr2	118745758	118748810	168	263	Inafm2
ENSMUSG00000045838	chr2	118754158	118762661	124	283	Ccdc9b
ENSMUSG00000027331	chr2	118814003	118853957	11	25	Knstrn
ENSMUSG00000027332	chr2	118861954	118882909	507	839	Ivd
ENSMUSG00000040007	chr2	118900377	118924528	93	173	Bahd1
ENSMUSG00000074916	chr2	118926496	118928585	14	31	Chst14
ENSMUSG00000039983	chr2	119017779	119029393	24	55	Ccdc32
ENSMUSG00000027324	chr2	119034790	119039769	11	23	Rpusd2
ENSMUSG00000027326	chr2	119047119	119105501	14	26	Knl1
ENSMUSG00000070730	chr2	119137001	119157034	55	94	Rmdn3
ENSMUSG00000034278	chr2	119172500	119208795	40	88	Dnajc17
ENSMUSG00000068580	chr2	119208617	119217049	22	42	Zfyve19
ENSMUSG00000034216	chr2	119288740	119298453	29	54	Vps18
ENSMUSG00000074912	chr2	119321187	119326194	12	17	Gm14207
ENSMUSG00000027314	chr2	119325784	119335962	100	192	Dll4
ENSMUSG00000034154	chr2	119373042	119477687	432	732	Ino80
ENSMUSG00000014077	chr2	119547697	119587027	338	591	Chp1
ENSMUSG00000085438	chr2	119594297	119607502	1178	2343	Oip5os1
ENSMUSG00000027306	chr2	119618298	119651244	23	30	Nusap1
ENSMUSG00000064906	chr2	119631118	119631236	15	14	n-R5s204
ENSMUSG00000027305	chr2	119655446	119662827	38	93	Ndufaf1
ENSMUSG00000027304	chr2	119675068	119735407	251	399	Rtf1
ENSMUSG00000034032	chr2	119763304	119787537	54	106	Rpap1
ENSMUSG00000027298	chr2	119797733	119818104	11	24	Tyro3
ENSMUSG00000033943	chr2	119897228	119969581	419	805	Mga
ENSMUSG00000033902	chr2	119972699	120027408	151	264	Mapkbp1
ENSMUSG00000098789	chr2	120027483	120032594	16	31	Jmjd7
ENSMUSG00000033852	chr2	120027493	120043033	48	92	Gm28042
ENSMUSG00000098488	chr2	120033417	120043030	28	50	Pla2g4b
ENSMUSG00000074899	chr2	120041493	120085678	36	43	Sptbn5
ENSMUSG00000027293	chr2	120089175	120154606	990	1831	Ehd4
ENSMUSG00000050211	chr2	120166412	120245335	427	601	Pla2g4e
ENSMUSG00000027291	chr2	120316461	120353137	132	270	Vps39
ENSMUSG00000033808	chr2	120355312	120404113	239	476	Tmem87a
ENSMUSG00000062646	chr2	120403896	120461700	89	178	Ganc
ENSMUSG00000118623	chr2	120456019	120504773	19	34	NA
ENSMUSG00000027288	chr2	120506820	120563843	1259	2639	Zfp106
ENSMUSG00000027287	chr2	120567671	120601255	311	563	Snap23
ENSMUSG00000027286	chr2	120604238	120609520	24	52	Lrrc57
ENSMUSG00000027285	chr2	120609383	120621560	35	78	Haus2
ENSMUSG00000033705	chr2	120629121	120731895	411	683	Stard9
ENSMUSG00000065083	chr2	120640711	120640835	18	34	NA
ENSMUSG00000027284	chr2	120716154	120850128	283	500	Cdan1
ENSMUSG00000090100	chr2	120732816	120850604	223	370	Ttbk2
ENSMUSG00000027272	chr2	120860269	120970715	346	747	Ubr1
ENSMUSG00000054484	chr2	120977017	121007852	34	66	Tmem62
ENSMUSG00000023572	chr2	121008403	121016904	25	87	Ccndbp1
ENSMUSG00000074890	chr2	121128307	121140653	14	42	Lcmt2
ENSMUSG00000027259	chr2	121140428	121156680	44	75	Adal
ENSMUSG00000050619	chr2	121158273	121171125	51	79	Zscan29
ENSMUSG00000027263	chr2	121170654	121198770	66	138	Tubgcp4
ENSMUSG00000043909	chr2	121193281	121271407	190	316	Trp53bp1
ENSMUSG00000027254	chr2	121289600	121310832	54	118	Map1a
ENSMUSG00000033526	chr2	121310561	121355396	344	700	Ppip5k1
ENSMUSG00000033486	chr2	121392631	121413792	34	70	Catsper2
ENSMUSG00000027248	chr2	121413775	121438687	187	385	Pdia3
ENSMUSG00000074884	chr2	121449195	121458313	246	438	Serf2
ENSMUSG00000027245	chr2	121453290	121458672	56	88	Hypk
ENSMUSG00000048222	chr2	121460235	121474067	20	37	Mfap1b
ENSMUSG00000068479	chr2	121491911	121506665	40	64	Mfap1a
ENSMUSG00000027242	chr2	121506723	121544860	165	195	Wdr76
ENSMUSG00000027238	chr2	121545529	121807087	360	698	Frmd5
ENSMUSG00000060227	chr2	121866970	121936220	80	143	Golm2
ENSMUSG00000033411	chr2	121956001	122013642	197	308	Ctdspl2
ENSMUSG00000027236	chr2	122028546	122056598	125	221	Eif3j1
ENSMUSG00000033396	chr2	122053520	122118386	131	233	Spg11
ENSMUSG00000060802	chr2	122147686	122153083	161	429	B2m
ENSMUSG00000027227	chr2	122234749	122265340	111	190	Sord
ENSMUSG00000033256	chr2	122348892	122369162	32	59	Shf
ENSMUSG00000027219	chr2	122426477	122461137	198	336	Slc28a2
ENSMUSG00000027199	chr2	122594467	122611303	11	20	Gatm
ENSMUSG00000005802	chr2	122681233	122702663	70	108	Slc30a4
ENSMUSG00000005804	chr2	122738503	122749475	70	94	Bloc1s6
ENSMUSG00000005803	chr2	122765237	122809569	98	186	Sqor
ENSMUSG00000027200	chr2	124089969	124667770	480	894	Sema6d
ENSMUSG00000027201	chr2	125084628	125123661	112	198	Myef2
ENSMUSG00000027203	chr2	125247190	125258608	25	72	Dut
ENSMUSG00000027204	chr2	125300594	125507993	760	1607	Fbn1
ENSMUSG00000068394	chr2	125563088	125625113	59	90	Cep152
ENSMUSG00000091337	chr2	125673095	125674785	30	108	Eid1
ENSMUSG00000035093	chr2	125736986	125782870	248	478	Secisbp2l
ENSMUSG00000027206	chr2	125830304	125859139	149	315	Cops2
ENSMUSG00000027207	chr2	125859109	125984299	104	151	Galk2
ENSMUSG00000027208	chr2	126034658	126091185	16	30	Fgf7
ENSMUSG00000023330	chr2	126152141	126165279	17	31	Dtwd1
ENSMUSG00000060131	chr2	126320973	126500674	39	79	Atp8b4
ENSMUSG00000027360	chr2	126593667	126619299	13	24	Hdc
ENSMUSG00000027361	chr2	126627442	126676337	165	301	Gabpb1
ENSMUSG00000098024	chr2	126675916	126683805	47	80	NA
ENSMUSG00000027363	chr2	126707328	126759297	351	566	Usp8
ENSMUSG00000027365	chr2	126791565	126876230	678	1454	Trpm7
ENSMUSG00000027366	chr2	126890391	126933235	333	631	Sppl2a
ENSMUSG00000001998	chr2	127008717	127067909	169	279	Ap4e1
ENSMUSG00000001999	chr2	127070665	127097084	44	76	Blvra
ENSMUSG00000034906	chr2	127103809	127133954	17	38	Ncaph
ENSMUSG00000074825	chr2	127138772	127143442	55	92	Itpripl1
ENSMUSG00000003660	chr2	127208386	127240451	164	382	Snrnp200
ENSMUSG00000003662	chr2	127240938	127247816	26	92	Ciao1
ENSMUSG00000034850	chr2	127247908	127261107	186	317	Tmem127
ENSMUSG00000027367	chr2	127270218	127298932	480	880	Stard7
ENSMUSG00000027371	chr2	127436215	127444565	47	65	Fahd2a
ENSMUSG00000079056	chr2	127456498	127522094	59	76	Kcnip3
ENSMUSG00000034800	chr2	127574662	127587094	10	21	Zfp661
ENSMUSG00000027374	chr2	127587222	127606829	59	122	Mrps5
ENSMUSG00000027375	chr2	127633226	127656695	14	20	Mal
ENSMUSG00000027377	chr2	127704386	127729932	33	64	Mall
ENSMUSG00000027378	chr2	127740732	127788897	48	81	Nphp1
ENSMUSG00000027381	chr2	128126038	128162547	144	206	Bcl2l11
ENSMUSG00000074813	chr2	128178319	128502765	464	731	Morrbid
ENSMUSG00000014355	chr2	128610104	128687391	361	765	Anapc1
ENSMUSG00000014361	chr2	128698956	128802894	327	628	Mertk
ENSMUSG00000014353	chr2	128818118	128854261	219	400	Tmem87b
ENSMUSG00000027387	chr2	128926268	128944077	31	89	Zc3h8
ENSMUSG00000074807	chr2	128965505	128968044	14	33	NA
ENSMUSG00000042851	chr2	128967402	129018563	107	172	Zc3h6
ENSMUSG00000027394	chr2	129065942	129096283	64	148	Ttl
ENSMUSG00000027395	chr2	129100995	129126594	45	80	Polr1b
ENSMUSG00000037938	chr2	129129700	129134134	11	22	Chchd5
ENSMUSG00000027397	chr2	129198764	129211616	101	173	Slc20a1
ENSMUSG00000043727	chr2	129458359	129536602	12	10	F830045P16Rik
ENSMUSG00000037902	chr2	129592835	129632228	227	386	Sirpa
ENSMUSG00000037885	chr2	129800517	129832287	184	342	Stk35
ENSMUSG00000027404	chr2	130171414	130179403	115	233	Snrpb
ENSMUSG00000027405	chr2	130274430	130279313	85	209	Nop56
ENSMUSG00000080610	chr2	130275506	130275573	11	21	Snord110
ENSMUSG00000065287	chr2	130276237	130276369	32	105	Gm24451
ENSMUSG00000065289	chr2	130277697	130277766	10	17	Gm23650
ENSMUSG00000027406	chr2	130279309	130284547	359	887	Idh3b
ENSMUSG00000053552	chr2	130295169	130370481	43	78	Ebf4
ENSMUSG00000037773	chr2	130417247	130424701	36	46	Pced1a
ENSMUSG00000027411	chr2	130424339	130444269	68	126	Vps16
ENSMUSG00000027303	chr2	130450278	130556124	566	1006	Ptpra
ENSMUSG00000115955	chr2	130523995	130527284	15	20	NA
ENSMUSG00000037740	chr2	130563742	130568695	14	43	Mrps26
ENSMUSG00000027300	chr2	130590002	130630038	80	205	Ubox5
ENSMUSG00000079043	chr2	130613840	130630027	40	133	Fastkd5
ENSMUSG00000037703	chr2	130632839	130642803	30	37	Lzts3
ENSMUSG00000068290	chr2	130653960	130664659	82	193	Ddrgk1
ENSMUSG00000074797	chr2	130667610	130681614	27	58	Itpa
ENSMUSG00000027309	chr2	130706200	130906406	1380	2375	Dnaaf9
ENSMUSG00000085566	chr2	130873059	130906396	68	152	NA
ENSMUSG00000027312	chr2	130906495	131030333	477	786	Atrn
ENSMUSG00000027316	chr2	131039632	131043088	11	14	Gfra4
ENSMUSG00000027318	chr2	131050591	131063814	25	44	Adam33
ENSMUSG00000027322	chr2	131069220	131086765	32	58	Siglec1
ENSMUSG00000074793	chr2	131127280	131146321	346	596	Hspa12b
ENSMUSG00000027327	chr2	131146324	131160081	24	42	Adissp
ENSMUSG00000027329	chr2	131170261	131187282	333	503	Spef1
ENSMUSG00000068267	chr2	131175182	131180067	312	459	Cenpb
ENSMUSG00000027330	chr2	131186949	131198497	31	54	Cdc25b
ENSMUSG00000068264	chr2	131207078	131213514	40	80	Ap5s1
ENSMUSG00000037523	chr2	131234063	131248025	190	337	Mavs
ENSMUSG00000037514	chr2	131262495	131299188	381	609	Pank2
ENSMUSG00000048911	chr2	131298064	131352892	79	108	Rnf24
ENSMUSG00000086329	chr2	131298545	131299835	11	10	NA
ENSMUSG00000083671	chr2	131454128	131454640	51	67	NA
ENSMUSG00000027333	chr2	131491496	131525922	188	334	Smox
ENSMUSG00000027335	chr2	131545850	131562283	20	45	Adra1d
ENSMUSG00000079037	chr2	131909928	131938429	238	459	Prnp
ENSMUSG00000098754	chr2	131909957	131956130	264	489	Prn
ENSMUSG00000027338	chr2	131950861	131956130	21	24	Prnd
ENSMUSG00000027339	chr2	131989415	132030258	96	159	Rassf2
ENSMUSG00000027340	chr2	132052496	132145108	386	633	Slc23a2
ENSMUSG00000027341	chr2	132239492	132247807	31	44	Tmem230
ENSMUSG00000027342	chr2	132249162	132253314	18	41	Pcna
ENSMUSG00000058793	chr2	132263148	132312050	903	1508	Cds2
ENSMUSG00000027346	chr2	132529082	132587729	1635	3199	Gpcpd1
ENSMUSG00000074783	chr2	132598195	132653068	43	55	AU019990
[truncated: 12,677 more rows]

## Sheet: Annotated_featurecounts_inputOB
Geneid	Chr	Start	End	OB1in	OB2in	SYMBOL
[truncated: 18,368 more rows]
