# Supplementary material for: Dilated cardiomyopathy-associated RNA Binding Motif Protein 20 regulates long pre-mRNAs in neurons
Source: bioRxiv preprint, doi:10.1101/2023.12.06.570345, version 3 (2025-01-20)
Supplement: Supplementary Table 4 [file 570345_file17.xlsx]

## Sheet: OB_DGE
Genes analysis results OB
FAST DB STABLE ID	Gene Symbol	FC	P-value	P-value adjusted	Chromosome Coordinates	Gene Name	EnsEMBL ID	Expression CamK	Expression CamK_W
GSMG0000005	Lypla1	1.26046	0.0102969	0.108727	chr1:4807823-4849352	lysophospholipase 1	---	7296.47	5788.58
GSMG0000006	Tcea1	1.29202	0.00678997	0.0840326	chr1:4857694-4897906	transcription elongation factor A (SII) 1	---	3596.81	2783.55
GSMG0000009	Atp6v1h	1.30025	0.00606184	0.0788424	chr1:5083086-5162549	ATPase, H+ transporting, lysosomal V1 subunit H	---	9158.87	7043.9
GSMG0000012	Rb1cc1	-1.64232	0.0055787	0.0741805	chr1:6214660-6276365	RB1-inducible coiled-coil 1	---	1566.1	2571.59
GSMG0000013	Alkal1	1.34127	0.244415	0.675488	chr1:6359331-6394731	ALK and LTK ligand 1	ENSMUSG00000087247	69.8542	52.0226
GSMG0000016	Pcmtd1	-1.10643	0.18535	0.590562	chr1:7088920-7173631	protein-L-isoaspartate (D-aspartate) O-methyltransferase domain containing 1	ENSMUSG00000051285	6591.19	7292.49
GSMG0000023	Rrs1	-1.0253	0.764139	0.920081	chr1:9545407-9547457	ribosome biogenesis regulator 1	ENSMUSG00000061024	1733.35	1776.61
GSMG0000024	Adhfe1	1.1432	0.397355	0.793776	chr1:9547948-9580675	alcohol dehydrogenase, iron containing, 1	ENSMUSG00000025911	109.764	96.1303
GSMG0000025	Vxn	-1.15197	0.877115	0.948986	chr1:9601266-9627143	vexin	ENSMUSG00000067879	955.502	1100.72
GSMG0000027	Sgk3	1.09616	0.413678	0.803482	chr1:9798130-9903826	serum/glucocorticoid regulated kinase 3	---	293.702	267.604
GSMG0000030	Cspp1	-1.4311	0.0349955	0.226884	chr1:10037987-10136768	centrosome and spindle pole associated protein 1	---	97.411	139.438
GSMG0000035	A830018L16Rik	-1.17376	0.71208	0.905642	chr1:11414105-11975902	RIKEN cDNA A830018L16 gene	---	393.167	461.537
GSMG0000057	Terf1	1.0967	0.487082	0.845039	chr1:15805645-15844052	telomeric repeat binding factor 1	---	198.185	180.392
GSMG0000059	Rdh10	1.11166	0.543371	0.860071	chr1:16105774-16132550	retinol dehydrogenase 10 (all-trans)	ENSMUSG00000025921	162.897	146.153
GSMG0000062	Tmem70	1.37401	0.00433283	0.063771	chr1:16665191-16678275	transmembrane protein 70	---	7311.18	5321.09
GSMG0000063	Ly96	-1.10435	0.655654	0.905642	chr1:16688432-16709605	lymphocyte antigen 96	---	65.926	73.1085
GSMG0000066	Gdap1	1.15248	0.0694984	0.338661	chr1:17145362-17164268	ganglioside-induced differentiation-associated-protein 1	ENSMUSG00000025777	3292.46	2856.6
GSMG0000070	Tfap2d	-1.37556	0.717212	0.905642	chr1:19103021-19173948	transcription factor AP-2, delta	ENSMUSG00000042596	154.206	212.166
GSMG0000077	Paqr8	-1.11189	0.193714	0.6036	chr1:20890548-20939650	progestin and adipoQ receptor family member VIII	---	1101.26	1224.46
GSMG0000081	Tmem14a	1.38845	0.00495972	0.0689119	chr1:21218575-21230165	transmembrane protein 14A	---	1737.97	1251.52
GSMG0000091	B3gat2	1.00979	0.946413	0.98263	chr1:23761753-23848593	beta-1,3-glucuronyltransferase 2 (glucuronosyltransferase S)	ENSMUSG00000026156	428.76	424.448
GSMG0000097	Lmbrd1	1.0611	0.403211	0.793776	chr1:24586581-24766299	LMBR1 domain containing 1	---	3773.72	3557.02
GSMG0000107	Khdrbs2	1.05257	0.571747	0.882332	chr1:32172722-32658569	KH domain containing, RNA binding, signal transduction associated 2	ENSMUSG00000026058	2039.94	1938.33
GSMG0000116	Rab23	-1.06556	0.515356	0.845039	chr1:33719887-33742564	RAB23, member RAS oncogene family	---	437.981	466.676
GSMG0000117	Dst	-4.37345	3.80169e-06	0.000826354	chr1:33908225-34308662	dystonin	---	932.911	4080.54
GSMG0000122	Imp4	1.07434	0.422849	0.813099	chr1:34439829-34445747	IMP4, U3 small nucleolar ribonucleoprotein	ENSMUSG00000026127	1291.76	1202.31
GSMG0000123	---	-1.2026	0.0766268	0.358683	chr1:34445788-34449310	---	---	299.698	360.376
GSMG0000127	Amer3	-1.28838	0.0120079	0.119894	chr1:34579693-34590942	APC membrane recruitment 3	ENSMUSG00000045174	2493.12	3212.75
GSMG0000132	Plekhb2	1.32047	0.0146046	0.134398	chr1:34849959-34879585	pleckstrin homology domain containing, family B (evectins) member 2	---	26146	19800.5
GSMG0000135	Hs6st1	-1.17428	0.0174717	0.149688	chr1:36068379-36107310	heparan sulfate 6-O-sulfotransferase 1	ENSMUSG00000045216	6013.18	7061.35
GSMG0000137	Arid5a	1.43072	0.00359761	0.0575881	chr1:36307733-36324029	AT rich interactive domain 5A (MRF1-like)	---	3247.92	2269.66
GSMG0000140	Cnnm4	1.04417	0.75606	0.915864	chr1:36471597-36508778	cyclin M4	ENSMUSG00000037408	634.949	608.622
GSMG0000143	Cnnm3	-1.1088	0.387441	0.793776	chr1:36511867-36528237	cyclin M3	---	390.632	433.426
GSMG0000146	Cox5b	1.46798	0.000459548	0.0167988	chr1:36691487-36693387	cytochrome c oxidase subunit 5B	ENSMUSG00000061518	43311.8	29504
GSMG0000148	Zap70	1.47682	0.0503351	0.280718	chr1:36761798-36782820	zeta-chain (TCR) associated protein kinase	---	86.087	58.3115
GSMG0000152	Inpp4a	-2.00488	0.000191664	0.00987547	chr1:37299838-37410740	inositol polyphosphate-4-phosphatase, type I	---	1733.3	3475.49
GSMG0000155	Unc50	1.3555	0.00635755	0.0810857	chr1:37430139-37439124	unc-50 homolog	---	3109.24	2293.77
GSMG0000158	Lipt1	1.23254	0.0719837	0.345877	chr1:37871738-37877387	lipoyltransferase 1	ENSMUSG00000037216	341.757	277.193
GSMG0000159	Mrpl30	1.40769	0.000915502	0.0256097	chr1:37890477-37898338	mitochondrial ribosomal protein L30	---	6293.42	4470.66
GSMG0000161	Eif5b	-1.20605	0.167922	0.561411	chr1:37998009-38055579	eukaryotic translation initiation factor 5B	ENSMUSG00000026083	835.171	1006.95
GSMG0000168	Pdcl3	1.29472	0.0128954	0.12481	chr1:38987772-38997236	phosducin-like 3	ENSMUSG00000026078	1870.27	1444.17
GSMG0000170	Npas2	-1.55608	0.0499019	0.2795	chr1:39194204-39363240	neuronal PAS domain protein 2	ENSMUSG00000026077	312.426	486.571
GSMG0000171	Rpl31	1.50183	0.000101679	0.00679964	chr1:39367851-39371911	ribosomal protein L31	---	6925.85	4611.47
GSMG0000172	Cnot11	1.06772	0.496161	0.845039	chr1:39534992-39546875	CCR4-NOT transcription complex, subunit 11	ENSMUSG00000003135	1636.02	1531.51
GSMG0000173	---	-1.03745	0.818909	0.944886	chr1:39650176-39657390	---	---	289.634	300.491
GSMG0000174	Map4k4	-1.43677	0.0164936	0.144677	chr1:39900913-40026310	mitogen-activated protein kinase kinase kinase kinase 4	---	2393.83	3439.36
GSMG0000185	Slc9a4	-1.0091	0.942626	0.980895	chr1:40580200-40630731	solute carrier family 9 (sodium/hydrogen exchanger), member 4	ENSMUSG00000026065	469.102	473.85
GSMG0000186	Slc9a2	-1.0619	0.66973	0.905642	chr1:40681335-40769266	solute carrier family 9 (sodium/hydrogen exchanger), member 2	ENSMUSG00000026062	1067.09	1132.93
GSMG0000188	Tmem182	-1.32592	0.247203	0.679379	chr1:40805601-40856886	transmembrane protein 182	ENSMUSG00000079588	48.3425	63.4673
GSMG0000193	Pou3f3	-1.32817	0.00199818	0.0407829	chr1:42695768-42700210	POU domain, class 3, transcription factor 3	ENSMUSG00000045515	4450.53	5911.24
GSMG0000194	2900092D14Rik	-1.17578	0.155195	0.539201	chr1:42700336-42703176	RIKEN cDNA 2900092D14 gene	---	1324.68	1558.22
GSMG0000196	Mrps9	1.25629	0.0381354	0.238047	chr1:42851233-42905682	mitochondrial ribosomal protein S9	ENSMUSG00000060679	2761.53	2198.23
GSMG0000198	Gpr45	1.03075	0.702012	0.905642	chr1:42952870-43035449	G protein-coupled receptor 45	ENSMUSG00000041907	1654.35	1605.21
GSMG0000200	AI597479	-1.01242	0.895322	0.957206	chr1:43098710-43115945	expressed sequence AI597479	ENSMUSG00000010290	560.728	567.555
GSMG0000203	Nck2	-1.0436	0.717567	0.905642	chr1:43445751-43570516	non-catalytic region of tyrosine kinase adaptor protein 2	ENSMUSG00000066877	1238.5	1292.75
GSMG0000210	Tpp2	-1.06844	0.690014	0.905642	chr1:43933994-44002999	tripeptidyl peptidase II	---	303.402	324.213
GSMG0000211	Bivm	-1.02438	0.833377	0.945798	chr1:44118957-44144771	basic, immunoglobulin-like variable motif containing	---	388.548	398.733
GSMG0000212	Ercc5	-1.43181	0.0359847	0.230013	chr1:44147744-44181260	excision repair cross-complementing rodent repair deficiency, complementation group 5	ENSMUSG00000026048	544.429	779.402
GSMG0000214	Gulp1	1.01868	0.929692	0.974397	chr1:44551511-44796836	GULP, engulfment adaptor PTB domain containing 1	---	77.5641	75.7749
GSMG0000221	Wdr75	1.12868	0.195864	0.606755	chr1:45795166-45823637	WD repeat domain 75	ENSMUSG00000025995	974.894	863.655
GSMG0000229	Tmeff2	1.08866	0.266691	0.701439	chr1:50900645-51187270	transmembrane protein with EGF-like and two follistatin-like domains 2	ENSMUSG00000026109	3994.24	3668.29
GSMG0000238	Stat1	-1.05983	0.568873	0.880344	chr1:52119436-52161865	signal transducer and activator of transcription 1	---	1513.88	1604.56
GSMG0000243	Nemp2	1.02151	0.942427	0.980815	chr1:52630705-52651919	nuclear envelope integral membrane protein 2	---	47.1868	46.1028
GSMG0000244	Hibch	1.24873	0.0174112	0.149416	chr1:52844928-52920986	3-hydroxyisobutyryl-Coenzyme A hydrolase	ENSMUSG00000041426	1531.96	1227.44
GSMG0000248	Ormdl1	1.08252	0.5424	0.859157	chr1:53297095-53310309	ORM1-like 1 (S. cerevisiae)	ENSMUSG00000026097	1387.39	1281.84
GSMG0000249	Osgepl1	1.27698	0.021228	0.168047	chr1:53313624-53326343	O-sialoglycoprotein endopeptidase-like 1	---	1127.79	883.136
GSMG0000253	Coq10b	1.37745	0.00829732	0.095074	chr1:55052769-55072701	coenzyme Q10B	---	3064.5	2224.28
GSMG0000255	Hspe1	1.53442	0.000344412	0.0138264	chr1:55088148-55091317	heat shock protein 1 (chaperonin 10)	ENSMUSG00000073676	13194.5	8599.06
GSMG0000256	Mob4	1.25565	0.0479397	0.273098	chr1:55131245-55154898	MOB family member 4, phocein	---	10996.6	8757.69
GSMG0000262	Plcl1	1.15491	0.191082	0.599766	chr1:55405919-55765679	phospholipase C-like 1	ENSMUSG00000038349	1982.57	1716.62
GSMG0000277	Maip1	1.25781	0.0331971	0.220202	chr1:57406266-57417953	matrix AAA peptidase interacting protein 1	ENSMUSG00000025971	2003.54	1592.97
GSMG0000278	Spats2l	-1.04362	0.678931	0.905642	chr1:57774417-57948397	spermatogenesis associated, serine-rich 2-like	---	711.87	742.524
GSMG0000285	Aox4	-1.09972	0.489044	0.845039	chr1:58210396-58268600	aldehyde oxidase 4	ENSMUSG00000038242	387.823	426.473
GSMG0000287	Bzw1	1.11098	0.161746	0.551713	chr1:58392898-58407354	basic leucine zipper and W2 domains 1	ENSMUSG00000051223	16862.4	15177.7
GSMG0000288	Nif3l1	1.28048	0.00178505	0.0380299	chr1:58445151-58493999	Ngg1 interacting factor 3-like 1 (S. pombe)	ENSMUSG00000026036	2691.77	2102.38
GSMG0000290	Ndufb3	1.51242	0.000219813	0.0107535	chr1:58586397-58595962	NADH:ubiquinone oxidoreductase subunit B3	ENSMUSG00000026032	20640.2	13647.1
GSMG0000291	Gm20257	1.8126	0.0027775	0.0497115	chr1:58652641-58655831	caspase 8 pseudogene	ENSMUSG00000102059	148.91	82.2831
GSMG0000292	Cflar	1.10801	0.316246	0.750602	chr1:58711491-58758884	CASP8 and FADD-like apoptosis regulator	---	498.719	450.32
GSMG0000296	Stradb	1.11804	0.154705	0.538032	chr1:58973520-58995715	STE20-related kinase adaptor beta	---	1465.73	1310.57
GSMG0000297	---	-1.00162	0.993433	0.997283	chr1:59119832-59122139	---	---	152.349	152.813
GSMG0000299	Cdk15	-1.53202	0.124279	0.474367	chr1:59256906-59352448	cyclin-dependent kinase 15	ENSMUSG00000026023	57.1695	87.5201
GSMG0000300	Fzd7	1.16012	0.376488	0.793776	chr1:59482147-59486947	frizzled class receptor 7	ENSMUSG00000041075	295.068	254.912
GSMG0000304	Nop58	-1.03382	0.745228	0.910373	chr1:59685005-59712192	NOP58 ribonucleoprotein	ENSMUSG00000026020	1197.51	1237.56
GSMG0000305	---	-1.36531	0.022089	0.172481	chr1:59716538-59719044	---	---	215.504	294.202
GSMG0000306	Bmpr2	-1.29355	0.0684937	0.335859	chr1:59763399-59879014	bone morphogenetic protein receptor, type II (serine/threonine kinase)	ENSMUSG00000067336	2497.41	3230.28
GSMG0000310	Fam117b	-1.09971	0.412836	0.802577	chr1:59913005-59985348	family with sequence similarity 117, member B	ENSMUSG00000041040	1515.26	1666.82
GSMG0000313	Carf	-1.35929	0.00350254	0.0567055	chr1:60048642-60153952	calcium response factor	---	509.009	692.683
GSMG0000319	Cyp20a1	1.08248	0.526033	0.847681	chr1:60343300-60388059	cytochrome P450, family 20, subfamily a, polypeptide 1	ENSMUSG00000049439	490.992	453.532
GSMG0000320	Abi2	1.09414	0.23108	0.661384	chr1:60409619-60481162	abl interactor 2	---	17529.3	16020.9
GSMG0000323	---	1.32903	0.000545407	0.0186658	chr1:60704259-60704413	---	---	4853.38	3651.75
GSMG0000324	---	1.55804	0.000102221	0.00679964	chr1:60705328-60705699	---	---	708.557	454.31
GSMG0000325	Cd28	1.04298	0.78439	0.927026	chr1:60746388-60773359	CD28 antigen	ENSMUSG00000026012	1307.35	1253.3
GSMG0000332	Icos	-1.22498	0.475906	0.845039	chr1:60977914-61000318	inducible T cell co-stimulator	ENSMUSG00000026009	36.2269	44.0164
GSMG0000350	Nrp2	-1.8012	0.00193201	0.039871	chr1:62703317-62818692	neuropilin 2	---	342.283	617.258
GSMG0000356	Ino80dos	-1.51763	0.0662302	0.329886	chr1:63114471-63158295	INO80 complex subunit D, opposite strand	ENSMUSG00000084799	64.1817	96.7796
GSMG0000359	Eef1b2	1.43514	0.001984	0.0406514	chr1:63176831-63180486	eukaryotic translation elongation factor 1 beta 2	ENSMUSG00000025967	17605.2	12267.2
GSMG0000360	Zdbf2	-1.38254	0.0675758	0.333587	chr1:63200358-63314575	zinc finger, DBF-type containing 2	---	732.421	1012.12
GSMG0000362	Adam23	-1.1254	0.291047	0.723802	chr1:63445889-63596276	a disintegrin and metallopeptidase domain 23	---	6751.32	7597.72
GSMG0000363	Fastkd2	1.34436	0.0123162	0.121559	chr1:63730624-63754655	FAST kinase domains 2	---	1964.88	1461.52
GSMG0000365	Creb1	1.15727	0.213982	0.634971	chr1:64532804-64604547	cAMP responsive element binding protein 1	---	847.92	731.94
GSMG0000374	Pikfyve	-1.45283	0.0600369	0.310711	chr1:65186682-65278696	phosphoinositide kinase, FYVE type zinc finger containing	---	139.076	202.188
GSMG0000378	Map2	-1.66806	0.000689084	0.0216211	chr1:66175313-66442581	microtubule-associated protein 2	---	3221.66	5373.88
GSMG0000381	Unc80	-2.00423	0.00127289	0.0315019	chr1:66467934-66699150	unc-80, NALCN activator	ENSMUSG00000055567	931.611	1867.45
GSMG0000384	Rpe	1.08439	0.443093	0.830691	chr1:66700831-66719805	ribulose-5-phosphate-3-epimerase	---	2228.72	2055.77
GSMG0000395	Vwc2l	1.21245	0.349985	0.775145	chr1:70725715-70885397	von Willebrand factor C domain-containing protein 2-like	---	86.773	71.7946
GSMG0000401	Tmem169	-1.03932	0.652937	0.905642	chr1:72284367-72303103	transmembrane protein 169	ENSMUSG00000026188	4329.38	4499.85
GSMG0000402	Xrcc5	1.14903	0.060488	0.312175	chr1:72307419-72394953	X-ray repair complementing defective repair in Chinese hamster cells 5	ENSMUSG00000026187	2057.77	1790.88
GSMG0000405	Smarcal1	-1.08884	0.443242	0.83084	chr1:72537045-72636790	SWI/SNF related matrix associated, actin dependent regulator of chromatin, subfamily a-like 1	---	1523.76	1659.3
GSMG0000409	Igfbp2	1.5721	0.00142105	0.033582	chr1:72824480-72852469	insulin-like growth factor binding protein 2	---	33414.1	21254.7
GSMG0000417	Arpc2	1.16228	0.0667468	0.331569	chr1:74236517-74268208	actin related protein 2/3 complex, subunit 2	---	9445.95	8126.42
GSMG0000420	Pnkd	-1.08024	0.337801	0.76016	chr1:74284930-74353692	paroxysmal nonkinesiogenic dyskinesia	---	18635.3	20130.6
GSMG0000424	Catip	1.08667	0.567172	0.87922	chr1:74362107-74369321	ciliogenesis associated TTC17 interacting protein	---	186.868	172.35
GSMG0000426	Ctdsp1	-1.5007	0.101305	0.424127	chr1:74391599-74397266	CTD (carboxy-terminal domain, RNA polymerase II, polypeptide A) small phosphatase 1	ENSMUSG00000026176	30.9471	46.8397
GSMG0000428	Cnot9	1.14398	0.141682	0.512394	chr1:74506058-74530842	CCR4-NOT transcription complex, subunit 9	ENSMUSG00000026174	1654.98	1445.76
GSMG0000430	Bcs1l	1.28178	0.00928283	0.101917	chr1:74588289-74592443	BCS1-like (yeast)	---	2121.92	1655.53
GSMG0000433	Cyp27a1	1.0616	0.560234	0.873486	chr1:74713326-74737897	cytochrome P450, family 27, subfamily a, polypeptide 1	ENSMUSG00000026170	1671.43	1574.06
GSMG0000434	Wnt6	1.18994	0.491845	0.845039	chr1:74771891-74785319	wingless-type MMTV integration site family, member 6	ENSMUSG00000033227	72.7513	61.1104
GSMG0000435	Wnt10a	-1.06211	0.649673	0.905642	chr1:74791516-74804173	wingless-type MMTV integration site family, member 10A	ENSMUSG00000026167	628.923	668.428
GSMG0000437	Cdk5r2	-1.03908	0.728654	0.905642	chr1:74855029-74857732	cyclin-dependent kinase 5, regulatory subunit 2 (p39)	ENSMUSG00000090071	9907.69	10295.3
GSMG0000440	Retreg2	1.14306	0.0838008	0.377858	chr1:75142785-75147915	reticulophagy regulator family member 2	---	13923.7	12181
GSMG0000441	Zfand2b	1.2824	0.0182628	0.153917	chr1:75168646-75171626	zinc finger, AN1 type domain 2B	---	1684.13	1313.5
GSMG0000442	Ankzf1	-1.0017	0.989588	0.995877	chr1:75192148-75199383	ankyrin repeat and zinc finger domain containing 1	---	227.956	228.927
GSMG0000443	Stk16	1.41655	0.00202232	0.0409841	chr1:75210829-75215606	serine/threonine kinase 16	---	5510.87	3890.26
GSMG0000444	Dnajb2	1.14977	0.0344223	0.224582	chr1:75236423-75245690	DnaJ heat shock protein family (Hsp40) member B2	---	16572.9	14414.3
GSMG0000446	Speg	-1.6635	0.136267	0.501371	chr1:75375297-75432270	SPEG complex locus	---	1188.16	1976.64
GSMG0000447	Gmppa	1.21404	0.0592654	0.308133	chr1:75435936-75443179	GDP-mannose pyrophosphorylase A	---	3331.67	2744.39
GSMG0000448	Asic4	1.086	0.897174	0.957911	chr1:75450510-75474343	acid-sensing (proton-gated) ion channel family member 4	ENSMUSG00000033007	87.4812	80.53
GSMG0000449	Tmem198	-1.02968	0.824958	0.944886	chr1:75479058-75485705	transmembrane protein 198	ENSMUSG00000051703	1768.18	1820.71
GSMG0000450	Inha	-1.16163	0.267987	0.702065	chr1:75507077-75510366	inhibin alpha	ENSMUSG00000032968	671.261	779.989
GSMG0000451	Stk11ip	-1.08922	0.382501	0.793776	chr1:75521529-75537334	serine/threonine kinase 11 interacting protein	---	500.234	544.228
GSMG0000457	Sgpp2	1.02808	0.806442	0.938762	chr1:78310157-78420287	sphingosine-1-phosphate phosphatase 2	ENSMUSG00000032908	3442.89	3348.77
GSMG0000461	Acsl3 // Utp14b	1.01051	0.854829	0.948986	chr1:78657823-78707743	acyl-CoA synthetase long-chain family member 3 // UTP14B small subunit processome component	---	3805.42	3765.69
GSMG0000464	Mrpl44	1.31976	0.00359903	0.0575881	chr1:79776018-79781445	mitochondrial ribosomal protein L44	ENSMUSG00000026248	2915.97	2209.62
GSMG0000467	Nyap2	-1.57173	0.00743935	0.0885862	chr1:81076948-81341764	neuronal tyrosine-phophorylated phosphoinositide 3-kinase adaptor 2	---	574.434	903.463
GSMG0000471	Rhbdd1	-1.02029	0.918728	0.969193	chr1:82316579-82445364	rhomboid domain containing 1	---	144.636	147.258
GSMG0000475	Mff	1.2958	0.013068	0.125639	chr1:82724890-82752390	mitochondrial fission factor	---	35864.1	27677.1
GSMG0000478	Agfg1	1.12179	0.129223	0.486211	chr1:82839460-82901182	ArfGAP with FG repeats 1	---	3008.58	2681.72
GSMG0000485	Fbxo36	1.16196	0.418807	0.808605	chr1:84839841-84900486	F-box protein 36	ENSMUSG00000073633	195.035	168.119
GSMG0000493	Cab39	1.03102	0.663643	0.905642	chr1:85793441-85851577	calcium binding protein 39	---	21002.3	20369.7
GSMG0000496	Itm2c	1.22922	0.0953073	0.408604	chr1:85894510-85908702	integral membrane protein 2C	ENSMUSG00000026223	72500.1	58980.6
GSMG0000499	2810459M11Rik	1.26909	0.0608106	0.313174	chr1:86045863-86055455	RIKEN cDNA 2810459M11 gene	---	366.248	288.754
GSMG0000500	Psmd1	1.08813	0.243508	0.674715	chr1:86064618-86139295	proteasome (prosome, macropain) 26S subunit, non-ATPase, 1	ENSMUSG00000026229	10526.9	9674.25
GSMG0000502	Armc9	1.0193	0.792874	0.931021	chr1:86154780-86278284	armadillo repeat containing 9	---	1485.54	1456.95
GSMG0000505	C130036L24Rik	1.03538	0.897762	0.958224	chr1:86359046-86373791	RIKEN cDNA C130036L24 gene	---	50.1491	48.6245
GSMG0000508	Ptma	1.13674	0.151049	0.530215	chr1:86526557-86530712	prothymosin alpha	ENSMUSG00000026238	16625.3	14625.5
GSMG0000510	Cops7b	1.07717	0.439575	0.827735	chr1:86582921-86609375	COP9 signalosome subunit 7B	ENSMUSG00000026240	1122.63	1041.59
GSMG0000512	Dis3l2	-1.08947	0.437215	0.825755	chr1:86703803-87050097	DIS3 like 3'-5' exoribonuclease 2	---	828.479	903.059
GSMG0000526	Eif4e2	1.19246	0.00598416	0.0781234	chr1:87213910-87240488	eukaryotic translation initiation factor 4E member 2	---	3333.81	2795.89
GSMG0000527	Efhd1	-1.05471	0.796657	0.933568	chr1:87264353-87310841	EF hand domain containing 1	ENSMUSG00000026255	140.929	148.683
GSMG0000528	Gigyf2	-1.33937	0.026614	0.193453	chr1:87326998-87450810	GRB10 interacting GYF protein 2	---	1073.68	1438.1
GSMG0000531	Neu2	-1.2257	0.2341	0.665298	chr1:87574026-87597845	neuraminidase 2	---	226.87	278.757
GSMG0000533	Inpp5d	-1.80545	0.0193804	0.159163	chr1:87620312-87720510	inositol polyphosphate-5-phosphatase D	---	93.6127	168.768
GSMG0000535	Atg16l1	1.0347	0.733301	0.905642	chr1:87756011-87792429	autophagy related 16-like 1 (S. cerevisiae)	---	1002.83	968.947
GSMG0000540	Dgkd	-1.02659	0.798185	0.934439	chr1:87853287-87945180	diacylglycerol kinase, delta	ENSMUSG00000070738	1176.04	1207.09
GSMG0000550	Sh3bp4	-1.07482	0.512651	0.845039	chr1:89070414-89155087	SH3-domain binding protein 4	ENSMUSG00000036206	6966.66	7487.96
GSMG0000552	Agap1	-1.70418	0.000667722	0.0211752	chr1:89454805-89897617	ArfGAP with GTPase domain, ankyrin repeat and PH domain 1	---	2124.68	3621.32
GSMG0000561	Ackr3	1.03076	0.797726	0.934364	chr1:90203980-90216288	atypical chemokine receptor 3	ENSMUSG00000044337	405.189	393.166
GSMG0000565	Cops8	1.28902	0.0016626	0.0362806	chr1:90602972-90613341	COP9 signalosome subunit 8	ENSMUSG00000034432	21913.5	17000
GSMG0000569	Lrrfip1	-1.20271	0.156734	0.541923	chr1:90998727-91128944	leucine rich repeat (in FLII) interacting protein 1	---	781.255	939.505
GSMG0000571	Ramp1	1.31826	0.077356	0.360545	chr1:91179822-91225196	receptor (calcitonin) activity modifying protein 1	---	3864.78	2931.74
GSMG0000576	Scly	-1.03935	0.642308	0.905642	chr1:91298335-91321080	selenocysteine lyase	ENSMUSG00000026307	5645.35	5867.6
GSMG0000578	Klhl30	1.05023	0.617595	0.905642	chr1:91351016-91362414	kelch-like 30	ENSMUSG00000026308	12228	11643.5
GSMG0000579	Erfe	1.24506	0.48514	0.845039	chr1:91366430-91374216	erythroferrone	ENSMUSG00000047443	45.5065	36.4227
GSMG0000581	Traf3ip1	-1.28119	0.0537121	0.291259	chr1:91494667-91529372	TRAF3 interacting protein 1	---	839.143	1074.83
GSMG0000582	Asb1	1.27999	0.0112143	0.114888	chr1:91540543-91559590	ankyrin repeat and SOCS box-containing 1	---	8123.26	6346.43
GSMG0000592	Gpc1	-1.47747	0.00114621	0.0293092	chr1:92831644-92860779	glypican 1	ENSMUSG00000034220	983.389	1453.46
GSMG0000594	Dusp28	1.06817	0.49888	0.845039	chr1:92906980-92908620	dual specificity phosphatase 28	ENSMUSG00000047067	4209.85	3941.79
GSMG0000596	Capn10	1.1833	0.0879563	0.389504	chr1:92934376-92947948	calpain 10	ENSMUSG00000026270	2102.76	1776.82
GSMG0000604	Ppp1r7	-1.01503	0.847926	0.948986	chr1:93342853-93367618	protein phosphatase 1, regulatory subunit 7	ENSMUSG00000026275	3566.04	3619.4
GSMG0000607	Septin2	-1.00296	0.969782	0.99042	chr1:93478993-93509733	septin 2	ENSMUSG00000026276	1206.59	1210.17
GSMG0000608	Farp2	-1.16097	0.432674	0.821456	chr1:93512077-93621974	FERM, RhoGEF and pleckstrin domain protein 2	ENSMUSG00000034066	382.005	443.437
GSMG0000611	Bok	1.00654	0.983878	0.99329	chr1:93685575-93695769	BCL2-related ovarian killer	ENSMUSG00000026278	676.833	672.524
GSMG0000613	Atg4b	1.11124	0.0977761	0.415414	chr1:93754904-93789795	autophagy related 4B, cysteine peptidase	ENSMUSG00000026280	6411.14	5769.51
GSMG0000615	Ing5	-1.04826	0.754475	0.915295	chr1:93803964-93822101	inhibitor of growth family, member 5	ENSMUSG00000026283	171.805	180.308
GSMG0000616	D2hgdh	1.01418	0.899666	0.959355	chr1:93825239-93852361	D-2-hydroxyglutarate dehydrogenase	---	489.667	483.652
GSMG0000624	Fam174a	1.44534	0.0174037	0.149416	chr1:95313614-95335284	family with sequence similarity 174, member A	ENSMUSG00000051185	5448.01	3769.51
GSMG0000629	Gin1	1.31974	0.00460701	0.0659856	chr1:97770167-97793708	gypsy retrotransposon integrase 1	---	534.818	404.91
GSMG0000641	Cdh20	-1.39939	0.0104936	0.109896	chr1:104768520-104995481	cadherin 20	ENSMUSG00000050840	1146.39	1603.8
GSMG0000645	Gm17634	-1.02892	0.84313	0.948986	chr1:105356005-105361737	predicted gene, 17634	ENSMUSG00000097482	227.01	233.547
GSMG0000647	Relch	-1.0378	0.666414	0.905642	chr1:105663858-105755131	RAB11 binding and LisH domain, coiled-coil and HEAT repeat containing	---	3302.23	3426.7
GSMG0000651	Zcchc2	-1.10736	0.637338	0.905642	chr1:105990405-106034075	zinc finger, CCHC domain containing 2	---	258.51	285.692
GSMG0000652	Phlpp1	-1.26816	0.00780752	0.0912042	chr1:106171865-106394244	PH domain and leucine rich repeat protein phosphatase 1	ENSMUSG00000044340	961.911	1219.16
GSMG0000676	Nifk	1.25429	0.00411123	0.0622185	chr1:118321843-118333831	nucleolar protein interacting with the FHA domain of MKI67	ENSMUSG00000026377	2277.72	1815.95
GSMG0000678	Clasp1	-1.73719	0.00215418	0.0426438	chr1:118389056-118609445	CLIP associating protein 1	---	1077.06	1871.25
GSMG0000689	3110009E18Rik	1.44826	0.0617864	0.315829	chr1:120121185-120188182	RIKEN cDNA 3110009E18 gene	---	83.0108	57.2118
GSMG0000698	Ccdc93	-1.35082	0.0645068	0.324488	chr1:121431049-121506458	coiled-coil domain containing 93	---	371.203	501.323
GSMG0000705	Slc35f5	1.26363	0.0171636	0.148378	chr1:125560595-125595834	solute carrier family 35, member F5	ENSMUSG00000026342	898.821	711.096
GSMG0000707	Mgat5	-1.57948	0.0106653	0.111177	chr1:127204986-127483704	mannoside acetylglucosaminyltransferase 5	ENSMUSG00000036155	1129.24	1783.45
GSMG0000713	---	-1.48551	0.00412009	0.0622631	chr1:127483809-127488333	---	---	7612.49	11308.2
GSMG0000715	Ccnt2	-1.01802	0.891964	0.955553	chr1:127774164-127808058	cyclin T2	ENSMUSG00000026349	306.802	312.083
GSMG0000716	Rab3gap1	1.0541	0.539482	0.857789	chr1:127868773-127943876	RAB3 GTPase activating protein subunit 1	---	8959.8	8499.9
GSMG0000723	R3hdm1	-1.35931	0.0377638	0.236603	chr1:128103299-128237738	R3H domain containing 1	ENSMUSG00000056211	12649	17193.4
GSMG0000725	Ubxn4	-1.23887	0.180821	0.582922	chr1:128244136-128279378	UBX domain protein 4	ENSMUSG00000026353	730.321	904.408
GSMG0000740	Yod1	-1.03319	0.755144	0.915362	chr1:130717326-130722055	YOD1 deubiquitinase	ENSMUSG00000046404	781.292	807.242
GSMG0000741	---	1.19138	0.199532	0.612811	chr1:130722835-130724357	---	---	621.773	521.877
GSMG0000742	AA986860	-1.23529	0.0906709	0.395826	chr1:130731975-130744621	expressed sequence AA986860	ENSMUSG00000042510	245.578	304.064
GSMG0000749	Eif2d	1.17352	0.0715525	0.34475	chr1:131153180-131187658	eukaryotic translation initiation factor 2D	---	2728.97	2325.81
GSMG0000757	Slc41a1	-1.22566	0.060545	0.312265	chr1:131827977-131848861	solute carrier family 41, member 1	ENSMUSG00000013275	418.143	512.115
GSMG0000758	Rab29	1.47216	0.115934	0.456646	chr1:131867264-131872886	RAB29, member RAS oncogene family	ENSMUSG00000026433	66.9791	45.6101
GSMG0000759	Nucks1	1.18164	0.102724	0.427134	chr1:131910458-131936321	nuclear casein kinase and cyclin-dependent kinase substrate 1	---	21847.6	18489.1
GSMG0000762	Elk4	-1.21473	0.0441353	0.26016	chr1:132007607-132032608	ELK4, member of ETS oncogene family	ENSMUSG00000026436	447.604	544.303
GSMG0000766	Lemd1	-1.00993	0.926559	0.972804	chr1:132191429-132259227	LEM domain containing 1	---	1515.63	1531.02
GSMG0000767	Klhdc8a	1.06571	0.5191	0.845039	chr1:132298625-132307357	kelch domain containing 8A	ENSMUSG00000042115	17164	16106
GSMG0000768	Nuak2	-1.35462	0.431394	0.82066	chr1:132316125-132333488	NUAK family, SNF1-like kinase, 2	---	40.7892	55.5747
GSMG0000770	Dstyk	-1.11118	0.230088	0.659839	chr1:132417453-132466959	dual serine/threonine and tyrosine protein kinase	ENSMUSG00000042046	6776.81	7530.54
GSMG0000772	Rbbp5	-1.01027	0.8992	0.959005	chr1:132477361-132505665	retinoblastoma binding protein 5, histone lysine methyltransferase complex subunit	---	2170.76	2193.77
GSMG0000773	Tmem81	-1.48668	0.00910738	0.100429	chr1:132506229-132508652	transmembrane protein 81	---	148.963	220.942
GSMG0000776	Lrrn2	-1.11548	0.31177	0.748446	chr1:132880354-132940005	leucine rich repeat protein 2, neuronal	ENSMUSG00000026443	7260.83	8099.79
GSMG0000777	Pik3c2b	-1.48275	0.0324973	0.217342	chr1:133046010-133108688	phosphatidylinositol-4-phosphate 3-kinase catalytic subunit type 2 beta	ENSMUSG00000026447	697.173	1033.96
GSMG0000778	Ppp1r15b	1.11295	0.296077	0.730131	chr1:133131166-133139800	protein phosphatase 1, regulatory subunit 15B	ENSMUSG00000046062	2017.8	1812.47
GSMG0000780	Plekha6	-1.94456	0.000166454	0.00905568	chr1:133246097-133303435	pleckstrin homology domain containing, family A member 6	---	296.344	576.138
GSMG0000783	Etnk2	-1.33127	0.424622	0.814401	chr1:133363572-133380318	ethanolamine kinase 2	ENSMUSG00000070644	24.284	32.5145
GSMG0000789	Fmod	-1.38036	0.542897	0.859623	chr1:134037254-134048280	fibromodulin	ENSMUSG00000041559	94.8458	130.949
GSMG0000791	Chil1	1.46498	0.018899	0.157262	chr1:134182156-134190031	chitinase-like 1	ENSMUSG00000064246	127.82	87.3852
GSMG0000796	Cyb5r1	1.3483	0.000282489	0.0123973	chr1:134400361-134411738	cytochrome b5 reductase 1	---	2692.99	1997.21
GSMG0000797	Adipor1	1.22458	0.0181663	0.153417	chr1:134415378-134433348	adiponectin receptor 1	---	12313.4	10055.3
GSMG0000799	Klhl12	-1.00152	0.987481	0.994922	chr1:134455529-134491018	kelch-like 12	---	889.084	890.284
GSMG0000800	Rabif	1.15746	0.040915	0.248802	chr1:134494639-134509874	RAB interacting factor	ENSMUSG00000042229	3447.65	2978.92
GSMG0000801	Kdm5b	-1.11394	0.338004	0.760358	chr1:134560171-134635285	lysine (K)-specific demethylase 5B	ENSMUSG00000042207	1184.76	1319.92
GSMG0000804	Syt2	-1.07608	0.766157	0.920228	chr1:134646612-134753147	synaptotagmin II	---	69.2718	74.7331
GSMG0000806	Ube2t	1.73186	0.00863744	0.0974928	chr1:134962565-134974180	ubiquitin-conjugating enzyme E2T	ENSMUSG00000026429	110.883	63.9263
GSMG0000809	Arl8a	1.19047	0.0252366	0.186929	chr1:135146834-135156268	ADP-ribosylation factor-like 8A	ENSMUSG00000026426	50274.4	42230.5
GSMG0000815	Csrp1	1.02148	0.840039	0.948986	chr1:135720061-135752230	cysteine and glycine-rich protein 1	---	1537.24	1505.12
GSMG0000816	Phlda3	1.20369	0.170933	0.565883	chr1:135766085-135769133	pleckstrin homology like domain, family A, member 3	ENSMUSG00000041801	688.947	572.391
GSMG0000820	Tnnt2	1.17589	0.186794	0.592906	chr1:135836334-135852268	troponin T2, cardiac	---	1101.49	936.504
GSMG0000821	Tmem9	1.28265	0.0178884	0.15202	chr1:136008219-136035030	transmembrane protein 9	---	12473.1	9724.57
GSMG0000822	Cacna1s	-1.20767	0.349061	0.774181	chr1:136052784-136119822	calcium channel, voltage-dependent, L type, alpha 1S subunit	---	103.888	125.138
GSMG0000824	Kif21b	-1.70875	0.00300834	0.0520709	chr1:136131390-136178001	kinesin family member 21B	---	452.867	774.422
GSMG0000829	Ddx59	1.28131	0.021078	0.167488	chr1:136415270-136440220	DEAD box helicase 59	ENSMUSG00000026404	556.851	434.115
GSMG0000833	Zfp281	-1.06013	0.536426	0.855559	chr1:136624901-136630391	zinc finger protein 281	---	2067.98	2191.59
GSMG0000848	Dennd1b	-1.24849	0.130563	0.488995	chr1:138963709-139178960	DENN/MADD domain containing 1B	---	798.068	996.053
GSMG0000857	Zbtb41	-1.1362	0.356038	0.780038	chr1:139422381-139453007	zinc finger and BTB domain containing 41	ENSMUSG00000033964	353.728	401.169
GSMG0000864	B3galt2	1.2129	0.0682747	0.335358	chr1:143640695-143654612	UDP-Gal:betaGlcNAc beta 1,3-galactosyltransferase, polypeptide 2	ENSMUSG00000033849	2540.46	2093.66
GSMG0000866	Glrx2	1.08516	0.409518	0.799604	chr1:143716338-143749678	glutaredoxin 2 (thioltransferase)	---	5004.46	4611.54
GSMG0000867	Uchl5	1.16708	0.0878245	0.389088	chr1:143777278-143807466	ubiquitin carboxyl-terminal esterase L5	---	3083.68	2641.71
GSMG0000868	---	-1.10305	0.397423	0.793776	chr1:143778110-143781304	---	---	752.285	829.862
GSMG0000869	Brinp3	-1.05932	0.923384	0.971646	chr1:146494758-146902472	bone morphogenetic protein/retinoic acid inducible neural specific 3	---	306.041	324.244
GSMG0000876	Tpr	-4.44298	0.000908945	0.0254495	chr1:150392835-150449935	translocated promoter region, nuclear basket protein	ENSMUSG00000006005	72.1631	320.734
GSMG0000880	Ivns1abp	1.0898	0.315696	0.750602	chr1:151344486-151364445	influenza virus NS1A binding protein	---	4872.13	4470.28
GSMG0000882	Trmt1l	1.03723	0.727997	0.905642	chr1:151428541-151458183	tRNA methyltransferase 1 like	ENSMUSG00000053286	1459.53	1406.38
GSMG0000885	Edem3	-1.07502	0.612747	0.905642	chr1:151755371-151822328	ER degradation enhancer, mannosidase alpha-like 3	---	1304.68	1402.28
GSMG0000889	Colgalt2	-1.17182	0.238021	0.668999	chr1:152399828-152511187	collagen beta(1-O)galactosyltransferase 2	ENSMUSG00000032649	224.421	262.905
GSMG0000892	Arpc5	1.27598	0.119558	0.464524	chr1:152766542-152775580	actin related protein 2/3 complex, subunit 5	ENSMUSG00000008475	10132	7940.67
GSMG0000896	Nmnat2	-1.30878	0.0496294	0.27876	chr1:152954990-153119265	nicotinamide nucleotide adenylyltransferase 2	ENSMUSG00000042751	2277.25	2980.05
GSMG0000899	Rgs8	-1.24517	0.16542	0.558073	chr1:153653037-153697667	regulator of G-protein signaling 8	---	113.895	141.934
GSMG0000901	Rgs16	-1.351	0.0345389	0.224988	chr1:153740351-153745468	regulator of G-protein signaling 16	ENSMUSG00000026475	516.879	697.944
GSMG0000902	Rnasel	-1.35218	0.0286571	0.202292	chr1:153749425-153764221	ribonuclease L (2', 5'-oligoisoadenylate synthetase-dependent)	ENSMUSG00000066800	444.434	600.646
GSMG0000905	Glul	1.07049	0.537272	0.856112	chr1:153899929-153909721	glutamate-ammonia ligase (glutamine synthetase)	ENSMUSG00000026473	10725.8	10019.8
GSMG0000909	Stx6	1.06557	0.459589	0.842219	chr1:155158703-155208256	syntaxin 6	---	2550.46	2393.89
GSMG0000910	Acbd6	1.16381	0.0461881	0.267143	chr1:155558117-155687233	acyl-Coenzyme A binding domain containing 6	---	5981.97	5139.97
GSMG0000915	Tor1aip2	1.23378	0.0186023	0.15545	chr1:156035402-156068861	torsin A interacting protein 2	---	6615.47	5361.54
GSMG0000921	---	1.44769	0.0536047	0.290876	chr1:156525611-156526662	---	---	629.825	434.8
GSMG0000922	Abl2	-1.35131	0.00594539	0.0777459	chr1:156558787-156649619	v-abl Abelson murine leukemia viral oncogene 2 (arg, Abelson-related gene)	---	2592.49	3502.99
GSMG0000932	2810025M15Rik	1.17563	0.17544	0.573601	chr1:157412352-157420236	RIKEN cDNA 2810025M15 gene	ENSMUSG00000049881	857.887	729.404
GSMG0000935	Astn1	-1.31036	0.0208783	0.166741	chr1:158362304-158691786	astrotactin 1	---	6381.07	8362.07
GSMG0000938	Cop1	1.12149	0.265958	0.700679	chr1:159232200-159354872	COP1, E3 ubiquitin ligase	ENSMUSG00000040782	2401.25	2141.29
GSMG0000941	Tnr	-1.90285	0.000952113	0.026079	chr1:159523768-159925292	tenascin R	ENSMUSG00000015829	1166.63	2220.45
GSMG0000944	---	-2.20376	0.000123848	0.00764634	chr1:159930183-159931726	---	---	361.595	797.238
GSMG0000946	Mrps14	1.41409	0.0015678	0.0351853	chr1:160195215-160202170	mitochondrial ribosomal protein S14	---	10748.9	7601.39
GSMG0000950	Rc3h1	-1.30077	0.00711722	0.086243	chr1:160906411-160974976	RING CCCH (C3H) domains 1	ENSMUSG00000040423	2267.6	2950.21
GSMG0000957	Gas5	1.184	0.242123	0.672767	chr1:161034601-161038539	growth arrest specific 5	ENSMUSG00000053332	2111.81	1783.64
GSMG0000960	Ankrd45	1.09442	0.189282	0.597141	chr1:161142697-161170507	ankyrin repeat domain 45	---	2349.53	2147.14
GSMG0000965	Pigc	1.22661	0.0333924	0.220855	chr1:161969188-161973435	phosphatidylinositol glycan anchor biosynthesis, class C	---	1271	1036.09
GSMG0000969	Vamp4	1.12193	0.23239	0.662541	chr1:162570515-162599082	vesicle-associated membrane protein 4	---	6784.33	6047.17
GSMG0000973	Kifap3	-1.01433	0.852163	0.948986	chr1:163779581-163917106	kinesin-associated protein 3	---	19898.3	20183.4
GSMG0000977	Scyl3	-1.25562	0.0726351	0.34792	chr1:163929098-163955126	SCY1-like 3 (S. cerevisiae)	---	365.029	458.387
GSMG0000978	Mettl18	1.50017	0.000638233	0.0206764	chr1:163994887-163997312	methyltransferase like 18	---	705.084	470.112
GSMG0000983	Slc19a2	1.15157	0.191948	0.600822	chr1:164249045-164265385	solute carrier family 19 (thiamine transporter), member 2	---	323.998	281.34
GSMG0000984	Ccdc181	-1.07305	0.417289	0.807107	chr1:164275598-164287845	coiled-coil domain containing 181	ENSMUSG00000026578	992.047	1064.87
GSMG0000986	Nme7	1.10341	0.327725	0.750602	chr1:164304120-164437725	NME/NM23 family member 7	---	657.824	596.195
GSMG0000994	Gpr161	-1.47989	0.0391609	0.242196	chr1:165295766-165326745	G protein-coupled receptor 161	---	190.658	282.528
GSMG0000997	Mpc2	1.43082	0.00181469	0.0384299	chr1:165460636-165481218	mitochondrial pyruvate carrier 2	ENSMUSG00000026568	15330.5	10714.5
GSMG0001002	Creg1	1.00921	0.912259	0.965889	chr1:165763758-165775305	cellular repressor of E1A-stimulated genes 1	---	7595.69	7526.26
GSMG0001009	Ildr2	-1.61773	0.12442	0.474664	chr1:166254139-166316832	immunoglobulin-like domain containing receptor 2	---	100.878	163.395
GSMG0001012	Tada1	1.09036	0.309866	0.74649	chr1:166379167-166393618	transcriptional adaptor 1	ENSMUSG00000026563	1897.51	1740.51
GSMG0001013	Fam78b	-1.18092	0.0893879	0.393546	chr1:167001417-167091302	family with sequence similarity 78, member B	---	755.882	891.856
GSMG0001018	Tmco1	1.3154	0.00692298	0.0847682	chr1:167308386-167333978	transmembrane and coiled-coil domains 1	ENSMUSG00000052428	3414.42	2595.73
GSMG0001019	Aldh9a1	1.09646	0.215375	0.637184	chr1:167349990-167368530	aldehyde dehydrogenase 9, subfamily A1	ENSMUSG00000026687	1774.98	1618.23
GSMG0001021	Rxrg	1.22518	0.771105	0.922954	chr1:167598362-167639623	retinoid X receptor gamma	---	137.163	111.97
GSMG0001023	Rgs5	-1.15802	0.18193	0.584822	chr1:169655499-169695813	regulator of G-protein signaling 5	---	356.005	412.585
GSMG0001025	3110045C21Rik	-1.10294	0.700923	0.905642	chr1:169969408-169972396	RIKEN cDNA 3110045C21 gene	ENSMUSG00000097503	49.7727	54.6866
GSMG0001036	Cfap126	-1.07907	0.781667	0.92702	chr1:171113986-171126950	cilia and flagella associated protein 126	ENSMUSG00000026649	175.812	189.841
GSMG0001039	Apoa2	1.74916	3.42724e-05	0.00330713	chr1:171221564-171226379	apolipoprotein A-II	---	293.367	167.366
GSMG0001041	B4galt3	1.07806	0.458644	0.841584	chr1:171270328-171276896	UDP-Gal:betaGlcNAc beta 1,4-galactosyltransferase, polypeptide 3	ENSMUSG00000052423	1211.68	1124.15
GSMG0001042	Dedd	1.15972	0.154561	0.537707	chr1:171328808-171342501	death effector domain-containing	---	1514.59	1306.12
GSMG0001043	Pfdn2	1.3948	0.00169299	0.0367397	chr1:171344954-171359254	prefoldin 2	---	14293.9	10247.9
GSMG0001046	Nectin4	-1.11509	0.491831	0.845039	chr1:171370098-171388598	nectin cell adhesion molecule 4	---	211.551	236.115
GSMG0001048	Usf1	1.02506	0.733276	0.905642	chr1:171411313-171418758	upstream transcription factor 1	---	3583.47	3496.31
GSMG0001049	F11r	1.13057	0.333382	0.754196	chr1:171437560-171464593	F11 receptor	ENSMUSG00000038235	289.039	255.926
GSMG0001050	Alyref2	1.11164	0.377202	0.793776	chr1:171503477-171504750	Aly/REF export factor 2	ENSMUSG00000060244	585.97	527.76
GSMG0001059	Copa	1.00743	0.941425	0.980376	chr1:172082529-172122332	coatomer protein complex subunit alpha	ENSMUSG00000026553	27415.7	27213.1
GSMG0001060	Pex19	1.15405	0.049462	0.278253	chr1:172126754-172136497	peroxisomal biogenesis factor 19	---	8030.03	6958.29
GSMG0001061	Dcaf8	-1.03008	0.640973	0.905642	chr1:172148015-172197326	DDB1 and CUL4 associated factor 8	---	7239.96	7458.12
GSMG0001063	Igsf8	-1.01866	0.875729	0.948986	chr1:172261631-172319848	immunoglobulin superfamily, member 8	ENSMUSG00000038034	12675.8	12912.9
GSMG0001064	Kcnj10	-1.70543	0.0126866	0.123783	chr1:172341207-172374085	potassium inwardly-rectifying channel, subfamily J, member 10	ENSMUSG00000044708	97.9773	166.868
GSMG0001099	Fmn2	-1.23971	0.178345	0.578545	chr1:174501825-174822717	formin 2	ENSMUSG00000028354	893.727	1107.72
GSMG0001110	Sdccag8	-1.16415	0.295447	0.729787	chr1:176814660-177020438	serologically defined colon cancer antigen 8	---	490.427	570.246
GSMG0001117	Zbtb18	-1.07984	0.666904	0.905642	chr1:177442351-177450764	zinc finger and BTB domain containing 18	---	3854.08	4161.83
GSMG0001122	---	-1.31365	0.0480959	0.273543	chr1:177987293-177990444	---	---	198.467	260.233
GSMG0001123	Desi2	1.04536	0.606896	0.905148	chr1:178187417-178252598	desumoylating isopeptidase 2	---	1089.63	1041.67
GSMG0001128	Cox20	1.1891	0.150563	0.529324	chr1:178319153-178322693	cytochrome c oxidase assembly protein 20	ENSMUSG00000026500	1356.47	1140.51
GSMG0001129	---	1.05141	0.731097	0.905642	chr1:178339601-178341470	---	---	270.061	257.205
GSMG0001130	Efcab2	-1.11369	0.304963	0.73925	chr1:178405881-178484513	EF-hand calcium binding domain 2	ENSMUSG00000026495	1430.44	1592.69
GSMG0001135	---	-1.58934	0.00551063	0.0735855	chr1:178934425-178939199	---	---	921.564	1464.68
GSMG0001137	Cnst	1.00826	0.935204	0.977424	chr1:179546439-179627474	consortin, connexin sorting protein	ENSMUSG00000038949	5119.1	5076.75
GSMG0001138	Sccpdh	1.36544	0.00343111	0.0561849	chr1:179668208-179687188	saccharopine dehydrogenase (putative)	ENSMUSG00000038936	10694.4	7832.32
GSMG0001140	Cdc42bpa	-1.91331	0.000813856	0.0240559	chr1:179960777-180165603	CDC42 binding protein kinase alpha	---	1306.78	2500.1
GSMG0001144	Lin9	1.143	0.446637	0.833401	chr1:179979305-180690685	lin-9 homolog (C. elegans)	---	92.2926	80.5233
GSMG0001145	Itpkb	-1.19508	0.241696	0.672378	chr1:180330476-180423659	inositol 1,4,5-trisphosphate 3-kinase B	ENSMUSG00000038855	502.518	600.761
GSMG0001149	---	-1.19135	0.388234	0.793776	chr1:180424512-180424798	---	---	108.741	130
GSMG0001150	Parp1	-1.21538	0.111827	0.447505	chr1:180568891-180601253	poly (ADP-ribose) polymerase family, member 1	ENSMUSG00000026496	10241.3	12447.1
GSMG0001151	Acbd3	-1.0688	0.575023	0.884526	chr1:180726042-180754203	acyl-Coenzyme A binding domain containing 3	ENSMUSG00000026499	1754.82	1875.31
GSMG0001155	Sde2	1.08048	0.464275	0.845039	chr1:180851125-180868111	SDE2 telomere maintenance homolog (S. pombe)	ENSMUSG00000038806	1206.7	1116.81
GSMG0001157	Pycr2	1.16578	0.168199	0.561751	chr1:180904274-180908087	pyrroline-5-carboxylate reductase family, member 2	ENSMUSG00000026520	1992.44	1709.76
GSMG0001163	Cnih4	1.32606	0.00227384	0.0439637	chr1:181150931-181168992	cornichon family AMPA receptor auxiliary protein 4	ENSMUSG00000062169	3587.9	2705.24
GSMG0001165	Cnih3	-1.04211	0.801773	0.936589	chr1:181352627-181460641	cornichon family AMPA receptor auxiliary protein 3	---	5001.11	5211.82
GSMG0001170	Srp9	1.34543	0.00914203	0.100617	chr1:182124737-182132415	signal recognition particle 9	ENSMUSG00000026511	13639.3	10137.7
GSMG0001173	Trp53bp2	-1.33146	0.0751019	0.355128	chr1:182409167-182462436	transformation related protein 53 binding protein 2	ENSMUSG00000026510	1840.6	2450.38
GSMG0001178	Susd4	-1.00544	0.926633	0.972849	chr1:182764044-182896580	sushi domain containing 4	---	8644	8691.26
GSMG0001182	Dusp10	-1.54662	0.155858	0.540375	chr1:184034381-184075636	dual specificity phosphatase 10	ENSMUSG00000039384	46.01	71.5605
GSMG0001192	Rab3gap2	-1.12808	0.281243	0.711188	chr1:185204168-185286745	RAB3 GTPase activating protein subunit 2	---	2877.13	3245.45
GSMG0001195	Bpnt1	1.13579	0.0757445	0.356422	chr1:185332153-185357777	3'(2'), 5'-bisphosphate nucleotidase 1	---	6572.17	5786.48
GSMG0001196	Eprs	-1.53664	0.0220746	0.172412	chr1:185363043-185428360	glutamyl-prolyl-tRNA synthetase	ENSMUSG00000026615	449.942	691.456
GSMG0001197	Slc30a10	-1.33993	0.609219	0.905642	chr1:185454847-185468762	solute carrier family 30, member 10	ENSMUSG00000026614	95.6868	128.223
GSMG0001205	Gpatch2	-1.06761	0.623732	0.905642	chr1:187215507-187351427	G patch domain containing 2	---	535.167	570.889
GSMG0001218	A430027H14Rik	-1.00602	0.983368	0.993157	chr1:189343051-189344892	RIKEN cDNA A430027H14 gene	---	36.7363	36.8711
GSMG0001225	Angel2	1.08463	0.298832	0.732795	chr1:190925108-190946963	angel homolog 2	---	3366.64	3103.67
GSMG0001230	D730003I15Rik	2.01869	6.67608e-05	0.00513798	chr1:191224454-191226063	RIKEN cDNA D730003I15 gene	---	175.694	87.0803
GSMG0001233	Pacc1	-1.10525	0.432301	0.821093	chr1:191325902-191352925	proton activated chloride channel 1	ENSMUSG00000026627	267.973	295.738
GSMG0001236	Ints7	-1.1959	0.112321	0.448343	chr1:191575636-191623690	integrator complex subunit 7	ENSMUSG00000037461	459.804	550.066
GSMG0001238	Lpgat1	-1.2229	0.117662	0.460734	chr1:191718023-191784255	lysophosphatidylglycerol acyltransferase 1	---	2724.15	3331.01
GSMG0001241	Nek2	1.36619	0.385187	0.793776	chr1:191821473-191833049	NIMA (never in mitosis gene a)-related expressed kinase 2	ENSMUSG00000026622	46.0815	33.9038
GSMG0001242	Slc30a1	-1.17012	0.186514	0.592668	chr1:191906781-191913247	solute carrier family 30 (zinc transporter), member 1	ENSMUSG00000037434	340.444	398.915
GSMG0001243	Rd3	-1.3452	0.58474	0.893366	chr1:191977370-191988282	retinal degeneration 3	---	527.279	709.383
GSMG0001246	Gm10516	1.15201	0.239633	0.670176	chr1:192136897-192151025	predicted gene 10516	ENSMUSG00000097316	547.641	475.239
GSMG0001247	Kcnh1	-1.99317	0.274821	0.706334	chr1:192190777-192510158	potassium voltage-gated channel, subfamily H (eag-related), member 1	---	159.94	318.867
GSMG0001256	Plxna2	-1.81803	0.000790149	0.0236041	chr1:194619829-194816853	plexin A2	ENSMUSG00000026640	389.984	708.829
GSMG0001281	Mrpl15	1.34539	0.00635542	0.0810857	chr1:4773202-4785728	mitochondrial ribosomal protein L15	---	7567.57	5624.95
GSMG0001284	Rgs20	1.13691	0.12105	0.467483	chr1:4909576-5070285	regulator of G-protein signaling 20	---	1919.47	1687.85
GSMG0001292	Sntg1	-1.06984	0.555757	0.870161	chr1:8359734-9299878	syntrophin, gamma 1	---	512.359	548.202
GSMG0001299	Mybl1	-1.13294	0.428619	0.818223	chr1:9667411-9700209	myeloblastosis oncogene-like 1	---	110.976	125.9
GSMG0001300	Vcpip1	-1.01413	0.883896	0.951518	chr1:9718622-9748387	valosin containing protein (p97)/p47 complex interacting protein 1	ENSMUSG00000045210	5977.26	6061.58
GSMG0001301	Snhg6	1.51827	0.00622622	0.0798302	chr1:9942025-9944119	small nucleolar RNA host gene 6	ENSMUSG00000098234	1357.39	894.105
GSMG0001302	Tcf24	1.37624	0.0899906	0.394803	chr1:9960163-9967810	transcription factor 24	ENSMUSG00000099032	456.852	332.311
GSMG0001304	Cops5	1.23318	0.00460095	0.0659302	chr1:10024600-10038159	COP9 signalosome subunit 5	ENSMUSG00000025917	10868.3	8813.05
GSMG0001313	Cpa6	-1.02415	0.896734	0.957711	chr1:10324719-10719946	carboxypeptidase A6	ENSMUSG00000042501	156.178	160.367
GSMG0001318	Slco5a1	-1.15758	0.25602	0.689122	chr1:12866552-12991179	solute carrier organic anion transporter family, member 5A1	---	558.9	646.266
GSMG0001329	Tram1	1.21872	0.100244	0.421974	chr1:13564693-13589897	translocating chain-associating membrane protein 1	ENSMUSG00000025935	676.715	554.778
GSMG0001332	Lactb2	1.20415	0.0792588	0.36574	chr1:13625898-13660537	lactamase, beta 2	ENSMUSG00000025937	497.866	413.12
GSMG0001335	Eya1	1.02899	0.869228	0.948986	chr1:14168954-14310206	EYA transcriptional coactivator and phosphatase 1	---	218.729	212.062
GSMG0001342	Rpl7	1.36534	0.00312632	0.0531795	chr1:16101295-16104433	ribosomal protein L7	ENSMUSG00000043716	27163.3	19894.8
GSMG0001345	Stau2	1.03147	0.732692	0.905642	chr1:16228810-16519302	staufen double-stranded RNA binding protein 2	---	4967.3	4814.83
GSMG0001350	---	1.32034	0.029509	0.204734	chr1:16566010-16567833	---	---	920.28	697.082
GSMG0001351	Ube2w	1.39258	0.00552617	0.0737306	chr1:16540790-16619312	ubiquitin-conjugating enzyme E2W (putative)	---	10993.8	7894.49
GSMG0001354	Eloc	1.28014	0.0483712	0.274318	chr1:16641726-16657119	elongin C	---	14997.3	11715.4
GSMG0001357	Jph1	-1.4267	0.479605	0.845039	chr1:16994938-17097889	junctophilin 1	ENSMUSG00000042686	135.687	193.663
GSMG0001398	Ogfrl1	1.09478	0.348711	0.773819	chr1:23366424-23383201	opioid growth factor receptor-like 1	ENSMUSG00000026158	19391.6	17712.6
GSMG0001400	Smap1	1.02324	0.778694	0.925458	chr1:23844825-23922381	small ArfGAP 1	---	14274.7	13950
GSMG0001402	Sdhaf4	1.49121	0.000533356	0.0184534	chr1:23995939-24005641	succinate dehydrogenase complex assembly factor 4	ENSMUSG00000026154	5217.5	3498.98
GSMG0001403	Fam135a	-1.16557	0.156639	0.541782	chr1:24010758-24100342	family with sequence similarity 135, member A	---	520.439	606.988
GSMG0001416	Adgrb3	1.26361	0.00910951	0.100429	chr1:25067476-25829707	adhesion G protein-coupled receptor B3	---	3590.36	2840.85
GSMG0001435	Phf3	-1.91847	0.000242384	0.0113643	chr1:30802342-30873873	PHD finger protein 3	---	1274.32	2444.72
GSMG0001441	Prim2	1.04381	0.647179	0.905642	chr1:33453808-33669794	DNA primase, p58 subunit	ENSMUSG00000026134	513.003	491.389
GSMG0001444	Bag2	1.18187	0.206894	0.62496	chr1:33745484-33757750	BCL2-associated athanogene 2	ENSMUSG00000042215	519.551	439.408
GSMG0001445	Zfp451	1.11734	0.172513	0.569212	chr1:33761541-33814595	zinc finger protein 451	---	3016.06	2698.96
GSMG0001446	Gm15455	-1.13863	0.308822	0.744992	chr1:33835883-33839662	predicted gene 15455	ENSMUSG00000081402	435.015	495.111
GSMG0001447	Bend6	1.18707	0.0753823	0.35592	chr1:33852055-33907791	BEN domain containing 6	---	3633.39	3060.9
GSMG0001454	Ccdc115	1.08615	0.369144	0.789478	chr1:34436671-34439672	coiled-coil domain containing 115	ENSMUSG00000042111	2693.67	2480.44
GSMG0001461	Fam168b	-1.07504	0.274675	0.706334	chr1:34813219-34843050	family with sequence similarity 168, member B	---	33840.2	36379.2
GSMG0001463	Uggt1	1.05772	0.67135	0.905642	chr1:36140029-36244720	UDP-glucose glycoprotein glucosyltransferase 1	ENSMUSG00000037470	3926.16	3711.48
GSMG0001466	Kansl3	-1.59807	0.00193514	0.0399094	chr1:36335730-36369182	KAT8 regulatory NSL complex subunit 3	---	2215.67	3540.97
GSMG0001469	Lman2l	-1.0324	0.695899	0.905642	chr1:36418800-36445271	lectin, mannose-binding 2-like	---	845.215	872.131
GSMG0001472	Sema4c	1.08107	0.363602	0.784266	chr1:36548639-36558381	sema domain, immunoglobulin domain (Ig), transmembrane domain (TM) and short cytoplasmic domain, (semaphorin) 4C	---	630.255	583.477
GSMG0001475	Actr1b	1.01172	0.851702	0.948986	chr1:36698114-36709959	ARP1 actin-related protein 1B, centractin beta	ENSMUSG00000037351	36134.8	35715.7
GSMG0001477	Tmem131	-1.78765	0.000292869	0.012593	chr1:36792191-36939528	transmembrane protein 131	ENSMUSG00000026116	907.942	1623.16
GSMG0001484	Coa5	1.36227	0.00557292	0.0741598	chr1:37417085-37430103	cytochrome C oxidase assembly factor 5	ENSMUSG00000026112	8971.46	6585.63
GSMG0001486	Mgat4a	-1.10769	0.212691	0.633598	chr1:37439340-37541016	mannoside acetylglucosaminyltransferase 4, isoenzyme A	---	1807.23	2001.16
GSMG0001489	Cracdl	-1.76025	0.00710353	0.0861433	chr1:37611676-37719811	capping protein inhibiting regulator of actin like	ENSMUSG00000026090	566.212	997.114
GSMG0001491	Tsga10	1.21824	0.14569	0.520371	chr1:37754572-37865300	testis specific 10	---	307.628	252.063
GSMG0001492	Mitd1	1.16322	0.3345	0.755846	chr1:37874801-37890412	MIT, microtubule interacting and transport, domain containing 1	---	293.051	251.604
GSMG0001495	Txndc9	1.34816	0.00153279	0.0348244	chr1:37983867-37997263	thioredoxin domain containing 9	---	4110.71	3049.39
GSMG0001496	Rev1	-1.24738	0.111468	0.447205	chr1:38052786-38129668	REV1, DNA directed polymerase	---	504.854	629.565
GSMG0001498	Aff3	-1.50317	0.000161528	0.00897705	chr1:38175991-38664956	AF4/FMR2 family, member 3	ENSMUSG00000037138	1830	2751.66
GSMG0001513	Chst10	1.2053	0.0185156	0.155054	chr1:38863872-38898163	carbohydrate sulfotransferase 10	ENSMUSG00000026080	1745.84	1447.72
GSMG0001517	Tbc1d8	-1.45331	0.0133532	0.127719	chr1:39371495-39478755	TBC1 domain family, member 8	---	559.772	814.144
GSMG0001519	Creg2	-1.81756	0.000128991	0.00780644	chr1:39618406-39651479	cellular repressor of E1A-stimulated genes 2	ENSMUSG00000050967	3290.92	5981.46
GSMG0001523	---	-1.48303	0.139806	0.508955	chr1:40049061-40050370	---	---	81.1841	119.875
GSMG0001524	Gm16894	-1.5026	0.0518281	0.284796	chr1:40076212-40085853	predicted gene, 16894	ENSMUSG00000097899	65.0002	97.3216
GSMG0001527	---	1.10441	0.448867	0.834378	chr1:40680581-40681460	---	---	302.428	273.24
GSMG0001528	Mfsd9	1.01947	0.854646	0.948986	chr1:40772040-40790688	major facilitator superfamily domain containing 9	ENSMUSG00000041945	1007.44	988.65
GSMG0001531	Pantr1	1.22223	0.0388536	0.240966	chr1:42590784-42694830	POU domain, class 3, transcription factor 3 adjacent noncoding transcript 1	ENSMUSG00000060424	4250.14	3477.24
GSMG0001533	Tgfbrap1	-1.18872	0.234742	0.666094	chr1:43047200-43098637	transforming growth factor, beta receptor associated protein 1	---	1510.35	1795.45
GSMG0001534	Fhl2	1.01637	0.955209	0.986833	chr1:43123071-43196762	four and a half LIM domains 2	---	1622.45	1596.4
GSMG0001538	Uxs1	1.13523	0.176678	0.575444	chr1:43746961-43827839	UDP-glucuronate decarboxylase 1	ENSMUSG00000057363	1262.44	1111.79
GSMG0001540	Tex30	1.1386	0.38038	0.793776	chr1:44086613-44102441	testis expressed 30	---	448.247	394.034
GSMG0001541	Poglut2	1.3435	0.00900863	0.0996349	chr1:44106546-44118802	protein O-glucosyltransferase 2	---	296.325	220.572
GSMG0001550	Slc39a10	-1.13588	0.219607	0.644724	chr1:46806717-46925776	solute carrier family 39 (zinc transporter), member 10	ENSMUSG00000025986	808.432	918.132
GSMG0001551	---	1.25784	0.368787	0.788988	chr1:46849533-46850479	---	---	76.7099	61.1379
GSMG0001555	Nabp1	1.23287	0.0780053	0.362094	chr1:51465862-51478419	nucleic acid binding protein 1	---	556.32	451.319
GSMG0001558	Myo1b	-1.34201	0.0889927	0.392323	chr1:51749758-51915978	myosin IB	---	147.001	196.594
GSMG0001561	Gls	1.03085	0.732462	0.905642	chr1:52163449-52233232	glutaminase	---	54048.2	52430.7
GSMG0001564	Nab1	1.03351	0.75026	0.91282	chr1:52455850-52500448	Ngfi-A binding protein 1	---	2302.38	2226.94
GSMG0001568	Mfsd6	-1.37485	0.0328074	0.218721	chr1:52656286-52727462	major facilitator superfamily domain containing 6	---	2751.53	3782.51
GSMG0001570	---	-1.01913	0.877808	0.948986	chr1:52784690-52788833	---	---	1098.82	1119.22
GSMG0001571	Inpp1	1.19301	0.0208145	0.1664	chr1:52789414-52817688	inositol polyphosphate-1-phosphatase	ENSMUSG00000026102	1364.11	1143.08
GSMG0001574	Pms1	-1.11725	0.519775	0.845039	chr1:53189191-53297028	PMS1 homolog 1, mismatch repair system component	ENSMUSG00000026098	139.102	154.965
GSMG0001576	Asnsd1 // Gm50478	1.25437	0.035522	0.228607	chr1:53325507-53352754	asparagine synthetase domain containing 1 // predicted gene, 50478	ENSMUSG00000117809	2667.93	2127.05
GSMG0001581	Hecw2	-1.09783	0.60885	0.905642	chr1:53806874-54195168	HECT, C2 and WW domain containing E3 ubiquitin protein ligase 2	---	125.164	137.485
GSMG0001587	Gtf3c3	-1.03306	0.636005	0.905642	chr1:54395877-54439026	general transcription factor IIIC, polypeptide 3	ENSMUSG00000041303	2497.32	2580.08
GSMG0001590	Pgap1	-1.16143	0.180983	0.583385	chr1:54473000-54557695	post-GPI attachment to proteins 1	ENSMUSG00000073678	1705.82	1981.33
GSMG0001592	Ankrd44	-1.42078	0.423659	0.813642	chr1:54645342-54926388	ankyrin repeat domain 44	---	38.0387	53.9982
GSMG0001596	Sf3b1	-1.20253	0.109249	0.442104	chr1:54985161-55027482	splicing factor 3b, subunit 1	---	1586.76	1908.21
GSMG0001599	Hspd1	1.16076	0.0599511	0.31042	chr1:55077833-55088243	heat shock protein 1 (chaperonin)	ENSMUSG00000025980	22224.4	19146
GSMG0001606	Tyw5	1.30051	0.0473953	0.271178	chr1:57388245-57406686	tRNA-yW synthesizing protein 5	---	505.517	388.789
GSMG0001608	Kctd18	1.1661	0.271521	0.706034	chr1:57955101-58018958	potassium channel tetramerisation domain containing 18	---	217.753	186.352
GSMG0001611	Clk1	-1.02083	0.919884	0.969797	chr1:58410190-58424088	CDC-like kinase 1	---	405.523	413.366
GSMG0001612	Ppil3	1.37148	0.00779827	0.0912042	chr1:58430993-58445492	peptidylprolyl isomerase (cyclophilin)-like 3	---	1539.31	1122.33
GSMG0001613	Orc2	1.01031	0.915346	0.967132	chr1:58462771-58505109	origin recognition complex, subunit 2	---	1015.25	1004.07
GSMG0001615	Fam126b	1.02283	0.800501	0.935761	chr1:58522806-58586333	family with sequence similarity 126, member B	---	2447.32	2392.48
GSMG0001619	Trak2	-1.33051	0.0290316	0.203594	chr1:58900450-58973482	trafficking protein, kinesin binding 2	---	3087.59	4107.75
GSMG0001622	Tmem237	1.17013	0.0332963	0.220582	chr1:59100584-59120408	transmembrane protein 237	---	1770.72	1513.32
GSMG0001629	Sumo1	1.49062	0.000943482	0.0260193	chr1:59586558-59670834	small ubiquitin-like modifier 1	ENSMUSG00000026021	14907	10000.6
GSMG0001631	Ica1l	1.05182	0.640206	0.905642	chr1:59989068-60043185	islet cell autoantigen 1-like	---	690.788	656.911
GSMG0001633	Wdr12	1.17484	0.0390244	0.241493	chr1:60076869-60098500	WD repeat domain 12	---	3389.39	2885.04
GSMG0001649	Ino80d	-1.55724	0.0424109	0.254805	chr1:62958419-63114316	INO80 complex subunit D	---	71.5048	111.289
GSMG0001653	Ndufs1	1.09921	0.181201	0.583814	chr1:63143585-63176822	NADH:ubiquinone oxidoreductase core subunit S1	---	11987.3	10905.2
GSMG0001654	Gpr1	1.45106	0.152243	0.532819	chr1:63182571-63214281	G protein-coupled receptor 1	ENSMUSG00000046856	73.3654	50.5071
GSMG0001659	Klf7	-1.46286	0.00781563	0.0912042	chr1:64029463-64121426	Kruppel-like factor 7 (ubiquitous)	ENSMUSG00000025959	370.129	541.465
GSMG0001664	Mettl21a	1.20117	0.0736817	0.350989	chr1:64606473-64617764	methyltransferase like 21A	---	1391.3	1158.6
GSMG0001665	2810408I11Rik	2.85111	0.00678226	0.0840288	chr1:64679869-64690660	RIKEN cDNA 2810408I11 gene	ENSMUSG00000087213	34.9196	12.2162
GSMG0001668	Plekhm3	-1.18686	0.167367	0.560803	chr1:64785984-64956824	pleckstrin homology domain containing, family M, member 3	ENSMUSG00000051344	1058.16	1256.3
GSMG0001676	Cryga	1.45897	0.168208	0.561751	chr1:65100391-65103374	crystallin, gamma A	ENSMUSG00000044429	60.5833	41.5796
GSMG0001677	D630023F18Rik	1.31188	0.0698409	0.339584	chr1:65105285-65123214	RIKEN cDNA D630023F18 gene	---	391.51	298.715
GSMG0001678	Idh1	1.03726	0.682029	0.905642	chr1:65158616-65186479	isocitrate dehydrogenase 1 (NADP+), soluble	---	1894.41	1826.73
GSMG0001683	Kansl1l	-1.33477	0.0470566	0.269968	chr1:66719243-66817595	KAT8 regulatory NSL complex subunit 1-like	---	145.943	195.085
GSMG0001689	Acadl	-1.50972	0.144096	0.517306	chr1:66830839-66863309	acyl-Coenzyme A dehydrogenase, long-chain	ENSMUSG00000026003	69.5656	105.111
GSMG0001691	Lancl1	1.32702	0.0077544	0.09096	chr1:67000517-67038872	LanC (bacterial lantibiotic synthetase component C)-like 1	---	13044.1	9829.7
GSMG0001734	Mreg	1.11867	0.367096	0.787875	chr1:72159233-72212314	melanoregulin	ENSMUSG00000039395	1222.14	1093.15
GSMG0001735	Pecr	1.12639	0.248238	0.680595	chr1:72259167-72284321	peroxisomal trans-2-enoyl-CoA reductase	ENSMUSG00000026189	373.484	331.625
GSMG0001736	Marchf4	-1.37654	0.107361	0.43808	chr1:72427112-72537159	membrane associated ring-CH-type finger 4	ENSMUSG00000039372	212.476	291.822
GSMG0001738	Igfbp5	-1.36407	0.0290415	0.203594	chr1:72857934-72874886	insulin-like growth factor binding protein 5	ENSMUSG00000026185	42360.4	57782.3
GSMG0001752	Aamp	1.20675	0.0489353	0.276276	chr1:74279840-74284738	angio-associated migratory protein	---	16234.7	13453.7
GSMG0001754	Tmbim1	-1.02776	0.852277	0.948986	chr1:74288248-74304362	transmembrane BAX inhibitor motif containing 1	ENSMUSG00000006301	228.905	235.526
GSMG0001755	Rnf25	1.04686	0.601225	0.903813	chr1:74593749-74601399	ring finger protein 25	---	1773.63	1693.68
GSMG0001758	Usp37	-1.20186	0.228519	0.657911	chr1:74435510-74544287	ubiquitin specific peptidase 37	---	697.17	837.958
GSMG0001760	Zfp142	-1.60324	0.00281229	0.0500336	chr1:74565128-74588038	zinc finger protein 142	---	1178.29	1888.87
GSMG0001761	Prkag3	-1.11918	0.55217	0.867084	chr1:74738922-74748956	protein kinase, AMP-activated, gamma 3 non-catalytic subunit	ENSMUSG00000006542	170.484	191.032
GSMG0001767	Cnppd1	-1.02114	0.804386	0.937732	chr1:75134554-75142711	cyclin Pas1/PHO80 domain containing 1	---	1829.21	1867.71
GSMG0001768	Abcb6	1.29449	0.0161016	0.142837	chr1:75171640-75180393	ATP-binding cassette, sub-family B (MDR/TAP), member 6	ENSMUSG00000026198	454.933	351.507
GSMG0001769	Atg9a	-1.11206	0.230257	0.659902	chr1:75180861-75192010	autophagy related 9A	---	7547.84	8394.04
GSMG0001770	Glb1l	-1.29162	0.34388	0.767762	chr1:75197291-75210779	galactosidase, beta 1-like	---	37.8804	49.3718
GSMG0001771	Tuba4a	1.22641	0.0479552	0.273137	chr1:75214972-75219294	tubulin, alpha 4A	ENSMUSG00000026202	36207.2	29522.9
GSMG0001773	Ptprn	-1.08761	0.248078	0.680363	chr1:75247027-75264216	protein tyrosine phosphatase, receptor type, N	ENSMUSG00000026204	21230	23090
GSMG0001774	Resp18	1.3144	0.017355	0.149211	chr1:75272198-75278415	regulated endocrine-specific protein 18	ENSMUSG00000033061	9823.05	7473.1
GSMG0001775	Dnpep	1.30411	0.00992786	0.106226	chr1:75307896-75317637	aspartyl aminopeptidase	---	6854.21	5255.99
GSMG0001779	Chpf	1.07059	0.510638	0.845039	chr1:75474571-75479471	chondroitin polymerizing factor	---	10364.7	9681.58
GSMG0001780	Obsl1	-1.12068	0.258313	0.691108	chr1:75485825-75506454	obscurin-like 1	---	795.479	892
GSMG0001783	Epha4	-1.86626	0.39064	0.793776	chr1:77367185-77515088	Eph receptor A4	ENSMUSG00000026235	275.747	514.68
GSMG0001789	Farsb	1.05311	0.518649	0.845039	chr1:78417958-78488897	phenylalanyl-tRNA synthetase, beta subunit	---	7137.53	6776.94
GSMG0001794	Scg2	1.05905	0.589543	0.895777	chr1:79434366-79440041	secretogranin II	---	42404.2	40039.4
GSMG0001795	Ap1s3	1.21322	0.150685	0.529655	chr1:79606878-79671972	adaptor-related protein complex AP-1, sigma 3	ENSMUSG00000054702	329.372	271.7
GSMG0001797	Wdfy1	-3.55043	0.004262	0.0632635	chr1:79702264-79761770	WD repeat and FYVE domain containing 1	---	172.665	613.074
GSMG0001798	Serpine2	-1.29305	0.287642	0.719253	chr1:79794197-79858665	serine (or cysteine) peptidase inhibitor, clade E, member 2	ENSMUSG00000026249	337.728	436.831
GSMG0001803	Cul3	-1.00511	0.962129	0.98999	chr1:80264925-80340690	cullin 3	---	8590.13	8633.24
GSMG0001813	Irs1	-1.0339	0.778265	0.925402	chr1:82233105-82291439	insulin receptor substrate 1	ENSMUSG00000055980	7741.58	8003.73
GSMG0001826	Sphkap	-1.73681	0.00202141	0.0409841	chr1:83255442-83408200	SPHK1 interactor, AKAP domain containing	ENSMUSG00000026163	665.754	1156.69
GSMG0001830	Pid1	-1.00413	0.952956	0.98579	chr1:84036293-84341110	phosphotyrosine interaction domain containing 1	ENSMUSG00000045658	15973.6	16040.6
GSMG0001836	Dner	-1.01609	0.839702	0.948986	chr1:84369839-84696221	delta/notch-like EGF repeat containing	ENSMUSG00000036766	27174.4	27611.6
GSMG0001840	Trip12	-1.3791	0.00544358	0.0730612	chr1:84721189-84840517	thyroid hormone receptor interactor 12	---	5759.68	7942.42
GSMG0001844	Slc16a14	-1.19023	0.55884	0.872445	chr1:84905898-84935136	solute carrier family 16 (monocarboxylic acid transporters), member 14	ENSMUSG00000026220	75.0412	89.4634
GSMG0001857	Ncl	-1.46795	0.00183574	0.0387199	chr1:86344719-86359455	nucleolin	ENSMUSG00000026234	3373.18	4951.91
GSMG0001858	Nmur1	1.16351	0.350757	0.775924	chr1:86386242-86389361	neuromedin U receptor 1	---	220.753	189.789
GSMG0001860	Pde6d	1.27759	0.00284543	0.0502995	chr1:86542994-86582785	phosphodiesterase 6D, cGMP-specific, rod, delta	ENSMUSG00000026239	6790.25	5314.79
GSMG0001862	Nppc	1.19443	0.424576	0.814372	chr1:86666291-86670576	natriuretic peptide type C	ENSMUSG00000026241	356.818	298.922
GSMG0001868	Ngef	-1.24937	0.165798	0.558692	chr1:87476838-87573870	neuronal guanine nucleotide exchange factor	---	5146.12	6429.74
GSMG0001872	Dnajb3	1.48102	0.0720916	0.346184	chr1:88204732-88205751	DnaJ heat shock protein family (Hsp40) member B3	ENSMUSG00000081984	233.815	158.004
GSMG0001873	6430706D22Rik // A730008H23Rik // Hjurp	-1.4878	0.000308964	0.0130161	chr1:88258858-88277579	RIKEN cDNA 6430706D22 gene // RIKEN cDNA A730008H23 gene // Holliday junction recognition protein	---	1113.13	1656.44
GSMG0001876	Arl4c	1.06151	0.459862	0.84236	chr1:88673127-88702191	ADP-ribosylation factor-like 4C	ENSMUSG00000049866	2069.57	1949.55
GSMG0001880	---	-1.32553	0.0531321	0.28928	chr1:89950220-89951759	---	---	123.774	164.012
GSMG0001892	Ilkap	1.20146	0.0549433	0.295346	chr1:91373861-91398823	integrin-linked kinase-associated serine/threonine phosphatase 2C	ENSMUSG00000026309	3491.39	2906.06
GSMG0001894	Hes6	-1.04052	0.873941	0.948986	chr1:91411482-91414038	hairy and enhancer of split 6	ENSMUSG00000067071	101.507	105.728
GSMG0001895	Per2	-1.53697	0.0701112	0.340352	chr1:91415982-91459332	period circadian clock 2	ENSMUSG00000055866	148.88	228.956
GSMG0001898	Hdac4	-1.42408	0.00124238	0.0309652	chr1:91928779-92180343	histone deacetylase 4	ENSMUSG00000026313	3904.49	5560.39
GSMG0001901	Ndufa10	1.00755	0.914782	0.966841	chr1:92439018-92473815	NADH:ubiquinone oxidoreductase subunit A10	ENSMUSG00000026260	18454.2	18315.4
GSMG0001905	Cops9	1.69507	0.000114171	0.00729246	chr1:92637147-92641985	COP9 signalosome subunit 9	---	13858.9	8176.05
GSMG0001910	5033417F24Rik	-1.35343	0.0844217	0.379319	chr1:92908379-92910767	RIKEN cDNA 5033417F24 gene	ENSMUSG00000097251	81.7213	110.468
GSMG0001912	Kif1a	-1.45946	0.0370424	0.234014	chr1:93015455-93101874	kinesin family member 1A	---	3731.66	5446.66
GSMG0001914	Mterf4	1.19791	0.10177	0.425263	chr1:93299211-93305880	mitochondrial transcription termination factor 4	---	832.921	695.098
GSMG0001916	Hdlbp	-1.36608	0.0347669	0.22587	chr1:93405940-93478917	high density lipoprotein (HDL) binding protein	---	11543.9	15770.1
GSMG0001919	Stk25	1.14785	0.0250435	0.186023	chr1:93619751-93635727	serine/threonine kinase 25 (yeast)	ENSMUSG00000026277	26607.2	23180.2
GSMG0001920	Thap4	1.24191	0.0043582	0.063864	chr1:93701935-93754864	THAP domain containing 4	---	1613.52	1298.73
GSMG0001921	Dtymk	1.26367	0.0512825	0.283392	chr1:93792573-93801934	deoxythymidylate kinase	---	1497.17	1184.64
GSMG0001937	Macir	1.07316	0.465842	0.845039	chr1:97643902-97662018	macrophage immunometabolism regulator	---	4408.95	4108.9
GSMG0001938	Ppip5k2	-1.19633	0.188277	0.595338	chr1:97706043-97770413	diphosphoinositol pentakisphosphate kinase 2	---	418.777	500.264
GSMG0001940	Pam	1.06971	0.401374	0.793776	chr1:97819308-98095646	peptidylglycine alpha-amidating monooxygenase	---	10842	10134.9
GSMG0001948	Rnf152	-1.02173	0.879897	0.94966	chr1:105276915-105356710	ring finger protein 152	---	6229.01	6364.55
GSMG0001949	Pign	1.15882	0.31517	0.750602	chr1:105382279-105663677	phosphatidylinositol glycan anchor biosynthesis, class N	---	221.775	191.65
GSMG0001955	Bcl2	-1.15312	0.267955	0.702065	chr1:106538176-106714290	B cell leukemia/lymphoma 2	---	5818.3	6708.63
GSMG0001962	Kdsr	1.00773	0.950079	0.984549	chr1:106720410-106759742	3-ketodihydrosphingosine reductase	ENSMUSG00000009905	588.752	584.038
GSMG0001974	Dsel	1.08087	0.71094	0.905642	chr1:111858702-111864919	dermatan sulfate epimerase-like	ENSMUSG00000038702	589.937	545.836
GSMG0001981	---	-1.17551	0.242241	0.673017	chr1:118294778-118297580	---	---	381.085	447.672
GSMG0001982	Tsn	1.16734	0.0439947	0.259781	chr1:118298155-118311739	translin	ENSMUSG00000026374	17230.3	14760.4
GSMG0001986	Inhbb	-1.2993	0.0343045	0.224323	chr1:119415463-119423899	inhibin beta-B	ENSMUSG00000037035	722.798	939.348
GSMG0001987	Ralb	-1.14814	0.268232	0.702389	chr1:119470305-119504782	v-ral simian leukemia viral oncogene B	ENSMUSG00000004451	458.552	526.337
GSMG0001993	---	-1.10891	0.471455	0.845039	chr1:119652469-119654876	---	---	5498.54	6097.11
GSMG0001994	Ptpn4	-1.10293	0.350081	0.775278	chr1:119658044-119837347	protein tyrosine phosphatase, non-receptor type 4	ENSMUSG00000026384	5821.28	6420.08
GSMG0002001	Tmem177	1.01655	0.835672	0.946883	chr1:119907904-119913183	transmembrane protein 177	ENSMUSG00000036975	2000.89	1968.63
GSMG0002004	Dbi	1.46487	0.000797718	0.0236933	chr1:120113280-120121096	diazepam binding inhibitor	---	2585.39	1764.89
GSMG0002008	Insig2	1.31515	0.00722624	0.0871958	chr1:121304353-121332589	insulin induced gene 2	---	4509.67	3428.92
GSMG0002010	Htr5b	1.26804	0.029746	0.205738	chr1:121509775-121528465	5-hydroxytryptamine (serotonin) receptor 5B	ENSMUSG00000050534	3521.98	2777.72
GSMG0002011	Ddx18	1.06294	0.501005	0.845039	chr1:121553835-121567980	DEAD box helicase 18	ENSMUSG00000001674	1338.45	1258.91
GSMG0002013	Dpp10	1.07872	0.416682	0.806476	chr1:123332139-124045559	dipeptidylpeptidase 10	---	8489.55	7869.83
GSMG0002029	Actr3	1.23825	0.0301394	0.207646	chr1:125392905-125435727	ARP3 actin-related protein 3	---	11643.5	9403.19
GSMG0002033	Lypd1	1.62138	0.419987	0.809694	chr1:125867624-125912930	Ly6/Plaur domain containing 1	---	1627.06	1003.51
GSMG0002044	Tmem163	1.1498	0.115367	0.455095	chr1:127486554-127678021	transmembrane protein 163	ENSMUSG00000026347	19990.6	17385.9
GSMG0002046	---	-1.4071	0.143621	0.516226	chr1:127678925-127679548	---	---	60.931	85.8518
GSMG0002047	2900009J06Rik	1.00807	0.981032	0.992481	chr1:127753615-127774057	RIKEN cDNA 2900009J06 gene	ENSMUSG00000102014	33.0846	32.9645
GSMG0002051	Zranb3	1.01415	0.93476	0.977238	chr1:127954179-128103048	zinc finger, RAN-binding domain containing 3	---	188.633	185.44
GSMG0002057	Mcm6	1.16213	0.469952	0.845039	chr1:128331575-128359705	minichromosome maintenance complex component 6	---	107.485	92.8193
GSMG0002058	Dars	1.12523	0.169958	0.564488	chr1:128363708-128417416	aspartyl-tRNA synthetase	---	6126.33	5444.62
GSMG0002064	Cd55	1.16221	0.389721	0.793776	chr1:130439026-130462744	CD55 molecule, decay accelerating factor for complement	ENSMUSG00000026399	246.717	212.059
GSMG0002072	Mapkapk2	1.01149	0.876828	0.948986	chr1:131053698-131097843	MAP kinase-activated protein kinase 2	ENSMUSG00000016528	8737.77	8638.28
GSMG0002075	Dyrk3	1.08546	0.439077	0.827436	chr1:131127469-131138290	dual-specificity tyrosine-(Y)-phosphorylation regulated kinase 3	ENSMUSG00000016526	1032.91	952.474
GSMG0002076	Rassf5	-1.0732	0.511392	0.845039	chr1:131176412-131245180	Ras association (RalGDS/AF-6) domain family member 5	---	313.825	337.001
GSMG0002078	Srgap2	-1.286	0.0514194	0.283592	chr1:131285251-131527361	SLIT-ROBO Rho GTPase activating protein 2	ENSMUSG00000026425	2353.26	3026.44
GSMG0002084	Mfsd4a	-1.29781	0.241037	0.671939	chr1:132022813-132068064	major facilitator superfamily domain containing 4A	---	639.816	830.611
GSMG0002085	Cdk18	-1.53757	0.22138	0.646597	chr1:132113550-132139691	cyclin-dependent kinase 18	ENSMUSG00000026437	953.187	1465.76
GSMG0002088	Tmcc2	-1.14077	0.113835	0.451706	chr1:132356316-132391386	transmembrane and coiled-coil domains 2	---	13286.8	15157.9
GSMG0002093	Cntn2	-1.65776	0.0020457	0.0412723	chr1:132509425-132542943	contactin 2	ENSMUSG00000053024	1881.04	3119.05
GSMG0002094	Nfasc	-1.73832	0.0124503	0.122233	chr1:132564691-132741800	neurofascin	---	371.103	645.394
GSMG0002102	Snrpe	1.47673	0.00630424	0.0806013	chr1:133603872-133610280	small nuclear ribonucleoprotein E	ENSMUSG00000090553	2753.37	1864.22
GSMG0002107	Atp2b4	-2.15791	1.40494e-05	0.00201506	chr1:133702674-133800755	ATPase, Ca++ transporting, plasma membrane 4	---	250.357	541.119
GSMG0002109	Optc	-1.77338	0.281063	0.711165	chr1:133897196-133908000	opticin	---	36.7909	65.4659
GSMG0002111	Btg2	-1.18661	0.175091	0.572877	chr1:134074865-134079155	BTG anti-proliferation factor 2	ENSMUSG00000020423	1867.67	2216.48
GSMG0002113	Adora1	-1.18514	0.181755	0.584498	chr1:134199217-134235460	adenosine A1 receptor	---	28269.4	33502.9
GSMG0002114	Ppfia4	-1.15354	0.218641	0.643084	chr1:134296783-134344716	protein tyrosine phosphatase, receptor type, f polypeptide (PTPRF), interacting protein (liprin), alpha 4	ENSMUSG00000026458	1129.72	1303.22
GSMG0002115	Tmem183a	1.4006	0.0367921	0.23312	chr1:134346096-134362006	transmembrane protein 183A	ENSMUSG00000042305	3549.77	2534.56
GSMG0002127	Gpr37l1	-1.18001	0.168831	0.562902	chr1:135160236-135167684	G protein-coupled receptor 37-like 1	ENSMUSG00000026424	333.099	393.395
GSMG0002129	Rnpep	1.08726	0.283638	0.71393	chr1:135262699-135284088	arginyl aminopeptidase (aminopeptidase B)	---	2618.43	2408.66
GSMG0002130	Timm17a	1.42267	0.000129689	0.00780644	chr1:135301535-135313745	translocase of inner mitochondrial membrane 17a	ENSMUSG00000062580	13545.3	9521.07
GSMG0002131	Shisa4	1.20448	0.0264033	0.192631	chr1:135371060-135375081	shisa family member 4	ENSMUSG00000041889	15615.6	12964.5
GSMG0002133	Ipo9	-1.11905	0.266194	0.701057	chr1:135381615-135430499	importin 9	ENSMUSG00000041879	4675.76	5232.56
GSMG0002151	Camsap2	-1.40692	0.0103515	0.108919	chr1:136268123-136346105	calmodulin regulated spectrin-associated protein family, member 2	---	1329.26	1870.01
GSMG0002165	Nek7	1.22315	0.075445	0.355949	chr1:138482875-138619757	NIMA (never in mitosis gene a)-related expressed kinase 7	---	2359.09	1928.2
GSMG0002169	Lhx9	-1.04855	0.832205	0.945078	chr1:138825186-138847579	LIM homeobox protein 9	---	89.331	93.8831
GSMG0002185	---	-1.05926	0.601676	0.903924	chr1:143598965-143601040	---	---	324.189	343.148
GSMG0002186	Cdc73	-1.10064	0.32043	0.750602	chr1:143603276-143702893	cell division cycle 73, Paf1/RNA polymerase II complex component	ENSMUSG00000026361	461.223	507.09
GSMG0002189	Ro60	-1.20338	0.142061	0.513117	chr1:143750793-143777051	Ro60, Y RNA binding protein	ENSMUSG00000018199	868.529	1044.85
GSMG0002190	Rgs2	1.28709	0.0919983	0.399302	chr1:143999338-144004151	regulator of G-protein signaling 2	ENSMUSG00000026360	5506.4	4277.26
GSMG0002210	Odr4	-1.37554	0.0506583	0.281723	chr1:150361305-150393080	odr4 GPCR localization factor homolog	---	677.512	931.782
GSMG0002216	---	1.28968	0.185562	0.590838	chr1:151342734-151345232	---	---	200.713	155.571
GSMG0002217	Swt1	-1.39223	0.14033	0.510048	chr1:151367699-151428456	SWT1 RNA endoribonuclease homolog (S. cerevisiae)	ENSMUSG00000052748	42.429	58.8537
GSMG0002218	Rnf2	1.14669	0.118019	0.461572	chr1:151469398-151500991	ring finger protein 2	---	1312.37	1144.33
GSMG0002226	Tsen15	1.32465	0.0126331	0.123452	chr1:152370738-152386684	tRNA splicing endonuclease subunit 15	ENSMUSG00000014980	713.589	538.687
GSMG0002227	Rgl1	-1.18075	0.161875	0.552015	chr1:152516762-152766305	ral guanine nucleotide dissociation stimulator,-like 1	---	2920.88	3449.01
GSMG0002231	Smg7	-1.44667	0.0260425	0.190749	chr1:152836995-152902646	Smg-7 homolog, nonsense mediated mRNA decay factor (C. elegans)	---	3242.82	4691.31
GSMG0002233	Lamc2	-1.30112	0.044988	0.263319	chr1:153122756-153186448	laminin, gamma 2	---	293.253	381.885
GSMG0002234	Lamc1	-1.69736	0.0249541	0.185807	chr1:153218922-153332786	laminin, gamma 1	ENSMUSG00000026478	109.333	185.862
GSMG0002238	Dhx9	-1.10241	0.503027	0.845039	chr1:153455758-153487661	DEAH (Asp-Glu-Ala-His) box polypeptide 9	---	1274.36	1404.46
GSMG0002239	Npl	1.14855	0.369279	0.789487	chr1:153503016-153549716	N-acetylneuraminate pyruvate lyase	ENSMUSG00000042684	318.813	277.573
GSMG0002248	Cacna1e	-1.89838	0.101432	0.424481	chr1:154392513-154884501	calcium channel, voltage-dependent, R type, alpha 1E subunit	ENSMUSG00000004110	32.467	61.8593
GSMG0002251	Ier5	1.30827	0.00043335	0.0162398	chr1:155096367-155099636	immediate early response 5	ENSMUSG00000056708	5533.97	4230.11
GSMG0002253	BC034090	-1.15356	0.257786	0.690513	chr1:155212471-155244532	cDNA sequence BC034090	---	925.502	1067.37
GSMG0002255	Xpr1	-1.15704	0.156348	0.541282	chr1:155274842-155417444	xenotropic and polytropic retrovirus receptor 1	ENSMUSG00000026469	2391.48	2766.54
GSMG0002257	Gm5532	1.02358	0.910646	0.965042	chr1:155520173-155527112	predicted gene 5532	ENSMUSG00000073535	180.824	177.164
GSMG0002260	Qsox1	1.10411	0.238408	0.669342	chr1:155776029-155812899	quiescin Q6 sulfhydryl oxidase 1	---	1522.35	1378.86
GSMG0002265	Tor1aip1	-1.13335	0.176042	0.574525	chr1:156004599-156036480	torsin A interacting protein 1	---	1395.64	1581.78
GSMG0002267	Fam163a	-1.11871	0.260486	0.693626	chr1:156075956-156205028	family with sequence similarity 163, member A	ENSMUSG00000015484	7201.16	8055.64
GSMG0002271	Soat1	-1.01931	0.87638	0.948986	chr1:156428106-156474328	sterol O-acyltransferase 1	ENSMUSG00000026600	530.832	541.424
GSMG0002272	Tor3a	1.32352	0.223527	0.650818	chr1:156653617-156674357	torsin family 3, member A	ENSMUSG00000060519	71.6334	54.0071
GSMG0002273	Fam20b	1.02769	0.753894	0.915078	chr1:156678546-156719010	FAM20B, glycosaminoglycan xylosylkinase	---	1265.27	1231.02
GSMG0002276	Ralgps2	-1.34987	0.0429694	0.256402	chr1:156804166-156939626	Ral GEF with PH domain and SH3 binding motif 2	---	805.034	1086.05
GSMG0002283	Rasal2	-1.44992	0.0394514	0.243269	chr1:157135183-157412595	RAS protein activator like 2	---	139.473	202.497
GSMG0002290	Brinp2	-1.36132	0.122166	0.469756	chr1:158245266-158356326	bone morphogenic protein/retinoic acid inducible neural-specific 2	ENSMUSG00000004031	1000.49	1362.29
GSMG0002298	Cacybp	1.38635	0.000715571	0.0221147	chr1:160202367-160212892	calcyclin binding protein	ENSMUSG00000014226	5805.45	4187.35
GSMG0002314	Zbtb37	-1.19231	0.372943	0.792915	chr1:161008792-161034850	zinc finger and BTB domain containing 37	---	98.727	118.12
GSMG0002315	Dars2	1.10743	0.289158	0.721842	chr1:161040601-161070662	aspartyl-tRNA synthetase 2 (mitochondrial)	ENSMUSG00000026709	1710.82	1544.91
GSMG0002316	Klhl20	1.034	0.728638	0.905642	chr1:161088378-161131479	kelch-like 20	ENSMUSG00000026705	1210.81	1170.55
GSMG0002322	Suco	-1.26263	0.105826	0.434433	chr1:161816112-161876682	SUN domain containing ossification factor	ENSMUSG00000040297	700.362	883.693
GSMG0002324	Dnm3	-1.35615	0.0467784	0.269106	chr1:161987304-162478036	dynamin 3	ENSMUSG00000040265	3604.59	4888.65
GSMG0002335	Eef1aknmt	-1.26597	0.10363	0.429576	chr1:162532127-162548552	EEF1A lysine and N-terminal methyltransferase	ENSMUSG00000026694	352.464	446.979
GSMG0002351	Gorab	1.06211	0.569058	0.880415	chr1:163384904-163403669	golgin, RAB6-interacting	---	445.707	419.666
GSMG0002353	Mettl11b	-1.04835	0.847099	0.948986	chr1:163702983-163725232	methyltransferase like 11B	ENSMUSG00000040113	62.207	64.8972
GSMG0002358	Blzf1	-1.00831	0.913408	0.966417	chr1:164289799-164307490	basic leucine zipper nuclear factor 1	---	1275.51	1285.46
GSMG0002359	Atp1b1	1.08458	0.192024	0.600923	chr1:164437097-164458356	ATPase, Na+/K+ transporting, beta 1 polypeptide	ENSMUSG00000026576	115572	106559
GSMG0002366	Tiprl	1.19495	0.0736967	0.351008	chr1:165212286-165236960	TIP41, TOR signalling pathway regulator-like (S. cerevisiae)	ENSMUSG00000040843	2625.35	2197.03
GSMG0002368	Dcaf6	1.03007	0.764171	0.920081	chr1:165327327-165460463	DDB1 and CUL4 associated factor 6	ENSMUSG00000026571	2002.29	1944.05
GSMG0002373	Mpzl1	1.05073	0.740064	0.907113	chr1:165592176-165634541	myelin protein zero-like 1	---	392.242	373.463
GSMG0002393	Pogk	-1.06818	0.542391	0.859157	chr1:166384625-166409828	pogo transposable element with KRAB domain	---	1488.28	1589.68
GSMG0002398	---	1.1686	0.203423	0.618793	chr1:166998393-167000841	---	---	611.672	523.373
GSMG0002399	---	-1.1455	0.323771	0.750602	chr1:167222913-167223921	---	---	657.166	751.8
GSMG0002400	Uck2	-1.01487	0.897122	0.957898	chr1:167226083-167285133	uridine-cytidine kinase 2	ENSMUSG00000026558	822.835	834.323
GSMG0002407	Pbx1	-1.33052	0.000837083	0.0245249	chr1:168119365-168432169	pre B cell leukemia homeobox 1	---	10203.5	13575.4
GSMG0002422	Rgs4	-1.13191	0.683168	0.905642	chr1:169741486-169747643	regulator of G-protein signaling 4	ENSMUSG00000038530	28194.7	31913.9
GSMG0002424	Hsd17b7	1.31835	0.00635522	0.0810857	chr1:169949537-169969205	hydroxysteroid (17-beta) dehydrogenase 7	---	905.432	687.221
GSMG0002427	Uap1	1.16936	0.0430382	0.25657	chr1:170141221-170174964	UDP-N-acetylglucosamine pyrophosphorylase 1	---	4245.47	3629.85
GSMG0002429	Uhmk1	1.08111	0.381451	0.793776	chr1:170193422-170215407	U2AF homology motif (UHM) kinase 1	---	25608.1	23686.6
GSMG0002431	Nos1ap	-2.07656	0.0708839	0.342754	chr1:170315467-170589851	nitric oxide synthase 1 (neuronal) adaptor protein	ENSMUSG00000038473	55.0498	114.255
GSMG0002433	Atf6	-1.23033	0.203187	0.618572	chr1:170704457-170867771	activating transcription factor 6	ENSMUSG00000026663	960.356	1181.45
GSMG0002436	Dusp12	1.47974	0.00349937	0.0566834	chr1:170873498-170885540	dual specificity phosphatase 12	---	949.256	641.521
GSMG0002441	Sdhc	1.47675	0.00148761	0.0344664	chr1:171127166-171150605	succinate dehydrogenase complex, subunit C, integral membrane protein	ENSMUSG00000058076	29338.2	19866.7
GSMG0002444	Pcp4l1	-1.33647	0.0429207	0.256305	chr1:171173263-171197035	Purkinje cell protein 4-like 1	ENSMUSG00000038370	256.203	342.841
GSMG0002445	Tomm40l	1.3723	0.00988314	0.106	chr1:171216011-171222515	translocase of outer mitochondrial membrane 40-like	ENSMUSG00000005674	923.08	672.718
GSMG0002447	Ndufs2	1.19826	0.0228007	0.176072	chr1:171234853-171247122	NADH:ubiquinone oxidoreductase core subunit S2	ENSMUSG00000013593	44370.6	37029.3
GSMG0002449	Ppox	1.28476	0.0133259	0.127637	chr1:171275990-171281186	protoporphyrinogen oxidase	ENSMUSG00000062729	1049.03	816.431
GSMG0002450	Usp21	1.08196	0.40503	0.794677	chr1:171281955-171287962	ubiquitin specific peptidase 21	ENSMUSG00000053483	2446.85	2261.54
GSMG0002451	Ufc1	1.37454	0.00492746	0.0687362	chr1:171288564-171458485	ubiquitin-fold modifier conjugating enzyme 1	---	6049.9	4401.35
GSMG0002454	Klhdc9	1.08511	0.475824	0.845039	chr1:171358449-171360800	kelch domain containing 9	ENSMUSG00000045259	398.118	367.192
GSMG0002464	Vangl2	-1.36915	0.00706397	0.0857954	chr1:172000961-172028444	VANGL planar cell polarity 2	ENSMUSG00000026556	359.201	492.647
GSMG0002465	Nhlh1	-2.87122	0.114241	0.452541	chr1:172052287-172057597	nescient helix loop helix 1	ENSMUSG00000051251	40.1515	115.435
GSMG0002466	Ncstn	1.03302	0.705319	0.905642	chr1:172066013-172082749	nicastrin	---	5761.21	5577.07
GSMG0002468	Pea15a	1.11602	0.0632016	0.320211	chr1:172196728-172206804	phosphoprotein enriched in astrocytes 15A	---	22724.4	20361.8
GSMG0002470	Atp1a2	-2.12987	1.14552e-07	6.23204e-05	chr1:172271709-172298064	ATPase, Na+/K+ transporting, alpha 2 polypeptide	ENSMUSG00000007097	663.204	1411.88
GSMG0002471	Kcnj9	-1.95941	0.000145499	0.00835691	chr1:172320506-172329322	potassium inwardly-rectifying channel, subfamily J, member 9	---	315.741	619.133
GSMG0002478	Dusp23	-1.03961	0.679228	0.905642	chr1:172630769-172632974	dual specificity phosphatase 23	ENSMUSG00000026544	988.953	1028.32
GSMG0002483	Ackr1	-1.15654	0.131796	0.491978	chr1:173331886-173333674	atypical chemokine receptor 1 (Duffy blood group)	ENSMUSG00000037872	2297.63	2657.19
GSMG0002484	Cadm3	-1.04851	0.484727	0.845039	chr1:173334254-173367695	cell adhesion molecule 3	ENSMUSG00000005338	17206.9	18041.5
GSMG0002496	---	-1.1199	0.445377	0.832549	chr1:174501523-174503609	---	---	172.308	192.975
GSMG0002497	Grem2	-1.09681	0.59232	0.897786	chr1:174833785-174921821	gremlin 2, DAN family BMP antagonist	ENSMUSG00000050069	1473.85	1616.9
GSMG0002498	Rgs7	1.071	0.414011	0.80392	chr1:175059076-175492545	regulator of G protein signaling 7	---	7214.55	6735.78
GSMG0002503	Fh1	1.27999	0.00480244	0.0676199	chr1:175601384-175625635	fumarate hydratase 1	ENSMUSG00000026526	17362.6	13564.6
GSMG0002504	Opn3	1.34564	0.0336703	0.221895	chr1:175662424-175692634	opsin 3	ENSMUSG00000026525	413.845	307.609
GSMG0002508	Pld5	1.1259	0.4536	0.836864	chr1:175962306-176275313	phospholipase D family, member 5	---	224.304	199.158
GSMG0002509	---	1.28669	0.113607	0.451481	chr1:175977803-175979116	---	---	264.176	204.928
GSMG0002519	Hmga2-ps1	1.3835	0.2152	0.637072	chr1:176834621-176836135	high mobility group AT-hook 2, pseudogene 1	---	95.5736	68.8364
GSMG0002521	Akt3	-1.21003	0.0293927	0.204588	chr1:177020083-177248767	thymoma viral proto-oncogene 3	---	2049.05	2479.04
GSMG0002532	Adss	1.20244	0.0169763	0.147525	chr1:177762962-177796509	adenylosuccinate synthetase, non muscle	ENSMUSG00000015961	2440.21	2029.23
GSMG0002537	---	1.23046	0.142485	0.513883	chr1:178313328-178319103	---	---	622.872	506.207
GSMG0002538	Hnrnpu	-1.41843	0.00701526	0.085462	chr1:178321109-178337815	heterogeneous nuclear ribonucleoprotein U	ENSMUSG00000039630	4998.66	7090.08
GSMG0002542	Smyd3	1.30337	0.0045865	0.0658511	chr1:178950183-179518041	SET and MYND domain containing 3	---	1951.43	1497.09
GSMG0002549	Tfb2m	1.07716	0.604057	0.905006	chr1:179528054-179546276	transcription factor B2, mitochondrial	ENSMUSG00000026492	364.94	338.673
GSMG0002550	Ahctf1 // Kif28	-1.62081	0.0114807	0.116633	chr1:179695037-179804015	AT hook containing transcription factor 1 // kinesin family member 28	ENSMUSG00000026491,ENSMUSG00000087236	528.315	856.553
GSMG0002552	Coq8a	-2.14144	0.0520112	0.28555	chr1:180165238-180196020	coenzyme Q8A	---	1817.61	3892.31
GSMG0002553	Psen2	1.09491	0.294833	0.728897	chr1:180227006-180256302	presenilin 2	---	1032.68	943.386
GSMG0002555	Stum	-1.19704	0.0254009	0.187695	chr1:180432373-180483504	mechanosensory transduction mediator	---	12315.4	14742.4
GSMG0002562	Ephx1	1.10557	0.476078	0.845039	chr1:180989551-181017569	epoxide hydrolase 1, microsomal	---	425.994	385.759
GSMG0002565	Nvl	-1.23212	0.119696	0.464621	chr1:181087138-181144204	nuclear VCP-like	ENSMUSG00000026516	1040.27	1281.49
GSMG0002566	Wdr26	-1.10477	0.321821	0.750602	chr1:181173228-181211979	WD repeat domain 26	---	14192.9	15679.3
GSMG0002572	Lbr	1.09053	0.577162	0.886649	chr1:181815316-181842401	lamin B receptor	ENSMUSG00000004880	157.465	144.64
GSMG0002575	Enah	-1.0651	0.588922	0.89517	chr1:181896384-182019980	ENAH actin regulator	---	1407.52	1498.85
GSMG0002581	Degs1	1.20537	0.0421587	0.253821	chr1:182275770-182282801	delta(4)-desaturase, sphingolipid 1	ENSMUSG00000038633	4738.94	3931.73
GSMG0002582	Fbxo28	1.09335	0.322142	0.750602	chr1:182313102-182341619	F-box protein 28	ENSMUSG00000047539	11146.9	10194.5
GSMG0002584	Capn2	-1.26915	0.0686406	0.336238	chr1:182467254-182517610	calpain 2	ENSMUSG00000026509	2240.72	2843.49
GSMG0002591	Mtarc2	1.24365	0.0577132	0.302748	chr1:184813066-184846451	mitochondrial amidoxime reducing component 2	ENSMUSG00000073481	2432.26	1955.83
GSMG0002592	C130074G19Rik	-3.76552	0.00289	0.0508028	chr1:184871922-184883036	RIKEN cDNA C130074G19 gene	ENSMUSG00000039349	71.269	268.653
GSMG0002593	Mark1	-1.36721	0.00553018	0.0737529	chr1:184896424-184999954	MAP/microtubule affinity regulating kinase 1	ENSMUSG00000026620	6029.78	8244.18
GSMG0002594	Iars2	-1.17602	0.0581946	0.304468	chr1:185284727-185329402	isoleucine-tRNA synthetase 2, mitochondrial	---	2800.51	3293.26
GSMG0002598	Lyplal1	1.1797	0.119941	0.465169	chr1:186087732-186117310	lysophospholipase-like 1	ENSMUSG00000039246	857.675	727.083
GSMG0002601	Tgfb2	-1.10147	0.782195	0.92702	chr1:186622792-186705990	transforming growth factor, beta 2	---	34.897	38.6925
GSMG0002605	Rrp15	1.28663	0.0224725	0.174483	chr1:186721089-186749359	ribosomal RNA processing 15 homolog	ENSMUSG00000001305	354.525	275.078
GSMG0002617	Kctd3	-1.14837	0.105834	0.434433	chr1:188971095-189007842	potassium channel tetramerisation domain containing 3	---	2912.24	3344.65
GSMG0002619	Kcnk2	-1.0073	0.923058	0.971617	chr1:189207930-189402273	potassium channel, subfamily K, member 2	---	981.063	988.338
GSMG0002624	Smyd2	1.2208	0.00258994	0.0475686	chr1:189880492-189922293	SET and MYND domain containing 2	ENSMUSG00000026603	30051.2	24615.5
GSMG0002628	Rps6kc1	-1.18801	0.109288	0.442104	chr1:190700202-190911770	ribosomal protein S6 kinase polypeptide 1	ENSMUSG00000089872	3962.08	4706.87
GSMG0002630	Vash2	-1.00723	0.944638	0.981918	chr1:190947648-190979298	vasohibin 2	ENSMUSG00000037568	2205.7	2221.83
GSMG0002631	Flvcr1	1.00153	0.991418	0.996806	chr1:191005832-191026190	feline leukemia virus subgroup C cellular receptor 1	---	227.408	226.738
GSMG0002632	Tatdn3	1.30435	0.0427366	0.255982	chr1:191045826-191062932	TatD DNase domain containing 3	---	324.968	249.29
GSMG0002634	Atf3	-1.1438	0.461599	0.843631	chr1:191170296-191218039	activating transcription factor 3	ENSMUSG00000026628	203.82	232.34
GSMG0002635	Nenf	1.61538	0.00176807	0.0378235	chr1:191306787-191318131	neuron derived neurotrophic factor	ENSMUSG00000037499	9440.65	5844.31
GSMG0002636	Ppp2r5a	1.1107	0.199201	0.612401	chr1:191351981-191397043	protein phosphatase 2, regulatory subunit B', alpha	ENSMUSG00000026626	2897.19	2607.52
GSMG0002641	Dtl	1.33608	0.0373994	0.235033	chr1:191537356-191575544	denticleless E3 ubiquitin protein ligase	ENSMUSG00000037474	362.12	271.079
GSMG0002646	Rcor3	1.05992	0.559731	0.87322	chr1:192098546-192138040	REST corepressor 3	---	366.126	345.405
GSMG0002647	Hhat	1.0147	0.941357	0.980376	chr1:192496712-192771219	hedgehog acyltransferase	ENSMUSG00000037375	78.7485	77.3832
GSMG0002649	Sertad4	1.23394	0.0659706	0.329277	chr1:192844428-192855752	SERTA domain containing 4	---	2233.29	1809.32
GSMG0002651	Syt14	1.00421	0.982278	0.992851	chr1:192891236-193035776	synaptotagmin XIV	---	136.086	135.754
GSMG0002652	Utp25	-1.11098	0.44464	0.8318	chr1:193104403-193130270	UTP25 small subunit processome component	---	432.583	480.374
GSMG0002657	G0s2	1.24113	0.34142	0.764433	chr1:193272160-193273188	G0/G1 switch gene 2	ENSMUSG00000009633	161.654	130.527
GSMG0002659	Camk1g	-1.38081	0.0819044	0.37291	chr1:193346347-193370282	calcium/calmodulin-dependent protein kinase I gamma	ENSMUSG00000016179	534.366	738.099
GSMG0002669	Cr1l	1.02167	0.848707	0.948986	chr1:195097382-195131570	complement component (3b/4b) receptor 1-like	---	499.72	489.146
GSMG0002671	Cnksr3	1.17368	0.171863	0.567732	chr10:7119061-7212238	Cnksr family member 3	ENSMUSG00000015202	650.999	554.524
GSMG0002673	Ipcef1	-1.2214	0.437289	0.825796	chr10:6885804-6996577	interaction protein for cytohesin exchange factors 1	---	215.294	263.153
GSMG0002678	Rgs17	-1.24009	0.0192925	0.158906	chr10:5825663-5922401	regulator of G-protein signaling 17	---	4150.78	5146.77
GSMG0002680	Mtrf1l	1.04985	0.666622	0.905642	chr10:5811887-5823943	mitochondrial translational release factor 1-like	ENSMUSG00000019774	442.583	420.887
GSMG0002687	Rmnd1	1.07683	0.401607	0.793776	chr10:4401915-4432388	required for meiotic nuclear division 1 homolog	ENSMUSG00000019763	1712.58	1590.29
GSMG0002689	Zbtb2	1.00189	0.986782	0.994514	chr10:4367074-4388110	zinc finger and BTB domain containing 2	---	538.684	536.839
GSMG0002696	Lrp11	1.0291	0.695169	0.905642	chr10:7589799-7625475	low density lipoprotein receptor-related protein 11	---	4711.02	4577.61
GSMG0002697	A630066F11Rik	-1.36186	0.166778	0.560065	chr10:7663369-7664623	RIKEN cDNA A630066F11 gene	---	70.7698	96.4745
GSMG0002698	Nup43	1.37968	0.0247069	0.184497	chr10:7667502-7678886	nucleoporin 43	ENSMUSG00000040034	649.582	470.591
GSMG0002699	Lats1	-1.12353	0.153883	0.53612	chr10:7681207-7716823	large tumor suppressor	ENSMUSG00000040021	2787.81	3132.22
GSMG0002701	Katna1	1.19249	0.0898975	0.394524	chr10:7726000-7763150	katanin p60 (ATPase-containing) subunit A1	ENSMUSG00000019794	470.101	394.21
GSMG0002704	Ppil4	-1.06084	0.630036	0.905642	chr10:7792893-7823135	peptidylprolyl isomerase (cyclophilin)-like 4	ENSMUSG00000015757	1045.16	1109.23
GSMG0002707	Zc3h12d	4.31762	2.06789e-24	3.26252e-20	chr10:7832468-7870397	zinc finger CCCH type containing 12D	ENSMUSG00000039981	1621.11	375.662
GSMG0002716	Shprh	-1.02412	0.894775	0.956878	chr10:11149426-11215994	SNF2 histone linker PHD RING helicase	---	382.96	391.911
GSMG0002717	Fbxo30	1.24435	0.0605665	0.312325	chr10:11281330-11298045	F-box protein 30	---	1756.23	1411.44
GSMG0002718	---	-1.17121	0.438203	0.82678	chr10:11302099-11304079	---	---	110.805	129.585
GSMG0002719	Epm2a	1.05263	0.457663	0.840743	chr10:11343404-11457722	epilepsy, progressive myoclonic epilepsy, type 2 gene alpha	ENSMUSG00000055493	3970.14	3772.1
GSMG0002721	Sf3b5	1.12355	0.345663	0.770326	chr10:13008450-13009182	splicing factor 3b, subunit 5	ENSMUSG00000078348	4352.33	3874.02
GSMG0002722	Plagl1	-1.45905	0.00376518	0.0591078	chr10:13090683-13131694	pleiomorphic adenoma gene-like 1	---	521.194	759.388
GSMG0002723	Fuca2	1.27038	0.0120767	0.120289	chr10:13501026-13519033	fucosidase, alpha-L- 2, plasma	---	6614.16	5206.49
GSMG0002725	Adat2	2.60486	9.05824e-15	6.45945e-11	chr10:13552893-13563376	adenosine deaminase, tRNA-specific 2	ENSMUSG00000019808	578.691	222.212
GSMG0002728	Hivep2	-1.54799	0.000231316	0.0111184	chr10:13966074-14151376	human immunodeficiency virus type I enhancer binding protein 2	---	2294.67	3551.68
GSMG0002736	Nmbr	-1.05822	0.946558	0.982701	chr10:14759947-14771458	neuromedin B receptor	ENSMUSG00000019865	430.314	455.391
GSMG0002739	Cited2	-1.10258	0.343421	0.767193	chr10:17723225-17725673	Cbp/p300-interacting transactivator, with Glu/Asp-rich carboxy-terminal domain, 2	ENSMUSG00000039910	3225.16	3555.79
GSMG0002741	Reps1	-1.02494	0.769061	0.921927	chr10:18055940-18125155	RalBP1 associated Eps domain containing protein	---	4179.51	4283.55
GSMG0002749	Perp	1.01701	0.896347	0.957525	chr10:18845069-18857078	PERP, TP53 apoptosis effector	ENSMUSG00000019851	1066.93	1048.99
GSMG0002755	Ifngr1	1.10833	0.413684	0.803482	chr10:19591949-19610233	interferon gamma receptor 1	ENSMUSG00000020009	476.609	429.464
GSMG0002758	Il20ra	1.00669	0.976665	0.990667	chr10:19712586-19760053	interleukin 20 receptor, alpha	ENSMUSG00000020007	88.6913	87.8699
GSMG0002759	Map3k5	-1.37079	0.0779454	0.362009	chr10:19934472-20142750	mitogen-activated protein kinase kinase kinase 5	ENSMUSG00000071369	366.337	502.43
GSMG0002761	Map7	-2.46258	1.52153e-07	7.74362e-05	chr10:20148471-20281589	microtubule-associated protein 7	---	121.963	299.365
GSMG0002766	Bclaf1	-2.02913	1.25856e-05	0.00190012	chr10:20312469-20344613	BCL2-associated transcription factor 1	---	2064.61	4189.45
GSMG0002769	Ahi1	-1.12127	0.537806	0.856375	chr10:20952547-21080429	Abelson helper integration site 1	---	247.05	277.194
GSMG0002772	Hbs1l	1.0591	0.352671	0.777677	chr10:21295979-21368898	Hbs1-like (S. cerevisiae)	---	5499.13	5191.94
GSMG0002778	Sgk1	1.17767	0.294741	0.728897	chr10:21882184-21999900	serum/glucocorticoid regulated kinase 1	---	2328.88	1977.31
GSMG0002790	Slc18b1	1.21593	0.0795126	0.366393	chr10:23796986-23827968	solute carrier family 18, subfamily B, member 1	ENSMUSG00000037455	2920.15	2400.88
GSMG0002792	Vnn1	2.23062	0.0185654	0.155347	chr10:23894688-23905343	vanin 1	ENSMUSG00000037440	52.5166	23.6378
GSMG0002803	Stx7	1.30629	0.000592816	0.0196803	chr10:24149289-24190224	syntaxin 7	---	14635.2	11203.2
GSMG0002808	Ccn2	1.23543	0.0463495	0.267338	chr10:24595442-24598685	cellular communication network factor 2	ENSMUSG00000019997	9491.72	7682.52
GSMG0002809	Med23	-1.17212	0.286816	0.718555	chr10:24869986-24913529	mediator complex subunit 23	---	839.416	983.499
GSMG0002811	Epb41l2	-1.56737	0.0190863	0.157946	chr10:25359797-25523519	erythrocyte membrane protein band 4.1 like 2	---	275.283	431.094
GSMG0002816	Samd3	1.299	0.00505702	0.0697552	chr10:26229706-26272172	sterile alpha motif domain containing 3	---	809.762	623.362
GSMG0002823	Ptprk	-1.35655	0.141447	0.512113	chr10:28074820-28597397	protein tyrosine phosphatase, receptor type, K	---	468.993	636.268
GSMG0002844	Soga3	-1.52493	0.00736267	0.0881007	chr10:29143839-29199630	SOGA family member 3	ENSMUSG00000038916	2127.92	3245.03
GSMG0002845	---	-2.69949	2.72294e-05	0.00292364	chr10:29206264-29210904	---	---	258.422	696.582
GSMG0002846	9330159F19Rik	-1.66484	0.00397702	0.0610661	chr10:29211643-29230779	RIKEN cDNA 9330159F19 gene	---	1487.39	2476.26
GSMG0002847	Echdc1	-1.03921	0.718563	0.905642	chr10:29313166-29347469	enoyl Coenzyme A hydratase domain containing 1	---	2570.42	2670.31
GSMG0002851	Hddc2	1.97868	2.81651e-05	0.00298229	chr10:31313405-31328203	HD domain containing 2	ENSMUSG00000000295	1744.03	881.648
GSMG0002861	---	1.06165	0.746535	0.910597	chr10:34018813-34020757	---	---	164.937	155.617
GSMG0002863	Tspyl1	1.09571	0.295848	0.729996	chr10:34282190-34285275	testis-specific protein, Y-encoded-like 1	ENSMUSG00000047514	21989.2	20068.5
GSMG0002865	Tspyl4	-1.06172	0.397778	0.793776	chr10:34297421-34301321	TSPY-like 4	ENSMUSG00000039485	104516	110967
GSMG0002869	Hs3st5	1.13622	0.137931	0.50473	chr10:36506807-36834392	heparan sulfate (glucosamine) 3-O-sulfotransferase 5	---	6254.83	5504.8
GSMG0002875	Hdac2	1.08382	0.315914	0.750602	chr10:36974543-37001891	histone deacetylase 2	ENSMUSG00000019777	6983.08	6442.82
GSMG0002884	Lama4	-1.59881	0.03827	0.238462	chr10:38965513-39110188	laminin, alpha 4	ENSMUSG00000019846	473.85	757.617
GSMG0002887	Tube1	1.07148	0.684226	0.905642	chr10:39134023-39152544	tubulin, epsilon 1	ENSMUSG00000019845	137.835	128.391
GSMG0002889	Fyn	-1.12105	0.144264	0.517638	chr10:39369796-39565372	Fyn proto-oncogene	---	6846.64	7674.91
GSMG0002906	Cdk19	-1.19628	0.0354306	0.228392	chr10:40349308-40483819	cyclin-dependent kinase 19	---	905.304	1083.09
GSMG0002911	Mettl24	1.24788	0.170432	0.565113	chr10:40683281-40811083	methyltransferase like 24	ENSMUSG00000045555	136.64	109.591
GSMG0002912	Wasf1	-1.0505	0.600982	0.903578	chr10:40883534-40942490	WASP family, member 1	ENSMUSG00000019831	15804.7	16603.2
GSMG0002914	Zbtb24	1.08308	0.518287	0.845039	chr10:41450358-41465582	zinc finger and BTB domain containing 24	---	425.842	393.756
GSMG0002915	Mical1	-1.3238	0.122551	0.470795	chr10:41476312-41487030	microtubule associated monooxygenase, calponin and LIM domain containing 1	---	123.974	163.415
GSMG0002917	Cd164	1.05264	0.641254	0.905642	chr10:41519442-41531044	CD164 antigen	ENSMUSG00000019818	11495	10919.8
GSMG0002920	Sesn1	-1.00411	0.949973	0.984517	chr10:41810574-41908436	sestrin 1	---	3500.94	3516.09
GSMG0002927	Snx3	1.41242	0.000237804	0.0112383	chr10:42501699-42535369	sorting nexin 3	ENSMUSG00000019804	22198.8	15716.8
GSMG0002929	Ostm1	1.07698	0.328746	0.750602	chr10:42678916-42702462	osteopetrosis associated transmembrane protein 1	ENSMUSG00000038280	1638.31	1520.87
GSMG0002930	Sec63	-1.17538	0.299419	0.733586	chr10:42761496-42832513	SEC63-like (S. cerevisiae)	ENSMUSG00000019802	1059.01	1244.49
GSMG0002933	9030612E09Rik	1.22568	0.361189	0.782275	chr10:43174698-43176565	RIKEN cDNA 9030612E09 gene	ENSMUSG00000045008	121.871	99.0303
GSMG0002935	Pdss2	1.18958	0.0732378	0.349666	chr10:43221485-43464882	prenyl (solanesyl) diphosphate synthase, subunit 2	---	674.064	566.336
GSMG0002940	Bend3	-1.02855	0.806754	0.939001	chr10:43479140-43515417	BEN domain containing 3	ENSMUSG00000038214	692.715	713.059
GSMG0002942	Cd24a	1.36726	0.0486199	0.275431	chr10:43579168-43584267	CD24a antigen	ENSMUSG00000047139	1357.34	992.85
GSMG0002948	Rtn4ip1	1.18569	0.106491	0.43577	chr10:43901805-43947863	reticulon 4 interacting protein 1	ENSMUSG00000019864	850.152	717.001
GSMG0002951	Atg5	1.21559	0.0401916	0.246158	chr10:44268339-44364291	autophagy related 5	ENSMUSG00000038160	1830.84	1506.17
GSMG0002960	Hace1	1.0642	0.644441	0.905642	chr10:45577829-45712345	HECT domain and ankyrin repeat containing, E3 ubiquitin protein ligase 1	ENSMUSG00000038822	963.622	905.503
GSMG0002981	Vgll2	-1.39006	0.0846019	0.379842	chr10:52022502-52028471	vestigial like family member 2	ENSMUSG00000049641	151.093	209.382
GSMG0002982	Dcbld1	-1.16595	0.598386	0.90234	chr10:52233618-52321378	discoidin, CUB and LCCL domain containing 1	---	51.871	60.4405
GSMG0002986	Nus1	1.24444	0.0326112	0.217965	chr10:52417546-52440192	NUS1 dehydrodolichyl diphosphate synthase subunit	ENSMUSG00000023068	7138.17	5735.73
GSMG0002988	Slc35f1	1.01403	0.873699	0.948986	chr10:52690501-53111622	solute carrier family 35, member F1	ENSMUSG00000038602	4132.6	4075.05
GSMG0002999	Asf1a	1.3426	0.00459334	0.0658511	chr10:53596948-53609213	anti-silencing function 1A histone chaperone	ENSMUSG00000019857	2003.54	1491.71
GSMG0003001	---	-1.17465	0.268227	0.702389	chr10:53614368-53615274	---	---	187.598	219.999
GSMG0003005	Msl3l2	1.00434	0.960521	0.989251	chr10:56106906-56117577	MSL3 like 2	ENSMUSG00000047669	1259.59	1254.61
GSMG0003006	Gja1	-1.58939	0.00647812	0.0822247	chr10:56377273-56402513	gap junction protein, alpha 1	ENSMUSG00000050953	300.558	477.394
GSMG0003011	Hsf2	-1.03727	0.719287	0.905642	chr10:57486383-57513143	heat shock factor 2	---	1137.39	1179.18
GSMG0003013	Pkib	1.27629	0.0273957	0.196919	chr10:57631975-57741112	protein kinase inhibitor beta, cAMP dependent, testis specific	---	6775.67	5309.05
GSMG0003014	Fabp7	1.15776	0.169626	0.564203	chr10:57784919-57788450	fatty acid binding protein 7, brain	ENSMUSG00000019874	627.139	541.945
GSMG0003015	Smpdl3a	1.08936	0.28545	0.716554	chr10:57794544-57811830	sphingomyelin phosphodiesterase, acid-like 3A	ENSMUSG00000019872	943.329	866.203
GSMG0003017	Gcc2	-2.47612	8.99442e-05	0.00636345	chr10:58255503-58305598	GRIP and coiled-coil domain containing 2	ENSMUSG00000038039	330.272	817.57
GSMG0003019	Lims1	-1.07921	0.504352	0.845039	chr10:58323464-58424691	LIM and senescent cell antigen-like domains 1	---	285.804	308.08
GSMG0003022	Ranbp2	-1.38544	0.0216278	0.170387	chr10:58446852-58494155	RAN binding protein 2	ENSMUSG00000003226	1779.29	2464.74
GSMG0003024	Ccdc138	1.25157	0.404056	0.793776	chr10:58497937-58576244	coiled-coil domain containing 138	ENSMUSG00000038010	61.3731	48.938
GSMG0003030	Sh3rf3	-2.19274	0.000391803	0.0151321	chr10:58813359-59138915	SH3 domain containing ring finger 3	ENSMUSG00000037990	375.825	824.305
GSMG0003033	Sowahc	-1.05636	0.634414	0.905642	chr10:59221921-59226434	sosondowah ankyrin repeat domain family member C	ENSMUSG00000098188	772.526	816.569
GSMG0003034	P4ha1	1.23739	0.0569983	0.30059	chr10:59323296-59373303	procollagen-proline, 2-oxoglutarate 4-dioxygenase (proline 4-hydroxylase), alpha 1 polypeptide	---	904.225	730.22
GSMG0003038	Micu1	1.04531	0.558456	0.872223	chr10:59702561-59864135	mitochondrial calcium uptake 1	---	8409.38	8044.93
GSMG0003040	Dnajb12	-1.28423	0.00228876	0.0441065	chr10:59879564-59899296	DnaJ heat shock protein family (Hsp40) member B12	ENSMUSG00000020109	1722.98	2213.57
GSMG0003041	Ascc1	1.20492	0.0765031	0.358317	chr10:60002804-60099990	activating signal cointegrator 1 complex subunit 1	---	2976.25	2470.34
GSMG0003043	Spock2	-1.26491	0.0140829	0.131516	chr10:60106255-60135197	sparc/osteonectin, cwcv and kazal-like domains proteoglycan 2	ENSMUSG00000058297	13941.2	17634.6
GSMG0003044	Psap	1.03772	0.619903	0.905642	chr10:60277628-60302604	prosaposin	---	149309	143882
GSMG0003049	Pcbd1	1.60275	1.45403e-05	0.00204884	chr10:61089331-61094329	pterin 4 alpha carbinolamine dehydratase/dimerization cofactor of hepatocyte nuclear factor 1 alpha (TCF1) 1	ENSMUSG00000020098	2824.99	1762.7
GSMG0003056	Lrrc20	-1.36508	0.000415894	0.015773	chr10:61475800-61582790	leucine rich repeat containing 20	ENSMUSG00000037151	5184.49	7077.58
GSMG0003061	Ppa1	1.25712	0.00477377	0.0673364	chr10:61648570-61674169	pyrophosphatase (inorganic) 1	ENSMUSG00000020089	13617.9	10832.3
GSMG0003062	Sar1a	1.20808	0.0310557	0.211374	chr10:61680285-61693297	secretion associated Ras related GTPase 1A	---	22607.2	18713.3
GSMG0003063	Tysnd1	1.06956	0.459038	0.841793	chr10:61695513-61702773	trypsin domain containing 1	ENSMUSG00000020087	1544.01	1443.96
GSMG0003064	Aifm2	1.03985	0.792611	0.930988	chr10:61715263-61742008	apoptosis-inducing factor, mitochondrion-associated 2	---	470.724	452.9
GSMG0003065	---	1.1098	0.410851	0.800616	chr10:61783296-61784820	---	---	1666.12	1501.71
GSMG0003070	4930507D05Rik	1.12386	0.47002	0.845039	chr10:62449159-62451353	RIKEN cDNA 4930507D05 gene	ENSMUSG00000097129	190.079	169.154
GSMG0003074	Slc25a16	1.21514	0.072943	0.348734	chr10:62920633-62946494	solute carrier family 25 (mitochondrial carrier, Graves disease autoantigen), member 16	ENSMUSG00000071253	2506.02	2062.32
GSMG0003076	Rufy2	-1.33356	0.0283511	0.201077	chr10:62980222-63018717	RUN and FYVE domain-containing 2	---	1434.15	1912.75
GSMG0003080	Herc4	1.14814	0.0864475	0.384788	chr10:63243797-63317881	hect domain and RLD 4	---	3810.63	3319.36
GSMG0003085	Dnajc12	1.54028	0.000383835	0.014879	chr10:63382443-63408840	DnaJ heat shock protein family (Hsp40) member C12	---	6569.02	4264.76
GSMG0003107	Jmjd1c	-1.72849	0.0600862	0.310864	chr10:67096125-67256326	jumonji domain containing 1C	---	1610.81	2784.16
GSMG0003113	Rtkn2	-1.01041	0.941969	0.98063	chr10:67979569-68059740	rhotekin 2	---	592.942	599.166
GSMG0003115	Tmem26	-1.07532	0.633566	0.905642	chr10:68723745-68782654	transmembrane protein 26	ENSMUSG00000060044	434.826	468
GSMG0003116	Rhobtb1	-1.44063	0.0602797	0.311406	chr10:69208552-69291782	Rho-related BTB domain containing 1	---	123.484	178.399
GSMG0003130	Ank3	-2.64833	3.79896e-08	2.49734e-05	chr10:69533708-70027438	ankyrin 3, epithelial	---	946.786	2508.19
GSMG0003137	Fam13c	-1.13217	0.343027	0.766671	chr10:70440667-70558933	family with sequence similarity 13, member C	---	1692.12	1915.53
GSMG0003144	Zwint	1.2141	0.00414802	0.0624161	chr10:72654846-72674963	ZW10 interactor	---	98878.3	81441.2
GSMG0003147	Pcdh15	-1.86423	0.0137609	0.129788	chr10:73821867-74649730	protocadherin 15	---	140.349	261.163
GSMG0003154	Gnaz	-1.34032	0.0174645	0.149688	chr10:74967177-75016904	guanine nucleotide binding protein, alpha z subunit	---	4721.45	6328.35
GSMG0003155	Rab36	-1.18451	0.301244	0.735547	chr10:75037058-75054747	RAB36, member RAS oncogene family	---	447.294	530.542
GSMG0003156	Bcr	-1.30902	0.0209629	0.16718	chr10:75060896-75184923	BCR activator of RhoGEF and GTPase	ENSMUSG00000009681	1165.41	1525.51
GSMG0003158	Specc1l	-2.17097	0.000348154	0.0139098	chr10:75212071-75312399	sperm antigen with calponin homology and coiled-coil domains 1-like	---	454.356	986.484
GSMG0003163	Snrpd3	1.17251	0.136108	0.501079	chr10:75517549-75535465	small nuclear ribonucleoprotein D3	ENSMUSG00000020180	7125.3	6076.8
GSMG0003169	---	1.05206	0.849179	0.948986	chr10:75921210-75922541	---	---	95.5942	91.1969
GSMG0003170	Chchd10	1.32269	0.0192271	0.158695	chr10:75933130-75937750	coiled-coil-helix-coiled-coil-helix domain containing 10	ENSMUSG00000049422	40894.7	30918
GSMG0003177	S100b	-1.08409	0.752971	0.914477	chr10:76253836-76261318	S100 protein, beta polypeptide, neural	ENSMUSG00000033208	201.709	218.682
GSMG0003182	Mcm3ap	-1.20834	0.105282	0.433178	chr10:76468902-76515858	minichromosome maintenance complex component 3 associated protein	ENSMUSG00000001150	1575.4	1903.72
GSMG0003183	Lss	-1.20293	0.183254	0.587332	chr10:76531605-76557138	lanosterol synthase	---	732.906	881.327
GSMG0003189	Slc19a1	-1.06333	0.490303	0.845039	chr10:77032684-77050432	solute carrier family 19 (folate transporter), member 1	---	611.609	650.541
GSMG0003191	Pofut2	1.05123	0.507978	0.845039	chr10:77259233-77269586	protein O-fucosyltransferase 2	ENSMUSG00000020260	2866.38	2727.04
GSMG0003192	Gm17769	-1.62129	0.0149007	0.136047	chr10:77418375-77420939	predicted gene, 17769	---	93.6905	151.736
GSMG0003195	Pttg1ip	-1.02912	0.774638	0.924503	chr10:77581655-77598732	pituitary tumor-transforming 1 interacting protein	---	789.247	812.522
GSMG0003196	Sumo3	1.30734	0.00665205	0.0833386	chr10:77606097-77618331	small ubiquitin-like modifier 3	---	51349.5	39277.7
GSMG0003197	Ube2g2	1.15813	0.129356	0.486379	chr10:77622299-77645995	ubiquitin-conjugating enzyme E2G 2	ENSMUSG00000009293	9231.15	7970.85
GSMG0003202	Cfap410	1.13109	0.185362	0.590562	chr10:77978640-77986905	cilia and flagella associated protein 410	ENSMUSG00000020284	1653.14	1461.97
GSMG0003209	Cstb	1.52942	5.97597e-05	0.00472596	chr10:78425670-78427621	cystatin B	ENSMUSG00000005054	5204.34	3402.79
GSMG0003212	Ilvbl	1.3258	0.00615039	0.0793024	chr10:78574500-78584508	ilvB (bacterial acetolactate synthase)-like	---	1736.12	1309.58
GSMG0003217	Slc1a6	1.28557	0.106446	0.43577	chr10:78780495-78814825	solute carrier family 1 (high affinity aspartate/glutamate transporter), member 6	ENSMUSG00000005357	437.369	340.033
GSMG0003225	Tpgs1	1.12646	0.40177	0.793776	chr10:79669162-79676127	tubulin polyglutamylase complex subunit 1	ENSMUSG00000020308	5644.19	5010.88
GSMG0003227	Gzmm	1.98071	0.0148671	0.135789	chr10:79689020-79695260	granzyme M (lymphocyte met-ase 1)	---	51.9775	26.3272
GSMG0003228	Bsg	1.35086	0.00504487	0.0696352	chr10:79704358-79711979	basigin	---	71089.4	52625.3
GSMG0003229	Hcn2	-1.02738	0.732489	0.905642	chr10:79716634-79736108	hyperpolarization-activated, cyclic nucleotide-gated K+ 2	ENSMUSG00000020331	9140.21	9390.71
GSMG0003231	Fgf22	-1.05238	0.689182	0.905642	chr10:79755076-79758596	fibroblast growth factor 22	---	278.716	293.671
GSMG0003233	Palm	-1.06023	0.624948	0.905642	chr10:79793569-79820896	paralemmin	---	14534.2	15410
GSMG0003236	Prtn3	1.21484	0.160465	0.549662	chr10:79879667-79883170	proteinase 3	ENSMUSG00000057729	193.945	159.915
GSMG0003239	Kiss1r	1.19259	0.387448	0.793776	chr10:79916970-79922273	KISS1 receptor	ENSMUSG00000035773	121.549	102.137
GSMG0003241	Wdr18	1.17374	0.103564	0.429433	chr10:79960151-79970180	WD repeat domain 18	ENSMUSG00000035754	6728.87	5733.23
GSMG0003244	Abca7	-1.09033	0.535229	0.854687	chr10:79996494-80015572	ATP-binding cassette, sub-family A (ABC1), member 7	---	325.372	355.13
GSMG0003247	Stk11	-1.01023	0.911577	0.965653	chr10:80115795-80130683	serine/threonine kinase 11	---	5687.54	5746.23
GSMG0003250	Atp5d	1.25963	0.0252872	0.187128	chr10:80142275-80145828	ATP synthase, H+ transporting, mitochondrial F1 complex, delta subunit	---	54087.2	42938.9
GSMG0003251	Midn	1.14274	0.256429	0.689339	chr10:80148271-80158368	midnolin	---	3800.77	3325.86
GSMG0003252	Cirbp	1.09359	0.46674	0.845039	chr10:80165990-80172786	cold inducible RNA binding protein	---	9196.33	8409.64
GSMG0003253	Fam174c	1.27809	0.208219	0.626649	chr10:80172942-80175119	family with sequence similarity 174, member C	ENSMUSG00000035595	124.942	97.8096
GSMG0003254	Efna2	1.07311	0.558564	0.872245	chr10:80179482-80190008	ephrin A2	ENSMUSG00000003070	431.786	401.842
GSMG0003255	Pwwp3a	-1.00418	0.963953	0.99042	chr10:80226598-80245144	PWWP domain containing 3A, DNA repair factor	ENSMUSG00000020156	1068.55	1073.63
GSMG0003256	Ndufs7	1.28251	0.0371896	0.234312	chr10:80249449-80256794	NADH:ubiquinone oxidoreductase core subunit S7	---	19704	15363.9
GSMG0003257	Dazap1	-1.06464	0.501242	0.845039	chr10:80265014-80288408	DAZ associated protein 1	---	2788.45	2969.39
GSMG0003259	Apc2	-1.81891	0.00267324	0.0485615	chr10:80295956-80318257	APC regulator of WNT signaling pathway 2	ENSMUSG00000020135	522.273	950.754
GSMG0003262	Reep6	-1.04015	0.86968	0.948986	chr10:80330145-80336441	receptor accessory protein 6	---	107.972	112.387
GSMG0003263	Plk5	-1.13448	0.774135	0.924299	chr10:80356458-80365489	polo like kinase 5	---	168.336	191.053
GSMG0003265	---	1.16782	0.514293	0.845039	chr10:80400645-80401675	---	---	117.245	100.661
GSMG0003271	Scamp4 // Adat3	1.15891	0.079653	0.366915	chr10:80602879-80615783	secretory carrier membrane protein 4 // adenosine deaminase, tRNA-specific 3	ENSMUSG00000113640,ENSMUSG00000113949	2199.36	1897.79
GSMG0003272	Csnk1g2	-1.18204	0.125249	0.476386	chr10:80622778-80640771	casein kinase 1, gamma 2	---	4586.32	5421.59
GSMG0003274	Izumo4	1.13166	0.345356	0.769977	chr10:80702693-80705382	IZUMO family member 4	---	595.16	526.121
GSMG0003275	Dot1l	-2.38287	0.000188914	0.0098204	chr10:80755203-80795460	DOT1-like, histone H3 methyltransferase (S. cerevisiae)	ENSMUSG00000061589	392.374	934.929
GSMG0003276	Sf3a2	1.01812	0.864223	0.948986	chr10:80798735-80804922	splicing factor 3a, subunit 2	ENSMUSG00000020211	4563.52	4482.57
GSMG0003280	Sppl2b	-1.03526	0.676229	0.905642	chr10:80855257-80868707	signal peptide peptidase like 2B	ENSMUSG00000035206	739.814	766.064
GSMG0003283	Gadd45b	-1.12645	0.531036	0.851439	chr10:80930072-80932204	growth arrest and DNA-damage-inducible 45 beta	ENSMUSG00000015312	138.786	156.488
GSMG0003284	---	1.09053	0.744528	0.909729	chr10:81024810-81026273	---	---	36.8982	33.8683
GSMG0003286	Thop1	1.02298	0.801371	0.936363	chr10:81070083-81082558	thimet oligopeptidase 1	ENSMUSG00000004929	3414.08	3338.06
GSMG0003287	Map2k2	1.16964	0.0867791	0.385557	chr10:81105915-81124696	mitogen-activated protein kinase kinase 2	---	15371.2	13142
GSMG0003289	Zbtb7a	-1.54761	0.000618384	0.0203355	chr10:81136271-81152995	zinc finger and BTB domain containing 7a	---	1400.4	2168.34
GSMG0003291	Eef2	1.02639	0.776156	0.924813	chr10:81176631-81182507	eukaryotic translation elongation factor 2	ENSMUSG00000034994	131182	127809
GSMG0003292	Dapk3	1.09529	0.285741	0.716885	chr10:81183007-81193197	death-associated protein kinase 3	---	3473.46	3171.77
GSMG0003294	Zfr2	-1.19842	0.0854971	0.382349	chr10:81233163-81252123	zinc finger RNA binding protein 2	ENSMUSG00000034949	2701.94	3239.12
GSMG0003295	Matk	1.32025	0.146163	0.521082	chr10:81252935-81263365	megakaryocyte-associated tyrosine kinase	---	4823.47	3653.55
GSMG0003296	Apba3	1.03784	0.701097	0.905642	chr10:81268170-81273246	amyloid beta (A4) precursor protein-binding, family A, member 3	---	903.69	871.391
GSMG0003297	Pip5k1c	-1.3541	0.00111826	0.028933	chr10:81292963-81319973	phosphatidylinositol-4-phosphate 5-kinase, type 1 gamma	---	13625.4	18450.2
GSMG0003298	Cactin	-1.22977	0.068931	0.33706	chr10:81321103-81326251	cactin, spliceosome C complex subunit	ENSMUSG00000034889	699.479	860.507
GSMG0003300	Mfsd12	-1.29712	0.0177328	0.151146	chr10:81357490-81366224	major facilitator superfamily domain containing 12	ENSMUSG00000034854	1734.2	2249.99
GSMG0003302	Dohh // Gm48552 // Gm48551	1.2667	0.101157	0.424006	chr10:81384427-81391555	deoxyhypusine hydroxylase/monooxygenase // predicted gene, 48552 // predicted gene, 48551	ENSMUSG00000078440	6393.45	5047.63
GSMG0003303	Smim24	1.42682	0.00423864	0.0631588	chr10:81393050-81395498	small integral membrane protein 24	ENSMUSG00000078439	375.246	263.007
GSMG0003305	Tle5	1.13058	0.174028	0.571211	chr10:81559444-81566371	TLE family member 5, transcriptional modulator	ENSMUSG00000054452	71688.7	63408.3
GSMG0003306	Tle2	-1.37059	0.0698153	0.339583	chr10:81574561-81590845	transducin-like enhancer of split 2	---	197.242	270.692
GSMG0003307	BC025920	-1.25916	0.093693	0.404325	chr10:81606307-81609835	zinc finger protein pseudogene	ENSMUSG00000074862	317.769	400.222
GSMG0003308	Ankrd24	1.0402	0.696093	0.905642	chr10:81628540-81647612	ankyrin repeat domain 24	ENSMUSG00000054708	541.268	520.678
GSMG0003309	Gm10778	1.05698	0.680471	0.905642	chr10:81649069-81667360	predicted gene 10778	ENSMUSG00000096856	594.145	561.95
GSMG0003312	Zfp873	1.08469	0.527221	0.848599	chr10:82048121-82061586	zinc finger protein 873	---	249.919	230.196
GSMG0003316	AU041133	-1.11033	0.445908	0.833168	chr10:82128013-82153065	expressed sequence AU041133	ENSMUSG00000078435	267.113	296.623
GSMG0003324	Hcfc2	1.17932	0.103169	0.428352	chr10:82699007-82742428	host cell factor C2	ENSMUSG00000020246	586.943	497.806
GSMG0003326	Txnrd1	1.10356	0.204616	0.620931	chr10:82833951-82897724	thioredoxin reductase 1	---	8399.14	7610.27
GSMG0003329	Chst11	-1.21173	0.103147	0.428352	chr10:82985497-83195889	carbohydrate sulfotransferase 11	ENSMUSG00000034612	4884.47	5918.03
GSMG0003332	D10Wsu102e	1.13236	0.217526	0.641179	chr10:83360221-83368835	DNA segment, Chr 10, Wayne State University 102, expressed	ENSMUSG00000020255	1125.89	994.287
GSMG0003334	Washc4	-1.22102	0.0774408	0.360761	chr10:83543752-83596478	WASH complex subunit 4	ENSMUSG00000034560	761.538	930.213
GSMG0003335	1500009L16Rik	1.32526	0.141871	0.512784	chr10:83722865-83762761	RIKEN cDNA 1500009L16 gene	---	726.726	548.485
GSMG0003340	Tcp11l2	-1.02409	0.774101	0.924299	chr10:84576624-84614355	t-complex 11 (mouse) like 2	ENSMUSG00000020034	1887.53	1933.19
GSMG0003341	Polr3b	1.13736	0.267781	0.702065	chr10:84622292-84727177	polymerase (RNA) III (DNA directed) polypeptide B	ENSMUSG00000034453	402.17	353.521
GSMG0003343	Ric8b	-1.24022	0.112952	0.450127	chr10:84917613-85018337	RIC8 guanine nucleotide exchange factor B	---	1579.81	1959.35
GSMG0003345	Tmem263	1.17545	0.210754	0.631242	chr10:85102627-85120618	transmembrane protein 263	ENSMUSG00000060935	1218.04	1036.35
GSMG0003346	Btbd11	-1.0425	0.919662	0.969668	chr10:85386814-85660291	BTB (POZ) domain containing 11	---	75.4147	78.7415
GSMG0003347	Pwp1	1.06945	0.479347	0.845039	chr10:85871831-85889103	PWP1 homolog, endonuclein	ENSMUSG00000001785	971.014	907.356
GSMG0003349	Fbxo7	1.202	0.0485761	0.275282	chr10:86021905-86051877	F-box protein 7	---	5841.51	4859.6
GSMG0003352	Timp3	-1.09305	0.578175	0.887558	chr10:86300412-86349505	tissue inhibitor of metalloproteinase 3	ENSMUSG00000020044	1409.81	1540.51
GSMG0003354	1810014B01Rik	-1.00748	0.976765	0.990676	chr10:86685523-86694806	RIKEN cDNA 1810014B01 gene	ENSMUSG00000097412	62.1178	62.5326
GSMG0003364	Igf1	1.59598	0.000482562	0.0173031	chr10:87858264-87937047	insulin-like growth factor 1	---	17513.5	10973
GSMG0003369	Nup37	1.74011	6.77276e-05	0.00517452	chr10:88146991-88178394	nucleoporin 37	---	441.726	253.481
GSMG0003370	Washc3	1.3598	0.00305684	0.0525644	chr10:88201095-88246158	WASH complex subunit 3	---	1753.56	1289.3
GSMG0003371	Gnptab	-1.29726	0.0620238	0.316529	chr10:88379132-88447329	N-acetylglucosamine-1-phosphate transferase, alpha and beta subunits	ENSMUSG00000035311	947.523	1228.86
GSMG0003375	Arl1	1.21827	0.0595806	0.309364	chr10:88731364-88744092	ADP-ribosylation factor-like 1	ENSMUSG00000060904	21579.3	17713.3
GSMG0003378	1500026H17Rik	1.21752	0.0254396	0.187771	chr10:89686363-89700866	RIKEN cDNA 1500026H17 gene	ENSMUSG00000097383	1472.61	1209.34
GSMG0003379	Uhrf1bp1l	-1.28186	0.0329042	0.218996	chr10:89744983-89819890	UHRF1 (ICBP90) binding protein 1-like	ENSMUSG00000019951	1837.06	2354.63
GSMG0003389	Anks1b	1.03495	0.809292	0.940893	chr10:89873018-90973299	ankyrin repeat and sterile alpha motif domain containing 1B	---	2721.99	2630.01
GSMG0003399	Ikbip	1.25769	0.0421679	0.253828	chr10:91083039-91102612	IKBKB interacting protein	---	650.765	517.294
GSMG0003405	Cdk17	1.15449	0.0723982	0.347234	chr10:93160874-93267071	cyclin-dependent kinase 17	---	28989	25110.4
GSMG0003410	Lta4h	1.19902	0.00861838	0.0974013	chr10:93453388-93484896	leukotriene A4 hydrolase	ENSMUSG00000015889	4784.21	3989.51
GSMG0003415	Ntn4	-1.29898	0.0428297	0.256129	chr10:93641049-93745972	netrin 4	ENSMUSG00000020019	1703.14	2212.54
GSMG0003418	---	1.32805	0.0186672	0.155788	chr10:93778623-93778790	---	---	530.847	399.403
GSMG0003422	Fgd6	-1.08179	0.741966	0.908432	chr10:94036000-94145338	FYVE, RhoGEF and PH domain containing 6	ENSMUSG00000020021	236.757	255.589
GSMG0003424	Nr2c1	-1.0866	0.441315	0.829328	chr10:94147918-94197214	nuclear receptor subfamily 2, group C, member 1	---	465.544	505.97
GSMG0003425	Ndufa12	-1.0463	0.676008	0.905642	chr10:94199004-94221442	NADH:ubiquinone oxidoreductase subunit A12	---	8278.6	8661.65
GSMG0003430	Cep83	-2.71366	0.00157555	0.0352789	chr10:94688653-94790336	centrosomal protein 83	ENSMUSG00000020024	55.7645	150.549
GSMG0003436	Ube2n	1.29586	0.0274583	0.197182	chr10:95515144-95545658	ubiquitin-conjugating enzyme E2N	ENSMUSG00000074781	36279.5	27996.4
GSMG0003442	Eea1	-1.96926	0.110206	0.44405	chr10:95940648-96045518	early endosome antigen 1	ENSMUSG00000036499	129.981	255.743
GSMG0003446	Btg1	1.07869	0.415423	0.805226	chr10:96617001-96622813	BTG anti-proliferation factor 1	ENSMUSG00000036478	6924.1	6419.25
GSMG0003452	Dcn	-1.70195	0.0230773	0.177087	chr10:97479500-97518155	decorin	---	35.0768	59.2499
GSMG0003459	Atp2b1	-1.56756	0.00065328	0.0209275	chr10:98914642-99026143	ATPase, Ca++ transporting, plasma membrane 1	ENSMUSG00000019943	7092.97	11118.7
GSMG0003465	Poc1b	-1.53942	0.142803	0.51431	chr10:99107082-99198067	POC1 centriolar protein B	ENSMUSG00000019952	51.4694	78.9917
GSMG0003469	Dusp6	-1.05876	0.819503	0.944886	chr10:99263228-99267488	dual specificity phosphatase 6	ENSMUSG00000019960	466.236	493.552
GSMG0003474	Kitl	-1.02699	0.822983	0.944886	chr10:100015821-100100413	kit ligand	---	2811.74	2887.05
GSMG0003493	Slc6a15	1.11538	0.26119	0.694454	chr10:103367782-103419378	solute carrier family 6 (neurotransmitter transporter), member 15	---	805.431	722.075
GSMG0003495	Gm15663	-1.05517	0.545087	0.861536	chr10:105574551-105583872	predicted gene 15663	ENSMUSG00000085282	1303.08	1374.46
GSMG0003496	Ccdc59	1.27895	0.0116171	0.117678	chr10:105841061-105847828	coiled-coil domain containing 59	ENSMUSG00000019897	1910.81	1493.64
GSMG0003497	Ppfia2	-2.10597	0.000109941	0.00715273	chr10:106470310-106933467	protein tyrosine phosphatase, receptor type, f polypeptide (PTPRF), interacting protein (liprin), alpha 2	---	3359.38	7074.45
GSMG0003498	Lin7a	-1.15135	0.122412	0.470474	chr10:107271831-107425145	lin-7 homolog A (C. elegans)	---	13432.4	15465
GSMG0003503	Ppp1r12a	-1.78815	7.90246e-05	0.00584085	chr10:108162098-108279985	protein phosphatase 1, regulatory subunit 12A	---	1023.38	1830.14
GSMG0003507	Pawr	-1.2784	0.536382	0.855559	chr10:108332038-108414391	PRKC, apoptosis, WT1, regulator	ENSMUSG00000035873	81.2161	103.915
GSMG0003517	Csrp2	-1.01764	0.913795	0.966452	chr10:110920175-110939622	cysteine and glycine-rich protein 2	ENSMUSG00000020186	119.758	121.935
GSMG0003518	Osbpl8	-1.291	0.0172527	0.148745	chr10:111164801-111297247	oxysterol binding protein-like 8	---	2454.5	3168.99
GSMG0003527	Nap1l1	1.18339	0.0715813	0.344836	chr10:111473222-111498144	nucleosome assembly protein 1-like 1	---	3555.87	3004.75
GSMG0003529	Phlda1	1.05244	0.702424	0.905642	chr10:111506286-111508649	pleckstrin homology like domain, family A, member 1	ENSMUSG00000020205	916.448	870.392
GSMG0003531	Krr1	1.00721	0.940927	0.980269	chr10:111972695-111988430	KRR1, small subunit (SSU) processome component, homolog (yeast)	ENSMUSG00000063334	1314.35	1304.62
GSMG0003536	Kcnc2	-1.00445	0.975914	0.99042	chr10:112270017-112467024	potassium voltage gated channel, Shaw-related subfamily, member 2	---	162.865	163.069
GSMG0003548	Zfc3h1	-1.27476	0.220432	0.645943	chr10:115384957-115432771	zinc finger, C3H1-type containing	ENSMUSG00000034163	100.276	127.756
GSMG0003553	Ptprr	-1.29615	0.384208	0.793776	chr10:116018286-116274930	protein tyrosine phosphatase, receptor type, R	---	208.783	270.852
GSMG0003562	---	1.04931	0.712708	0.905642	chr10:116581278-116583515	---	---	255.808	244.152
GSMG0003568	4933412E12Rik	-1.30688	0.280844	0.710847	chr10:116950562-116963279	RIKEN cDNA 4933412E12 gene	ENSMUSG00000112627	107.507	140.547
GSMG0003581	Mdm1	1.08882	0.632181	0.905642	chr10:118141787-118168999	transformed mouse 3T3 cell double minute 1	---	195.809	180.242
GSMG0003590	Grip1	-1.68616	0.00804141	0.0930454	chr10:119454034-120087260	glutamate receptor interacting protein 1	---	194.044	327.412
GSMG0003600	Tmbim4	1.3962	0.00992796	0.106226	chr10:120208780-120224897	transmembrane BAX inhibitor motif containing 4	ENSMUSG00000020225	3457.21	2476.14
GSMG0003601	Llph	1.17261	0.0395487	0.243639	chr10:120227060-120232581	LLP homolog, long-term synaptic facilitation (Aplysia)	---	2727.63	2325.68
GSMG0003607	Wif1	1.08534	0.501067	0.845039	chr10:121034002-121100643	Wnt inhibitory factor 1	ENSMUSG00000020218	2966.05	2732.47
GSMG0003609	Gns	-1.23003	0.0520233	0.28555	chr10:121365085-121397254	glucosamine (N-acetyl)-6-sulfatase	ENSMUSG00000034707	8433.61	10373.3
GSMG0003613	BC048403	-1.01785	0.813676	0.943092	chr10:121739930-121752878	cDNA sequence BC048403	---	1853.83	1886.24
GSMG0003614	Avpr1a	1.62818	0.0421428	0.253773	chr10:122448490-122453453	arginine vasopressin receptor 1A	ENSMUSG00000020123	145.734	89.4997
GSMG0003617	Ppm1h	-1.01427	0.876602	0.948986	chr10:122678761-122945791	protein phosphatase 1H (PP2C domain containing)	---	2505.23	2541.37
GSMG0003626	Tafa2	1.09142	0.412454	0.802154	chr10:123264020-123741204	TAFA chemokine like family member 2	---	5699.79	5222.34
GSMG0003640	Mettl1	1.18082	0.0413797	0.250517	chr10:127041932-127046363	methyltransferase like 1	---	663.118	561.462
GSMG0003642	Cdk4	1.23892	0.0203815	0.164438	chr10:127063535-127067395	cyclin-dependent kinase 4	ENSMUSG00000006728	3837.67	3097.54
GSMG0003645	Agap2	-1.80855	0.0504331	0.280961	chr10:127078906-127093169	ArfGAP with GTPase domain, ankyrin repeat and PH domain 2	---	7467.9	13506.3
GSMG0003647	B4galnt1	-1.01874	0.810393	0.9415	chr10:127165130-127172340	beta-1,4-N-acetyl-galactosaminyl transferase 1	---	6888.08	7017.56
GSMG0003650	Dctn2	-1.14894	0.167172	0.560688	chr10:127266262-127281959	dynactin 2	ENSMUSG00000025410	9849.76	11316.8
GSMG0003652	Ddit3	1.47879	0.00174891	0.0375665	chr10:127290793-127296288	DNA-damage inducible transcript 3	---	1163.82	787.306
GSMG0003655	R3hdm2	-1.43679	0.000268756	0.0120803	chr10:127380668-127499383	R3H domain containing 2	---	8818.24	12669.4
GSMG0003662	Stat6	-1.10025	0.443297	0.830846	chr10:127642985-127660987	signal transducer and activator of transcription 6	ENSMUSG00000002147	852.835	938.408
GSMG0003667	Zbtb39	-1.29812	0.0189269	0.157442	chr10:127739530-127747337	zinc finger and BTB domain containing 39	ENSMUSG00000044617	815.867	1058.98
GSMG0003673	Prim1	1.22957	0.0946188	0.406481	chr10:128015172-128030030	DNA primase, p49 subunit	ENSMUSG00000025395	559.68	455.388
GSMG0003674	Naca	1.48196	2.22207e-05	0.00268641	chr10:128035346-128048637	nascent polypeptide-associated complex alpha polypeptide	---	11558.9	7799.35
GSMG0003675	Ptges3	1.22238	0.092657	0.401332	chr10:128058950-128077270	prostaglandin E synthase 3	ENSMUSG00000071072	10616.8	8685.14
GSMG0003676	---	1.03706	0.845097	0.948986	chr10:128061000-128062263	---	---	128.908	124.015
GSMG0003678	Atp5b	1.23977	0.0167662	0.1463	chr10:128083301-128090388	ATP synthase, H+ transporting mitochondrial F1 complex, beta subunit	ENSMUSG00000025393	301090	242859
GSMG0003680	Baz2a	-1.49774	0.0182224	0.153676	chr10:128091576-128129303	bromodomain adjacent to zinc finger domain, 2A	---	806.09	1207.53
GSMG0003682	Gls2	1.33407	0.000191177	0.00987547	chr10:128194635-128210004	glutaminase 2 (liver, mitochondrial)	ENSMUSG00000044005	1749.28	1310.7
GSMG0003685	Timeless	-1.33535	0.413933	0.803818	chr10:128232063-128252935	timeless circadian clock 1	---	51.6279	69.2077
GSMG0003688	Stat2	-1.73778	0.000162448	0.00897705	chr10:128270498-128292853	signal transducer and activator of transcription 2	ENSMUSG00000040033	447.255	777.796
GSMG0003689	Pan2	-1.32147	0.168001	0.561558	chr10:128303334-128321358	PAN2 poly(A) specific ribonuclease subunit	---	117.168	154.056
GSMG0003690	Cnpy2	1.44788	0.00344362	0.0561849	chr10:128322459-128327553	canopy FGF signaling regulator 2	---	4124.24	2848.54
GSMG0003691	Cs	1.05558	0.469395	0.845039	chr10:128337727-128362482	citrate synthase	ENSMUSG00000005683	15536	14717.7
GSMG0003693	Ankrd52	-1.3812	0.0474171	0.271247	chr10:128377113-128394006	ankyrin repeat domain 52	ENSMUSG00000014498	1369.11	1891.52
GSMG0003694	---	-1.22395	0.23709	0.668715	chr10:128395225-128395969	---	---	836.698	1024.07
GSMG0003695	Rnf41	1.21664	0.0289566	0.203315	chr10:128411616-128441440	ring finger protein 41	---	7209.19	5925.65
GSMG0003697	Smarcc2	-1.49455	0.00379342	0.0592269	chr10:128459236-128490591	SWI/SNF related, matrix associated, actin dependent regulator of chromatin, subfamily c, member 2	---	9001.42	13453.4
GSMG0003700	A430046D13Rik	1.06788	0.645714	0.905642	chr10:128499243-128504242	Riken cDNA A430046D13 gene	---	895.914	839.308
GSMG0003706	Pym1	1.14587	0.0830135	0.375944	chr10:128747879-128766568	PYM homolog 1, exon junction complex associated factor	---	3981.68	3475.03
GSMG0003708	Dnajc14	1.13411	0.0704342	0.34118	chr10:128805551-128819448	DnaJ heat shock protein family (Hsp40) member C14	---	5227.05	4608.68
GSMG0003710	Sarnp	1.48911	8.9642e-05	0.00635726	chr10:128821764-128877638	SAP domain containing ribonucleoprotein	---	660.003	442.97
GSMG0003712	Cd63	1.11954	0.405244	0.794758	chr10:128908919-128912825	CD63 antigen	---	651.89	582.109
GSMG0003713	Itga7	-1.43231	0.0501903	0.280302	chr10:128933813-128958282	integrin alpha 7	---	108.593	155.908
GSMG0003731	---	1.15463	0.40757	0.798142	chr10:130328743-130330475	---	---	180.222	156.187
GSMG0003742	Armt1	-1.03112	0.827628	0.944886	chr10:4429296-4455139	acidic residue methyltransferase 1	ENSMUSG00000061759	263.3	270.959
GSMG0003746	Akap12	-2.441	3.41345e-05	0.00330392	chr10:4266329-4359471	A kinase (PRKA) anchor protein (gravin) 12	ENSMUSG00000038587	815.17	1990.43
GSMG0003748	Mthfd1l	1.30147	0.0145625	0.134162	chr10:3973075-4167081	methylenetetrahydrofolate dehydrogenase (NADP+ dependent) 1-like	---	738.807	567.589
GSMG0003757	Ppp1r14c	1.00363	0.970724	0.99042	chr10:3366057-3464975	protein phosphatase 1, regulatory inhibitor subunit 14C	ENSMUSG00000040653	4889.34	4871.71
GSMG0003760	Pcmt1	1.16688	0.0346824	0.225643	chr10:7627845-7681160	protein-L-isoaspartate (D-aspartate) O-methyltransferase 1	---	12013.3	10294.7
GSMG0003764	Ginm1	1.23992	0.139253	0.507623	chr10:7767947-7780919	glycoprotein integral membrane 1	---	301.718	243.167
GSMG0003767	Tab2	-1.28031	0.118687	0.462919	chr10:7905648-7956123	TGF-beta activated kinase 1/MAP3K7 binding protein 2	ENSMUSG00000015755	1392.89	1783.06
GSMG0003769	Ust	3.84236	1.51518e-23	1.59366e-19	chr10:8204753-8518826	uronyl-2-sulfotransferase	ENSMUSG00000047712	1855.5	482.929
GSMG0003778	Sash1	-2.08957	0.000142052	0.0082547	chr10:8722219-8886070	SAM and SH3 domain containing 1	ENSMUSG00000015305	164.313	342.653
GSMG0003794	---	-1.21954	0.169252	0.563649	chr10:9622947-9624850	---	---	1076.82	1312.63
GSMG0003795	Samd5	-1.04281	0.722076	0.905642	chr10:9627259-9675209	sterile alpha motif domain containing 5	ENSMUSG00000060487	1562.7	1629.26
GSMG0003796	Stxbp5	-1.26836	0.0259147	0.190031	chr10:9755547-9901040	syntaxin binding protein 5 (tomosyn)	---	1310.34	1662.11
GSMG0003802	Grm1	-1.38264	0.0570675	0.300719	chr10:10686059-11082356	glutamate receptor, metabotropic 1	---	6518.94	9013.57
GSMG0003807	Utrn	-1.46799	0.0225648	0.174984	chr10:12381798-12869367	utrophin	---	3263.47	4790.45
GSMG0003816	Ltv1	1.28965	0.00622035	0.0798302	chr10:13178140-13193137	LTV1 ribosome biogenesis factor	ENSMUSG00000019814	1174.19	910.162
GSMG0003818	Phactr2	-1.55035	0.0069875	0.0852605	chr10:13207717-13474396	phosphatase and actin regulator 2	---	834.812	1294.35
GSMG0003822	Pex3	1.22216	0.0113179	0.115574	chr10:13523842-13553142	peroxisomal biogenesis factor 3	---	1529.97	1252.15
GSMG0003823	Aig1	1.28098	0.00251997	0.0465466	chr10:13647057-13868980	androgen-induced 1	---	4203.04	3280.73
GSMG0003835	Vta1	1.2387	0.00124639	0.0310275	chr10:14654755-14705562	vesicle (multivesicular body) trafficking 1	---	4062.41	3279.31
GSMG0003843	Heca	1.06905	0.491528	0.845039	chr10:17868612-17948068	hdc homolog, cell cycle regulator	ENSMUSG00000039879	3610.72	3377.59
GSMG0003844	Abracl	1.50128	0.000377763	0.0147342	chr10:18011263-18026109	ABRA C-terminal like	---	2059.71	1371.59
GSMG0003847	Ccdc28a	-1.02677	0.780288	0.926375	chr10:18213677-18234983	coiled-coil domain containing 28A	---	1033.9	1061.26
GSMG0003849	Hebp2	-1.11373	0.272424	0.706034	chr10:18540123-18546076	heme binding protein 2	ENSMUSG00000019853	961.289	1070.14
GSMG0003850	---	-1.58067	0.00281989	0.0501006	chr10:18581844-18585109	---	---	1129.17	1784.87
GSMG0003851	Arfgef3	-1.81935	0.03306	0.21957	chr10:18585490-18743956	ARFGEF family member 3	ENSMUSG00000019852	1037.96	1888.41
GSMG0003855	Tnfaip3	-1.07809	0.677159	0.905642	chr10:19000913-19015410	tumor necrosis factor, alpha-induced protein 3	---	145.836	156.938
GSMG0003861	---	1.39872	0.12415	0.47415	chr10:19716152-19718705	---	---	96.0247	68.3009
GSMG0003862	Slc35d3	1.24469	0.217049	0.640641	chr10:19847917-19851460	solute carrier family 35, member D3	ENSMUSG00000050473	197.626	158.76
GSMG0003863	Pex7	-1.0897	0.305102	0.739528	chr10:19860090-19907674	peroxisomal biogenesis factor 7	---	1311.49	1429.3
GSMG0003870	Pde7b	-2.34366	0.00895329	0.0993659	chr10:20397053-20725079	phosphodiesterase 7B	---	105.441	247.476
GSMG0003882	Gm34267	-2.70361	0.468747	0.845039	chr10:22054388-22058654	predicted gene, 34267	---	219.522	593.382
GSMG0003888	Tbpl1	1.17822	0.148234	0.524722	chr10:22703877-22731934	TATA box binding protein-like 1	---	2742.35	2327.18
GSMG0003895	Rps12	1.48096	0.0174703	0.149688	chr10:23785183-23787209	ribosomal protein S12	ENSMUSG00000061983	3971.87	2681.93
GSMG0003902	Gm15270	-1.71886	0.00695657	0.0850088	chr10:24331688-24595813	predicted gene 15270	---	768.233	1319.1
GSMG0003905	Enpp1	1.39713	0.230241	0.659902	chr10:24637916-24712159	ectonucleotide pyrophosphatase/phosphodiesterase 1	---	84.5686	60.2834
GSMG0003906	Enpp3	-1.69619	0.391131	0.793776	chr10:24773491-24836200	ectonucleotide pyrophosphatase/phosphodiesterase 3	ENSMUSG00000019989	203.702	345.192
GSMG0003908	Arg1	-1.13848	0.745591	0.910597	chr10:24915208-24927484	arginase, liver	ENSMUSG00000019987	23.4561	26.8848
GSMG0003909	Akap7	1.1351	0.280003	0.709427	chr10:25130451-25299217	A kinase (PRKA) anchor protein 7	---	7641.44	6732.25
GSMG0003919	L3mbtl3	-1.21694	0.088518	0.391007	chr10:26274469-26375972	L3MBTL3 histone methyl-lysine binding protein	---	716.696	871.588
GSMG0003929	---	-1.52812	0.0312366	0.212045	chr10:29143282-29144195	---	---	96.8306	147.223
GSMG0003933	Rnf146	1.24073	0.0211273	0.167568	chr10:29344178-29362442	ring finger protein 146	---	825.723	664.987
GSMG0003935	Rspo3	1.07379	0.471068	0.845039	chr10:29452418-29535868	R-spondin 3	ENSMUSG00000019880	2549.06	2373.24
GSMG0003938	Cenpw	1.23184	0.0817531	0.372351	chr10:30194584-30200540	centromere protein W	ENSMUSG00000075266	322.612	262.232
GSMG0003941	Trmt11	1.00721	0.936297	0.978142	chr10:30534225-30600749	tRNA methyltransferase 11	ENSMUSG00000019792	508.898	505.538
GSMG0003942	Gm20300	1.09044	0.408038	0.798464	chr10:30603197-30606634	predicted gene, 20300	ENSMUSG00000111080	4151.42	3807.07
GSMG0003943	Hint3	1.19391	0.12073	0.466793	chr10:30608207-30618462	histidine triad nucleotide binding protein 3	ENSMUSG00000019791	1382.22	1157.62
GSMG0003945	Ncoa7	-1.88777	3.6999e-05	0.00341706	chr10:30629026-30803328	nuclear receptor coactivator 7	---	3138.7	5923.42
GSMG0003947	Hey2	1.24105	0.189565	0.597396	chr10:30832359-30842784	hairy/enhancer-of-split related with YRPW motif 2	ENSMUSG00000019789	276.376	222.215
GSMG0003949	Tpd52l1	-1.529	0.276974	0.706511	chr10:31332373-31445958	tumor protein D52-like 1	---	620.726	949.012
GSMG0003953	---	-1.20101	0.303658	0.738731	chr10:31494035-31496936	---	---	237.054	283.964
GSMG0003954	---	-1.56981	0.00878638	0.0984667	chr10:31499859-31501506	---	---	81.1205	126.878
GSMG0003958	Nkain2	1.18477	0.333624	0.754582	chr10:31689319-32890495	Na+/K+ transporting ATPase interacting 2	---	2448.37	2066.72
GSMG0003972	Clvs2	1.24134	0.0123505	0.121683	chr10:33512286-33624770	clavesin 2	ENSMUSG00000019785	10618	8553.01
GSMG0003975	Zup1	1.44093	0.00612794	0.0791814	chr10:33919141-33951271	zinc finger containing ubiquitin peptidase 1	---	712.268	493.975
GSMG0003976	---	-1.54144	0.0317883	0.214144	chr10:33987214-33992240	---	---	401.498	618.439
GSMG0003978	Rwdd1	1.3858	0.00214449	0.0426116	chr10:33996555-34019616	RWD domain containing 1	ENSMUSG00000019782	3114.96	2247.65
GSMG0003985	---	-4.00863	0.0189678	0.157525	chr10:34295912-34298908	---	---	54.3995	218.331
GSMG0003990	Marcks	-1.26232	0.0133327	0.127637	chr10:37133243-37138926	myristoylated alanine rich protein kinase C substrate	ENSMUSG00000069662	9519.83	12017.4
GSMG0003994	Fam229b	1.3434	0.0133262	0.127637	chr10:39118804-39133914	family with sequence similarity 229, member B	---	1007.76	750.525
GSMG0003998	E130307A14Rik	1.17604	0.156611	0.541782	chr10:39621411-39732007	RIKEN cDNA E130307A14 gene	ENSMUSG00000087177	686.276	583.572
GSMG0004008	Slc16a10	-1.47111	0.139725	0.508756	chr10:40033452-40142260	solute carrier family 16 (monocarboxylic acid transporters), member 10	---	44.6594	66.227
GSMG0004012	Rpf2	1.33203	0.00966644	0.104386	chr10:40217022-40247040	ribosome production factor 2 homolog	---	2064.66	1549.95
GSMG0004014	Gtf3c6	1.2573	0.000562243	0.0189947	chr10:40247702-40257712	general transcription factor IIIC, polypeptide 6, alpha	---	4826.37	3838.6
GSMG0004018	Cdc40	-1.04031	0.77846	0.925458	chr10:40831621-40883143	cell division cycle 40	ENSMUSG00000038446	525.442	546.499
GSMG0004019	Gpr6	1.12332	0.580906	0.890059	chr10:41069981-41072290	G protein-coupled receptor 6	ENSMUSG00000046922	265.22	235.839
GSMG0004020	Fig4	-1.00933	0.919434	0.96955	chr10:41188172-41303243	FIG4 phosphoinositide 5-phosphatase	ENSMUSG00000038417	2092.82	2112.41
GSMG0004022	Smpd2	1.06689	0.66424	0.905642	chr10:41485642-41490353	sphingomyelin phosphodiesterase 2, neutral	ENSMUSG00000019822	151.036	141.408
GSMG0004024	Cep57l1	-1.04844	0.732582	0.905642	chr10:41718840-41809877	centrosomal protein 57-like 1	---	209.03	218.769
GSMG0004029	Foxo3	-1.25582	0.0254272	0.187768	chr10:42180207-42276756	forkhead box O3	ENSMUSG00000048756	5026.04	6312.05
GSMG0004032	Afg1l	1.13574	0.105682	0.434029	chr10:42312580-42478565	AFG1 like ATPase	---	1109.43	976.527
GSMG0004040	Sobp	-1.77201	5.66025e-06	0.00106312	chr10:43002501-43174530	sine oculis binding protein	ENSMUSG00000038248	1843.17	3266.87
GSMG0004047	Mtres1	1.30578	0.00424742	0.0631588	chr10:43525117-43541018	mitochondrial transcription rescue factor 1	ENSMUSG00000019797	2419.2	1853.04
GSMG0004048	Qrsl1	1.1427	0.145186	0.519602	chr10:43874190-43901745	glutaminyl-tRNA synthase (glutamine-hydrolyzing)-like 1	ENSMUSG00000019863	1837.31	1607.76
GSMG0004056	---	1.09193	0.510752	0.845039	chr10:45066412-45067080	---	---	148.434	136.114
GSMG0004061	Grik2	-1.54676	0.387082	0.793776	chr10:49093335-49788755	glutamate receptor, ionotropic, kainate 2 (beta 2)	---	162.397	251.285
GSMG0004083	Gopc	-1.02778	0.717786	0.905642	chr10:52337024-52382124	golgi associated PDZ and coiled-coil motif containing	---	1862.97	1914.92
GSMG0004096	Mcm9	-1.14962	0.53579	0.855103	chr10:53536315-53630439	minichromosome maintenance 9 homologous recombination repair factor	---	61.9729	71.5635
GSMG0004102	Man1a	-1.21654	0.343162	0.766866	chr10:53904785-54075797	mannosidase 1, alpha	---	73.0894	88.7993
GSMG0004109	Tbc1d32	-1.24678	0.0872996	0.387379	chr10:56014296-56228689	TBC1 domain family, member 32	ENSMUSG00000038122	495.769	618.262
GSMG0004113	Serinc1	1.16625	0.08737	0.387637	chr10:57515778-57532529	serine incorporator 1	ENSMUSG00000019877	52699.5	45187.3
GSMG0004123	Mcu	-1.1413	0.0560275	0.29849	chr10:59446984-59616694	mitochondrial calcium uniporter	ENSMUSG00000009647	7944.06	9067.06
GSMG0004126	---	1.04105	0.877773	0.948986	chr10:59516800-59517678	---	---	54.4135	52.266
GSMG0004128	---	1.22853	0.461219	0.84323	chr10:59893884-59897716	---	---	176.199	143.593
GSMG0004130	Ddit4	1.0986	0.346483	0.77106	chr10:59949675-59951770	DNA-damage-inducible transcript 4	ENSMUSG00000020108	4916.65	4475.87
GSMG0004131	Anapc16	-1.11577	0.327826	0.750602	chr10:59986575-60003135	anaphase promoting complex subunit 16	---	4387.96	4896.56
GSMG0004135	Cdh23	-1.67698	0.00590184	0.0773469	chr10:60302750-60696491	cadherin 23 (otocadherin)	---	300.676	504.226
GSMG0004136	Slc29a3	-1.18829	0.324191	0.750602	chr10:60712072-60752794	solute carrier family 29 (nucleoside transporters), member 3	ENSMUSG00000020100	91.5275	108.796
GSMG0004138	Unc5b	-1.33802	0.0779144	0.361918	chr10:60762610-60831584	unc-5 netrin receptor B	---	576.532	771.367
GSMG0004141	Sgpl1	-1.07493	0.519331	0.845039	chr10:61098644-61147684	sphingosine phosphate lyase 1	---	3291.03	3538.09
GSMG0004148	D830039M14Rik	1.56644	0.00424954	0.0631606	chr10:61474674-61476939	RIKEN cDNA D830039M14 gene	---	131.85	84.3529
GSMG0004151	Macroh2a2	1.04397	0.514504	0.845039	chr10:61738643-61783953	macroH2A.2 histone	ENSMUSG00000020086	2474.99	2370.91
GSMG0004155	Fam241b	1.28637	0.0615652	0.31518	chr10:62107656-62111050	family with sequence similarity 241, member B	---	5555.12	4318.57
GSMG0004158	Hk1	-1.11119	0.327301	0.750602	chr10:62268855-62379908	hexokinase 1	---	42493.5	47218.9
GSMG0004159	Hkdc1	-1.24925	0.052062	0.285599	chr10:62383139-62422457	hexokinase domain containing 1	ENSMUSG00000020080	1160.38	1449.47
GSMG0004160	Supv3l1	1.16606	0.0349022	0.226373	chr10:62429221-62449738	suppressor of var1, 3-like 1 (S. cerevisiae)	ENSMUSG00000020079	2099.72	1800.81
GSMG0004161	Vps26a	1.20519	0.070933	0.342812	chr10:62454766-62486805	VPS26 retromer complex component A	---	2217.32	1839.85
GSMG0004164	Kifbp	1.01039	0.880056	0.949714	chr10:62538626-62578464	kinesin family binding protein	---	5352.19	5297.3
GSMG0004165	Ddx21	-1.22358	0.153621	0.535393	chr10:62580248-62602298	DExD box helicase 21	ENSMUSG00000020075	556.331	680.421
GSMG0004166	Ddx50	1.14229	0.198655	0.611606	chr10:62615792-62651218	DExD box helicase 50	---	3332.61	2916.45
GSMG0004168	Ccar1	-1.73245	0.00482283	0.0677558	chr10:62743928-62792368	cell division cycle and apoptosis regulator 1	---	573.749	994.11
GSMG0004174	Hnrnph3	1.06651	0.611219	0.905642	chr10:63014664-63023849	heterogeneous nuclear ribonucleoprotein H3	---	264.462	247.407
GSMG0004176	Mypn	1.04313	0.748616	0.911687	chr10:63115795-63203952	myopalladin	ENSMUSG00000020067	366.663	351.685
GSMG0004178	Sirt1	1.06316	0.637202	0.905642	chr10:63319005-63339039	sirtuin 1	---	339.022	319.065
GSMG0004184	Lrrtm3	-1.13127	0.307689	0.743402	chr10:63928497-64090276	leucine rich repeat transmembrane neuronal 3	ENSMUSG00000042846	525.112	593.736
GSMG0004195	Reep3	-1.37091	0.0913968	0.397565	chr10:67009189-67096988	receptor accessory protein 3	---	68.5661	93.6825
GSMG0004197	Nrbf2	1.15734	0.113186	0.450489	chr10:67266689-67285283	nuclear receptor binding factor 2	ENSMUSG00000075000	2651.86	2290.73
GSMG0004201	Ado	1.05975	0.580031	0.889296	chr10:67544512-67548960	2-aminoethanethiol (cysteamine) dioxygenase	ENSMUSG00000057134	8510.93	8031.15
GSMG0004204	Zfp365	-1.15398	0.141665	0.512394	chr10:67886107-67912662	zinc finger protein 365	ENSMUSG00000037855	9972.3	11508.1
GSMG0004206	Arid5b	-1.29079	0.260964	0.694246	chr10:68092524-68278740	AT rich interactive domain 5B (MRF1-like)	---	295.672	381.539
GSMG0004215	Cabcoco1	-1.0588	0.793619	0.931513	chr10:68430953-68541876	ciliary associated calcium binding coiled-coil 1	ENSMUSG00000019945	133.139	141.126
GSMG0004219	A930033H14Rik	-1.772	1.29474e-05	0.00192572	chr10:69209762-69213099	RIKEN cDNA A930033H14 gene	ENSMUSG00000090622	195.104	345.166
GSMG0004225	---	1.4049	0.0273554	0.196847	chr10:70439218-70440770	---	---	281.597	200.441
GSMG0004226	Phyhipl	1.0991	0.315558	0.750602	chr10:70557686-70599292	phytanoyl-CoA hydroxylase interacting protein-like	---	11565.1	10522.2
GSMG0004235	Tfam	1.21261	0.0354595	0.228458	chr10:71225464-71238282	transcription factor A, mitochondrial	---	4716.52	3889.51
GSMG0004236	Ube2d1	1.2274	0.0172348	0.148745	chr10:71254980-71285262	ubiquitin-conjugating enzyme E2D 1	ENSMUSG00000019927	11234.1	9152.06
GSMG0004237	Cisd1	1.37261	0.00102427	0.0273664	chr10:71330492-71344889	CDGSH iron sulfur domain 1	ENSMUSG00000037710	24346.8	17737.5
GSMG0004248	Gucd1	1.02204	0.915716	0.967213	chr10:75351111-75517973	guanylyl cyclase domain containing 1	---	165.206	161.989
GSMG0004251	Lrrc75b	-1.6708	0.0132442	0.126985	chr10:75550125-75560330	leucine rich repeat containing 75B	ENSMUSG00000046807	196.588	329.262
GSMG0004253	Susd2	-1.00275	0.98171	0.992756	chr10:75636619-75644010	sushi domain containing 2	---	2069.98	2076.04
GSMG0004254	Cabin1	-1.50703	0.00237882	0.0450278	chr10:75646110-75764357	calcineurin binding protein 1	ENSMUSG00000020196	670.971	1011.71
GSMG0004255	Ddt	1.49299	0.000343108	0.0138092	chr10:75771226-75773417	D-dopachrome tautomerase	ENSMUSG00000001666	6574.94	4404.09
GSMG0004257	Gstt1	1.07562	0.853001	0.948986	chr10:75783815-75798584	glutathione S-transferase, theta 1	---	55.9597	52.0588
GSMG0004262	Smarcb1	1.01325	0.842175	0.948986	chr10:75896766-75921616	SWI/SNF related, matrix associated, actin dependent regulator of chromatin, subfamily b, member 1	---	5251.84	5183.51
GSMG0004263	Mmp11	-1.52733	0.0738512	0.351425	chr10:75923224-75932502	matrix metallopeptidase 11	---	46.5727	71.3898
GSMG0004266	Prmt2	1.33399	0.000503578	0.0178338	chr10:76207229-76237865	protein arginine N-methyltransferase 2	---	11927.7	8941.29
GSMG0004267	Dip2a	-1.32599	0.0644858	0.324476	chr10:76262738-76345293	disco interacting protein 2 homolog A	---	822.057	1090.04
GSMG0004268	Pcnt	-2.09339	0.000251173	0.011604	chr10:76351254-76442912	pericentrin (kendrin)	---	111.123	233.102
GSMG0004269	Ybey	1.26559	0.00756022	0.089447	chr10:76459569-76469114	ybeY metallopeptidase	ENSMUSG00000033126	1117.26	882.76
GSMG0004275	Pcbp3	1.03968	0.65729	0.905642	chr10:76761854-76961947	poly(rC) binding protein 3	---	18392	17689.9
GSMG0004283	Gm10941	1.43134	0.326492	0.750602	chr10:77257776-77259224	predicted gene 10941	ENSMUSG00000078444	56.3177	39.5013
GSMG0004284	Adarb1	-1.55667	0.00516871	0.0706033	chr10:77290393-77418273	adenosine deaminase, RNA-specific, B1	---	13222.6	20582.9
GSMG0004285	Fam207a	-1.18061	0.0765472	0.358417	chr10:77486656-77516430	family with sequence similarity 207, member A	ENSMUSG00000032977	3202.9	3781.35
GSMG0004289	Lrrc3	-1.25016	0.0135783	0.12896	chr10:77897578-77902536	leucine rich repeat containing 3	ENSMUSG00000051652	1086.94	1359.76
GSMG0004290	Trpm2	-1.22534	0.0908383	0.39626	chr10:77907722-77969872	transient receptor potential cation channel, subfamily M, member 2	---	436.325	534.944
GSMG0004291	Pfkl	1.02976	0.745412	0.910497	chr10:77984993-78009807	phosphofructokinase, liver, B-type	ENSMUSG00000020277	15885.7	15427.1
GSMG0004293	Gatd3a	1.04077	0.578829	0.88809	chr10:78162066-78169770	glutamine amidotransferase like class 1 domain containing 3A	---	10704.6	10285.5
GSMG0004294	Pwp2	1.13593	0.220403	0.645917	chr10:78170910-78185151	PWP2 periodic tryptophan protein homolog (yeast)	ENSMUSG00000032834	499.663	439.708
GSMG0004298	Agpat3	-1.06762	0.358542	0.780894	chr10:78271554-78352445	1-acylglycerol-3-phosphate O-acyltransferase 3	---	2891.39	3087.11
GSMG0004299	Rrp1	-1.18633	0.0333017	0.220582	chr10:78400362-78413043	ribosomal RNA processing 1	ENSMUSG00000061032	18262.9	21665.8
GSMG0004300	Pdxk	1.06577	0.438735	0.827246	chr10:78436748-78464983	pyridoxal (pyridoxine, vitamin B6) kinase	ENSMUSG00000032788	3584.6	3363.55
GSMG0004303	Syde1	1.21723	0.22812	0.657481	chr10:78584503-78591964	synapse defective 1, Rho GTPase, homolog 1 (C. elegans)	ENSMUSG00000032714	390.294	320.168
GSMG0004306	Ccdc105	1.26487	0.418844	0.808628	chr10:78746924-78753068	coiled-coil domain containing 105	ENSMUSG00000078442	62.8336	49.8407
GSMG0004308	2610008E11Rik	-1.05363	0.655916	0.905642	chr10:79064374-79097602	RIKEN cDNA 2610008E11 gene	ENSMUSG00000060301	1172.38	1234.9
GSMG0004309	Plpp2	1.22572	0.64708	0.905642	chr10:79526424-79533787	phospholipid phosphatase 2	---	26.6245	21.8535
GSMG0004310	Mier2	1.05387	0.562317	0.875437	chr10:79540245-79555128	MIER family member 2	---	809.943	768.286
GSMG0004312	C2cd4c	-1.03095	0.925456	0.972508	chr10:79606855-79614027	C2 calcium-dependent domain containing 4C	---	664.225	684.943
GSMG0004313	Shc2	-1.3753	0.00054541	0.0186658	chr10:79617940-79637918	SHC (Src homology 2 domain containing) transforming protein 2	ENSMUSG00000020312	1861.38	2560.34
GSMG0004316	Polrmt	-1.17231	0.145751	0.520371	chr10:79736123-79746586	polymerase (RNA) mitochondrial (DNA directed)	---	956.87	1121.73
GSMG0004317	Rnf126	1.03877	0.664873	0.905642	chr10:79758515-79766952	ring finger protein 126	---	4023	3873.03
GSMG0004321	Plppr3	-1.03832	0.718352	0.905642	chr10:79860476-79874634	phospholipid phosphatase related 3	---	3215.16	3338.94
GSMG0004322	Med16	-1.05471	0.542216	0.859141	chr10:79894706-79908938	mediator complex subunit 16	---	5621.88	5930.23
GSMG0004323	R3hdm4	1.36246	0.024967	0.185807	chr10:79910052-79917006	R3H domain containing 4	ENSMUSG00000035781	11668.5	8564.55
GSMG0004324	Tmem259	1.02834	0.721927	0.905642	chr10:79527651-79984260	transmembrane protein 259	---	3987.97	3878.43
GSMG0004325	Polr2e	1.24284	0.048654	0.275452	chr10:80035950-80039723	polymerase (RNA) II (DNA directed) polypeptide E	ENSMUSG00000004667	5930.13	4771.56
GSMG0004330	Gamt	1.31691	0.0491699	0.277352	chr10:80258152-80261012	guanidinoacetate methyltransferase	---	315.303	239.648
GSMG0004331	2310011J03Rik	1.04014	0.718634	0.905642	chr10:80318255-80320548	RIKEN cDNA 2310011J03 gene	ENSMUSG00000020133	3991.89	3838.35
GSMG0004333	Adamtsl5	1.44257	0.42885	0.818281	chr10:80339793-80348448	ADAMTS-like 5	---	32.4725	22.6018
GSMG0004334	Mex3d	-1.02118	0.845068	0.948986	chr10:80380357-80387651	mex3 RNA binding family member D	ENSMUSG00000048696	1484.05	1515.59
GSMG0004335	Mbd3	-1.02421	0.765062	0.920081	chr10:80392541-80399531	methyl-CpG binding domain protein 3	---	7022.64	7192.79
GSMG0004336	Uqcr11	1.43151	0.00754226	0.0893117	chr10:80402997-80406831	ubiquinol-cytochrome c reductase, complex III subunit XI	ENSMUSG00000020163	34397.1	24028.7
GSMG0004337	Tcf3	-1.26752	0.0315555	0.213217	chr10:80409326-80433676	transcription factor 3	---	577.501	732.777
GSMG0004339	Rexo1	-1.45209	0.000307001	0.0130028	chr10:80540922-80561560	REX1, RNA exonuclease 1	ENSMUSG00000047417	1104.07	1604.19
GSMG0004340	Klf16	1.02442	0.899002	0.958997	chr10:80567121-80577323	Kruppel-like factor 16	ENSMUSG00000035397	3308.47	3229.78
GSMG0004341	Abhd17a	1.2712	0.113951	0.451995	chr10:80583649-80590341	abhydrolase domain containing 17A	ENSMUSG00000003346	8022.37	6311.08
GSMG0004342	Btbd2	-1.1084	0.162787	0.553755	chr10:80642617-80656494	BTB (POZ) domain containing 2	ENSMUSG00000003344	11833.1	13116.4
GSMG0004343	Mknk2	-1.13682	0.121206	0.467555	chr10:80665318-80676295	MAP kinase-interacting serine/threonine kinase 2	---	4179.43	4751.5
GSMG0004345	Ap3d1	-1.09042	0.409624	0.799622	chr10:80706956-80742275	adaptor-related protein complex 3, delta 1 subunit	ENSMUSG00000020198	20711.8	22584.7
GSMG0004346	Plekhj1	1.30347	0.0183478	0.154339	chr10:80796097-80798626	pleckstrin homology domain containing, family J member 1	ENSMUSG00000035278	3780.92	2900.76
GSMG0004347	Jsrp1	-1.13487	0.7421	0.908462	chr10:80808496-80813498	junctional sarcoplasmic reticulum protein 1	ENSMUSG00000020216	67.7522	76.8801
GSMG0004348	Lingo3	-1.12698	0.357022	0.78062	chr10:80832805-80844039	leucine rich repeat and Ig domain containing 3	ENSMUSG00000051067	946.821	1067.04
GSMG0004349	Lsm7	1.47946	0.00414732	0.0624161	chr10:80852821-80855211	LSM7 homolog, U6 small nuclear RNA and mRNA degradation associated	---	2281.96	1542.43
GSMG0004350	Timm13	1.40868	0.00585913	0.0769687	chr10:80899450-80900970	translocase of inner mitochondrial membrane 13	ENSMUSG00000020219	16685	11844.5
GSMG0004351	Lmnb2	-1.06153	0.565944	0.878137	chr10:80901364-80918245	lamin B2	---	549.671	583.589
GSMG0004352	Gng7	-1.06155	0.731695	0.905642	chr10:80948624-81014925	guanine nucleotide binding protein (G protein), gamma 7	---	10033.3	10650.9
GSMG0004354	Slc39a3	-1.00916	0.880097	0.949714	chr10:81028539-81037315	solute carrier family 39 (zinc transporter), member 3	---	9154.51	9238.87
GSMG0004355	Sgta	-1.0009	0.990239	0.996111	chr10:81044071-81060271	small glutamine-rich tetratricopeptide repeat (TPR)-containing, alpha	---	20810.9	20829.8
GSMG0004357	Pias4	-1.05021	0.624241	0.905642	chr10:81153288-81167923	protein inhibitor of activated STAT 4	ENSMUSG00000004934	1255.04	1318.26
GSMG0004360	Atcay	-1.23856	0.0294627	0.204665	chr10:81204504-81230820	ataxia, cerebellar, Cayman type	ENSMUSG00000034958	8029.75	9945.41
GSMG0004362	Mrpl54	1.4186	0.00279655	0.0499104	chr10:81264714-81266928	mitochondrial ribosomal protein L54	ENSMUSG00000034932	5803.12	4090.87
GSMG0004366	Hmg20b	1.08241	0.337088	0.759314	chr10:81346048-81350459	high mobility group 20B	---	1314.74	1215.33
GSMG0004368	Fzr1	-1.01429	0.857533	0.948986	chr10:81365960-81378465	fizzy and cell division cycle 20 related 1	ENSMUSG00000020235	6594.63	6689.36
GSMG0004369	Nfic	-1.60456	0.000200265	0.0100905	chr10:81396191-81431138	nuclear factor I/C	---	634.797	1018.1
GSMG0004370	Celf5	-1.82979	0.0016575	0.036233	chr10:81459227-81482699	CUGBP, Elav-like family member 5	---	785.488	1437.6
GSMG0004371	Ncln	-1.03595	0.640669	0.905642	chr10:81486249-81496364	nicalin	---	4426.44	4585.97
GSMG0004374	Gna11	-1.12514	0.0757415	0.356422	chr10:81528724-81545162	guanine nucleotide binding protein, alpha 11	ENSMUSG00000034781	10529.9	11848.5
GSMG0004376	Sirt6	-1.02297	0.875666	0.948986	chr10:81619832-81627566	sirtuin 6	---	837.865	857.745
GSMG0004382	Zfp938	1.19142	0.0574308	0.301951	chr10:82224850-82241281	zinc finger protein 938	ENSMUSG00000062931	2417.68	2029.06
GSMG0004387	1190007I07Rik	1.09886	0.493166	0.845039	chr10:82619851-82623228	RIKEN cDNA 1190007I07 gene	---	506.982	461.705
GSMG0004388	Glt8d2	1.07591	0.86566	0.948986	chr10:82650433-82690652	glycosyltransferase 8 domain containing 2	ENSMUSG00000020251	56.8575	52.8809
GSMG0004389	Nfyb	1.14305	0.276315	0.706334	chr10:82748700-82764144	nuclear transcription factor-Y beta	ENSMUSG00000020248	1082.81	947.037
GSMG0004394	Slc41a2	1.13573	0.241187	0.672102	chr10:83230849-83337818	solute carrier family 41, member 2	ENSMUSG00000034591	698.828	615.593
GSMG0004397	Appl2	-1.17638	0.170611	0.565332	chr10:83600036-83648689	adaptor protein, phosphotyrosine interaction, PH domain and leucine zipper containing 2	ENSMUSG00000020263	700.812	824.159
GSMG0004400	Nuak1	-1.11864	0.234069	0.665275	chr10:84370900-84440668	NUAK family, SNF1-like kinase, 1	ENSMUSG00000020032	3407.42	3811.13
GSMG0004402	Ckap4	-1.02616	0.644479	0.905642	chr10:84526305-84534036	cytoskeleton-associated protein 4	ENSMUSG00000046841	3423.96	3513.47
GSMG0004407	Mterf2	1.23797	0.00313723	0.0532561	chr10:85119435-85128027	mitochondrial transcription termination factor 2	ENSMUSG00000049038	1687.06	1363.06
GSMG0004408	Cry1	1.17196	0.0960519	0.410458	chr10:85131702-85185065	cryptochrome 1 (photolyase-like)	ENSMUSG00000020038	1413.19	1205.34
GSMG0004412	Prdm4	-1.07451	0.511056	0.845039	chr10:85891970-85917143	PR domain containing 4	---	1438.29	1544.71
GSMG0004413	Rtcb	1.19652	0.0360956	0.230465	chr10:85938635-85957793	RNA 2',3'-cyclic phosphate and 5'-OH ligase	ENSMUSG00000001783	14779.6	12352.2
GSMG0004418	Syn3	-1.59599	0.0571642	0.301078	chr10:86048748-86498898	synapsin III	---	135.639	216.013
GSMG0004421	Hsp90b1	-1.07383	0.449217	0.834525	chr10:86690209-86705510	heat shock protein 90, beta (Grp94), member 1	ENSMUSG00000020048	20802.3	22337.4
GSMG0004423	Ascl1	1.94637	0.00189593	0.0394916	chr10:87490819-87493661	achaete-scute family bHLH transcription factor 1	ENSMUSG00000020052	185.059	94.7347
GSMG0004431	Gm40733	1.40255	0.00962081	0.104071	chr10:88367049-88380050	predicted gene, 40733	---	577.321	411.942
GSMG0004433	Chpt1	-1.09657	0.454982	0.838287	chr10:88472809-88503970	choline phosphotransferase 1	---	407.263	447.083
GSMG0004441	Ano4	-1.13916	0.587695	0.894797	chr10:88948995-89257790	anoctamin 4	---	48.8174	55.5231
GSMG0004448	Scyl2	1.03039	0.775349	0.924813	chr10:89638721-89686294	SCY1-like 2 (S. cerevisiae)	---	2185.81	2120.92
GSMG0004449	Actr6	1.3309	0.00386534	0.0599051	chr10:89711968-89732297	ARP6 actin-related protein 6	ENSMUSG00000019948	1582.97	1189.02
GSMG0004452	Apaf1	-1.08372	0.70715	0.905642	chr10:90989311-91082770	apoptotic peptidase activating factor 1	---	79.0156	85.5756
GSMG0004454	Slc25a3	1.24403	0.0390004	0.241467	chr10:91115471-91124026	solute carrier family 25 (mitochondrial carrier, phosphate carrier), member 3	---	44987.3	36162.7
GSMG0004458	Tmpo	-1.07945	0.36117	0.782275	chr10:91147571-91171619	thymopoietin	---	752.84	812.455
GSMG0004477	Metap2	-1.01824	0.81088	0.941848	chr10:93858489-93897096	methionine aminopeptidase 2	---	3384.94	3446.41
GSMG0004485	Cep83os	-1.00844	0.945828	0.98234	chr10:94671025-94688621	centrosomal protein 83, opposite strand	---	2317.94	2338.21
GSMG0004486	Plxnc1	-1.50241	0.06848	0.335859	chr10:94790866-94944845	plexin C1	ENSMUSG00000074785	744.097	1117.74
GSMG0004491	Cradd	1.21944	0.0253737	0.187592	chr10:95174742-95324137	CASP2 and RIPK1 domain containing adaptor with death domain	---	892.933	732.278
GSMG0004498	---	-11.1262	0.104727	0.431967	chr10:95542589-95543005	---	---	2.07833	23.1145
GSMG0004499	Nudt4	1.06207	0.466633	0.845039	chr10:95547007-95564148	nudix (nucleoside diphosphate linked moiety X)-type motif 4	ENSMUSG00000020029	14174.8	13346.1
GSMG0004518	Tmtc3	-1.20481	0.194872	0.605575	chr10:100443902-100487348	transmembrane and tetratricopeptide repeat containing 3	---	322.35	387.977
GSMG0004519	4930430F08Rik	1.24658	0.0458835	0.266386	chr10:100572274-100590424	RIKEN cDNA 4930430F08 gene	ENSMUSG00000046567	795.517	637.712
GSMG0004520	Gm35722	24.5756	1.18578e-11	2.87816e-08	chr10:100707535-100741637	predicted gene, 35722	ENSMUSG00000112104	315.886	12.8589
GSMG0004523	Nts	1.41962	0.00665361	0.0833386	chr10:102481758-102490435	neurotensin	ENSMUSG00000019890	1179.22	830.445
GSMG0004529	Tmtc2	-1.33671	0.040584	0.247663	chr10:105187666-105574479	transmembrane and tetratricopeptide repeat containing 2	ENSMUSG00000036019	933.15	1247.52
GSMG0004542	Mettl25	1.03223	0.789564	0.929175	chr10:105763185-105841381	methyltransferase like 25	---	601.869	583.261
GSMG0004558	Syt1	-1.21316	0.158961	0.546758	chr10:108497651-109010975	synaptotagmin I	---	45558.7	55270
GSMG0004597	Zdhhc17	1.08533	0.351524	0.776652	chr10:110941590-111010140	zinc finger, DHHC domain containing 17	ENSMUSG00000035798	853.486	786.528
GSMG0004603	Atxn7l3b	1.08728	0.395015	0.793776	chr10:112921461-112929026	ataxin 7-like 3B	ENSMUSG00000074748	33901.9	31180.8
GSMG0004604	Trhde	1.22686	0.100426	0.422169	chr10:114398820-114909730	TRH-degrading enzyme	ENSMUSG00000050663	2444.17	1992.31
GSMG0004610	Tbc1d15	1.14351	0.165156	0.55784	chr10:115197871-115251493	TBC1 domain family, member 15	ENSMUSG00000020130	624.558	545.882
GSMG0004611	---	1.07157	0.517682	0.845039	chr10:115288064-115289288	---	---	2936.37	2740.13
GSMG0004612	Rab21	1.19701	0.0453277	0.264327	chr10:115289371-115315594	RAB21, member RAS oncogene family	ENSMUSG00000020132	8705.48	7272.34
GSMG0004613	Tmem19	1.14735	0.172767	0.569627	chr10:115339674-115362501	transmembrane protein 19	---	1372.16	1196.43
GSMG0004615	Thap2	-1.04923	0.678469	0.905642	chr10:115368398-115385793	THAP domain containing, apoptosis associated protein 2	ENSMUSG00000020137	790.475	828.59
GSMG0004620	Kcnmb4	1.24258	0.151666	0.531623	chr10:116417868-116473883	potassium large conductance calcium-activated channel, subfamily M, beta member 4	ENSMUSG00000054934	2610.43	2100.83
GSMG0004621	Cnot2	1.06521	0.438636	0.8272	chr10:116485160-116581511	CCR4-NOT transcription complex, subunit 2	---	3336.6	3131.82
GSMG0004628	Rab3ip	1.1486	0.139287	0.507688	chr10:116905781-116950453	RAB3A interacting protein	---	1802.92	1569.74
GSMG0004629	Cct2	1.22899	0.0174485	0.149667	chr10:117050999-117063852	chaperonin containing Tcp1, subunit 2 (beta)	ENSMUSG00000034024	22564.3	18359.8
GSMG0004630	Frs2	-1.03401	0.691833	0.905642	chr10:117069427-117148534	fibroblast growth factor receptor substrate 2	ENSMUSG00000020170	4296.45	4442.06
GSMG0004634	Yeats4	1.30288	0.00191498	0.039623	chr10:117215142-117224508	YEATS domain containing 4	ENSMUSG00000020171	7177.84	5509.37
GSMG0004640	Cpsf6	1.02934	0.726105	0.905642	chr10:117344036-117376974	cleavage and polyadenylation specific factor 6	---	4819.11	4682.06
GSMG0004642	Mdm2	1.2077	0.108399	0.440321	chr10:117688876-117710758	transformed mouse 3T3 cell double minute 2	ENSMUSG00000020184	935.068	773.528
GSMG0004643	Slc35e3	1.06855	0.351529	0.776652	chr10:117733482-117746370	solute carrier family 35, member E3	ENSMUSG00000060181	2935.97	2747.91
GSMG0004644	Nup107	1.04247	0.597204	0.901035	chr10:117750622-117792706	nucleoporin 107	ENSMUSG00000052798	936.1	897.614
GSMG0004645	Rap1b	1.25261	0.0467022	0.268891	chr10:117814471-117846039	RAS related protein 1b	ENSMUSG00000052681	1576.68	1258.53
GSMG0004653	Dyrk2	-1.17384	0.135085	0.498244	chr10:118858084-118869149	dual-specificity tyrosine-(Y)-phosphorylation regulated kinase 2	ENSMUSG00000028630	1364.83	1601.51
GSMG0004659	Cand1	-1.00337	0.972254	0.99042	chr10:119198812-119240055	cullin associated and neddylation disassociated 1	ENSMUSG00000020114	14844	14894.2
GSMG0004667	Helb	-1.34211	0.174606	0.572357	chr10:120083608-120112987	helicase (DNA) B	ENSMUSG00000020228	42.3787	56.8748
GSMG0004677	Msrb3	-1.04085	0.796799	0.933625	chr10:120781105-120898971	methionine sulfoxide reductase B3	ENSMUSG00000051236	445.373	463.066
GSMG0004680	Lemd3	-1.01887	0.849194	0.948986	chr10:120923418-120979330	LEM domain containing 3	ENSMUSG00000048661	3503.21	3568.59
GSMG0004686	Tbc1d30	-1.18	0.192556	0.601457	chr10:121263822-121351644	TBC1 domain family, member 30	ENSMUSG00000052302	1842.75	2174.51
GSMG0004687	Rassf3	-1.17363	0.0359764	0.230013	chr10:121410350-121476305	Ras association (RalGDS/AF-6) domain family member 3	ENSMUSG00000025795	1293.07	1517.29
GSMG0004689	Tbk1	1.085	0.387115	0.793776	chr10:121546455-121586794	TANK-binding kinase 1	ENSMUSG00000020115	2204.75	2031.4
GSMG0004696	Srgap1	-1.61565	0.00559407	0.0742909	chr10:121780991-122047317	SLIT-ROBO Rho GTPase activating protein 1	---	712.857	1151.83
GSMG0004700	Rxylt1	1.39477	0.000161765	0.00897705	chr10:122078114-122097171	ribitol xylosyltransferase 1	ENSMUSG00000034620	3453.17	2475.39
GSMG0004707	Mon2	-1.3052	0.0137628	0.129788	chr10:122992061-123076505	MON2 homolog, regulator of endosome to Golgi trafficking	---	1085.36	1416.24
GSMG0004710	Usp15	-1.03463	0.780661	0.926444	chr10:123105008-123197019	ubiquitin specific peptidase 15	---	3038.14	3142.81
GSMG0004717	Slc16a7	-1.05591	0.701697	0.905642	chr10:125219270-125328963	solute carrier family 16 (monocarboxylic acid transporters), member 7	---	229.109	242.055
GSMG0004725	Atp23	1.262	0.0121542	0.120601	chr10:126868430-126901371	ATP23 metallopeptidase and ATP synthase assembly factor homolog	---	890.927	705.709
GSMG0004728	Tsfm	1.25184	0.0110809	0.113818	chr10:127022332-127032839	Ts translation elongation factor, mitochondrial	ENSMUSG00000040521	1794.01	1432.96
GSMG0004729	Marchf9	-1.10197	0.317987	0.750602	chr10:127056050-127060186	membrane associated ring-CH-type finger 9	ENSMUSG00000040502	2312.21	2548.63
GSMG0004730	Tspan31	1.30579	0.00686809	0.0843908	chr10:127067280-127070274	tetraspanin 31	ENSMUSG00000006736	9794.6	7500.95
GSMG0004732	Os9	-1.10566	0.262541	0.696211	chr10:127093643-127121160	amplified in osteosarcoma	---	9664.7	10686.2
GSMG0004735	Arhgef25	1.13665	0.270845	0.705456	chr10:127182521-127190083	Rho guanine nucleotide exchange factor (GEF) 25	---	7241.9	6371.21
GSMG0004736	Dtx3	-1.00231	0.976557	0.990662	chr10:127190373-127195728	deltex 3, E3 ubiquitin ligase	---	21587.5	21637.2
GSMG0004737	Pip4k2c	1.04735	0.519002	0.845039	chr10:127197067-127211622	phosphatidylinositol-5-phosphate 4-kinase, type II, gamma	ENSMUSG00000025417	30093.2	28732.2
GSMG0004738	Kif5a	-1.96304	0.0136733	0.129439	chr10:127225696-127263364	kinesin family member 5A	---	1964.1	3855.94
GSMG0004740	Mbd6	-1.41541	0.104619	0.431852	chr10:127281956-127289018	methyl-CpG binding domain protein 6	---	68.4928	96.8746
GSMG0004742	Mars1	1.07736	0.304395	0.738747	chr10:127296221-127311786	methionine-tRNA synthetase 1	---	4639.81	4306.58
GSMG0004746	Shmt2	-1.04351	0.66663	0.905642	chr10:127517123-127522446	serine hydroxymethyltransferase 2 (mitochondrial)	---	2037.72	2126.92
GSMG0004747	Nxph4	1.3165	0.0217691	0.171194	chr10:127525473-127534560	neurexophilin 4	ENSMUSG00000040258	19251.8	14623.6
GSMG0004748	Lrp1	-1.82588	0.000549906	0.0187784	chr10:127538194-127621149	low density lipoprotein receptor-related protein 1	ENSMUSG00000040249	319.142	583.456
GSMG0004750	Nab2	1.03112	0.823229	0.944886	chr10:127660919-127666703	Ngfi-A binding protein 2	---	1304.45	1264.2
GSMG0004756	Rbms2	1.14401	0.354874	0.77955	chr10:128129470-128180299	RNA binding motif, single stranded interacting protein 2	---	276.393	241.008
GSMG0004758	Spryd4	1.41829	0.000336085	0.013666	chr10:128209908-128211809	SPRY domain containing 4	ENSMUSG00000051346	1784.69	1258.03
GSMG0004765	Coq10a	1.08406	0.236611	0.668394	chr10:128363097-128370037	coenzyme Q10A	---	5099.92	4704.54
GSMG0004767	Nabp2	-1.00962	0.922874	0.971489	chr10:128401395-128410551	nucleic acid binding protein 2	---	4370.62	4412.91
GSMG0004768	Myl6	1.45096	0.000519667	0.0181993	chr10:128490859-128493901	myosin, light polypeptide 6, alkali, smooth muscle and non-muscle	---	52781.4	36376.7
GSMG0004769	Myl6b	1.30135	0.00942473	0.102796	chr10:128494157-128498685	myosin, light polypeptide 6B	ENSMUSG00000039824	3659.14	2811.74
GSMG0004770	Esyt1	-2.36416	0.000921071	0.0256744	chr10:128509965-128525872	extended synaptotagmin-like protein 1	ENSMUSG00000025366	31.3399	74.3916
GSMG0004771	Zc3h10	1.02105	0.792161	0.930619	chr10:128541963-128547776	zinc finger CCCH type containing 10	ENSMUSG00000039810	2459.6	2408.38
GSMG0004772	Rpl41	1.49787	0.00270441	0.0488746	chr10:128548110-128549168	ribosomal protein L41	ENSMUSG00000093674	37019.3	24714.6
GSMG0004773	Pa2g4	1.07354	0.272768	0.706043	chr10:128557766-128566012	proliferation-associated 2G4	ENSMUSG00000025364	5089.02	4740.85
GSMG0004775	Rps26	1.45214	0.00271474	0.048956	chr10:128624529-128626506	ribosomal protein S26	ENSMUSG00000025362	12535.5	8632.38
GSMG0004776	Ikzf4	-1.41514	0.0266764	0.193683	chr10:128630843-128645993	IKAROS family zinc finger 4	---	226.726	321.208
GSMG0004778	Suox	1.13097	0.187959	0.595109	chr10:128669887-128673918	sulfite oxidase	ENSMUSG00000049858	1713.91	1515.61
GSMG0004779	Rab5b	1.20795	0.0626035	0.318424	chr10:128677179-128696268	RAB5B, member RAS oncogene family	ENSMUSG00000000711	29279.3	24239.1
GSMG0004781	Dgka	1.02229	0.851689	0.948986	chr10:128720134-128745084	diacylglycerol kinase, alpha	---	379.029	371.231
GSMG0004782	Tmem198b	1.75296	0.0111372	0.114246	chr10:128789429-128804447	transmembrane protein 198b	ENSMUSG00000047090	140.19	79.7464
GSMG0004783	Ormdl2	1.50238	0.00899214	0.0995223	chr10:128817902-128821629	ORM1-like 2 (S. cerevisiae)	---	269.384	179.091
GSMG0004786	Gdf11	-1.27303	0.0581677	0.304397	chr10:128880524-128891718	growth differentiation factor 11	ENSMUSG00000025352	5293.83	6739.56
GSMG0004788	Bloc1s1	1.46469	1.67837e-05	0.00220543	chr10:128919914-128923525	biogenesis of lysosomal organelles complex-1, subunit 1	ENSMUSG00000090247	7458.98	5092.42
GSMG0004809	Eif4enif1	-1.20431	0.0163126	0.143698	chr11:3202353-3244587	eukaryotic translation initiation factor 4E nuclear import factor 1	---	2637.96	3176.42
GSMG0004815	Pik3ip1	-1.15442	0.192764	0.601869	chr11:3330401-3342970	phosphoinositide-3-kinase interacting protein 1	ENSMUSG00000034614	745.657	861.798
GSMG0004816	8430429K09Rik	-1.21626	0.18969	0.597473	chr11:3452437-3479831	RIKEN cDNA 8430429K09 gene	---	475.039	577.599
GSMG0004820	Selenom	1.33755	0.00959497	0.103898	chr11:3514683-3517350	selenoprotein M	ENSMUSG00000075702	51190.7	38272
GSMG0004823	Morc2a	-1.29779	0.0481623	0.273665	chr11:3649437-3690477	microrchidia 2A	---	974.913	1265.79
GSMG0004825	Dusp18	-1.14558	0.331484	0.752059	chr11:3895240-3901296	dual specificity phosphatase 18	ENSMUSG00000047205	852.509	976.904
GSMG0004826	Pes1	-1.07014	0.443743	0.831321	chr11:3963975-3980004	pescadillo ribosomal biogenesis factor 1	ENSMUSG00000020430	1203.81	1289.04
GSMG0004827	Gal3st1	1.40306	0.0120616	0.12025	chr11:3983636-3999328	galactose-3-O-sulfotransferase 1	---	447.667	319.355
GSMG0004832	Rnf215	-1.21742	0.127895	0.482763	chr11:4135160-4142363	ring finger protein 215	ENSMUSG00000003581	487.724	594.325
GSMG0004833	Sf3a1	-1.00714	0.943506	0.981421	chr11:4160353-4183590	splicing factor 3a, subunit 1	ENSMUSG00000002129	6997.01	7047
GSMG0004834	Tbc1d10a	1.0834	0.445985	0.833168	chr11:4186820-4217400	TBC1 domain family, member 10a	ENSMUSG00000034412	1780.36	1643.32
GSMG0004840	Ascc2	-1.36034	0.0793496	0.365945	chr11:4637745-4686658	activating signal cointegrator 1 complex subunit 2	ENSMUSG00000020412	425.631	579.201
GSMG0004841	Zmat5	1.26131	0.0212774	0.168267	chr11:4704656-4737668	zinc finger, matrin type 5	ENSMUSG00000009076	2111.14	1673.93
GSMG0004845	Nipsnap1	1.13904	0.0616796	0.315435	chr11:4873951-4894200	nipsnap homolog 1	ENSMUSG00000034285	6094.31	5351.17
GSMG0004847	Thoc5	1.09374	0.155798	0.54035	chr11:4895340-4928866	THO complex 5	ENSMUSG00000034274	4043.74	3697.06
GSMG0004848	Ap1b1	-1.1411	0.195723	0.606724	chr11:4947519-5042793	adaptor protein complex AP-1, beta 1 subunit	---	13011.6	14847.7
GSMG0004850	Rasl10a	-1.11612	0.895749	0.957306	chr11:5058126-5060385	RAS-like, family 10, member A	ENSMUSG00000034209	503.64	562.138
GSMG0004851	Rhbdd3	1.26375	0.0570468	0.300661	chr11:5099273-5106100	rhomboid domain containing 3	---	1415.37	1120.38
GSMG0004852	Xbp1	1.68687	7.15005e-07	0.000247926	chr11:5520641-5525992	X-box binding protein 1	---	18039.4	10694
GSMG0004855	Ube2d-ps	1.10585	0.334264	0.755489	chr11:5762127-5784710	ubiquitin-conjugating enzyme E2D, pseudogene	ENSMUSG00000083844	1628.59	1472.38
GSMG0004856	Dbnl	-1.03893	0.64738	0.905642	chr11:5788483-5800980	drebrin-like	---	8772.17	9114.22
GSMG0004858	Aebp1	-2.25285	1.23429e-06	0.00038183	chr11:5861866-5872248	AE binding protein 1	ENSMUSG00000020473	114.739	257.916
GSMG0004860	Ykt6	1.05628	0.503143	0.845039	chr11:5955758-5967778	YKT6 v-SNARE homolog (S. cerevisiae)	ENSMUSG00000002741	11135.6	10542.5
GSMG0004861	---	-1.92142	0.375476	0.793776	chr11:6006262-6008330	---	---	849.97	1633.2
GSMG0004863	Ogdh	1.04883	0.611866	0.905642	chr11:6291596-6359093	oxoglutarate (alpha-ketoglutarate) dehydrogenase (lipoamide)	---	48490.3	46232.4
GSMG0004865	Zmiz2	-1.2096	0.0220635	0.172412	chr11:6395125-6407166	zinc finger, MIZ-type containing 2	---	5181.57	6268.19
GSMG0004867	---	-1.28601	0.63596	0.905642	chr11:6475030-6475424	---	---	14.6624	18.9872
GSMG0004868	Ccm2	1.22881	0.039471	0.243281	chr11:6546887-6596761	cerebral cavernous malformation 2	---	3770.06	3067.99
GSMG0004874	Adcy1	-2.3206	0.00117537	0.0298207	chr11:7063433-7178506	adenylate cyclase 1	ENSMUSG00000020431	76.085	176.628
GSMG0004878	Gm11992	-1.41454	0.480216	0.845039	chr11:9048590-9069354	predicted gene 11992	ENSMUSG00000040978	192.508	272.44
GSMG0004879	Upp1	1.93977	0.047478	0.271448	chr11:9118008-9136169	uridine phosphorylase 1	---	61.3742	31.7825
GSMG0004883	Vwc2	1.11863	0.575973	0.885289	chr11:11114014-11267723	von Willebrand factor C domain containing 2	ENSMUSG00000050830	74.0484	66.1558
GSMG0004898	Vstm2a	1.34503	0.00454062	0.0655699	chr11:16257723-16427312	V-set and transmembrane domain containing 2A	---	5146.21	3826.03
GSMG0004905	Cnrip1	1.18389	0.00929817	0.10205	chr11:17051583-17079372	cannabinoid receptor interacting protein 1	ENSMUSG00000044629	32208.4	27205.2
GSMG0004907	C1d	1.43492	0.00588281	0.0771834	chr11:17257547-17269176	C1D nuclear receptor co-repressor	---	8824.02	6149.56
GSMG0004916	Spred2	1.12494	0.371033	0.791181	chr11:19924372-20024025	sprouty-related EVH1 domain containing 2	ENSMUSG00000045671	3730.78	3315.84
GSMG0004920	Rab1a	1.16892	0.0927626	0.401568	chr11:20201412-20226855	RAB1A, member RAS oncogene family	ENSMUSG00000020149	41580.4	35571.5
GSMG0004922	Sertad2	-1.08321	0.260438	0.693607	chr11:20543162-20653023	SERTA domain containing 2	---	1627.75	1762.69
GSMG0004925	Peli1	1.30581	0.0375436	0.235699	chr11:21091290-21150326	pellino 1	ENSMUSG00000020134	922.308	705.835
GSMG0004930	Vps54	-1.32882	0.0631167	0.32	chr11:21239032-21321136	VPS54 GARP complex subunit	---	273.786	363.442
GSMG0004934	Wdpcp	1.12972	0.497812	0.845039	chr11:21572279-21898686	WD repeat containing planar cell polarity effector	ENSMUSG00000020319	262.731	232.621
GSMG0004938	Tmem17	1.35469	0.104776	0.4321	chr11:22512268-22519231	transmembrane protein 17	ENSMUSG00000049904	137.025	101.245
GSMG0004941	---	-1.39125	0.188104	0.595196	chr11:22860359-22861256	---	---	48.8492	68.0333
GSMG0004942	Zrsr1	-1.3137	0.0175928	0.150246	chr11:22972005-22976497	zinc finger (CCCH type), RNA binding motif and serine/arginine rich 1	ENSMUSG00000044068	6269.66	8236.54
GSMG0004945	Cct4	1.32905	0.00520049	0.0709296	chr11:22990593-23003337	chaperonin containing Tcp1, subunit 4 (delta)	ENSMUSG00000007739	16376.9	12322.2
GSMG0004946	---	1.04801	0.683963	0.905642	chr11:23003685-23004437	---	---	244.517	233.04
GSMG0004947	Fam161a	-1.16365	0.47152	0.845039	chr11:23007529-23030788	family with sequence similarity 161, member A	---	68.3447	79.669
GSMG0004950	Xpo1	-1.04982	0.692512	0.905642	chr11:23256041-23298249	exportin 1	---	1040.72	1092.38
GSMG0004959	Pus10	-1.01276	0.927434	0.973194	chr11:23665673-23732876	pseudouridylate synthase 10	---	199.442	201.7
GSMG0004963	Bcl11a	1.1844	0.0147213	0.134838	chr11:24078055-24173558	B cell CLL/lymphoma 11A (zinc finger protein)	---	5515.21	4656.33
GSMG0004970	Fancl	1.11478	0.427218	0.817127	chr11:26387084-26471882	Fanconi anemia, complementation group L	---	460.076	412.972
GSMG0004975	Efemp1	-1.39468	0.172399	0.569004	chr11:28853203-28926743	epidermal growth factor-containing fibulin-like extracellular matrix protein 1	ENSMUSG00000020467	72.3722	100.962
GSMG0004976	Pnpt1	1.23365	0.0124051	0.121941	chr11:29130744-29162528	polyribonucleotide nucleotidyltransferase 1	ENSMUSG00000020464	1002.46	812.407
GSMG0004977	Ppp4r3b	-1.26127	0.0862448	0.384461	chr11:29172932-29220797	protein phosphatase 4 regulatory subunit 3B	---	906.51	1142.76
GSMG0004982	Ccdc88a	-2.22412	0.00656314	0.082738	chr11:29373658-29511522	coiled coil domain containing 88A	---	904.931	2012.54
GSMG0004983	Mtif2	-1.00754	0.936577	0.978217	chr11:29526397-29545445	mitochondrial translational initiation factor 2	---	1321.61	1331.12
GSMG0004986	Rtn4	1.1302	0.21148	0.632194	chr11:29692898-29744414	reticulon 4	---	29215.8	25849.8
GSMG0004994	Psme4	-1.14878	0.342939	0.766637	chr11:30771775-30880353	proteasome (prosome, macropain) activator subunit 4	ENSMUSG00000040850	276.547	317.297
GSMG0004995	Gpr75	1.88814	2.6612e-11	5.5981e-08	chr11:30885357-30893723	G protein-coupled receptor 75	ENSMUSG00000043999	745.949	395.184
GSMG0004996	Asb3	1.01581	0.872407	0.948986	chr11:30954398-31102704	ankyrin repeat and SOCS box-containing 3	---	1033.18	1016.89
GSMG0004997	---	-1.21072	0.208932	0.62787	chr11:31103233-31105355	---	---	203.725	246.607
GSMG0005001	Cpeb4	-1.22038	0.0612413	0.314417	chr11:31870878-31935634	cytoplasmic polyadenylation element binding protein 4	---	535.965	653.746
GSMG0005004	Nsg2	1.15033	0.0935623	0.404088	chr11:32000419-32059211	neuron specific gene family member 2	---	86842.3	75493.7
GSMG0005005	Snrnp25	1.61237	0.00015678	0.00884979	chr11:32205414-32209000	small nuclear ribonucleoprotein 25 (U11/U12)	ENSMUSG00000040767	5814.1	3605.9
GSMG0005006	Mpg	1.23088	0.0806063	0.369312	chr11:32226503-32232702	N-methylpurine-DNA glycosylase	ENSMUSG00000020287	1582.28	1285.59
GSMG0005012	Sh3pxd2b	-1.31244	0.169576	0.564191	chr11:32347818-32428189	SH3 and PX domains 2B	---	244.709	321.274
GSMG0005014	Ubtd2	1.10939	0.325855	0.750602	chr11:32455370-32520052	ubiquitin domain containing 2	ENSMUSG00000044949	1530.22	1379.21
GSMG0005019	Fbxw11	-1.0326	0.710177	0.905642	chr11:32642555-32746816	F-box and WD-40 domain protein 11	---	2224.13	2296.12
GSMG0005032	Insyn2b	-1.1359	0.40367	0.793776	chr11:34314822-34422640	inhibitory synaptic factor family member 2B	ENSMUSG00000069911	2607.68	2961.66
GSMG0005034	Slit3	-1.86714	0.00789432	0.0919295	chr11:35121456-35712029	slit guidance ligand 3	ENSMUSG00000056427	334.926	625.433
GSMG0005042	Pank3	-1.08496	0.381749	0.793776	chr11:35769484-35791285	pantothenate kinase 3	ENSMUSG00000018846	892.961	968.854
GSMG0005050	Nudcd2	1.2847	0.0381894	0.238195	chr11:40733656-40740044	NudC domain containing 2	---	1225.18	953.886
GSMG0005055	Gabrb2	-1.21549	0.215419	0.637231	chr11:42419707-42632591	gamma-aminobutyric acid (GABA) A receptor, subunit beta 2	---	7165.84	8709.6
GSMG0005064	Slu7	-1.20459	0.142269	0.513692	chr11:43433731-43450984	SLU7 splicing factor homolog (S. cerevisiae)	---	2209.37	2661.32
GSMG0005069	Pwwp2a	-1.24647	0.248593	0.681198	chr11:43681998-43722605	PWWP domain containing 2A	---	230.187	286.512
GSMG0005074	Rnf145	-1.01672	0.861105	0.948986	chr11:44518956-44565520	ring finger protein 145	---	4665.28	4743.2
GSMG0005077	Ebf1	-1.51173	0.0789636	0.364965	chr11:44618129-45008096	early B cell factor 1	---	165.068	249.754
GSMG0005092	Clint1	1.07904	0.274613	0.706334	chr11:45851962-45910625	clathrin interactor 1	---	2759.23	2556.98
GSMG0005094	Adam19	-1.48008	0.00713923	0.0864433	chr11:46054501-46147347	a disintegrin and metallopeptidase domain 19 (meltrin beta)	ENSMUSG00000011256	1087.19	1609.14
GSMG0005095	Fndc9	1.09005	0.722137	0.905642	chr11:46235556-46239871	fibronectin type III domain containing 9	ENSMUSG00000048721	116.296	106.584
GSMG0005097	Med7	1.31913	0.0164778	0.144669	chr11:46436947-46442721	mediator complex subunit 7	---	2101.36	1592.99
GSMG0005106	Rack1	1.32904	0.0181114	0.153158	chr11:48800327-48806434	receptor for activated C kinase 1	ENSMUSG00000020372	22310.9	16787.2
GSMG0005110	Zfp62	-1.10793	0.611806	0.905642	chr11:49178061-49218815	zinc finger protein 62	---	358.961	397.06
GSMG0005111	Mgat1	1.33618	0.0300792	0.207362	chr11:49244191-49263023	mannoside acetylglucosaminyltransferase 1	---	282.07	210.893
GSMG0005127	Gfpt2	-1.33892	0.061063	0.313886	chr11:49794155-49838620	glutamine fructose-6-phosphate transaminase 2	ENSMUSG00000020363	211.149	282.919
GSMG0005128	Mapk9	-1.11085	0.239237	0.670176	chr11:49846751-49886421	mitogen-activated protein kinase 9	---	4584.23	5092.26
GSMG0005130	Rasgef1c	-1.25342	0.0129078	0.12481	chr11:49901832-49980994	RasGEF domain family, member 1C	---	4119.67	5163.64
GSMG0005131	Rnf130	-1.14611	0.189649	0.597401	chr11:50025331-50125719	ring finger protein 130	---	1414.66	1621.3
GSMG0005134	Tbc1d9b	-1.31278	0.0240534	0.181295	chr11:50131360-50172783	TBC1 domain family, member 9B	---	15125.1	19856.3
GSMG0005135	Mrnip	-1.08034	0.373454	0.792915	chr11:50174441-50201307	MRN complex interacting protein	ENSMUSG00000020381	1542.75	1667.09
GSMG0005137	Mgat4b	-1.12257	0.267205	0.701606	chr11:50225333-50235103	mannoside acetylglucosaminyltransferase 4, isoenzyme B	ENSMUSG00000036620	2239.58	2514.08
GSMG0005142	Hnrnph1	1.17278	0.0573363	0.301577	chr11:50376990-50386528	heterogeneous nuclear ribonucleoprotein H1	---	14616.6	12463.1
GSMG0005143	Adamts2	-1.71195	0.00931773	0.102198	chr11:50602085-50807573	a disintegrin-like and metallopeptidase (reprolysin type) with thrombospondin type 1 motif, 2	ENSMUSG00000036545	95.1078	163.446
GSMG0005153	Zfp354a	-1.05072	0.729879	0.905642	chr11:51059225-51072799	zinc finger protein 354A	---	339.177	356.031
GSMG0005155	Clk4	1.00718	0.96344	0.99042	chr11:51263114-51281770	CDC like kinase 4	---	361.694	358.436
GSMG0005156	Col23a1	-1.56617	0.00439847	0.064106	chr11:51289920-51583901	collagen, type XXIII, alpha 1	ENSMUSG00000063564	596.555	934.5
GSMG0005161	Phykpl	1.04486	0.817456	0.944886	chr11:51584756-51604489	5-phosphohydroxy-L-lysine phospholyase	---	101.877	97.5307
GSMG0005163	Nhp2	1.34893	0.0160805	0.142773	chr11:51619748-51623718	NHP2 ribonucleoprotein	ENSMUSG00000001056	5210.69	3862.9
GSMG0005166	Sar1b	1.32547	0.00437045	0.0638745	chr11:51763663-51791953	secretion associated Ras related GTPase 1B	ENSMUSG00000020386	7404.91	5586.85
GSMG0005168	Cdkn2aipnl	1.21339	0.0822541	0.373661	chr11:51967631-51977334	CDKN2A interacting protein N-terminal like	ENSMUSG00000020392	4199.42	3461
GSMG0005170	Cdkl3	1.06284	0.564286	0.877118	chr11:52004219-52089778	cyclin-dependent kinase-like 3	---	320.317	301.095
GSMG0005171	Ppp2ca	1.18433	0.0193975	0.159186	chr11:52098823-52122749	protein phosphatase 2 (formerly 2A), catalytic subunit, alpha isoform	ENSMUSG00000020349	35825.7	30249.7
GSMG0005172	9530068E07Rik	1.18236	0.0517478	0.284419	chr11:52396426-52408725	RIKEN cDNA 9530068E07 gene	ENSMUSG00000036275	2598.29	2197.83
GSMG0005173	---	-1.16963	0.134511	0.497214	chr11:52124530-52127779	---	---	2506	2930.69
GSMG0005174	Skp1	1.3258	0.0194878	0.159488	chr11:52231995-52246858	S-phase kinase-associated protein 1	ENSMUSG00000036309	75470.8	56924.8
GSMG0005176	Vdac1	1.08954	0.222752	0.649184	chr11:52360851-52389396	voltage-dependent anion channel 1	ENSMUSG00000020402	47877.2	43942.5
GSMG0005178	Fstl4	-1.82044	0.00240334	0.0453288	chr11:52764655-53187347	follistatin-like 4	ENSMUSG00000036264	702.575	1279.8
GSMG0005180	---	-1.85387	0.000800451	0.0237382	chr11:53187638-53188736	---	---	470.901	873.41
GSMG0005181	Zcchc10	1.47001	0.000289106	0.0125481	chr11:53324677-53333321	zinc finger, CCHC domain containing 10	ENSMUSG00000018239	1596.67	1085.81
GSMG0005182	Aff4	-1.47666	0.00201292	0.0409841	chr11:53350767-53421840	AF4/FMR2 family, member 4	ENSMUSG00000049470	13280.3	19610.6
GSMG0005187	---	1.1586	0.432586	0.82135	chr11:53480165-53481097	---	---	73.0949	63.0218
GSMG0005188	Septin8	-1.17626	0.0701619	0.340494	chr11:53519736-53549604	septin 8	---	12619.5	14843.4
GSMG0005189	Kif3a	-1.20638	0.184418	0.589161	chr11:53567369-53604246	kinesin family member 3A	---	4104.71	4951.96
GSMG0005190	Il5	1.74495	0.0203492	0.16428	chr11:53720794-53725103	interleukin 5	ENSMUSG00000036117	146.999	84.453
GSMG0005191	Irf1	1.14478	0.408955	0.799097	chr11:53770014-53778374	interferon regulatory factor 1	---	98.076	85.7779
GSMG0005193	P4ha2	1.32938	0.0225561	0.174984	chr11:54100924-54131667	procollagen-proline, 2-oxoglutarate 4-dioxygenase (proline 4-hydroxylase), alpha II polypeptide	---	376.369	282.802
GSMG0005194	Acsl6	-1.11521	0.242554	0.673288	chr11:54303798-54364756	acyl-CoA synthetase long-chain family member 6	---	5188.64	5786.63
GSMG0005196	Fnip1	-1.00358	0.969512	0.99042	chr11:54438179-54518241	folliculin interacting protein 1	ENSMUSG00000035992	1915.65	1921.92
GSMG0005198	Rapgef6	-1.37227	0.0440007	0.259781	chr11:54522844-54699286	Rap guanine nucleotide exchange factor (GEF) 6	---	644.817	885.013
GSMG0005202	---	-75.5921	9.04202e-05	0.00638281	chr11:54717739-54717927	---	---	0	14.2163
GSMG0005203	---	-62.2181	0.0130595	0.125595	chr11:54718012-54718398	---	---	0.415666	26.0395
GSMG0005208	Hint1	1.38634	0.00156566	0.0351853	chr11:54866383-54870505	histidine triad nucleotide binding protein 1	ENSMUSG00000020267	28988.9	20910.5
GSMG0005209	Gpx3	1.27432	0.0327189	0.218454	chr11:54902854-54910386	glutathione peroxidase 3	---	1772.65	1390.98
GSMG0005211	Gm2a	1.00884	0.918253	0.968919	chr11:55097985-55113029	GM2 ganglioside activator protein	ENSMUSG00000000594	2987.08	2961.5
GSMG0005214	Slc36a1	-1.12378	0.129945	0.487713	chr11:55204340-55236332	solute carrier family 36 (proton/amino acid symporter), member 1	ENSMUSG00000020261	2135.04	2399.76
GSMG0005216	G3bp1	1.099	0.346714	0.771253	chr11:55469685-55500887	GTPase activating protein (SH3 domain) binding protein 1	ENSMUSG00000018583	1652.95	1503.28
GSMG0005217	---	1.0302	0.803236	0.93719	chr11:55501516-55505188	---	---	1867.24	1811.82
GSMG0005219	Gria1	-1.14455	0.269029	0.703426	chr11:57005854-57330243	glutamate receptor, ionotropic, AMPA1 (alpha 1)	---	5488.53	6282.18
GSMG0005222	Mfap3	1.11688	0.354935	0.779592	chr11:57518662-57533817	microfibrillar-associated protein 3	---	1305.15	1168.01
GSMG0005223	Galnt10	-1.78348	0.00311307	0.0530806	chr11:57645442-57787498	polypeptide N-acetylgalactosaminyltransferase 10	ENSMUSG00000020520	78.3876	139.285
GSMG0005227	Sap30l	1.05687	0.601615	0.903924	chr11:57801637-57810615	SAP30-like	ENSMUSG00000020519	979.223	926.324
GSMG0005230	Larp1	-1.9308	6.51081e-06	0.0011807	chr11:58009064-58062034	La ribonucleoprotein domain family, member 1	ENSMUSG00000037331	5664.64	10937.6
GSMG0005231	Cnot8	1.16722	0.0904463	0.395447	chr11:58092794-58118597	CCR4-NOT transcription complex, subunit 8	---	3143.07	2692.93
GSMG0005232	Mrpl22	1.41624	6.06734e-05	0.00476241	chr11:58171660-58179566	mitochondrial ribosomal protein L22	ENSMUSG00000020514	1520.86	1073.48
GSMG0005234	Igtp	1.01783	0.864837	0.948986	chr11:58199555-58207591	interferon gamma induced GTPase	ENSMUSG00000078853	456.884	448.867
GSMG0005238	Zfp692	1.09881	0.453216	0.836604	chr11:58307065-58315144	zinc finger protein 692	---	279.781	254.446
GSMG0005240	Sh3bp5l	1.21985	0.00412503	0.0622639	chr11:58330707-58347728	SH3 binding domain protein 5 like	---	5164.08	4233.6
GSMG0005245	Trim58	-1.16343	0.385644	0.793776	chr11:58640391-58652404	tripartite motif-containing 58	ENSMUSG00000037124	181.784	211.791
GSMG0005252	Gm12258	-1.01632	0.898225	0.958492	chr11:58847162-58861957	predicted gene 12258	---	720.078	732.461
GSMG0005253	2810021J22Rik	-1.23471	0.154114	0.536863	chr11:58867215-58884338	RIKEN cDNA 2810021J22 gene	ENSMUSG00000020491	823.241	1016.32
GSMG0005254	Btnl10	1.11958	0.664486	0.905642	chr11:58917907-58927158	butyrophilin-like 10	---	59.171	52.5885
GSMG0005255	H2bu2	1.30809	0.0146984	0.134707	chr11:58948910-58949532	H2B.U histone 2	ENSMUSG00000056895	3554.61	2717.64
GSMG0005256	Trim17	-1.61931	0.0626491	0.318433	chr11:58963781-58973075	tripartite motif-containing 17	ENSMUSG00000036964	82.554	134.077
GSMG0005258	Trim11	1.02668	0.785193	0.927538	chr11:58978092-58991462	tripartite motif-containing 11	---	1394.32	1357.84
GSMG0005260	Mrpl55	1.29963	0.00659266	0.0829115	chr11:59202486-59206138	mitochondrial ribosomal protein L55	---	5275.27	4059.23
GSMG0005261	2310033P09Rik	-1.05058	0.624742	0.905642	chr11:59208350-59210738	RIKEN cDNA 2310033P09 gene	ENSMUSG00000020441	1009.02	1060.15
GSMG0005262	Wnt9a	-1.04852	0.84952	0.948986	chr11:59306927-59333552	wingless-type MMTV integration site family, member 9A	ENSMUSG00000000126	100.369	105.224
GSMG0005263	Jmjd4	-1.13499	0.171748	0.567528	chr11:59450044-59458567	jumonji domain containing 4	---	713.626	809.876
GSMG0005264	---	-1.9292	0.00424266	0.0631588	chr11:59461495-59462970	---	---	97.9263	188.416
GSMG0005265	4933439C10Rik	1.51526	0.00181074	0.0383761	chr11:59505652-59513647	RIKEN cDNA 4933439C10 gene	ENSMUSG00000072893	287.623	189.826
GSMG0005268	Mprip	-1.64679	0.000372023	0.0145643	chr11:59662487-59781756	myosin phosphatase Rho interacting protein	---	1095.33	1803.45
GSMG0005274	Gm16062	1.40357	0.121056	0.467483	chr11:59810080-59818362	predicted gene 16062	ENSMUSG00000087249	152.559	108.565
GSMG0005275	Nt5m	1.1326	0.142055	0.513117	chr11:59839458-59880968	5',3'-nucleotidase, mitochondrial	ENSMUSG00000032615	6530.53	5766.44
GSMG0005278	Med9	-1.03277	0.681617	0.905642	chr11:59948214-59963306	mediator complex subunit 9	ENSMUSG00000061650	6644.66	6862.85
GSMG0005281	Rai1	-1.66716	0.000194496	0.00999532	chr11:60105013-60199195	retinoic acid induced 1	---	1587.66	2647.52
GSMG0005286	Drc3	-1.09372	0.561589	0.874778	chr11:60353081-60394337	dynein regulatory complex subunit 3	ENSMUSG00000056598	242.871	266.194
GSMG0005288	Gid4	1.02432	0.843684	0.948986	chr11:60417145-60450927	GID complex subunit 4, VID24 homolog	ENSMUSG00000018415	379.012	369.685
GSMG0005289	Drg2	1.0335	0.644078	0.905642	chr11:60454591-60468754	developmentally regulated GTP binding protein 2	ENSMUSG00000020537	4599.79	4450.81
GSMG0005291	Alkbh5	-1.03052	0.712362	0.905642	chr11:60537683-60558512	alkB homolog 5, RNA demethylase	ENSMUSG00000042650	5286.89	5447.83
GSMG0005293	Llgl1	-1.17134	0.113003	0.450131	chr11:60699700-60714330	LLGL1 scribble cell polarity complex component	---	619.564	725.8
GSMG0005294	Mief2	1.18704	0.0788608	0.364634	chr11:60728398-60732951	mitochondrial elongation factor 2	ENSMUSG00000018599	1905.24	1605.63
GSMG0005295	Smcr8	-1.21307	0.0599347	0.310388	chr11:60777525-60788287	Smith-Magenis syndrome chromosome region, candidate 8 homolog (human)	---	1863.01	2259.94
GSMG0005297	Dhrs7b	1.35635	0.00896487	0.099404	chr11:60830631-60858423	dehydrogenase/reductase (SDR family) member 7B	---	2209.05	1628.69
GSMG0005300	Map2k3	-1.05918	0.799495	0.935141	chr11:60932053-60952811	mitogen-activated protein kinase kinase 3	---	102.989	109.417
GSMG0005301	Kcnj12	1.01719	0.918442	0.968999	chr11:61022562-61073267	potassium inwardly-rectifying channel, subfamily J, member 12	---	473.988	466.523
GSMG0005307	B9d1	1.21598	0.10401	0.430525	chr11:61505143-61512931	B9 protein domain 1	---	1415.8	1164.42
GSMG0005313	Specc1	-1.08696	0.651854	0.905642	chr11:61956763-62223013	sperm antigen with calponin homology and coiled-coil domains 1	---	261.661	284.585
GSMG0005318	Ttc19	1.23575	0.00768914	0.0906324	chr11:62281473-62316450	tetratricopeptide repeat domain 19	---	2303.12	1863.28
GSMG0005325	Trpv2	1.02272	0.820255	0.944886	chr11:62574486-62600305	transient receptor potential cation channel, subfamily V, member 2	ENSMUSG00000018507	697.287	681.838
GSMG0005326	2410006H16Rik	-1.01049	0.951163	0.985138	chr11:62602875-62604807	RIKEN cDNA 2410006H16 gene	ENSMUSG00000086841	799.137	807.832
GSMG0005329	Mmgt2	1.16318	0.406044	0.795894	chr11:62648664-62666359	membrane magnesium transporter 2	ENSMUSG00000048497	335.839	288.922
GSMG0005332	Tvp23b	1.48174	0.000642488	0.0207291	chr11:62879453-62895185	trans-golgi network vesicle protein 23B	ENSMUSG00000014177	2833.69	1912.22
GSMG0005340	2810001G20Rik	1.01638	0.890819	0.954981	chr11:64079483-64083259	RIKEN cDNA 2810001G20 gene	ENSMUSG00000087497	757.089	744.948
GSMG0005345	Elac2	-1.00038	0.996526	0.998139	chr11:64979034-65002076	elaC ribonuclease Z 2	---	2341.96	2342.75
GSMG0005347	Zkscan6	1.11446	0.245587	0.677258	chr11:65807175-65829238	zinc finger with KRAB and SCAN domains 6	---	898.907	806.026
GSMG0005355	Sco1	1.04708	0.522894	0.845315	chr11:67052668-67068155	SCO1 cytochrome c oxidase assembly protein	ENSMUSG00000069844	1398.49	1336.13
GSMG0005361	Myh8	1.28781	0.0307812	0.210323	chr11:67277124-67308634	myosin, heavy polypeptide 8, skeletal muscle, perinatal	ENSMUSG00000055775	1369.57	1063.95
GSMG0005364	Gas7	-1.8096	0.000347767	0.0139098	chr11:67532996-67688992	growth arrest specific 7	---	973.928	1762.88
GSMG0005371	Stx8	1.30728	0.00299225	0.0519919	chr11:67966457-68207148	syntaxin 8	---	6462.06	4942.92
GSMG0005379	Myh10	-2.3506	0.00198841	0.0406742	chr11:68691915-68816630	myosin, heavy polypeptide 10, non-muscle	---	2514.35	5910.61
GSMG0005389	Ctc1	-1.11219	0.248898	0.681717	chr11:69015911-69036478	CTS telomere maintenance complex component 1	---	3043.53	3385.49
GSMG0005391	Borcs6	1.21614	0.0657237	0.328551	chr11:69059732-69061576	BLOC-1 related complex subunit 6	ENSMUSG00000045176	4259.86	3503
GSMG0005392	Tmem107	1.3265	0.00954543	0.103575	chr11:69070809-69073292	transmembrane protein 107	---	889.324	670.858
GSMG0005394	Vamp2	1.29542	0.0170113	0.147669	chr11:69088509-69092381	vesicle-associated membrane protein 2	ENSMUSG00000020894	508298	392381
GSMG0005395	Per1	-1.06299	0.640986	0.905642	chr11:69095252-69109963	period circadian clock 1	---	2382.13	2531.66
GSMG0005397	Aloxe3	-1.13835	0.387316	0.793776	chr11:69126214-69149115	arachidonate lipoxygenase 3	ENSMUSG00000020892	160.445	183.25
GSMG0005401	Trappc1	1.25136	0.00485029	0.0679082	chr11:69323986-69325793	trafficking protein particle complex 1	ENSMUSG00000049299	9327.04	7452.61
GSMG0005402	Kcnab3	-1.32606	0.0515567	0.283863	chr11:69326257-69333041	potassium voltage-gated channel, shaker-related subfamily, beta member 3	ENSMUSG00000018470	5451.11	7228.72
GSMG0005403	Rnf227	1.40195	0.00336084	0.0556296	chr11:69340455-69342641	ring finger protein 227	ENSMUSG00000043419	12154.1	8669.49
GSMG0005404	Naa38	1.4183	0.00556394	0.0741091	chr11:69395790-69396674	N(alpha)-acetyltransferase 38, NatC auxiliary subunit	ENSMUSG00000059278	7385.52	5207.46
GSMG0005408	Trp53	-1.13284	0.225429	0.653925	chr11:69580359-69591873	transformation related protein 53	---	995.804	1128.74
GSMG0005410	Sat2	1.28442	0.0218616	0.171469	chr11:69622051-69623882	spermidine/spermine N1-acetyl transferase 2	---	778.222	606.087
GSMG0005411	Fxr2	-1.11729	0.161485	0.551283	chr11:69632957-69653297	fragile X mental retardation, autosomal homolog 2	ENSMUSG00000018765	11039.8	12334.7
GSMG0005416	Zbtb4	-1.13821	0.190472	0.598954	chr11:69765911-69784026	zinc finger and BTB domain containing 4	---	18786.6	21383.4
GSMG0005419	---	-4.59609	0.0670752	0.332256	chr11:69823235-69823608	---	---	5.77083	26.7761
GSMG0005420	Tmem256	1.49801	0.000362307	0.0142903	chr11:69838525-69839612	transmembrane protein 256	ENSMUSG00000070394	8083.78	5396.3
GSMG0005421	Plscr3	1.02136	0.847835	0.948986	chr11:69846371-69852058	phospholipid scramblase 3	---	522.676	511.781
GSMG0005423	Neurl4	-1.13709	0.139026	0.507199	chr11:69901816-69913824	neuralized E3 ubiquitin protein ligase 4	---	2260.66	2570.8
GSMG0005424	Gps2	-1.0763	0.459154	0.841844	chr11:69914020-69916593	G protein pathway suppressor 2	---	1142.19	1229.44
GSMG0005425	Ybx2	1.16648	0.442287	0.830068	chr11:69935796-69941603	Y box protein 2	---	74.8459	63.957
GSMG0005427	Ctdnep1	1.13182	0.10115	0.424006	chr11:69981155-69990601	CTD nuclear envelope phosphatase 1	ENSMUSG00000018559	2996.83	2647.19
GSMG0005428	Gabarap	1.403	0.00104555	0.0278173	chr11:69991370-69994949	gamma-aminobutyric acid receptor associated protein	ENSMUSG00000018567	37804.7	26945.6
GSMG0005429	Phf23	1.14093	0.136675	0.502392	chr11:69995766-70000011	PHD finger protein 23	---	2447.18	2144.64
GSMG0005430	Dvl2	1.13688	0.317694	0.750602	chr11:70000592-70012301	dishevelled segment polarity protein 2	ENSMUSG00000020888	243.808	214.31
GSMG0005431	Dlg4	-1.04904	0.693773	0.905642	chr11:70017203-70045532	discs large MAGUK scaffold protein 4	---	43951.7	46107.3
GSMG0005436	Slc16a11	-1.04464	0.840459	0.948986	chr11:70213910-70216414	solute carrier family 16 (monocarboxylic acid transporters), member 11	---	143.953	150.639
GSMG0005437	Arrb2	-1.06832	0.408929	0.799097	chr11:70432580-70440828	arrestin, beta 2	---	3892.78	4159.47
GSMG0005438	Med11	1.31014	0.00447712	0.064982	chr11:70451913-70453732	mediator complex subunit 11	ENSMUSG00000018923	2280.86	1741
GSMG0005442	Psmb6	1.46251	0.00189271	0.0394916	chr11:70525357-70527858	proteasome (prosome, macropain) subunit, beta type 6	ENSMUSG00000018286	33406.5	22841.9
GSMG0005443	Pld2	1.08681	0.549183	0.864554	chr11:70540064-70558114	phospholipase D2	---	252.258	231.993
GSMG0005444	Mink1	-1.4824	0.000311788	0.0131001	chr11:70562881-70614482	misshapen-like kinase 1 (zebrafish)	---	8722.39	12931
GSMG0005448	Rnf167	1.25288	0.0319912	0.214959	chr11:70647235-70651873	ring finger protein 167	---	4403.84	3515.12
GSMG0005451	Eno3	1.19511	0.114244	0.452541	chr11:70657176-70662512	enolase 3, beta muscle	---	429.086	358.929
GSMG0005453	Kif1c	-1.97476	0.00128996	0.0317747	chr11:70700546-70731970	kinesin family member 1C	---	117.23	231.716
GSMG0005455	Zfp3	1.18287	0.0861449	0.384146	chr11:70764446-70772926	zinc finger protein 3	ENSMUSG00000043602	1246.17	1053.51
GSMG0005456	Rabep1	-1.29518	0.0690212	0.337404	chr11:70844761-70943104	rabaptin, RAB GTPase binding effector protein 1	---	4603.52	5962.16
GSMG0005460	Rpain	1.38298	0.00165606	0.036233	chr11:70970199-70977933	RPA interacting protein	---	1001.48	724.133
GSMG0005462	Mis12	1.05716	0.549127	0.864554	chr11:71019609-71027369	MIS12 kinetochore complex component	ENSMUSG00000040599	2634.11	2491.01
GSMG0005464	Wscd1	-1.10517	0.341922	0.765178	chr11:71750685-71793496	WSC domain containing 1	---	8563.56	9464.01
GSMG0005465	Pimreg	-1.21044	0.510997	0.845039	chr11:72042500-72047371	PICALM interacting mitotic regulator	ENSMUSG00000020808	46.7427	56.7814
GSMG0005466	Txndc17	1.38788	0.001426	0.0336545	chr11:72207546-72210487	thioredoxin domain containing 17	ENSMUSG00000020803	3852.7	2775.78
GSMG0005467	4930563E22Rik	1.17606	0.308598	0.744855	chr11:72215137-72218450	RIKEN cDNA 4930563E22 gene	ENSMUSG00000053574	271.05	230.936
GSMG0005472	Ube2g1	1.12977	0.238153	0.669162	chr11:72607261-72687150	ubiquitin-conjugating enzyme E2G 1	ENSMUSG00000020794	7263.77	6429.33
GSMG0005478	Ankfy1	-1.3037	0.164057	0.556017	chr11:72689991-72772146	ankyrin repeat and FYVE domain containing 1	ENSMUSG00000020790	247.696	323.091
GSMG0005485	Camkk1	-1.48163	0.000320334	0.0132826	chr11:73018988-73042063	calcium/calmodulin-dependent protein kinase kinase 1, alpha	---	2770.53	4104.76
GSMG0005486	Ncbp3	1.02773	0.770931	0.922933	chr11:73047867-73083548	nuclear cap binding subunit 3	ENSMUSG00000020783	1323.71	1287.73
GSMG0005490	Tax1bp3	1.20796	0.0426896	0.255895	chr11:73177081-73183162	Tax1 (human T cell leukemia virus type I) binding protein 3	ENSMUSG00000040158	717.123	593.542
GSMG0005491	Shpk	1.06184	0.731767	0.905642	chr11:73199459-73224506	sedoheptulokinase	ENSMUSG00000005951	101.005	95.1696
GSMG0005505	Ccdc92b	-1.33894	0.000938988	0.0259546	chr11:74619605-74641516	coiled-coil domain containing 92B	ENSMUSG00000069814	3792.55	5077.87
GSMG0005506	Cluh	-1.10759	0.366427	0.787082	chr11:74649464-74670854	clustered mitochondria (cluA/CLU1) homolog	ENSMUSG00000020741	2184.27	2419.49
GSMG0005507	Mettl16	1.08942	0.312395	0.748924	chr11:74770851-74821842	methyltransferase like 16	ENSMUSG00000010554	1469.51	1348.35
GSMG0005508	---	-1.30107	0.139441	0.508016	chr11:74823795-74825946	---	---	206.122	268.736
GSMG0005509	---	-1.38812	0.0758158	0.356633	chr11:74827667-74828523	---	---	86.0283	119.083
GSMG0005511	Tsr1	-1.01643	0.861004	0.948986	chr11:74898070-74909338	TSR1 20S rRNA accumulation	ENSMUSG00000038335	1133.87	1151.86
GSMG0005512	Smg6	-1.63135	0.000480607	0.0172723	chr11:74925854-75164444	Smg-6 homolog, nonsense mediated mRNA decay factor (C. elegans)	ENSMUSG00000038290	956.549	1560.7
GSMG0005519	Rtn4rl1	-1.07776	0.389157	0.793776	chr11:75193792-75267762	reticulon 4 receptor-like 1	ENSMUSG00000045287	5941.03	6402.75
GSMG0005523	Smyd4	-1.08291	0.436797	0.825213	chr11:75348433-75405705	SET and MYND domain containing 4	ENSMUSG00000018809	696.125	754.486
GSMG0005525	Mir22hg	1.14662	0.266173	0.701057	chr11:75461537-75466690	Mir22 host gene (non-protein coding)	ENSMUSG00000085148	1821.05	1588.33
GSMG0005527	Prpf8	-1.24226	0.109359	0.442104	chr11:75486777-75509447	pre-mRNA processing factor 8	ENSMUSG00000020850	4795.2	5956.9
GSMG0005530	Slc43a2	-1.35001	0.0234992	0.179084	chr11:75531694-75577570	solute carrier family 43, member 2	---	3131.95	4228.41
GSMG0005531	Pitpna	1.05032	0.446476	0.833369	chr11:75588079-75628803	phosphatidylinositol transfer protein, alpha	ENSMUSG00000017781	23757.6	22618.4
GSMG0005533	Inpp5k	-1.05465	0.579911	0.889227	chr11:75630988-75648871	inositol polyphosphate 5-phosphatase K	ENSMUSG00000006127	1448.51	1528.1
GSMG0005534	Myo1c	-1.12109	0.43658	0.825017	chr11:75650519-75674632	myosin IC	---	755.11	846.868
GSMG0005535	Crk	1.19731	0.0676856	0.333721	chr11:75679259-75708428	v-crk avian sarcoma virus CT10 oncogene homolog	---	19906.2	16625.8
GSMG0005539	Ywhae	1.19589	0.00966494	0.104386	chr11:75732887-75765848	tyrosine 3-monooxygenase/tryptophan 5-monooxygenase activation protein, epsilon polypeptide	ENSMUSG00000020849	103753	86757.3
GSMG0005541	1700016K19Rik	-1.07241	0.826039	0.944886	chr11:75999912-76003567	RIKEN cDNA 1700016K19 gene	ENSMUSG00000053783	96.1211	103.261
GSMG0005545	Tlcd3a	-1.21508	0.103595	0.429488	chr11:76179670-76214839	TLC domain containing 3A	ENSMUSG00000069808	558.322	678.667
GSMG0005547	Mrm3	1.31789	0.00409121	0.0620972	chr11:76243735-76250622	mitochondrial rRNA methyltransferase 3	ENSMUSG00000038046	2093.61	1588.49
GSMG0005548	Timm22	1.15176	0.163518	0.5551	chr11:76406925-76416313	translocase of inner mitochondrial membrane 22	---	8563.77	7435.65
GSMG0005549	Bhlha9	-1.07895	0.857361	0.948986	chr11:76672470-76673676	basic helix-loop-helix family, member a9	ENSMUSG00000044243	71.7024	77.4649
GSMG0005550	Trarg1	-1.87723	0.191148	0.59985	chr11:76679873-76698664	trafficking regulator of GLUT4 (SLC2A4) 1	ENSMUSG00000046275	252.68	474.48
GSMG0005552	Blmh	1.10893	0.211951	0.632486	chr11:76945656-76987389	bleomycin hydrolase	ENSMUSG00000020840	7354.43	6632.02
GSMG0005560	Ssh2	-1.43217	0.0304894	0.209098	chr11:77216425-77460220	slingshot protein phosphatase 2	---	2029.91	2906.88
GSMG0005563	Coro6	-1.263	0.0965785	0.411872	chr11:77462580-77470483	coronin 6	---	3085.82	3896.99
GSMG0005564	---	-1.02176	0.89509	0.957055	chr11:77489853-77491409	---	---	158.718	162.542
GSMG0005565	Git1	-1.2612	0.00461521	0.0659856	chr11:77493288-77507774	GIT ArfGAP 1	ENSMUSG00000011877	11519.4	14528.4
GSMG0005568	Nufip2	-1.06657	0.550406	0.865474	chr11:77686138-77741921	nuclear fragile X mental retardation protein interacting protein 2	ENSMUSG00000037857	1415.07	1509.04
GSMG0005572	Sez6	-1.58074	0.441811	0.829667	chr11:77930779-77979040	seizure related gene 6	---	1584.44	2504.63
GSMG0005573	Phf12	-1.25785	0.0227141	0.175753	chr11:77982728-78030533	PHD finger protein 12	ENSMUSG00000037791	1851.04	2327.99
GSMG0005576	Dhrs13	1.15896	0.269777	0.70398	chr11:78032313-78037864	dehydrogenase/reductase (SDR family) member 13	ENSMUSG00000020834	563.446	486.502
GSMG0005577	Flot2	-1.00114	0.990124	0.996061	chr11:78037931-78060433	flotillin 2	---	7892.28	7901.79
GSMG0005581	Fam222b	-1.01177	0.91702	0.968038	chr11:78094689-78157339	family with sequence similarity 222, member B	---	12612.9	12761
GSMG0005586	Rab34	1.07512	0.571199	0.882083	chr11:78188427-78192775	RAB34, member RAS oncogene family	---	312.192	290.079
GSMG0005588	Sdf2	1.34035	0.00402181	0.0615274	chr11:78245746-78255495	stromal cell derived factor 2	---	7637.04	5697.87
GSMG0005589	2610507B11Rik	-1.26595	0.104898	0.432392	chr11:78261752-78290625	RIKEN cDNA 2610507B11 gene	ENSMUSG00000010277	5501.58	6964.18
GSMG0005590	Rskr	-1.0926	0.767447	0.920894	chr11:78290841-78296805	ribosomal protein S6 kinase related	ENSMUSG00000037593	40.5916	44.3725
GSMG0005592	Aldoc	1.41466	0.00438177	0.0639525	chr11:78323073-78327785	aldolase C, fructose-bisphosphate	---	18445.5	13038.9
GSMG0005593	Pigs	1.0633	0.459234	0.841942	chr11:78328422-78343010	phosphatidylinositol glycan anchor biosynthesis, class S	ENSMUSG00000041958	4911.32	4619.09
GSMG0005594	Unc119	1.18453	0.0438977	0.259488	chr11:78343495-78349163	unc-119 lipid binding chaperone	---	7730.88	6526.55
GSMG0005595	Ift20	1.31476	0.0111208	0.11419	chr11:78536361-78541732	intraflagellar transport 20	ENSMUSG00000001105	4169.65	3171.67
GSMG0005597	Slc46a1	1.35711	0.0139432	0.130863	chr11:78465701-78471944	solute carrier family 46, member 1	ENSMUSG00000020829	1050.81	774.425
GSMG0005598	Vtn	-1.02425	0.889969	0.954492	chr11:78499120-78502325	vitronectin	ENSMUSG00000017344	223.825	228.869
GSMG0005600	Poldip2	1.16022	0.0485026	0.274915	chr11:78512265-78522861	polymerase (DNA-directed), delta interacting protein 2	ENSMUSG00000001100	17144.3	14776.7
GSMG0005603	Lyrm9	-1.20611	0.106536	0.435785	chr11:78826581-78843899	LYR motif containing 9	ENSMUSG00000072640	2324.5	2803.84
GSMG0005606	Nf1	-1.50029	0.00418091	0.0627018	chr11:79339886-79581609	neurofibromin 1	---	3991.54	5988.06
GSMG0005613	Rab11fip4	-1.25016	0.0251382	0.18655	chr11:79591015-79698022	RAB11 family interacting protein 4 (class II)	ENSMUSG00000017639	40662.1	50834.2
GSMG0005616	Suz12	-1.13323	0.226529	0.65529	chr11:79993065-80034122	SUZ12 polycomb repressive complex 2 subunit	---	2430.97	2754.36
GSMG0005619	Rnf135	1.14575	0.715971	0.905642	chr11:80183869-80199755	ring finger protein 135	ENSMUSG00000020707	43.7372	38.3883
GSMG0005620	Rhot1	1.09458	0.276887	0.706452	chr11:80209050-80267907	ras homolog family member T1	---	4329.87	3955.43
GSMG0005624	Rhbdl3	-1.22089	0.0395892	0.243698	chr11:80300912-80355986	rhomboid like 3	ENSMUSG00000017692	887.838	1083.87
GSMG0005627	Zfp207	1.07463	0.314806	0.750602	chr11:80383279-80405871	zinc finger protein 207	---	2824.61	2628.56
GSMG0005629	Psmd11	-1.00953	0.885256	0.952058	chr11:80428615-80472306	proteasome (prosome, macropain) 26S subunit, non-ATPase, 11	ENSMUSG00000017428	3296.29	3328.23
GSMG0005631	Cdk5r1	-1.09963	0.195992	0.606902	chr11:80477022-80481183	cyclin-dependent kinase 5, regulatory subunit 1 (p35)	ENSMUSG00000048895	43354.7	47674.5
GSMG0005632	Tmem98	1.24277	0.588372	0.894917	chr11:80810366-80822266	transmembrane protein 98	ENSMUSG00000035413	29.4201	23.686
GSMG0005647	Zfp830	1.06367	0.478442	0.845039	chr11:82764342-82767622	zinc finger protein 830	ENSMUSG00000046010	1086.57	1021.71
GSMG0005648	Lig3	-1.32554	0.0840111	0.378266	chr11:82781109-82807414	ligase III, DNA, ATP-dependent	---	609.268	807.699
GSMG0005659	AA465934	-1.37673	0.343002	0.766671	chr11:83291699-83294929	expressed sequence AA465934	ENSMUSG00000093483	471.296	648.522
GSMG0005660	Ap2b1	-1.05299	0.551111	0.866111	chr11:83302696-83405035	adaptor-related protein complex 2, beta 1 subunit	---	14328.6	15088.2
GSMG0005662	Rasl10b	1.20798	0.209753	0.629079	chr11:83409137-83421039	RAS-like, family 10, member B	---	2706.89	2241.02
GSMG0005665	Taf15	-1.23075	0.118956	0.463584	chr11:83473086-83506743	TATA-box binding protein associated factor 15	---	560.024	690.168
GSMG0005669	Wfdc18	1.98557	0.032807	0.218721	chr11:83709004-83711359	WAP four-disulfide core domain 18	ENSMUSG00000000983	108.262	54.5459
GSMG0005672	Heatr6	-1.35908	0.241765	0.672378	chr11:83753637-83783754	HEAT repeat containing 6	ENSMUSG00000000976	66.229	90.3904
GSMG0005674	Ddx52	1.0016	0.985914	0.994056	chr11:83942090-83963077	DExD box helicase 52	ENSMUSG00000020677	960.703	959.678
GSMG0005675	Synrg	-1.11118	0.336591	0.758575	chr11:83964431-84044578	synergin, gamma	---	1307.43	1453.55
GSMG0005677	---	1.01049	0.893751	0.956401	chr11:84009726-84012082	---	---	2093.23	2070.88
GSMG0005679	Acaca	-1.43325	0.0463518	0.267338	chr11:84129672-84401650	acetyl-Coenzyme A carboxylase alpha	---	5443.54	7802.12
GSMG0005683	Lhx1os	1.42473	0.142029	0.513117	chr11:84525660-84535831	LIM homeobox 1, opposite strand	ENSMUSG00000087211	64.3769	45.3795
GSMG0005684	---	-1.49886	0.0232417	0.177959	chr11:84818862-84820782	---	---	94.4171	141.841
GSMG0005688	Car4	-1.20156	0.815103	0.944037	chr11:84957754-84966052	carbonic anhydrase 4	ENSMUSG00000000805	44.5579	53.6158
GSMG0005692	Ppm1d	-1.03702	0.775277	0.924813	chr11:85311254-85347071	protein phosphatase 1D magnesium-dependent, delta isoform	ENSMUSG00000020525	303.843	315.427
GSMG0005694	Bcas3	-1.15091	0.215381	0.637184	chr11:85353164-85826057	breast carcinoma amplified sequence 3	---	1182.07	1360.86
GSMG0005702	Brip1os	1.26755	0.0768164	0.359124	chr11:86201360-86304445	BRCA1 interacting protein C-terminal helicase 1, opposite strand	---	1000.63	789.456
GSMG0005706	Rnft1	1.26863	0.0925157	0.40094	chr11:86484656-86499007	ring finger protein, transmembrane 1	ENSMUSG00000020521	256.878	202.124
GSMG0005708	Tubd1	1.38095	0.00709792	0.0861084	chr11:86544990-86567359	tubulin, delta 1	---	507.354	367.294
GSMG0005711	Ptrh2	1.26466	0.0231585	0.177624	chr11:86683983-86692457	peptidyl-tRNA hydrolase 2	ENSMUSG00000072582	1767.39	1397.59
GSMG0005714	Ska2	1.20868	0.0600787	0.310864	chr11:87109231-87124634	spindle and kinetochore associated complex subunit 2	ENSMUSG00000020492	641.368	530.434
GSMG0005716	Trim37	1.03429	0.661562	0.905642	chr11:87127074-87250860	tripartite motif-containing 37	ENSMUSG00000018548	32980.6	31886.5
GSMG0005721	Septin4	1.20604	0.0198808	0.161472	chr11:87566689-87590543	septin 4	---	4985.9	4134.23
GSMG0005722	Mtmr4	-1.02283	0.821299	0.944886	chr11:87592166-87616302	myotubularin related protein 4	---	8264.17	8452.49
GSMG0005726	Supt4a	1.34857	0.00435577	0.063864	chr11:87737527-87743620	SPT4A, DSIF elongation factor subunit	---	6652.73	4933.18
GSMG0005731	Mks1	-1.25049	0.423513	0.81346	chr11:87853065-87863802	MKS transition zone complex subunit 1	ENSMUSG00000034121	44.9996	56.4065
GSMG0005732	Srsf1	1.00324	0.969565	0.99042	chr11:88047373-88053757	serine and arginine-rich splicing factor 1	---	9479.56	9448.9
GSMG0005735	Vezf1	-1.06813	0.523582	0.845858	chr11:88068279-88084728	vascular endothelial zinc finger 1	---	2713.82	2898.27
GSMG0005748	C030037D09Rik	1.28009	0.320589	0.750602	chr11:88718643-88728572	RIKEN cDNA C030037D09 gene	---	133.458	104.419
GSMG0005753	Coil	1.0956	0.253191	0.685919	chr11:88973935-88991613	coilin	ENSMUSG00000033983	1384.61	1264.07
GSMG0005754	Trim25	-1.40837	0.191966	0.600822	chr11:88999402-89020293	tripartite motif-containing 25	ENSMUSG00000000275	29.5225	41.6142
GSMG0005755	Dgkeos	1.95732	0.0436384	0.25865	chr11:89060751-89067884	diacylglycerol kinase, epsilon, opposite strand	---	38.5792	19.7987
GSMG0005756	Gm525	1.57389	0.00488833	0.0682808	chr11:89073841-89093064	predicted gene 525	ENSMUSG00000072553	3200.92	2033.5
GSMG0005758	Mmd	1.16659	0.392006	0.793776	chr11:90187683-90278577	monocyte to macrophage differentiation-associated	ENSMUSG00000003948	8785.47	7531.01
GSMG0005761	Cox11	1.13363	0.279952	0.709356	chr11:90638171-90645977	cytochrome c oxidase assembly protein 11, copper chaperone	ENSMUSG00000020544	335.195	296.288
GSMG0005764	Car10	-1.02048	0.780977	0.926705	chr11:93098366-93601751	carbonic anhydrase 10	---	8762.22	8941.3
GSMG0005778	Spag9	-1.31937	0.077911	0.361918	chr11:93996089-94126093	sperm associated antigen 9	---	7509.79	9907.9
GSMG0005781	Tob1	1.06918	0.520097	0.845039	chr11:94211437-94215495	transducer of ErbB-2.1	ENSMUSG00000037573	3762.23	3519.07
GSMG0005783	Ankrd40	1.09903	0.261677	0.694785	chr11:94328001-94341847	ankyrin repeat domain 40	---	6116.51	5564.7
GSMG0005791	Lrrc59	1.01816	0.75923	0.91725	chr11:94629768-94645223	leucine rich repeat containing 59	ENSMUSG00000020869	13069	12835.7
GSMG0005792	Mrpl27	1.16391	0.099867	0.420908	chr11:94653762-94660090	mitochondrial ribosomal protein L27	ENSMUSG00000024414	7595.13	6525.48
GSMG0005797	Ppp1r9b	-1.23251	0.0109896	0.113063	chr11:94991212-95006898	protein phosphatase 1, regulatory subunit 9B	ENSMUSG00000038976	13751.7	16949.4
GSMG0005798	Samd14	-1.1501	0.164277	0.556179	chr11:95009878-95026087	sterile alpha motif domain containing 14	ENSMUSG00000047181	1456.61	1675.63
GSMG0005802	Fam117a	-1.98218	0.00478854	0.0674844	chr11:95337016-95381871	family with sequence similarity 117, member A	ENSMUSG00000038893	44.2308	86.6913
GSMG0005803	Slc35b1	1.39187	0.000454849	0.0167296	chr11:95384856-95391774	solute carrier family 35, member B1	ENSMUSG00000020873	5174.2	3717.34
GSMG0005804	Spop	-1.04799	0.483022	0.845039	chr11:95414083-95493410	speckle-type BTB/POZ protein	---	1970.79	2065.64
GSMG0005808	Phb	1.35583	0.000899844	0.0254424	chr11:95666957-95680772	prohibitin	ENSMUSG00000038845	6311.9	4655.3
GSMG0005813	---	-1.36137	0.00384898	0.059769	chr11:95768884-95772332	---	---	810.478	1104.05
GSMG0005818	Snf8	1.3319	0.0117394	0.11812	chr11:96034885-96047429	SNF8, ESCRT-II complex subunit, homolog (S. cerevisiae)	---	7327.25	5501.28
GSMG0005834	Skap1	1.51208	0.0024384	0.0455542	chr11:96464591-96759622	src family associated phosphoprotein 1	---	1594.62	1054.75
GSMG0005844	Cbx1	-1.04097	0.671749	0.905642	chr11:96789133-96808643	chromobox 1	---	2554.11	2658.13
GSMG0005848	Copz2	1.27175	0.302536	0.737233	chr11:96849869-96861210	coatomer protein complex, subunit zeta 2	ENSMUSG00000018672	72.1102	56.7544
GSMG0005849	D030028A08Rik	-1.26748	0.373415	0.792915	chr11:96916269-96965078	RIKEN cDNA D030028A08 gene	ENSMUSG00000078700	149.313	189
GSMG0005851	---	-1.26754	0.384028	0.793776	chr11:96965885-96966877	---	---	63.8933	80.6448
GSMG0005853	Scrn2	1.27633	0.0489884	0.276526	chr11:97029952-97033958	secernin 2	ENSMUSG00000020877	1206.43	945.502
GSMG0005854	Mrpl10	1.25189	0.00959228	0.103898	chr11:97041582-97049213	mitochondrial ribosomal protein L10	ENSMUSG00000001445	13011.2	10393.4
GSMG0005855	Osbpl7	-1.27647	0.0486177	0.275431	chr11:97050820-97068904	oxysterol binding protein-like 7	ENSMUSG00000038534	795.097	1015.4
GSMG0005857	Mrpl45	1.16605	0.0172932	0.148927	chr11:97315716-97329920	mitochondrial ribosomal protein L45	ENSMUSG00000018882	4051.94	3475.46
GSMG0005860	Arhgap23	-1.36918	0.0010482	0.0278643	chr11:97450160-97502400	Rho GTPase activating protein 23	---	2416.43	3308.28
GSMG0005862	Mllt6	-1.90156	7.72929e-07	0.000262247	chr11:97663412-97685458	myeloid/lymphoid or mixed-lineage leukemia; translocated to, 6	---	621.05	1181.48
GSMG0005864	Cisd3	1.33739	0.000179631	0.00949689	chr11:97685596-97688625	CDGSH iron sulfur domain 3	ENSMUSG00000078695	5224.37	3906.23
GSMG0005865	Psmb3	1.37305	0.00247489	0.0459639	chr11:97703401-97713505	proteasome (prosome, macropain) subunit, beta type 3	ENSMUSG00000069744	16190	11791.3
GSMG0005866	Mir8102	1.09769	0.751252	0.913206	chr11:97744897-97745509	microRNA 8102	ENSMUSG00000098919	44.6817	40.985
GSMG0005869	B230217C12Rik	1.05409	0.571618	0.882255	chr11:97841135-97844099	RIKEN cDNA B230217C12 gene	---	3720.17	3529.14
GSMG0005870	---	-1.60124	0.000908968	0.0254495	chr11:97846890-97847729	---	---	227.962	365.31
GSMG0005874	Cdk12	-1.62561	0.000685952	0.0215583	chr11:98203305-98280885	cyclin-dependent kinase 12	---	965.47	1569.63
GSMG0005877	Ppp1r1b	-1.07145	0.417415	0.8073	chr11:98348406-98357796	protein phosphatase 1, regulatory inhibitor subunit 1B	---	13845.7	14834.9
GSMG0005878	Stard3	1.11509	0.193459	0.603309	chr11:98358368-98381111	START domain containing 3	---	3079.92	2762.23
GSMG0005879	Tcap	1.51146	0.0037581	0.059044	chr11:98383811-98384953	titin-cap	ENSMUSG00000007877	491.8	324.916
GSMG0005880	Pnmt	-1.77171	0.494986	0.845039	chr11:98386602-98388196	phenylethanolamine-N-methyltransferase	ENSMUSG00000038216	122.332	216.783
GSMG0005881	Erbb2	-1.55295	0.066088	0.329605	chr11:98412484-98437716	erb-b2 receptor tyrosine kinase 2	ENSMUSG00000062312	48.0145	74.3705
GSMG0005882	Grb7	-1.22691	0.329803	0.750602	chr11:98446834-98455373	growth factor receptor bound protein 7	ENSMUSG00000019312	316.563	388.304
GSMG0005886	Gsdma	1.24926	0.260812	0.694129	chr11:98664350-98677708	gasdermin A	ENSMUSG00000017204	104.689	83.5711
GSMG0005887	Psmd3	-1.01138	0.855624	0.948986	chr11:98682554-98695977	proteasome (prosome, macropain) 26S subunit, non-ATPase, 3	ENSMUSG00000017221	12027.8	12164.9
GSMG0005889	Thra	-1.00109	0.99145	0.996806	chr11:98741785-98773402	thyroid hormone receptor alpha	---	33755.7	33792.6
GSMG0005891	Rapgefl1	-1.20962	0.0372737	0.23471	chr11:98836785-98853005	Rap guanine nucleotide exchange factor (GEF)-like 1	ENSMUSG00000038020	6900.61	8347.71
GSMG0005892	Wipf2	-1.15489	0.0973351	0.414091	chr11:98863598-98905578	WAS/WASL interacting protein family, member 2	ENSMUSG00000038013	8609.97	9944.02
GSMG0005896	Rara	-1.5076	0.0215461	0.169966	chr11:98937675-98974942	retinoic acid receptor, alpha	---	163.707	247.223
GSMG0005899	Igfbp4	-1.40123	0.639194	0.905642	chr11:99041242-99054391	insulin-like growth factor binding protein 4	ENSMUSG00000017493	2916.6	4086.86
GSMG0005901	---	-1.56123	0.273516	0.706334	chr11:99386709-99387873	---	---	168.712	263.095
GSMG0005902	A830036E02Rik	1.48967	0.618124	0.905642	chr11:99417243-99425497	RIKEN cDNA A830036E02 gene	ENSMUSG00000084890	275.9	185.235
GSMG0005911	Eif1	1.24988	0.0290406	0.203594	chr11:100319949-100322099	eukaryotic translation initiation factor 1	ENSMUSG00000035530	39553.8	31646.1
GSMG0005914	Fkbp10	-1.14726	0.561068	0.874356	chr11:100415691-100424839	FK506 binding protein 10	ENSMUSG00000001555	57.0159	65.6959
GSMG0005917	Odad4	-1.10098	0.631839	0.905642	chr11:100545608-100572568	outer dynein arm complex subunit 4	---	74.3129	81.8539
GSMG0005919	Cnp	1.05188	0.597448	0.901314	chr11:100574915-100591729	2',3'-cyclic nucleotide 3' phosphodiesterase	---	682.831	649.075
GSMG0005920	Nkiras2	1.01768	0.83724	0.947754	chr11:100620011-100627609	NFKB inhibitor interacting Ras-like protein 2	---	2788.77	2740.81
GSMG0005923	Stat5a	-1.35873	0.151369	0.530995	chr11:100859351-100885168	signal transducer and activator of transcription 5A	---	102.068	139.236
GSMG0005925	Atp6v0a1	-1.02797	0.794444	0.932099	chr11:101009441-101063715	ATPase, H+ transporting, lysosomal V0 subunit A1	---	71833.7	73842.9
GSMG0005928	Naglu	-1.05739	0.63314	0.905642	chr11:101069877-101077669	alpha-N-acetylglucosaminidase (Sanfilippo disease IIIB)	ENSMUSG00000001751	753.503	797.425
GSMG0005931	Mlx	1.2794	0.0133297	0.127637	chr11:101086710-101092212	MAX-like protein X	---	2435.08	1903.26
GSMG0005932	Tubg1	1.0144	0.882741	0.950941	chr11:101120117-101126423	tubulin, gamma 1	ENSMUSG00000035198	8043.21	7928.35
GSMG0005933	Tubg2	1.20505	0.0566462	0.299852	chr11:101155884-101161787	tubulin, gamma 2	ENSMUSG00000045007	8448.67	7011.4
GSMG0005934	Cntnap1	-1.26771	0.0575479	0.302175	chr11:101173771-101190720	contactin associated protein-like 1	ENSMUSG00000017167	11156.5	14143.4
GSMG0005936	Wnk4	-1.22443	0.350682	0.775854	chr11:101260563-101277409	WNK lysine deficient protein kinase 4	ENSMUSG00000035112	134.121	164.686
GSMG0005938	Psme3	1.17219	0.044794	0.26267	chr11:101316213-101323536	proteaseome (prosome, macropain) activator subunit 3 (PA28 gamma, Ki)	ENSMUSG00000078652	5654.09	4823.2
GSMG0005939	Aoc2	-1.11921	0.431357	0.82066	chr11:101325063-101329692	amine oxidase, copper containing 2 (retina-specific)	ENSMUSG00000078651	273.895	306.165
GSMG0005943	Rundc1	1.07569	0.350535	0.77576	chr11:101425083-101435663	RUN domain containing 1	ENSMUSG00000035007	4879.66	4536
GSMG0005944	Rpl27	1.56634	0.000314695	0.0131259	chr11:101442245-101445596	ribosomal protein L27	ENSMUSG00000063316	10328.7	6594.04
GSMG0005945	Ifi35	1.21276	0.290557	0.723788	chr11:101448410-101458701	interferon-induced protein 35	ENSMUSG00000010358	110.634	90.9609
GSMG0005946	Rnd2	1.56	9.81867e-05	0.00666276	chr11:101465039-101471852	Rho family GTPase 2	ENSMUSG00000001313	8021.96	5142.26
GSMG0005947	Nbr1	-1.30452	0.0347073	0.225758	chr11:101552107-101581953	NBR1, autophagy cargo receptor	---	6396.38	8344.12
GSMG0005948	Tmem106a	1.11931	0.531543	0.851775	chr11:101582240-101591786	transmembrane protein 106A	---	95.1922	85.1946
GSMG0005949	Rdm1	1.27349	0.25622	0.689122	chr11:101627947-101636084	RAD52 motif 1	ENSMUSG00000010362	313.104	246.154
GSMG0005950	Arl4d	-1.06456	0.737109	0.905642	chr11:101665541-101667832	ADP-ribosylation factor-like 4D	ENSMUSG00000034936	797.781	849.546
GSMG0005951	Dhx8	-1.35067	0.019264	0.15888	chr11:101732955-101769006	DEAH (Asp-Glu-Ala-His) box polypeptide 8	ENSMUSG00000034931	1590.88	2148.91
GSMG0005957	G6pc3	1.2932	0.00954041	0.103556	chr11:102189618-102194083	glucose 6 phosphatase, catalytic, 3	ENSMUSG00000034793	4832.21	3736.68
GSMG0005958	Hrob	-1.0871	0.616847	0.905642	chr11:102248882-102265183	homologous recombination factor with OB-fold	ENSMUSG00000034773	252.929	274.374
GSMG0005959	Asb16	1.00335	0.976557	0.990662	chr11:102268751-102279454	ankyrin repeat and SOCS box-containing 16	ENSMUSG00000034768	546.815	544.749
GSMG0005960	Tmub2	1.05171	0.549283	0.864554	chr11:102284951-102289435	transmembrane and ubiquitin-like domain containing 2	---	2978.05	2832.13
GSMG0005961	Rundc3a	1.06821	0.445265	0.832438	chr11:102393403-102402555	RUN domain containing 3A	---	23054.8	21583
GSMG0005962	Grn	1.0702	0.440939	0.828968	chr11:102430481-102436813	granulin	ENSMUSG00000034708	6347.53	5931.23
GSMG0005968	Adam11	-1.27284	0.0382901	0.238493	chr11:102761434-102780260	a disintegrin and metallopeptidase domain 11	---	4311.87	5488.93
GSMG0005971	Fam187a // Ccdc103	1.0982	0.721228	0.905642	chr11:102881224-102886731	family with sequence similarity 187, member A // coiled-coil domain containing 103	ENSMUSG00000020930,ENSMUSG00000075510	169.385	154.399
GSMG0005974	Nmt1	-1.07835	0.302295	0.736813	chr11:103028543-103068908	N-myristoyltransferase 1	ENSMUSG00000020936	7072.06	7626.1
GSMG0005975	Acbd4	1.16446	0.233262	0.664229	chr11:103101692-103114403	acyl-Coenzyme A binding domain containing 4	ENSMUSG00000056938	2301.43	1976.81
GSMG0005976	Hexim1	1.1145	0.202181	0.617105	chr11:103116325-103119725	hexamethylene bis-acetamide inducible 1	ENSMUSG00000048878	5786.23	5191.58
GSMG0005977	Hexim2	1.15681	0.140811	0.510866	chr11:103133313-103139908	hexamethylene bis-acetamide inducible 2	---	1362.98	1178.66
GSMG0005978	Fmnl1	-1.40909	0.00970154	0.104657	chr11:103171138-103198900	formin-like 1	---	2378.89	3352.36
GSMG0005982	---	1.01798	0.940983	0.980269	chr11:103355700-103361092	---	---	106.796	105.195
GSMG0005983	---	1.36163	0.145334	0.519896	chr11:103363577-103364649	---	---	65.2634	48.0117
GSMG0005988	Rprml	-1.07243	0.928729	0.973883	chr11:103649507-103650580	reprimo-like	ENSMUSG00000046215	1648.79	1768.23
GSMG0005989	C130046K22Rik	-1.44696	0.0157723	0.141146	chr11:103697723-103725573	RIKEN cDNA C130046K22 gene	---	478.866	693.784
GSMG0005990	Wnt3	1.03798	0.897113	0.957898	chr11:103774173-103818021	wingless-type MMTV integration site family, member 3	ENSMUSG00000000125	46.8923	45.0513
GSMG0005992	Arf2	1.2191	0.00941722	0.102749	chr11:103966725-103985350	ADP-ribosylation factor 2	---	8188.07	6716.12
GSMG0005993	Crhr1	-1.67067	0.0238964	0.180719	chr11:104132781-104175522	corticotropin releasing hormone receptor 1	ENSMUSG00000018634	81.2588	136.124
GSMG0005995	Mapt	-1.37966	0.00156422	0.0351853	chr11:104231436-104332090	microtubule-associated protein tau	---	4551.33	6279.58
GSMG0005996	---	-1.07908	0.930263	0.974682	chr11:104298964-104299045	---	---	3.50675	3.81232
GSMG0005998	Myl4	1.11211	0.479186	0.845039	chr11:104550663-104587213	myosin, light polypeptide 4	---	302.62	271.942
GSMG0006003	Mettl2	-1.02619	0.79808	0.93441	chr11:105126424-105141146	methyltransferase like 2	ENSMUSG00000020691	528.935	542.412
GSMG0006005	Tlk2	-1.28822	0.00939886	0.102672	chr11:105178802-105283959	tousled-like kinase 2 (Arabidopsis)	---	2150.67	2770.18
GSMG0006010	Mrc2	-1.62563	0.00369515	0.0584152	chr11:105292642-105351145	mannose receptor, C type 2	ENSMUSG00000020695	280.065	455.691
GSMG0006015	Tanc2	-1.63069	9.31381e-05	0.00645908	chr11:105589983-105929304	tetratricopeptide repeat, ankyrin repeat and coiled-coil containing 2	ENSMUSG00000053580	3965.39	6466.52
GSMG0006023	Ace	1.19492	0.233181	0.664121	chr11:105967945-105989964	angiotensin I converting enzyme (peptidyl-dipeptidase A) 1	---	438.361	366.923
GSMG0006025	Kcnh6	-1.03149	0.84893	0.948986	chr11:106008148-106035594	potassium voltage-gated channel, subfamily H (eag-related), member 6	---	1252.64	1292.37
GSMG0006026	Dcaf7	-1.02226	0.814813	0.943984	chr11:106036870-106059321	DDB1 and CUL4 associated factor 7	ENSMUSG00000049354	45415	46426
GSMG0006027	Taco1	-1.0002	0.998041	0.998824	chr11:106066060-106074206	translational activator of mitochondrially encoded cytochrome c oxidase I	ENSMUSG00000001983	2570.52	2571.87
GSMG0006030	Map3k3	-1.28698	0.106867	0.436458	chr11:106084587-106156656	mitogen-activated protein kinase kinase kinase 3	ENSMUSG00000020700	272.974	351.372
GSMG0006033	Ddx42	-1.08961	0.335329	0.75681	chr11:106216922-106249140	DEAD box helicase 42	ENSMUSG00000020705	3541.23	3858.76
GSMG0006034	Psmc5	1.31661	0.00224774	0.0436731	chr11:106256152-106263117	protease (prosome, macropain) 26S subunit, ATPase 5	ENSMUSG00000020708	26053.9	19788.5
GSMG0006039	Cep95	-1.50116	0.0273046	0.196615	chr11:106788637-106818860	centrosomal protein 95	---	112.865	168.807
GSMG0006040	1810010H24Rik	1.00515	0.963833	0.99042	chr11:107025869-107030443	RIKEN cDNA 1810010H24 gene	ENSMUSG00000078607	1291.77	1284.82
GSMG0006043	Psmd12	1.20046	0.0106524	0.111153	chr11:107479483-107504362	proteasome (prosome, macropain) 26S subunit, non-ATPase, 12	ENSMUSG00000020720	8800.19	7330
GSMG0006054	Axin2	-1.16395	0.276141	0.706334	chr11:108920345-108950779	axin 2	---	1237.37	1440.02
GSMG0006057	Gna13	-1.09601	0.221175	0.646469	chr11:109362794-109401368	guanine nucleotide binding protein, alpha 13	---	1471.97	1613.23
GSMG0006062	Arsg	1.27188	0.180076	0.58147	chr11:109473372-109573330	arylsulfatase G	---	163.326	128.441
GSMG0006064	Prkar1a	1.21956	0.0183546	0.154339	chr11:109649023-109669663	protein kinase, cAMP dependent regulatory, type I, alpha	---	55898.5	45835
GSMG0006069	Map2k6	1.5011	0.000271689	0.012141	chr11:110399102-110525522	mitogen-activated protein kinase kinase 6	---	921.216	613.133
GSMG0006072	---	1.0951	0.403463	0.793776	chr11:110520907-110523007	---	---	765.965	698.973
GSMG0006080	Sstr2	1.0517	0.831533	0.944886	chr11:113619327-113626016	somatostatin receptor 2	---	188.18	178.906
GSMG0006081	Cog1	-1.05326	0.580392	0.88975	chr11:113649167-113664064	component of oligomeric golgi complex 1	ENSMUSG00000018661	2550.1	2686.43
GSMG0006083	D11Wsu47e	1.11071	0.141586	0.512286	chr11:113684404-113726467	DNA segment, Chr 11, Wayne State University 47, expressed	---	810.303	729.813
GSMG0006087	Rpl38	1.66882	0.000162445	0.00897705	chr11:114668524-114672333	ribosomal protein L38	---	4708.98	2821.32
GSMG0006093	Gprc5c	-2.91755	0.00361725	0.0577625	chr11:114851532-114872617	G protein-coupled receptor, family C, group 5, member C	---	28.7313	83.9738
GSMG0006095	Slc9a3r1	-1.07572	0.486951	0.845039	chr11:115163340-115184170	solute carrier family 9 (sodium/hydrogen exchanger), member 3 regulator 1	ENSMUSG00000020733	17367.9	18682.7
GSMG0006096	Tmem104	-1.29161	0.0177153	0.151037	chr11:115187487-115247025	transmembrane protein 104	ENSMUSG00000045980	1669.52	2156.55
GSMG0006097	Otop2	1.08637	0.312108	0.748704	chr11:115307162-115332301	otopetrin 2	---	11265.3	10369.4
GSMG0006098	Otop3	-1.44495	0.0908869	0.396275	chr11:115334731-115346926	otopetrin 3	---	94.3947	135.999
GSMG0006099	Cdr2l	-1.15442	0.0915628	0.398122	chr11:115381916-115396132	cerebellar degeneration-related protein 2-like	ENSMUSG00000050910	761.387	879.221
GSMG0006101	Mrpl58	1.16229	0.0499335	0.2795	chr11:115403752-115412674	mitochondrial ribosomal protein L58	---	6973.81	5999.86
GSMG0006102	Kctd2	1.06204	0.435443	0.823817	chr11:115420126-115431273	potassium channel tetramerisation domain containing 2	ENSMUSG00000016940	17294.3	16284.5
GSMG0006105	Armc7	-1.18577	0.229909	0.65955	chr11:115475667-115490466	armadillo repeat containing 7	ENSMUSG00000057219	525.347	623.522
GSMG0006107	Nup85	1.1961	0.016438	0.14448	chr11:115564444-115583985	nucleoporin 85	ENSMUSG00000020739	2827.59	2363.69
GSMG0006111	Tmem94	-1.58759	0.00323562	0.0543067	chr11:115765433-115799366	transmembrane protein 94	---	265.013	421.234
GSMG0006112	Tsen54	1.17658	0.11917	0.46382	chr11:115814710-115823102	tRNA splicing endonuclease subunit 54	ENSMUSG00000020781	471.823	400.862
GSMG0006118	Sap30bp	-1.00881	0.9098	0.964612	chr11:115933637-115965534	SAP30 binding protein	ENSMUSG00000020755	2766.29	2790.84
GSMG0006121	Unk	-1.27622	0.012418	0.121992	chr11:116030315-116061214	unkempt family zinc finger	---	1456.32	1858.87
GSMG0006126	Ten1	1.36038	0.0116691	0.117878	chr11:116198855-116215317	TEN1 telomerase capping complex subunit	ENSMUSG00000020778	2220.16	1632.07
GSMG0006128	---	-1.47742	0.0462915	0.267328	chr11:116234527-116236133	---	---	90.7382	133.402
GSMG0006133	Sphk1	1.73965	0.0184609	0.154801	chr11:116531100-116536675	sphingosine kinase 1	---	150.883	86.4561
GSMG0006138	Snhg16	1.25989	0.415067	0.804782	chr11:116671658-116675796	small nucleolar RNA host gene 16	---	43.9377	34.8055
GSMG0006142	Mettl23	1.36326	0.0496824	0.278847	chr11:116843515-116850360	methyltransferase like 23	ENSMUSG00000090266	1816.66	1332.67
GSMG0006143	Mfsd11	1.08187	0.323877	0.750602	chr11:116853293-116875635	major facilitator superfamily domain containing 11	---	1735.75	1603.46
GSMG0006144	Mgat5b	-1.44594	0.00069256	0.0216796	chr11:116918863-116986945	mannoside acetylglucosaminyltransferase 5, isoenzyme B	ENSMUSG00000043857	3265.79	4722.45
GSMG0006147	Snhg20	1.5266	0.00200972	0.0409657	chr11:117076783-117078954	small nucleolar RNA host gene 20	ENSMUSG00000086859	357.955	234.738
GSMG0006148	Sec14l1	-1.16976	0.111678	0.447505	chr11:117115167-117159268	SEC14-like lipid binding 1	---	2647.15	3097.07
GSMG0006150	Septin9	-1.57056	1.92614e-06	0.000533135	chr11:117199661-117362325	septin 9	---	427.938	671.406
GSMG0006157	2900041M22Rik	1.29062	0.488461	0.845039	chr11:117611246-117613859	RIKEN cDNA 2900041M22 gene	---	62.5644	48.4251
GSMG0006158	Tnrc6c	-2.65474	1.99766e-07	9.69759e-05	chr11:117654289-117763437	trinucleotide repeat containing 6C	---	225.121	597.386
GSMG0006168	Pgs1	-1.00582	0.943324	0.981296	chr11:117986757-118024011	phosphatidylglycerophosphate synthase 1	---	5568.4	5601.31
GSMG0006175	Engase	-1.05666	0.716535	0.905642	chr11:118476832-118489204	endo-beta-N-acetylglucosaminidase	---	352.916	373.611
GSMG0006182	Gaa	-1.07375	0.506272	0.845039	chr11:119267963-119285458	glucosidase, alpha, acid	---	27647.1	29686.2
GSMG0006184	Slc26a11	-1.34811	0.106009	0.434853	chr11:119355557-119381076	solute carrier family 26, member 11	ENSMUSG00000039908	80.6032	109.174
GSMG0006188	Endov	-1.32512	0.0512521	0.283388	chr11:119491346-119511465	endonuclease V	---	410.133	543.73
GSMG0006189	Gm11762	-1.242	0.0506794	0.281787	chr11:119548628-119570532	predicted gene 11762	ENSMUSG00000087675	273.719	340.205
GSMG0006190	Rptor	-1.5391	0.0033406	0.055391	chr11:119602904-119899590	regulatory associated protein of MTOR, complex 1	ENSMUSG00000025583	1357.15	2089.15
GSMG0006197	Chmp6	1.00662	0.932857	0.976071	chr11:119913810-119919552	charged multivesicular body protein 6	ENSMUSG00000025371	4334.71	4306.41
GSMG0006199	Baiap2	-1.25575	0.191478	0.600291	chr11:119943089-120006782	brain-specific angiogenesis inhibitor 1-associated protein 2	---	2322.88	2917.35
GSMG0006201	Ndufaf8	1.5714	0.0134931	0.12859	chr11:120098934-120100494	NADH:ubiquinone oxidoreductase complex assembly factor 8	ENSMUSG00000078572	1574.4	1002.08
GSMG0006203	---	1.75911	0.00961678	0.104063	chr11:120185341-120186676	---	---	119.566	68.0211
GSMG0006204	Bahcc1	-2.28918	1.52416e-05	0.00208196	chr11:120232946-120292297	BAH domain and coiled-coil containing 1	---	284.351	651.95
GSMG0006206	0610009L18Rik	1.25234	0.195913	0.606756	chr11:120348678-120351190	RIKEN cDNA 0610009L18 gene	ENSMUSG00000043644	136.726	109.42
GSMG0006210	Tspan10	-1.38008	0.0279632	0.199312	chr11:120442631-120447321	tetraspanin 10	ENSMUSG00000039691	1527	2107.74
GSMG0006212	Ccdc137	-1.05337	0.684464	0.905642	chr11:120458120-120464354	coiled-coil domain containing 137	ENSMUSG00000049957	361.516	380.855
GSMG0006213	Hgs	-1.09477	0.272009	0.706034	chr11:120467635-120483984	HGF-regulated tyrosine kinase substrate	---	9568.09	10475.7
GSMG0006215	Slc25a10	-1.07538	0.448025	0.833944	chr11:120491837-120501161	solute carrier family 25 (mitochondrial carrier, dicarboxylate transporter), member 10	ENSMUSG00000025792	840.385	903.355
GSMG0006219	Anapc11	1.43632	0.00340738	0.0560514	chr11:120598421-120608198	anaphase promoting complex subunit 11	---	13393.9	9325.23
GSMG0006220	Npb	-1.01519	0.938314	0.978924	chr11:120608475-120609100	neuropeptide B	---	90.8289	92.4804
GSMG0006223	Gm17586	1.15012	0.295792	0.729988	chr11:120633399-120638088	predicted gene, 17586	---	769.759	669.83
GSMG0006226	Aspscr1	1.10919	0.286253	0.717714	chr11:120672973-120709447	alveolar soft part sarcoma chromosome region, candidate 1 (human)	---	2939.08	2649.62
GSMG0006227	Lrrc45	-1.53795	0.00622501	0.0798302	chr11:120713950-120721125	leucine rich repeat containing 45	ENSMUSG00000025145	530.666	816.157
GSMG0006228	Rac3	1.42079	0.000641539	0.0207197	chr11:120721464-120723969	Rac family small GTPase 3	ENSMUSG00000018012	7540.38	5307.33
GSMG0006229	Gps1	1.15273	0.137186	0.503464	chr11:120784270-120789102	G protein pathway suppressor 1	---	2449.19	2123.75
GSMG0006232	Slc16a3	1.15221	0.419728	0.809442	chr11:120948484-120960868	solute carrier family 16 (monocarboxylic acid transporters), member 3	---	154.701	134.373
GSMG0006236	Hexdc	-1.00053	0.995258	0.997927	chr11:121204433-121222659	hexosaminidase (glycosyl hydrolase family 20, catalytic domain) containing	---	700.719	701.53
GSMG0006239	Fn3krp	1.04552	0.675775	0.905642	chr11:121421373-121431287	fructosamine 3 kinase related protein	ENSMUSG00000039253	4427.55	4233.96
GSMG0006240	Fn3k	1.34176	0.0076148	0.0899916	chr11:121434953-121450490	fructosamine 3 kinase	---	10004.6	7456.35
GSMG0006241	Tbcd	1.06749	0.532852	0.852703	chr11:121451947-121617170	tubulin-specific chaperone d	ENSMUSG00000039230	6116.89	5729.93
GSMG0006244	Metrnl	1.07727	0.594483	0.898788	chr11:121681044-121717389	meteorin, glial cell differentiation regulator-like	ENSMUSG00000039208	501.685	465.929
GSMG0006250	---	-1.16845	0.315473	0.750602	chr11:3247071-3249060	---	---	210.779	245.895
GSMG0006251	Drg1	1.25509	0.027574	0.197776	chr11:3249907-3266463	developmentally regulated GTP binding protein 1	ENSMUSG00000020457	5478.72	4365.34
GSMG0006254	---	1.47826	0.119678	0.464604	chr11:3327118-3328081	---	---	65.0834	43.8106
GSMG0006256	Limk2	-1.2428	0.0259262	0.190031	chr11:3341843-3409238	LIM motif-containing protein kinase 2	---	2854.49	3547.28
GSMG0006257	Rnf185	-1.01909	0.811483	0.942038	chr11:3415353-3452957	ring finger protein 185	---	1004.8	1024.51
GSMG0006258	Inpp5j	-1.13201	0.266956	0.701606	chr11:3494272-3504822	inositol polyphosphate 5-phosphatase J	---	15017.9	17000.9
GSMG0006260	Tug1	-1.01103	0.894656	0.956878	chr11:3639785-3649674	taurine upregulated gene 1	---	2459.18	2486.12
GSMG0006261	Osbp2	-1.34909	0.00417012	0.0625697	chr11:3703731-3863904	oxysterol binding protein 2	---	3201.28	4319.11
GSMG0006264	Slc35e4	1.00566	0.954525	0.98654	chr11:3907022-3914665	solute carrier family 35, member E4	ENSMUSG00000048807	5313.72	5284.21
GSMG0006265	Tcn2	1.30593	0.00608221	0.0789461	chr11:3917064-3932078	transcobalamin 2	---	3829.83	2932.35
GSMG0006267	Mtfp1	1.14647	0.432827	0.821548	chr11:4091481-4095432	mitochondrial fission process 1	ENSMUSG00000004748	5985.16	5220.71
GSMG0006268	Sec14l2	-1.40915	0.0143686	0.133338	chr11:4097039-4118729	SEC14-like lipid binding 2	ENSMUSG00000003585	605.633	853.432
GSMG0006269	Ccdc157	-1.522	0.0125104	0.12267	chr11:4141123-4160295	coiled-coil domain containing 157	---	449.857	684.825
GSMG0006272	Mtmr3	-1.14734	0.249401	0.682591	chr11:4480868-4594815	myotubularin related protein 3	---	2163.46	2481.99
GSMG0006279	Uqcr10	1.51373	0.00108755	0.0284784	chr11:4701968-4704344	ubiquinol-cytochrome c reductase, complex III subunit X	---	28497.1	18825.9
GSMG0006280	Cabp7	-1.24234	0.292344	0.725378	chr11:4736892-4747179	calcium binding protein 7	ENSMUSG00000009075	784.36	974.612
GSMG0006281	Nf2	-1.19694	0.157494	0.54363	chr11:4765845-4849551	neurofibromin 2	---	2307.32	2761.38
GSMG0006282	Nefh	-1.79178	0.000540119	0.0185653	chr11:4938758-4948064	neurofilament, heavy polypeptide	ENSMUSG00000020396	5837.97	10461.2
GSMG0006284	Gas2l1	-1.12462	0.335365	0.756837	chr11:5054132-5065329	growth arrest-specific 2 like 1	---	962.01	1082.33
GSMG0006286	Ewsr1	-1.11315	0.166025	0.55898	chr11:5069688-5099096	Ewing sarcoma breakpoint region 1	---	11049.6	12299.8
GSMG0006287	Emid1	-1.40377	0.653614	0.905642	chr11:5106265-5152242	EMI domain containing 1	---	257.569	361.621
GSMG0006288	Kremen1	-2.01123	0.0407114	0.248138	chr11:5191555-5261623	kringle containing transmembrane protein 1	ENSMUSG00000020393	35.8378	72.4181
GSMG0006290	Znrf3	-1.33246	0.387841	0.793776	chr11:5276329-5444847	zinc and ring finger 3	---	31.7747	42.6913
GSMG0006298	Ccdc117	1.0239	0.803596	0.93719	chr11:5528890-5542217	coiled-coil domain containing 117	ENSMUSG00000020482	1995.1	1948.96
GSMG0006300	Mrps24	1.48084	0.00206387	0.0415327	chr11:5703982-5707701	mitochondrial ribosomal protein S24	ENSMUSG00000020477	3624.26	2447.46
GSMG0006301	Urgcp	-1.03032	0.722096	0.905642	chr11:5713417-5762399	upregulator of cell proliferation	---	8837.59	9105.99
GSMG0006306	Pgam2	1.02852	0.958142	0.988166	chr11:5801637-5803796	phosphoglycerate mutase 2	ENSMUSG00000020475	573.932	558.071
GSMG0006307	Polm	-1.07708	0.739431	0.906738	chr11:5827855-5838016	polymerase (DNA directed), mu	ENSMUSG00000020474	55.2583	59.3625
GSMG0006308	Pold2	1.06256	0.505467	0.845039	chr11:5872180-5878256	polymerase (DNA directed), delta 2, regulatory subunit	ENSMUSG00000020471	1935.58	1821.82
GSMG0006310	Gck	-1.01317	0.944246	0.981833	chr11:5900820-5950081	glucokinase	---	192.616	195.407
GSMG0006311	Camk2b	-1.11455	0.150145	0.528759	chr11:5969668-6065750	calcium/calmodulin-dependent protein kinase II, beta	---	25004	27868.4
GSMG0006313	Nudcd3	1.11469	0.18996	0.597942	chr11:6105691-6200451	NudC domain containing 3	ENSMUSG00000053838	20547.1	18433.1
GSMG0006317	Ddx56	1.09742	0.224381	0.652193	chr11:6257206-6267770	DEAD box helicase 56	ENSMUSG00000004393	5313.45	4842.1
GSMG0006318	Tmed4	1.36475	0.00349729	0.0566787	chr11:6270376-6274870	transmembrane p24 trafficking protein 4	ENSMUSG00000004394	12931.5	9475.34
GSMG0006321	H2az2	1.31678	0.0131771	0.126419	chr11:6427226-6444447	H2A.Z histone variant 2	---	3282.5	2493.01
GSMG0006327	Snhg15	1.29473	0.281296	0.711188	chr11:6524542-6528762	small nucleolar RNA host gene 15	ENSMUSG00000085156	69.8587	53.7189
GSMG0006328	Nacad	-1.22344	0.0680428	0.334636	chr11:6597824-6606054	NAC alpha domain containing	ENSMUSG00000041073	5585.74	6834.59
GSMG0006329	Tbrg4	-1.00875	0.905349	0.962129	chr11:6615598-6626067	transforming growth factor beta regulated gene 4	---	2561.69	2584.18
GSMG0006333	Igfbp3	1.28872	0.0066456	0.083337	chr11:7206095-7213923	insulin-like growth factor binding protein 3	ENSMUSG00000020427	515.199	399.469
GSMG0006338	Hus1	1.06363	0.713009	0.905642	chr11:8993138-9011191	HUS1 checkpoint clamp component	---	162.128	152.361
GSMG0006340	Zpbp	1.05253	0.835488	0.946831	chr11:11279626-11462419	zona pellucida binding protein	ENSMUSG00000020193	66.8096	63.8798
GSMG0006345	Fignl1	1.55644	0.0126987	0.123824	chr11:11787431-11808962	fidgetin-like 1	---	100.127	64.3211
GSMG0006347	Grb10	-1.31529	0.114886	0.453964	chr11:11930499-12037953	growth factor receptor bound protein 10	---	287.672	378.394
GSMG0006351	Cobl	-1.40304	0.0219704	0.172078	chr11:12236608-12464962	cordon-bleu WH2 repeat	---	707.67	993.491
GSMG0006356	Sec61g	1.71226	3.50459e-05	0.00332242	chr11:16501630-16508484	SEC61, gamma subunit	---	1853.15	1082.09
GSMG0006361	Plek	1.14421	0.247443	0.679743	chr11:16971206-17052382	pleckstrin	ENSMUSG00000020120	1260.59	1100.92
GSMG0006362	Pno1	1.2816	0.0073213	0.0877722	chr11:17203202-17211589	partner of NOB1 homolog	ENSMUSG00000020116	1832.16	1429.69
GSMG0006363	Etaa1	-1.07037	0.507548	0.845039	chr11:17938753-17953876	Ewing tumor-associated antigen 1	ENSMUSG00000016984	675.757	722.642
GSMG0006379	Actr2	-1.00799	0.907703	0.963362	chr11:20062306-20112951	ARP2 actin-related protein 2	ENSMUSG00000020152	26598.1	26810.4
GSMG0006384	Cep68	1.00464	0.957693	0.98793	chr11:20226690-20249431	centrosomal protein 68	ENSMUSG00000044066	1566.53	1559.08
GSMG0006386	Slc1a4	-1.15575	0.231904	0.661917	chr11:20302180-20332715	solute carrier family 1 (glutamate/neutral amino acid transporter), member 4	ENSMUSG00000020142	607.794	703.192
GSMG0006390	Aftph	1.0962	0.16423	0.556082	chr11:20685087-20741556	aftiphilin	---	2170.21	1979.09
GSMG0006393	Ugp2	1.17561	0.113804	0.451706	chr11:21321126-21371267	UDP-glucose pyrophosphorylase 2	---	5900.63	5018.85
GSMG0006395	Mdh1	1.25657	0.0119782	0.119797	chr11:21556692-21571934	malate dehydrogenase 1, NAD (soluble)	---	211478	168297
GSMG0006398	Ehbp1	-1.67477	0.000460186	0.0167988	chr11:22005825-22342294	EH domain binding protein 1	---	856.217	1433.82
GSMG0006422	Ahsa2	1.20949	0.0842178	0.378872	chr11:23487594-23498039	AHA1, activator of heat shock protein ATPase 2	---	1611.58	1331.77
GSMG0006425	0610010F05Rik	1.01165	0.890543	0.95482	chr11:23564949-23633633	RIKEN cDNA 0610010F05 gene	---	2691.77	2661.03
GSMG0006427	Pex13	1.23719	0.0119941	0.119894	chr11:23646479-23665960	peroxisomal biogenesis factor 13	ENSMUSG00000020283	2210.5	1786.64
GSMG0006430	---	-1.10374	0.554641	0.869147	chr11:23860150-23861681	---	---	129.893	143.479
GSMG0006431	Papolg	1.06068	0.583561	0.892193	chr11:23862647-23895270	poly(A) polymerase gamma	ENSMUSG00000020273	951.447	897.121
GSMG0006432	---	1.03304	0.909278	0.964253	chr11:24036470-24037595	---	---	55.1213	53.2462
GSMG0006433	---	-1.48707	0.174825	0.572563	chr11:24048955-24075055	---	---	28.5282	42.3803
GSMG0006434	---	-1.19255	0.236144	0.667617	chr11:24075074-24078036	---	---	251.338	299.433
GSMG0006442	---	1.09425	0.653607	0.905642	chr11:26386135-26387435	---	---	170.671	156.332
GSMG0006443	Vrk2	1.16725	0.563405	0.876524	chr11:26471401-26593924	vaccinia related kinase 2	---	63.4745	54.5287
GSMG0006448	Ccdc85a	1.2011	0.0901245	0.394997	chr11:28385684-28584329	coiled-coil domain containing 85A	---	1066.17	888.044
GSMG0006449	---	-1.02186	0.892465	0.955771	chr11:29170817-29173562	---	---	177.1	181.202
GSMG0006451	Cfap36	1.19545	0.0128565	0.124661	chr11:29221536-29247308	cilia and flagella associated protein 36	ENSMUSG00000020462	8959.04	7493.96
GSMG0006460	Sptbn1	-2.34771	2.13624e-07	0.000100607	chr11:30099396-30268177	spectrin beta, non-erythrocytic 1	---	9280.05	21786.7
GSMG0006467	---	-1.12921	0.257101	0.689669	chr11:30500863-30505424	---	---	1281.97	1447.2
GSMG0006471	Erlec1	1.03028	0.682445	0.905642	chr11:30929784-30954141	endoplasmic reticulum lectin 1	ENSMUSG00000020311	3151.71	3058.94
GSMG0006473	Chac2	1.3335	0.0181695	0.153417	chr11:30976707-30986365	ChaC, cation transport regulator 2	---	1452.39	1089.06
GSMG0006475	Stc2	-1.45874	0.00524897	0.0712369	chr11:31357986-31370061	stanniocalcin 2	ENSMUSG00000020303	437.768	638.893
GSMG0006476	Bod1	1.22569	0.0543322	0.29326	chr11:31665145-31671919	biorientation of chromosomes in cell division 1	ENSMUSG00000044502	5321.84	4341.89
GSMG0006483	Nprl3	1.07196	0.446515	0.833392	chr11:32225628-32267707	nitrogen permease regulator-like 3	---	1909.32	1780.93
GSMG0006491	---	1.11532	0.352841	0.777863	chr11:33150509-33151450	---	---	648.876	581.548
GSMG0006492	Npm1	1.23605	0.00945333	0.103036	chr11:33152499-33163206	nucleophosmin 1	---	6993.82	5658.14
GSMG0006494	Ranbp17	-1.03313	0.827726	0.944886	chr11:33211794-33520683	RAN binding protein 17	ENSMUSG00000040594	173.77	179.944
GSMG0006498	Kcnip1	1.01079	0.940562	0.98007	chr11:33629339-33993194	Kv channel-interacting protein 1	---	226.287	224.293
GSMG0006514	Fbll1	1.09104	0.461185	0.843217	chr11:35797381-35798884	fibrillarin-like 1	ENSMUSG00000051062	6815.43	6247
GSMG0006515	Rars	1.15343	0.0667238	0.331507	chr11:35808381-35834528	arginyl-tRNA synthetase	ENSMUSG00000018848	10262.4	8896.74
GSMG0006516	Wwc1	-1.88817	3.21942e-06	0.000752486	chr11:35838399-35980599	WW, C2 and coiled-coil domain containing 1	ENSMUSG00000018849	1336.79	2524.44
GSMG0006546	Mat2b	1.46503	0.00070934	0.0220517	chr11:40679316-40695203	methionine adenosyltransferase II, beta	---	25397.8	17336
GSMG0006548	Ccng1	1.27432	0.0103353	0.108919	chr11:40748554-40755286	cyclin G1	ENSMUSG00000020326	2452.12	1923.87
GSMG0006549	Gabrg2	1.24241	0.0255956	0.18835	chr11:41910190-42000857	gamma-aminobutyric acid (GABA) A receptor, subunit gamma 2	---	11884.8	9565.77
GSMG0006553	Gabra1	1.01985	0.792872	0.931021	chr11:42130945-42182931	gamma-aminobutyric acid (GABA) A receptor, subunit alpha 1	---	30420.1	29827.5
GSMG0006559	Pttg1	1.36	0.00304676	0.0525055	chr11:43420244-43426251	pituitary tumor-transforming gene 1	---	3868.23	2844.02
GSMG0006563	Ttc1	1.1339	0.144222	0.517546	chr11:43729512-43748008	tetratricopeptide repeat domain 1	ENSMUSG00000041278	2825.77	2491.32
GSMG0006564	Adra1b	-1.00433	0.972223	0.99042	chr11:43774605-43901237	adrenergic receptor, alpha 1b	---	529.305	531.254
GSMG0006565	Ublcp1	1.16114	0.0217101	0.170876	chr11:44454572-44470548	ubiquitin-like domain containing CTD phosphatase 1	ENSMUSG00000041231	1735.67	1494.26
GSMG0006572	Lsm11	-1.22122	0.0375986	0.235956	chr11:45928269-45944936	U7 snRNP-specific Sm-like protein LSM11	ENSMUSG00000044847	1372.27	1675.49
GSMG0006573	Thg1l	1.22276	0.124403	0.474658	chr11:45945305-45955503	tRNA-histidine guanylyltransferase 1-like (S. cerevisiae)	---	372.841	305.035
GSMG0006574	Nipal4	1.04046	0.836001	0.947017	chr11:46148155-46166360	NIPA-like domain containing 4	ENSMUSG00000020411	80.5621	77.6851
GSMG0006575	Cyfip2	-1.20955	0.214744	0.636486	chr11:46193850-46312860	cytoplasmic FMR1 interacting protein 2	---	33952.4	41067.1
GSMG0006597	Trim41	1.08199	0.398453	0.793776	chr11:48806404-48817391	tripartite motif-containing 41	ENSMUSG00000040365	498.751	460.378
GSMG0006599	Irgm1	-1.21183	0.0373234	0.234905	chr11:48861968-48871686	immunity-related GTPase family M member 1	---	427.94	518.183
GSMG0006610	Cnot6	-1.18658	0.0854614	0.382349	chr11:49671497-49712722	CCR4-NOT transcription complex, subunit 6	---	1275.94	1513.69
GSMG0006611	Sqstm1	-1.01815	0.823797	0.944886	chr11:50199366-50210820	sequestosome 1	---	20037.7	20401.6
GSMG0006614	Maml1	-1.30971	0.0185788	0.155376	chr11:50255634-50292336	mastermind like transcriptional coactivator 1	ENSMUSG00000050567	593.493	777.279
GSMG0006617	Canx	1.08692	0.376367	0.793776	chr11:50293955-50325673	calnexin	---	20913.8	19241
GSMG0006619	Rufy1	-1.15317	0.200002	0.6136	chr11:50389289-50431129	RUN and FYVE domain containing 1	ENSMUSG00000020375	1428.24	1646.98
GSMG0006622	Zfp354c	-1.0207	0.780971	0.926705	chr11:50811085-50827731	zinc finger protein 354C	ENSMUSG00000044807	2680.41	2735.66
GSMG0006623	Zfp879	1.07267	0.645005	0.905642	chr11:50832034-50841554	zinc finger protein 879	---	135.747	126.05
GSMG0006624	Zfp454	-1.02434	0.805759	0.938466	chr11:50872718-50887510	zinc finger protein 454	ENSMUSG00000048728	338.592	346.477
GSMG0006625	Zfp2	1.03775	0.716087	0.905642	chr11:50898713-50916176	zinc finger protein 2	---	1412.64	1360.52
GSMG0006626	Zfp354b	-1.36099	0.0228832	0.176283	chr11:50921786-50931637	zinc finger protein 354B	ENSMUSG00000020335	162.595	221.461
GSMG0006634	Hnrnpab	1.17997	0.0333935	0.220855	chr11:51596595-51606881	heterogeneous nuclear ribonucleoprotein A/B	---	18551.3	15721.7
GSMG0006635	Rmnd5b	1.09096	0.376293	0.793776	chr11:51623672-51635896	required for meiotic nuclear division 5 homolog B	ENSMUSG00000001054	3245.26	2974.51
GSMG0006637	N4bp3	1.10988	0.461841	0.843976	chr11:51643063-51651073	NEDD4 binding protein 3	ENSMUSG00000001053	638.7	575.369
GSMG0006638	0610009B22Rik	1.48088	0.000500924	0.0177916	chr11:51685384-51688655	RIKEN cDNA 0610009B22 gene	---	3969.79	2680.83
GSMG0006639	Sec24a	-1.22866	0.0994274	0.419654	chr11:51692263-51763636	Sec24 related gene family, member A (S. cerevisiae)	---	281.802	345.637
GSMG0006640	Jade2	-1.23519	0.0610896	0.313945	chr11:51813448-51857668	jade family PHD finger 2	ENSMUSG00000020387	760.28	938.537
GSMG0006642	Ube2b	1.3687	0.00600553	0.0783052	chr11:51985138-52000786	ubiquitin-conjugating enzyme E2B	---	29790.1	21765.1
GSMG0006643	---	1.03445	0.835045	0.946652	chr11:52097312-52098590	---	---	153.485	148.181
GSMG0006653	Hspa4	-1.28525	0.0256895	0.188864	chr11:53259814-53300479	heat shock protein 4	ENSMUSG00000020361	7699.46	9895.51
GSMG0006655	Uqcrq	1.39437	0.0230101	0.176829	chr11:53427922-53430831	ubiquinol-cytochrome c reductase, complex III subunit VII	---	27153.5	19473.8
GSMG0006658	Sowaha	-1.2105	0.316845	0.750602	chr11:53476579-53480195	sosondowah ankyrin repeat domain family member A	ENSMUSG00000044352	1888.32	2286.06
GSMG0006660	---	-1.0421	0.789169	0.92916	chr11:53482411-53487348	---	---	367.063	383.244
GSMG0006661	A430108G06Rik	-1.01787	0.914979	0.966887	chr11:53564654-53567313	RIKEN cDNA A430108G06 gene	---	150.148	152.68
GSMG0006668	Slc22a5	1.1546	0.373103	0.792915	chr11:53864546-53891703	solute carrier family 22 (organic cation transporter), member 5	ENSMUSG00000018900	193.277	167.094
GSMG0006671	Slc22a4	-1.25251	0.120941	0.467439	chr11:53983117-54028104	solute carrier family 22 (organic cation transporter), member 4	ENSMUSG00000020334	139.054	174.12
GSMG0006678	Cdc42se2	1.41052	0.000696226	0.0217512	chr11:54717415-54787703	CDC42 small effector 2	ENSMUSG00000052298	22523.3	15968.1
GSMG0006680	Lyrm7	1.05329	0.530333	0.851003	chr11:54826866-54862261	LYR motif containing 7	ENSMUSG00000020268	442.818	420.488
GSMG0006681	Tnip1	-1.37028	0.0353749	0.228266	chr11:54910785-54962940	TNFAIP3 interacting protein 1	---	458.683	628.881
GSMG0006683	Anxa6	-1.10291	0.326335	0.750602	chr11:54978953-55033471	annexin A6	---	14522.5	16016.6
GSMG0006684	Ccdc69	1.26592	0.246558	0.678526	chr11:55049731-55078132	coiled-coil domain containing 69	ENSMUSG00000049588	85.5771	67.9089
GSMG0006689	Sparc	-1.58087	0.00371952	0.0586285	chr11:55394159-55420080	secreted acidic cysteine rich glycoprotein	---	152.392	239.968
GSMG0006690	Atox1	1.45118	0.000505458	0.0178803	chr11:55446639-55461208	antioxidant 1 copper chaperone	ENSMUSG00000018585	8467.6	5835.17
GSMG0006694	Fam114a2	1.00822	0.940808	0.980255	chr11:57482990-57518644	family with sequence similarity 114, member A2	---	1883.72	1868.29
GSMG0006698	2010001A14Rik	1.76014	0.0150522	0.136911	chr11:57795499-57801467	RIKEN cDNA 2010001A14 gene	ENSMUSG00000087165	93.2961	52.9128
GSMG0006702	Gemin5	-1.3351	0.0440319	0.259781	chr11:58120001-58168539	gem nuclear organelle associated protein 5	---	618.1	825.476
GSMG0006703	Zfp672	1.23084	0.029233	0.204437	chr11:58315110-58330340	zinc finger protein 672	---	2717.83	2208.03
GSMG0006714	Zfp39	-1.30083	0.0463641	0.267338	chr11:58888153-58904226	zinc finger protein 39	ENSMUSG00000037001	550.384	716.258
GSMG0006715	Rnf187	1.18966	0.0692298	0.337945	chr11:58932288-58938918	ring finger protein 187	ENSMUSG00000020496	102846	86449.7
GSMG0006716	H2bu1-ps	1.23279	0.231541	0.661773	chr11:58954048-58954512	H2B.U histone 1, pseudogene	ENSMUSG00000080712	180.399	146.588
GSMG0006719	---	1.22364	0.0857332	0.383058	chr11:58965748-58978086	---	---	519.967	425.017
GSMG0006725	Guk1	1.44758	0.00524035	0.0711809	chr11:59183855-59191952	guanylate kinase 1	---	10877.6	7514.45
GSMG0006726	2610507I01Rik	-1.01054	0.92736	0.973194	chr11:59197793-59202431	RIKEN cDNA 2610507I01 gene	---	1565.8	1581.85
GSMG0006728	Arf1	1.19837	0.0383844	0.238939	chr11:59211407-59228267	ADP-ribosylation factor 1	---	73396.5	61247.3
GSMG0006731	Snap47	1.1964	0.0284155	0.201347	chr11:59407134-59450034	synaptosomal-associated protein, 47	ENSMUSG00000009894	65035.2	54359.1
GSMG0006733	Zfp867	-1.02176	0.866975	0.948986	chr11:59461197-59472475	zinc finger protein 867	ENSMUSG00000054519	492.565	504.116
GSMG0006734	Zkscan17	-1.19825	0.11201	0.447899	chr11:59485523-59506880	zinc finger with KRAB and SCAN domains 17	---	860.135	1031.05
GSMG0006741	Pld6	1.05223	0.775895	0.924813	chr11:59783893-59787657	phospholipase D family, member 6	---	143.312	136.208
GSMG0006742	Flcn	-1.0655	0.534596	0.854498	chr11:59791408-59810039	folliculin	---	1329.62	1415.96
GSMG0006743	Cops3	1.21683	0.0225767	0.175033	chr11:59817797-59839767	COP9 signalosome subunit 3	ENSMUSG00000019373	8995.58	7392.58
GSMG0006744	Med9os	1.92586	0.0560501	0.29849	chr11:59946624-59948147	mediator complex subunit 9, opposite strand	ENSMUSG00000085260	49.942	26.0252
GSMG0006745	Rasd1	1.23141	0.383032	0.793776	chr11:59963185-59965044	RAS, dexamethasone-induced 1	ENSMUSG00000049892	73.8125	59.7288
GSMG0006746	Pemt	1.32106	0.0366058	0.232297	chr11:59970615-60046489	phosphatidylethanolamine N-methyltransferase	---	274.126	207.742
GSMG0006748	Srebf1	-1.23713	0.0302601	0.208069	chr11:60199084-60222581	sterol regulatory element binding transcription factor 1	---	1197.72	1481.9
GSMG0006749	Tom1l2	-1.09916	0.174152	0.571343	chr11:60226714-60352905	target of myb1-like 2 (chicken)	---	35926.1	39488.8
GSMG0006751	Atpaf2	1.16786	0.0548387	0.295182	chr11:60400624-60417044	ATP synthase mitochondrial F1 complex assembly factor 2	ENSMUSG00000042709	2319.09	1986.1
GSMG0006756	Flii	-1.16068	0.209901	0.629464	chr11:60714149-60727263	flightless I actin binding protein	ENSMUSG00000002812	3073.86	3567.99
GSMG0006760	Tmem11	1.37382	0.00242999	0.0455212	chr11:60864452-60879038	transmembrane protein 11	---	5068.63	3689.33
GSMG0006762	Natd1	-1.04215	0.713485	0.905642	chr11:60902246-60913792	N-acetyltransferase domain containing 1	ENSMUSG00000018931	930.661	970.353
GSMG0006764	Usp22	-1.13916	0.0599184	0.310388	chr11:61151781-61175060	ubiquitin specific peptidase 22	ENSMUSG00000042506	25788.1	29377.7
GSMG0006766	Aldh3a2	-1.03787	0.650571	0.905642	chr11:61223417-61267528	aldehyde dehydrogenase family 3, subfamily A2	---	2055.55	2133.36
GSMG0006769	Rnf112	-1.31467	0.0437934	0.259163	chr11:61448417-61454005	ring finger protein 112	---	1918.66	2522.92
GSMG0006770	Mapk7	-1.19368	0.192116	0.601055	chr11:61488812-61494266	mitogen-activated protein kinase 7	---	528.608	631.316
GSMG0006774	Epn2	-1.11355	0.203412	0.618793	chr11:61515883-61579688	epsin 2	---	2665.08	2967.94
GSMG0006776	Prpsap2	1.12367	0.202309	0.617196	chr11:61729650-61762088	phosphoribosyl pyrophosphate synthetase-associated protein 2	---	2148.15	1911.82
GSMG0006777	Ulk2	-1.16344	0.0996891	0.420365	chr11:61775598-61855093	unc-51 like kinase 2	ENSMUSG00000004798	5435.48	6323.9
GSMG0006780	---	-1.11178	0.433158	0.82184	chr11:61864568-61868058	---	---	2228.21	2476.83
GSMG0006781	Akap10	-1.06969	0.553109	0.867909	chr11:61871307-61930259	A kinase (PRKA) anchor protein 10	ENSMUSG00000047804	1839.4	1967.29
GSMG0006785	Zswim7	1.55192	0.00247095	0.0459449	chr11:62267226-62281395	zinc finger SWIM-type containing 7	ENSMUSG00000014243	1153.09	743.113
GSMG0006786	Ncor1	-2.39523	0.000676302	0.0213187	chr11:62316426-62457806	nuclear receptor co-repressor 1	---	4937.02	11825.5
GSMG0006790	Cenpv	1.31569	0.00976142	0.105088	chr11:62524945-62539263	centromere protein V	ENSMUSG00000018509	2848.47	2164.83
GSMG0006794	Lrrc75a	-1.73635	0.0380855	0.237895	chr11:62604886-62648523	leucine rich repeat containing 75A	ENSMUSG00000046417	236.307	410.271
GSMG0006795	Zfp287	-1.0498	0.81586	0.944305	chr11:62700356-62731906	zinc finger protein 287	ENSMUSG00000005267	133.768	140.693
GSMG0006797	Zfp286	1.23189	0.0865752	0.384993	chr11:62778387-62789468	zinc finger protein 286	---	394.845	320.775
GSMG0006803	Hs3st3b1	1.03452	0.815652	0.944215	chr11:63884693-63922291	heparan sulfate (glucosamine) 3-O-sulfotransferase 3B1	ENSMUSG00000070407	1330.93	1285.96
GSMG0006806	Cox10	1.02185	0.777949	0.925234	chr11:63962627-64079472	heme A:farnesyltransferase cytochrome c oxidase assembly factor 10	ENSMUSG00000042148	3574.5	3498.35
GSMG0006809	F930015N05Rik	-1.65269	0.0152762	0.138314	chr11:64433135-64436674	RIKEN cDNA F930015N05 gene	---	121.195	200.035
GSMG0006812	Arhgap44	-1.12585	0.179342	0.58011	chr11:65002040-65162961	Rho GTPase activating protein 44	---	3445.75	3879.47
GSMG0006819	Map2k4	1.03983	0.667616	0.905642	chr11:65688244-65788359	mitogen-activated protein kinase kinase 4	ENSMUSG00000033352	5176	4977.18
GSMG0006827	Shisa6	-1.35113	0.0373749	0.235019	chr11:66211725-66526127	shisa family member 6	---	8916.91	12047.8
GSMG0006830	Adprm	1.40375	0.000856972	0.024727	chr11:67037880-67052618	ADP-ribose/CDP-alcohol diphosphatase, manganese dependent	ENSMUSG00000020910	913.894	651.114
GSMG0006846	Ndel1	1.12814	0.116258	0.457464	chr11:68821432-68871858	nudE neurodevelopment protein 1 like 1	ENSMUSG00000018736	15011.2	13305.9
GSMG0006848	Arhgef15	1.21151	0.154585	0.537733	chr11:68943155-68956887	Rho guanine nucleotide exchange factor (GEF) 15	ENSMUSG00000052921	384.213	317.649
GSMG0006857	Cntrob	-1.17886	0.119269	0.463918	chr11:69299496-69323873	centrobin, centrosomal BRCA2 interacting protein	ENSMUSG00000032782	823.534	971.479
GSMG0006864	Kdm6b	-1.86086	2.24601e-05	0.0026947	chr11:69398535-69416194	KDM1 lysine (K)-specific demethylase 6B	ENSMUSG00000018476	350.754	653.609
GSMG0006868	Efnb3	1.14893	0.165228	0.557939	chr11:69554093-69560237	ephrin B3	ENSMUSG00000003934	17669	15378.8
GSMG0006869	Wrap53	1.1833	0.0552569	0.296023	chr11:69561754-69580256	WD repeat containing, antisense to Trp53	ENSMUSG00000041346	1031.81	871.856
GSMG0006872	Atp1b2	-1.1526	0.145619	0.520312	chr11:69599729-69605961	ATPase, Na+/K+ transporting, beta 2 polypeptide	ENSMUSG00000041329	1930.38	2225.57
GSMG0006874	Mpdu1	1.29526	0.0139186	0.130827	chr11:69656697-69662649	mannose-P-dolichol utilization defect 1	---	3279.65	2532.09
GSMG0006875	Cd68	1.42555	0.0182721	0.15393	chr11:69664213-69666170	CD68 antigen	ENSMUSG00000018774	343.706	240.812
GSMG0006876	Eif4a1	1.37621	9.77781e-05	0.00665595	chr11:69666936-69672423	eukaryotic translation initiation factor 4A1	ENSMUSG00000059796	12414.8	9020.57
GSMG0006877	Senp3	1.10386	0.263317	0.697507	chr11:69673110-69682086	SUMO/sentrin specific peptidase 3	---	7685	6962.21
GSMG0006879	Polr2a	-1.3903	0.0683594	0.335618	chr11:69733997-69758637	polymerase (RNA) II (DNA directed) polypeptide A	ENSMUSG00000005198	207.596	289.096
GSMG0006885	Tmem102	1.2054	0.18767	0.594493	chr11:69803332-69805625	transmembrane protein 102	ENSMUSG00000089876	797.304	661.744
GSMG0006888	Nlgn2	-1.13546	0.263029	0.696979	chr11:69823122-69837786	neuroligin 2	---	20463.1	23235.5
GSMG0006893	Eif5a	1.3312	0.00614441	0.0792955	chr11:69916712-69921958	eukaryotic translation initiation factor 5A	---	76322.2	57333.2
GSMG0006895	Elp5	1.39322	0.000328689	0.0134867	chr11:69968228-69981252	elongator acetyltransferase complex subunit 5	ENSMUSG00000018565	14220.5	10206.7
GSMG0006897	Acadvl	1.0221	0.803503	0.93719	chr11:70010183-70015428	acyl-Coenzyme A dehydrogenase, very long chain	ENSMUSG00000018574	2281.46	2232.07
GSMG0006898	Slc16a13	1.04676	0.765965	0.920178	chr11:70216790-70220995	solute carrier family 16 (monocarboxylic acid transporters), member 13	ENSMUSG00000044367	222.521	212.955
GSMG0006905	Pelp1	-1.06278	0.457771	0.840743	chr11:70392882-70410032	proline, glutamic acid and leucine rich protein 1	ENSMUSG00000018921	3033.25	3224.26
GSMG0006906	Camta2	-1.23873	0.0167046	0.145889	chr11:70660238-70688105	calmodulin binding transcription activator 2	---	11002.2	13629.2
GSMG0006910	Chrne	1.35134	0.156268	0.541282	chr11:70614883-70619194	cholinergic receptor, nicotinic, epsilon polypeptide	---	84.8244	62.6891
GSMG0006911	Slc25a11	1.19156	0.0204877	0.164789	chr11:70644019-70647039	solute carrier family 25 (mitochondrial carrier oxoglutarate carrier), member 11	ENSMUSG00000014606	26106.7	21909.6
GSMG0006912	Pfn1	1.26684	0.012814	0.124525	chr11:70651849-70654650	profilin 1	ENSMUSG00000018293	22982.3	18141.2
GSMG0006913	Spag7	1.20622	0.00229839	0.0442215	chr11:70663769-70669416	sperm associated antigen 7	ENSMUSG00000018287	12045.2	9986.07
GSMG0006914	Inca1	1.15366	0.26963	0.703857	chr11:70688361-70700155	inhibitor of CDK, cyclin A1 interacting protein 1	---	185.147	160.191
GSMG0006919	Nup88	1.06622	0.347281	0.771915	chr11:70943058-70969974	nucleoporin 88	---	2998.44	2812.06
GSMG0006920	C1qbp	1.24088	0.00675105	0.0839002	chr11:70977807-70983026	complement component 1, q subcomponent binding protein	ENSMUSG00000018446	12370	9968.32
GSMG0006921	Dhx33	-1.04057	0.742025	0.908432	chr11:70984091-71004438	DEAH (Asp-Glu-Ala-His) box polypeptide 33	ENSMUSG00000040620	870.326	905.845
GSMG0006922	Derl2	1.39313	0.0341299	0.223616	chr11:71007164-71019841	Der1-like domain family, member 2	---	518.228	372.168
GSMG0006923	6330403K07Rik	1.38252	0.0107388	0.111693	chr11:71031942-71033617	RIKEN cDNA 6330403K07 gene	ENSMUSG00000018451	78278.3	56620.1
GSMG0006931	Pitpnm3	-1.4436	0.00594279	0.0777459	chr11:72047530-72135889	PITPNM family member 3	---	980.138	1415.38
GSMG0006932	4933427D14Rik	-1.79801	0.00892683	0.0992896	chr11:72153929-72207482	RIKEN cDNA 4933427D14 gene	ENSMUSG00000107877	224.732	403.803
GSMG0006933	Med31	1.44007	0.000288746	0.0125481	chr11:72211726-72215592	mediator complex subunit 31	ENSMUSG00000020801	1815.02	1260.41
GSMG0006936	Tekt1	-1.17722	0.590124	0.896331	chr11:72344717-72362443	tektin 1	---	87.7089	103.426
GSMG0006938	Spns2	-1.07544	0.733403	0.905642	chr11:72451638-72489964	spinster homolog 2	ENSMUSG00000040447	254.788	274.135
GSMG0006941	Cyb5d2	1.26375	0.0270042	0.195121	chr11:72777233-72796045	cytochrome b5 domain containing 2	ENSMUSG00000057778	1682.57	1331.78
GSMG0006944	4732414G09Rik	1.21796	0.691826	0.905642	chr11:73015856-73018845	RIKEN cDNA 4732414G09 gene	ENSMUSG00000086943	26.8886	22.134
GSMG0006947	Emc6	1.41683	0.00665691	0.0833386	chr11:73175503-73177042	ER membrane protein complex subunit 6	---	5723.66	4039.91
GSMG0006948	Ctns	-1.16023	0.157715	0.543818	chr11:73183133-73199044	cystinosis, nephropathic	---	331.27	383.896
GSMG0006959	Rap1gap2	-1.1589	0.0549752	0.295417	chr11:74383378-74610917	RAP1 GTPase activating protein 2	---	10966.8	12709.8
GSMG0006971	Sgsm2	-1.39528	0.00107469	0.0282589	chr11:74849262-74897071	small G protein signaling modulator 2	ENSMUSG00000038351	3608.93	5036.17
GSMG0006974	Srr	-1.00761	0.925798	0.972515	chr11:74904027-74925950	serine racemase	---	3288.89	3313.71
GSMG0006979	Dph1 // Ovca2	1.1002	0.286987	0.718698	chr11:75175943-75190488	diphthamide biosynthesis 1 // candidate tumor suppressor in ovarian cancer 2	ENSMUSG00000038268,ENSMUSG00000078789	2619.47	2381.33
GSMG0006980	Rpa1	-1.04045	0.588572	0.895025	chr11:75300259-75348383	replication protein A1	---	5938.42	6178.41
GSMG0006982	Serpinf1	-1.15374	0.682847	0.905642	chr11:75409769-75422623	serine (or cysteine) peptidase inhibitor, clade F, member 1	ENSMUSG00000000753	48.8565	56.7055
GSMG0006984	Wdr81	-1.49212	0.000944876	0.0260193	chr11:75440944-75454717	WD repeat domain 81	ENSMUSG00000045374	900.844	1344.82
GSMG0006988	---	-1.29107	0.00947469	0.103221	chr11:75530277-75533072	---	---	659.986	852.771
GSMG0006993	Doc2b	-1.59069	0.00146888	0.0342565	chr11:75768270-75796060	double C2, beta	ENSMUSG00000020848	602.008	958.537
GSMG0006996	Rflnb	-1.05032	0.583078	0.891934	chr11:76019199-76027785	refilin B	ENSMUSG00000020846	2871.67	3016.69
GSMG0007001	Nxn	1.35398	0.0042175	0.0629987	chr11:76257226-76399141	nucleoredoxin	ENSMUSG00000020844	593.561	438.689
GSMG0007008	Abr	-1.18915	0.199845	0.613357	chr11:76416732-76577739	active BCR-related gene	---	16767.4	19938.7
GSMG0007013	Gosr1	1.01312	0.863756	0.948986	chr11:76726603-76763581	golgi SNAP receptor complex member 1	ENSMUSG00000010392	1153.41	1138.11
GSMG0007014	Cpd	-1.15154	0.337079	0.759314	chr11:76777208-76847008	carboxypeptidase D	ENSMUSG00000020841	4096.87	4717.33
GSMG0007018	Nsrp1	-1.41748	1.31823e-05	0.00192572	chr11:77044294-77078438	nuclear speckle regulatory protein 1	ENSMUSG00000037958	1028.33	1457.88
GSMG0007022	Ankrd13b	-1.2618	0.00522541	0.07107	chr11:77470485-77490042	ankyrin repeat domain 13b	ENSMUSG00000037907	1527.44	1927.86
GSMG0007024	Trp53i13	1.04936	0.705511	0.905642	chr11:77508099-77513273	transformation related protein 53 inducible protein 13	ENSMUSG00000044328	225.955	215.661
GSMG0007026	Taok1	-1.56289	0.00578555	0.0763518	chr11:77529162-77625322	TAO kinase 1	ENSMUSG00000017291	3912.58	6114.48
GSMG0007033	Dhrs13os	-1.03842	0.823637	0.944886	chr11:78030010-78032665	dehydrogenase/reductase (SDR family) member 13, opposite strand	ENSMUSG00000087050	102.385	106.567
GSMG0007034	Eral1	1.04607	0.51817	0.845039	chr11:78073377-78080383	Era (G-protein)-like 1 (E. coli)	ENSMUSG00000020832	1223.22	1169.56
GSMG0007036	Traf4	1.18511	0.282455	0.712949	chr11:78157311-78165590	TNF receptor associated factor 4	ENSMUSG00000017386	221.508	186.962
GSMG0007039	Rpl23a	1.52955	0.001299	0.0318676	chr11:78180935-78183584	ribosomal protein L23A	ENSMUSG00000058546	5585.99	3651.88
GSMG0007040	Supt6	-1.48063	0.00461527	0.0659856	chr11:78206749-78246343	SPT6, histone chaperone and transcription elongation factor	ENSMUSG00000002052	5602.49	8295.53
GSMG0007045	Sarm1	-1.04235	0.721615	0.905642	chr11:78472330-78497758	sterile alpha and HEAT/Armadillo motif containing 1	---	1430.36	1491.66
GSMG0007046	Tmem199	1.26483	0.0112855	0.115393	chr11:78507026-78512168	transmembrane protein 199	ENSMUSG00000051232	6461.26	5108.29
GSMG0007047	Tnfaip1	-1.06839	0.343688	0.767443	chr11:78522849-78536260	tumor necrosis factor, alpha-induced protein 1 (endothelial)	---	5825.15	6223.11
GSMG0007048	Tmem97	1.2856	0.0581706	0.304397	chr11:78541817-78550747	transmembrane protein 97	ENSMUSG00000037278	264.234	205.913
GSMG0007050	Nlk	-1.02249	0.786906	0.92826	chr11:78567170-78697425	nemo like kinase	ENSMUSG00000017376	6477.05	6622.01
GSMG0007061	Ksr1	-1.85012	1.23583e-05	0.00189299	chr11:79013441-79146475	kinase suppressor of ras 1	---	940.602	1740.89
GSMG0007064	Wsb1	-1.04444	0.726564	0.905642	chr11:79239381-79254695	WD repeat and SOCS box-containing 1	---	453.832	474.136
GSMG0007067	Omg	-1.02682	0.959582	0.988982	chr11:79500982-79504085	oligodendrocyte myelin glycoprotein	ENSMUSG00000049612	1271.54	1305.7
GSMG0007073	Utp6	1.09433	0.271308	0.706034	chr11:79932321-79962394	UTP6 small subunit processome component	ENSMUSG00000035575	2320.56	2120.14
GSMG0007076	Crlf3	1.31184	0.010585	0.110743	chr11:80046493-80080991	cytokine receptor-like factor 3	---	504.841	384.543
GSMG0007077	Tefm	1.45758	0.00540163	0.0728078	chr11:80136678-80142154	transcription elongation factor, mitochondrial	ENSMUSG00000046909	752.777	516.428
GSMG0007079	5730455P16Rik	-1.18812	0.148454	0.525144	chr11:80360492-80378016	RIKEN cDNA 5730455P16 gene	ENSMUSG00000057181	1387.31	1648.34
GSMG0007084	Myo1d	-1.2267	0.310459	0.747119	chr11:80482127-80780026	myosin ID	---	104.393	127.384
GSMG0007087	Asic2	-1.09552	0.354797	0.779505	chr11:80880163-81968409	acid-sensing (proton-gated) ion channel 2	---	2687.39	2943.86
GSMG0007098	Rffl	-1.41958	0.184114	0.588724	chr11:82803820-82871212	ring finger and FYVE like domain containing protein	---	70.0447	99.7415
GSMG0007101	Rad51d	1.00678	0.944931	0.982061	chr11:82871960-82890624	RAD51 paralog D	---	1141.35	1134.13
GSMG0007104	Nle1	1.10592	0.398074	0.793776	chr11:82900768-82908395	notchless homolog 1	ENSMUSG00000020692	652.531	590.29
GSMG0007115	Pex12	1.07854	0.552544	0.867498	chr11:83294645-83298978	peroxisomal biogenesis factor 12	---	331.64	307.412
GSMG0007123	Ccl3	1.03311	0.92778	0.973341	chr11:83647844-83649378	chemokine (C-C motif) ligand 3	ENSMUSG00000000982	32.7699	31.706
GSMG0007126	Dusp14	1.25528	0.0848966	0.380815	chr11:84048027-84068581	dual specificity phosphatase 14	---	5907.59	4705.92
GSMG0007127	Tada2a	1.03986	0.702491	0.905642	chr11:84078673-84129600	transcriptional adaptor 2A	ENSMUSG00000018651	720.35	692.43
GSMG0007130	Aatf	-1.17744	0.0907368	0.396004	chr11:84422856-84513528	apoptosis antagonizing transcription factor	ENSMUSG00000018697	889.49	1046.76
GSMG0007133	Lhx1	-1.82978	0.0959468	0.410064	chr11:84517975-84525537	LIM homeobox protein 1	ENSMUSG00000018698	30.7827	56.5783
GSMG0007135	Mrm1	1.00814	0.929732	0.974397	chr11:84813063-84819515	mitochondrial rRNA methyltransferase 1	ENSMUSG00000018405	1766.57	1752.43
[truncated: 11,606 more rows]

## Sheet: FPKM_OB
Gene expression (FPKM) in the olfactory bulb
FASTDB ID	Chromosome coordinates	Gene Symbol	Gene Name	Synonyms	Ensembl ID	Entrez ID	OB_KO1	OB_KO2	OB_KO3	OB_KO4	OB_KO5	OB_WT1	OB_WT2	OB_WT4	OB_WT5	OB_WT6
GSMG0000001	chr1:3073253-3074322	---	---	---	---	---	0	0	0	0	0	0	0	0	0	0
GSMG0000002	chr1:3680155-3681790	---	---	---	---	---	0.0164955	0.01113	0	0	0.023331	0.0200319	0.025613	0.0123712	0.0106936	0.011729
GSMG0000003	chr1:4496551-4499378	---	---	---	---	---	0	0	0	0	0	0	0	0	0	0
GSMG0000004	chr1:4785776-4786630	---	---	---	---	---	0	0	0	0	0	0	0	0	0	0
GSMG0000005	chr1:4807823-4849352	Lypla1	lysophospholipase 1	APT-1,Gm39587,LPL-I,P,Pla1a	---	18777	140.546	111.095	112.514	148.041	125.788	106.921	96.0729	113.031	109.349	109.472
GSMG0000006	chr1:4857694-4897906	Tcea1	transcription elongation factor A (SII) 1	S,S-II	---	21399	46.7199	33.0518	47.4603	45.3742	41.5204	35.6647	31.368	36.1766	36.5679	35.3317
GSMG0000007	chr1:4905751-4906861	---	---	---	---	---	0	0.038327	0	0.185734	0.0291786	0.0401338	0.0707073	0.0364449	0.0505508	0
GSMG0000008	chr1:4970856-4976820	---	---	---	---	---	0	0	0	0	0	0.0112575	0	0	0	0
GSMG0000009	chr1:5083086-5162549	Atp6v1h	ATPase, H+ transporting, lysosomal V1 subunit H	0710001F19Rik,AU022349,CGI-11,SFD,SFDalpha,SFDbeta,VMA13	---	108664	171.2	154.039	158.695	182.428	147.743	121.653	109.701	139.852	144.555	143.808
GSMG0000010	chr1:5156618-5158506	---	---	---	---	---	0	0	0	0	0	0	0	0	0.0198134	0
GSMG0000011	chr1:5588465-5606133	Oprk1	opioid receptor, kappa 1	K-OR-1,KOR,KOR-1,MSL-1,Op,Oprk2,R2,R21	---	18387	0	0.003871	0.161886	0.0255824	0	0.00891548	0.0178163	0.0129081	0.0238721	0.0856521
GSMG0000012	chr1:6214660-6276365	Rb1cc1	RB1-inducible coiled-coil 1	2900055E04Rik,5930404L04Rik,Cc1,Fip2,FIP200,LaXp,LaXp180	---	12421	2.72005	2.49534	1.57361	1.87566	1.91898	6.33011	5.16259	2.6969	2.20314	2.37847
GSMG0000013	chr1:6359331-6394731	Alkal1	ALK and LTK ligand 1	EG620393,Fam15,Fam150a	ENSMUSG00000087247	620393	1.21171	0.913814	0.805287	0.864322	1.34686	0.464599	0.703469	1.09723	1.1805	0.545433
GSMG0000014	chr1:6487229-6860940	St18	suppression of tumorigenicity 18	AV348974,mKIAA0535,Myt3,Nzf,NZF-3,Nzf3	---	240690	0.01529	0.0783666	0.0432041	0.0362159	0.0308799	0.0746319	0.047561	0.0695849	0.0256698	0.0435696
GSMG0000015	chr1:6797517-6799077	---	---	---	---	---	0	0	0	0	0	0	0	0	0	0
GSMG0000016	chr1:7088920-7173631	Pcmtd1	protein-L-isoaspartate (D-aspartate) O-methyltransferase domain containing 1	8430411F12Rik,A030012M09Rik	ENSMUSG00000051285	319263	18.5088	17.4539	15.6971	18.1891	16.8223	24.3112	20.0052	20.9942	18.3658	18.1512
GSMG0000017	chr1:7121111-7122463	---	---	---	---	---	0	0	0	0	0	0	0	0	0	0
GSMG0000018	chr1:7148110-7152137	---	---	---	---	---	0	0	0.00510829	0	0.00473631	0.0208153	0.0207982	0.00502283	0.0185784	0.00476207
GSMG0000019	chr1:7497967-7518149	---	---	---	---	---	0	0	0	0.0198694	0.000486939	0	0	0	0	0
GSMG0000020	chr1:8527780-8531313	---	---	---	---	---	0	0	0	0	0	0	0	0	0	0
GSMG0000021	chr1:8950310-8952422	---	---	---	---	---	0	0	0	0	0	0	0	0	0	0
GSMG0000022	chr1:9286922-9290180	---	---	---	---	---	0	0	0	0	0	0	0	0	0	0
GSMG0000023	chr1:9545407-9547457	Rrs1	ribosome biogenesis regulator 1	5730466A07Rik,AA415037,D1Ertd701,D1Ertd701e,Rrr	ENSMUSG00000061024	59014	9.12867	7.99788	8.44842	7.57574	8.46654	7.91191	9.19238	9.57052	9.34261	9.09253
GSMG0000024	chr1:9547948-9580675	Adhfe1	alcohol dehydrogenase, iron containing, 1	6330565B14Rik,Adh8,AI043035,HOT	ENSMUSG00000025911	76187	0.682152	0.77616	0.664599	0.766385	0.757552	0.932303	0.585037	0.602489	0.679761	0.591252
GSMG0000025	chr1:9601266-9627143	Vxn	vexin	3110035E14Rik,AI415019,AV164974,R7506,R75066	ENSMUSG00000067879	76982	0.0994245	0.128469	12.2319	4.34319	0.0842212	0.360381	8.96398	3.23069	1.51557	6.71841
GSMG0000026	chr1:9747646-9791922	1700034P13Rik	RIKEN cDNA 1700034P13 gene	---	---	73331	0.0908777	0.0204543	0.0291463	0.0544225	0.024349	0	0.0156361	0.120909	0.0161142	0.0359252
GSMG0000027	chr1:9798130-9903826	Sgk3	serum/glucocorticoid regulated kinase 3	2510015P22Rik,A330005P07Rik,Ci,Cisk,fy,fz	---	170755	3.15193	2.75789	2.34397	2.48665	3.0376	2.93892	2.72368	2.58232	2.2268	2.84701
GSMG0000029	chr1:9908638-9940954	Mcmdc2	minichromosome maintenance domain containing 2	6030422M02Rik	ENSMUSG00000046101	240697	0.102866	0.165338	0.231506	0.178497	0.175441	0.271514	0.249627	0.177641	0.157303	0.103949
GSMG0000030	chr1:10037987-10136768	Cspp1	centrosome and spindle pole associated protein 1	2310020J12Rik,4930413O22Rik,AA387550,BC055915,Cspp2,Cspp3	---	211660	1.13768	1.34189	1.13649	1.11842	1.42684	1.97584	2.06725	1.10116	1.92082	2.30994
GSMG0000033	chr1:10993463-11303682	Prex2	phosphatidylinositol-3,4,5-trisphosphate-dependent Rac exchange factor 2	6230420N16Rik,AI316880,AI553603,C030045D06Rik,D430013K02,Depdc,Depdc2,P-Rex2	ENSMUSG00000048960	109294	0.0509591	0.0532947	0.0276393	0.0372977	0.00721953	0.0712716	0.0765808	0.0495073	0.0529369	0.0513812
GSMG0000035	chr1:11414105-11975902	A830018L16Rik	RIKEN cDNA A830018L16 gene	---	---	320492	2.18394	1.99377	12.5629	6.42039	1.70614	3.03274	9.91283	6.06373	3.78837	8.24265
GSMG0000036	chr1:11416917-11419388	---	---	---	---	---	0	0	0	0	0	0	0	0	0	0
GSMG0000037	chr1:11500246-11503538	---	---	---	---	---	0	0	0	0	0	0.00636568	0	0	0	0
GSMG0000038	chr1:11704207-11706350	---	---	---	---	---	0	0	0	0	0	0	0	0	0	0
GSMG0000039	chr1:11845505-11847349	---	---	---	---	---	0	0	0	0	0	0	0	0	0	0
GSMG0000040	chr1:11877221-11880478	---	---	---	---	---	0	0	0	0	0	0	0	0	0	0
GSMG0000041	chr1:12667562-12673090	Gm17644	predicted gene, 17644	4932411L15	ENSMUSG00000097171	329096	0	0	0	0	0	0	0	0	0	0.00599652
GSMG0000042	chr1:12692430-12861192	Sulf1	sulfatase 1	AI467640,AW121680,mKIAA1077	---	240725	0.00997433	0.0599755	0.706344	0.133682	0.00707722	0.205802	0.720814	0.150503	0.104052	0.192955
GSMG0000043	chr1:12743779-12746074	---	---	---	---	---	0	0	0	0	0	0	0	0	0	0
GSMG0000044	chr1:13427447-13429315	---	---	---	---	---	0	0	0	0	0	0	0	0	0	0
GSMG0000045	chr1:13668771-13701723	Xkr9	X-linked Kx blood group related 9	Gm1620,XRG9	ENSMUSG00000067813	381246	0.0140323	0.0284041	0.0568461	0	0	0.0327094	0.0108942	0.0108724	0.0193752	0
GSMG0000046	chr1:14109213-14112819	---	---	---	---	---	0	0	0	0	0	0	0	0	0	0
GSMG0000047	chr1:14755454-14776931	---	---	---	---	---	0	0.00776757	0.177615	0.0247378	0.02619	0.015087	0.105522	0.051114	0.042448	0.120048
GSMG0000048	chr1:14788644-14792965	---	---	---	---	---	0	0	0	0.00795206	0	0	0	0	0	0
GSMG0000050	chr1:15364302-15365501	---	---	---	---	---	0	0	0	0	0	0	0	0	0	0
GSMG0000051	chr1:15450631-15452334	---	---	---	---	---	0	0.0641135	0	0.030265	0	0.0615262	0	0.0118772	0	0.0761025
GSMG0000052	chr1:15484231-15485346	---	---	---	---	---	0	0	0	0	0	0.0751779	0	0	0	0
GSMG0000053	chr1:15556248-15558337	---	---	---	---	---	0	0	0	0	0	0	0	0	0	0
GSMG0000054	chr1:15570583-15571242	---	---	---	---	---	0	0	0	0	0	0	0.0953199	0	0	0
GSMG0000055	chr1:15586383-15587926	---	---	---	---	---	0	0	0	0	0	0.00909252	0	0	0	0
GSMG0000057	chr1:15805645-15844052	Terf1	telomeric repeat binding factor 1	P,Pin2,Trbf,Trbf1,Trf,Trf1	---	21749	3.16142	2.19337	2.58274	2.55991	2.89579	3.13398	2.23074	2.64709	2.29983	2.60324
GSMG0000058	chr1:15853331-15856499	---	---	---	---	---	0	0	0	0.00377104	0	0.0321221	0.0132188	0.00638476	0.0227844	0.0060533
GSMG0000059	chr1:16105774-16132550	Rdh10	retinol dehydrogenase 10 (all-trans)	3110069K09Rik,4921506A21Rik,AI875664,AW549993,D1Ertd762,D1Ertd762e,m366,m366Asp	ENSMUSG00000025921	98711	3.3047	2.18981	2.55758	1.94277	3.16441	2.68904	3.76852	1.78538	2.48574	1.92115
GSMG0000060	chr1:16618560-16621541	---	---	---	---	---	0	0.012209	0.0966102	0.0633964	0.0703805	0.062282	0.0491681	0.034196	0.018823	0.0128661
GSMG0000061	chr1:16657550-16662278	D030040B21Rik	RIKEN cDNA D030040B21 gene	D030040B21	ENSMUSG00000097744	329101	0	0	0	0	0	0	0	0	0	0
GSMG0000062	chr1:16665191-16678275	Tmem70	transmembrane protein 70	1110020A09Rik,2210416J16Rik	---	70397	41.2156	32.281	45.8885	46.3834	42.795	27.6593	26.3859	36.9146	35.7776	33.0174
GSMG0000063	chr1:16688432-16709605	Ly96	lymphocyte antigen 96	ESO,ESOP-1,MD-2,MD2	---	17087	0.66094	0.739286	1.3224	1.61985	0.909756	1.15467	1.07342	1.19994	1.38992	1.29599
GSMG0000064	chr1:16930970-16931796	---	---	---	---	---	0	0	0	0	0	0	0	0	0	0
GSMG0000065	chr1:17098639-17100792	---	---	---	---	---	0	0	0.0429957	0.0199494	0	0.0778665	0.029176	0.00939476	0.0347493	0.0801634
GSMG0000066	chr1:17145362-17164268	Gdap1	ganglioside-induced differentiation-associated-protein 1	---	ENSMUSG00000025777	14545	60.5245	59.1365	51.8988	57.6844	53.65	62.9493	58.9595	47.7592	45.6091	46.2249
GSMG0000067	chr1:17168403-17173103	---	---	---	---	---	0	0	0.010214	0.034122	0.037881	0.0416203	0.124342	0.0401726	0.12048	0
GSMG0000068	chr1:17601900-17630938	Pi15	peptidase inhibitor 15	P24,P24TI,P25,P25TI,PI-15,Sug,SugarCrisp	ENSMUSG00000067780	94227	0	0.00263084	0	0	0	0.00302961	0.00605425	0	0	0.00277242
GSMG0000069	chr1:17727045-17766344	Crispld1	cysteine-rich secretory protein LCCL domain containing 1	Coc,Cocoacrisp,Lcrisp1	---	83691	0.0191776	0.00431324	0.160568	0.0203608	0.00452077	0.0695382	0.117046	0.0575309	0.0177329	0.0771093
GSMG0000070	chr1:19103021-19173948	Tfap2d	transcription factor AP-2, delta	Tcfap,Tcfap2d	ENSMUSG00000042596	226896	0.0915051	0.016634	3.5867	3.2221	0.0697371	0.295471	4.37285	1.75271	0.744213	3.08183
GSMG0000071	chr1:19208912-19238845	Tfap2b	transcription factor AP-2 beta	AI606113,AP-2(be,AP-2(beta),E130018K07Rik,Tcfap,Tcfap2b	---	21419	0	0.00882948	0	0	0	0.0135114	0.0101594	0	0.00605007	0
GSMG0000072	chr1:19614269-19616767	---	---	---	---	---	0	0	0	0	0	0	0	0	0	0
GSMG0000073	chr1:20356452-20392300	4930486I03Rik	RIKEN cDNA 4930486I03 gene	---	ENSMUSG00000089914	75028	0	0	0	0	0	0	0	0	0	0
GSMG0000075	chr1:20714276-20714743	---	---	---	---	---	0	0	0	0	0	0	0	0	0	0
GSMG0000076	chr1:20730904-20734496	Il17a	interleukin 17A	Ctl,Ctla,Ctla-8,Ctla8,Il,IL-,IL-17,IL-17A,Il17	ENSMUSG00000025929	16171	0	0	0	0	0	0	0	0	0	0
GSMG0000077	chr1:20890548-20939650	Paqr8	progestin and adipoQ receptor family member VIII	1700019B16Rik,3110001D06Rik	---	74229	2.51653	2.58107	2.03295	2.44578	2.55805	3.14979	2.89965	2.76871	2.5449	2.95894
GSMG0000078	chr1:20908826-20912060	---	---	---	---	---	0	0	0	0	0	0	0	0	0	0
GSMG0000079	chr1:20951626-20990841	Efhc1	EF-hand domain (C-terminal) containing 1	1700029F22Rik,mRib72,mRib72-1,myoc,myoclonin1	ENSMUSG00000041809	71877	0.257728	0.190745	0.243402	0.0750131	0.121482	0.485281	0.24561	0.137841	0.19165	0.19173
GSMG0000080	chr1:21166497-21187627	---	---	---	---	---	0.0726957	0.236353	0.441902	0.597209	0	0.321327	0.109313	0.361406	0.100829	0.276932
GSMG0000081	chr1:21218575-21230165	Tmem14a	transmembrane protein 14A	5730496E24Rik,C85783,PTD01,PTD011	---	75712	21.5789	15.0838	25.0522	19.8893	19.4339	12.1809	15.4549	17.4688	14.411	17.324
GSMG0000082	chr1:21234722-21236821	---	---	---	---	---	0	0	0	0	0	0	0	0.00376524	0.00891082	0
GSMG0000083	chr1:21240585-21265575	Gsta3	glutathione S-transferase, alpha 3	Gst2-,Gst2-3	---	14859	0.0168458	0.113664	0.0513956	0.0321221	0.0357397	0.083795	0.0234711	0.0379018	0.0833254	0.131533
GSMG0000087	chr1:21383556-21386384	Khdc1b	KH domain containing 1B	AU014713,AU015226,AU024076,AY238603,C85331,C86372,C88118,Khdc1,Khdc1c	ENSMUSG00000085079	98582	0	0	0	0	0	0	0	0	0	0
GSMG0000088	chr1:22898386-22905081	Gm7759	predicted gene 7759	EG665725	---	665725	0	0	0	0	0	0	0	0	0	0
GSMG0000091	chr1:23761753-23848593	B3gat2	beta-1,3-glucuronyltransferase 2 (glucuronosyltransferase S)	GlcA,GlcAT-S,Glcats	ENSMUSG00000026156	280645	0.78979	0.863672	1.16185	0.594564	0.607113	0.924563	0.674804	0.856302	0.867704	0.873001
GSMG0000092	chr1:24005503-24005894	---	---	---	---	---	0	0	0	0	0	0	0	0	0	0
GSMG0000093	chr1:24020087-24021597	---	---	---	---	---	0	0	0	0	0	0	0	0	0	0
GSMG0000094	chr1:24100625-24103424	---	---	---	---	---	0.125263	0.110525	0.308676	0.14493	0.149914	0.269528	0.0897689	0.252065	0.160376	0.0890672
GSMG0000095	chr1:24177610-24252738	Col9a1	collagen, type IX, alpha 1	Col9,Col9a-1	---	12839	0.0130559	0.0704955	0.015041	0	0.00929715	0.0749152	0.0814622	0.0393788	0.0257999	0.0139745
GSMG0000096	chr1:24441445-24444073	---	---	---	---	---	0	0	0	0	0	0	0	0	0	0
GSMG0000097	chr1:24586581-24766299	Lmbrd1	LMBR1 domain containing 1	0910001K20Rik,AV347960,LMBD1	---	68421	27.808	31.4298	29.5288	31.4389	28.4659	32.0082	27.9154	30.2439	27.2819	30.9361
GSMG0000098	chr1:24687458-24690244	---	---	---	---	---	0	0	0	0	0	0	0.00751565	0	0	0
GSMG0000099	chr1:25238376-25240849	---	---	---	---	---	0	0	0	0	0	0	0	0	0	0
GSMG0000100	chr1:25830430-25831878	Gm9884	predicted gene 9884	---	---	117981786	0.0102082	0	0	0.0520225	0.0433152	0	0.0156943	0.0153118	0	0.0145169
GSMG0000101	chr1:27884045-27902187	Gm5524	predicted gene 5524	AI875557,EG433281	ENSMUSG00000101514	433281	0	0	0	0	0	0	0	0	0	0
GSMG0000102	chr1:30872670-30873475	---	---	---	---	---	0	0	0	0	0	0	0	0	0	0
GSMG0000103	chr1:30875441-30878222	---	---	---	---	---	0	0	0	0	0	0	0.00752916	0	0	0
GSMG0000104	chr1:31117138-31150105	---	---	---	---	---	0	0	0	0	0.0391654	0	0	0	0	0
GSMG0000105	chr1:31176435-31204725	Lgsn	lengsin, lens protein with glutamine synthetase domain	Glul,Gluld1,L,le,lengsin,Lgs	ENSMUSG00000050217	266744	0	0	0	0	0	0	0	0	0	0
GSMG0000106	chr1:31222838-31224287	Dnaaf6	dynein axonemal assembly factor 6	4930521A18Rik,Pih1,Pih1d3	ENSMUSG00000026063	74708	0	0	0	0	0	0	0	0	0	0
GSMG0000107	chr1:32172722-32658569	Khdrbs2	KH domain containing, RNA binding, signal transduction associated 2	6330586C16Rik,mSLM-1,Slim1,SLM,Slm-1,Slm1,Tg(LRRK2*R1441G)135Cjli,TG-RP135	ENSMUSG00000026058	170771	2.74441	2.35596	2.82206	3.25204	3.12371	2.79463	2.76932	3.22652	2.68874	2.89475
GSMG0000108	chr1:32419416-32422110	---	---	---	---	---	0.0100112	0	0	0.0127546	0	0	0	0	0	0
GSMG0000109	chr1:32473757-32475541	---	---	---	---	---	0	0	0.0230617	0	0.0106912	0	0	0	0	0.0107494
GSMG0000110	chr1:32493092-32495721	---	---	---	---	---	0	0	0	0	0	0	0	0	0	0
GSMG0000111	chr1:32496444-32497988	---	---	---	---	---	0	0	0	0	0	0	0	0	0	0
GSMG0000112	chr1:32523826-32526917	---	---	---	---	---	0	0	0	0	0	0.00677963	0	0	0	0
GSMG0000113	chr1:32539028-32542455	---	---	---	---	---	0	0	0	0	0	0	0.00610989	0	0	0
GSMG0000114	chr1:32710179-32712648	---	---	---	---	---	0	0	0	0	0	0	0	0	0	4.85441e-05
GSMG0000115	chr1:33669823-33670712	1700001G17Rik	RIKEN cDNA 1700001G17 gene	---	ENSMUSG00000103746	67503	0.397302	0.439595	0.242358	0.724708	0.300364	0.593056	0.27819	0.336588	0.583743	0.358997
GSMG0000116	chr1:33719887-33742564	Rab23	RAB23, member RAS oncogene family	AW545388,opb,opb2	---	19335	6.34533	6.14509	4.75643	6.68384	5.81181	6.78319	6.97828	6.30138	6.70204	6.82274
GSMG0000117	chr1:33908225-34308662	Dst	dystonin	2310001O04Rik,a,A830042E19Rik,ah,athet,athetoid,AW554249,Bp,BP230,Bpag,Bpag1,BPAG1-n,dt,Macf,Macf2,mKIAA0728,nmf20,nmf203,nmf33,nmf339	---	13518	0.171369	0.428223	0.334709	0.209618	0.325582	2.43664	2.40271	0.602971	0.73512	0.817116
GSMG0000118	chr1:33922470-33924838	---	---	---	---	---	0	0	0	0	0	0	0	0	0	0
GSMG0000119	chr1:34018697-34020949	---	---	---	---	---	0	0	0	0	0	0	0.00929778	0	0	0
GSMG0000120	chr1:34032100-34033797	---	---	---	---	---	0	0	0	0	0	0	0	0	0	0
GSMG0000121	chr1:34236595-34238820	---	---	---	---	---	0	0	0	0	0	0.00941835	0	0.0042877	0	0
GSMG0000122	chr1:34439829-34445747	Imp4	IMP4, U3 small nucleolar ribonucleoprotein	AA409888,AV031295,D1Wsu40e	ENSMUSG00000026127	27993	16.3793	14.4148	20.3573	16.9741	16.3473	15.4764	18.6452	17.7993	16.1149	15.3257
GSMG0000123	chr1:34445788-34449310	---	---	---	---	---	0.875376	0.795	0.730799	0.894109	0.890913	1.27564	1.13437	1.05338	0.998204	0.893331
GSMG0000124	chr1:34459746-34475733	Ptpn18	protein tyrosine phosphatase, non-receptor type 18	FL,FLP1,HSC,HSCF,Ptp,PTP-,PTP-H,PTP-HSCF,PTP-K1,Ptpk1	ENSMUSG00000026126	19253	0	0.0072906	0.0374473	0.00970009	0.0666258	0	0	0.0280424	0.0226988	0.0232729
GSMG0000125	chr1:34498412-34503062	Prss39	protease, serine 39	Tes,Tesp1	ENSMUSG00000026125	21755	0	0	0	0	0	0	0	0	0	0
GSMG0000126	chr1:34535648-34544311	Cfc1	cripto, FRL-1, cryptic family 1	AV265756,b2b970C,b2b970Clo,cryp,cryptic	ENSMUSG00000026124	12627	0.0143837	0.0772478	0.174843	0.130989	0.160583	0.0560216	0.180132	0.197794	0.366327	0.277924
GSMG0000127	chr1:34579693-34590942	Amer3	APC membrane recruitment 3	9430069J07Rik,Fam123,Fam123c	ENSMUSG00000045174	211383	4.91055	7.56144	5.20864	5.24486	5.28933	9.29872	8.66413	7.04175	6.54044	7.1731
GSMG0000129	chr1:34740573-34741569	---	---	---	---	---	0	0	0	0	0	0	0	0	0	0
GSMG0000130	chr1:34757101-34759181	---	---	---	---	---	0	0	0	0	0	0	0	0	0	0
GSMG0000131	chr1:34823525-34826560	---	---	---	---	---	0	0	0	0	0	0	0	0	0	0
GSMG0000132	chr1:34849959-34879585	Plekhb2	pleckstrin homology domain containing, family B (evectins) member 2	2310009M15Rik,AU018239,evt-,evt-2,Evt2,Phd,Phdc	---	226971	510.749	506.263	457.793	475.714	473.667	315.298	292.293	447.751	451.144	421.369
GSMG0000133	chr1:35879844-35881119	---	---	---	---	---	0	0.0136813	0.254863	0.515906	0.168789	0	0.148238	0.282843	0.0662082	0.10167
GSMG0000134	chr1:36011071-36011894	---	---	---	---	---	0	0	0	0	0	0	0	0	0	0
GSMG0000135	chr1:36068379-36107310	Hs6st1	heparan sulfate 6-O-sulfotransferase 1	6OS,6Ost1	ENSMUSG00000045216	50785	12.4649	14.4833	12.7832	12.1526	12.4593	17.4323	18.5395	15.1198	14.7373	14.5468
GSMG0000136	chr1:36132041-36138746	---	---	---	---	---	0	0	0	0	0	0	0	0	0	0
GSMG0000137	chr1:36307733-36324029	Arid5a	AT rich interactive domain 5A (MRF1-like)	D430024K22Rik,Mrf,Mrf1	---	214855	7.21905	5.79135	4.05468	5.01953	5.53835	5.38253	4.48781	3.04033	4.15191	3.52088
GSMG0000138	chr1:36332707-36333421	---	---	---	---	---	0	0	0	0	0	0	0	0	0	0
GSMG0000139	chr1:36372190-36422110	Fer1l5	fer-1-like 5 (C. elegans)	4930533C12Rik	ENSMUSG00000037432	100534273	0	0	0	0	0	0.000163553	0	0.00558975	0.020573	0
GSMG0000140	chr1:36471597-36508778	Cnnm4	cyclin M4	5430430O18Rik,Acd,Acdp4	ENSMUSG00000037408	94220	6.0563	11.9206	7.70359	7.38572	10.3698	11.1108	7.48472	8.16278	8.42014	8.93534
GSMG0000141	chr1:36473952-36476110	---	---	---	---	---	0	0	0	0.0238838	0	0	0	0	0.0043336	0.00888641
GSMG0000142	chr1:36490153-36492986	---	---	---	---	---	0.00475999	0.0128468	0	0.0272898	0.0100987	0	0.00739097	0.0107096	0.00660212	0.0406146
GSMG0000143	chr1:36511867-36528237	Cnnm3	cyclin M3	Acd,Acdp3,Clp3,mACDP3	---	94218	4.13329	6.10817	4.0584	4.2663	4.7036	5.51926	6.11675	4.23498	5.41041	6.11809
GSMG0000145	chr1:36557700-36565613	---	---	---	---	---	0.247453	0.0939019	0.111583	0.170419	0.145387	0.368992	0.178238	0.255345	0.156964	0.216979
GSMG0000146	chr1:36691487-36693387	Cox5b	cytochrome c oxidase subunit 5B	---	ENSMUSG00000061518	12859	827.856	591.522	856.271	760.536	744.4	432.08	491.208	560.343	623.155	605.542
GSMG0000147	chr1:36714537-36757959	4933424G06Rik	RIKEN cDNA 4933424G06 gene	1700104I15Rik	---	71166	0.0905089	0.149019	0.213199	0.514359	0.2459	0.310124	0.250266	0.239182	0.33566	0.193913
GSMG0000148	chr1:36761798-36782820	Zap70	zeta-chain (TCR) associated protein kinase	mrtle,mur,S,Srk,ZAP-,ZAP-70	---	22637	1.11159	1.10834	0.60622	1.11996	1.06756	0.622674	0.680676	0.875609	0.798707	0.61691
GSMG0000151	chr1:37218278-37263383	Cnga3	cyclic nucleotide gated channel alpha 3	CNG,CNG3	---	12790	0.0899004	0.168299	0.125535	0.172026	0.158943	0.23851	0.100909	0.112204	0.171358	0.170461
GSMG0000152	chr1:37299838-37410740	Inpp4a	inositol polyphosphate-4-phosphatase, type I	107kD,107kDa,9630012D15,D130048C09Rik,R74740	---	269180	7.52387	14.3358	7.41524	7.97198	10.0446	27.5832	35.6266	12.5437	13.3491	13.5013
GSMG0000154	chr1:37417938-37418481	---	---	---	---	---	0	0	0.0100355	0.0182296	0.0304006	0.00511161	0.0129475	0	0.13282	0.167038
GSMG0000155	chr1:37430139-37439124	Unc50	unc-50 homolog	1110002A21Rik,GMH1,UNCL,URP	---	67387	46.5989	34.0074	56.3085	52.7136	48.4667	32.5386	34.0157	38.6405	41.5979	38.4499
GSMG0000156	chr1:37660720-37662647	---	---	---	---	---	0	0	0	0	0	0	0	0.0225119	0	0
GSMG0000157	chr1:37865297-37871388	---	---	---	---	---	0.0523861	0.0591254	0.222276	0.0926675	0.0801053	0.0437967	0.29229	0.0916306	0.130503	0.103544
GSMG0000158	chr1:37871738-37877387	Lipt1	lipoyltransferase 1	EG623661	ENSMUSG00000037216	623661	1.03035	1.03403	1.43409	0.899579	1.16473	0.921669	1.04331	0.939643	0.938723	0.942205
GSMG0000159	chr1:37890477-37898338	Mrpl30	mitochondrial ribosomal protein L30	2310001L22Rik,L30mt,MRP-,MRP-L28,MRP-L30,Rpm,Rpml28	---	107734	94.5273	76.6103	107.534	102.839	88.7785	56.5889	67.5564	72.5493	78.105	77.4406
GSMG0000160	chr1:37933595-37954136	---	---	---	---	---	0	0	0	0	0	0	0	0	0	0.0144368
GSMG0000161	chr1:37998009-38055579	Eif5b	eukaryotic translation initiation factor 5B	A030003E17Rik,BC018347,IF,IF2	ENSMUSG00000026083	226982	10.6846	13.1114	8.7817	7.18758	7.06606	15.5461	10.9954	9.97299	12.4763	10.9435
GSMG0000162	chr1:38013853-38016925	---	---	---	---	---	0	0	0	0	0	0	0	0	0	0
GSMG0000163	chr1:38132081-38159892	Gm5099	predicted gene 5099	EG329123	ENSMUSG00000102716	329123	0	0	0	0	0	0	0	0	0.00890254	0
GSMG0000165	chr1:38384303-38393974	---	---	---	---	---	0	0	0	0	0	0	0.0287355	0	0.00855618	0.0175452
GSMG0000166	chr1:38767183-38767686	---	---	---	---	---	0	0	0	0	0	0	0	0	0	0
GSMG0000167	chr1:38939149-38950278	Nms	neuromedin S	AB164466	---	433292	0	0.0365303	0	0.0147235	0.0576227	0.0209026	0.0209428	0.0203695	0	0.0382995
GSMG0000168	chr1:38987772-38997236	Pdcl3	phosducin-like 3	1110061A19Rik,C80025,Viaf1	ENSMUSG00000026078	68833	36.5097	27.1786	35.2413	33.4108	29.214	20.9337	26.12	28.0213	27.0603	29.5342
GSMG0000169	chr1:38992678-38994316	---	---	---	---	---	0	0	0	0	0	0.0127935	0	0.0123485	0	0
GSMG0000170	chr1:39194204-39363240	Npas2	neuronal PAS domain protein 2	bHLHe,bHLHe9,MO,MOP4	ENSMUSG00000026077	18143	0.62475	0.975888	2.47782	1.72883	0.883512	1.906	3.31325	2.17189	1.31206	2.41908
GSMG0000171	chr1:39367851-39371911	Rpl31	ribosomal protein L31	Dt,Dts	---	114641	67.6723	53.4587	74.1967	67.8954	66.2442	35.5909	46.4382	48.0591	53.8877	47.3861
GSMG0000172	chr1:39534992-39546875	Cnot11	CCR4-NOT transcription complex, subunit 11	2410015L18Rik,C40,D1Bwg0212e	ENSMUSG00000003135	52846	24.7588	19.8233	17.1806	19.6185	17.3103	23.4642	20.2273	18.9753	18.7183	16.815
GSMG0000173	chr1:39650176-39657390	---	---	---	---	---	0.760683	0.539925	0.996053	1.0185	0.581323	0.60104	1.017	0.922198	0.862311	0.872445
GSMG0000174	chr1:39900913-40026310	Map4k4	mitogen-activated protein kinase kinase kinase kinase 4	9430080K19Rik,AU043147,AU045934,AW046177,HGK,N,Nik	---	26921	7.83168	11.0377	4.62279	6.34151	5.9353	13.348	14.9497	9.39334	8.93173	8.39697
GSMG0000178	chr1:40084714-40125230	Il1r2	interleukin 1 receptor, type II	CD121b,Il1,Il1r-2	ENSMUSG00000026073	16178	0.341495	0.726428	0.629316	0.354388	0.199822	0.417078	0.410362	0.465601	0.476327	0.560651
GSMG0000179	chr1:40225080-40316198	Il1r1	interleukin 1 receptor, type I	CD121,CD121a,CD121b,I,IL-,IL-1R1,IL-iR,Il1,Il1r-1	---	16177	0.0798703	0.283725	0.260519	0.325595	0.158621	0.256968	0.252735	0.232304	0.270386	0.176895
GSMG0000180	chr1:40238019-40241418	---	---	---	---	---	0	0	0.0484168	0	0	0	0	0.0178525	0	0
GSMG0000181	chr1:40324589-40367555	Il1rl2	interleukin 1 receptor-like 2	AI481289,AW551444,IL-1Rrp2	---	107527	0	0.00857162	0	0.0485551	0.00449202	0.033083	0.0295194	0.0428738	0.0176202	0.0429063
GSMG0000182	chr1:40429570-40465412	Il1rl1	interleukin 1 receptor-like 1	DER,DER4,Fit-,Fit-1,Ly8,Ly84,ST,St2,St2-,St2-rs1,ST2L,T1,T1/ST,T1/ST2	---	17082	0	0	0	0	0	0	0	0	0.00349865	0.0107614
GSMG0000183	chr1:40465551-40500854	Il18r1	interleukin 18 receptor 1	I,Il1,Il18ralpha,Il1rrp	---	16182	0	0.0112655	0.00843216	0.00354528	0	0.02656	0.0129624	0.00417394	0.00385964	0
GSMG0000184	chr1:40515362-40551705	Il18rap	interleukin 18 receptor accessory protein	AcPL,IL-18R-beta,IL-18RAcP,IL-18Rbeta,IL-1RAcPL	ENSMUSG00000026068	16174	0	0.0111962	0	0.0140939	0	0.017191	0	0	0.0191795	0
GSMG0000185	chr1:40580200-40630731	Slc9a4	solute carrier family 9 (sodium/hydrogen exchanger), member 4	AW990558,D730009J23Rik,NHE,NHE4	ENSMUSG00000026065	110895	8.17771	11.1805	6.83893	10.9414	8.60797	12.7781	9.59375	9.29782	8.02296	9.44902
GSMG0000186	chr1:40681335-40769266	Slc9a2	solute carrier family 9 (sodium/hydrogen exchanger), member 2	2210416H12Rik,4932415O19Rik,AV333884,NHE,NHE2	ENSMUSG00000026062	226999	7.28584	7.43878	3.26556	5.69883	5.99033	8.08903	6.0331	6.35211	6.5404	6.41432
GSMG0000187	chr1:40771383-40785343	---	---	---	---	---	0	0	0	0	0.0351039	0	0	0.0124092	0.0229495	0
GSMG0000188	chr1:40805601-40856886	Tmem182	transmembrane protein 182	2310079P10Rik,AI414494	ENSMUSG00000079588	381339	1.44197	0.561739	0.713148	0.585856	0.591504	0.975555	0.917446	1.24871	1.18528	1.06178
GSMG0000190	chr1:42229724-42231108	---	---	---	---	---	0	0	0.059454	0	0	0.030283	0.0151291	0.0292297	0	0.0415683
GSMG0000191	chr1:42534254-42536375	---	---	---	---	---	0	0	0	0	0	0	0	0	0	0
GSMG0000192	chr1:42651726-42652401	---	---	---	---	---	0	0	0	0	0	0	0	0	0	0
GSMG0000193	chr1:42695768-42700210	Pou3f3	POU domain, class 3, transcription factor 3	Br,Brn,Brn-1,Brn1,HST01,HST011,Otf,Otf8,Skin1,ureh,urehr2	ENSMUSG00000045515	18993	13.1371	16.7716	10.8572	11.7687	13.3411	20.6356	21.0099	17.498	16.7869	17.1555
GSMG0000194	chr1:42700336-42703176	2900092D14Rik	RIKEN cDNA 2900092D14 gene	---	---	73100	4.05641	5.3387	3.4695	5.29119	4.81686	6.49164	4.62513	6.33916	5.58843	5.5043
GSMG0000195	chr1:42750712-42752884	Dalir	DNMT1 associated long intergenic non-coding RNA	Dali,Gm28525	ENSMUSG00000099784	104940697	0.298012	0.377021	0.123123	0.308488	0.316129	0.559594	0.499208	0.289798	0.416252	0.370005
GSMG0000196	chr1:42851233-42905682	Mrps9	mitochondrial ribosomal protein S9	2310002A08Rik,AW322516,mg637,Mrp-S9,S9mt	ENSMUSG00000060679	69527	26.1828	22.2388	37.3709	31.3059	28.0652	21.372	23.1549	24.8378	25.8861	26.6872
GSMG0000197	chr1:42864357-42868338	---	---	---	---	---	0	0	0	0	0	0	0	0.0152426	0	0.0048171
GSMG0000198	chr1:42952870-43035449	Gpr45	G protein-coupled receptor 45	9230112G11Rik,AW046772,PSP	ENSMUSG00000041907	93690	2.24721	1.98763	2.2249	2.63203	2.26921	2.3558	2.32235	2.37378	2.21507	2.40911
GSMG0000199	chr1:43092585-43093835	---	---	---	---	---	0	0.014558	0.31268	0.233654	0.244136	0.150882	0.0167509	0.21036	0.34415	0.214781
GSMG0000200	chr1:43098710-43115945	AI597479	expressed sequence AI597479	---	ENSMUSG00000010290	98404	10.3469	10.1033	11.8253	10.505	8.27058	12.5577	11.6443	10.3141	10.1827	10.195
GSMG0000202	chr1:43196979-43216593	---	---	---	---	---	0	0	0	0	0	0	0	0	0	0
GSMG0000203	chr1:43445751-43570516	Nck2	non-catalytic region of tyrosine kinase adaptor protein 2	4833426I10Rik,Grb,Grb4,Nck-2,NCKbe,NCKbeta	ENSMUSG00000066877	17974	10.853	10.215	15.5082	13.7494	13.0842	10.5727	17.507	15.8839	13.107	13.1109
GSMG0000204	chr1:43452948-43454715	---	---	---	---	---	0	0	0	0	0.0107941	0.0474382	0	0	0	0
GSMG0000205	chr1:43488447-43491509	---	---	---	---	---	0	0	0	0	0	0	0	0	0	0
GSMG0000206	chr1:43549163-43553093	---	---	---	---	---	0	0	0	0	0	0.00533227	0	0	0	0
GSMG0000207	chr1:43556848-43558952	---	---	---	---	---	0	0	0	0	0	0.0502287	0.00995181	0.00700325	0.0444482	0
GSMG0000208	chr1:43560273-43561565	---	---	---	---	---	0	0	0.0159219	0.00547471	0	0	0.0162064	0	0	0
GSMG0000209	chr1:43730600-43742564	Ecrg4	ECRG4 augurin precursor	1500015O10Rik,aug	ENSMUSG00000026051	78896	0	0.061617	0.232018	0.038782	0.0430544	0.0709565	0	0.0228295	0.147773	0.0642963
GSMG0000210	chr1:43933994-44002999	Tpp2	tripeptidyl peptidase II	T,TPP-2,TppII	---	22019	3.8768	5.73772	3.28802	3.63475	2.91352	5.92369	6.19445	3.18782	3.26825	3.75426
GSMG0000211	chr1:44118957-44144771	Bivm	basic, immunoglobulin-like variable motif containing	AI854267	---	246229	4.07527	5.53634	5.46363	6.06014	6.18221	5.685	7.12371	6.55846	4.92915	5.52359
GSMG0000212	chr1:44147744-44181260	Ercc5	excision repair cross-complementing rodent repair deficiency, complementation group 5	Xp,Xpg	ENSMUSG00000026048	22592	2.02126	2.64818	1.44274	1.44908	1.79023	4.19009	4.09971	2.09556	1.75762	2.27973
GSMG0000214	chr1:44551511-44796836	Gulp1	GULP, engulfment adaptor PTB domain containing 1	3110030A04Rik,5730529O06Rik,CED-6,Ced6,GU,GULP,Gulp-2	---	70676	1.46396	0.820349	0.746942	1.00971	0.679366	0.788554	0.86587	0.98855	1.20994	1.00481
GSMG0000215	chr1:44553093-44557043	---	---	---	---	---	0	0	0	0	0	0	0	0	0	0
GSMG0000216	chr1:44560885-44565447	---	---	---	---	---	0	0	0	0	0.0167235	0	0	0	0	0
GSMG0000217	chr1:44506888-44594483	---	---	---	---	---	0	0	0	0	0	0	0	0	0	0
GSMG0000218	chr1:44756895-44760469	---	---	---	---	---	0	0	0	0	0	0	0	0	0	0
GSMG0000219	chr1:45311538-45349852	Col3a1	collagen, type III, alpha 1	AW550625,Col3,Col3a-1,Tsk,Tsk-,Tsk-2,Tsk2	ENSMUSG00000026043	12825	0.0802964	0.0511889	0.0436213	0.00303595	0.0539264	0.125788	0.358383	0.0677313	0.0593285	0.027051
GSMG0000220	chr1:45767739-45770202	---	---	---	---	---	0	0	0	0	0	0	0	0	0	0
GSMG0000221	chr1:45795166-45823637	Wdr75	WD repeat domain 75	1300003A18Rik,2410118I19Rik,C77608	ENSMUSG00000025995	73674	9.638	7.975	11.0188	10.5358	9.27353	10.3457	10.8529	8.60427	8.04406	7.88086
GSMG0000225	chr1:46425518-46807477	Dnah7c	dynein, axonemal, heavy chain 7C	Dnahc,Dnahc7c	ENSMUSG00000101337	100101919	0.00657622	0	0	0	0	0.0017153	0.00792249	0.00165564	0	0.00313937
GSMG0000226	chr1:49244615-49340431	C230029F24Rik	RIKEN cDNA C230029F24 gene	---	ENSMUSG00000051616	442837	0	0	0	0	0	0	0	0	0	0
GSMG0000227	chr1:50107470-50108962	---	---	---	---	---	0	0	0	0	0	0	0	0	0	0
GSMG0000228	chr1:50812445-50817700	---	---	---	---	---	0	0	0	0	0	0	0	0	0	0
GSMG0000229	chr1:50900645-51187270	Tmeff2	transmembrane protein with EGF-like and two follistatin-like domains 2	4832418D20Rik,7630402F16Rik,TR-2	ENSMUSG00000026109	56363	35.7791	28.6288	33.2835	32.5485	31.0624	33.6203	31.0607	30.2815	27.755	34.3727
GSMG0000230	chr1:50904444-50905918	---	---	---	---	---	0	0	0	0	0	0	0	0	0	0
GSMG0000231	chr1:51009534-51011811	---	---	---	---	---	0	0	0	0	0	0	0	0	0.00821423	0
GSMG0000232	chr1:51077892-51078874	---	---	---	---	---	0	0	0	0	0	0	0	0	0	0
GSMG0000233	chr1:51088406-51092331	---	---	---	---	---	0	0.00463632	0.0104821	0	0	0.00533907	0	0	0	0
GSMG0000234	chr1:51148309-51149493	---	---	---	---	---	0	0	0	0	0	0	0	0	0	0
GSMG0000235	chr1:51195220-51197747	---	---	---	---	---	0	0	0	0	0	0.00829277	0.0165719	0.00800432	0	0
GSMG0000236	chr1:51289123-51302959	Cavin2	caveolae associated 2	S,Sdpr	ENSMUSG00000045954	20324	0.0794537	0.0297832	0.0202007	0.0224948	0.0499459	0.0480166	0.143932	0.0661654	0.0489789	0.0847423
GSMG0000237	chr1:51987147-52107188	Stat4	signal transducer and activator of transcription 4	---	---	20849	0	0	0.223409	0.230059	0	0	0.319457	0.135724	0.131335	0.31206
GSMG0000238	chr1:52119436-52161865	Stat1	signal transducer and activator of transcription 1	2010005J02Rik,AA408197	---	20846	6.40242	7.90695	4.74456	5.90694	6.22504	8.20716	6.92474	6.66445	6.84654	6.43623
GSMG0000239	chr1:52185063-52186843	---	---	---	---	---	0	0	0	0	0	0	0	0.0227269	0	0
GSMG0000240	chr1:52331823-52338165	---	---	---	---	---	0	0	0	0	0	0	0	0	0	0
GSMG0000241	chr1:52510719-52512872	---	---	---	---	---	0	0	0	0	0	0	0	0	0	0
GSMG0000242	chr1:52522892-52582677	Gm53065	predicted gene 53065	---	---	118126071	0	0	0	0	0	0	0	0	0	0
GSMG0000243	chr1:52630705-52651919	Nemp2	nuclear envelope integral membrane protein 2	5330401P04Rik,9830163O08,Tmem194b	---	227094	0.803884	0.702575	1.17353	0.623555	0.535007	1.20092	1.14559	0.423313	0.314893	0.933961
GSMG0000244	chr1:52844928-52920986	Hibch	3-hydroxyisobutyryl-Coenzyme A hydrolase	2610509I15Rik,HIBYL-C,HIBYL-COA-H	ENSMUSG00000041426	227095	6.18359	6.80925	7.16249	8.41323	7.75946	6.22348	5.69884	6.98501	6.1906	5.65807
GSMG0000245	chr1:52855516-52857603	---	---	---	---	---	0	0	0	0	0	0	0	0	0	0
GSMG0000246	chr1:53061639-53068079	Mstn	myostatin	Cmpt,Gdf8	ENSMUSG00000026100	17700	0.219513	0.2289	0.416962	0.298558	0.176349	0.217079	0.294364	0.344224	0.235268	0.290247
GSMG0000247	chr1:53196112-53197693	---	---	---	---	---	0	0	0	0	0	0	0	0	0.0559967	0
GSMG0000248	chr1:53297095-53310309	Ormdl1	ORM1-like 1 (S. cerevisiae)	C730042F17Rik	ENSMUSG00000026097	227102	6.5879	4.69807	7.29325	8.85869	8.39038	8.46009	5.58511	7.62832	6.84536	6.50192
GSMG0000249	chr1:53313624-53326343	Osgepl1	O-sialoglycoprotein endopeptidase-like 1	2610001M19Rik,AA416452	---	72085	9.69792	7.29988	9.25617	11.3989	8.24575	7.96493	6.62493	7.51975	7.88314	7.97037
GSMG0000250	chr1:53791201-53792655	---	---	---	---	---	0	0	0	0	0	0	0	0	0	0
GSMG0000251	chr1:54250683-54368727	Ccdc150	coiled-coil domain containing 150	4930511H11Rik	---	78016	0.00142745	0.00451454	0.0154129	0	0.00474753	0.0209349	0.00522942	0.015155	0.00934256	0.0287366
GSMG0000252	chr1:54681728-54767523	---	---	---	---	---	0	0	0	0	0.0358113	0	0	0	0.0140472	0
GSMG0000253	chr1:55052769-55072701	Coq10b	coenzyme Q10B	1500041J02Rik,1700030I21Rik,9530077A17Rik,AV002237,AW742641	---	67876	22.4901	14.1628	17.3927	16.8521	16.3812	10.9144	11.0146	14.7767	14.9792	14.9735
GSMG0000254	chr1:55068347-55071059	---	---	---	---	---	0	0	0	0	0	0	0.00772073	0	0.00344834	0.00707111
GSMG0000255	chr1:55088148-55091317	Hspe1	heat shock protein 1 (chaperonin 10)	10kDa,Hsp,Hsp10,mt-cpn10	ENSMUSG00000073676	15528	161.2	120.133	200.461	185.954	182.558	97.7365	100.346	128.903	136.663	119.628
GSMG0000256	chr1:55131245-55154898	Mob4	MOB family member 4, phocein	2610109B12Rik,Mobk,Mobkl3,Phocn,Pr,Prei3	---	19070	39.9207	25.8811	40.116	46.7889	39.4768	31.0394	27.984	37.3451	33.5274	31.6072
GSMG0000257	chr1:55226250-55235624	Gm10561	predicted gene 10561	EG628004	---	628004	0.0991876	0.12451	0.157901	0.103568	0.0702693	0.0110294	0.0495914	0.0149463	0.108285	0.0706516
GSMG0000261	chr1:55251571-55254072	---	---	---	---	---	0	0	0	0	0	0	0	0	0.00747853	0
GSMG0000262	chr1:55405919-55765679	Plcl1	phospholipase C-like 1	C230017K02Rik,PL,PLC-L,PLC-L1,PLCE,PLCL,PLDL1,PR,PRIP,PRIP-1	ENSMUSG00000038349	227120	8.35368	8.4936	6.22017	8.42639	6.11838	7.98887	5.71445	7.41683	7.21844	6.08209
GSMG0000263	chr1:55425051-55426952	---	---	---	---	---	0	0	0	0	0	0	0	0	0	0
GSMG0000264	chr1:55429220-55431467	---	---	---	---	---	0	0	0	0	0	0	0	0	0	0
GSMG0000265	chr1:55440904-55441975	---	---	---	---	---	0	0	0	0	0	0	0	0	0	0
GSMG0000266	chr1:55442307-55445930	---	---	---	---	---	0	0	0	0.00483254	0	0	0.00577936	0	0	0
GSMG0000267	chr1:55559460-55561055	---	---	---	---	---	0	0	0	0	0	0	0	0	0	0
GSMG0000268	chr1:55643026-55645740	---	---	---	---	---	0	0	0	0	0	0	0	0	0	0
GSMG0000269	chr1:55892077-55915845	---	---	---	---	---	0	0	0	0	0	0	0	0	0	0
GSMG0000270	chr1:55931241-55972328	9130227L01Rik	RIKEN cDNA 9130227L01 gene	---	ENSMUSG00000099950	329159	0	0	0	0	0	0	0	0	0	0
GSMG0000271	chr1:56018977-56020203	1700003I22Rik	RIKEN cDNA 1700003I22 gene	---	ENSMUSG00000100372	69356	0	0	0	0	0	0	0	0	0	0
GSMG0000272	chr1:56531822-56533876	---	---	---	---	---	0	0	0	0	0	0	0	0	0	0
GSMG0000273	chr1:56971469-57042515	9130024F11Rik	RIKEN cDNA 9130024F11 gene	B530002L08,EG329160	ENSMUSG00000087022	329160	0.0604034	0.0350542	0.0518308	0.0275019	0.00450862	0	0.0505829	0.00566263	0.0517905	0.0107373
GSMG0000275	chr1:56976801-56978640	---	---	---	---	---	0	0	0	0	0	0	0	0	0	0
GSMG0000276	chr1:57127315-57129401	1700126A01Rik	RIKEN cDNA 1700126A01 gene	---	---	115487091	0	0	0	0	0	0	0	0	0	0
GSMG0000277	chr1:57406266-57417953	Maip1	matrix AAA peptidase interacting protein 1	9430016H08Rik,AA409999,C78988	ENSMUSG00000025971	68115	5.21246	4.15496	6.53013	6.46584	5.07987	4.51591	4.05948	4.81587	4.75779	4.8813
GSMG0000278	chr1:57774417-57948397	Spats2l	spermatogenesis associated, serine-rich 2-like	2810022L02Rik,A230104H11Rik,AA987173,AI480531,AI842453,AW413586	---	67198	5.49863	5.88427	4.13872	4.18917	4.87838	5.84969	6.66654	4.77285	4.81318	5.23084
GSMG0000279	chr1:57803217-57806637	---	---	---	---	---	0	0	0	0	0	0	0	0	0	0
GSMG0000280	chr1:57956246-57956634	---	---	---	---	---	0	0	0	0.132838	0	0	0	0	0	0.0229122
GSMG0000281	chr1:57985340-58026277	Sgo2a	shugoshin 2A	1110007N04Rik,4932411A20Rik,5730576N04Rik,AU018846,AV008062,D1Ertd8,D1Ertd8e,Sg,Sgol2,Sgol2a,T,Tripin	ENSMUSG00000026039	68549	0.109655	0.084024	0.0414552	0.0539766	0.0880275	0.188748	0.116047	0.0818487	0.0550601	0.0812923
GSMG0000282	chr1:58029961-58106410	Aox1	aldehyde oxidase 1	AI196512,AI255253,Ao,Aox,Aox-1,Aox-2,Aox2,Moro,Ro	ENSMUSG00000063558	11761	0.0886078	0.0249423	0.0991723	0.0590364	0.0218236	0.0716371	0.0621561	0.0277754	0.05148	0.0875114
GSMG0000283	chr1:58113136-58200698	Aox3	aldehyde oxidase 3	1200011D03Rik,AI326299,AO,Aoh1,Aoh2	ENSMUSG00000064294	71724	0.0516419	0.00389252	0.0175422	0	0.0121079	0.0624854	0.0732606	0.0225643	0.0645365	0.032816
GSMG0000284	chr1:58200812-58202206	---	---	---	---	---	0.0193473	0	0	0	0	0.0601315	0	0.02902	0	0
GSMG0000285	chr1:58210396-58268600	Aox4	aldehyde oxidase 4	2310003G12Rik,AO,Aoh2	ENSMUSG00000038242	71872	1.1121	1.27734	0.735675	1.0527	0.758137	1.4779	1.07057	1.16206	1.1111	0.935716
GSMG0000286	chr1:58278326-58379264	Aox2	aldehyde oxidase 2	Aoh3,Aox,Aox3l1	ENSMUSG00000079554	213043	0.00423916	0.00383915	0	0.00362456	0.0138256	0.0806809	0.0220871	0.0213364	0.0145817	0.0185944
GSMG0000287	chr1:58392898-58407354	Bzw1	basic leucine zipper and W2 domains 1	1200015E15Rik,mKIAA0005	ENSMUSG00000051223	66882	147.066	123.532	130.723	145.768	128.979	118.843	128.871	135.185	125.573	135.253
GSMG0000288	chr1:58445151-58493999	Nif3l1	Ngg1 interacting factor 3-like 1 (S. pombe)	1110030G24Rik	ENSMUSG00000026036	65102	28.836	30.4149	29.8396	31.421	32.1642	23.9834	24.0044	24.3622	28.2142	25.4246
GSMG0000289	chr1:58505143-58525672	---	---	---	---	---	0.0764266	0.00336172	0.011439	0.0286606	0.0282826	0.0232789	0.0121959	0.0337179	0.0398921	0.0197973
GSMG0000290	chr1:58586397-58595962	Ndufb3	NADH:ubiquinone oxidoreductase subunit B3	2700033I16Rik,CI-B12	ENSMUSG00000026032	66495	282.199	214.196	305.255	289.241	273.156	154.771	161.525	200.095	226.083	206.314
GSMG0000291	chr1:58652641-58655831	Gm20257	caspase 8 pseudogene	---	ENSMUSG00000102059	100504501	1.12291	1.32109	1.96781	1.42604	2.00204	1.11666	0.524519	1.10585	0.96325	0.853967
GSMG0000292	chr1:58711491-58758884	Cflar	CASP8 and FADD-like apoptosis regulator	2310024N18Rik,A430105C05Rik,c-F,c-Flip,Ca,Cash,Casper,CLARP,F,FLAME,FLAME-1,Flip,Gm9845,I-FLICE,MRIT	---	12633	6.02915	6.22962	7.18106	6.80721	7.8192	7.9454	7.27241	5.69282	6.3032	5.52233
GSMG0000294	chr1:58795374-58847503	Casp8	caspase 8	Casp,CASP-8,FLI,FLICE,MAC,MACH,Mch5	---	12370	0.143266	0.0443702	0.0387937	0.0473654	0.0833609	0.0514159	0.0581224	0.0279649	0.0530904	0.019962
GSMG0000295	chr1:58797783-58801623	---	---	---	---	---	0	0	0	0	0	0	0	0	0	0
GSMG0000296	chr1:58973520-58995715	Stradb	STE20-related kinase adaptor beta	AA792893,Als,Als2cr2,B830008M19,D1Ucl,D1Ucla2,ILPIP,ILPIPA,Papk,PRO1,PRO1038,Syradb	---	227154	24.5329	21.444	22.8588	23.4507	21.0066	20.0359	21.3472	21.0544	22.2577	22.4391
GSMG0000297	chr1:59119832-59122139	---	---	---	---	---	0.385788	0.575822	0.820346	0.48406	0.983769	0.508681	0.687373	0.70141	0.826929	0.714872
GSMG0000298	chr1:59151047-59169320	---	---	---	---	---	0	0	0.00984262	0	0	0	0	0	0.00894919	0
GSMG0000299	chr1:59256906-59352448	Cdk15	cyclin-dependent kinase 15	Als,Als2cr7,Pftk,Pftk2	ENSMUSG00000026023	271697	0.528432	0.688143	0.479227	0.369902	0.350191	1.31711	0.824488	0.664933	0.90375	0.226417
GSMG0000300	chr1:59482147-59486947	Fzd7	frizzled class receptor 7	Fz7	ENSMUSG00000041075	14369	0.358505	0.838848	0.807791	0.863183	0.679173	0.843344	0.54134	0.672221	0.542867	0.645431
GSMG0000301	chr1:59516264-59636417	Gm973	predicted gene 973	AW554518	ENSMUSG00000047361	381260	0	0.00896873	0.00506926	0.0252091	0.00930603	0.045621	0.0823745	0.0198469	0.0183633	0.0188736
GSMG0000302	chr1:59644028-59651015	---	---	---	---	---	0	0.012563	0	0	0	0.00467072	0	0	0	0
GSMG0000303	chr1:59651038-59654796	---	---	---	---	---	0	0	0	0	0	0	0.00557174	0	0	0
GSMG0000304	chr1:59685005-59712192	Nop58	NOP58 ribonucleoprotein	M,MSSP,N,Nol5,nop5,SIK	ENSMUSG00000026020	55989	9.96607	10.6257	8.2168	7.58104	7.44974	11.7897	10.4631	8.54994	9.13645	8.28286
GSMG0000305	chr1:59716538-59719044	---	---	---	---	---	0.903025	0.947961	0.828229	0.908276	0.647132	1.65631	0.984045	1.23637	1.11004	1.14366
GSMG0000306	chr1:59763399-59879014	Bmpr2	bone morphogenetic protein receptor, type II (serine/threonine kinase)	2610024H22Rik,AL117858,AW546137,BB189135,BM,BMP,BMP-,BMP-2,BMPR-2,BMPR-II,BMPRII,BRK-3,Gm20272	ENSMUSG00000067336	12168	10.0409	12.9711	6.98637	6.53423	7.71045	16.5979	14.209	10.0752	9.14908	11.1554
GSMG0000310	chr1:59913005-59985348	Fam117b	family with sequence similarity 117, member B	2810425F24Rik,6330416D14Rik,Als2,Als2cr13	ENSMUSG00000041040	72750	15.8695	26.1229	14.6292	16.8677	15.2622	21.8581	22.6121	20.5079	17.5236	21.1858
GSMG0000313	chr1:60048642-60153952	Carf	calcium response factor	Als,Als2cr8,ECBRC-FC1,ECBRC-FC2	---	241066	2.20341	2.99064	2.38726	2.89335	2.81424	4.09107	4.86127	3.2467	3.163	3.92526
GSMG0000315	chr1:60180599-60334705	Nbeal1	neurobeachin like 1	2310076G13Rik,A530050O19Rik,A530083I02Rik,AI662228,ALS2,ALS2CR17	ENSMUSG00000073664	269198	0.133154	0.166977	0.125961	0.101846	0.095893	0.176441	0.206424	0.160177	0.137035	0.139366
GSMG0000316	chr1:60227222-60229898	---	---	---	---	---	0	0	0	0	0	0	0	0	0	0
GSMG0000317	chr1:60284819-60286196	---	---	---	---	---	0	0	0	0	0	0	0	0	0	0.00696328
GSMG0000318	chr1:60336293-60338318	---	---	---	---	---	0.102183	0.135332	0.182854	0.0927901	0.219026	0.41458	0.226899	0.240724	0.214809	0.137964
GSMG0000319	chr1:60343300-60388059	Cyp20a1	cytochrome P450, family 20, subfamily a, polypeptide 1	A930011N14Rik,Cypm	ENSMUSG00000049439	77951	5.37014	4.72555	4.87072	5.95397	3.53899	4.41048	4.25769	5.37572	5.36574	4.4096
GSMG0000320	chr1:60409619-60481162	Abi2	abl interactor 2	8430425M24Rik,AblBP3,AI839867,ArgBP1,C130078H13	---	329165	30.7739	28.9386	31.2713	30.6997	25.5628	29.3777	26.9363	29.7653	25.8962	30.4438
GSMG0000321	chr1:60450924-60453201	---	---	---	---	---	0	0	0	0	0	0	0	0	0	0
GSMG0000322	chr1:60566693-60566755	---	---	---	---	---	0	0	0	0	0	0	0	0	0	0
GSMG0000323	chr1:60704259-60704413	---	---	---	---	---	317.159	279.346	321.522	334.762	299.057	232.759	226.634	247.32	268.614	257.408
GSMG0000324	chr1:60705328-60705699	---	---	---	---	---	23.3845	22.1847	17.6271	14.3029	16.4998	13.8622	14.5135	11.6896	12.4383	11.6125
GSMG0000325	chr1:60746388-60773359	Cd28	CD28 antigen	---	ENSMUSG00000026012	12487	3.62073	2.51736	2.4792	3.1808	3.11684	2.37052	2.02629	4.18714	3.72454	2.67348
GSMG0000326	chr1:60758872-60761242	---	---	---	---	---	0	0	0	0	0	0	0	0	0	0
GSMG0000327	chr1:60777289-60778283	---	---	---	---	---	0	0	0	0	0.0959412	0.0210823	0	0	0	0.0192926
GSMG0000328	chr1:60778844-60803788	---	---	---	---	---	0	0	0	0	0	0	0	0	0	0
GSMG0000329	chr1:60779352-60781461	---	---	---	---	---	0	0	0	0	0	0.0198728	0	0	0.00886857	0
GSMG0000330	chr1:60880338-60881738	---	---	---	---	---	0	0.051993	0	0.159532	0	0.0535503	0.0307886	0.0490878	0	0.0545189
GSMG0000331	chr1:60909025-60915832	Ctla4	cytotoxic T-lymphocyte-associated protein 4	Cd152,Ctla,Ctla-4,Ly-5,Ly-56	---	12477	0	0	0	0.0267192	0	0	0	0	0	0.00994135
GSMG0000332	chr1:60977914-61000318	Icos	inducible T cell co-stimulator	AILIM,CCLP,CRP-1,H4,Ly115	ENSMUSG00000026009	54167	1.21539	0.579611	0.426643	0.676807	0.447643	0.914971	1.2326	0.910881	0.453243	0.867551
GSMG0000333	chr1:60989479-60991963	---	---	---	---	---	0.0325726	0.0402925	0.028985	0.0136496	0.021891	0.00421816	0.0164122	0.0122143	0.00752971	0.00623816
GSMG0000334	chr1:61301909-61307746	---	---	---	---	---	0	0	0	0.0449605	0	0	0	0	0	0
GSMG0000335	chr1:61378431-61395904	9530026F06Rik	RIKEN cDNA 9530026F06 gene	---	ENSMUSG00000085447	77341	0	0	0	0	0	0	0	0	0	0
GSMG0000336	chr1:61638823-62642283	Pard3b	par-3 family cell polarity regulator beta	1810008K04Rik,2010002N16Rik,2810455B10Rik,Als2,Als2cr19,P,PA,PAR3,PAR3B,PAR3beta,PAR3L	ENSMUSG00000052062	72823	0.0174904	0.0490408	0.0357808	0.0373696	0.0615924	0.157866	0.137753	0.065105	0.0349538	0.102606
GSMG0000337	chr1:61654422-61657158	---	---	---	---	---	0	0	0	0	0	0	0	0	0	0
GSMG0000338	chr1:61677249-61680277	---	---	---	---	---	0	0	0	0	0	0	0	0	0	0
GSMG0000339	chr1:61792724-61796310	---	---	---	---	---	0	0	0	0	0	0	0	0	0	0
GSMG0000340	chr1:61805220-61806140	---	---	---	---	---	0	0	0	0	0	0	0	0	0	0
GSMG0000341	chr1:61880331-61882506	---	---	---	---	---	0	0	0	0	0	0	0	0	0	0
GSMG0000342	chr1:61903244-61907108	---	---	---	---	---	0	0	0	0.00889256	0	0	0	0	0	0
GSMG0000343	chr1:62174164-62178058	---	---	---	---	---	0	0	0	0	0	0	0	0	0	0
GSMG0000345	chr1:62247153-62249670	---	---	---	---	---	0	0	0	0	0	0	0	0	0	0
GSMG0000346	chr1:62389904-62392188	---	---	---	---	---	0	0	0	0	0	0	0	0	0	0
GSMG0000347	chr1:62542489-62544635	---	---	---	---	---	0	0	0	0	0	0	0	0	0	0
GSMG0000348	chr1:62623902-62625661	---	---	---	---	---	0	0	0	0	0	0	0	0	0	0
GSMG0000350	chr1:62703317-62818692	Nrp2	neuropilin 2	1110048P06Rik,N,Np,Np-2,Np2,Npn-2,Npn2	---	18187	1.46346	4.33259	3.91192	2.68532	2.46513	7.47344	7.48643	3.67089	4.09479	5.95803
GSMG0000356	chr1:63114471-63158295	Ino80dos	INO80 complex subunit D, opposite strand	Gm11602	ENSMUSG00000084799	100380944	0.582164	0.373181	0.208278	0.276201	0.312101	0.517974	0.761214	0.395562	0.466589	0.684955
GSMG0000359	chr1:63176831-63180486	Eef1b2	eukaryotic translation elongation factor 1 beta 2	2810017J07Rik,Eef1b	ENSMUSG00000025967	55949	89.9063	71.6477	103.727	97.8856	86.7212	51.1923	55.5476	73.4219	76.7392	72.6166
GSMG0000360	chr1:63200358-63314575	Zdbf2	zinc finger, DBF-type containing 2	4930431J08Rik,9330107J05Rik	---	73884	0.799852	0.759953	0.409778	0.473475	0.505663	1.45538	1.05383	0.60545	0.645397	0.620619
GSMG0000362	chr1:63445889-63596276	Adam23	a disintegrin and metallopeptidase domain 23	AW046396,MDC3	---	23792	12.9727	15.9467	9.74196	9.86351	10.4866	16.416	16.5301	12.083	11.3839	14.377
GSMG0000363	chr1:63730624-63754655	Fastkd2	FAST kinase domains 2	2810421I24Rik	---	75619	9.61186	6.82365	11.2863	10.3203	9.41231	7.46578	5.79754	8.29623	8.00913	7.61594
GSMG0000364	chr1:63964726-63968999	Gm13749	predicted gene 13749	---	ENSMUSG00000044689	433315	0	0.0133904	0.380111	0.429827	0.0140347	0.0308401	0.639967	0.319999	0.198605	0.331178
GSMG0000365	chr1:64532804-64604547	Creb1	cAMP responsive element binding protein 1	2310001E10Rik,3526402H21Rik,AV083133,Cre,Creb,Creb-,Creb-1	---	12912	15.6699	12.5545	9.2547	9.60433	10.8569	9.87247	11.0483	9.72977	10.8025	11.5392
GSMG0000370	chr1:64620525-64622754	---	---	---	---	---	0	0	0	0	0	0.0282043	0	0	0	0
GSMG0000373	chr1:64736237-64740609	---	---	---	---	---	0.0123377	0.0138927	0.0329363	0.0392965	0.0261754	0.0383455	0.0239463	0.0185059	0	0.0657944
GSMG0000374	chr1:65186682-65278696	Pikfyve	phosphoinositide kinase, FYVE type zinc finger containing	5230400C17Rik,P,p235,Pip,Pip5k,Pip5k3,Pipk5k3,PipkIII	---	18711	1.45837	2.18102	0.838253	1.49237	1.51914	2.97355	3.3424	1.46032	1.6572	2.26547
GSMG0000376	chr1:65311257-65389620	Pth2r	parathyroid hormone 2 receptor	Pth,Pthr2	ENSMUSG00000025946	213527	0	0	1.1918	0.434553	0	0	0.416014	0.0519372	0.100042	0.641819
GSMG0000377	chr1:65926521-65928309	Crygf	crystallin, gamma F	3110001K11Rik,Cryg-,Cryg-2,DGcry-,DGcry-2,Len,Len-2	---	12969	0	0.291428	0	0	0	0.0335831	0	0	0	0
GSMG0000378	chr1:66175313-66442581	Map2	microtubule-associated protein 2	G1-397-34,MAP,MAP-2,Mta,Mtap-2,Mtap2,re,repro4	---	17756	25.5758	37.5099	19.9701	19.234	21.8422	60.0509	61.038	31.5951	33.7977	35.8028
GSMG0000379	chr1:66292540-66295229	---	---	---	---	---	0	0	0	0	0	0	0	0	0	0
GSMG0000380	chr1:66384612-66386307	---	---	---	---	---	0	0	0	0	0	0	0	0	0	0
GSMG0000381	chr1:66467934-66699150	Unc80	unc-80, NALCN activator	C030018G13Rik,C230061B10Rik,UNC-80	ENSMUSG00000055567	329178	6.97275	15.2171	6.3829	6.29274	6.71111	28.2544	29.2191	9.83028	11.7774	11.1303
GSMG0000382	chr1:66656906-66659308	---	---	---	---	---	0	0	0	0	0.015881	0.0348973	0.0306137	0	0.0155735	0
GSMG0000383	chr1:66688936-66692337	---	---	---	---	---	0	0	0	0	0	0.0616167	0.0641627	0.0118947	0.0109626	0.0169158
GSMG0000384	chr1:66700831-66719805	Rpe	ribulose-5-phosphate-3-epimerase	2810429B02Rik,5730518J08Rik	---	66646	6.72453	6.54673	9.68872	9.61072	7.85596	8.21397	7.05841	8.78703	7.71935	7.62324
GSMG0000390	chr1:67123027-67231266	Cps1	carbamoyl-phosphate synthetase 1	4732433M03Rik,C,CPS,D1Ucl,D1Ucla3	ENSMUSG00000025991	227231	0	0.00328396	0	0.0186642	0	0	0.0113735	0.0109869	0.0135461	0.0138887
GSMG0000391	chr1:69441055-69444084	---	---	---	---	---	0	0	0	0	0	0	0	0	0	0
GSMG0000392	chr1:69513930-69547709	---	---	---	---	---	0	0	0	0	0	0	0	0	0	0
GSMG0000393	chr1:69595036-69598522	---	---	---	---	---	0	0	0	0	0	0	0	0	0	0
GSMG0000394	chr1:69826969-70725132	Spag16	sperm associated antigen 16	4921511D23Rik,4930524F24Rik,4930585K05Rik,AV261009,Pf2,Pf20,Wdr2,Wdr29	---	66722	0	0.0249547	0.00925779	0	0.0062818	0.0287372	0.0063808	0.0304187	0.0256094	0.000656876
GSMG0000395	chr1:70725715-70885397	Vwc2l	von Willebrand factor C domain-containing protein 2-like	A830006F12Rik,B,Brl,bror	---	320460	1.0935	2.10471	0.944988	1.69795	1.20537	1.53607	1.45811	0.933381	1.19557	1.10019
GSMG0000399	chr1:71652832-71662843	Apol7d	apolipoprotein L 7d	Gm15456	ENSMUSG00000073652	100042814	0.0194272	0.00897072	0	0	0	0	0	0	0	0
GSMG0000400	chr1:72236464-72274869	D230017M19Rik	RIKEN cDNA D230017M19 gene	B930094L07Rik	---	320933	0.312071	0.311375	0.279922	0.429637	0.32018	0.292482	0.355579	0.281338	0.290942	0.318079
GSMG0000401	chr1:72284367-72303103	Tmem169	transmembrane protein 169	A830020B06Rik	ENSMUSG00000026188	271711	14.4507	14.3859	13.7755	16.4272	13.8233	20.3303	16.8505	15.6974	14.718	12.9839
GSMG0000402	chr1:72307419-72394953	Xrcc5	X-ray repair complementing defective repair in Chinese hamster cells 5	AI314015,CTC85,CTCBF,Ku80,Ku86	ENSMUSG00000026187	22596	9.94041	8.6413	9.44101	10.7179	10.1517	10.282	9.35268	8.78763	8.30576	8.47378
GSMG0000405	chr1:72537045-72636790	Smarcal1	SWI/SNF related matrix associated, actin dependent regulator of chromatin, subfamily a-like 1	6030401P21Rik,AI851716,Mh,Mharp	---	54380	11.5756	16.3127	9.66207	10.4568	11.3534	14.3191	16.6753	12.6303	11.0266	14.1937
GSMG0000406	chr1:72556549-72558191	---	---	---	---	---	0	0.0211376	0	0	0	0.0127624	0	0	0	0
GSMG0000409	chr1:72824480-72852469	Igfbp2	insulin-like growth factor binding protein 2	AI255832,IBP-2,IGFBP,Igfbp-2,mIGFBP-2	---	16008	166.708	210.046	233.172	198.483	359.083	159.607	115.224	170.796	168.33	168.74
GSMG0000410	chr1:72832895-72834402	---	---	---	---	---	0	0	0	0.0570021	0	0	0	0	0	0
GSMG0000411	chr1:72951531-72960904	---	---	---	---	---	0	0.00140205	0.0319096	0.014737	0.00953544	0.0367402	0.026708	0.0313758	0.00967105	0
GSMG0000412	chr1:72963785-72973173	---	---	---	---	---	0	0	0	0	0	0	0	0	0	0
GSMG0000413	chr1:73016035-73025508	1700027A15Rik	RIKEN cDNA 1700027A15 gene	---	---	69449	0	0	0	0	0	0	0	0	0	0
GSMG0000414	chr1:73398966-73430779	D530049I02Rik	RIKEN cDNA D530049I02 gene	---	ENSMUSG00000101812	78718	0	0	0	0	0	0	0	0	0	0
GSMG0000415	chr1:74125538-74148230	Rufy4	RUN and FYVE domain containing 4	F930048N03Rik	---	435626	0	0.00782354	0	0	0	0	0	0	0.0160824	0
GSMG0000416	chr1:74153988-74161246	Cxcr2	chemokine (C-X-C motif) receptor 2	CD128,CDw128,Cmka,Cmkar2,Gpcr,Gpcr16,I,Il,IL-,IL-8rb,IL-8Rh,IL8RA,Il8rb,mIL-8RH	ENSMUSG00000026180	12765	0	0	0	0	0	0	0	0	0	0
GSMG0000417	chr1:74236517-74268208	Arpc2	actin related protein 2/3 complex, subunit 2	2210023N03Rik,34kDa,p34-,p34-Arc	---	76709	204.599	152.265	201.895	188.597	173.541	159.681	186.679	155.1	157.512	181.53
GSMG0000418	chr1:74239190-74241671	---	---	---	---	---	0	0	0	0	0	0	0.0168792	0	0	0.00772949
GSMG0000419	chr1:74278550-74279624	Gpbar1	G protein-coupled bile acid receptor 1	BG37,GPCR,GPR1,GPR131,M-B,M-BAR,TGR,TGR5	ENSMUSG00000064272	227289	0.0251118	0	0.0383074	0	0	0.0776601	0.0779836	0	0	0
GSMG0000420	chr1:74284930-74353692	Pnkd	paroxysmal nonkinesiogenic dyskinesia	2210013N15Rik,2810403H05Rik,AI854243,Brp,Brp17,MNCb-5687,MR-1,Tahccp2	---	56695	51.5033	61.9081	44.4535	45.0476	52.0662	59.2752	65.5593	54.9295	56.1839	56.5737
GSMG0000424	chr1:74362107-74369321	Catip	ciliogenesis associated TTC17 interacting protein	Gm216	---	241112	0.715656	1.08911	0.895516	1.01575	0.856653	1.01254	0.670819	0.838727	0.958824	0.970093
GSMG0000425	chr1:74375201-74386052	Slc11a1	solute carrier family 11 (proton-coupled divalent metal ion transporters), member 1	Bcg,It,Ity,Ity1,L,Lsh,N,Nr,Nramp,Nramp1	ENSMUSG00000026177	18173	0.247138	0.0470772	0.0538745	0.111609	0.170442	0.0914702	0.0546686	0.176339	0.102996	0.0750331
GSMG0000426	chr1:74391599-74397266	Ctdsp1	CTD (carboxy-terminal domain, RNA polymerase II, polypeptide A) small phosphatase 1	GIP,Nif3,NLIIF,SC,SCP1	ENSMUSG00000026176	227292	0.294895	0.573565	0.396868	0.691665	0.639841	0.768748	1.06821	0.832787	0.847718	0.676608
GSMG0000427	chr1:74409384-74435560	Vil1	villin 1	Vil	ENSMUSG00000026175	22349	0.0348339	0.0176276	0.026569	0	0	0.0198726	0.0229537	0.00648481	0.0325164	0.00619208
GSMG0000428	chr1:74506058-74530842	Cnot9	CCR4-NOT transcription complex, subunit 9	2610007F23Rik,AI593551,FL1,Fl10,Rqcd,Rqcd1	ENSMUSG00000026174	58184	7.14867	5.00703	5.01386	5.49036	5.84074	5.26985	6.1604	5.02007	4.87436	5.15597
GSMG0000429	chr1:74542887-74567794	Plcd4	phospholipase C, delta 4	4921507K24Rik	---	18802	0.124656	0.320719	0.248753	0.143247	0.410575	0.467436	0.203964	0.330808	0.53363	0.26871
GSMG0000430	chr1:74588289-74592443	Bcs1l	BCS1-like (yeast)	9130022O19Rik	---	66821	18.5445	18.5381	21.706	20.4322	18.079	12.6309	16.2691	16.756	17.1426	17.3236
GSMG0000431	chr1:74601455-74636899	Stk36	serine/threonine kinase 36	1700112N14Rik,B930045J24,FU,Fuse,Fused,mKIAA1278	---	269209	0.258624	0.752625	0.209259	0.413357	0.379364	0.832271	0.486177	0.268157	0.566528	0.428937
GSMG0000432	chr1:74661702-74703730	Ttll4	tubulin tyrosine ligase-like family, member 4	4632407P03Rik,AI451681,mKIAA0173	---	67534	0.240144	0.316321	0.191873	0.13641	0.232334	0.540131	0.724136	0.226587	0.234839	0.224384
GSMG0000433	chr1:74713326-74737897	Cyp27a1	cytochrome P450, family 27, subfamily a, polypeptide 1	1300013A03Rik,Cyp2,Cyp27	ENSMUSG00000026170	104086	18.9267	19.0696	11.9472	14.9767	15.1908	15.9061	16.1971	16.1554	16.4961	15.1412
GSMG0000434	chr1:74771891-74785319	Wnt6	wingless-type MMTV integration site family, member 6	AA409270,Wnt-,Wnt-6	ENSMUSG00000033227	22420	1.53698	1.35062	1.39961	1.17172	1.02352	1.28003	0.630348	1.97509	0.644032	1.19325
GSMG0000435	chr1:74791516-74804173	Wnt10a	wingless-type MMTV integration site family, member 10A	---	ENSMUSG00000026167	22409	2.88039	3.32897	3.88146	4.08101	4.14705	3.88056	2.93247	4.24568	5.09536	4.29593
GSMG0000436	chr1:74850894-74879953	Gm16582	predicted gene 16582	---	ENSMUSG00000089964	102634844	0	0	0.00123719	0.0178313	0	0	0.0108659	0.0104966	0	0.0199033
GSMG0000437	chr1:74855029-74857732	Cdk5r2	cyclin-dependent kinase 5, regulatory subunit 2 (p39)	B230310J22Rik,p3,p39	ENSMUSG00000090071	12570	48.6336	54.709	72.0769	60.5107	62.5178	49.7514	62.3001	70.4741	68.6322	75.6274
GSMG0000439	chr1:74954252-74955843	---	---	---	---	---	0	0	0	0	0	0	0	0	0	0
GSMG0000440	chr1:75142785-75147915	Retreg2	reticulophagy regulator family member 2	Fam13,Fam134a	---	227298	136.205	141.006	137.292	128.705	132.224	117.107	113.744	130.029	130.886	132.073
GSMG0000441	chr1:75168646-75171626	Zfand2b	zinc finger, AN1 type domain 2B	1110060O18Rik,C81256	---	68818	18.9943	18.0265	27.0789	24.3449	23.7847	15.2947	21.5459	18.9266	18.0242	18.9531
GSMG0000442	chr1:75192148-75199383	Ankzf1	ankyrin repeat and zinc finger domain containing 1	1300008P06Rik,2810025E10Rik,D1Ertd161,D1Ertd161e	---	52231	1.03672	1.5128	1.63454	1.71198	1.47481	1.53134	1.85811	1.54161	1.64559	1.28151
GSMG0000443	chr1:75210829-75215606	Stk16	serine/threonine kinase 16	EDP,EDPK,Krc,Krct,MPSK,PKL,PKL12,TSF-1	---	20872	61.2187	46.8494	79.7839	63.1963	63.7607	37.6301	45.504	50.9181	50.7379	49.5906
GSMG0000444	chr1:75236423-75245690	Dnajb2	DnaJ heat shock protein family (Hsp40) member B2	2700059H22Rik,Dnajb,Dnajb10,Hsj1,mDj8	---	56812	90.6485	92.5369	92.3564	93.6782	99.1566	86.508	83.7593	88.4482	89.8828	82.458
GSMG0000445	chr1:75360292-75368579	Des	desmin	---	ENSMUSG00000026208	13346	0	0	0	0.0281093	0	0	0	0.00661876	0	0.018623
GSMG0000446	chr1:75375297-75432270	Speg	SPEG complex locus	Ape,Apeg1,AW125581,BPE,BPEG,D1Bwg1450e,mKIAA1297,SP,SPE,SPEGalpha,SPEGb,SPEGbeta	---	11790	0.430144	0.626144	2.16161	1.01288	0.717211	0.999378	3.27482	1.40002	1.11011	2.02988
GSMG0000447	chr1:75435936-75443179	Gmppa	GDP-mannose pyrophosphorylase A	1810012N01Rik	---	69080	18.1724	20.482	21.6692	18.5101	17.6382	12.2791	17.3689	18.4463	17.4373	18.3057
GSMG0000448	chr1:75450510-75474343	Asic4	acid-sensing (proton-gated) ion channel family member 4	Acc,Accn4,BNAC4	ENSMUSG00000033007	241118	0.527223	0.119198	3.48789	0.429383	0.14933	0.740388	1.48188	0.660247	0.244465	1.50959
GSMG0000449	chr1:75479058-75485705	Tmem198	transmembrane protein 198	A230078I05Rik,Tmem198-1,Tmem198a	ENSMUSG00000051703	319998	15.5374	16.1604	24.8004	17.3916	14.9298	12.9101	24.453	19.9582	18.0567	21.4742
GSMG0000450	chr1:75507077-75510366	Inha	inhibin alpha	AW555078	ENSMUSG00000032968	16322	2.19391	2.5831	3.39916	2.5948	3.39103	3.361	5.44501	2.81363	2.78464	3.23182
GSMG0000451	chr1:75521529-75537334	Stk11ip	serine/threonine kinase 11 interacting protein	1200014D22Rik,BB131189,L,LIP1,LKB,LKB1IP	---	71728	9.49131	8.90739	8.97308	7.31822	7.10827	9.82159	10.9879	9.65077	8.13527	9.76027
GSMG0000454	chr1:76489133-76502028	Gm17751	predicted gene, 17751	---	ENSMUSG00000100553	620079	0	0	0	0.0059194	0	0	0	0.0101185	0	0
GSMG0000455	chr1:77515279-77517128	---	---	---	---	---	0	0	0	0	0	0	0.124567	0	0	0
GSMG0000457	chr1:78310157-78420287	Sgpp2	sphingosine-1-phosphate phosphatase 2	Spp2,SPPase2	ENSMUSG00000032908	433323	9.27646	8.41534	6.09201	9.60847	7.12969	9.85403	6.60955	8.28093	8.4411	8.47935
GSMG0000458	chr1:78317266-78323088	---	---	---	---	---	0	0	0	0	0	0	0	0	0	0
GSMG0000459	chr1:78375614-78376431	---	---	---	---	---	0	0	0	0	0	0	0	0	0	0
GSMG0000460	chr1:78511060-78620160	Mogat1	monoacylglycerol O-acyltransferase 1	0610030A14Rik,1110064N14Rik,Dgat2,Dgat2l,Dgat2l1,mDC2,MGAT,MGAT1,WI1-2612I11.1	---	68393	0	0.00793613	0	0.0403159	0.0332719	0.0170648	0.00904373	0.0220237	0.00459164	0.0199111
GSMG0000461	chr1:78657823-78707743	Acsl3 // Utp14b	acyl-CoA synthetase long-chain family member 3 // UTP14B small subunit processome component	2610510B12Rik,4932411L21Rik,Acs3,C85929,Facl3,js,jsd,LACS3,Pro2194	---	195435	5.02942	4.9068	5.21443	5.09532	4.75279	5.57417	5.4657	5.12285	4.95614	5.12257
GSMG0000462	chr1:78816910-78820031	Kcne4	potassium voltage-gated channel, Isk-related subfamily, gene 4	AW487937,Mi,MiRP3	ENSMUSG00000047330	57814	0	0.0726159	0.0328349	0	0.0456659	0.108709	0.0250662	0	0.00746361	0.00765238
GSMG0000463	chr1:79762716-79764507	---	---	---	---	---	0	0.0101606	0	0	0	0.0351019	0	0	0	0
GSMG0000464	chr1:79776018-79781445	Mrpl44	mitochondrial ribosomal protein L44	1810030E18Rik,5730593H20Rik,AI463302	ENSMUSG00000026248	69163	24.3612	23.5804	27.4206	26.9449	25.099	17.0974	18.4136	22.8203	21.9549	21.4538
GSMG0000465	chr1:80225043-80228792	---	---	---	---	---	0	0	0	0	0.0522551	0	0	0	0	0
GSMG0000466	chr1:80382820-80386251	---	---	---	---	---	0	0.0113028	0.0255541	0.0480198	0.0473866	0.00650802	0	0.0125633	0.0290432	0.0178666
GSMG0000467	chr1:81076948-81341764	Nyap2	neuronal tyrosine-phophorylated phosphoinositide 3-kinase adaptor 2	9430031J16Rik,Jr,Jr6,Kiaa1486	---	241134	2.12928	5.24186	2.33767	2.23744	2.68735	6.16343	6.02086	4.64168	3.8532	3.89751
GSMG0000468	chr1:81109720-81112203	---	---	---	---	---	0	0	0	0	0	0	0	0	0	0
GSMG0000469	chr1:81323406-81327011	---	---	---	---	---	0	0	0	0	0	0.00581299	0	0	0	0
GSMG0000470	chr1:82105180-82106983	---	---	---	---	---	0	0	0	0	0	0	0	0	0	0
GSMG0000471	chr1:82316579-82445364	Rhbdd1	rhomboid domain containing 1	4930418P06Rik,mRHBDD1,RRP4	---	76867	2.17089	1.8543	1.37114	1.58251	0.677929	2.03249	1.73252	1.42574	1.42468	1.67586
GSMG0000472	chr1:82352217-82355049	---	---	---	---	---	0	0	0	0	0	0	0.0147872	0.00714227	0	0
GSMG0000473	chr1:82384184-82386579	---	---	---	---	---	0	0	0	0	0	0.0174996	0	0	0	0
GSMG0000474	chr1:82586920-82722059	Col4a3	collagen, type IV, alpha 3	alph,alpha3(IV),tumst,[a]3(IV)	ENSMUSG00000079465	12828	0	0	0	0	0	0	0	0	0	0
GSMG0000475	chr1:82724890-82752390	Mff	mitochondrial fission factor	5230400G24Rik,AI314724	---	75734	60.4092	46.5396	69.1779	69.789	63.4513	43.1569	46.1916	55.2411	54.9061	52.242
GSMG0000476	chr1:82739691-82740707	---	---	---	---	---	0.0530908	0	0	0	0	0	0	0.0199084	0	0
GSMG0000477	chr1:82748387-82750085	---	---	---	---	---	0	0	0	0	0	0.00580295	0.0246627	0	0.0110152	0
GSMG0000478	chr1:82839460-82901182	Agfg1	ArfGAP with FG repeats 1	AU045498,C130049H11Rik,C85612,D730048C23Rik,Hr,Hrb,RAB,Rip	---	15463	20.8971	20.0938	22.2379	20.4908	18.8185	16.9484	22.4603	19.5679	18.401	19.5434
GSMG0000479	chr1:82906904-82910854	---	---	---	---	---	0.0204836	0	0.0104157	0	0	0.0424422	0.0106018	0.0102415	0.0236757	0
GSMG0000480	chr1:82913323-82914130	---	---	---	---	---	0	0	0	0	0	0	0	0.0501287	0	0
GSMG0000481	chr1:82924915-82925712	---	---	---	---	---	0	0	0	0	0	0	0	0	0	0
GSMG0000482	chr1:83060928-83061921	Krtap28-13	keratin associated protein 28-13	5530401N06Rik	ENSMUSG00000101315	71386	0	0	0	0	0	0	0	0	0	0
GSMG0000483	chr1:83116765-83119166	Ccl20	chemokine (C-C motif) ligand 20	CKb4,exodus,exodus-1,LARC,MI,MIP,MIP-3,MIP-3A,MIP-3[a],MIP3A,Scya,Scya20,ST3,ST38	---	20297	0	0	0	0	0	0	0	0	0	0
GSMG0000484	chr1:83159755-83210574	Daw1	dynein assembly factor with WDR repeat domains 1	4930563E19Rik,4933429D11Rik,b2b1116C,b2b1116Clo,b2b1584C,b2b1584Clo,Wdr6,Wdr69	---	71227	0	0	0	0	0	0	0	0	0	0
GSMG0000485	chr1:84839841-84900486	Fbxo36	F-box protein 36	0610008D19Rik,1110020F21Rik,2410002G19Rik,D1Ertd757,D1Ertd757e	ENSMUSG00000073633	66153	0.689117	1.10523	0.861418	0.910097	1.3739	1.43093	0.897261	0.852811	0.808374	0.556731
GSMG0000486	chr1:85105944-85114038	A530040E14Rik	RIKEN cDNA A530040E14 gene	---	---	621875	0	0	0.00934199	0	0	0	0	0	0.00424809	0
GSMG0000488	chr1:85326729-85343516	---	---	---	---	---	0	0	0	0	0	0	0	0.00835823	0.00772885	0
GSMG0000489	chr1:85600703-85645037	Sp140	Sp140 nuclear body protein	---	ENSMUSG00000070031	434484	0	0	0	0	0	0	0.0174488	0.0126418	0	0
GSMG0000490	chr1:85649988-85709998	Sp100	nuclear antigen Sp100	A430075G10Rik	---	20684	0	0.00453239	0	0	0	0.00513719	0.0182354	0.0169765	0	0.0047763
GSMG0000491	chr1:85685478-85688676	---	---	---	---	---	0	0	0	0	0	0	0	0	0	0
GSMG0000492	chr1:85775270-85784694	9930111H07Rik	RIKEN cDNA 9930111H07 gene	---	ENSMUSG00000100217	77762	0.098507	0	0	0	0	0	0	0	0	0
GSMG0000493	chr1:85793441-85851577	Cab39	calcium binding protein 39	39kD,AA408805,AA960512,C78372,MO25,MO25alpha	---	12283	41.4668	36.0478	35.5935	37.213	35.7685	42.8212	36.5718	39.2959	36.9291	35.6921
GSMG0000496	chr1:85894510-85908702	Itm2c	integral membrane protein 2C	3110038L02Rik,BR,BRI3,Bricd,Bricd2c,E25,E25C,ITM,ITM3	ENSMUSG00000026223	64294	316.011	295.885	453.376	379.588	324.905	225.476	261.874	328.925	323.348	373.986
GSMG0000497	chr1:85928482-85931754	4933407L21Rik	RIKEN cDNA 4933407L21 gene	---	ENSMUSG00000026224	71141	0.10064	0.045249	1.38694	0.404017	0.696827	0.528273	0.613628	0.352006	0.379253	0.930113
GSMG0000498	chr1:86021943-86029961	Spata3	spermatogenesis associated 3	1700011N12Rik,1700029H01Rik,4930424D10Rik,Mtsarg1,TSA,Tsarg1	---	70060	0	0	0.0138806	0	0	0	0	0	0	0
GSMG0000499	chr1:86045863-86055455	2810459M11Rik	RIKEN cDNA 2810459M11 gene	---	---	72792	0.895682	0.808853	1.23448	1.18502	1.29518	1.01109	1.02106	0.723599	0.902678	0.888533
GSMG0000500	chr1:86064618-86139295	Psmd1	proteasome (prosome, macropain) 26S subunit, non-ATPase, 1	2410026J11Rik,P11,P112,S,S1	ENSMUSG00000026229	70247	44.6851	46.0135	39.0645	43.3139	38.9254	46.818	39.1804	41.0931	40.1758	39.2073
GSMG0000501	chr1:86120883-86123561	---	---	---	---	---	0	0	0	0	0	0.00782518	0	0.015106	0.00698424	0
GSMG0000502	chr1:86154780-86278284	Armc9	armadillo repeat containing 9	3830422A13Rik,4831423D23Rik,4930438O05Rik,5730415N24Rik	---	78795	8.44364	8.14708	6.76113	7.6379	7.54273	8.22654	8.8178	7.82313	7.45941	7.79914
GSMG0000503	chr1:86221802-86224725	---	---	---	---	---	0	0.0186769	0	0	0	0.00716929	0.0456717	0	0.0319942	0
GSMG0000504	chr1:86302829-86307303	B3gnt7	UDP-GlcNAc:betaGal beta-1,3-N-acetylglucosaminyltransferase 7	beta-3Gn,beta-3GnT7,C330001H22Rik	ENSMUSG00000079445	227327	0	0.0549038	0.103442	0.0115189	0.0639393	0.161577	0.0561545	0.0135615	0.0564312	0.00642872
GSMG0000505	chr1:86359046-86373791	C130036L24Rik	RIKEN cDNA C130036L24 gene	---	---	319336	0.271263	0.346493	0.75517	0.678069	0.699443	0.403577	0.624704	0.649248	0.745157	0.415519
GSMG0000506	chr1:86426329-86428049	Tex44	testis expressed 44	1700019O17Rik	ENSMUSG00000036574	71863	0	0	0	0	0	0	0	0	0	0
GSMG0000507	chr1:86434691-86436036	---	---	---	---	---	0	0	0	0	0	0.0155805	0	0	0.0278124	0
GSMG0000508	chr1:86526557-86530712	Ptma	prothymosin alpha	Thym	ENSMUSG00000026238	19231	114.539	99.1345	134.066	114.721	131.882	122.744	103.385	123.81	106.308	97.6259
GSMG0000509	chr1:86580058-86581232	---	---	---	---	---	0	0	0	0	0	0	0	0	0	0
GSMG0000510	chr1:86582921-86609375	Cops7b	COP9 signalosome subunit 7B	D1Wsu66,D1Wsu66e,E130114M23	ENSMUSG00000026240	26895	20.1517	15.684	16.1093	18.3427	15.1417	15.4069	21.7351	15.4344	16.2877	15.488
GSMG0000511	chr1:86638201-86640454	---	---	---	---	---	0	0	0	0	0	0	0	0	0	0
GSMG0000512	chr1:86703803-87050097	Dis3l2	DIS3 like 3'-5' exoribonuclease 2	4930429A22Rik,8030493P09Rik	---	208718	6.3445	8.24681	4.95888	7.8857	6.40185	8.44301	7.98875	6.6595	8.12702	7.87719
GSMG0000513	chr1:86801075-86804027	---	---	---	---	---	0	0	0	0	0	0.00709886	0.00709302	0	0	0
GSMG0000514	chr1:86826100-86829655	---	---	---	---	---	0	0	0	0	0	0	0	0	0	0
GSMG0000515	chr1:86834993-86837778	---	---	---	---	---	0	0	0	0	0	0	0	0	0	0
GSMG0000516	chr1:86874350-86876664	---	---	---	---	---	0	0	0	0	0	0	0	0	0	0
GSMG0000517	chr1:86893902-86894367	---	---	---	---	---	0	0	0	0	0	0	0	0.076915	0	0
GSMG0000518	chr1:86917992-86920658	---	---	---	---	---	0	0	0	0	0	0	0	0	0	0
GSMG0000519	chr1:86983644-86989016	---	---	---	---	---	0	0	0	0	0	0	0	0	0	0
GSMG0000520	chr1:87036723-87039650	---	---	---	---	---	0	0	0	0	0	0.00715949	0.00715361	0	0	0
GSMG0000521	chr1:87080169-87096418	---	---	---	---	---	0	0	0	0	0	0	0	0	0	0
GSMG0000522	chr1:87124954-87128728	Akp3	alkaline phosphatase 3, intestine, not Mn requiring	Akp,Akp-3,dIAP,IAP	ENSMUSG00000036500	11648	0	0	0	0	0	0	0	0	0	0
GSMG0000523	chr1:87183314-87188405	Prss56	protease, serine 56	1700027L20Rik,Pr	ENSMUSG00000036480	69453	0	0.0502606	0	0.0158637	0.12328	0.0773992	0.157168	0.0653686	0.0431465	0.115018
GSMG0000524	chr1:87190597-87200069	Chrnd	cholinergic receptor, nicotinic, delta polypeptide	Ac,Achr,Achr-4,Acrd,L10076	ENSMUSG00000026251	11447	0	0	0	0	0	0	0	0	0	0
GSMG0000525	chr1:87204657-87212694	Chrng	cholinergic receptor, nicotinic, gamma polypeptide	Ac,Achr,Achr-3,Acrg	ENSMUSG00000026253	11449	0	0	0	0	0	0	0	0	0	0
GSMG0000526	chr1:87213910-87240488	Eif4e2	eukaryotic translation initiation factor 4E member 2	2700069E09Rik,AI036339,AV129531,D0H0S6743,D0H0S6743E,Eif4e,Eif4el3	---	26987	50.8365	48.5314	49.0292	53.8588	54.586	48.9664	49.1272	45.6166	43.0896	41.9399
GSMG0000527	chr1:87264353-87310841	Efhd1	EF hand domain containing 1	4931430I01Rik,AI452351,mito,mitocalcin,PP30,PP3051	ENSMUSG00000026255	98363	0.766442	0.876824	0.673513	0.640086	0.767657	1.16488	0.39334	1.15132	0.782383	0.648841
GSMG0000528	chr1:87326998-87450810	Gigyf2	GRB10 interacting GYF protein 2	2610016F01Rik,A830080H02Rik,AI852361,AW259676,BC006835,mKIAA0642,Tnrc,Tnrc15	---	227331	5.38776	7.28376	4.97512	4.75502	4.85651	10.8637	9.94805	6.13332	6.0701	6.11031
GSMG0000529	chr1:87453707-87455934	---	---	---	---	---	0	0.00817133	0	0	0	0	0	0	0.025196	0.0172221
GSMG0000530	chr1:87470201-87475482	Snorc	secondary ossification center associated regulator of chondrocyte maturation	3110079O15Rik,S	ENSMUSG00000026258	73234	0	0	0.263386	0	0	0.0385217	0.0384901	0.0370587	0.0610112	0.175593
GSMG0000531	chr1:87574026-87597845	Neu2	neuraminidase 2	M,MB,MBS,MSS,MT,MTS	---	23956	0.522766	1.18091	1.37331	1.09633	1.37096	1.74077	1.33763	1.6035	1.24091	1.30743
GSMG0000532	chr1:87599681-87600960	---	---	---	---	---	0	0	0	0	0	0	0.0163711	0	0	0
GSMG0000533	chr1:87620312-87720510	Inpp5d	inositol polyphosphate-5-phosphatase D	p150Ship,S,s-,s-SHIP,SH,SHI,SHIP,SHIP-1,SHIP1,SIP-145	---	16331	0.362939	0.143361	0.605424	0.344365	0.270419	0.448942	0.949021	0.640857	0.384075	0.897656
GSMG0000534	chr1:87687356-87688604	---	---	---	---	---	0	0	0	0	0	0	0	0	0	0
GSMG0000535	chr1:87756011-87792429	Atg16l1	autophagy related 16-like 1 (S. cerevisiae)	1500009K01Rik,APG,Apg16l,Atg16l,WDR3,WDR30	---	77040	16.8319	16.9423	12.8879	14.6516	15.6912	18.1665	20.0833	14.7013	12.4644	14.0574
GSMG0000536	chr1:87795784-87796816	---	---	---	---	---	0	0	0	0	0	0	0	0	0	0
GSMG0000537	chr1:87803670-87845157	Sag	S-antigen, retina and pineal gland (arrestin)	A,A930001K18Rik,Arr1,arrestin,Irbp	ENSMUSG00000056055	20215	0.158744	0.195764	0.270081	0.256767	0.0793231	0.0303641	0.271683	0.0944402	0.141728	0.235155
GSMG0000538	chr1:87865103-87865916	---	---	---	---	---	0	0	0	0	0	0	0	0	0	0
GSMG0000539	chr1:87897539-87900532	---	---	---	---	---	0	0	0	0	0	0	0	0	0	0
GSMG0000540	chr1:87853287-87945180	Dgkd	diacylglycerol kinase, delta	AI841987,D330025K09,dgkd-2,DGKdel,DGKdelta	ENSMUSG00000070738	227333	16.4314	18.7765	15.7562	13.991	14.1644	18.2022	23.6789	15.2182	14.4559	15.1863
GSMG0000541	chr1:87945478-87948670	---	---	---	---	---	0	0	0	0	0	0.00533799	0.0262389	0.0380205	0	0
GSMG0000542	chr1:88055411-88220002	Ugt1a2 // Ugt1a6a // Ugt1a10 // Ugt1a7c // Ugt1a5 // Ugt1a9 // Ugt1a6b // Ugt1a1 // Ugt1a8	UDP glucuronosyltransferase 1 family, polypeptide A2 // UDP glucuronosyltransferase 1 family, polypeptide A6A // UDP glycosyltransferase 1 family, polypeptide A10 // UDP glucuronosyltransferase 1 family, polypeptide A7C // UDP glucuronosyltransferase 1 family, polypeptide A5 // UDP glucuronosyltransferase 1 family, polypeptide A9 // UDP glucuronosyltransferase 1 family, polypeptide A6B // UDP glu…	A1,A10,A10',A11,A116,A13,A9,A9',Gnt,Gnt1,mUGTBr,mUGTBr/P,UDPGT,Udpgt-,Udpgt-1a,UDPGT1-1,UDPGT1-2,UDPGT1-6,UDPGT1-9,Ugt1,UGT1-06,UGT1-09,UGT1.6,UGT1.9,Ugt1a,UGT1A0,UGT1A01,Ugt1a10,Ugt1a12,Ugt1a13,Ugt1a6,Ugt1a7,Ugt1a9,UgtBr,UgtBr1,UGTP4	ENSMUSG00000054545,ENSMUSG00000089943,ENSMUSG00000089960,ENSMUSG00000090124,ENSMUSG00000090145,ENSMUSG00000090165,ENSMUSG00000090171,ENSMUSG00000090175	22236,394430,394432,394433,394434,394435,394436,613123,94284	0	0.00374628	0.0190571	0	0.0127612	0.0107853	0.00215529	0.00208203	0.0173273	0.00986972
GSMG0000545	chr1:88303282-88388851	Trpm8	transient receptor potential cation channel, subfamily M, member 8	CMR,CMR1,LTrpC-6,LTRPC6,TR,Trp,Trp-p8,TRPP8	---	171382	0	0	0	0.00797401	0	0.0101916	0	0	0.0181555	0.00469561
GSMG0000546	chr1:88407010-88426438	Spp2	secreted phosphoprotein 2	0610038O04Rik,pp-24,sp,spp24	ENSMUSG00000026295	75396	0.146368	0.298321	0.486984	0.342504	0.451353	0.302318	0.216055	0.369361	0.176884	0.349132
GSMG0000547	chr1:88551515-88562167	Gm19589	predicted gene, 19589	---	ENSMUSG00000100798	100503197	0	0	0	0	0	0	0	0	0	0
GSMG0000548	chr1:88653084-88654845	---	---	---	---	---	0	0	0	0	0	0	0	0	0	0
GSMG0000549	chr1:88754887-88755735	Platr5	pluripotency associated transcript 5	2410088K16Rik	ENSMUSG00000097398	78650	0	0	0	0	0	0	0.106901	0	0	0.0399852
GSMG0000550	chr1:89070414-89155087	Sh3bp4	SH3-domain binding protein 4	AI594717,AW227605,BOG2,BOG25	ENSMUSG00000036206	98402	14.9872	20.0303	11.217	12.4036	13.8157	15.6116	16.0052	16.9911	17.2223	16.5077
GSMG0000551	chr1:89138524-89139913	---	---	---	---	---	0	0	0	0	0	0	0	0	0	0
GSMG0000552	chr1:89454805-89897617	Agap1	ArfGAP with GTPase domain, ankyrin repeat and PH domain 1	Centg,Centg2,Gga,Ggap1,mKIAA1099,R75364	---	347722	20.0639	40.497	17.1523	18.8405	22.0969	56.3886	53.7619	32.4294	35.7674	37.906
GSMG0000553	chr1:89483438-89485821	---	---	---	---	---	0	0	0	0	0.00320683	0	0.0175733	0	0	0
GSMG0000554	chr1:89511097-89513101	---	---	---	---	---	0	0	0	0	0.00951752	0.041828	0	0	0	0
GSMG0000555	chr1:89516857-89518788	---	---	---	---	---	0	0	0	0	0	0	0	0	0.00288658	0
GSMG0000557	chr1:89747895-89749711	---	---	---	---	---	0	0.0200414	0	0	0	0.0115396	0	0	0	0
GSMG0000558	chr1:89804530-89805648	---	---	---	---	---	0	0	0	0	0	0.0562321	0	0	0	0
GSMG0000559	chr1:89825480-89827525	---	---	---	---	---	0	0	0	0	0	0.0204608	0.0102389	0	0	0
GSMG0000560	chr1:89930232-89933290	---	---	---	---	---	0	0	0	0	0	0	0.00747807	0	0.00667993	0
GSMG0000561	chr1:90203980-90216288	Ackr3	atypical chemokine receptor 3	AW541270,Cmko,Cmkor1,CXC-R7,Cxcr,CXCR-7,Cxcr7,Rdc,RDC-1,Rdc1	ENSMUSG00000044337	12778	1.32866	1.07325	1.57669	1.68092	1.26404	1.20416	1.53643	1.40324	1.47296	1.48947
GSMG0000563	chr1:90280457-90283912	---	---	---	---	---	0	0.0363951	0.0822843	0.00859021	0	0	0	0	0	0
GSMG0000564	chr1:90520496-90523297	---	---	---	---	---	0	0	0	0	0	0	0	0.00722132	0	0
GSMG0000565	chr1:90602972-90613341	Cops8	COP9 signalosome subunit 8	9430009J09Rik,AA408242,Cs,Csn8,Sg,Sgn8	ENSMUSG00000034432	108679	98.7227	81.9831	97.1711	98.3246	95.3077	74.7938	69.8693	81.9632	79.9161	79.811
GSMG0000566	chr1:90675159-90679793	---	---	---	---	---	0	0	0	0	0	0	0	0	0	0
GSMG0000567	chr1:90758607-90760489	---	---	---	---	---	0	0	0	0	0	0	0	0	0	0
GSMG0000568	chr1:90915100-90951142	Mlph	melanophilin	2210418F23Rik,5031433I09Rik,AW228792,D1Wsu84,D1Wsu84e,l(1)-3Rk,l1Rk3,ln,Sla,Slac-2a	ENSMUSG00000026303	171531	0	0.00435348	0	0	0	0.00758916	0.00500924	0.0144837	0	0.00458777
GSMG0000569	chr1:90998727-91128944	Lrrfip1	leucine rich repeat (in FLII) interacting protein 1	AU024550,Fl,Fliiap1	---	16978	12.8188	14.2714	9.8948	11.4933	10.805	20.6009	20.2899	12.5638	11.3862	11.6095
GSMG0000570	chr1:91145087-91170795	Rbm44	RNA binding motif protein 44	Gm817	ENSMUSG00000070732	329207	0.0140068	0.0141762	0.0106336	0	0.00495277	0.010864	0	0.0839176	0.0127898	0.0148057
GSMG0000571	chr1:91179822-91225196	Ramp1	receptor (calcitonin) activity modifying protein 1	9130218E19Rik	---	51801	11.505	9.22275	22.5008	14.0347	11.3661	7.87048	10.9826	11.8118	10.8098	13.3881
GSMG0000572	chr1:91184417-91188650	---	---	---	---	---	0	0	0	0	0.00450581	0	0	0	0	0
GSMG0000573	chr1:91189614-91191858	---	---	---	---	---	0	0	0	0	0	0	0	0	0	0
GSMG0000574	chr1:91215798-91217749	---	---	---	---	---	0	0	0	0	0	0	0	0	0	0
GSMG0000576	chr1:91298335-91321080	Scly	selenocysteine lyase	9830169H08,A930015N15Rik,S,SCL,Scly1,Scly2	ENSMUSG00000026307	50880	19.5504	21.7565	18.6513	19.3517	20.6304	19.8103	21.8145	20.1629	24.9142	23.0669
GSMG0000577	chr1:91322074-91348303	Espnl	espin-like	Gm556	ENSMUSG00000049515	227357	0.198529	0.123907	0.113556	0.113819	0.0737091	0.16197	0.0693587	0.174935	0.133441	0.0988134
GSMG0000578	chr1:91351016-91362414	Klhl30	kelch-like 30	4631423F02Rik	ENSMUSG00000026308	70788	39.1412	51.533	36.1866	38.4765	52.7951	47.0272	41.6744	40.2364	45.7127	45.3099
GSMG0000579	chr1:91366430-91374216	Erfe	erythroferrone	4832406C22,Fam132,Fam132b,myonectin	ENSMUSG00000047443	227358	0.810388	0.73161	0.493108	0.14245	0.819933	0.62347	0.416427	0.514364	0.513099	0.459989
GSMG0000580	chr1:91483023-91484774	---	---	---	---	---	0	0	0	0	0	0	0	0	0	0
GSMG0000581	chr1:91494667-91529372	Traf3ip1	TRAF3 interacting protein 1	3930402D05Rik,AU041749,MIP-,MIP-T3	---	74019	5.76403	7.22289	4.12892	3.5629	5.52072	8.05077	7.9734	6.62524	6.63502	6.43705
GSMG0000582	chr1:91540543-91559590	Asb1	ankyrin repeat and SOCS box-containing 1	1700029O08Rik,1700054C17Rik,AI426616,AI851378,mKIAA1146	---	65247	15.5294	13.0389	15.3815	17.2662	16.0611	12.8339	10.2228	14.2066	13.2333	13.1733
GSMG0000583	chr1:91801460-91848034	Twist2	twist basic helix-loop-helix transcription factor 2	bHLHa,bHLHa39,Derm,Dermo1	ENSMUSG00000007805	13345	0	0	0.138785	0.0643944	0.0714884	0.031418	0.0784805	0.0151626	0	0
GSMG0000584	chr1:91822514-91823985	---	---	---	---	---	0	0	0	0	0	0	0	0	0	0
GSMG0000585	chr1:91916258-91919551	---	---	---	---	---	0	0	0	0	0	0	0	0	0	0
GSMG0000586	chr1:91975987-91981564	---	---	---	---	---	0	0	0	0	0	0	0	0	0	0
GSMG0000587	chr1:92573125-92574206	Olfr1413	olfactory receptor 1413	MOR208,MOR208-1	ENSMUSG00000058904	259039	0	0	0	0.0158931	0.0136673	0.0581568	0.0193697	0.00935565	0	0
GSMG0000588	chr1:92588332-92589297	Olfr1412	olfactory receptor 1412	MOR208,MOR208-4	ENSMUSG00000046300	258274	0	0.0942878	0.14922	0	0.037685	0.260591	0.00409533	0.0469266	0.0969109	0
GSMG0000589	chr1:92596516-92597492	Olfr1411	olfactory receptor 1411	MOR208,MOR208-3	ENSMUSG00000062497	258483	0	0.00351283	0.0421538	0.00880144	0.0625089	0.157052	0.0735954	0.0518108	0.0960725	0
GSMG0000590	chr1:92607839-92608807	Olfr1410	olfactory receptor 1410	MOR208,MOR208-2	ENSMUSG00000063583	258484	0	0	0.0648088	0	0	0	0	0	0	0
GSMG0000591	chr1:92619881-92621001	Olfr12	olfactory receptor 12	MOR208,MOR208-5	ENSMUSG00000061616	257890	0	0.129983	0	0.00766983	0.135385	0.474165	0.196299	0.216717	0.150962	0
GSMG0000592	chr1:92831644-92860779	Gpc1	glypican 1	AI462976	ENSMUSG00000034220	14733	14.2625	24.1702	16.267	13.5861	18.6468	28.2578	34.762	23.2584	23.9472	26.7412
GSMG0000593	chr1:92865162-92867279	---	---	---	---	---	0	0	0	0	0	0	0	0	0	0
GSMG0000594	chr1:92906980-92908620	Dusp28	dual specificity phosphatase 28	0710001B24Rik,AV005521	ENSMUSG00000047067	67446	21.8367	23.4191	29.0799	29.734	34.2736	27.0845	29.2116	26.7094	28.7884	25.5147
GSMG0000596	chr1:92934376-92947948	Capn10	calpain 10	AW049679,Ca,Capn8,mKIAA1845	ENSMUSG00000026270	23830	36.9263	32.3623	45.4478	34.2397	41.3028	28.9891	38.5641	31.2691	33.1664	38.4327
GSMG0000597	chr1:92973119-92986391	Gpr35	G protein-coupled receptor 35	KPG_007	---	64095	0.138072	0.298807	0.423343	0.545306	0.620817	0.272907	0.331403	0.188833	0.419172	0.608262
GSMG0000598	chr1:93006332-93012269	Aqp12	aquaporin 12	AB084104,mAQP12	ENSMUSG00000045091	208760	0	0	0	0	0	0	0	0	0	0
GSMG0000599	chr1:93135240-93145421	Agxt	alanine-glyoxylate aminotransferase	AGT,Agt1,Agxt1,SPT	ENSMUSG00000026272	11611	0	0	0	0	0	0	0	0	0	0
GSMG0000600	chr1:93168423-93231074	Crocc2	ciliary rootlet coiled-coil, rootletin family member 2	E030010N08Rik,Gm976	ENSMUSG00000084989	381284	0.0291411	0.0417826	0.0388972	0.0371268	0.0360648	0.0962315	0.0449077	0.0409784	0.0316525	0.0310808
GSMG0000601	chr1:93221503-93223106	---	---	---	---	---	0	0	0	0	0	0	0	0.0252363	0	0
GSMG0000602	chr1:93235838-93301063	Sned1	sushi, nidogen and EGF-like domains 1	6720455I24Rik,AI197264,AI642697,D430044C15Rik,S,Snep,SST3	---	208777	0	0.0023695	0	0	0.0104613	0.0324724	0.0790331	0.00443767	0.0266728	0.0147255
GSMG0000603	chr1:93250939-93252601	---	---	---	---	---	0	0	0	0	0	0	0	0	0	0
GSMG0000604	chr1:93342853-93367618	Ppp1r7	protein phosphatase 1, regulatory subunit 7	2310014J01Rik,SDS,SDS22	ENSMUSG00000026275	66385	43.6046	44.82	36.5665	41.4865	40.3305	49.8729	53.2371	38.3633	39.3254	42.8243
GSMG0000605	chr1:93373896-93404304	Ano7	anoctamin 7	IPC,NG,NGE,Ngep,Ngep-L,Pc,Pcanap5,Tmem16g	---	404545	0.1044	0.0342881	0.0267367	0.125434	0.0510137	0.0792166	0.0361427	0.0430378	0.133739	0.0288585
GSMG0000606	chr1:93445472-93448631	---	---	---	---	---	0	0.0345632	0	0.00543856	0	0.0397143	0	0.0256118	0.0059208	0
GSMG0000607	chr1:93478993-93509733	Septin2	septin 2	AW208991,mKIAA0158,Nedd,Nedd-5,Nedd5,Sep,Sept2	ENSMUSG00000026276	18000	11.2617	9.80254	10.005	11.9889	11.6907	12.249	12.0697	12.0601	10.7325	11.1414
GSMG0000608	chr1:93512077-93621974	Farp2	FERM, RhoGEF and pleckstrin domain protein 2	AI465173,BC009153,D030026M03Rik,F,Fir,mKIAA0793	ENSMUSG00000034066	227377	1.34149	2.11328	0.78038	0.75567	1.16414	2.04801	1.58258	1.11441	1.16928	1.70877
GSMG0000609	chr1:93584610-93587783	---	---	---	---	---	0.150698	0.267651	0.118951	0.121666	0.129804	0.484467	0.46206	0.234161	0.278589	0.338211
GSMG0000610	chr1:93635192-93636508	---	---	---	---	---	0.020494	0.0511908	0.062526	0.0497561	0.144932	0.0868067	0.0207322	0.10871	0.0689453	0.0891696
GSMG0000611	chr1:93685575-93695769	Bok	BCL2-related ovarian killer	mat,matador,mtd	ENSMUSG00000026278	51800	5.49092	7.1974	26.2602	12.0121	10.6023	5.58672	15.4004	13.3968	11.6918	18.3849
GSMG0000612	chr1:93731104-93751072	---	---	---	---	---	0	0	0	0	0	0.0214053	0	0.0413216	0.03821	0.0489705
GSMG0000613	chr1:93754904-93789795	Atg4b	autophagy related 4B, cysteine peptidase	2510009N07Rik,Apg,Apg4b,Atg4bl,Autl1,AW048066	ENSMUSG00000026280	66615	57.7402	61.6399	55.6261	59.2325	56.1842	52.1045	61.1612	57.0733	51.723	55.0888
GSMG0000614	chr1:93798436-93799363	---	---	---	---	---	0	0	0	0	0	0	0	0	0	0
GSMG0000615	chr1:93803964-93822101	Ing5	inhibitor of growth family, member 5	1700001C14Rik,1700027H23Rik,1810018M11Rik,AI225768	ENSMUSG00000026283	66262	2.08174	2.2216	3.77593	2.87	2.38598	3.67351	2.95636	2.73766	2.91284	2.54485
GSMG0000616	chr1:93825239-93852361	D2hgdh	D-2-hydroxyglutarate dehydrogenase	AA408776,AA408778,AI325464	---	98314	2.6385	4.09298	3.3413	4.03046	3.61211	3.885	3.37232	3.7771	3.44717	4.0124
GSMG0000617	chr1:93861343-93876494	Gal3st2	galactose-3-O-sulfotransferase 2	Gm988,GP3ST	ENSMUSG00000094651	381334	0	0.0570612	0	0	0	0	0	0	0.00950917	0
GSMG0000618	chr1:93918437-93941239	Gal3st2b	galactose-3-O-sulfotransferase 2B	Gal3ST-2,Gal3st2,Gm9994	---	100041596	0	0.110602	0	0.00231467	0.00794261	0.0264453	0.0153762	0	0.0169749	0.0376755
GSMG0000619	chr1:93990505-94011539	Gal3st2c	galactose-3-O-sulfotransferase 2C	EG619597,Gm219,Gm6086	ENSMUSG00000073608	619597	0	0	0.00542207	0	0.0197999	0	0.00258183	0	0.00281292	0
GSMG0000620	chr1:94012050-94014462	---	---	---	---	---	0	0	0	0	0	0	0.00868101	0	0	0
GSMG0000621	chr1:94015044-94017147	---	---	---	---	---	0	0	0	0	0	0.00996473	0	0	0	0
GSMG0000622	chr1:94020493-94028328	Neu4	sialidase 4	9330166I04	---	241159	0.0119681	0.016097	0.0273855	0	0	0.0464962	0.106853	0.0303304	0.00827241	0.0398985
GSMG0000623	chr1:94797439-94802472	4930440C22Rik	RIKEN cDNA 4930440C22 gene	---	ENSMUSG00000100518	74689	0	0	0	0	0	0	0	0	0	0
GSMG0000624	chr1:95313614-95335284	Fam174a	family with sequence similarity 174, member A	2310044D20Rik,Fam174,Naa6,Tmem157	ENSMUSG00000051185	67698	20.5667	14.4248	33.9646	29.0596	28.6507	16.0324	13.7213	21.2352	21.2922	19.782
GSMG0000625	chr1:95328678-95331218	---	---	---	---	---	0	0	0	0.00676394	0	0.00825033	0.0115464	0	0	0
GSMG0000626	chr1:95467206-95469933	---	---	---	---	---	0	0	0	0	0	0	0	0	0	0
GSMG0000627	chr1:96313241-96315535	---	---	---	---	---	0	0	0	0	0	0	0	0	0	0
GSMG0000628	chr1:96871126-96881234	Panct2	pluripotency-associated noncoding transcript 2	9530060I07,EG329217,Gm5101	---	329217	0.124064	0.0886196	0.353182	0.206358	0.140061	0.144053	0.294136	0.330694	0.121302	0.13592
GSMG0000629	chr1:97770167-97793708	Gin1	gypsy retrotransposon integrase 1	4930429M06Rik,8430411H10Rik,Gin-1,Zh2c2	---	252876	4.61056	3.32907	3.97702	4.2347	4.38424	3.26802	3.3185	3.35876	3.29433	3.22701
GSMG0000630	chr1:98131466-98144655	1810006J02Rik	RIKEN cDNA 1810006J02 gene	---	ENSMUSG00000100182	69030	0	0	0	0	0	0	0	0	0	0
GSMG0000631	chr1:98173648-98190695	Gm29461	predicted gene 29461	---	ENSMUSG00000100711	102634194	0	0	0	0	0	0	0	0	0	0
GSMG0000632	chr1:98421122-98516988	Slco6d1	solute carrier organic anion transporter family, member 6d1	4921511I05Rik	---	70866	0	0	0	0	0	0	0.00664507	0	0	0
GSMG0000633	chr1:98589517-98765814	Gm7967	predicted gene 7967	EG666182	---	666182	0.0493958	0	0	0	0.0461061	0.0255871	0.0255661	0.0130405	0.0713509	0.0109322
GSMG0000634	chr1:99772401-100490599	Cntnap5b	contactin associated protein-like 5B	C230078M14Rik,Casp,Caspr5-2	ENSMUSG00000067028	241175	0.573673	0.434706	0.0255815	0.290436	0.413988	0.706423	1.44227	0.266332	0.176532	0.349321
GSMG0000635	chr1:99843105-99846205	---	---	---	---	---	0	0	0	0	0	0	0	0	0	0
GSMG0000636	chr1:99848014-99850692	---	---	---	---	---	0	0	0	0	0	0	0	0	0	0
GSMG0000637	chr1:100397024-100399053	---	---	---	---	---	0	0	0	0	0	0	0	0	0	0
GSMG0000638	chr1:101155768-101175202	Gm20268	predicted gene, 20268	---	ENSMUSG00000100684	100504525	0	0	0	0	0	0	0	0	0	0
GSMG0000639	chr1:103225864-103229279	---	---	---	---	---	0	0	0	0	0	0	0	0	0	0
GSMG0000640	chr1:103724345-103727233	---	---	---	---	---	0	0	0	0	0	0	0	0	0	0
GSMG0000641	chr1:104768520-104995481	Cdh20	cadherin 20	Cdh7	ENSMUSG00000050840	23836	6.68824	6.60797	3.80074	5.43958	5.26158	9.72626	10.768	5.60413	8.00657	7.44856
GSMG0000642	chr1:104776114-104779128	---	---	---	---	---	0	0	0.0204755	0	0	0.00695283	0.0347356	0	0.00620564	0.0254504
GSMG0000643	chr1:104906523-104909331	---	---	---	---	---	0	0	0	0	0	0	0	0	0	0
GSMG0000644	chr1:104979590-104982063	---	---	---	---	---	0	0	0	0	0	0.0423692	0	0	0	0
GSMG0000645	chr1:105356005-105361737	Gm17634	predicted gene, 17634	---	ENSMUSG00000097482	100504568	1.53531	1.59993	1.58668	1.18122	2.12227	2.35014	1.6147	1.66161	1.48305	1.66974
GSMG0000646	chr1:105647872-105649627	---	---	---	---	---	0	0	0	0	0	0	0	0	0	0
GSMG0000647	chr1:105663858-105755131	Relch	RAB11 binding and LisH domain, coiled-coil and HEAT repeat containing	2310035C23Rik,6430401N10,Kiaa1468,mKIAA1468	---	227446	12.5713	12.0533	9.57009	11.8509	9.90418	12.5679	11.4695	11.9659	12.2435	13.1638
GSMG0000649	chr1:105780717-105847981	Tnfrsf11a	tumor necrosis factor receptor superfamily, member 11a, NFKB activator	Ly109,mRANK,ODFR,OFE,R,Rank,TRAN,TRANCE-R	ENSMUSG00000026321	21934	0.470237	0.201518	0.486741	0.198633	0.362875	0.404636	0.457363	0.301004	0.185306	0.215759
GSMG0000651	chr1:105990405-106034075	Zcchc2	zinc finger, CCHC domain containing 2	9930114B20Rik,AW212015	---	227449	6.63147	4.89616	1.69545	2.60929	2.83725	5.36632	5.60934	3.48706	3.67891	3.92853
GSMG0000652	chr1:106171865-106394244	Phlpp1	PH domain and leucine rich repeat protein phosphatase 1	AI836256,mKIAA0606,P,Phlpp,Plekh,Plekhe1,SCOP	ENSMUSG00000044340	98432	3.54748	3.32363	3.45973	3.08243	2.58185	4.25464	5.08578	4.09673	3.69651	4.41334
GSMG0000653	chr1:106179979-106181550	---	---	---	---	---	0	0	0	0.0328079	0	0.0133392	0	0	0	0
GSMG0000654	chr1:106219314-106224265	---	---	---	---	---	0	0	0	0	0	0	0	0	0	0
GSMG0000655	chr1:106245575-106247063	---	---	---	---	---	0	0	0	0	0	0	0	0	0	0
GSMG0000656	chr1:106541943-106575045	---	---	---	---	---	0	0	0.0301481	0	0	0	0.00947126	0.0295677	0.0548934	0.0219109
GSMG0000657	chr1:106797564-106798970	---	---	---	---	---	0	0.0905995	0.0575063	0.0530854	0.027131	0.0298091	0.044677	0.0719307	0.0266057	0.0125259
GSMG0000658	chr1:106861173-106883348	Serpinb5	serine (or cysteine) peptidase inhibitor, clade B, member 5	1110036M19Rik,AI462524,AI646751,M,Maspin,ova,ovalbumin,PI-5,S,Spi7	---	20724	0	0	0.0229076	0.0382637	0	0	0.0388616	0.0225244	0	0
GSMG0000659	chr1:106934448-106957078	Serpinb12	serine (or cysteine) peptidase inhibitor, clade B (ovalbumin), member 12	2300003F07Rik,4833409F13Rik	---	71869	0	0	0.0475907	0.00618571	0.0220626	0	0	0	0	0
GSMG0000660	chr1:106980983-107001195	Serpinb13	serine (or cysteine) peptidase inhibitor, clade B (ovalbumin), member 13	5430417G24,hea,headpin,HU,HUR,HUR7,HURPIN,PI,PI13	ENSMUSG00000048775	241196	0	0	0	0	0	0	0	0	0	0
GSMG0000661	chr1:107105858-107107847	---	---	---	---	---	0	0	0	0	0	0	0	0	0	0
GSMG0000662	chr1:107362312-107380475	Serpinb11	serine (or cysteine) peptidase inhibitor, clade B (ovalbumin), member 11	2310046M08Rik,AU015399	ENSMUSG00000026327	66957	0	0	0	0	0.0112659	0.0123779	0	0	0	0
GSMG0000663	chr1:107422686-107452689	Serpinb7	serine (or cysteine) peptidase inhibitor, clade B, member 7	4631416M05Rik,meg,megsin,ova,ovalbumin	ENSMUSG00000067001	116872	0	0	0.0328087	0.0996896	0	0	0.122181	0.0296738	0	0.0811355
GSMG0000664	chr1:107511422-107525599	Serpinb2	serine (or cysteine) peptidase inhibitor, clade B, member 2	ova,ovalbumin,PA,PAI-2,Pl,Planh2	---	18788	0	0.0357165	0	0.049681	0.0187175	0	0.0205482	0.00992489	0.0181573	0
GSMG0000665	chr1:107529001-107549271	Serpinb10	serine (or cysteine) peptidase inhibitor, clade B (ovalbumin), member 10	9830131G07,BB233602,Serpinb10-ps	---	241197	0	0	0	0	0	0	0	0	0	0
GSMG0000666	chr1:107590005-107608978	Serpinb8	serine (or cysteine) peptidase inhibitor, clade B, member 8	CA,CAP,CAP-2,CAP2,NK1,NK10,ova,ovalbumin,S,Spi8	---	20725	0.0614134	0.0711345	0.301216	0.0671985	0.149203	0.108748	0.161448	0.111843	0.0426749	0.224514
GSMG0000667	chr1:107917258-108028337	D830032E09Rik	RIKEN cDNA D830032E09 gene	---	---	319596	0	0	0	0	0	0	0	0	0	0
GSMG0000668	chr1:108417077-108419832	---	---	---	---	---	0	0	0	0	0	0	0	0	0	0
GSMG0000669	chr1:109982326-110139958	Cdh7	cadherin 7, type 2	9330156F07Rik,CDH7L,CDH7L1	---	241201	0.115414	0.0661432	0.112427	0.0970497	0.113008	0.204006	0.160808	0.145327	0.0896808	0.234828
GSMG0000671	chr1:115705536-115709294	---	---	---	---	---	0	0	0	0	0	0	0	0	0	0
GSMG0000672	chr1:116103285-116105777	---	---	---	---	---	0	0	0	0	0	0	0	0	0	0
GSMG0000673	chr1:116222229-116228046	---	---	---	---	---	0	0	0	0	0	0	0	0	0	0
GSMG0000674	chr1:116402148-116404434	---	---	---	---	---	0	0	0	0	0	0	0	0	0	0
GSMG0000676	chr1:118321843-118333831	Nifk	nucleolar protein interacting with the FHA domain of MKI67	AI852665,C130020J04Rik,Mki6,Mki67ip	ENSMUSG00000026377	67949	35.6357	34.2749	30.5084	35.0285	36.504	30.3407	27.3069	30.9327	29.7477	26.7651
GSMG0000677	chr1:118357312-118363450	Gm28867	predicted gene 28867	---	---	102636140	0	0.02385	0	0	0	0	0	0	0	0
GSMG0000678	chr1:118389056-118609445	Clasp1	CLIP associating protein 1	1700030C23Rik,5730583A19Rik,B130045P17Rik,CL,CLA,CLASP1alpha,mCL	---	76707	11.4057	21.0438	6.99699	8.29647	12.3019	29.2304	29.4829	16.3788	17.209	19.526
GSMG0000679	chr1:118554234-118556323	---	---	---	---	---	0	0.0261334	0	0	0	0.0401261	0	0.00968259	0	0.0275398
GSMG0000680	chr1:118611528-118612678	---	---	---	---	---	0.483334	0.276919	0.0536637	0.122138	0.1513	0.838861	1.01532	0.430961	0.256507	0.423086
GSMG0000681	chr1:118627944-118685167	Tfcp2l1	transcription factor CP2-like 1	1810030F05Rik,4932442M07Rik,AA575098,Cp2,Cp2l1,Crtr,Crtr-1,D930018N21Rik,LBP,LBP-9,Tcfcp2,Tcfcp2l1	ENSMUSG00000026380	81879	0.0317047	0.023769	0.0241823	0.0134643	0.0548078	0.0791606	0.0449945	0.0184938	0.0293163	0.0594168
GSMG0000682	chr1:119052492-119053234	---	---	---	---	---	0	0	0	0	0	0	0	0	0	0
GSMG0000683	chr1:119054532-119056335	---	---	---	---	---	0	0	0	0	0	0	0	0	0	0
GSMG0000684	chr1:119058467-119059844	---	---	---	---	---	0	0	0	0	0	0	0	0	0	0
GSMG0000685	chr1:119329199-119385581	---	---	---	---	---	0	0	0	0	0	0	0	0	0	0
GSMG0000687	chr1:119903129-119906897	---	---	---	---	---	0	0	0	0	0	0.0342457	0.0320573	0	0	0
GSMG0000688	chr1:120006978-120063538	Sctr	secretin receptor	6530402O03Rik	---	319229	0	0	0	0	0.0189576	0	0.0107448	0	0.0195851	0.0260315
GSMG0000689	chr1:120121185-120188182	3110009E18Rik	RIKEN cDNA 3110009E18 gene	---	---	73103	0.970851	0.548418	0.897169	1.06572	0.762096	0.657071	0.747332	0.441767	0.599804	0.659351
GSMG0000690	chr1:120340574-120343173	C1ql2	complement component 1, q subcomponent-like 2	Adii,BC040774,CTRP,CTRP10	ENSMUSG00000036907	226359	0	0	0.112859	0	0.0285383	0.0104518	0.0104432	0.0100882	0.0186572	0.019129
GSMG0000691	chr1:120435805-120438457	---	---	---	---	---	0	0	0	0	0	0	0	0	0	0
GSMG0000692	chr1:120602410-120608468	En1	engrailed 1	En-,En-1,engrai,engrailed-1,Mo-en,Mo-en.1	ENSMUSG00000058665	13798	0	0	0	0	0	0	0	0.00178458	0	0
GSMG0000693	chr1:120621739-120690403	---	---	---	---	---	0	0	0	0	0	0	0	0	0	0
GSMG0000694	chr1:120868996-120872100	---	---	---	---	---	0	0	0	0	0	0	0	0	0	0
GSMG0000695	chr1:121087404-121178441	Celrr	cerebellum expressed regulatory RNA	AI8482,AI848258,B230209K01Rik,Ce,Celr,Gm818	ENSMUSG00000097881	98452	0	0.0119742	0.0297072	0.0680466	0.0039406	0.0174972	0.0233104	0.00562954	0.0245971	0.0266864
GSMG0000696	chr1:121328090-121331149	---	---	---	---	---	0.00881665	0.041642	0.188294	0.10076	0.112562	0.0685055	0.0752714	0.0859595	0.0489148	0.031345
GSMG0000697	chr1:121336745-121338914	---	---	---	---	---	0	0	0	0	0	0	0	0	0	0
GSMG0000698	chr1:121431049-121506458	Ccdc93	coiled-coil domain containing 93	4633402D15Rik,9230102M16Rik	---	70829	2.25058	2.92846	1.69345	1.76132	1.70526	4.18673	4.14681	2.27852	2.08134	2.3218
GSMG0000700	chr1:121706514-121707263	---	---	---	---	---	0	0	0	0	0	0	0	0	0	0
GSMG0000701	chr1:122205143-122252180	Gm28590	predicted gene 28590	---	ENSMUSG00000099960	102638832	0	0	0	0	0	0	0	0	0	0
GSMG0000702	chr1:122521746-122522876	---	---	---	---	---	0	0	0	0	0	0	0	0	0	0
GSMG0000703	chr1:122866060-122867773	---	---	---	---	---	0	0	0	0	0	0	0	0	0	0
GSMG0000704	chr1:124044822-124046412	---	---	---	---	---	0.251595	0.23879	0.307627	0.226911	0.342979	0.218424	0.30947	0.257273	0.209075	0.215977
GSMG0000705	chr1:125560595-125595834	Slc35f5	solute carrier family 35, member F5	1300003P13Rik,AI646727	ENSMUSG00000026342	74150	5.95427	5.57847	6.6864	5.27727	5.21068	5.047	4.05377	4.89286	5.12134	4.86292
GSMG0000706	chr1:125676982-125873862	Gpr39	G protein-coupled receptor 39	4933415E13Rik	ENSMUSG00000026343	71111	0	0	0.00679811	0.0056776	0	0	0	0.0601594	0.00458461	0.0238122
GSMG0000707	chr1:127204986-127483704	Mgat5	mannoside acetylglucosaminyltransferase 5	4930471A21Rik,5330407H02Rik,AI480971,GlcNA,GlcNAc-TV	ENSMUSG00000036155	107895	17.9454	23.8591	8.99525	12.3369	13.3349	41.5102	29.4855	18.2211	18.6288	21.7018
GSMG0000708	chr1:127242091-127243484	---	---	---	---	---	0	0	0	0	0	0	0	0	0	0
GSMG0000709	chr1:127270522-127275285	---	---	---	---	---	0	0	0	0	0	0	0.00953458	0	0	0
GSMG0000710	chr1:127360711-127362517	---	---	---	---	---	0	0	0	0	0	0	0	0	0	0
GSMG0000711	chr1:127406768-127407326	---	---	---	---	---	0	0	0	0	0	0	0	0	0	0
GSMG0000712	chr1:127431375-127433882	---	---	---	---	---	0	0.0072587	0	0	0	0	0	0	0	0
GSMG0000713	chr1:127483809-127488333	---	---	---	---	---	18.2879	22.1186	12.1266	13.4412	16.8442	39.8709	27.7697	20.2156	21.5254	22.1625
GSMG0000714	chr1:127729412-127767978	Acmsd	amino carboxymuconate semialdehyde decarboxylase	---	ENSMUSG00000026348	266645	0.00955709	0	0.0363024	0	0	0.00737358	0	0.00716758	0	0
GSMG0000715	chr1:127774164-127808058	Ccnt2	cyclin T2	2900041I18Rik,C81304,CycT2,CycT2a,CycT2b	ENSMUSG00000026349	72949	5.53937	4.76282	4.64907	4.82523	5.02516	7.06718	6.87325	4.69624	3.58545	4.80065
GSMG0000716	chr1:127868773-127943876	Rab3gap1	RAB3 GTPase activating protein subunit 1	1700003B17Rik,4732493F09Rik,AL117896,p13,p130,Rab3gap	---	226407	34.6656	40.1149	28.9245	32.4586	29.1495	38.9361	32.6235	30.7574	31.113	32.9876
GSMG0000723	chr1:128103299-128237738	R3hdm1	R3H domain containing 1	R3hdm	ENSMUSG00000056211	226412	24.946	25.1608	15.1917	17.4189	17.9954	40.1994	42.5604	21.1836	20.6001	22.7667
GSMG0000725	chr1:128244136-128279378	Ubxn4	UBX domain protein 4	1300013G12Rik,mKIAA0242,Ubxd2	ENSMUSG00000026353	67812	17.8496	15.913	10.502	13.8819	12.061	27.7766	25.6282	14.8356	13.2785	12.0663
GSMG0000726	chr1:128247518-128250224	---	---	---	---	---	0	0	0.00323648	0	0	0	0	0	0.00691198	0
GSMG0000728	chr1:129283106-129285593	---	---	---	---	---	0	0	0	0	0	0	0	0	0	0
GSMG0000729	chr1:129372301-129373262	---	---	---	---	---	0	0	0	0	0	0	0	0	0	0
GSMG0000730	chr1:129494909-129501770	---	---	---	---	---	0	0	0	0	0	0	0	0	0	0
GSMG0000731	chr1:129710543-129713229	---	---	---	---	---	0	0	0	0	0	0	0	0	0	0
GSMG0000732	chr1:129801157-129803132	---	---	---	---	---	0	0	0	0	0	0.0842765	0	0.0522045	0	0.0827617
GSMG0000733	chr1:129833148-129836988	---	---	---	---	---	0	0	0	0	0	0	0	0	0	0
GSMG0000734	chr1:129860815-129863045	---	---	---	---	---	0	0	0	0.0154084	0	0	0	0.0362815	0.0503241	0.00267666
GSMG0000735	chr1:129943162-129946033	---	---	---	---	---	0	0	0	0	0	0	0	0	0	0
GSMG0000736	chr1:130422823-130437914	Cd55os	CD55 molecule, opposite strand sequence	Gm15674	ENSMUSG00000087691	102640368	0	0	0	0	0	0	0	0	0	0
GSMG0000737	chr1:130462574-130557075	---	---	---	---	---	0	0.000473717	0.0220895	0.101143	0.0241552	0.0538457	0.0925126	0.0329227	0.10237	0.00753808
GSMG0000738	chr1:130467970-130470225	---	---	---	---	---	0	0	0	0	0	0	0	0	0	0
GSMG0000739	chr1:130473743-130475313	---	---	---	---	---	0	0	0	0	0	0	0	0	0	0
GSMG0000740	chr1:130717326-130722055	Yod1	YOD1 deubiquitinase	6330564D18Rik,9930028C20Rik,Hshin7	ENSMUSG00000046404	226418	2.08417	1.96854	1.96134	2.04803	1.99669	2.48736	1.71572	2.58989	2.16002	2.0237
GSMG0000741	chr1:130722835-130724357	---	---	---	---	---	4.1858	3.06469	3.39599	4.26326	5.18809	3.67233	2.61715	3.8306	4.08362	3.58025
GSMG0000742	chr1:130731975-130744621	AA986860	expressed sequence AA986860	E030025M07,Sarg	ENSMUSG00000042510	212439	0.581133	0.844831	0.785488	0.813394	0.954714	1.1691	1.19156	1.0714	0.991049	0.817684
GSMG0000743	chr1:130766382-130784433	Gm28856	predicted gene 28856	---	ENSMUSG00000100106	433347	0	0	0	0	0	0	0	0	0	0
GSMG0000744	chr1:130800895-130814740	Fcamr	Fc receptor, IgA, IgM, high affinity	---	---	64435	0	0	0	0.00985681	0	0.0360686	0.012013	0.0116047	0	0
GSMG0000745	chr1:130826683-130852249	Pigr	polymeric immunoglobulin receptor	---	ENSMUSG00000026417	18703	0	0	0	0	0	0	0.0109084	0.0052688	0	0.00499528
GSMG0000746	chr1:130865672-130880790	Fcmr	Fc fragment of IgM receptor	1810037B05Rik,Fai,Faim3,Fcmu,FcmuR,Toso	ENSMUSG00000042474	69169	0.196666	0.249251	0.418154	0.388478	0.47422	0.0344766	0.11311	0.222859	0.0942257	0.11084
GSMG0000747	chr1:131018150-131024970	Il10	interleukin 10	CSIF,IL-,Il-10	ENSMUSG00000016529	16153	0.0615296	0.0416103	0.102018	0.0840713	0.0290749	0.0638897	0.0181788	0.046145	0.0142559	0.0438495
GSMG0000749	chr1:131153180-131187658	Eif2d	eukaryotic translation initiation factor 2D	D1Ertd5,D1Ertd5e,Lg,Lgtn	---	16865	15.2777	15.0627	18.8276	19.8336	16.3483	13.3504	17.6741	15.2939	15.7496	14.9961
GSMG0000750	chr1:131286068-131288170	---	---	---	---	---	0	0	0	0	0	0	0	0.0384908	0.0881148	0.0749151
GSMG0000751	chr1:131527903-131539872	Fam72a	family with sequence similarity 72, member A	2700049P18Rik,P1,P17	ENSMUSG00000055184	108900	0.3083	0.416753	0.442085	0.425197	0.504335	0.335393	0.365944	0.412331	0.427102	0.570123
GSMG0000752	chr1:131599114-131612000	Avpr1b	arginine vasopressin receptor 1B	A,AVPR3,V,V1,V3/V,V3/V1b,VIBR,VPR3	ENSMUSG00000026432	26361	0	0	0	0	0	0.00505447	0	0	0	0
GSMG0000753	chr1:131638288-131675507	Ctse	cathepsin E	A430072O03Rik,C920004C08Rik,Cat,CatE,CE	ENSMUSG00000004552	13034	0	0.00699466	0	0.103147	0.0335003	0.155034	0.0421667	0.0214601	0.0385727	0.0205808
GSMG0000754	chr1:131688695-131715439	Rab7b	RAB7B, member RAS oncogene family	5430435G22Rik,Rab	---	226421	0.0117663	0.0202555	0	0	0	0.00933029	0.0279679	0.0156557	0.0041638	0.00426911
GSMG0000755	chr1:131744020-131770405	Slc26a9	solute carrier family 26, member 9	E030002L01Rik	ENSMUSG00000042268	320718	0	0.00991102	0.0340863	0.0110761	0.0296795	0.0462593	0.0172931	0.022344	0.0281409	0.0631323
GSMG0000756	chr1:131797389-131821472	Pm20d1	peptidase M20 domain containing 1	4732466D17Rik,AI098026	---	212933	0	0.0315219	0.0178957	0	0.0165925	0.0273456	0.0273231	0	0.00813563	0.0100653
GSMG0000757	chr1:131827977-131848861	Slc41a1	solute carrier family 41, member 1	AI573938,B230315F01Rik	ENSMUSG00000013275	98396	2.22325	2.31583	2.16373	1.69765	2.13153	3.03311	3.40008	2.39094	2.13889	2.79531
GSMG0000758	chr1:131867264-131872886	Rab29	RAB29, member RAS oncogene family	Rab,Rab7l1	ENSMUSG00000026433	226422	0.608444	0.461747	1.06668	1.24568	0.777322	0.71254	0.517507	0.602761	0.442157	0.735592
GSMG0000759	chr1:131910458-131936321	Nucks1	nuclear casein kinase and cyclin-dependent kinase substrate 1	2700010L10Rik,8430423A01Rik,AI647518,C78391,Nuc,Nucks	---	98415	43.756	39.3942	45.3238	44.1827	35.3118	37.77	28.1708	42.1318	38.2901	39.0352
GSMG0000760	chr1:131914529-131916441	---	---	---	---	---	0	0.00951755	0	0	0	0	0	0	0	0
GSMG0000761	chr1:131962915-131982972	Slc45a3	solute carrier family 45, member 3	2210413P12Rik,AU023994,AU043764,IPC,IPCA-6,Pc,Pcanap6,PRST	---	212980	0.139581	0.0994116	0.0295731	0.049195	0.142582	0.0661062	0.0963248	0.1628	0.0537775	0.176422
GSMG0000762	chr1:132007607-132032608	Elk4	ELK4, member of ETS oncogene family	2310011G17Rik,A130026I01Rik,BB162516,S,SAP-1,Sap1	ENSMUSG00000026436	13714	0.571099	0.705175	0.760833	0.7089	0.721431	0.849493	1.08944	0.782701	0.862318	0.896066
GSMG0000763	chr1:132064851-132067809	---	---	---	---	---	0	0	0.0253213	0	0.00507849	0	0.0141573	0	0	0
GSMG0000764	chr1:132078976-132079815	---	---	---	---	---	0.0642911	0.0650687	0.0245186	0.0195604	0	0.022496	0	0.0482167	0	0
GSMG0000765	chr1:132102361-132108623	Gm37120	predicted gene, 37120	---	---	108167726	0.00518856	0	0.0356175	0.033052	0.0292573	0.0161261	0.0443103	0.00778258	0.00359827	0.0442098
GSMG0000766	chr1:132191429-132259227	Lemd1	LEM domain containing 1	4930540I23Rik,6430514M23Rik,AI428128,LEMP,LEMP-1	---	213409	1.48932	1.34821	2.05539	2.04114	1.97477	1.81009	2.21724	1.71194	1.71828	2.10002
GSMG0000767	chr1:132298625-132307357	Klhdc8a	kelch domain containing 8A	A630065K24Rik	ENSMUSG00000042115	213417	34.6839	35.4496	42.1378	41.9175	43.9542	35.1802	33.6249	39.3871	43.3644	44.3734
GSMG0000768	chr1:132316125-132333488	Nuak2	NUAK family, SNF1-like kinase, 2	1200013B22Rik,mKIAA0537,Omphk2,S,Snark	---	74137	0.0459457	0.870938	0.404604	0.820315	1.28281	1.04032	0.808636	1.33271	1.19148	0.553503
GSMG0000769	chr1:132342023-132349999	---	---	---	---	---	0	0	0	0	0	0	0	0	0	0
GSMG0000770	chr1:132417453-132466959	Dstyk	dual serine/threonine and tyrosine protein kinase	A930019K20Rik,C430014H23Rik,C820013G01,Ripk5	ENSMUSG00000042046	213452	10.9095	13.3967	9.22504	10.9653	9.67409	13.9827	12.0267	13.0971	12.2397	12.3996
GSMG0000771	chr1:132435168-132438124	---	---	---	---	---	0	0	0	0	0	0.0141785	0	0	0	0
GSMG0000772	chr1:132477361-132505665	Rbbp5	retinoblastoma binding protein 5, histone lysine methyltransferase complex subunit	4933411J24Rik,C330016J05	---	213464	14.6423	18.1571	14.8997	17.916	14.892	15.9292	18.2783	17.261	17.5763	17.077
GSMG0000773	chr1:132506229-132508652	Tmem81	transmembrane protein 81	4930429O20Rik,AI465369	---	74626	1.02215	0.780796	0.746396	0.678055	0.951379	1.80711	1.05711	1.22003	1.32787	1.15682
GSMG0000774	chr1:132668595-132694591	---	---	---	---	---	0	0	0	0	0	0	0	0	0	0
GSMG0000775	chr1:132729352-132732828	Gm10538	predicted gene 10538	---	ENSMUSG00000101126	100038653	0	0	0	0	0	0	0	0	0	0
GSMG0000776	chr1:132880354-132940005	Lrrn2	leucine rich repeat protein 2, neuronal	5730406J09Rik,NL,NLRR-2	ENSMUSG00000026443	16980	16.5328	23.9492	27.1703	20.0096	19.2923	22.3192	30.0565	22.9012	22.0564	29.2651
GSMG0000777	chr1:133046010-133108688	Pik3c2b	phosphatidylinositol-4-phosphate 3-kinase catalytic subunit type 2 beta	C330011J12Rik,Gm199,PI3K-C2b,PI3K-C2beta,PI3KC2beta	ENSMUSG00000026447	240752	3.1236	5.68239	1.65144	2.70899	2.8763	6.6547	6.54588	4.53975	3.80085	3.93492
GSMG0000778	chr1:133131166-133139800	Ppp1r15b	protein phosphatase 1, regulatory subunit 15B	1810033K10Rik,AI606441,C530022L24Rik,CR,CReP	ENSMUSG00000046062	108954	14.6576	12.0055	9.29969	11.94	10.345	11.7923	11.138	12.1228	9.02924	11.4354
GSMG0000779	chr1:133185741-133187915	---	---	---	---	---	0	0	0	0	0	0	0	0	0	0
GSMG0000780	chr1:133246097-133303435	Plekha6	pleckstrin homology domain containing, family A member 6	9530028L01Rik,AU042621,Pe,Pepp3	---	240753	5.40701	8.51043	4.31787	3.19435	3.8631	13.9823	12.603	8.56953	7.56263	9.84972
GSMG0000782	chr1:133350566-133360323	Ren1 // Ren2	renin 1 structural // renin 2 tandem duplication of Ren1	D19352,R,Re,Ren,Ren-1,Ren-2,Ren-A,Ren-B,Ren1c,Ren1d,Rn,Rn-1,Rn-2,Rnr	ENSMUSG00000070645	19701.2	0	0	0	0	0.0599783	0	0.0115119	0	0	0
GSMG0000783	chr1:133363572-133380318	Etnk2	ethanolamine kinase 2	4933417N20Rik,AI197444,Eki,EKI2,Tuc1	ENSMUSG00000070644	214253	0.0979113	0.422391	0.486041	0.198173	0.768188	0.604359	0.529055	0.501783	0.523399	0.633415
GSMG0000784	chr1:133610411-133614422	---	---	---	---	---	0.0656606	0.0489181	0.0449041	0.0923678	0.179282	0.197165	0.0889529	0.159291	0.136869	0.294966
GSMG0000785	chr1:133829526-133831225	---	---	---	---	---	0	0	0	0	0	0	0	0	0	0
GSMG0000786	chr1:133835188-133838372	---	---	---	---	---	0	0	0	0	0	0	0	0	0	0
GSMG0000787	chr1:133962161-133971938	---	---	---	---	---	0	0	0	0	0	0	0	0	0	0
GSMG0000788	chr1:133986789-133987484	---	---	---	---	---	0	0	0	0	0	0	0	0	0	0
GSMG0000789	chr1:134037254-134048280	Fmod	fibromodulin	AI131919,AU041740,FM,SL,SLRR2E	ENSMUSG00000041559	14264	0.559536	0.147647	2.32588	1.53433	0.182447	0.732686	1.83951	1.00656	0.856629	2.50837
GSMG0000790	chr1:134111241-134151540	Chit1	chitinase 1 (chitotriosidase)	2300002L19Rik	---	71884	0.131009	0.281674	0.28512	0.360727	0.325773	0.173338	0.185771	0.236201	0.269203	0.263105
GSMG0000791	chr1:134182156-134190031	Chil1	chitinase-like 1	AW208766,Brp,Brp39,Chi3,Chi3l1,Gp3,Gp39	ENSMUSG00000064246	12654	1.00481	1.24221	1.41166	1.21405	1.53278	0.919439	0.920357	0.853971	1.16988	0.771164
GSMG0000792	chr1:134193448-134201237	Mybph	myosin binding protein H	AI385643,MyBP-H	ENSMUSG00000042451	53311	0.434307	0.33721	0.507443	0.300833	0.29683	0.416873	0.422123	0.29448	0.439366	0.386927
GSMG0000793	chr1:134234610-134237619	---	---	---	---	---	0	0	0	0	0	0	0	0.0339404	0.0289421	0.00586064
GSMG0000794	chr1:134287131-134292550	Myog	myogenin	bHLHc,bHLHc3,my,MYF4,myo	ENSMUSG00000026459	17928	0	0	0	0	0	0	0	0	0	0
GSMG0000795	chr1:134385939-134390983	Mgat4f	MGAT4 family, member F	4933406M09Rik	ENSMUSG00000050526	240755	0	0	0	0	0	0	0.0236996	0	0	0
GSMG0000796	chr1:134400361-134411738	Cyb5r1	cytochrome b5 reductase 1	1500005G05Rik,B5R.,B5R.1,C80155,Nqo,Nqo3a2	---	72017	38.2205	38.6684	37.0576	35.7565	34.2088	27.8408	26.2549	29.7272	27.4572	32.8404
GSMG0000797	chr1:134415378-134433348	Adipor1	adiponectin receptor 1	2810031L11Rik,ACDCR1,CGI-45,Paqr1	---	72674	34.2824	31.5131	36.3382	36.2752	37.9606	29.7174	26.4107	32.8362	32.8315	30.2096
GSMG0000798	chr1:134435627-134439575	---	---	---	---	---	0	0	0	0	0	0	0	0	0	0
GSMG0000799	chr1:134455529-134491018	Klhl12	kelch-like 12	C3i,C3ip1	---	240756	19.4316	17.8591	13.594	20.37	15.9811	19.6356	19.6225	16.7501	17.5627	19.0986
GSMG0000800	chr1:134494639-134509874	Rabif	RAB interacting factor	AI842864,AW549708,E130318E12Rik,MS,MSS4,RAS,RASGFR3	ENSMUSG00000042229	98710	34.2206	33.5177	36.8616	38.2451	36.0428	31.6653	31.5688	33.4951	32.9143	33.8075
GSMG0000801	chr1:134560171-134635285	Kdm5b	lysine (K)-specific demethylase 5B	2010009J12Rik,2210016I17Rik,AW556288,D1Ertd202,D1Ertd202e,Jari,Jarid1b,mKIAA4034,Pl,PLU,PLU-1,Plu1,PUT1,Rb-B,Rb-Bp2,RBBP2H1A	ENSMUSG00000042207	75605	7.53369	10.1853	6.53072	6.872	6.21807	9.96513	7.91394	9.72444	8.39441	8.01692
GSMG0000804	chr1:134646612-134753147	Syt2	synaptotagmin II	IP4BP,mKIAA4194,R74640,sytII	---	20980	0.353677	0.552629	0.924285	0.592714	0.760919	0.861667	0.362813	0.668438	0.927688	0.791461
GSMG0000805	chr1:134832153-134846415	---	---	---	---	---	0	0	0	0	0	0	0	0.00172261	0	0
GSMG0000806	chr1:134962565-134974180	Ube2t	ubiquitin-conjugating enzyme E2T	2700084L22Rik,C80607	ENSMUSG00000026429	67196	2.55417	1.36153	1.79701	1.86303	2.76553	1.35959	0.822105	1.4362	1.16724	1.51746
GSMG0000807	chr1:135108960-135113378	---	---	---	---	---	0	0	0	0	0	0	0	0	0	0
GSMG0000808	chr1:135132700-135145326	Ptpn7	protein tyrosine phosphatase, non-receptor type 7	BPTP,BPTP-4,C920001D21Rik,HEPTP,LC-,LC-PTP,LPTP	---	320139	0	0	0	0.00247717	0	0	0.012202	0	0	0.00558766
GSMG0000809	chr1:135146834-135156268	Arl8a	ADP-ribosylation factor-like 8A	1110033P22Rik,Arl,Arl10b,gie2	ENSMUSG00000026426	68724	372.482	371.172	312.147	342.425	333.832	309.318	279.447	305.852	327.44	315.436
GSMG0000810	chr1:135248561-135266443	---	---	---	---	---	0	0	0	0	0	0	0	0.0218355	0.0302868	0.0207019
GSMG0000811	chr1:135324812-135368065	Lmod1	leiomodin 1 (smooth muscle)	9530015K06Rik,SM-L,SM-Lmod	ENSMUSG00000048096	93689	0	0.00923734	0	0	0	0	0.0318862	0.0203711	0.00949432	0
GSMG0000814	chr1:135584772-135599950	Gm4793	predicted gene 4793	EG215714	---	215714	0.119654	0.195783	0.13995	0.219464	0.17522	0.32445	0.32637	0.19347	0.179059	0.165461
GSMG0000815	chr1:135720061-135752230	Csrp1	cysteine and glycine-rich protein 1	AA408841,AA959891,AW545626,CR,CRP1,Csrp	---	13007	7.23292	7.5504	7.60722	7.6147	9.25752	6.43342	7.59119	8.58599	9.00957	8.91371
GSMG0000816	chr1:135766085-135769133	Phlda3	pleckstrin homology like domain, family A, member 3	Tih,Tih1	ENSMUSG00000041801	27280	9.24796	8.17642	14.14	10.0943	10.1547	6.54004	8.85746	10.2017	9.31291	10.4393
GSMG0000817	chr1:135779432-135785100	---	---	---	---	---	0	0	0	0	0	0	0.00973889	0	0	0.00891947
GSMG0000818	chr1:135799421-135810989	Tnni1	troponin I, skeletal, slow 1	2700018B22Rik,AI747285,s,ssTnI	---	21952	0.0964942	0	0	0	0.0341201	0.018744	0	0.0180921	0.0165624	0.0767283
GSMG0000819	chr1:135818596-135833341	Lad1	ladinin	lad-1,LADA	ENSMUSG00000041782	16763	0.096787	0.164152	0.0479095	0.108701	0.121122	0.0210682	0.109444	0.114788	0.0615388	0.0713363
GSMG0000820	chr1:135836334-135852268	Tnnt2	troponin T2, cardiac	cTn,cTnT,Tn,Tnt	---	21956	15.3765	15.1903	9.29902	11.386	15.9731	10.699	11.6183	12.1615	12.8066	13.1311
GSMG0000821	chr1:136008219-136035030	Tmem9	transmembrane protein 9	1500015G18Rik,AW545782	---	66241	64.6442	60.0457	79.601	70.2453	77.9748	48.1977	50.3817	61.4012	65.3517	64.0757
GSMG0000822	chr1:136052784-136119822	Cacna1s	calcium channel, voltage-dependent, L type, alpha 1S subunit	AW493108,Cav1,Cav1.1,Cchl1,Cchl1a3,DHPR,DHPRalpha1s,fmd,mdg,s,sj	---	12292	1.56656	1.49588	0.821336	0.919111	0.971248	2.20344	1.87308	1.09283	1.0561	1.24178
GSMG0000823	chr1:136057181-136059433	---	---	---	---	---	0	0	0	0	0	0	0	0	0	0
GSMG0000824	chr1:136131390-136178001	Kif21b	kinesin family member 21B	2610511N21Rik,mKIAA0449	---	16565	1.91504	4.81408	2.61231	2.15724	3.02623	6.47049	8.18894	4.09881	3.71607	4.22235
GSMG0000825	chr1:136163288-136164830	---	---	---	---	---	0	0	0	0	0	0	0	0	0	0
GSMG0000826	chr1:136216073-136225071	---	---	---	---	---	0	0	0	0	0	0	0	0	0	0
GSMG0000827	chr1:136247661-136250481	---	---	---	---	---	0	0	0	0	0	0	0	0	0	0
GSMG0000828	chr1:136259407-136274406	---	---	---	---	---	0.0182848	0.037012	0.0836789	0.0349432	0.0129309	0.0142073	0.0709783	0.0700979	0.10362	0.0516584
GSMG0000829	chr1:136415270-136440220	Ddx59	DEAD box helicase 59	1210002B07Rik,4833411G06Rik	ENSMUSG00000026404	67997	6.66013	6.10091	5.52195	5.26295	4.39122	4.4378	5.3545	4.16034	4.95715	4.21322
GSMG0000830	chr1:136422586-136424672	---	---	---	---	---	0	0	0	0	0	0.0301378	0	0	0	0
GSMG0000831	chr1:136466370-136531511	Kif14	kinesin family member 14	D1Ertd367,D1Ertd367e,E130203M01	ENSMUSG00000041498	381293	0.0203011	0	0.00252654	0	0	0.00257379	0.00512621	0	0	0
GSMG0000833	chr1:136624901-136630391	Zfp281	zinc finger protein 281	Znf281	---	226442	4.5554	4.3378	3.90287	3.41317	3.11652	4.97297	4.62899	4.1805	3.619	4.37085
GSMG0000834	chr1:136696211-136726142	Platr22	pluripotency associated transcript 22	Gm16880	---	100503474	0	0	0	0	0	0	0	0	0	0
GSMG0000835	chr1:137252134-137254057	---	---	---	---	---	0	0	0	0	0	0	0	0	0	0
GSMG0000836	chr1:137898594-137899729	---	---	---	---	---	0.10693	0	0.0724972	0.166306	0.126034	0.304644	0.119913	0.0534632	0.0329582	0.0253439
GSMG0000837	chr1:137909291-137912921	---	---	---	---	---	0	0	0	0	0	0	0.0230728	0	0	0.00528288
GSMG0000838	chr1:137924387-137926379	---	---	---	---	---	0	0	0	0	0	0	0	0	0	0.00258206
GSMG0000839	chr1:137927251-137930273	---	---	---	---	---	0	0	0	0	0	0	0.00692873	0.00669322	0	0
GSMG0000840	chr1:137932041-137933284	---	---	---	---	---	0	0	0	0	0.0920665	0.0278566	0	0	0	0.0462837
GSMG0000841	chr1:137935189-137937346	---	---	---	---	---	0	0	0	0	0	0	0.0194146	0	0	0.00889053
GSMG0000842	chr1:137949422-137954643	---	---	---	---	---	0	0.00229671	0.00198916	0	0	0.0240825	0.0280732	0.0309675	0.0107473	0.00367302
GSMG0000843	chr1:137957825-137960627	---	---	---	---	---	0.0146251	0.00649449	0.0480908	0.0490519	0.0272278	0	0.0148218	0.0144375	0.0667516	0.00888722
GSMG0000845	chr1:137971174-137972315	---	---	---	---	---	0	0	0	0	0	0	0	0	0	0
GSMG0000846	chr1:138261643-138262061	---	---	---	---	---	0	0	0	0	0	0	0	0	0	0
GSMG0000847	chr1:138273738-138289462	Atp6v1g3	ATPase, H+ transporting, lysosomal V1 subunit G3	---	ENSMUSG00000026394	338375	0	0	0	0	0.0202475	0	0	0	0	0
GSMG0000848	chr1:138963709-139178960	Dennd1b	DENN/MADD domain containing 1B	4632404N19Rik,4930467M19Rik,6820401H01Rik,F730008N07Rik	---	329260	0.849548	0.825396	0.438805	0.562547	0.793555	1.28803	0.886887	0.955734	0.780599	0.705386
GSMG0000850	chr1:138977656-138979246	4930596I21Rik	RIKEN cDNA 4930596I21 gene	---	ENSMUSG00000104900	78229	0	0	0	0	0	0.0602974	0	0	0	0
GSMG0000855	chr1:139379452-139402852	4933436E23Rik	RIKEN cDNA 4933436E23 gene	---	ENSMUSG00000103844	71209	0	0	0	0	0	0	0	0	0	0
GSMG0000856	chr1:139408277-139413864	Gm34816	predicted gene, 34816	---	ENSMUSG00000102661	102638197	0	0	0	0	0	0	0	0	0	0
GSMG0000857	chr1:139422381-139453007	Zbtb41	zinc finger and BTB domain containing 41	8430415N23Rik,9430031N01,9830132G07Rik,AI316857	ENSMUSG00000033964	226470	6.69436	3.85108	3.75848	4.89943	4.35086	7.18749	4.86242	5.64033	5.21995	5.43754
GSMG0000859	chr1:139454771-139494090	Aspm	abnormal spindle microtubule assembly	A,Calm,Calmbp1,D330028K02Rik,MCPH,MCPH5,Sh,Sha1	ENSMUSG00000033952	12316	0	0	0	0	0.00581379	0.0106461	0.010736	0.00409663	0.00190041	0
GSMG0000860	chr1:139501707-139523756	F13b	coagulation factor XIII, beta subunit	Cf-13b,Cf13b	ENSMUSG00000026368	14060	0	0	0	0	0	0	0	0	0	0
GSMG0000861	chr1:140266487-140269852	---	---	---	---	---	0	0	0	0	0	0	0	0	0	0
GSMG0000862	chr1:140245718-140614045	Kcnt2	potassium channel, subfamily T, member 2	E330038N15Rik,Slick	---	240776	0	0.0826657	0.443523	0.0427374	0	0.032361	0.289144	0.00783059	0	0.315122
GSMG0000864	chr1:143640695-143654612	B3galt2	UDP-Gal:betaGlcNAc beta 1,3-galactosyltransferase, polypeptide 2	---	ENSMUSG00000033849	26878	5.94697	3.45385	4.75209	4.29318	4.2325	4.65201	4.17798	3.7818	3.32115	3.94746
GSMG0000865	chr1:143663828-143666854	---	---	---	---	---	0	0	0	0	0	0	0	0	0	0
GSMG0000866	chr1:143716338-143749678	Glrx2	glutaredoxin 2 (thioltransferase)	1700010P22Rik,AI645710,Grx,Grx2	---	69367	10.8277	7.52591	12.6478	11.8428	10.4592	10.2872	10.4665	10.4982	10.1937	10.5605
GSMG0000867	chr1:143777278-143807466	Uchl5	ubiquitin carboxyl-terminal esterase L5	5830413B11Rik,Uch37	---	56207	41.3128	29.2738	35.6688	40.2867	30.6216	36.2843	31.8982	31.9888	29.7369	31.1043
GSMG0000868	chr1:143778110-143781304	---	---	---	---	---	2.20862	1.81065	2.58993	2.36686	2.61946	3.41127	2.32727	2.80683	2.81665	2.19152
GSMG0000869	chr1:146494758-146902472	Brinp3	bone morphogenetic protein/retinoic acid inducible neural specific 3	B830045N13Rik,Fam5,Fam5c	---	215378	0.61364	0.434084	6.3488	4.41728	0.5078	0.810092	5.01671	2.04982	1.43578	4.57646
GSMG0000870	chr1:146804601-146807340	---	---	---	---	---	0	0	0	0	0	0	0	0	0	0
GSMG0000871	chr1:147089037-147090935	---	---	---	---	---	0	0	0	0	0	0	0	0	0	0
GSMG0000872	chr1:147515726-147520264	---	---	---	---	---	0	0	0	0	0	0	0	0	0	0
GSMG0000873	chr1:150100031-150108234	Ptgs2	prostaglandin-endoperoxide synthase 2	COX,Cox-,Cox-2,COX2,gripghs,PES-2,Pgh,PGHS,PGHS-2,Pghs2,PHS,PHS-2,PHSII,Tis,TIS10	ENSMUSG00000032487	19225	0.0724243	0.0122735	0.221535	0.0654133	0.0213976	0.032979	0.223505	0.0853921	0.0672799	0.2091
GSMG0000874	chr1:150319416-150333906	Pdc	phosducin	Pd,R,Rp,Rpr-1,Rpr1	---	20028	0	0	0	0	0	0	0	0	0	0
GSMG0000875	chr1:150324534-150326687	---	---	---	---	---	0	0	0	0	0	0	0	0	0	0
GSMG0000876	chr1:150392835-150449935	Tpr	translocated promoter region, nuclear basket protein	2610029M07Rik,C77892	ENSMUSG00000006005	108989	0.326363	0.728971	0.1646	0.136911	0.550992	3.64832	3.30502	0.627725	0.95055	0.777123
GSMG0000877	chr1:150625260-150783499	---	---	---	---	---	0	0	0	0	0	0	0	0	0	0
GSMG0000878	chr1:151138034-151144095	C730036E19Rik	RIKEN cDNA C730036E19 gene	lncLSTR	---	402734	0.0614354	0.0389132	0	0.0391354	0	0.00150111	0.0317974	0.0382749	0.00710091	0
GSMG0000879	chr1:151204119-151205796	3110040M04Rik	RIKEN cDNA 3110040M04 gene	---	---	73176	0	0	0	0	0	0	0	0	0	0
GSMG0000880	chr1:151344486-151364445	Ivns1abp	influenza virus NS1A binding protein	1190004M08Rik,1700126I16Rik,AA960440,HSPC0,HSPC068,mKIAA0850,ND,ND1,Nd1-L,Nd1-S,NS,NS-1,NS1,NS1-BP	---	117198	61.8412	47.7537	50.2771	58.7446	54.5365	54.3292	50.9247	60.0601	52.2251	47.7524
GSMG0000881	chr1:151367919-151369183	---	---	---	---	---	0	0	0	0	0	0	0	0	0.0295946	0
GSMG0000882	chr1:151428541-151458183	Trmt1l	tRNA methyltransferase 1 like	1190005F20Rik,AW226554,C1orf25,Trm1-l,Trm1-like,Trm1l	ENSMUSG00000053286	98685	9.92393	8.48719	5.85581	7.15549	7.0498	8.1925	8.72742	7.3378	6.96582	8.17736
GSMG0000883	chr1:151445305-151447741	---	---	---	---	---	0	0	0	0	0	0.00860256	0	0	0.0307123	0
GSMG0000884	chr1:151571373-151721425	Niban1	niban apoptosis regulator 1	AI256368,AU019833,Fam12,Fam129a,N,Niban	ENSMUSG00000026483	63913	0.13729	0.0601793	0.0982634	0.131301	0.0450889	0.151966	0.166455	0.116338	0.0667901	0.0796535
GSMG0000885	chr1:151755371-151822328	Edem3	ER degradation enhancer, mannosidase alpha-like 3	2310050N11Rik	---	66967	7.14114	8.16427	4.39569	5.33786	4.77246	9.01878	8.87507	5.37948	5.13693	5.91419
GSMG0000886	chr1:151762025-151762887	---	---	---	---	---	0	0	0	0	0	0	0	0	0	0
GSMG0000887	chr1:151767179-151768925	---	---	---	---	---	0	0	0	0	0	0	0	0	0	0
GSMG0000888	chr1:151960708-151963190	---	---	---	---	---	0	0	0	0	0	0	0	0	0	0
GSMG0000889	chr1:152399828-152511187	Colgalt2	collagen beta(1-O)galactosyltransferase 2	AI427652,D730024P12,Glt25d,Glt25d2	ENSMUSG00000032649	269132	1.69424	1.86391	1.88547	1.48046	1.39179	2.83009	1.75073	2.06164	1.74667	1.95413
GSMG0000890	chr1:152750551-152757544	Apobec4	apolipoprotein B mRNA editing enzyme, catalytic polypeptide-like 4 (putative)	4933431M11Rik	ENSMUSG00000055547	71281	0	0	0	0	0	0	0	0	0	0
GSMG0000891	chr1:152763788-152764200	---	---	---	---	---	0	0	0	0	0	0	0	0	0	0
GSMG0000892	chr1:152766542-152775580	Arpc5	actin related protein 2/3 complex, subunit 5	5830443F10Rik,p16-,p16-Arc	ENSMUSG00000008475	67771	42.1195	28.6638	80.0462	61.5148	51.338	34.4167	42.1115	47.4744	44.0403	49.8325
GSMG0000893	chr1:152800153-152836991	Ncf2	neutrophil cytosolic factor 2	Ncf-,Ncf-2,NO,NOXA2,p67p,p67phox	ENSMUSG00000026480	17970	0	0.00509022	0.0517492	0.00938413	0.00514841	0.0227722	0.0311783	0.0848682	0.034307	0
GSMG0000894	chr1:152903456-152905229	---	---	---	---	---	0.117485	0.039968	0.0232048	0.130655	0.0215151	0.342763	0.129907	0.125491	0.042197	0.0498514
GSMG0000895	chr1:152934805-152937046	1700040K01Rik	RIKEN cDNA 1700040K01 gene	Gm29954	---	102631675	0	0	0	0	0	0	0	0	0	0
GSMG0000896	chr1:152954990-153119265	Nmnat2	nicotinamide nucleotide adenylyltransferase 2	AI843915,D030041I09Rik,PN,PNAT1,PNAT2	ENSMUSG00000042751	226518	36.5512	43.2308	22.3499	24.6171	27.442	53.2853	55.8674	35.3898	33.5019	37.9211
GSMG0000897	chr1:153064117-153066120	---	---	---	---	---	0	0	0	0	0	0	0.0209072	0	0	0
GSMG0000898	chr1:153425162-153452574	Shcbp1l	Shc SH2-domain binding protein 1-like	1700012A16Rik	ENSMUSG00000042708	71836	0.0330617	0.0219788	0.0818718	0.0210609	0	0.0321113	0.0575678	0.0309516	0.0458567	0.0235083
GSMG0000899	chr1:153653037-153697667	Rgs8	regulator of G-protein signaling 8	6530413N01Rik	---	67792	1.94411	2.18501	1.52164	2.08684	2.64812	2.64654	3.65338	2.21687	2.77282	2.52741
GSMG0000900	chr1:153714650-153716569	---	---	---	---	---	0	0	0	0	0	0	0	0	0	0
GSMG0000901	chr1:153740351-153745468	Rgs16	regulator of G-protein signaling 16	R,Rgs14,Rgsr	ENSMUSG00000026475	19734	2.49508	2.76149	1.73081	1.61717	2.30543	3.34911	4.66688	2.71366	2.69389	2.35433
GSMG0000902	chr1:153749425-153764221	Rnasel	ribonuclease L (2', 5'-oligoisoadenylate synthetase-dependent)	E230029I04Rik	ENSMUSG00000066800	24014	2.19051	2.22868	1.39667	1.74274	1.78791	3.55046	3.55113	2.31764	2.13924	1.9863
GSMG0000903	chr1:153874343-153876871	Teddm1b	transmembrane epididymal protein 1B	EG433365,Gm5531	ENSMUSG00000043282	433365	0	0	0	0	0	0	0	0	0.0295946	0
GSMG0000904	chr1:153891646-153893060	Teddm1a	transmembrane epididymal protein 1A	e9-1,Epdd,Epdd1,Teddm1	ENSMUSG00000047053	240819	0	0	0	0	0	0	0	0	0	0
GSMG0000905	chr1:153899929-153909721	Glul	glutamate-ammonia ligase (glutamine synthetase)	G,Glns,GS	ENSMUSG00000026473	14645	120.961	165.584	99.44	124.889	138.62	127.068	106.077	133.325	142.565	130.846
GSMG0000907	chr1:154255687-154270416	4930532M18Rik	RIKEN cDNA 4930532M18 gene	---	ENSMUSG00000100221	75233	0	0	0	0	0	0	0	0	0	0
GSMG0000908	chr1:155097557-155097952	---	---	---	---	---	0	0	0	0	0.0965727	0	0	0.195207	0.289283	0.155853
GSMG0000909	chr1:155158703-155208256	Stx6	syntaxin 6	2310039E05Rik,2410005I16Rik,AA437559,AI415714,AI845861	---	58244	34.0367	35.6727	45.2349	41.4441	37.1921	34.2417	43.1038	38.605	35.3758	41.2181
GSMG0000910	chr1:155558117-155687233	Acbd6	acyl-Coenzyme A binding domain containing 6	0610010G04Rik,2610100E10Rik	---	72482	29.1187	28.2778	33.7443	28.6599	32.0924	24.8846	28.6414	28.4931	27.8633	28.2187
GSMG0000913	chr1:155973317-155974506	---	---	---	---	---	0	0.0153049	0	0.144495	0.0320826	0.0352495	0.0176103	0.10207	0.141576	0
GSMG0000914	chr1:155977825-155978240	---	---	---	---	---	0	0	0	0	0	0	0	0	0	0
GSMG0000915	chr1:156035402-156068861	Tor1aip2	torsin A interacting protein 2	1110020D10Rik,15kD,15kDa,A130072J07,AA103493,AW060462,AW610675,C77739,Ifrg,Ifrg15,LU,Lull1	---	240832	8.77246	6.73009	7.14188	8.01346	7.6145	6.69736	5.6415	7.11981	6.56292	6.74616
GSMG0000916	chr1:156303486-156304959	---	---	---	---	---	0	0	0	0.0233271	0.0517939	0.0426799	0.0284299	0.0411954	0	0.0260378
GSMG0000917	chr1:156310719-156328035	Nphs2	nephrosis 2, podocin	PDCN,po,SRN1	ENSMUSG00000026602	170484	0	0.0350402	0	0	0	0	0.00671971	0	0	0
GSMG0000918	chr1:156364849-156365831	---	---	---	---	---	0	0	0	0	0	0	0	0	0	0
GSMG0000919	chr1:156406991-156409024	---	---	---	---	---	0	0	0	0	0	0	0	0	0	0
GSMG0000920	chr1:156455288-156457852	---	---	---	---	---	0	0	0	0	0	0	0	0	0	0
GSMG0000921	chr1:156525611-156526662	---	---	---	---	---	8.89881	9.01534	3.92693	4.32345	3.34054	5.49808	4.42551	4.70162	3.70618	3.33478
GSMG0000922	chr1:156558787-156649619	Abl2	v-abl Abelson murine leukemia viral oncogene 2 (arg, Abelson-related gene)	A,AA536808,Abll,Arg	---	11352	3.43766	4.08567	2.78854	2.70507	2.84786	5.8136	5.31795	4.01302	3.60291	4.13613
GSMG0000923	chr1:156583108-156588248	---	---	---	---	---	0	0	0	0	0	0.016308	0.00407366	0.0039352	0	0
GSMG0000924	chr1:156592841-156595881	---	---	---	---	---	0	0	0	0	0	0	0	0	0.00615257	0
GSMG0000926	chr1:156655305-156655732	---	---	---	---	---	0	0	0	0	0	0	0	0	0	0
GSMG0000927	chr1:156678545-156678942	---	---	---	---	---	0.0435915	0	0	0.0710599	0	0.131531	0	0	0.0790823	0.199681
GSMG0000928	chr1:156680755-156680925	---	---	---	---	---	0.207577	0	0	0.0505306	0.0546114	0.0701745	0	0.3016	0.881027	0.068664
GSMG0000929	chr1:156838913-156861076	Angptl1	angiopoietin-like 1	2810039D03Rik,A,AN,ANG,ANG3,ANGPT3,ANGY,ARP1	ENSMUSG00000033544	72713	0.0235239	0	0.00897125	0.0286295	0.00964003	0	0.00991769	0.0441058	0.0244707	0.0669058
GSMG0000930	chr1:156939838-156940194	---	---	---	---	---	0.583995	0.0545126	0.115568	0.0538526	0.340617	0.18673	0.0962095	0.349426	0.262694	0
GSMG0000931	chr1:157043546-157045849	---	---	---	---	---	0	0	0	0	0	0	0	0	0	0
GSMG0000932	chr1:157412352-157420236	2810025M15Rik	RIKEN cDNA 2810025M15 gene	AI429618	ENSMUSG00000049881	69953	7.68838	5.17582	8.56956	7.57863	6.46215	5.1043	7.30209	5.81507	6.56287	7.1397
GSMG0000933	chr1:157458568-157492638	Cryzl2	crystallin zeta like 2	---	---	226527	0	0.0175171	0.100042	0.111932	0.0817059	0.132113	0.106279	0.170366	0.215339	0.133218
GSMG0000934	chr1:157506796-157568422	Sec16b	SEC16 homolog B (S. cerevisiae)	Lzt,Lztr2,R,Rgpr,Rgpr-,Rgpr-p117	---	89867	0.0232351	0.0078387	0.0177222	0.0333026	0	0.0360664	0.0810381	0.0217822	0.0160591	0.0619541
GSMG0000935	chr1:158362304-158691786	Astn1	astrotactin 1	Astn,GC14,mKIAA0289	---	11899	17.1664	30.0538	17.1358	16.825	18.0635	28.8417	27.3958	26.3445	25.3432	29.8576
GSMG0000936	chr1:158375936-158378804	---	---	---	---	---	0	0	0	0	0	0	0.00730077	0	0	0
GSMG0000937	chr1:158534807-158537408	---	---	---	---	---	0	0	0.0236578	0	0.014666	0	0	0	0	0
GSMG0000938	chr1:159232200-159354872	Cop1	COP1, E3 ubiquitin ligase	AI316802,C80879,Co,Rfwd,Rfwd2	ENSMUSG00000040782	26374	1.47023	1.17877	1.92571	1.89815	1.45607	1.46667	1.56271	1.55234	1.38521	1.52253
GSMG0000939	chr1:159235710-159238558	---	---	---	---	---	0	0	0	0	0	0.0515066	0	0	0	0
GSMG0000940	chr1:159289059-159289807	---	---	---	---	---	0	0	0	0	0	0	0	0	0	0
GSMG0000941	chr1:159523768-159925292	Tnr	tenascin R	J1-ten,J1-tenascin,ja,janusin,rest,restrictin,TN,TN-R	ENSMUSG00000015829	21960	2.05854	5.59479	2.12011	1.83973	2.41001	7.82243	6.9739	3.89664	4.01297	5.86552
GSMG0000942	chr1:159595148-159597384	---	---	---	---	---	0	0	0	0	0	0	0	0	0	0
GSMG0000943	chr1:159614748-159684875	---	---	---	---	---	0	0	0	0	0	0	0	0	0	0
GSMG0000944	chr1:159930183-159931726	---	---	---	---	---	1.92215	3.8215	1.70171	1.79623	2.29909	10.1018	6.42965	3.26903	3.92603	3.66342
GSMG0000945	chr1:160044380-160080208	4930523C07Rik	RIKEN cDNA 4930523C07 gene	---	---	67647	0	0.0259668	0.0322891	0.00490309	0	0.0148944	0.0119513	0.0172881	0.0133446	0.0109457
GSMG0000946	chr1:160195215-160202170	Mrps14	mitochondrial ribosomal protein S14	1810032L21Rik,AL022847,Rpm,Rpms14	---	64659	32.2434	25.6522	36.1472	37.438	32.4334	20.4718	21.2015	27.4964	28.0319	24.8285
GSMG0000947	chr1:160212969-160214816	---	---	---	---	---	0	0	0	0	0	0	0	0	0.0202532	0
GSMG0000948	chr1:160264322-160443072	---	---	---	---	---	0	0	0	0	0	0	0	0	0	0
GSMG0000949	chr1:160755687-160759689	---	---	---	---	---	0	0	0	0	0	0	0	0	0	0
GSMG0000950	chr1:160906411-160974976	Rc3h1	RING CCCH (C3H) domains 1	5730557L09Rik,Gm551,mKIAA2025,N28103,ro	ENSMUSG00000040423	381305	3.24608	3.54091	2.70921	3.91773	3.79234	5.32036	4.07446	4.83947	4.50919	4.94463
GSMG0000955	chr1:160978583-161003010	Serpinc1	serine (or cysteine) peptidase inhibitor, clade C (antithrombin), member 1	A,AI114908,At,At-,At-3,At3,ATIII	ENSMUSG00000026715	11905	0	0	0.00492602	0	0	0	0	0	0	0
GSMG0000956	chr1:160985758-160986929	---	---	---	---	---	0	0	0	0	0	0	0	0	0	0
GSMG0000957	chr1:161034601-161038539	Gas5	growth arrest specific 5	Gas,Gas-5,Mir5117,Snh,Snhg2	ENSMUSG00000053332	14455	28.486	24.9622	35.5222	34.6284	25.019	14.945	26.7352	27.9854	31.1444	31.1496
GSMG0000959	chr1:161072404-161072993	---	---	---	---	---	0	0	0	0	0	0	0	0	0	0
GSMG0000960	chr1:161142697-161170507	Ankrd45	ankyrin repeat domain 45	4933409K03Rik	---	73844	28.38	29.0754	26.8786	32.3561	29.2007	28.3754	31.6607	25.8567	26.838	28.8084
GSMG0000961	chr1:161395438-161418206	Tnfsf4	tumor necrosis factor (ligand) superfamily, member 4	Ath,Ath-,Ath-1,Ath1,CD134,CD134L,gp3,gp34,OX-40L,OX4,Ox40l,Tnlg2b,Txgp,TXGP1,Txgp1l	ENSMUSG00000026700	22164	0	0	0	0	0	0	0	0	0	0
GSMG0000962	chr1:161494655-161506334	Tnfsf18	tumor necrosis factor (ligand) superfamily, member 18	Gi,Gitrl,Tnlg2a	ENSMUSG00000066755	240873	0	0	0	0	0	0	0	0	0	0
GSMG0000963	chr1:161713705-161714827	---	---	---	---	---	0	0	0	0	0	0	0	0	0	0
GSMG0000964	chr1:161890447-161900913	---	---	---	---	---	0	0	0	0	0	0	0	0	0	0
GSMG0000965	chr1:161969188-161973435	Pigc	phosphatidylinositol glycan anchor biosynthesis, class C	3110030E07Rik,AW212108	---	67292	3.92412	3.16885	4.15037	4.06526	3.73891	3.10955	3.09354	3.6151	3.62101	2.95837
GSMG0000966	chr1:162004967-162016487	2810442N19Rik	RIKEN cDNA 2810442N19 gene	---	ENSMUSG00000090260	72753	0	0	0	0	0	0	0	0	0	0
GSMG0000967	chr1:162217623-162225550	Mir214 // Dnm3os // Mir199a-2	microRNA 214 // dynamin 3, opposite strand // microRNA 199a-2	6030416H16Rik,Hag,Hag2,mir-199a-2,mir-214,Mirn,Mirn19,Mirn199a-2,Mirn214,mmu-mir-2,mmu-mir-214,N,Npn1,P/L,P/L01	ENSMUSG00000065516,ENSMUSG00000070126,ENSMUSG00000078190	387210,474332,723821	0	0	0	0	0	0	0	0	0	0
GSMG0000968	chr1:162477679-162479943	---	---	---	---	---	0	0	0	0	0.00842452	0	0	0	0.0082614	0.0169407
GSMG0000969	chr1:162570515-162599082	Vamp4	vesicle-associated membrane protein 4	D1Ertd147,D1Ertd147e,Vamp-4	---	53330	17.5609	14.0505	21.0778	21.4758	18.2818	17.0583	16.4507	18.9934	16.8518	17.7636
GSMG0000970	chr1:162639150-162649693	Myoc	myocilin	AI957332,GLC,GLC1A,TI,TIGR	ENSMUSG00000026697	17926	0	0.0350627	0.049545	0.0165515	0.0183749	0.0504717	0.0907743	0.0584266	0.117092	0.101612
GSMG0000971	chr1:162867098-162869556	---	---	---	---	---	0	0	0	0	0	0	0	0	0	0
GSMG0000972	chr1:163108993-163110975	---	---	---	---	---	0	0	0	0	0	0	0	0	0	0
GSMG0000973	chr1:163779581-163917106	Kifap3	kinesin-associated protein 3	KA,KAP-3,KAP3,SMAP	---	16579	91.0872	97.3293	82.6459	90.6916	79.046	109.695	87.0053	93.796	89.247	93.9919
GSMG0000974	chr1:163876469-163877648	---	---	---	---	---	0	0	0	0	0.00647094	0.0177742	0	0	0	0
GSMG0000975	chr1:163888361-163890695	---	---	---	---	---	0	0	0.00881365	0	0.0163437	0	0	0	0	0
GSMG0000976	chr1:163906886-163909693	---	---	---	---	---	0	0	0	0	0	0.0447934	0	0	0.00666327	0
GSMG0000977	chr1:163929098-163955126	Scyl3	SCY1-like 3 (S. cerevisiae)	1200016D23Rik,6030457O16,AW214499,Pac,Pace1	---	240880	4.18842	4.21451	3.44183	4.78408	3.46	5.89118	7.67051	4.91969	4.22722	4.28395
GSMG0000978	chr1:163994887-163997312	Mettl18	methyltransferase like 18	2810422O20Rik,C78571	---	69962	5.04792	4.44959	6.00138	5.83682	5.04121	3.49156	2.92997	4.39338	4.08773	3.61448
GSMG0000979	chr1:164048215-164058486	Sele	selectin, endothelial cell	CD62E,E-sele,E-selectin,El,Elam,ELAM-1,LECAM2	ENSMUSG00000026582	20339	0.0603744	0	0.0459797	0.0604364	0.042511	0.0534174	0.0401764	0.00669544	0.0178685	0.0245307
GSMG0000980	chr1:164062074-164080785	Sell	selectin, lymphocyte	AI528707,CD62,CD62L,L,L-sel,L-selectin,LECAM,LECAM-1,Lnhr,Ly-2,Ly-22,Ly-m2,Ly-m22,Lya,Lyam,Lyam-1,Lyam1	---	20343	0	0	0	0	0	0	0	0	0	0
GSMG0000981	chr1:164115264-164150026	Selp	selectin, platelet	CD62,CD62P,GMP-140,Gr,Grmp,LECAM3,P-sel,PADGEM	ENSMUSG00000026580	20344	0	0	0	0	0	0	0	0	0	0
GSMG0000982	chr1:164151831-164220277	F5	coagulation factor V	AI173222,Cf-5,Cf5	ENSMUSG00000026579	14067	0	0	0	0	0	0	0	0	0	0
GSMG0000983	chr1:164249045-164265385	Slc19a2	solute carrier family 19 (thiamine transporter), member 2	AV276020,AW322295,DDA,DDA1,THTR,ThTr-1,THTR1,TR,TRMA	---	116914	3.07956	2.61348	2.937	3.40607	3.23392	2.99085	2.64053	2.51193	2.7672	3.12085
GSMG0000984	chr1:164275598-164287845	Ccdc181	coiled-coil domain containing 181	4930455F23Rik,AI427889	ENSMUSG00000026578	74895	6.99505	8.31118	8.83926	7.67274	7.80403	10.2894	11.0123	8.00301	7.92235	8.10471
GSMG0000985	chr1:164276198-164276423	---	---	---	---	---	0	0	0	0.0462359	0.00084208	0.314877	0	0.0964462	0.0209196	0
GSMG0000986	chr1:164304120-164437725	Nme7	NME/NM23 family member 7	D530024H21Rik,Nm23-M,Nm23-M7,Nm23-r7	---	171567	6.5878	6.54136	6.52802	7.35392	4.89273	6.39416	6.36514	6.02631	5.17749	6.69644
GSMG0000989	chr1:164503306-164514882	Gm26685	predicted gene, 26685	---	ENSMUSG00000097281	102635083	0.053327	0.0178501	0.0305058	0.0424627	0.0454769	0.0343692	0.039002	0.019997	0	0.00947942
GSMG0000990	chr1:164575452-164578553	---	---	---	---	---	0	0.00586828	0	0.0443223	0.0335027	0.0202733	0.0236541	0.0228727	0.0120631	0.0309205
GSMG0000991	chr1:164796643-164824274	Dpt	dermatopontin	1810032B19Rik,5033416F05Rik,EQ-1,Eq1	ENSMUSG00000026574	56429	0	0.0210498	0	0	0.0330939	0.0484808	0.0241418	0	0	0
GSMG0000992	chr1:164863121-164936777	Gm20743	predicted gene, 20743	---	ENSMUSG00000104117	433374	0.0437174	0.00435557	0.00492366	0.0123363	0	0.0250788	0.012861	0.0242065	0	0
GSMG0000993	chr1:164960887-164962837	1700029M03Rik	RIKEN cDNA 1700029M03 gene	---	---	69476	0	0	0	0	0	0	0	0	0	0
GSMG0000994	chr1:165295766-165326745	Gpr161	G protein-coupled receptor 161	Gm208,Gm208Gpr,vl	---	240888	1.04177	2.17635	1.07624	1.0372	1.57	3.34238	2.5453	1.87856	1.45922	1.73053
GSMG0000996	chr1:165379519-165381074	---	---	---	---	---	0	0	0	0	0	0	0	0	0	0
GSMG0000997	chr1:165460636-165481218	Mpc2	mitochondrial pyruvate carrier 2	0610006C01Rik,2010002I07Rik,2610205H19Rik,AA108335,Brp,Brp44,ESTM4,ESTM43	ENSMUSG00000026568	70456	40.3695	30.1084	50.3872	44.5466	46.2993	25.9947	28.5181	34.5079	35.3757	31.5472
GSMG0000998	chr1:165467500-165468535	---	---	---	---	---	0	0	0	0	0	0	0	0	0	0
GSMG0000999	chr1:165485180-165576773	Adcy10	adenylate cyclase 10	4930431D04Rik,4931412F17,s,Sa,sAC,Sacy	---	271639	0	0	0	0	0	0	0	0	0.0105664	0
GSMG0001000	chr1:165585179-165585991	---	---	---	---	---	0	0	0	0	0	0	0	0	0	0
GSMG0001001	chr1:165721556-165722777	---	---	---	---	---	0	0	0	0	0	0	0	0	0	0
GSMG0001002	chr1:165763758-165775305	Creg1	cellular repressor of E1A-stimulated genes 1	AA755314,Cre,Creg	---	433375	35.1718	33.806	29.7809	33.9185	34.3162	32.8557	32.0263	36.7778	38.7385	34.3076
GSMG0001003	chr1:165788679-165877276	Cd247	CD247 antigen	4930549J05Rik,A430104F18,A430104F18Rik,AW552088,Cd3,CD3-et,Cd3-eta,CD3-zet,Cd3-zeta,Cd3h,Cd3z,CD3zet,Cd3zeta,T3z,TCR,Tcrk,Tcrz	---	12503	0	0	0	0	0	0	0.0167777	0	0	0
GSMG0001004	chr1:165797393-165800928	---	---	---	---	---	0	0	0	0	0	0	0	0	0	0
GSMG0001005	chr1:165801315-165806324	---	---	---	---	---	0	0	0	0	0	0	0	0	0	0
GSMG0001006	chr1:165872053-165875280	---	---	---	---	---	0	0	0	0	0	0	0	0	0	0.00594263
GSMG0001007	chr1:166002956-166038258	---	---	---	---	---	0	0	0	0	0	0	0	0	0	0
GSMG0001008	chr1:166130221-166166510	Gpa33	glycoprotein A33 (transmembrane)	2010310L10Rik,2210401D16Rik,BB116197,mA33	---	59290	0.0294113	0.0198447	0	0	0	0	0.00761127	0	0	0
GSMG0001009	chr1:166254139-166316832	Ildr2	immunoglobulin-like domain containing receptor 2	2810478N18Rik,3110063L10Rik,AI852300,D1Ertd471,D1Ertd471e,Dbsm,Dbsm1,Ll	---	100039795	0.414306	1.20452	2.6436	1.11336	1.01831	1.76396	4.6539	1.05051	1.05925	2.68286
GSMG0001010	chr1:166297199-166299861	---	---	---	---	---	0	0	0	0	0	0.0472333	0.0707917	0.0151968	0.0351311	0
GSMG0001011	chr1:166301442-166303422	---	---	---	---	---	0.0136213	0.00919068	0	0	0	0.0211675	0.125946	0	0	0.00968528
GSMG0001012	chr1:166379167-166393618	Tada1	transcriptional adaptor 1	2900026B15Rik,D1Ertd251e,Staf42,Tad,Tada1l	ENSMUSG00000026563	27878	22.6689	22.9906	26.0444	26.0613	22.8323	20.4737	23.7882	24.5983	21.8533	26.2417
GSMG0001013	chr1:167001417-167091302	Fam78b	family with sequence similarity 78, member B	C030014K22Rik,C030020L09Rik	---	226610	4.26113	3.61204	3.14256	3.21047	4.1165	4.76379	5.28285	3.88017	4.24096	4.85604
GSMG0001014	chr1:167040722-167042946	---	---	---	---	---	0	0	0	0	0	0	0	0	0	0
[truncated: 55,734 more rows]

## Sheet: PV_DGE
Genes analysis results PV
[truncated: 12,691 more rows]

## Sheet: FPKM_PV
Gene expression (FPKM) in PV neurons
[truncated: 56,638 more rows]
