# Supplementary material for: Dilated cardiomyopathy-associated RNA Binding Motif Protein 20 regulates long pre-mRNAs in neurons
Source: bioRxiv preprint, doi:10.1101/2023.12.06.570345, version 3 (2025-01-20)
Supplement: Supplementary Table 5 [file 570345_file18.xlsx]

## Sheet: EXON_ANALYSIS_OB
Exons analysis results OB
Gene Symbol	Exon	Gene start	Gene end	FC	P-value	Gene Coordinates	Gene Name	EnsEMBL ID	ALT_POLYA	3PACCEPT	ALT_TSS	COMPLEX	INT_RET	SKIP	5PDONOR	EID	MX	Chromosome	Strand	Start position	End position	Microexon	Constitutive
Tcea1	e1.0	1	283	-1.2046	0.201529	chr1:4857694-4897906	transcription elongation factor A (SII) 1	---	0	0	1	0	0	0	0	0	0	chr1	+	4857694	4857976	0	0
Tcea1	e2.0	344	810	-1.00515	0.993865	chr1:4857694-4897906	transcription elongation factor A (SII) 1	---	0	0	1	0	0	0	0	0	0	chr1	+	4858037	4858503	0	0
Rb1cc1	e2.0	13281	13390	-1.57408	0.463362	chr1:6214660-6276365	RB1-inducible coiled-coil 1	---	0	0	1	0	0	0	0	0	0	chr1	+	6227940	6228049	0	0
Rb1cc1	e3.0	15300	15414	1.11242	0.676454	chr1:6214660-6276365	RB1-inducible coiled-coil 1	---	0	0	1	0	0	0	0	0	0	chr1	+	6229959	6230073	0	0
Rb1cc1	e4.0	19302	19428	-1.15435	0.594124	chr1:6214660-6276365	RB1-inducible coiled-coil 1	---	1	0	1	0	0	0	0	0	0	chr1	+	6233961	6234087	0	0
Rb1cc1	e5.0	19570	19740	-1.02595	0.933624	chr1:6214660-6276365	RB1-inducible coiled-coil 1	---	1	0	1	0	0	0	0	0	0	chr1	+	6234229	6234399	0	0
Rb1cc1	e6.0	23603	23805	-1.12217	0.710682	chr1:6214660-6276365	RB1-inducible coiled-coil 1	---	1	0	1	0	0	0	0	0	0	chr1	+	6238262	6238464	0	0
Rb1cc1	e7.0	25293	25719	-1.43858	0.0364963	chr1:6214660-6276365	RB1-inducible coiled-coil 1	---	1	0	1	0	0	0	0	0	0	chr1	+	6239952	6240378	0	0
Rb1cc1	e8.0	29446	29616	-1.1133	0.62339	chr1:6214660-6276365	RB1-inducible coiled-coil 1	---	1	0	1	0	0	0	0	0	0	chr1	+	6244105	6244275	0	0
Rb1cc1	e10.0	30499	30685	1.02253	0.875076	chr1:6214660-6276365	RB1-inducible coiled-coil 1	---	1	0	1	0	0	0	0	0	0	chr1	+	6245158	6245344	0	0
Rb1cc1	e11.0	30766	30847	-1.01527	0.839199	chr1:6214660-6276365	RB1-inducible coiled-coil 1	---	1	0	1	0	0	0	0	0	0	chr1	+	6245425	6245506	0	0
Rb1cc1	e12.0	30939	31000	1.35571	0.217006	chr1:6214660-6276365	RB1-inducible coiled-coil 1	---	1	0	1	0	0	0	0	0	0	chr1	+	6245598	6245659	0	0
Rb1cc1	e13.0	33047	33150	1.49735	0.0801059	chr1:6214660-6276365	RB1-inducible coiled-coil 1	---	1	0	1	0	0	0	0	0	0	chr1	+	6247706	6247809	0	0
Rb1cc1	e14.0	33407	33533	-1.02611	0.858786	chr1:6214660-6276365	RB1-inducible coiled-coil 1	---	1	0	1	0	0	0	0	0	0	chr1	+	6248066	6248192	0	1
Rb1cc1	e15.0	33617	35508	1.01439	0.800119	chr1:6214660-6276365	RB1-inducible coiled-coil 1	---	1	0	1	0	0	0	0	0	0	chr1	+	6248276	6250167	0	0
Rb1cc1	e16.0	46271	46436	1.04571	0.735043	chr1:6214660-6276365	RB1-inducible coiled-coil 1	---	1	0	1	0	0	0	0	0	0	chr1	+	6260930	6261095	0	0
Rb1cc1	e17.0	48175	48283	-1.02842	0.892418	chr1:6214660-6276365	RB1-inducible coiled-coil 1	---	1	0	1	0	0	0	0	0	0	chr1	+	6262834	6262942	0	0
Rb1cc1	e18.0	48365	48605	1.03533	0.754564	chr1:6214660-6276365	RB1-inducible coiled-coil 1	---	1	0	1	0	0	0	0	0	0	chr1	+	6263024	6263264	0	0
Rb1cc1	e19.0	49883	49931	1.12606	0.48538	chr1:6214660-6276365	RB1-inducible coiled-coil 1	---	1	0	1	0	0	0	0	0	0	chr1	+	6264542	6264590	0	0
Rb1cc1	e20.0	50915	50962	-1.02069	0.84861	chr1:6214660-6276365	RB1-inducible coiled-coil 1	---	1	0	1	0	0	0	0	0	0	chr1	+	6265574	6265621	0	0
Rb1cc1	e21.0	54039	54097	-1.2631	0.11836	chr1:6214660-6276365	RB1-inducible coiled-coil 1	---	1	0	1	0	0	0	0	0	0	chr1	+	6268698	6268756	0	1
Pcmtd1	e1.0	1	297	-1.20012	0.518186	chr1:7088920-7173631	protein-L-isoaspartate (D-aspartate) O-methyltransferase domain containing 1	ENSMUSG00000051285	0	0	1	0	0	0	0	0	0	chr1	+	7088920	7089216	0	0
Pcmtd1	e2.0	31275	31696	1.02777	0.6789	chr1:7088920-7173631	protein-L-isoaspartate (D-aspartate) O-methyltransferase domain containing 1	ENSMUSG00000051285	0	0	1	0	0	1	0	0	0	chr1	+	7120194	7120615	0	1
Pcmtd1	e3.0	58718	58820	-1.05378	0.584212	chr1:7088920-7173631	protein-L-isoaspartate (D-aspartate) O-methyltransferase domain containing 1	ENSMUSG00000051285	0	0	1	0	0	1	0	0	0	chr1	+	7147637	7147739	0	1
Pcmtd1	e4.0	71973	72144	-1.02092	0.782105	chr1:7088920-7173631	protein-L-isoaspartate (D-aspartate) O-methyltransferase domain containing 1	ENSMUSG00000051285	0	0	1	0	0	1	0	0	0	chr1	+	7160892	7161063	0	2
Pcmtd1	e5.0	74329	74452	1.05405	0.503591	chr1:7088920-7173631	protein-L-isoaspartate (D-aspartate) O-methyltransferase domain containing 1	ENSMUSG00000051285	0	0	1	0	0	1	0	0	0	chr1	+	7163248	7163371	0	2
Pcmtd1	e6.0	77486	77599	1.17729	0.412525	chr1:7088920-7173631	protein-L-isoaspartate (D-aspartate) O-methyltransferase domain containing 1	ENSMUSG00000051285	0	0	1	0	0	0	0	0	0	chr1	+	7166405	7166518	0	0
Sgk3	e4.0	67002	67219	-1.16695	0.499902	chr1:9798130-9903826	serum/glucocorticoid regulated kinase 3	---	1	0	1	0	0	0	0	0	0	chr1	+	9865131	9865348	0	1
Sgk3	e5.0	70254	70337	1.00058	0.997148	chr1:9798130-9903826	serum/glucocorticoid regulated kinase 3	---	1	0	1	0	0	0	0	0	0	chr1	+	9868383	9868466	0	1
Sgk3	e6.0	73501	73573	1.03876	0.862543	chr1:9798130-9903826	serum/glucocorticoid regulated kinase 3	---	1	0	1	0	0	0	0	0	0	chr1	+	9871630	9871702	0	2
Sgk3	e7.0	74129	74204	-1.33798	0.0717319	chr1:9798130-9903826	serum/glucocorticoid regulated kinase 3	---	1	0	1	0	0	0	0	0	0	chr1	+	9872258	9872333	0	2
Sgk3	e8.0	79037	79124	-1.19177	0.422404	chr1:9798130-9903826	serum/glucocorticoid regulated kinase 3	---	1	0	1	0	0	0	0	0	0	chr1	+	9877166	9877253	0	2
Sgk3	e9.0	80897	80946	1.18438	0.439438	chr1:9798130-9903826	serum/glucocorticoid regulated kinase 3	---	1	0	1	0	0	0	0	0	0	chr1	+	9879026	9879075	0	2
Sgk3	e10.0	82203	82260	1.51457	0.0813358	chr1:9798130-9903826	serum/glucocorticoid regulated kinase 3	---	1	0	1	0	0	0	0	0	0	chr1	+	9880332	9880389	0	2
Sgk3	e11.0	83449	83532	-1.14291	0.569775	chr1:9798130-9903826	serum/glucocorticoid regulated kinase 3	---	1	0	1	0	0	0	0	0	0	chr1	+	9881578	9881661	0	2
Sgk3	e12.0	83631	83762	-1.32884	0.163407	chr1:9798130-9903826	serum/glucocorticoid regulated kinase 3	---	1	0	1	0	0	0	0	0	0	chr1	+	9881760	9881891	0	2
Sgk3	e14.0	86278	86390	1.02891	0.864748	chr1:9798130-9903826	serum/glucocorticoid regulated kinase 3	---	1	0	1	0	0	0	0	0	0	chr1	+	9884407	9884519	0	2
Sgk3	e15.0	86496	86532	1.26803	0.152959	chr1:9798130-9903826	serum/glucocorticoid regulated kinase 3	---	1	0	1	0	0	0	0	0	0	chr1	+	9884625	9884661	0	2
Sgk3	e16.0	87538	87624	1.25055	0.114138	chr1:9798130-9903826	serum/glucocorticoid regulated kinase 3	---	1	0	1	0	0	0	0	0	0	chr1	+	9885667	9885753	0	2
Sgk3	e17.0	87918	88013	1.05316	0.754686	chr1:9798130-9903826	serum/glucocorticoid regulated kinase 3	---	1	0	1	1	0	0	0	0	0	chr1	+	9886047	9886142	0	2
Sgk3	e18.0	90741	90896	-1.0128	0.919537	chr1:9798130-9903826	serum/glucocorticoid regulated kinase 3	---	1	0	1	1	0	0	0	0	0	chr1	+	9888870	9889025	0	2
Cspp1	e1.0	1	358	2.28082	0.234295	chr1:10037987-10136768	centrosome and spindle pole associated protein 1	---	0	0	1	0	0	0	0	0	0	chr1	+	10037987	10038344	0	0
Cspp1	e3.0	7090	7198	1.08728	0.598768	chr1:10037987-10136768	centrosome and spindle pole associated protein 1	---	1	0	1	0	0	0	0	0	0	chr1	+	10045076	10045184	0	0
Cspp1	e5.0	9438	9540	1.09068	0.62806	chr1:10037987-10136768	centrosome and spindle pole associated protein 1	---	1	0	1	0	0	0	0	0	0	chr1	+	10047424	10047526	0	1
Cspp1	e6.0	20734	20837	-1.07466	0.817912	chr1:10037987-10136768	centrosome and spindle pole associated protein 1	---	1	0	1	0	0	0	0	0	0	chr1	+	10058720	10058823	0	1
Cspp1	e7.0	21838	21861	1.00066	0.997523	chr1:10037987-10136768	centrosome and spindle pole associated protein 1	---	0	0	1	0	0	1	0	0	0	chr1	+	10059824	10059847	1	0
Cspp1	e8.0	26347	26427	1.22839	0.27764	chr1:10037987-10136768	centrosome and spindle pole associated protein 1	---	1	0	1	0	0	0	0	0	0	chr1	+	10064333	10064413	0	1
Cspp1	e9.0	27337	27435	1.55437	0.0332695	chr1:10037987-10136768	centrosome and spindle pole associated protein 1	---	1	0	1	0	0	0	0	0	0	chr1	+	10065323	10065421	0	1
Cspp1	e10.0	28440	28834	-1.13395	0.0760062	chr1:10037987-10136768	centrosome and spindle pole associated protein 1	---	1	0	1	0	0	0	0	0	0	chr1	+	10066426	10066820	0	1
Rdh10	e2.0	2022	2257	-1.20642	0.417731	chr1:16105774-16132550	retinol dehydrogenase 10 (all-trans)	ENSMUSG00000025921	0	0	1	0	0	0	0	0	0	chr1	+	16107795	16108030	0	2
Rdh10	e3.0	22392	22490	-1.01207	0.954796	chr1:16105774-16132550	retinol dehydrogenase 10 (all-trans)	ENSMUSG00000025921	0	0	1	0	0	0	0	0	0	chr1	+	16128165	16128263	0	2
Rdh10	e4.0	23423	23568	1.07411	0.71558	chr1:16105774-16132550	retinol dehydrogenase 10 (all-trans)	ENSMUSG00000025921	0	0	1	0	0	0	0	0	0	chr1	+	16129196	16129341	0	2
Gdap1	e1.0	1	227	-1.17168	0.0910581	chr1:17145362-17164268	ganglioside-induced differentiation-associated-protein 1	ENSMUSG00000025777	0	0	1	0	0	0	0	0	0	chr1	+	17145362	17145588	0	0
Gdap1	e2.0	1575	1767	-1.00828	0.860924	chr1:17145362-17164268	ganglioside-induced differentiation-associated-protein 1	ENSMUSG00000025777	0	0	1	0	0	0	0	0	0	chr1	+	17146936	17147128	0	2
Gdap1	e3.0	11600	11773	1.00726	0.826313	chr1:17145362-17164268	ganglioside-induced differentiation-associated-protein 1	ENSMUSG00000025777	0	0	1	0	0	0	0	0	0	chr1	+	17156961	17157134	0	2
Paqr8	e1.0	1	139	1.12622	0.667489	chr1:20890548-20939650	progestin and adipoQ receptor family member VIII	---	0	0	1	0	0	0	0	0	0	chr1	+	20890548	20890686	0	0
Lmbrd1	e2.0	91964	92236	-1.1181	0.427762	chr1:24586581-24766299	LMBR1 domain containing 1	---	0	0	1	0	0	0	0	0	0	chr1	+	24678544	24678816	0	0
Lmbrd1	e3.0	92338	92454	1.48025	0.380378	chr1:24586581-24766299	LMBR1 domain containing 1	---	0	0	1	0	0	0	0	0	0	chr1	+	24678918	24679034	0	0
Rab23	e1.0	1	287	1.09559	0.503746	chr1:33719887-33742564	RAB23, member RAS oncogene family	---	0	0	1	0	0	0	0	0	0	chr1	+	33719887	33720173	0	0
Rab23	e3.0	1722	1813	-1.172	0.246894	chr1:33719887-33742564	RAB23, member RAS oncogene family	---	0	0	1	0	0	0	0	0	0	chr1	+	33721608	33721699	0	1
Rab23	e4.0	3900	4119	1.01548	0.781231	chr1:33719887-33742564	RAB23, member RAS oncogene family	---	0	0	1	0	0	0	0	0	0	chr1	+	33723786	33724005	0	1
Rab23	e5.0	5048	5133	-1.05357	0.650392	chr1:33719887-33742564	RAB23, member RAS oncogene family	---	0	0	1	0	0	0	0	0	0	chr1	+	33724934	33725019	0	2
Hs6st1	e1.0	1	806	-1.22266	0.231851	chr1:36068379-36107310	heparan sulfate 6-O-sulfotransferase 1	ENSMUSG00000045216	0	0	1	0	0	0	0	0	0	chr1	+	36068379	36069184	0	0
Zap70	e5.0	9992	10152	-1.31429	0.41772	chr1:36761798-36782820	zeta-chain (TCR) associated protein kinase	---	0	0	1	0	0	0	0	0	0	chr1	+	36771789	36771949	0	1
Zap70	e6.0	16356	16494	-1.00037	0.99964	chr1:36761798-36782820	zeta-chain (TCR) associated protein kinase	---	0	0	1	0	0	0	0	0	0	chr1	+	36778153	36778291	0	1
Zap70	e9.0	16954	17005	1.22117	0.612682	chr1:36761798-36782820	zeta-chain (TCR) associated protein kinase	---	0	0	1	0	0	0	0	0	0	chr1	+	36778751	36778802	0	1
Inpp4a	e1.0	1	281	-1.13685	0.318867	chr1:37299838-37410740	inositol polyphosphate-4-phosphatase, type I	---	0	0	1	0	0	0	0	0	0	chr1	+	37299838	37300118	0	0
Inpp4a	e2.0	57506	57567	-1.2866	0.399727	chr1:37299838-37410740	inositol polyphosphate-4-phosphatase, type I	---	0	0	1	0	0	0	0	0	0	chr1	+	37357343	37357404	0	0
Inpp4a	e3.0	57978	58187	-1.24913	0.162253	chr1:37299838-37410740	inositol polyphosphate-4-phosphatase, type I	---	0	0	1	0	0	0	0	0	0	chr1	+	37357815	37358024	0	0
Inpp4a	e4.0	58671	58715	-1.07031	0.616705	chr1:37299838-37410740	inositol polyphosphate-4-phosphatase, type I	---	0	0	1	0	0	0	0	0	0	chr1	+	37358508	37358552	0	0
Inpp4a	e5.0	64273	64391	1.08336	0.53065	chr1:37299838-37410740	inositol polyphosphate-4-phosphatase, type I	---	0	0	1	0	0	0	0	0	0	chr1	+	37364110	37364228	0	0
Inpp4a	e6.0	66326	66442	-1.24845	0.167187	chr1:37299838-37410740	inositol polyphosphate-4-phosphatase, type I	---	0	0	1	0	0	0	0	0	0	chr1	+	37366163	37366279	0	0
Inpp4a	e7.0	66702	66781	-1.04091	0.678064	chr1:37299838-37410740	inositol polyphosphate-4-phosphatase, type I	---	0	0	1	0	0	0	0	0	0	chr1	+	37366539	37366618	0	0
Inpp4a	e8.0	67033	67144	-1.1148	0.251289	chr1:37299838-37410740	inositol polyphosphate-4-phosphatase, type I	---	0	0	1	0	0	0	0	0	0	chr1	+	37366870	37366981	0	0
Inpp4a	e9.0	67920	68010	-1.01939	0.876778	chr1:37299838-37410740	inositol polyphosphate-4-phosphatase, type I	---	0	0	1	0	0	0	0	0	0	chr1	+	37367757	37367847	0	0
Inpp4a	e10.0	68440	68587	1.01321	0.906209	chr1:37299838-37410740	inositol polyphosphate-4-phosphatase, type I	---	0	0	1	0	0	0	0	0	0	chr1	+	37368277	37368424	0	0
Lipt1	e1.0	1	294	1.79837	0.287902	chr1:37871738-37877387	lipoyltransferase 1	ENSMUSG00000037216	0	0	1	0	0	0	0	0	0	chr1	+	37871738	37872031	0	0
Cnot11	e2.0	563	1346	-1.12135	0.762497	chr1:39534992-39546875	CCR4-NOT transcription complex, subunit 11	ENSMUSG00000003135	0	0	1	0	0	0	0	0	0	chr1	+	39535554	39536337	0	0
Cnot11	e3.0	2425	2589	-1.00236	0.977285	chr1:39534992-39546875	CCR4-NOT transcription complex, subunit 11	ENSMUSG00000003135	0	0	1	0	0	0	0	0	0	chr1	+	39537416	39537580	0	2
Map4k4	e1.0	1	374	1.12047	0.580073	chr1:39900913-40026310	mitogen-activated protein kinase kinase kinase kinase 4	---	0	0	1	0	0	0	0	0	0	chr1	+	39900913	39901286	0	0
Map4k4	e2.0	597	662	-1.29439	0.305727	chr1:39900913-40026310	mitogen-activated protein kinase kinase kinase kinase 4	---	0	0	1	0	0	0	0	0	0	chr1	+	39901509	39901574	0	1
Map4k4	e3.0	61266	61322	-1.23513	0.529985	chr1:39900913-40026310	mitogen-activated protein kinase kinase kinase kinase 4	---	1	0	1	0	0	0	0	0	0	chr1	+	39962178	39962234	0	1
Map4k4	e4.0	73015	73140	1.34278	0.10609	chr1:39900913-40026310	mitogen-activated protein kinase kinase kinase kinase 4	---	1	0	1	0	0	0	0	0	0	chr1	+	39973927	39974052	0	1
Map4k4	e5.0	75795	75905	-1.24644	0.313536	chr1:39900913-40026310	mitogen-activated protein kinase kinase kinase kinase 4	---	1	0	1	0	0	0	0	0	0	chr1	+	39976707	39976817	0	1
Map4k4	e6.0	79648	79738	-1.78235	0.207514	chr1:39900913-40026310	mitogen-activated protein kinase kinase kinase kinase 4	---	1	0	1	0	0	0	0	0	0	chr1	+	39980560	39980650	0	1
Map4k4	e7.0	82227	82357	-1.21068	0.323092	chr1:39900913-40026310	mitogen-activated protein kinase kinase kinase kinase 4	---	1	0	1	0	0	0	0	0	0	chr1	+	39983139	39983269	0	1
Map4k4	e8.0	82971	83025	-1.10497	0.694963	chr1:39900913-40026310	mitogen-activated protein kinase kinase kinase kinase 4	---	1	0	1	0	0	0	0	0	0	chr1	+	39983883	39983937	0	1
Map4k4	e9.0	84270	84348	-1.10779	0.50864	chr1:39900913-40026310	mitogen-activated protein kinase kinase kinase kinase 4	---	1	0	1	0	0	0	0	0	0	chr1	+	39985182	39985260	0	1
Map4k4	e10.0	85713	85888	-1.03346	0.794426	chr1:39900913-40026310	mitogen-activated protein kinase kinase kinase kinase 4	---	1	0	1	0	0	0	0	0	0	chr1	+	39986625	39986800	0	1
Map4k4	e11.0	88058	88130	-1.02858	0.735463	chr1:39900913-40026310	mitogen-activated protein kinase kinase kinase kinase 4	---	1	0	1	0	0	0	0	0	0	chr1	+	39988970	39989042	0	1
Map4k4	e12.0	89177	89387	-1.10935	0.261217	chr1:39900913-40026310	mitogen-activated protein kinase kinase kinase kinase 4	---	1	0	1	0	0	0	0	0	0	chr1	+	39990089	39990299	0	1
Map4k4	e13.0	96109	96270	-1.28553	0.0970259	chr1:39900913-40026310	mitogen-activated protein kinase kinase kinase kinase 4	---	1	0	1	0	0	0	0	0	0	chr1	+	39997021	39997182	0	1
Map4k4	e14.0	98976	99062	-1.1285	0.505549	chr1:39900913-40026310	mitogen-activated protein kinase kinase kinase kinase 4	---	1	0	1	0	0	0	0	0	0	chr1	+	39999888	39999974	0	1
Map4k4	e15.0	99712	99837	-1.40319	0.0456026	chr1:39900913-40026310	mitogen-activated protein kinase kinase kinase kinase 4	---	1	0	1	0	0	0	0	0	0	chr1	+	40000624	40000749	0	1
Map4k4	e16.0	100518	100679	-1.23971	0.0595331	chr1:39900913-40026310	mitogen-activated protein kinase kinase kinase kinase 4	---	1	0	1	0	0	1	0	0	1	chr1	+	40001430	40001591	0	0
Map4k4	e17.0	102845	103075	-1.35066	0.221279	chr1:39900913-40026310	mitogen-activated protein kinase kinase kinase kinase 4	---	1	0	1	0	0	1	0	0	1	chr1	+	40003757	40003987	0	0
Map4k4	e18.0	103895	104001	-1.02833	0.732087	chr1:39900913-40026310	mitogen-activated protein kinase kinase kinase kinase 4	---	1	0	1	0	0	0	0	0	0	chr1	+	40004807	40004913	0	1
Map4k4	e19.0	105759	105910	1.05862	0.241164	chr1:39900913-40026310	mitogen-activated protein kinase kinase kinase kinase 4	---	1	0	1	0	0	0	0	0	0	chr1	+	40006671	40006822	0	1
Slc9a4	e1.0	1	572	1.11286	0.305623	chr1:40580200-40630731	solute carrier family 9 (sodium/hydrogen exchanger), member 4	ENSMUSG00000026065	0	0	1	0	0	0	0	0	0	chr1	+	40580200	40580771	0	0
Slc9a4	e2.0	3660	4123	1.05677	0.58049	chr1:40580200-40630731	solute carrier family 9 (sodium/hydrogen exchanger), member 4	ENSMUSG00000026065	0	0	1	0	0	0	0	0	0	chr1	+	40583859	40584322	0	1
Slc9a4	e4.0	20571	20830	1.04533	0.520077	chr1:40580200-40630731	solute carrier family 9 (sodium/hydrogen exchanger), member 4	ENSMUSG00000026065	1	0	1	0	0	0	0	0	0	chr1	+	40600770	40601029	0	1
Slc9a4	e5.0	22654	22871	-1.08007	0.305913	chr1:40580200-40630731	solute carrier family 9 (sodium/hydrogen exchanger), member 4	ENSMUSG00000026065	1	0	1	0	0	0	0	0	0	chr1	+	40602853	40603070	0	2
Slc9a4	e6.0	26810	27012	1.05776	0.3893	chr1:40580200-40630731	solute carrier family 9 (sodium/hydrogen exchanger), member 4	ENSMUSG00000026065	1	0	1	0	0	0	0	0	0	chr1	+	40607009	40607211	0	2
Slc9a4	e7.0	27550	27636	1.06237	0.499336	chr1:40580200-40630731	solute carrier family 9 (sodium/hydrogen exchanger), member 4	ENSMUSG00000026065	1	0	1	0	0	0	0	0	0	chr1	+	40607749	40607835	0	2
Slc9a4	e8.0	30118	30188	1.06022	0.519676	chr1:40580200-40630731	solute carrier family 9 (sodium/hydrogen exchanger), member 4	ENSMUSG00000026065	1	0	1	0	0	0	0	0	0	chr1	+	40610317	40610387	0	1
Slc9a4	e9.0	31924	32085	1.15527	0.0873413	chr1:40580200-40630731	solute carrier family 9 (sodium/hydrogen exchanger), member 4	ENSMUSG00000026065	1	0	1	0	0	0	0	0	0	chr1	+	40612123	40612284	0	1
Slc9a4	e10.0	38841	38937	1.0987	0.293037	chr1:40580200-40630731	solute carrier family 9 (sodium/hydrogen exchanger), member 4	ENSMUSG00000026065	1	0	1	0	0	0	0	0	0	chr1	+	40619040	40619136	0	1
Slc9a4	e11.0	43194	43325	1.25566	0.0778316	chr1:40580200-40630731	solute carrier family 9 (sodium/hydrogen exchanger), member 4	ENSMUSG00000026065	1	0	1	0	0	0	0	0	0	chr1	+	40623393	40623524	0	1
Slc9a4	e12.0	44015	44102	1.18261	0.0985992	chr1:40580200-40630731	solute carrier family 9 (sodium/hydrogen exchanger), member 4	ENSMUSG00000026065	1	0	1	0	0	0	0	0	0	chr1	+	40624214	40624301	0	1
Pou3f3	e1.0	1	374	-1.10248	0.213153	chr1:42695768-42700210	POU domain, class 3, transcription factor 3	ENSMUSG00000045515	0	0	1	0	0	0	0	0	0	chr1	+	42695768	42696141	0	0
Pou3f3	e2.0	454	912	-1.0328	0.468362	chr1:42695768-42700210	POU domain, class 3, transcription factor 3	ENSMUSG00000045515	0	0	1	0	0	0	0	0	0	chr1	+	42696221	42696679	0	1
Pou3f3	e3.0	1073	1102	-1.04808	0.89837	chr1:42695768-42700210	POU domain, class 3, transcription factor 3	ENSMUSG00000045515	0	0	1	0	0	0	0	0	0	chr1	+	42696840	42696869	0	1
Mrps9	e1.0	1	194	-1.02126	0.870691	chr1:42851233-42905682	mitochondrial ribosomal protein S9	ENSMUSG00000060679	0	0	1	0	0	0	0	0	0	chr1	+	42851233	42851426	0	0
Mrps9	e2.0	11237	11416	1.06576	0.552541	chr1:42851233-42905682	mitochondrial ribosomal protein S9	ENSMUSG00000060679	0	0	1	0	0	0	0	0	0	chr1	+	42862469	42862648	0	1
Mrps9	e3.0	28523	28585	1.05231	0.61804	chr1:42851233-42905682	mitochondrial ribosomal protein S9	ENSMUSG00000060679	0	0	1	0	0	0	0	0	0	chr1	+	42879755	42879817	0	1
Mrps9	e4.0	28664	28694	1.06104	0.522588	chr1:42851233-42905682	mitochondrial ribosomal protein S9	ENSMUSG00000060679	0	0	1	0	0	0	0	0	0	chr1	+	42879896	42879926	0	1
Mrps9	e5.0	36475	36554	1.05409	0.409805	chr1:42851233-42905682	mitochondrial ribosomal protein S9	ENSMUSG00000060679	1	0	1	0	0	0	0	0	0	chr1	+	42887707	42887786	0	1
Mrps9	e6.0	44118	44185	-1.00332	0.951281	chr1:42851233-42905682	mitochondrial ribosomal protein S9	ENSMUSG00000060679	1	0	1	0	0	0	0	0	0	chr1	+	42895350	42895417	0	1
Mrps9	e7.0	44861	44936	-1.058	0.3052	chr1:42851233-42905682	mitochondrial ribosomal protein S9	ENSMUSG00000060679	1	0	1	0	0	0	0	0	0	chr1	+	42896093	42896168	0	2
Mrps9	e8.0	47208	47376	-1.05955	0.142085	chr1:42851233-42905682	mitochondrial ribosomal protein S9	ENSMUSG00000060679	1	0	1	0	0	0	0	0	0	chr1	+	42898440	42898608	0	1
Mrps9	e9.0	48209	48317	-1.01249	0.874553	chr1:42851233-42905682	mitochondrial ribosomal protein S9	ENSMUSG00000060679	1	0	1	0	0	0	0	0	0	chr1	+	42899441	42899549	0	1
Tpp2	e1.0	1	260	1.08903	0.726717	chr1:43933994-44002999	tripeptidyl peptidase II	---	0	0	1	0	0	0	0	0	0	chr1	+	43933994	43934253	0	0
Tpp2	e2.0	6117	6245	-1.27972	0.196965	chr1:43933994-44002999	tripeptidyl peptidase II	---	0	0	1	0	0	0	0	0	0	chr1	+	43940110	43940238	0	2
Tpp2	e3.0	15319	15414	1.00775	0.97214	chr1:43933994-44002999	tripeptidyl peptidase II	---	0	0	1	0	0	0	0	0	0	chr1	+	43949312	43949407	0	2
Tpp2	e4.0	17114	17218	1.17964	0.347374	chr1:43933994-44002999	tripeptidyl peptidase II	---	0	0	1	0	0	0	0	0	0	chr1	+	43951107	43951211	0	2
Tpp2	e5.0	19264	19388	1.07963	0.71359	chr1:43933994-44002999	tripeptidyl peptidase II	---	0	0	1	0	0	0	0	0	0	chr1	+	43953257	43953381	0	2
Tpp2	e6.0	20584	20747	-1.02947	0.783966	chr1:43933994-44002999	tripeptidyl peptidase II	---	0	0	1	0	0	0	0	0	0	chr1	+	43954577	43954740	0	2
Tpp2	e7.0	22478	22632	1.05	0.677406	chr1:43933994-44002999	tripeptidyl peptidase II	---	0	0	1	0	0	0	0	0	0	chr1	+	43956471	43956625	0	2
Tpp2	e8.0	23443	23519	1.06804	0.703843	chr1:43933994-44002999	tripeptidyl peptidase II	---	1	0	1	0	0	0	0	0	0	chr1	+	43957436	43957512	0	1
Tpp2	e9.0	26091	26218	-1.14041	0.354757	chr1:43933994-44002999	tripeptidyl peptidase II	---	1	0	1	0	0	0	0	0	0	chr1	+	43960084	43960211	0	1
Tpp2	e10.0	26875	26974	-1.17778	0.269316	chr1:43933994-44002999	tripeptidyl peptidase II	---	1	0	1	0	0	0	0	0	0	chr1	+	43960868	43960967	0	1
Tpp2	e11.0	34889	35037	1.04464	0.747808	chr1:43933994-44002999	tripeptidyl peptidase II	---	1	0	1	0	0	0	0	0	0	chr1	+	43968882	43969030	0	1
Tpp2	e12.0	36408	36523	-1.05522	0.771921	chr1:43933994-44002999	tripeptidyl peptidase II	---	1	0	1	0	0	0	0	0	0	chr1	+	43970401	43970516	0	1
Tpp2	e13.0	37571	37739	1.03779	0.839968	chr1:43933994-44002999	tripeptidyl peptidase II	---	1	0	1	0	0	0	0	0	0	chr1	+	43971564	43971732	0	1
Tpp2	e15.0	39451	39527	1.08615	0.726986	chr1:43933994-44002999	tripeptidyl peptidase II	---	1	0	1	0	0	0	0	0	0	chr1	+	43973444	43973520	0	1
Tpp2	e16.0	41423	41529	-1.18431	0.383987	chr1:43933994-44002999	tripeptidyl peptidase II	---	1	0	1	0	0	0	0	0	0	chr1	+	43975416	43975522	0	1
Tpp2	e17.0	43214	43368	-1.33702	0.197923	chr1:43933994-44002999	tripeptidyl peptidase II	---	1	0	1	0	0	0	0	0	0	chr1	+	43977207	43977361	0	1
Tpp2	e18.0	44420	44536	-1.05289	0.868862	chr1:43933994-44002999	tripeptidyl peptidase II	---	1	0	1	0	0	0	0	0	0	chr1	+	43978413	43978529	0	1
Tpp2	e19.0	44742	44842	-1.23386	0.448392	chr1:43933994-44002999	tripeptidyl peptidase II	---	1	0	1	0	0	0	0	0	0	chr1	+	43978735	43978835	0	1
Tpp2	e20.0	46315	46411	-1.10127	0.360755	chr1:43933994-44002999	tripeptidyl peptidase II	---	1	0	1	0	0	0	0	0	0	chr1	+	43980308	43980404	0	1
Tpp2	e21.0	47737	47874	1.14951	0.372141	chr1:43933994-44002999	tripeptidyl peptidase II	---	1	0	1	0	0	0	0	0	0	chr1	+	43981730	43981867	0	1
Tpp2	e22.0	49079	49323	-1.14659	0.567692	chr1:43933994-44002999	tripeptidyl peptidase II	---	1	0	1	0	0	0	0	0	0	chr1	+	43983072	43983316	0	1
Tpp2	e23.0	49521	49599	-1.15228	0.450945	chr1:43933994-44002999	tripeptidyl peptidase II	---	1	0	1	0	0	0	0	0	0	chr1	+	43983514	43983592	0	1
Tpp2	e25.0	56518	56669	1.04958	0.800074	chr1:43933994-44002999	tripeptidyl peptidase II	---	1	0	1	0	0	0	0	0	0	chr1	+	43990511	43990662	0	1
Tpp2	e26.0	57270	57366	-1.13086	0.639725	chr1:43933994-44002999	tripeptidyl peptidase II	---	1	0	1	0	0	0	0	0	0	chr1	+	43991263	43991359	0	1
Tpp2	e27.0	58271	58401	-1.11621	0.436503	chr1:43933994-44002999	tripeptidyl peptidase II	---	1	0	1	0	0	0	0	0	0	chr1	+	43992264	43992394	0	1
Tpp2	e28.0	65635	65842	1.09493	0.525735	chr1:43933994-44002999	tripeptidyl peptidase II	---	1	0	1	0	0	0	0	0	0	chr1	+	43999628	43999835	0	1
Bivm	e2.0	572	773	1.2473	0.377059	chr1:44118957-44144771	basic, immunoglobulin-like variable motif containing	---	0	0	1	0	0	0	0	0	0	chr1	+	44119528	44119729	0	0
Stat1	e3.0	3156	3286	1.15868	0.345502	chr1:52119436-52161865	signal transducer and activator of transcription 1	---	1	0	1	0	0	0	0	0	0	chr1	+	52122591	52122721	0	1
Stat1	e4.0	3679	3823	1.07476	0.737944	chr1:52119436-52161865	signal transducer and activator of transcription 1	---	1	0	1	0	0	0	0	0	0	chr1	+	52123114	52123258	0	1
Stat1	e5.0	7085	7183	-1.31852	0.0499726	chr1:52119436-52161865	signal transducer and activator of transcription 1	---	1	0	1	0	0	0	0	0	0	chr1	+	52126520	52126618	0	1
Stat1	e6.0	13109	13198	1.02815	0.788048	chr1:52119436-52161865	signal transducer and activator of transcription 1	---	1	0	1	0	0	0	0	0	0	chr1	+	52132544	52132633	0	1
Stat1	e7.0	16168	16246	1.17528	0.230536	chr1:52119436-52161865	signal transducer and activator of transcription 1	---	1	0	1	0	0	1	0	0	0	chr1	+	52135603	52135681	0	1
Stat1	e8.0	17444	17535	1.06449	0.641444	chr1:52119436-52161865	signal transducer and activator of transcription 1	---	1	0	1	0	0	0	0	0	0	chr1	+	52136879	52136970	0	1
Stat1	e9.0	17844	17995	-1.15342	0.351347	chr1:52119436-52161865	signal transducer and activator of transcription 1	---	1	0	1	0	0	0	0	0	0	chr1	+	52137279	52137430	0	1
Stat1	e10.0	19759	19917	-1.34706	0.0482964	chr1:52119436-52161865	signal transducer and activator of transcription 1	---	1	0	1	0	0	0	0	0	0	chr1	+	52139194	52139352	0	1
Stat1	e11.0	21142	21234	-1.4357	0.091182	chr1:52119436-52161865	signal transducer and activator of transcription 1	---	1	0	1	0	0	0	0	0	0	chr1	+	52140577	52140669	0	1
Stat1	e12.0	23466	23525	-1.49374	0.0892413	chr1:52119436-52161865	signal transducer and activator of transcription 1	---	1	0	1	0	0	0	0	0	0	chr1	+	52142901	52142960	0	1
Stat1	e13.0	24651	24680	-1.49739	0.0221532	chr1:52119436-52161865	signal transducer and activator of transcription 1	---	1	0	1	0	0	0	0	0	0	chr1	+	52144086	52144115	0	1
Stat1	e14.0	24769	24862	-1.21813	0.10499	chr1:52119436-52161865	signal transducer and activator of transcription 1	---	1	0	1	0	0	0	0	0	0	chr1	+	52144204	52144297	0	1
Stat1	e15.0	25715	25756	-1.25093	0.305638	chr1:52119436-52161865	signal transducer and activator of transcription 1	---	1	0	1	0	0	0	0	0	0	chr1	+	52145150	52145191	0	1
Stat1	e16.0	27859	27942	-1.39107	0.234771	chr1:52119436-52161865	signal transducer and activator of transcription 1	---	1	0	1	0	0	0	0	0	0	chr1	+	52147294	52147377	0	1
Stat1	e17.0	28466	28564	1.21746	0.113557	chr1:52119436-52161865	signal transducer and activator of transcription 1	---	1	0	1	0	0	0	0	0	0	chr1	+	52147901	52147999	0	1
Stat1	e18.0	29468	29603	1.09338	0.199228	chr1:52119436-52161865	signal transducer and activator of transcription 1	---	1	0	1	0	0	0	0	0	0	chr1	+	52148903	52149038	0	1
Stat1	e20.0	31184	31233	1.14369	0.40893	chr1:52119436-52161865	signal transducer and activator of transcription 1	---	1	0	1	0	0	0	0	0	0	chr1	+	52150619	52150668	0	1
Stat1	e21.0	31803	31897	-1.02434	0.861294	chr1:52119436-52161865	signal transducer and activator of transcription 1	---	1	0	1	0	0	0	0	0	0	chr1	+	52151238	52151332	0	1
Stat1	e22.0	32798	32943	1.16271	0.100268	chr1:52119436-52161865	signal transducer and activator of transcription 1	---	1	0	1	0	0	0	0	0	0	chr1	+	52152233	52152378	0	1
Nemp2	e4.0	10467	10539	-2.13241	0.0715839	chr1:52630705-52651919	nuclear envelope integral membrane protein 2	---	0	0	1	0	0	1	0	0	0	chr1	+	52641171	52641243	0	1
Nemp2	e6.0	11615	11708	-1.56562	0.364436	chr1:52630705-52651919	nuclear envelope integral membrane protein 2	---	0	0	1	0	0	1	0	0	0	chr1	+	52642319	52642412	0	2
Nemp2	e8.0	14557	14782	1.14756	0.503431	chr1:52630705-52651919	nuclear envelope integral membrane protein 2	---	0	0	1	0	0	1	0	0	0	chr1	+	52645261	52645486	0	2
Hibch	e1.0	1	218	-1.28995	0.083766	chr1:52844928-52920986	3-hydroxyisobutyryl-Coenzyme A hydrolase	ENSMUSG00000041426	0	0	1	0	0	0	0	0	0	chr1	+	52844928	52845145	0	0
Hibch	e3.0	8741	8783	-1.21243	0.111996	chr1:52844928-52920986	3-hydroxyisobutyryl-Coenzyme A hydrolase	ENSMUSG00000041426	1	0	1	1	0	0	0	0	0	chr1	+	52853668	52853710	0	0
Osgepl1	e1.0	1	235	-1.07878	0.648065	chr1:53313624-53326343	O-sialoglycoprotein endopeptidase-like 1	---	0	0	1	0	0	0	0	0	0	chr1	+	53313624	53313858	0	0
Osgepl1	e2.0	1233	1476	1.03137	0.774397	chr1:53313624-53326343	O-sialoglycoprotein endopeptidase-like 1	---	0	0	1	0	0	0	0	0	0	chr1	+	53314856	53315099	0	2
Coq10b	e1.0	1	222	1.03091	0.885727	chr1:55052769-55072701	coenzyme Q10B	---	0	0	1	0	0	0	0	0	0	chr1	+	55052769	55052990	0	0
Mob4	e1.0	1	115	-1.10569	0.435104	chr1:55131245-55154898	MOB family member 4, phocein	---	0	0	1	0	0	0	0	0	0	chr1	+	55131245	55131359	0	0
Mob4	e2.0	5433	5495	-1.10244	0.226017	chr1:55131245-55154898	MOB family member 4, phocein	---	0	0	1	0	0	1	0	0	0	chr1	+	55136677	55136739	0	2
Mob4	e3.0	13880	13980	-1.01426	0.550421	chr1:55131245-55154898	MOB family member 4, phocein	---	0	0	1	0	0	0	0	0	0	chr1	+	55145124	55145224	0	2
Spats2l	e1.0	1	71	1.51441	0.294857	chr1:57774417-57948397	spermatogenesis associated, serine-rich 2-like	---	0	0	1	0	0	0	0	0	0	chr1	+	57774417	57774487	0	0
Spats2l	e3.0	24889	24938	-1.10535	0.435747	chr1:57774417-57948397	spermatogenesis associated, serine-rich 2-like	---	0	0	1	0	0	0	0	0	0	chr1	+	57799305	57799354	0	2
Nif3l1	e1.0	1	484	-1.19203	0.188766	chr1:58445151-58493999	Ngg1 interacting factor 3-like 1 (S. pombe)	ENSMUSG00000026036	0	0	1	0	0	0	0	0	0	chr1	+	58445151	58445634	0	0
Nif3l1	e4.0	6939	7065	1.01526	0.760295	chr1:58445151-58493999	Ngg1 interacting factor 3-like 1 (S. pombe)	ENSMUSG00000026036	0	0	1	0	0	0	0	0	0	chr1	+	58452089	58452215	0	2
Cflar	e1.0	1	102	-1.09715	0.816317	chr1:58711491-58758884	CASP8 and FADD-like apoptosis regulator	---	0	0	1	0	0	0	0	0	0	chr1	+	58711491	58711592	0	0
Cdk15	e1.0	1	193	-1.40915	0.566479	chr1:59256906-59352448	cyclin-dependent kinase 15	ENSMUSG00000026023	0	0	1	0	0	0	0	0	0	chr1	+	59256906	59257098	0	0
Cdk15	e4.0	8699	8778	-1.19006	0.728283	chr1:59256906-59352448	cyclin-dependent kinase 15	ENSMUSG00000026023	0	0	1	0	0	0	0	0	0	chr1	+	59265604	59265683	0	2
Cdk15	e5.0	23664	23758	-1.29045	0.524494	chr1:59256906-59352448	cyclin-dependent kinase 15	ENSMUSG00000026023	0	0	1	0	0	0	0	0	0	chr1	+	59280569	59280663	0	2
Cdk15	e6.0	24504	24566	-1.06654	0.859618	chr1:59256906-59352448	cyclin-dependent kinase 15	ENSMUSG00000026023	0	0	1	0	0	0	0	0	0	chr1	+	59281409	59281471	0	2
Cdk15	e7.0	30857	30980	1.18135	0.624978	chr1:59256906-59352448	cyclin-dependent kinase 15	ENSMUSG00000026023	0	0	1	0	0	0	0	0	0	chr1	+	59287762	59287885	0	2
Cdk15	e8.0	32754	32874	1.60017	0.435106	chr1:59256906-59352448	cyclin-dependent kinase 15	ENSMUSG00000026023	0	0	1	0	0	0	0	0	0	chr1	+	59289659	59289779	0	2
Bmpr2	e1.0	1	1330	-1.03417	0.585048	chr1:59763399-59879014	bone morphogenetic protein receptor, type II (serine/threonine kinase)	ENSMUSG00000067336	0	0	1	0	0	0	0	0	0	chr1	+	59763399	59764728	0	0
Bmpr2	e2.0	50190	50360	-1.0785	0.397635	chr1:59763399-59879014	bone morphogenetic protein receptor, type II (serine/threonine kinase)	ENSMUSG00000067336	0	0	1	0	0	0	0	0	0	chr1	+	59813588	59813758	0	1
Bmpr2	e3.0	51843	52013	-1.02556	0.763637	chr1:59763399-59879014	bone morphogenetic protein receptor, type II (serine/threonine kinase)	ENSMUSG00000067336	0	0	1	0	0	0	0	0	0	chr1	+	59815241	59815411	0	1
Bmpr2	e4.0	78033	78143	1.01444	0.937562	chr1:59763399-59879014	bone morphogenetic protein receptor, type II (serine/threonine kinase)	ENSMUSG00000067336	0	0	1	0	0	0	0	0	0	chr1	+	59841431	59841541	0	1
Bmpr2	e5.0	79345	79436	-1.04003	0.844045	chr1:59763399-59879014	bone morphogenetic protein receptor, type II (serine/threonine kinase)	ENSMUSG00000067336	0	0	1	0	0	0	0	0	0	chr1	+	59842743	59842834	0	1
Bmpr2	e6.0	82080	82310	-1.10396	0.439562	chr1:59763399-59879014	bone morphogenetic protein receptor, type II (serine/threonine kinase)	ENSMUSG00000067336	0	0	1	0	0	0	0	0	0	chr1	+	59845478	59845708	0	1
Bmpr2	e7.0	83660	83774	-1.17834	0.0409378	chr1:59763399-59879014	bone morphogenetic protein receptor, type II (serine/threonine kinase)	ENSMUSG00000067336	0	0	1	0	0	0	0	0	0	chr1	+	59847058	59847172	0	1
Bmpr2	e8.0	87780	87940	1.03113	0.726927	chr1:59763399-59879014	bone morphogenetic protein receptor, type II (serine/threonine kinase)	ENSMUSG00000067336	0	0	1	0	0	0	0	0	0	chr1	+	59851178	59851338	0	1
Carf	e2.0	49605	49666	-1.42832	0.129339	chr1:60048642-60153952	calcium response factor	---	0	0	1	0	0	0	0	0	0	chr1	+	60098246	60098307	0	0
Carf	e5.0	56670	56786	-1.03977	0.826504	chr1:60048642-60153952	calcium response factor	---	0	0	1	0	0	0	0	0	0	chr1	+	60105311	60105427	0	0
Carf	e6.0	59442	59559	1.5605	0.00249891	chr1:60048642-60153952	calcium response factor	---	1	0	1	0	0	0	0	0	0	chr1	+	60108083	60108200	0	1
Carf	e7.0	60686	60808	1.41629	0.0598775	chr1:60048642-60153952	calcium response factor	---	1	0	1	0	0	0	0	0	0	chr1	+	60109327	60109449	0	1
Carf	e10.0	77279	77393	-1.26782	0.339143	chr1:60048642-60153952	calcium response factor	---	1	0	1	0	0	0	0	0	0	chr1	+	60125920	60126034	0	1
Carf	e11.0	79348	79432	-1.20287	0.243967	chr1:60048642-60153952	calcium response factor	---	1	0	1	0	0	0	0	0	0	chr1	+	60127989	60128073	0	1
Carf	e12.0	83203	83392	-1.18952	0.26317	chr1:60048642-60153952	calcium response factor	---	1	0	1	0	0	0	0	0	0	chr1	+	60131844	60132033	0	1
Carf	e13.0	87623	87743	1.0663	0.754108	chr1:60048642-60153952	calcium response factor	---	1	0	1	0	0	1	0	0	0	chr1	+	60136264	60136384	0	1
Carf	e14.0	90559	90702	-1.34973	0.0072922	chr1:60048642-60153952	calcium response factor	---	1	0	1	0	0	1	0	0	0	chr1	+	60139200	60139343	0	1
Abi2	e1.0	1	301	1.03314	0.783429	chr1:60409619-60481162	abl interactor 2	---	0	0	1	0	0	0	0	0	0	chr1	+	60409619	60409919	0	0
Abi2	e2.0	24625	24792	1.10404	0.250672	chr1:60409619-60481162	abl interactor 2	---	0	0	1	0	0	0	0	0	0	chr1	+	60434243	60434410	0	0
Abi2	e3.0	27438	27614	-1.02974	0.739296	chr1:60409619-60481162	abl interactor 2	---	0	0	1	0	0	0	0	0	0	chr1	+	60437056	60437232	0	0
Abi2	e4.0	29324	29341	-1.02074	0.814324	chr1:60409619-60481162	abl interactor 2	---	0	0	1	1	0	1	0	0	0	chr1	+	60438942	60438959	1	0
Abi2	e5.0	34367	34464	-1.04839	0.40226	chr1:60409619-60481162	abl interactor 2	---	0	0	1	0	0	0	0	0	0	chr1	+	60443985	60444082	0	0
Abi2	e6.0	37642	37788	1.08717	0.629356	chr1:60409619-60481162	abl interactor 2	---	1	0	1	0	0	0	0	0	0	chr1	+	60447260	60447406	0	0
Abi2	e7.0	38460	38584	1.00756	0.907273	chr1:60409619-60481162	abl interactor 2	---	1	0	1	0	0	0	0	0	0	chr1	+	60448078	60448202	0	0
Abi2	e8.0	40552	40635	-1.01105	0.927828	chr1:60409619-60481162	abl interactor 2	---	1	0	1	0	0	1	0	0	0	chr1	+	60450170	60450253	0	0
Abi2	e9.0	43986	44144	-1.08011	0.378547	chr1:60409619-60481162	abl interactor 2	---	1	0	1	0	0	0	0	0	0	chr1	+	60453604	60453762	0	0
Abi2	e10.0	61048	61221	-1.07503	0.239561	chr1:60409619-60481162	abl interactor 2	---	1	0	1	0	0	0	0	0	0	chr1	+	60470666	60470839	0	0
Nrp2	e1.0	1	961	1.19108	0.241749	chr1:62703317-62818692	neuropilin 2	---	0	0	1	0	0	0	0	0	0	chr1	+	62703317	62704277	0	0
Nrp2	e2.0	15614	15791	1.45167	0.193527	chr1:62703317-62818692	neuropilin 2	---	0	0	1	0	0	0	0	0	0	chr1	+	62718930	62719107	0	2
Nrp2	e3.0	34973	35154	1.33631	0.0911195	chr1:62703317-62818692	neuropilin 2	---	0	0	1	0	0	0	0	0	0	chr1	+	62738289	62738470	0	2
Nrp2	e4.0	40859	41089	1.0511	0.863522	chr1:62703317-62818692	neuropilin 2	---	1	0	1	0	0	0	0	0	0	chr1	+	62744175	62744405	0	1
Nrp2	e5.0	42042	42197	-1.1376	0.351149	chr1:62703317-62818692	neuropilin 2	---	1	0	1	0	0	0	0	0	0	chr1	+	62745358	62745513	0	1
Nrp2	e8.0	57459	57603	1.28053	0.162699	chr1:62703317-62818692	neuropilin 2	---	1	0	1	0	0	0	0	0	0	chr1	+	62760775	62760919	0	1
Nrp2	e9.0	59375	59724	1.17056	0.0887298	chr1:62703317-62818692	neuropilin 2	---	1	0	1	0	0	0	0	0	0	chr1	+	62762691	62763040	0	1
Nrp2	e10.0	61534	61678	-1.01224	0.931335	chr1:62703317-62818692	neuropilin 2	---	1	0	1	0	0	0	0	0	0	chr1	+	62764850	62764994	0	2
Adam23	e1.0	1	524	-1.12741	0.673199	chr1:63445889-63596276	a disintegrin and metallopeptidase domain 23	---	0	0	1	0	0	0	0	0	0	chr1	+	63445889	63446412	0	0
Adam23	e2.0	1840	2060	1.06455	0.48814	chr1:63445889-63596276	a disintegrin and metallopeptidase domain 23	---	0	0	1	0	0	0	0	0	0	chr1	+	63447728	63447948	0	0
Adam23	e3.0	31791	31867	1.07617	0.372245	chr1:63445889-63596276	a disintegrin and metallopeptidase domain 23	---	0	0	1	0	0	0	0	0	0	chr1	+	63477679	63477755	0	0
Fastkd2	e1.0	1	68	-1.22636	0.318027	chr1:63730624-63754655	FAST kinase domains 2	---	0	0	1	0	0	0	0	0	0	chr1	+	63730624	63730691	0	0
Creb1	e1.0	1	217	-1.0183	0.935809	chr1:64532804-64604547	cAMP responsive element binding protein 1	---	0	0	1	0	0	0	0	0	0	chr1	+	64532804	64533020	0	0
Creb1	e2.0	18046	18167	-1.13505	0.166682	chr1:64532804-64604547	cAMP responsive element binding protein 1	---	0	0	1	0	0	1	0	0	0	chr1	+	64550849	64550970	0	0
Creb1	e3.0	25700	25846	-1.01351	0.878324	chr1:64532804-64604547	cAMP responsive element binding protein 1	---	0	0	1	0	0	0	0	0	0	chr1	+	64558503	64558649	0	1
Creb1	e6.0	37331	37473	-1.08324	0.232462	chr1:64532804-64604547	cAMP responsive element binding protein 1	---	0	0	1	0	0	0	0	0	0	chr1	+	64570134	64570276	0	1
Creb1	e7.0	41270	41452	1.05215	0.49839	chr1:64532804-64604547	cAMP responsive element binding protein 1	---	1	0	1	0	0	1	0	0	0	chr1	+	64574073	64574255	0	1
Creb1	e9.0	43376	43526	1.05684	0.465755	chr1:64532804-64604547	cAMP responsive element binding protein 1	---	1	0	1	0	0	0	0	0	0	chr1	+	64576179	64576329	0	1
Map2	e1.0	1	183	1.41502	0.211403	chr1:66175313-66442581	microtubule-associated protein 2	---	0	0	1	0	0	0	0	0	0	chr1	+	66175313	66175495	0	0
Map2	e2.0	17807	17869	1.26583	0.523677	chr1:66175313-66442581	microtubule-associated protein 2	---	0	0	1	0	0	0	0	0	0	chr1	+	66193119	66193181	0	0
Map2	e3.0	146412	146830	1.08486	0.602732	chr1:66175313-66442581	microtubule-associated protein 2	---	0	0	1	0	0	0	0	0	0	chr1	+	66321724	66322142	0	0
Map2	e4.0	147092	147156	1.07433	0.675792	chr1:66175313-66442581	microtubule-associated protein 2	---	0	0	1	0	0	0	0	0	0	chr1	+	66322404	66322468	0	0
Map2	e5.0	186891	186968	1.24397	0.050739	chr1:66175313-66442581	microtubule-associated protein 2	---	1	0	1	0	0	0	0	0	0	chr1	+	66362203	66362280	0	1
Map2	e7.0	205177	205461	1.08864	0.278084	chr1:66175313-66442581	microtubule-associated protein 2	---	1	0	1	0	0	0	0	0	0	chr1	+	66380489	66380773	0	1
Unc80	e1.0	1	605	1.37696	0.117576	chr1:66467934-66699150	unc-80, NALCN activator	ENSMUSG00000055567	0	0	1	0	0	0	0	0	0	chr1	+	66467934	66468538	0	0
Unc80	e2.0	1531	1579	1.22396	0.176598	chr1:66467934-66699150	unc-80, NALCN activator	ENSMUSG00000055567	0	0	1	0	0	0	0	0	0	chr1	+	66469464	66469512	0	1
Unc80	e3.0	4043	4199	1.05071	0.639258	chr1:66467934-66699150	unc-80, NALCN activator	ENSMUSG00000055567	0	0	1	0	0	0	0	0	0	chr1	+	66471976	66472132	0	1
Unc80	e4.0	5298	5599	1.08144	0.373457	chr1:66467934-66699150	unc-80, NALCN activator	ENSMUSG00000055567	0	0	1	0	0	0	0	0	0	chr1	+	66473231	66473532	0	1
Unc80	e5.0	15308	15431	1.2233	0.044754	chr1:66467934-66699150	unc-80, NALCN activator	ENSMUSG00000055567	0	0	1	0	0	0	0	0	0	chr1	+	66483241	66483364	0	1
Unc80	e6.0	17832	17908	1.13952	0.145374	chr1:66467934-66699150	unc-80, NALCN activator	ENSMUSG00000055567	0	0	1	0	0	0	0	0	0	chr1	+	66485765	66485841	0	1
Unc80	e7.0	23059	23198	-1.09346	0.461989	chr1:66467934-66699150	unc-80, NALCN activator	ENSMUSG00000055567	1	0	1	0	0	1	0	0	0	chr1	+	66490992	66491131	0	1
Unc80	e8.0	35597	35858	-1.50201	0.0162291	chr1:66467934-66699150	unc-80, NALCN activator	ENSMUSG00000055567	1	0	1	0	0	0	0	0	0	chr1	+	66503530	66503791	0	1
Unc80	e9.0	36990	37124	1.04932	0.779704	chr1:66467934-66699150	unc-80, NALCN activator	ENSMUSG00000055567	1	0	1	0	0	0	0	0	0	chr1	+	66504923	66505057	0	0
Unc80	e10.0	38697	38913	-1.13265	0.417818	chr1:66467934-66699150	unc-80, NALCN activator	ENSMUSG00000055567	1	0	1	0	0	0	0	0	0	chr1	+	66506630	66506846	0	0
Unc80	e11.0	39393	39533	1.04828	0.769566	chr1:66467934-66699150	unc-80, NALCN activator	ENSMUSG00000055567	1	0	1	0	0	0	0	0	0	chr1	+	66507326	66507466	0	0
Unc80	e12.0	41334	41602	-1.18882	0.376607	chr1:66467934-66699150	unc-80, NALCN activator	ENSMUSG00000055567	1	0	1	0	0	0	0	0	0	chr1	+	66509267	66509535	0	0
Unc80	e13.0	42617	42991	-1.16863	0.151932	chr1:66467934-66699150	unc-80, NALCN activator	ENSMUSG00000055567	1	0	1	0	0	0	0	0	0	chr1	+	66510550	66510924	0	0
Unc80	e14.0	53522	53668	1.08128	0.71246	chr1:66467934-66699150	unc-80, NALCN activator	ENSMUSG00000055567	1	0	1	0	0	0	0	0	0	chr1	+	66521455	66521601	0	0
Unc80	e15.0	57710	57857	-1.05066	0.705564	chr1:66467934-66699150	unc-80, NALCN activator	ENSMUSG00000055567	1	0	1	0	0	0	0	0	0	chr1	+	66525643	66525790	0	0
Unc80	e16.0	59939	60087	-1.33222	0.132334	chr1:66467934-66699150	unc-80, NALCN activator	ENSMUSG00000055567	1	0	1	0	0	0	0	0	0	chr1	+	66527872	66528020	0	0
Unc80	e17.0	62039	62205	-1.11602	0.492065	chr1:66467934-66699150	unc-80, NALCN activator	ENSMUSG00000055567	1	0	1	0	0	0	0	0	0	chr1	+	66529972	66530138	0	0
Unc80	e18.0	62822	62920	-1.1253	0.377757	chr1:66467934-66699150	unc-80, NALCN activator	ENSMUSG00000055567	1	0	1	0	0	0	0	0	0	chr1	+	66530755	66530853	0	0
Unc80	e19.0	81795	82003	-1.31698	0.019226	chr1:66467934-66699150	unc-80, NALCN activator	ENSMUSG00000055567	1	0	1	0	0	0	0	0	0	chr1	+	66549728	66549936	0	0
Unc80	e20.0	83013	83119	-1.35435	0.179343	chr1:66467934-66699150	unc-80, NALCN activator	ENSMUSG00000055567	1	0	1	0	0	0	0	0	0	chr1	+	66550946	66551052	0	0
Unc80	e21.0	84221	84317	-1.66434	0.134129	chr1:66467934-66699150	unc-80, NALCN activator	ENSMUSG00000055567	1	0	1	0	0	0	0	0	0	chr1	+	66552154	66552250	0	0
Unc80	e22.0	86994	87166	-1.29904	0.185281	chr1:66467934-66699150	unc-80, NALCN activator	ENSMUSG00000055567	1	0	1	0	0	0	0	0	0	chr1	+	66554927	66555099	0	0
Unc80	e23.0	101857	102069	-1.22393	0.295885	chr1:66467934-66699150	unc-80, NALCN activator	ENSMUSG00000055567	1	0	1	0	0	0	0	0	0	chr1	+	66569790	66570002	0	0
Unc80	e24.0	122262	122397	-1.57372	0.0992563	chr1:66467934-66699150	unc-80, NALCN activator	ENSMUSG00000055567	1	0	1	0	0	0	0	0	0	chr1	+	66590195	66590330	0	0
Unc80	e25.0	125732	125865	-1.09204	0.50915	chr1:66467934-66699150	unc-80, NALCN activator	ENSMUSG00000055567	1	0	1	0	0	0	0	0	0	chr1	+	66593665	66593798	0	0
Unc80	e26.0	133122	133287	-1.12431	0.54483	chr1:66467934-66699150	unc-80, NALCN activator	ENSMUSG00000055567	1	0	1	0	0	0	0	0	0	chr1	+	66601055	66601220	0	0
Unc80	e27.0	138519	138722	-2.55024	0.128771	chr1:66467934-66699150	unc-80, NALCN activator	ENSMUSG00000055567	1	0	1	0	0	1	0	0	0	chr1	+	66606452	66606655	0	0
Unc80	e28.0	140459	140559	-1.23605	0.347169	chr1:66467934-66699150	unc-80, NALCN activator	ENSMUSG00000055567	1	0	1	0	0	0	0	0	0	chr1	+	66608392	66608492	0	0
Unc80	e29.0	144155	144355	-1.23149	0.411751	chr1:66467934-66699150	unc-80, NALCN activator	ENSMUSG00000055567	1	0	1	0	0	0	0	0	0	chr1	+	66612088	66612288	0	0
Unc80	e30.0	150229	150336	-1.41845	0.0186697	chr1:66467934-66699150	unc-80, NALCN activator	ENSMUSG00000055567	1	0	1	0	0	0	0	0	0	chr1	+	66618162	66618269	0	0
Unc80	e31.0	151492	151630	-1.70186	0.0198804	chr1:66467934-66699150	unc-80, NALCN activator	ENSMUSG00000055567	1	0	1	0	0	0	0	0	0	chr1	+	66619425	66619563	0	0
Unc80	e32.0	154523	154704	-1.39117	0.0362105	chr1:66467934-66699150	unc-80, NALCN activator	ENSMUSG00000055567	1	0	1	0	0	0	0	0	0	chr1	+	66622456	66622637	0	0
Unc80	e33.0	155277	155408	-1.44583	0.0186543	chr1:66467934-66699150	unc-80, NALCN activator	ENSMUSG00000055567	1	0	1	0	0	0	0	0	0	chr1	+	66623210	66623341	0	0
Unc80	e34.0	158495	158681	-1.29246	0.201138	chr1:66467934-66699150	unc-80, NALCN activator	ENSMUSG00000055567	1	0	1	0	0	0	0	0	0	chr1	+	66626428	66626614	0	0
Unc80	e35.0	159261	159389	-1.63067	0.0361952	chr1:66467934-66699150	unc-80, NALCN activator	ENSMUSG00000055567	1	0	1	0	0	0	0	0	0	chr1	+	66627194	66627322	0	0
Unc80	e36.0	163455	163598	-1.46438	0.164962	chr1:66467934-66699150	unc-80, NALCN activator	ENSMUSG00000055567	1	0	1	0	0	0	0	0	0	chr1	+	66631388	66631531	0	0
Unc80	e37.0	167924	168024	-1.40154	0.00648838	chr1:66467934-66699150	unc-80, NALCN activator	ENSMUSG00000055567	1	0	1	0	0	0	0	0	0	chr1	+	66635857	66635957	0	0
Unc80	e38.0	168995	169081	-1.38186	0.0440811	chr1:66467934-66699150	unc-80, NALCN activator	ENSMUSG00000055567	1	0	1	0	0	0	0	0	0	chr1	+	66636928	66637014	0	0
Unc80	e39.0	169981	170164	-1.19359	0.2934	chr1:66467934-66699150	unc-80, NALCN activator	ENSMUSG00000055567	1	0	1	0	0	0	0	0	0	chr1	+	66637914	66638097	0	0
Unc80	e40.0	171313	171407	-1.61449	0.0731058	chr1:66467934-66699150	unc-80, NALCN activator	ENSMUSG00000055567	1	0	1	0	0	0	0	0	0	chr1	+	66639246	66639340	0	0
Unc80	e41.0	172618	172707	-1.60095	0.0831968	chr1:66467934-66699150	unc-80, NALCN activator	ENSMUSG00000055567	1	0	1	0	0	0	0	0	0	chr1	+	66640551	66640640	0	0
Unc80	e42.0	173683	173784	-1.28263	0.353534	chr1:66467934-66699150	unc-80, NALCN activator	ENSMUSG00000055567	1	0	1	0	0	0	0	0	0	chr1	+	66641616	66641717	0	0
Unc80	e43.0	176339	176519	-1.25848	0.0639278	chr1:66467934-66699150	unc-80, NALCN activator	ENSMUSG00000055567	1	0	1	0	0	0	0	0	0	chr1	+	66644272	66644452	0	0
Unc80	e44.0	178438	178706	-1.37103	0.099742	chr1:66467934-66699150	unc-80, NALCN activator	ENSMUSG00000055567	1	0	1	0	0	0	0	0	0	chr1	+	66646371	66646639	0	0
Unc80	e45.0	180448	180582	-1.11002	0.635781	chr1:66467934-66699150	unc-80, NALCN activator	ENSMUSG00000055567	1	0	1	0	0	0	0	0	0	chr1	+	66648381	66648515	0	0
Unc80	e46.0	180968	181106	-1.46175	0.174999	chr1:66467934-66699150	unc-80, NALCN activator	ENSMUSG00000055567	1	0	1	0	0	0	0	0	0	chr1	+	66648901	66649039	0	0
Unc80	e47.0	181741	181837	-1.22916	0.292756	chr1:66467934-66699150	unc-80, NALCN activator	ENSMUSG00000055567	1	0	1	0	0	0	0	0	0	chr1	+	66649674	66649770	0	0
Unc80	e48.0	183527	183697	-1.32005	0.355312	chr1:66467934-66699150	unc-80, NALCN activator	ENSMUSG00000055567	1	0	1	0	0	0	0	0	0	chr1	+	66651460	66651630	0	0
Unc80	e49.0	185363	185455	-1.43044	0.0679435	chr1:66467934-66699150	unc-80, NALCN activator	ENSMUSG00000055567	1	0	1	0	0	0	0	0	0	chr1	+	66653296	66653388	0	0
Unc80	e50.0	186077	186112	-1.46068	0.00649194	chr1:66467934-66699150	unc-80, NALCN activator	ENSMUSG00000055567	1	0	1	0	0	0	0	0	0	chr1	+	66654010	66654045	0	0
Unc80	e51.0	186451	186669	-1.42071	0.000183759	chr1:66467934-66699150	unc-80, NALCN activator	ENSMUSG00000055567	1	0	1	0	0	0	0	0	0	chr1	+	66654384	66654602	0	0
Unc80	e52.0	201163	201363	-1.40455	0.085263	chr1:66467934-66699150	unc-80, NALCN activator	ENSMUSG00000055567	1	0	1	0	0	0	0	0	0	chr1	+	66669096	66669296	0	0
Unc80	e53.0	203653	203776	-1.51709	0.0486453	chr1:66467934-66699150	unc-80, NALCN activator	ENSMUSG00000055567	1	0	1	0	0	0	0	0	0	chr1	+	66671586	66671709	0	0
Unc80	e54.0	204724	204849	-1.29048	0.276317	chr1:66467934-66699150	unc-80, NALCN activator	ENSMUSG00000055567	1	0	1	0	0	0	0	0	0	chr1	+	66672657	66672782	0	0
Tmem169	e1.0	1	100	-1.13382	0.190741	chr1:72284367-72303103	transmembrane protein 169	ENSMUSG00000026188	0	0	1	0	0	0	0	0	0	chr1	+	72284367	72284466	0	0
Smarcal1	e1.0	1	109	1.33692	0.566457	chr1:72537045-72636790	SWI/SNF related matrix associated, actin dependent regulator of chromatin, subfamily a-like 1	---	0	0	1	0	0	0	0	0	0	chr1	+	72537045	72537153	0	0
Smarcal1	e2.0	46207	46394	-1.03842	0.790234	chr1:72537045-72636790	SWI/SNF related matrix associated, actin dependent regulator of chromatin, subfamily a-like 1	---	0	0	1	0	0	0	0	0	0	chr1	+	72583251	72583438	0	0
Smarcal1	e3.0	46571	46693	-1.51341	0.259528	chr1:72537045-72636790	SWI/SNF related matrix associated, actin dependent regulator of chromatin, subfamily a-like 1	---	0	0	1	0	0	0	0	0	0	chr1	+	72583615	72583737	0	0
Igfbp2	e1.0	1	485	-1.05068	0.498362	chr1:72824480-72852469	insulin-like growth factor binding protein 2	---	0	0	1	0	0	0	0	0	0	chr1	+	72824480	72824964	0	0
Igfbp2	e2.0	908	995	1.16235	0.197138	chr1:72824480-72852469	insulin-like growth factor binding protein 2	---	0	0	1	0	0	0	0	0	0	chr1	+	72825387	72825474	0	0
Arpc2	e1.0	1	94	-1.26041	0.496734	chr1:74236517-74268208	actin related protein 2/3 complex, subunit 2	---	0	0	1	0	0	0	0	0	0	chr1	+	74236517	74236610	0	0
Arpc2	e2.0	302	383	-1.07001	0.692577	chr1:74236517-74268208	actin related protein 2/3 complex, subunit 2	---	0	0	1	0	0	0	0	0	0	chr1	+	74236818	74236899	0	1
Arpc2	e3.0	9564	9598	1.07409	0.397192	chr1:74236517-74268208	actin related protein 2/3 complex, subunit 2	---	0	0	1	0	0	0	0	0	0	chr1	+	74246080	74246114	0	1
Arpc2	e4.0	11616	11728	-1.06277	0.446377	chr1:74236517-74268208	actin related protein 2/3 complex, subunit 2	---	0	0	1	0	0	0	0	0	0	chr1	+	74248132	74248244	0	1
Arpc2	e5.0	14738	14783	-1.02064	0.753733	chr1:74236517-74268208	actin related protein 2/3 complex, subunit 2	---	0	0	1	0	0	0	0	0	0	chr1	+	74251254	74251299	0	1
Pnkd	e1.0	1	208	1.0669	0.653528	chr1:74284930-74353692	paroxysmal nonkinesiogenic dyskinesia	---	0	0	1	0	0	0	0	0	0	chr1	+	74284930	74285137	0	0
Pnkd	e2.0	913	1081	1.09712	0.297484	chr1:74284930-74353692	paroxysmal nonkinesiogenic dyskinesia	---	0	0	1	0	0	0	0	0	0	chr1	+	74285842	74286010	0	1
Pnkd	e4.0	47679	47862	-1.14302	0.436786	chr1:74284930-74353692	paroxysmal nonkinesiogenic dyskinesia	---	0	0	1	0	0	0	0	0	0	chr1	+	74332608	74332791	0	0
Cnot9	e1.0	1	404	-1.31611	0.193739	chr1:74506058-74530842	CCR4-NOT transcription complex, subunit 9	ENSMUSG00000026174	0	0	1	0	0	0	0	0	0	chr1	+	74506058	74506461	0	0
Cnot9	e2.0	11013	11192	1.00778	0.902952	chr1:74506058-74530842	CCR4-NOT transcription complex, subunit 9	ENSMUSG00000026174	0	0	1	0	0	0	0	0	0	chr1	+	74517070	74517249	0	1
Cnot9	e3.0	12844	12959	1.08751	0.299047	chr1:74506058-74530842	CCR4-NOT transcription complex, subunit 9	ENSMUSG00000026174	0	0	1	0	0	0	0	0	0	chr1	+	74518901	74519016	0	1
Cnot9	e4.0	16261	16370	-1.12367	0.140483	chr1:74506058-74530842	CCR4-NOT transcription complex, subunit 9	ENSMUSG00000026174	0	0	1	0	0	0	0	0	0	chr1	+	74522318	74522427	0	1
Cnot9	e5.0	17447	17556	-1.00164	0.983567	chr1:74506058-74530842	CCR4-NOT transcription complex, subunit 9	ENSMUSG00000026174	0	0	1	0	0	0	0	0	0	chr1	+	74523504	74523613	0	1
Cnot9	e6.0	20935	21033	1.01434	0.76905	chr1:74506058-74530842	CCR4-NOT transcription complex, subunit 9	ENSMUSG00000026174	0	0	1	0	0	0	0	0	0	chr1	+	74526992	74527090	0	1
Cnot9	e7.0	21535	21626	-1.0318	0.776366	chr1:74506058-74530842	CCR4-NOT transcription complex, subunit 9	ENSMUSG00000026174	0	0	1	0	0	0	0	0	0	chr1	+	74527592	74527683	0	1
Zfand2b	e1.0	1	62	-1.26299	0.526701	chr1:75168646-75171626	zinc finger, AN1 type domain 2B	---	0	0	1	0	0	0	0	0	0	chr1	+	75168646	75168707	0	0
Speg	e2.0	6818	6878	1.18157	0.617267	chr1:75375297-75432270	SPEG complex locus	---	0	0	1	0	0	0	0	0	0	chr1	+	75382114	75382174	0	0
Speg	e3.0	7841	7883	-1.22379	0.61082	chr1:75375297-75432270	SPEG complex locus	---	0	0	1	0	0	0	0	0	0	chr1	+	75383137	75383179	0	0
Speg	e4.0	9360	9449	1.07717	0.84793	chr1:75375297-75432270	SPEG complex locus	---	0	0	1	0	0	0	0	0	0	chr1	+	75384656	75384745	0	0
Speg	e6.0	10311	10380	-1.26703	0.640149	chr1:75375297-75432270	SPEG complex locus	---	0	0	1	0	0	0	0	0	0	chr1	+	75385607	75385676	0	0
Speg	e8.0	15683	15826	-1.37954	0.452522	chr1:75375297-75432270	SPEG complex locus	---	0	0	1	0	0	0	0	0	0	chr1	+	75390979	75391122	0	0
Speg	e9.0	16466	16648	1.24994	0.219643	chr1:75375297-75432270	SPEG complex locus	---	0	0	1	0	0	0	0	0	0	chr1	+	75391762	75391944	0	0
Inha	e1.0	1	442	-1.05985	0.589001	chr1:75507077-75510366	inhibin alpha	ENSMUSG00000032968	0	0	1	0	0	0	0	0	0	chr1	+	75507077	75507518	0	0
Stk11ip	e1.0	1	114	1.4469	0.288328	chr1:75521529-75537334	serine/threonine kinase 11 interacting protein	---	0	0	1	0	0	0	0	0	0	chr1	+	75521529	75521642	0	0
Stk11ip	e2.0	236	321	-1.18233	0.0715176	chr1:75521529-75537334	serine/threonine kinase 11 interacting protein	---	0	0	1	0	0	0	0	0	0	chr1	+	75521764	75521849	0	0
Stk11ip	e3.0	3155	3360	-1.05074	0.535912	chr1:75521529-75537334	serine/threonine kinase 11 interacting protein	---	0	0	1	0	0	0	0	0	0	chr1	+	75524683	75524888	0	0
Stk11ip	e4.0	3560	3634	-1.03552	0.761685	chr1:75521529-75537334	serine/threonine kinase 11 interacting protein	---	0	0	1	0	0	0	0	0	0	chr1	+	75525088	75525162	0	0
Stk11ip	e5.0	3891	3986	1.04508	0.822382	chr1:75521529-75537334	serine/threonine kinase 11 interacting protein	---	0	0	1	0	0	0	0	0	0	chr1	+	75525419	75525514	0	0
Stk11ip	e6.0	4324	4431	-1.00948	0.958964	chr1:75521529-75537334	serine/threonine kinase 11 interacting protein	---	0	0	1	0	0	0	0	0	0	chr1	+	75525852	75525959	0	0
Stk11ip	e7.0	4559	4630	-1.03287	0.878721	chr1:75521529-75537334	serine/threonine kinase 11 interacting protein	---	0	0	1	0	0	0	0	0	0	chr1	+	75526087	75526158	0	0
Stk11ip	e8.0	5530	5656	1.06101	0.651221	chr1:75521529-75537334	serine/threonine kinase 11 interacting protein	---	0	0	1	0	0	0	0	0	0	chr1	+	75527058	75527184	0	0
Stk11ip	e9.0	5835	5938	1.13913	0.511695	chr1:75521529-75537334	serine/threonine kinase 11 interacting protein	---	0	0	1	0	0	0	0	0	0	chr1	+	75527363	75527466	0	0
Stk11ip	e10.0	6048	6143	1.07628	0.683566	chr1:75521529-75537334	serine/threonine kinase 11 interacting protein	---	0	0	1	0	0	0	0	0	0	chr1	+	75527576	75527671	0	0
Stk11ip	e11.0	6274	6315	1.27274	0.241555	chr1:75521529-75537334	serine/threonine kinase 11 interacting protein	---	0	0	1	0	0	0	0	0	0	chr1	+	75527802	75527843	0	0
Stk11ip	e12.0	6441	6590	1.11578	0.504533	chr1:75521529-75537334	serine/threonine kinase 11 interacting protein	---	0	0	1	0	0	0	0	0	0	chr1	+	75527969	75528118	0	0
Stk11ip	e13.0	6781	6865	1.08487	0.549575	chr1:75521529-75537334	serine/threonine kinase 11 interacting protein	---	0	0	1	0	0	0	0	0	0	chr1	+	75528309	75528393	0	0
Sgpp2	e1.0	1	346	-1.08027	0.806185	chr1:78310157-78420287	sphingosine-1-phosphate phosphatase 2	ENSMUSG00000032908	0	0	1	0	0	0	0	0	0	chr1	+	78310157	78310502	0	0
Sgpp2	e2.0	49915	50073	-1.13938	0.23541	chr1:78310157-78420287	sphingosine-1-phosphate phosphatase 2	ENSMUSG00000032908	0	0	1	0	0	0	0	0	0	chr1	+	78360071	78360229	0	1
Sgpp2	e3.0	80319	80498	1.11323	0.447447	chr1:78310157-78420287	sphingosine-1-phosphate phosphatase 2	ENSMUSG00000032908	0	0	1	0	0	0	0	0	0	chr1	+	78390475	78390654	0	1
Sgpp2	e4.0	83203	83292	-1.16164	0.286546	chr1:78310157-78420287	sphingosine-1-phosphate phosphatase 2	ENSMUSG00000032908	0	0	1	0	0	0	0	0	0	chr1	+	78393359	78393448	0	1
Acsl3 // Utp14b	e1.0	1	281	-1.11735	0.554768	chr1:78657823-78707743	acyl-CoA synthetase long-chain family member 3 // UTP14B small subunit processome component	---	0	0	1	0	0	0	0	0	0	chr1	+	78657823	78658103	0	0
Nyap2	e2.0	257	361	-1.37138	0.36183	chr1:81076948-81341764	neuronal tyrosine-phophorylated phosphoinositide 3-kinase adaptor 2	---	0	0	1	0	0	0	0	0	0	chr1	+	81077204	81077308	0	0
Fbxo36	e1.0	1	128	1.28206	0.40823	chr1:84839841-84900486	F-box protein 36	ENSMUSG00000073633	0	0	1	0	0	0	0	0	0	chr1	+	84839841	84839968	0	0
Cab39	e1.0	1	381	-1.13278	0.627116	chr1:85793441-85851577	calcium binding protein 39	---	0	0	1	0	0	0	0	0	0	chr1	+	85793441	85793821	0	0
Cab39	e3.0	1917	2033	-1.03148	0.849545	chr1:85793441-85851577	calcium binding protein 39	---	0	0	1	0	0	1	0	0	0	chr1	+	85795357	85795473	0	0
Cab39	e4.0	24917	25073	1.00166	0.985876	chr1:85793441-85851577	calcium binding protein 39	---	0	0	1	0	0	0	0	0	0	chr1	+	85818357	85818513	0	0
Cab39	e5.0	41883	42047	1.03827	0.505047	chr1:85793441-85851577	calcium binding protein 39	---	0	0	1	0	0	0	0	0	0	chr1	+	85835323	85835487	0	0
Cab39	e6.0	43846	43964	-1.03325	0.756123	chr1:85793441-85851577	calcium binding protein 39	---	0	0	1	0	0	0	0	0	0	chr1	+	85837286	85837404	0	0
Cab39	e7.0	48758	48926	-1.16113	0.473965	chr1:85793441-85851577	calcium binding protein 39	---	0	0	1	0	0	0	0	0	0	chr1	+	85842198	85842366	0	0
Cops7b	e1.0	1	176	-1.79332	0.247099	chr1:86582921-86609375	COP9 signalosome subunit 7B	ENSMUSG00000026240	0	0	1	0	0	0	0	0	0	chr1	+	86582921	86583096	0	0
Cops7b	e2.0	4096	4315	-1.08025	0.6767	chr1:86582921-86609375	COP9 signalosome subunit 7B	ENSMUSG00000026240	0	0	1	0	0	1	0	0	0	chr1	+	86587016	86587235	0	0
Cops7b	e3.0	6244	6421	-1.07032	0.40052	chr1:86582921-86609375	COP9 signalosome subunit 7B	ENSMUSG00000026240	0	0	1	0	0	0	0	0	0	chr1	+	86589164	86589341	0	1
Cops7b	e4.0	9371	9446	1.00864	0.927727	chr1:86582921-86609375	COP9 signalosome subunit 7B	ENSMUSG00000026240	0	0	1	0	0	0	0	0	0	chr1	+	86592291	86592366	0	1
Eif4e2	e1.0	1	110	1.28368	0.20356	chr1:87213910-87240488	eukaryotic translation initiation factor 4E member 2	---	0	0	1	0	0	0	0	0	0	chr1	+	87213910	87214019	0	0
Eif4e2	e2.0	431	586	-1.04211	0.612504	chr1:87213910-87240488	eukaryotic translation initiation factor 4E member 2	---	0	0	1	1	0	0	0	0	0	chr1	+	87214340	87214495	0	0
Gigyf2	e1.0	1	95	2.25396	0.00387518	chr1:87326998-87450810	GRB10 interacting GYF protein 2	---	0	0	1	0	0	0	0	0	0	chr1	+	87326998	87327092	0	0
Gigyf2	e2.0	7273	7337	2.05429	0.00639896	chr1:87326998-87450810	GRB10 interacting GYF protein 2	---	0	0	1	0	0	0	0	0	0	chr1	+	87334270	87334334	0	1
Gigyf2	e3.0	27407	27489	1.95457	0.00751304	chr1:87326998-87450810	GRB10 interacting GYF protein 2	---	0	0	1	0	0	0	0	0	0	chr1	+	87354404	87354486	0	1
Gigyf2	e5.0	37107	37236	-1.13558	0.443869	chr1:87326998-87450810	GRB10 interacting GYF protein 2	---	1	0	1	0	0	0	0	0	0	chr1	+	87364104	87364233	0	0
Gigyf2	e6.0	38187	38282	-1.15337	0.598249	chr1:87326998-87450810	GRB10 interacting GYF protein 2	---	1	0	1	0	0	0	0	0	0	chr1	+	87365184	87365279	0	0
Gigyf2	e7.0	47000	47114	-1.39963	0.243417	chr1:87326998-87450810	GRB10 interacting GYF protein 2	---	1	0	1	0	0	0	0	0	0	chr1	+	87373997	87374111	0	0
Gigyf2	e8.0	51975	52086	-1.48357	0.265181	chr1:87326998-87450810	GRB10 interacting GYF protein 2	---	1	0	1	0	0	1	0	0	0	chr1	+	87378972	87379083	0	0
Gigyf2	e9.0	52971	53011	-1.57084	0.247695	chr1:87326998-87450810	GRB10 interacting GYF protein 2	---	1	0	1	0	0	1	0	0	0	chr1	+	87379968	87380008	0	0
Gigyf2	e10.0	76670	76849	-1.2936	0.361112	chr1:87326998-87450810	GRB10 interacting GYF protein 2	---	1	0	1	0	0	0	0	0	0	chr1	+	87403667	87403846	0	0
Gigyf2	e12.0	80296	80458	-1.30182	0.165874	chr1:87326998-87450810	GRB10 interacting GYF protein 2	---	1	0	1	0	0	0	0	0	0	chr1	+	87407293	87407455	0	1
Gigyf2	e14.0	83665	83861	-1.91944	0.0126944	chr1:87326998-87450810	GRB10 interacting GYF protein 2	---	1	0	1	0	0	0	0	0	0	chr1	+	87410662	87410858	0	1
Gigyf2	e15.0	84711	84870	-1.52792	0.0119601	chr1:87326998-87450810	GRB10 interacting GYF protein 2	---	1	0	1	0	0	0	0	0	0	chr1	+	87411708	87411867	0	1
Gigyf2	e16.0	89821	89987	-1.53178	0.0738855	chr1:87326998-87450810	GRB10 interacting GYF protein 2	---	1	0	1	0	0	0	0	0	0	chr1	+	87416818	87416984	0	1
Gigyf2	e17.0	92091	92182	-1.7697	0.0209052	chr1:87326998-87450810	GRB10 interacting GYF protein 2	---	1	0	1	0	0	0	0	0	0	chr1	+	87419088	87419179	0	1
Gigyf2	e18.0	93288	93395	1.00803	0.958453	chr1:87326998-87450810	GRB10 interacting GYF protein 2	---	1	0	1	0	0	0	0	0	0	chr1	+	87420285	87420392	0	1
Gigyf2	e19.0	94494	94594	1.0694	0.746464	chr1:87326998-87450810	GRB10 interacting GYF protein 2	---	1	0	1	0	0	0	0	0	0	chr1	+	87421491	87421591	0	1
Gigyf2	e20.0	96184	96284	-1.1802	0.407624	chr1:87326998-87450810	GRB10 interacting GYF protein 2	---	1	0	1	0	0	0	0	0	0	chr1	+	87423181	87423281	0	1
Gigyf2	e21.0	98068	98229	-1.37255	0.172482	chr1:87326998-87450810	GRB10 interacting GYF protein 2	---	1	0	1	0	0	0	0	0	0	chr1	+	87425065	87425226	0	0
Gigyf2	e22.0	101573	101731	-1.27269	0.448036	chr1:87326998-87450810	GRB10 interacting GYF protein 2	---	1	0	1	0	0	0	0	0	0	chr1	+	87428570	87428728	0	0
Atg16l1	e1.0	1	304	-1.04474	0.815592	chr1:87756011-87792429	autophagy related 16-like 1 (S. cerevisiae)	---	0	0	1	0	0	0	0	0	0	chr1	+	87756011	87756314	0	0
Atg16l1	e2.0	4041	4134	-1.05669	0.633438	chr1:87756011-87792429	autophagy related 16-like 1 (S. cerevisiae)	---	0	0	1	0	0	0	0	0	0	chr1	+	87760051	87760144	0	2
Atg16l1	e3.0	9328	9433	-1.13502	0.132353	chr1:87756011-87792429	autophagy related 16-like 1 (S. cerevisiae)	---	0	0	1	0	0	0	0	0	0	chr1	+	87765338	87765443	0	2
Atg16l1	e4.0	10099	10172	1.02403	0.800438	chr1:87756011-87792429	autophagy related 16-like 1 (S. cerevisiae)	---	0	0	1	0	0	0	0	0	0	chr1	+	87766109	87766182	0	2
Atg16l1	e7.0	18135	18221	-1.03927	0.524479	chr1:87756011-87792429	autophagy related 16-like 1 (S. cerevisiae)	---	1	0	1	0	0	0	0	0	0	chr1	+	87774145	87774231	0	1
Atg16l1	e8.0	18803	18859	-1.06048	0.473178	chr1:87756011-87792429	autophagy related 16-like 1 (S. cerevisiae)	---	1	0	1	1	0	1	0	0	0	chr1	+	87774813	87774869	0	0
Atg16l1	e9.0	19071	19118	-1.03561	0.767424	chr1:87756011-87792429	autophagy related 16-like 1 (S. cerevisiae)	---	1	0	1	1	1	1	0	0	0	chr1	+	87775081	87775128	0	0
Atg16l1	e10.0	19747	19849	-1.06431	0.389287	chr1:87756011-87792429	autophagy related 16-like 1 (S. cerevisiae)	---	1	0	1	0	0	0	0	0	0	chr1	+	87775757	87775859	0	1
Dgkd	e1.0	1	170	-1.43207	0.0388672	chr1:87853287-87945180	diacylglycerol kinase, delta	ENSMUSG00000070738	0	0	1	0	0	0	0	0	0	chr1	+	87853287	87853456	0	0
Dgkd	e2.0	27082	27192	-1.05356	0.739369	chr1:87853287-87945180	diacylglycerol kinase, delta	ENSMUSG00000070738	0	0	1	0	0	0	0	0	0	chr1	+	87880368	87880478	0	0
Dgkd	e3.0	28573	28653	-1.21149	0.106404	chr1:87853287-87945180	diacylglycerol kinase, delta	ENSMUSG00000070738	0	0	1	0	0	0	0	0	0	chr1	+	87881859	87881939	0	0
Dgkd	e4.0	61814	61918	-1.10266	0.574953	chr1:87853287-87945180	diacylglycerol kinase, delta	ENSMUSG00000070738	0	0	1	0	0	0	0	0	0	chr1	+	87915100	87915204	0	0
Dgkd	e5.0	62206	62338	-1.09545	0.495379	chr1:87853287-87945180	diacylglycerol kinase, delta	ENSMUSG00000070738	0	0	1	0	0	0	0	0	0	chr1	+	87915492	87915624	0	0
Dgkd	e6.0	63083	63189	-1.06214	0.702762	chr1:87853287-87945180	diacylglycerol kinase, delta	ENSMUSG00000070738	0	0	1	0	0	0	0	0	0	chr1	+	87916369	87916475	0	0
Dgkd	e7.0	63521	63646	-1.06248	0.589053	chr1:87853287-87945180	diacylglycerol kinase, delta	ENSMUSG00000070738	0	0	1	0	0	0	0	0	0	chr1	+	87916807	87916932	0	0
Dgkd	e8.0	64606	64708	-1.0431	0.73514	chr1:87853287-87945180	diacylglycerol kinase, delta	ENSMUSG00000070738	0	0	1	0	0	0	0	0	0	chr1	+	87917892	87917994	0	0
Dgkd	e9.0	65273	65435	1.02858	0.705951	chr1:87853287-87945180	diacylglycerol kinase, delta	ENSMUSG00000070738	0	0	1	0	0	0	0	0	0	chr1	+	87918559	87918721	0	0
Dgkd	e10.0	68287	68395	-1.11158	0.047	chr1:87853287-87945180	diacylglycerol kinase, delta	ENSMUSG00000070738	0	0	1	0	0	0	0	0	0	chr1	+	87921573	87921681	0	0
Dgkd	e11.0	70786	70925	-1.05685	0.445233	chr1:87853287-87945180	diacylglycerol kinase, delta	ENSMUSG00000070738	0	0	1	0	0	0	0	0	0	chr1	+	87924072	87924211	0	0
Dgkd	e12.0	71194	71278	1.05202	0.685044	chr1:87853287-87945180	diacylglycerol kinase, delta	ENSMUSG00000070738	0	0	1	0	0	0	0	0	0	chr1	+	87924480	87924564	0	0
Dgkd	e13.0	72408	72502	1.01254	0.868141	chr1:87853287-87945180	diacylglycerol kinase, delta	ENSMUSG00000070738	0	0	1	0	0	0	0	0	0	chr1	+	87925694	87925788	0	0
Dgkd	e14.0	72587	72686	1.03185	0.781969	chr1:87853287-87945180	diacylglycerol kinase, delta	ENSMUSG00000070738	0	0	1	0	0	0	0	0	0	chr1	+	87925873	87925972	0	0
Dgkd	e15.0	72765	73038	-1.10089	0.22256	chr1:87853287-87945180	diacylglycerol kinase, delta	ENSMUSG00000070738	0	0	1	0	0	0	0	0	0	chr1	+	87926051	87926324	0	0
Dgkd	e16.0	73580	73738	1.00424	0.974752	chr1:87853287-87945180	diacylglycerol kinase, delta	ENSMUSG00000070738	0	0	1	0	0	0	0	0	0	chr1	+	87926866	87927024	0	0
Dgkd	e17.0	74399	74524	1.00405	0.976048	chr1:87853287-87945180	diacylglycerol kinase, delta	ENSMUSG00000070738	0	0	1	0	0	0	0	0	0	chr1	+	87927685	87927810	0	0
Dgkd	e18.0	76455	76551	-1.10805	0.343822	chr1:87853287-87945180	diacylglycerol kinase, delta	ENSMUSG00000070738	0	0	1	0	0	0	0	0	0	chr1	+	87929741	87929837	0	0
Dgkd	e19.0	78646	78756	1.00194	0.990456	chr1:87853287-87945180	diacylglycerol kinase, delta	ENSMUSG00000070738	0	0	1	0	0	0	0	0	0	chr1	+	87931932	87932042	0	0
Dgkd	e20.0	80820	80916	1.09105	0.576908	chr1:87853287-87945180	diacylglycerol kinase, delta	ENSMUSG00000070738	0	0	1	0	0	0	0	0	0	chr1	+	87934106	87934202	0	0
Dgkd	e21.0	81108	81215	1.00756	0.899704	chr1:87853287-87945180	diacylglycerol kinase, delta	ENSMUSG00000070738	0	0	1	0	0	0	0	0	0	chr1	+	87934394	87934501	0	0
Agap1	e1.0	1	788	-1.16769	0.267754	chr1:89454805-89897617	ArfGAP with GTPase domain, ankyrin repeat and PH domain 1	---	0	0	1	0	0	0	0	0	0	chr1	+	89454805	89455592	0	0
Agap1	e2.0	125429	126849	1.07599	0.694519	chr1:89454805-89897617	ArfGAP with GTPase domain, ankyrin repeat and PH domain 1	---	0	0	1	0	0	0	0	0	0	chr1	+	89580233	89581653	0	0
Lrrfip1	e1.0	1	167	-1.55857	0.45754	chr1:90998727-91128944	leucine rich repeat (in FLII) interacting protein 1	---	0	0	1	0	0	0	0	0	0	chr1	+	90998727	90998893	0	0
Traf3ip1	e1.0	1	222	1.20561	0.536454	chr1:91494667-91529372	TRAF3 interacting protein 1	---	0	0	1	0	0	0	0	0	0	chr1	+	91494667	91494888	0	0
Traf3ip1	e2.0	3287	3355	1.13729	0.555277	chr1:91494667-91529372	TRAF3 interacting protein 1	---	0	0	1	0	0	0	0	0	0	chr1	+	91497953	91498021	0	1
Traf3ip1	e3.0	4836	4997	1.07977	0.668925	chr1:91494667-91529372	TRAF3 interacting protein 1	---	0	0	1	0	0	0	0	0	0	chr1	+	91499502	91499663	0	1
Traf3ip1	e4.0	6107	6244	-1.17829	0.213071	chr1:91494667-91529372	TRAF3 interacting protein 1	---	0	0	1	0	0	0	0	0	0	chr1	+	91500773	91500910	0	1
Traf3ip1	e5.0	6339	6758	1.03662	0.627317	chr1:91494667-91529372	TRAF3 interacting protein 1	---	0	0	1	0	0	0	0	0	0	chr1	+	91501005	91501424	0	1
Traf3ip1	e6.0	10757	10828	-1.04066	0.855245	chr1:91494667-91529372	TRAF3 interacting protein 1	---	0	0	1	0	0	0	0	0	0	chr1	+	91505423	91505494	0	1
Traf3ip1	e7.0	12827	12902	-1.22865	0.244386	chr1:91494667-91529372	TRAF3 interacting protein 1	---	0	0	1	0	0	0	0	0	0	chr1	+	91507493	91507568	0	1
Asb1	e1.0	1	322	-1.33404	0.480139	chr1:91540543-91559590	ankyrin repeat and SOCS box-containing 1	---	0	0	1	0	0	0	0	0	0	chr1	+	91540543	91540864	0	0
Atg4b	e1.0	1	151	1.0208	0.851727	chr1:93754904-93789795	autophagy related 4B, cysteine peptidase	ENSMUSG00000026280	0	0	1	0	0	0	0	0	0	chr1	+	93754904	93755054	0	0
Ing5	e1.0	1	76	1.02616	0.924432	chr1:93803964-93822101	inhibitor of growth family, member 5	ENSMUSG00000026283	0	0	1	0	0	0	0	0	0	chr1	+	93803964	93804039	0	0
Gin1	e1.0	1	89	1.3313	0.201188	chr1:97770167-97793708	gypsy retrotransposon integrase 1	---	0	0	1	0	0	0	0	0	0	chr1	+	97770167	97770255	0	0
Clasp1	e2.0	30385	30863	-1.15292	0.350927	chr1:118389056-118609445	CLIP associating protein 1	---	0	0	1	0	0	0	0	0	0	chr1	+	118419440	118419918	0	1
Clasp1	e3.0	70746	70824	-1.05818	0.70895	chr1:118389056-118609445	CLIP associating protein 1	---	0	0	1	0	0	0	0	0	0	chr1	+	118459801	118459879	0	1
Clasp1	e4.0	72132	72235	1.11329	0.376486	chr1:118389056-118609445	CLIP associating protein 1	---	0	0	1	0	0	0	0	0	0	chr1	+	118461187	118461290	0	1
Clasp1	e5.0	73411	73502	1.00716	0.963056	chr1:118389056-118609445	CLIP associating protein 1	---	0	0	1	0	0	0	0	0	0	chr1	+	118462466	118462557	0	1
Clasp1	e6.0	75473	75548	1.06086	0.689992	chr1:118389056-118609445	CLIP associating protein 1	---	0	0	1	0	0	0	0	0	0	chr1	+	118464528	118464603	0	1
Clasp1	e7.0	78825	78922	-1.09689	0.69354	chr1:118389056-118609445	CLIP associating protein 1	---	0	0	1	0	0	0	0	0	0	chr1	+	118467880	118467977	0	1
Clasp1	e8.0	82717	82784	-1.23066	0.335412	chr1:118389056-118609445	CLIP associating protein 1	---	0	0	1	0	0	0	0	0	0	chr1	+	118471772	118471839	0	1
Clasp1	e9.0	108579	108731	1.03037	0.825437	chr1:118389056-118609445	CLIP associating protein 1	---	0	0	1	0	0	0	0	0	0	chr1	+	118497634	118497786	0	1
Clasp1	e10.0	110593	110666	-1.10898	0.641729	chr1:118389056-118609445	CLIP associating protein 1	---	0	0	1	0	0	0	0	0	0	chr1	+	118499648	118499721	0	1
Clasp1	e11.0	112247	112339	-1.08689	0.681878	chr1:118389056-118609445	CLIP associating protein 1	---	0	0	1	0	0	0	0	0	0	chr1	+	118501302	118501394	0	1
Clasp1	e13.0	114765	114900	1.09389	0.590329	chr1:118389056-118609445	CLIP associating protein 1	---	1	0	1	0	0	0	0	0	0	chr1	+	118503820	118503955	0	1
Clasp1	e14.0	115841	115911	1.15254	0.298236	chr1:118389056-118609445	CLIP associating protein 1	---	1	0	1	0	0	0	0	0	0	chr1	+	118504896	118504966	0	1
Clasp1	e15.0	116427	116486	1.11228	0.544156	chr1:118389056-118609445	CLIP associating protein 1	---	1	0	1	0	0	0	0	0	0	chr1	+	118505482	118505541	0	1
Clasp1	e16.0	117885	117962	-1.06167	0.577641	chr1:118389056-118609445	CLIP associating protein 1	---	1	0	1	0	0	0	0	0	0	chr1	+	118506940	118507017	0	1
Clasp1	e17.0	119760	119927	1.03373	0.841778	chr1:118389056-118609445	CLIP associating protein 1	---	1	0	1	0	0	0	0	0	0	chr1	+	118508815	118508982	0	1
Clasp1	e18.0	120517	120566	-1.27603	0.214506	chr1:118389056-118609445	CLIP associating protein 1	---	1	0	1	0	0	0	0	0	0	chr1	+	118509572	118509621	0	1
Clasp1	e19.0	121151	121321	-1.30046	0.128019	chr1:118389056-118609445	CLIP associating protein 1	---	1	0	1	0	0	0	0	0	0	chr1	+	118510206	118510376	0	1
Clasp1	e21.0	123650	123673	-1.41939	0.158887	chr1:118389056-118609445	CLIP associating protein 1	---	1	0	1	0	0	1	0	0	1	chr1	+	118512705	118512728	1	0
Clasp1	e22.0	132772	132879	-1.26189	0.471518	chr1:118389056-118609445	CLIP associating protein 1	---	1	0	1	0	0	0	0	0	0	chr1	+	118521827	118521934	0	1
Clasp1	e23.0	134266	134292	-1.09501	0.657575	chr1:118389056-118609445	CLIP associating protein 1	---	1	0	1	0	0	1	0	0	0	chr1	+	118523321	118523347	1	0
Clasp1	e24.0	136242	136400	1.16138	0.260819	chr1:118389056-118609445	CLIP associating protein 1	---	1	0	1	0	0	0	0	0	0	chr1	+	118525297	118525455	0	1
Clasp1	e25.0	142923	143030	1.12358	0.370315	chr1:118389056-118609445	CLIP associating protein 1	---	1	0	1	0	0	1	0	0	1	chr1	+	118531978	118532085	0	0
Slc35f5	e1.0	1	223	-1.53581	0.397141	chr1:125560595-125595834	solute carrier family 35, member F5	ENSMUSG00000026342	0	0	1	0	0	0	0	0	0	chr1	+	125560595	125560817	0	0
Slc35f5	e2.0	408	690	-1.60346	0.315981	chr1:125560595-125595834	solute carrier family 35, member F5	ENSMUSG00000026342	0	0	1	0	0	0	0	0	0	chr1	+	125561002	125561284	0	0
Ccnt2	e1.0	1	222	1.14708	0.496235	chr1:127774164-127808058	cyclin T2	ENSMUSG00000026349	0	0	1	0	0	0	0	0	0	chr1	+	127774164	127774385	0	0
Ccnt2	e2.0	938	1019	1.00253	0.987925	chr1:127774164-127808058	cyclin T2	ENSMUSG00000026349	0	0	1	0	0	0	0	0	0	chr1	+	127775101	127775182	0	2
Ccnt2	e3.0	17442	17570	-1.05687	0.70919	chr1:127774164-127808058	cyclin T2	ENSMUSG00000026349	0	0	1	0	0	0	0	0	0	chr1	+	127791605	127791733	0	2
Ccnt2	e4.0	19195	19255	-1.07818	0.699973	chr1:127774164-127808058	cyclin T2	ENSMUSG00000026349	0	0	1	0	0	0	0	0	0	chr1	+	127793358	127793418	0	2
Ccnt2	e5.0	21092	21154	-1.04404	0.8254	chr1:127774164-127808058	cyclin T2	ENSMUSG00000026349	0	0	1	0	0	0	0	0	0	chr1	+	127795255	127795317	0	2
Rab3gap1	e1.0	1	57	1.42528	0.0507874	chr1:127868773-127943876	RAB3 GTPase activating protein subunit 1	---	0	0	1	0	0	0	0	0	0	chr1	+	127868773	127868829	0	0
Rab3gap1	e2.0	153	208	1.18583	0.115691	chr1:127868773-127943876	RAB3 GTPase activating protein subunit 1	---	0	0	1	0	0	0	0	0	0	chr1	+	127868925	127868980	0	1
Rab3gap1	e3.0	5308	5383	1.1021	0.271016	chr1:127868773-127943876	RAB3 GTPase activating protein subunit 1	---	0	0	1	0	0	0	0	0	0	chr1	+	127874080	127874155	0	1
Rab3gap1	e6.0	20384	20516	1.16683	0.0735748	chr1:127868773-127943876	RAB3 GTPase activating protein subunit 1	---	1	0	1	0	0	0	0	0	0	chr1	+	127889156	127889288	0	1
Rab3gap1	e7.0	22246	22324	1.15006	0.161044	chr1:127868773-127943876	RAB3 GTPase activating protein subunit 1	---	1	0	1	0	0	0	0	0	0	chr1	+	127891018	127891096	0	1
Rab3gap1	e8.0	32807	32926	1.11092	0.194784	chr1:127868773-127943876	RAB3 GTPase activating protein subunit 1	---	1	0	1	0	0	0	0	0	0	chr1	+	127901579	127901698	0	1
Rab3gap1	e9.0	34900	35065	-1.03939	0.619567	chr1:127868773-127943876	RAB3 GTPase activating protein subunit 1	---	1	0	1	0	0	0	0	0	0	chr1	+	127903672	127903837	0	1
Rab3gap1	e10.0	41079	41178	1.02273	0.672862	chr1:127868773-127943876	RAB3 GTPase activating protein subunit 1	---	1	0	1	0	0	0	0	0	0	chr1	+	127909851	127909950	0	1
Rab3gap1	e11.0	46867	46948	-1.12675	0.105332	chr1:127868773-127943876	RAB3 GTPase activating protein subunit 1	---	1	0	1	0	0	0	0	0	0	chr1	+	127915639	127915720	0	1
Rab3gap1	e12.0	49449	49517	-1.16374	0.143652	chr1:127868773-127943876	RAB3 GTPase activating protein subunit 1	---	1	0	1	0	0	0	0	0	0	chr1	+	127918221	127918289	0	1
Rab3gap1	e13.0	50796	50869	-1.01709	0.873932	chr1:127868773-127943876	RAB3 GTPase activating protein subunit 1	---	1	0	1	0	0	0	0	0	0	chr1	+	127919568	127919641	0	1
R3hdm1	e1.0	1	185	-1.54053	0.0794347	chr1:128103299-128237738	R3H domain containing 1	ENSMUSG00000056211	0	0	1	0	0	0	0	0	0	chr1	+	128103299	128103483	0	0
R3hdm1	e2.0	38689	38794	1.01453	0.762775	chr1:128103299-128237738	R3H domain containing 1	ENSMUSG00000056211	0	0	1	0	0	0	0	0	0	chr1	+	128141987	128142092	0	0
R3hdm1	e3.0	48446	48654	-1.04009	0.546723	chr1:128103299-128237738	R3H domain containing 1	ENSMUSG00000056211	0	0	1	0	0	0	0	0	0	chr1	+	128151744	128151952	0	0
R3hdm1	e4.0	49891	50101	1.0912	0.233546	chr1:128103299-128237738	R3H domain containing 1	ENSMUSG00000056211	0	0	1	0	0	0	0	0	0	chr1	+	128153189	128153399	0	0
R3hdm1	e5.0	58904	58945	1.02871	0.798642	chr1:128103299-128237738	R3H domain containing 1	ENSMUSG00000056211	0	0	1	0	0	1	0	0	0	chr1	+	128162202	128162243	0	0
R3hdm1	e6.0	59471	59560	-1.02184	0.72521	chr1:128103299-128237738	R3H domain containing 1	ENSMUSG00000056211	0	0	1	0	0	1	0	0	0	chr1	+	128162769	128162858	0	0
R3hdm1	e7.0	64595	64709	-1.07408	0.246874	chr1:128103299-128237738	R3H domain containing 1	ENSMUSG00000056211	0	0	1	0	0	0	0	0	0	chr1	+	128167893	128168007	0	0
R3hdm1	e8.0	65681	65759	-1.08364	0.595204	chr1:128103299-128237738	R3H domain containing 1	ENSMUSG00000056211	0	0	1	0	0	0	0	0	0	chr1	+	128168979	128169057	0	0
R3hdm1	e9.0	71651	71710	-1.00573	0.962149	chr1:128103299-128237738	R3H domain containing 1	ENSMUSG00000056211	0	0	1	0	0	0	0	0	0	chr1	+	128174949	128175008	0	0
R3hdm1	e10.0	71794	71934	-1.0579	0.429775	chr1:128103299-128237738	R3H domain containing 1	ENSMUSG00000056211	0	0	1	0	0	0	0	0	0	chr1	+	128175092	128175232	0	0
R3hdm1	e12.0	75585	75693	-1.18169	0.148601	chr1:128103299-128237738	R3H domain containing 1	ENSMUSG00000056211	1	0	1	0	0	0	0	0	0	chr1	+	128178883	128178991	0	1
R3hdm1	e13.0	75789	75884	-1.06915	0.539201	chr1:128103299-128237738	R3H domain containing 1	ENSMUSG00000056211	1	0	1	0	0	0	0	0	0	chr1	+	128179087	128179182	0	0
R3hdm1	e14.0	78419	78456	-1.07385	0.565453	chr1:128103299-128237738	R3H domain containing 1	ENSMUSG00000056211	1	0	1	0	0	0	0	0	0	chr1	+	128181717	128181754	0	0
R3hdm1	e15.0	78540	78590	1.01993	0.833751	chr1:128103299-128237738	R3H domain containing 1	ENSMUSG00000056211	1	0	1	0	0	0	0	0	0	chr1	+	128181838	128181888	0	0
R3hdm1	e16.0	78688	78914	-1.05717	0.497261	chr1:128103299-128237738	R3H domain containing 1	ENSMUSG00000056211	0	0	1	0	0	0	0	0	0	chr1	+	128181986	128182212	0	0
R3hdm1	e17.0	81102	81356	-1.07428	0.175669	chr1:128103299-128237738	R3H domain containing 1	ENSMUSG00000056211	1	0	1	0	0	0	0	0	0	chr1	+	128184400	128184654	0	0
R3hdm1	e18.0	83460	83611	-1.20442	0.000808433	chr1:128103299-128237738	R3H domain containing 1	ENSMUSG00000056211	1	0	1	0	0	0	0	0	0	chr1	+	128186758	128186909	0	0
R3hdm1	e19.0	87340	87441	-1.23542	0.0660785	chr1:128103299-128237738	R3H domain containing 1	ENSMUSG00000056211	1	0	1	0	0	1	0	0	0	chr1	+	128190638	128190739	0	0
R3hdm1	e20.0	90162	90458	-1.04916	0.446708	chr1:128103299-128237738	R3H domain containing 1	ENSMUSG00000056211	1	0	1	0	0	0	0	0	0	chr1	+	128193460	128193756	0	0
R3hdm1	e21.0	93676	93799	-1.02709	0.768104	chr1:128103299-128237738	R3H domain containing 1	ENSMUSG00000056211	1	0	1	0	0	0	0	0	0	chr1	+	128196974	128197097	0	0
R3hdm1	e22.0	107907	108061	1.02617	0.707921	chr1:128103299-128237738	R3H domain containing 1	ENSMUSG00000056211	1	0	1	0	0	0	0	0	0	chr1	+	128211205	128211359	0	0
R3hdm1	e23.0	113103	113254	1.01163	0.758835	chr1:128103299-128237738	R3H domain containing 1	ENSMUSG00000056211	1	0	1	0	0	0	0	0	0	chr1	+	128216401	128216552	0	0
R3hdm1	e24.0	118302	118405	-1.00571	0.941263	chr1:128103299-128237738	R3H domain containing 1	ENSMUSG00000056211	1	0	1	0	0	0	0	0	0	chr1	+	128221600	128221703	0	0
R3hdm1	e25.0	120171	120343	1.01509	0.808224	chr1:128103299-128237738	R3H domain containing 1	ENSMUSG00000056211	1	0	1	0	0	0	0	0	0	chr1	+	128223469	128223641	0	0
R3hdm1	e26.0	128025	128169	-1.00757	0.891237	chr1:128103299-128237738	R3H domain containing 1	ENSMUSG00000056211	1	0	1	0	0	0	0	0	0	chr1	+	128231323	128231467	0	0
R3hdm1	e27.0	131768	131850	1.02562	0.652219	chr1:128103299-128237738	R3H domain containing 1	ENSMUSG00000056211	1	0	1	0	0	0	0	0	0	chr1	+	128235066	128235148	0	0
AA986860	e2.0	5528	5713	1.36021	0.39156	chr1:130731975-130744621	expressed sequence AA986860	ENSMUSG00000042510	0	0	1	0	0	0	0	0	0	chr1	+	130737502	130737687	0	0
Nucks1	e1.0	1	293	1.01244	0.8907	chr1:131910458-131936321	nuclear casein kinase and cyclin-dependent kinase substrate 1	---	0	0	1	0	0	0	0	0	0	chr1	+	131910458	131910750	0	0
Nucks1	e2.0	8548	8597	1.0159	0.82962	chr1:131910458-131936321	nuclear casein kinase and cyclin-dependent kinase substrate 1	---	0	0	1	0	0	0	0	0	0	chr1	+	131919005	131919054	0	0
Nucks1	e3.0	11486	11591	1.07689	0.438816	chr1:131910458-131936321	nuclear casein kinase and cyclin-dependent kinase substrate 1	---	0	0	1	0	0	0	0	0	0	chr1	+	131921943	131922048	0	0
Nucks1	e4.0	14129	14184	1.02127	0.799586	chr1:131910458-131936321	nuclear casein kinase and cyclin-dependent kinase substrate 1	---	0	0	1	0	0	0	0	0	0	chr1	+	131924586	131924641	0	0
Nucks1	e5.0	17607	17759	-1.06081	0.524799	chr1:131910458-131936321	nuclear casein kinase and cyclin-dependent kinase substrate 1	---	0	0	1	0	0	0	0	0	0	chr1	+	131928064	131928216	0	0
Lemd1	e2.0	9535	9644	1.20359	0.167951	chr1:132191429-132259227	LEM domain containing 1	---	0	0	1	0	0	0	0	0	0	chr1	+	132200963	132201072	0	0
Dstyk	e1.0	1	418	-1.01085	0.955966	chr1:132417453-132466959	dual serine/threonine and tyrosine protein kinase	ENSMUSG00000042046	0	0	1	0	0	0	0	0	0	chr1	+	132417453	132417870	0	0
Dstyk	e3.0	31860	32523	-1.07646	0.469191	chr1:132417453-132466959	dual serine/threonine and tyrosine protein kinase	ENSMUSG00000042046	0	0	1	0	0	0	0	0	0	chr1	+	132449312	132449975	0	0
Dstyk	e4.0	35635	35867	-1.12943	0.167702	chr1:132417453-132466959	dual serine/threonine and tyrosine protein kinase	ENSMUSG00000042046	0	0	1	0	0	0	0	0	0	chr1	+	132453087	132453319	0	0
Dstyk	e5.0	36609	36692	-1.15084	0.0498567	chr1:132417453-132466959	dual serine/threonine and tyrosine protein kinase	ENSMUSG00000042046	0	0	1	0	0	0	0	0	0	chr1	+	132454061	132454144	0	0
Rbbp5	e1.0	1	167	1.05385	0.758816	chr1:132477361-132505665	retinoblastoma binding protein 5, histone lysine methyltransferase complex subunit	---	0	0	1	0	0	0	0	0	0	chr1	+	132477361	132477527	0	0
Rbbp5	e2.0	6692	6717	-1.07137	0.720425	chr1:132477361-132505665	retinoblastoma binding protein 5, histone lysine methyltransferase complex subunit	---	0	0	1	0	0	0	0	0	0	chr1	+	132484052	132484077	1	1
Rbbp5	e5.0	12228	12368	-1.1867	0.037798	chr1:132477361-132505665	retinoblastoma binding protein 5, histone lysine methyltransferase complex subunit	---	0	0	1	0	0	0	0	0	0	chr1	+	132489588	132489728	0	1
Rbbp5	e6.0	13063	13225	-1.02276	0.593109	chr1:132477361-132505665	retinoblastoma binding protein 5, histone lysine methyltransferase complex subunit	---	0	0	1	0	0	0	0	0	0	chr1	+	132490423	132490585	0	1
Rbbp5	e7.0	15193	15302	-1.01454	0.866636	chr1:132477361-132505665	retinoblastoma binding protein 5, histone lysine methyltransferase complex subunit	---	0	0	1	0	0	0	0	0	0	chr1	+	132492553	132492662	0	1
Rbbp5	e8.0	16455	16574	1.06775	0.404863	chr1:132477361-132505665	retinoblastoma binding protein 5, histone lysine methyltransferase complex subunit	---	0	0	1	0	0	0	0	0	0	chr1	+	132493815	132493934	0	1
Rbbp5	e9.0	16661	16814	1.06002	0.519745	chr1:132477361-132505665	retinoblastoma binding protein 5, histone lysine methyltransferase complex subunit	---	0	0	1	0	0	0	0	0	0	chr1	+	132494021	132494174	0	1
Rbbp5	e10.0	16910	16981	-1.07539	0.653905	chr1:132477361-132505665	retinoblastoma binding protein 5, histone lysine methyltransferase complex subunit	---	0	0	1	0	0	0	0	0	0	chr1	+	132494270	132494341	0	1
Rbbp5	e11.0	17497	17614	-1.12273	0.330143	chr1:132477361-132505665	retinoblastoma binding protein 5, histone lysine methyltransferase complex subunit	---	0	0	1	0	0	0	0	0	0	chr1	+	132494857	132494974	0	1
Rbbp5	e12.0	18846	18915	1.10441	0.367717	chr1:132477361-132505665	retinoblastoma binding protein 5, histone lysine methyltransferase complex subunit	---	0	0	1	0	0	0	0	0	0	chr1	+	132496206	132496275	0	1
Rbbp5	e13.0	19439	19668	1.05548	0.345475	chr1:132477361-132505665	retinoblastoma binding protein 5, histone lysine methyltransferase complex subunit	---	0	0	1	0	0	0	0	0	0	chr1	+	132496799	132497028	0	1
Rbbp5	e14.0	20570	20647	-1.01723	0.85352	chr1:132477361-132505665	retinoblastoma binding protein 5, histone lysine methyltransferase complex subunit	---	0	0	1	0	0	0	0	0	0	chr1	+	132497930	132498007	0	1
Plekha6	e2.0	12913	12993	-1.544	0.2562	chr1:133246097-133303435	pleckstrin homology domain containing, family A member 6	---	0	0	1	0	0	0	0	0	0	chr1	+	133259009	133259089	0	0
Plekha6	e3.0	13946	14060	-1.42724	0.158254	chr1:133246097-133303435	pleckstrin homology domain containing, family A member 6	---	0	0	1	0	0	0	0	0	0	chr1	+	133260042	133260156	0	0
Plekha6	e4.0	17701	17805	1.06333	0.75066	chr1:133246097-133303435	pleckstrin homology domain containing, family A member 6	---	0	0	1	0	0	0	0	0	0	chr1	+	133263797	133263901	0	0
Plekha6	e5.0	18565	18637	1.04041	0.895394	chr1:133246097-133303435	pleckstrin homology domain containing, family A member 6	---	0	0	1	0	0	0	0	0	0	chr1	+	133264661	133264733	0	0
Plekha6	e6.0	20470	20570	1.00535	0.980591	chr1:133246097-133303435	pleckstrin homology domain containing, family A member 6	---	0	0	1	0	0	0	0	0	0	chr1	+	133266566	133266666	0	0
Plekha6	e8.0	26113	26595	1.02543	0.874225	chr1:133246097-133303435	pleckstrin homology domain containing, family A member 6	---	0	0	1	0	0	0	0	0	0	chr1	+	133272209	133272691	0	0
Plekha6	e9.0	27762	28278	-1.18425	0.402337	chr1:133246097-133303435	pleckstrin homology domain containing, family A member 6	---	0	0	1	0	0	0	0	0	0	chr1	+	133273858	133274374	0	0
Plekha6	e10.0	28697	28783	-1.05793	0.78061	chr1:133246097-133303435	pleckstrin homology domain containing, family A member 6	---	0	0	1	0	0	1	0	0	0	chr1	+	133274793	133274879	0	0
Plekha6	e11.0	29716	29769	1.05232	0.862861	chr1:133246097-133303435	pleckstrin homology domain containing, family A member 6	---	0	0	1	0	0	1	0	0	0	chr1	+	133275812	133275865	0	0
Plekha6	e12.0	33277	33357	1.15026	0.572936	chr1:133246097-133303435	pleckstrin homology domain containing, family A member 6	---	0	0	1	0	0	1	0	0	0	chr1	+	133279373	133279453	0	0
Plekha6	e13.0	34243	34311	1.05432	0.715545	chr1:133246097-133303435	pleckstrin homology domain containing, family A member 6	---	0	0	1	0	0	0	0	0	0	chr1	+	133280339	133280407	0	0
Plekha6	e14.0	35687	35767	1.05187	0.76926	chr1:133246097-133303435	pleckstrin homology domain containing, family A member 6	---	0	0	1	0	0	0	0	0	0	chr1	+	133281783	133281863	0	0
Plekha6	e15.0	36021	36170	1.1546	0.193262	chr1:133246097-133303435	pleckstrin homology domain containing, family A member 6	---	0	0	1	0	0	0	0	0	0	chr1	+	133282117	133282266	0	0
Plekha6	e16.0	37175	37270	-1.13329	0.53905	chr1:133246097-133303435	pleckstrin homology domain containing, family A member 6	---	0	0	1	0	0	0	0	0	0	chr1	+	133283271	133283366	0	0
Plekha6	e17.0	38784	38895	-1.00528	0.962088	chr1:133246097-133303435	pleckstrin homology domain containing, family A member 6	---	0	0	1	0	0	0	0	0	0	chr1	+	133284880	133284991	0	0
Plekha6	e18.0	39151	39290	1.20812	0.0967024	chr1:133246097-133303435	pleckstrin homology domain containing, family A member 6	---	0	0	1	0	0	0	0	0	0	chr1	+	133285247	133285386	0	0
Plekha6	e19.0	40151	40300	1.12565	0.360053	chr1:133246097-133303435	pleckstrin homology domain containing, family A member 6	---	0	0	1	0	0	1	0	0	0	chr1	+	133286247	133286396	0	0
Plekha6	e20.0	41374	41503	1.13551	0.242314	chr1:133246097-133303435	pleckstrin homology domain containing, family A member 6	---	0	0	1	0	0	0	0	0	0	chr1	+	133287470	133287599	0	0
Plekha6	e21.0	41678	41784	-1.16784	0.498123	chr1:133246097-133303435	pleckstrin homology domain containing, family A member 6	---	0	0	1	0	0	0	0	0	0	chr1	+	133287774	133287880	0	0
Plekha6	e22.0	46256	46432	-1.04673	0.50304	chr1:133246097-133303435	pleckstrin homology domain containing, family A member 6	---	0	0	1	0	0	0	0	0	0	chr1	+	133292352	133292528	0	1
Plekha6	e23.0	47610	47777	1.00007	0.99963	chr1:133246097-133303435	pleckstrin homology domain containing, family A member 6	---	1	0	1	0	0	0	0	0	0	chr1	+	133293706	133293873	0	0
Plekha6	e24.0	47858	47991	1.00039	0.995883	chr1:133246097-133303435	pleckstrin homology domain containing, family A member 6	---	1	0	1	0	0	0	0	0	0	chr1	+	133293954	133294087	0	1
Plekha6	e25.0	48467	48612	1.05733	0.654675	chr1:133246097-133303435	pleckstrin homology domain containing, family A member 6	---	1	0	1	0	0	0	0	0	0	chr1	+	133294563	133294708	0	1
Adipor1	e1.0	1	208	1.0968	0.613693	chr1:134415378-134433348	adiponectin receptor 1	---	0	0	1	0	0	0	0	0	0	chr1	+	134415378	134415585	0	0
Adipor1	e2.0	287	612	-1.18649	0.0491098	chr1:134415378-134433348	adiponectin receptor 1	---	0	0	1	1	0	0	0	0	0	chr1	+	134415664	134415989	0	0
Klhl12	e1.0	1	137	1.00537	0.983007	chr1:134455529-134491018	kelch-like 12	---	0	0	1	0	0	0	0	0	0	chr1	+	134455529	134455665	0	0
Klhl12	e2.0	2938	3138	1.10634	0.102862	chr1:134455529-134491018	kelch-like 12	---	0	0	1	0	0	0	0	0	0	chr1	+	134458466	134458666	0	2
Klhl12	e3.0	8299	8452	-1.03363	0.722372	chr1:134455529-134491018	kelch-like 12	---	0	0	1	0	0	0	0	0	0	chr1	+	134463827	134463980	0	2
Klhl12	e4.0	12123	12340	-1.01447	0.773216	chr1:134455529-134491018	kelch-like 12	---	1	0	1	0	0	0	0	0	0	chr1	+	134467651	134467868	0	1
Kdm5b	e1.0	1	372	1.11564	0.598311	chr1:134560171-134635285	lysine (K)-specific demethylase 5B	ENSMUSG00000042207	0	0	1	0	0	0	0	0	0	chr1	+	134560171	134560542	0	0
Kdm5b	e2.0	24984	25061	1.08456	0.593864	chr1:134560171-134635285	lysine (K)-specific demethylase 5B	ENSMUSG00000042207	0	0	1	0	0	0	0	0	0	chr1	+	134585154	134585231	0	1
Kdm5b	e3.0	27752	27874	-1.14549	0.549582	chr1:134560171-134635285	lysine (K)-specific demethylase 5B	ENSMUSG00000042207	0	0	1	0	0	0	0	0	0	chr1	+	134587922	134588044	0	1
Kdm5b	e4.0	28607	28777	-1.00893	0.964937	chr1:134560171-134635285	lysine (K)-specific demethylase 5B	ENSMUSG00000042207	0	0	1	0	0	0	0	0	0	chr1	+	134588777	134588947	0	1
Kdm5b	e6.0	35630	35726	1.01887	0.880907	chr1:134560171-134635285	lysine (K)-specific demethylase 5B	ENSMUSG00000042207	1	0	1	0	0	0	0	0	0	chr1	+	134595800	134595896	0	0
Kdm5b	e7.0	37413	37522	-1.10092	0.640284	chr1:134560171-134635285	lysine (K)-specific demethylase 5B	ENSMUSG00000042207	1	0	1	0	0	0	0	0	0	chr1	+	134597583	134597692	0	0
Kdm5b	e8.0	38890	39048	-1.12885	0.622488	chr1:134560171-134635285	lysine (K)-specific demethylase 5B	ENSMUSG00000042207	1	0	1	0	0	0	0	0	0	chr1	+	134599060	134599218	0	0
Kdm5b	e9.0	40464	40583	-1.23346	0.535324	chr1:134560171-134635285	lysine (K)-specific demethylase 5B	ENSMUSG00000042207	1	0	1	0	0	0	0	0	0	chr1	+	134600634	134600753	0	0
Kdm5b	e10.0	42280	42438	-1.12818	0.674281	chr1:134560171-134635285	lysine (K)-specific demethylase 5B	ENSMUSG00000042207	1	0	1	0	0	0	0	0	0	chr1	+	134602450	134602608	0	0
Kdm5b	e11.0	44272	44453	1.02666	0.748814	chr1:134560171-134635285	lysine (K)-specific demethylase 5B	ENSMUSG00000042207	1	0	1	0	0	0	0	0	0	chr1	+	134604442	134604623	0	0
Kdm5b	e12.0	45543	45705	1.07634	0.678164	chr1:134560171-134635285	lysine (K)-specific demethylase 5B	ENSMUSG00000042207	1	0	1	0	0	0	0	0	0	chr1	+	134605713	134605875	0	0
Kdm5b	e13.0	47518	47637	-1.00219	0.986007	chr1:134560171-134635285	lysine (K)-specific demethylase 5B	ENSMUSG00000042207	1	0	1	0	0	0	0	0	0	chr1	+	134607688	134607807	0	0
Kdm5b	e14.0	48695	48889	1.01581	0.918864	chr1:134560171-134635285	lysine (K)-specific demethylase 5B	ENSMUSG00000042207	1	0	1	0	0	0	0	0	0	chr1	+	134608865	134609059	0	0
Kdm5b	e15.0	53018	53199	-1.24438	0.0457023	chr1:134560171-134635285	lysine (K)-specific demethylase 5B	ENSMUSG00000042207	1	0	1	0	0	0	0	0	0	chr1	+	134613188	134613369	0	0
Kdm5b	e16.0	53717	53841	-1.34487	0.0492551	chr1:134560171-134635285	lysine (K)-specific demethylase 5B	ENSMUSG00000042207	1	0	1	0	0	0	0	0	0	chr1	+	134613887	134614011	0	0
Kdm5b	e17.0	55748	55898	-1.11066	0.531394	chr1:134560171-134635285	lysine (K)-specific demethylase 5B	ENSMUSG00000042207	1	0	1	0	0	0	0	0	0	chr1	+	134615918	134616068	0	0
Kdm5b	e18.0	56019	56133	-1.26151	0.170098	chr1:134560171-134635285	lysine (K)-specific demethylase 5B	ENSMUSG00000042207	1	0	1	0	0	0	0	0	0	chr1	+	134616189	134616303	0	0
Kdm5b	e19.0	57522	57877	1.00361	0.968029	chr1:134560171-134635285	lysine (K)-specific demethylase 5B	ENSMUSG00000042207	1	0	1	0	0	0	0	0	0	chr1	+	134617692	134618047	0	0
Kdm5b	e20.0	59390	59528	1.04335	0.771793	chr1:134560171-134635285	lysine (K)-specific demethylase 5B	ENSMUSG00000042207	1	0	1	0	0	0	0	0	0	chr1	+	134619560	134619698	0	0
Kdm5b	e21.0	60673	60852	1.07955	0.524981	chr1:134560171-134635285	lysine (K)-specific demethylase 5B	ENSMUSG00000042207	1	0	1	0	0	0	0	0	0	chr1	+	134620843	134621022	0	0
Kdm5b	e22.0	61765	61923	-1.19906	0.298614	chr1:134560171-134635285	lysine (K)-specific demethylase 5B	ENSMUSG00000042207	1	0	1	0	0	0	0	0	0	chr1	+	134621935	134622093	0	0
Arl8a	e1.0	1	267	-1.00335	0.923093	chr1:135146834-135156268	ADP-ribosylation factor-like 8A	ENSMUSG00000026426	0	0	1	0	0	0	0	0	0	chr1	+	135146834	135147100	0	0
Csrp1	e2.0	9107	9214	1.02111	0.858723	chr1:135720061-135752230	cysteine and glycine-rich protein 1	---	0	0	1	0	0	0	0	0	0	chr1	+	135729167	135729274	0	0
Tmem9	e2.0	9783	9844	-1.1957	0.280287	chr1:136008219-136035030	transmembrane protein 9	---	0	0	1	0	0	0	0	0	0	chr1	+	136018001	136018062	0	0
Tmem9	e3.0	9938	10030	-1.39798	0.539197	chr1:136008219-136035030	transmembrane protein 9	---	0	0	1	0	0	0	0	0	0	chr1	+	136018156	136018248	0	0
Dennd1b	e2.0	2458	2522	-1.00373	0.993684	chr1:138963709-139178960	DENN/MADD domain containing 1B	---	0	0	1	0	0	0	0	0	0	chr1	+	138966166	138966230	0	0
Dennd1b	e4.0	59397	59440	1.07151	0.842909	chr1:138963709-139178960	DENN/MADD domain containing 1B	---	0	0	1	0	0	0	0	0	0	chr1	+	139023105	139023148	0	0
Dennd1b	e5.0	76292	76341	-1.1682	0.181032	chr1:138963709-139178960	DENN/MADD domain containing 1B	---	0	0	1	0	0	0	0	0	0	chr1	+	139040000	139040049	0	0
Dennd1b	e6.0	78216	78335	-1.01759	0.95617	chr1:138963709-139178960	DENN/MADD domain containing 1B	---	0	0	1	0	0	0	0	0	0	chr1	+	139041924	139042043	0	0
Dennd1b	e7.0	89638	89707	-1.06431	0.870561	chr1:138963709-139178960	DENN/MADD domain containing 1B	---	0	0	1	0	0	0	0	0	0	chr1	+	139053346	139053415	0	0
Dennd1b	e8.0	90833	90913	1.14248	0.529885	chr1:138963709-139178960	DENN/MADD domain containing 1B	---	0	0	1	0	0	0	0	0	0	chr1	+	139054541	139054621	0	0
Dennd1b	e10.0	96567	96620	1.39851	0.250537	chr1:138963709-139178960	DENN/MADD domain containing 1B	---	1	0	1	0	0	0	0	0	0	chr1	+	139060275	139060328	0	0
Dennd1b	e11.0	99153	99263	-1.19769	0.538052	chr1:138963709-139178960	DENN/MADD domain containing 1B	---	1	0	1	0	0	0	0	0	0	chr1	+	139062861	139062971	0	0
Dennd1b	e12.0	117465	117565	1.7088	0.101554	chr1:138963709-139178960	DENN/MADD domain containing 1B	---	1	0	1	0	0	0	0	0	0	chr1	+	139081173	139081273	0	0
Dennd1b	e13.0	122175	122220	1.07247	0.793209	chr1:138963709-139178960	DENN/MADD domain containing 1B	---	1	0	1	0	0	0	0	0	0	chr1	+	139085883	139085928	0	0
Dennd1b	e14.0	126746	126847	1.2972	0.520384	chr1:138963709-139178960	DENN/MADD domain containing 1B	---	1	0	1	0	0	0	0	0	0	chr1	+	139090454	139090555	0	0
Dennd1b	e16.0	138260	138385	1.35377	0.133176	chr1:138963709-139178960	DENN/MADD domain containing 1B	---	1	0	1	0	0	0	0	0	0	chr1	+	139101968	139102093	0	0
Dennd1b	e17.0	146676	146777	-1.13999	0.714178	chr1:138963709-139178960	DENN/MADD domain containing 1B	---	1	0	1	0	0	0	0	0	0	chr1	+	139110384	139110485	0	0
Glrx2	e9.0	25311	25374	1.18123	0.074846	chr1:143716338-143749678	glutaredoxin 2 (thioltransferase)	---	0	0	1	0	0	0	0	0	0	chr1	+	143741648	143741711	0	2
Brinp3	e2.0	2930	2983	1.25564	0.665945	chr1:146494758-146902472	bone morphogenetic protein/retinoic acid inducible neural specific 3	---	0	0	1	0	0	0	0	0	0	chr1	+	146497687	146497740	0	0
Rgs8	e2.0	12238	12502	-1.93966	0.08768	chr1:153653037-153697667	regulator of G-protein signaling 8	---	0	0	1	0	0	0	0	0	0	chr1	+	153665274	153665538	0	0
Glul	e1.0	1	131	1.09377	0.117839	chr1:153899929-153909721	glutamate-ammonia ligase (glutamine synthetase)	ENSMUSG00000026473	0	0	1	0	0	0	0	0	0	chr1	+	153899929	153900059	0	0
Stx6	e1.0	1	225	1.07254	0.606861	chr1:155158703-155208256	syntaxin 6	---	0	0	1	0	0	0	0	0	0	chr1	+	155158703	155158927	0	0
Stx6	e2.0	15284	15458	1.06192	0.479383	chr1:155158703-155208256	syntaxin 6	---	0	0	1	0	0	0	0	0	0	chr1	+	155173986	155174160	0	1
Stx6	e3.0	19158	19246	-1.01398	0.839096	chr1:155158703-155208256	syntaxin 6	---	0	0	1	0	0	0	0	0	0	chr1	+	155177860	155177948	0	1
Tor1aip2	e1.0	1	519	1.07201	0.747627	chr1:156035402-156068861	torsin A interacting protein 2	---	0	0	1	0	0	0	0	0	0	chr1	+	156035402	156035920	0	0
Tor1aip2	e3.0	5439	5601	-1.00049	0.995726	chr1:156035402-156068861	torsin A interacting protein 2	---	0	0	1	0	0	0	0	0	0	chr1	+	156040840	156041002	0	0
Tor1aip2	e4.0	5674	5733	1.09809	0.551701	chr1:156035402-156068861	torsin A interacting protein 2	---	1	0	1	0	0	1	0	0	0	chr1	+	156041075	156041134	0	0
Cop1	e3.0	12390	12487	1.01172	0.9677	chr1:159232200-159354872	COP1, E3 ubiquitin ligase	ENSMUSG00000040782	0	0	1	0	0	0	0	0	0	chr1	+	159244589	159244686	0	0
Cop1	e5.0	17824	17943	-1.02579	0.834647	chr1:159232200-159354872	COP1, E3 ubiquitin ligase	ENSMUSG00000040782	0	0	1	0	0	0	0	0	0	chr1	+	159250023	159250142	0	0
Cop1	e6.0	20349	20417	1.03103	0.82878	chr1:159232200-159354872	COP1, E3 ubiquitin ligase	ENSMUSG00000040782	0	0	1	0	0	0	0	0	0	chr1	+	159252548	159252616	0	0
Cop1	e7.0	34558	34617	1.01771	0.876815	chr1:159232200-159354872	COP1, E3 ubiquitin ligase	ENSMUSG00000040782	0	0	1	0	0	0	0	0	0	chr1	+	159266757	159266816	0	1
Cop1	e8.0	35910	35986	-1.09667	0.648854	chr1:159232200-159354872	COP1, E3 ubiquitin ligase	ENSMUSG00000040782	0	0	1	0	0	0	0	0	0	chr1	+	159268109	159268185	0	1
Cop1	e10.0	45890	45947	-1.1099	0.607964	chr1:159232200-159354872	COP1, E3 ubiquitin ligase	ENSMUSG00000040782	1	0	1	0	0	0	0	0	0	chr1	+	159278089	159278146	0	0
Cop1	e11.0	52349	52463	-1.16142	0.289418	chr1:159232200-159354872	COP1, E3 ubiquitin ligase	ENSMUSG00000040782	1	0	1	0	0	0	0	0	0	chr1	+	159284548	159284662	0	0
Gas5	e2.0	563	594	-1.04353	0.619818	chr1:161034601-161038539	growth arrest specific 5	ENSMUSG00000053332	0	0	1	0	0	0	0	0	0	chr1	+	161035163	161035194	0	0
Vamp4	e1.0	1	266	-1.03772	0.780109	chr1:162570515-162599082	vesicle-associated membrane protein 4	---	0	0	1	0	0	0	0	0	0	chr1	+	162570515	162570780	0	0
Scyl3	e3.0	4382	4596	-1.21317	0.292246	chr1:163929098-163955126	SCY1-like 3 (S. cerevisiae)	---	0	0	1	0	0	0	0	0	0	chr1	+	163933479	163933693	0	1
Scyl3	e5.0	7321	7434	-1.17829	0.427455	chr1:163929098-163955126	SCY1-like 3 (S. cerevisiae)	---	0	0	1	0	0	0	0	0	0	chr1	+	163936418	163936531	0	1
Scyl3	e6.0	9643	9699	1.10088	0.653947	chr1:163929098-163955126	SCY1-like 3 (S. cerevisiae)	---	0	0	1	0	0	0	0	0	0	chr1	+	163938740	163938796	0	1
Scyl3	e7.0	10784	10886	-1.02147	0.856447	chr1:163929098-163955126	SCY1-like 3 (S. cerevisiae)	---	0	0	1	0	0	0	0	0	0	chr1	+	163939881	163939983	0	1
Scyl3	e8.0	12010	12121	1.44537	0.0762421	chr1:163929098-163955126	SCY1-like 3 (S. cerevisiae)	---	0	0	1	0	0	0	0	0	0	chr1	+	163941107	163941218	0	1
Scyl3	e9.0	14727	14804	1.57643	0.0621582	chr1:163929098-163955126	SCY1-like 3 (S. cerevisiae)	---	0	0	1	0	0	0	0	0	0	chr1	+	163943824	163943901	0	2
Scyl3	e10.0	15699	15838	-1.5104	0.0155886	chr1:163929098-163955126	SCY1-like 3 (S. cerevisiae)	---	0	0	1	0	0	0	0	0	0	chr1	+	163944796	163944935	0	2
Scyl3	e12.0	20045	20216	1.27445	0.0800316	chr1:163929098-163955126	SCY1-like 3 (S. cerevisiae)	---	0	0	1	0	0	0	0	0	0	chr1	+	163949142	163949313	0	1
Scyl3	e13.0	21471	21629	-1.01128	0.914503	chr1:163929098-163955126	SCY1-like 3 (S. cerevisiae)	---	0	0	1	0	0	0	0	0	0	chr1	+	163950568	163950726	0	1
Nme7	e3.0	3941	4131	-1.1076	0.528815	chr1:164304120-164437725	NME/NM23 family member 7	---	0	0	1	0	0	0	0	0	0	chr1	+	164308060	164308250	0	2
Nme7	e6.0	24174	24281	-1.09325	0.376595	chr1:164304120-164437725	NME/NM23 family member 7	---	0	0	1	0	0	0	0	0	0	chr1	+	164328293	164328400	0	2
Nme7	e7.0	28493	28659	1.05788	0.334458	chr1:164304120-164437725	NME/NM23 family member 7	---	0	0	1	0	0	0	0	0	0	chr1	+	164332612	164332778	0	2
Nme7	e8.0	36610	36720	1.09291	0.431805	chr1:164304120-164437725	NME/NM23 family member 7	---	1	0	1	0	0	0	0	0	0	chr1	+	164340729	164340839	0	2
Nme7	e9.0	39095	39145	1.20796	0.221731	chr1:164304120-164437725	NME/NM23 family member 7	---	1	0	1	0	0	0	0	0	0	chr1	+	164343214	164343264	0	2
Nme7	e10.0	41100	41307	1.01393	0.888205	chr1:164304120-164437725	NME/NM23 family member 7	---	1	0	1	0	0	0	0	0	0	chr1	+	164345219	164345426	0	2
Nme7	e11.0	43655	43760	-1.07556	0.539264	chr1:164304120-164437725	NME/NM23 family member 7	---	1	0	1	0	0	0	0	0	0	chr1	+	164347774	164347879	0	2
Apoa2	e1.0	1	415	1.24532	0.406828	chr1:171221564-171226379	apolipoprotein A-II	---	0	0	1	0	0	0	0	0	0	chr1	+	171221564	171221978	0	0
B4galt3	e1.0	1	87	1.10384	0.366003	chr1:171270328-171276896	UDP-Gal:betaGlcNAc beta 1,4-galactosyltransferase, polypeptide 3	ENSMUSG00000052423	0	0	1	0	0	0	0	0	0	chr1	+	171270328	171270414	0	0
B4galt3	e3.0	876	1046	1.02506	0.713215	chr1:171270328-171276896	UDP-Gal:betaGlcNAc beta 1,4-galactosyltransferase, polypeptide 3	ENSMUSG00000052423	0	0	1	0	0	0	0	0	0	chr1	+	171271203	171271373	0	1
B4galt3	e5.0	2194	2429	1.00003	0.999684	chr1:171270328-171276896	UDP-Gal:betaGlcNAc beta 1,4-galactosyltransferase, polypeptide 3	ENSMUSG00000052423	0	0	1	0	0	0	0	0	0	chr1	+	171272521	171272756	0	1
Dedd	e2.0	338	719	1.01407	0.845559	chr1:171328808-171342501	death effector domain-containing	---	0	0	1	0	0	0	0	0	0	chr1	+	171329145	171329526	0	0
Dedd	e3.0	762	885	1.01796	0.956398	chr1:171328808-171342501	death effector domain-containing	---	0	0	1	0	0	0	0	0	0	chr1	+	171329569	171329692	0	0
Pfdn2	e2.0	722	833	-1.11423	0.599018	chr1:171344954-171359254	prefoldin 2	---	0	0	1	0	0	0	0	0	0	chr1	+	171345675	171345786	0	0
Usf1	e1.0	1	128	-1.02959	0.634796	chr1:171411313-171418758	upstream transcription factor 1	---	0	0	1	0	0	0	0	0	0	chr1	+	171411313	171411440	0	0
Copa	e1.0	1	421	-1.0097	0.892728	chr1:172082529-172122332	coatomer protein complex subunit alpha	ENSMUSG00000026553	0	0	1	0	0	0	0	0	0	chr1	+	172082529	172082949	0	0
Copa	e2.0	5024	5137	-1.10367	0.233839	chr1:172082529-172122332	coatomer protein complex subunit alpha	ENSMUSG00000026553	0	0	1	0	0	0	0	0	0	chr1	+	172087552	172087665	0	0
Copa	e3.0	6569	6642	-1.0722	0.495134	chr1:172082529-172122332	coatomer protein complex subunit alpha	ENSMUSG00000026553	0	0	1	0	0	0	0	0	0	chr1	+	172089097	172089170	0	0
Copa	e4.0	8411	8491	-1.08461	0.084419	chr1:172082529-172122332	coatomer protein complex subunit alpha	ENSMUSG00000026553	0	0	1	0	0	0	0	0	0	chr1	+	172090939	172091019	0	0
Copa	e5.0	8636	8712	-1.03548	0.39776	chr1:172082529-172122332	coatomer protein complex subunit alpha	ENSMUSG00000026553	0	0	1	0	0	0	0	0	0	chr1	+	172091164	172091240	0	0
Copa	e6.0	9717	9826	-1.02497	0.650708	chr1:172082529-172122332	coatomer protein complex subunit alpha	ENSMUSG00000026553	0	0	1	0	0	0	0	0	0	chr1	+	172092245	172092354	0	0
Copa	e7.0	15146	15255	-1.03376	0.476557	chr1:172082529-172122332	coatomer protein complex subunit alpha	ENSMUSG00000026553	1	0	1	0	0	0	0	0	0	chr1	+	172097674	172097783	0	0
Copa	e8.0	17140	17239	1.01878	0.834011	chr1:172082529-172122332	coatomer protein complex subunit alpha	ENSMUSG00000026553	1	0	1	0	0	0	0	0	0	chr1	+	172099668	172099767	0	0
Copa	e9.0	18851	18986	-1.1261	0.137129	chr1:172082529-172122332	coatomer protein complex subunit alpha	ENSMUSG00000026553	1	0	1	0	0	0	0	0	0	chr1	+	172101379	172101514	0	0
Copa	e10.0	19682	19764	-1.05623	0.36692	chr1:172082529-172122332	coatomer protein complex subunit alpha	ENSMUSG00000026553	1	0	1	0	0	0	0	0	0	chr1	+	172102210	172102292	0	0
Copa	e11.0	21581	21731	1.01319	0.86638	chr1:172082529-172122332	coatomer protein complex subunit alpha	ENSMUSG00000026553	1	0	1	0	0	0	0	0	0	chr1	+	172104109	172104259	0	0
Copa	e12.0	22658	22724	1.07607	0.272692	chr1:172082529-172122332	coatomer protein complex subunit alpha	ENSMUSG00000026553	1	0	1	0	0	0	0	0	0	chr1	+	172105186	172105252	0	0
Copa	e13.0	23589	23664	1.04397	0.498525	chr1:172082529-172122332	coatomer protein complex subunit alpha	ENSMUSG00000026553	1	0	1	0	0	0	0	0	0	chr1	+	172106117	172106192	0	0
Copa	e14.0	25784	25866	-1.02606	0.670429	chr1:172082529-172122332	coatomer protein complex subunit alpha	ENSMUSG00000026553	1	0	1	0	0	0	0	0	0	chr1	+	172108312	172108394	0	0
Copa	e15.0	27258	27397	-1.02449	0.71766	chr1:172082529-172122332	coatomer protein complex subunit alpha	ENSMUSG00000026553	1	0	1	0	0	0	0	0	0	chr1	+	172109786	172109925	0	0
Copa	e16.0	27961	28046	1.00319	0.93763	chr1:172082529-172122332	coatomer protein complex subunit alpha	ENSMUSG00000026553	1	0	1	0	0	0	0	0	0	chr1	+	172110489	172110574	0	0
Copa	e17.0	28149	28287	-1.07383	0.200574	chr1:172082529-172122332	coatomer protein complex subunit alpha	ENSMUSG00000026553	1	0	1	0	0	0	0	0	0	chr1	+	172110677	172110815	0	0
Copa	e18.0	29337	29499	-1.0131	0.807678	chr1:172082529-172122332	coatomer protein complex subunit alpha	ENSMUSG00000026553	1	0	1	0	0	0	0	0	0	chr1	+	172111865	172112027	0	0
Copa	e19.0	29596	29742	-1.03683	0.412567	chr1:172082529-172122332	coatomer protein complex subunit alpha	ENSMUSG00000026553	1	0	1	0	0	0	0	0	0	chr1	+	172112124	172112270	0	0
Copa	e20.0	30498	30687	1.01491	0.67175	chr1:172082529-172122332	coatomer protein complex subunit alpha	ENSMUSG00000026553	1	0	1	0	0	0	0	0	0	chr1	+	172113026	172113215	0	0
Copa	e21.0	30806	30901	1.00743	0.910627	chr1:172082529-172122332	coatomer protein complex subunit alpha	ENSMUSG00000026553	1	0	1	0	0	0	0	0	0	chr1	+	172113334	172113429	0	0
Dcaf8	e1.0	1	154	1.02663	0.78376	chr1:172148015-172197326	DDB1 and CUL4 associated factor 8	---	0	0	1	0	0	0	0	0	0	chr1	+	172148015	172148168	0	0
Dcaf8	e3.0	1235	1307	-1.02133	0.765213	chr1:172148015-172197326	DDB1 and CUL4 associated factor 8	---	0	0	1	0	0	0	0	0	0	chr1	+	172149249	172149321	0	1
Dcaf8	e4.0	17834	17904	-1.07701	0.291658	chr1:172148015-172197326	DDB1 and CUL4 associated factor 8	---	0	0	1	0	0	0	0	0	0	chr1	+	172165848	172165918	0	1
Dcaf8	e5.0	24315	24967	-1.02286	0.369331	chr1:172148015-172197326	DDB1 and CUL4 associated factor 8	---	0	0	1	0	0	0	0	0	0	chr1	+	172172329	172172981	0	1
Dcaf8	e6.0	25929	26069	1.04862	0.262207	chr1:172148015-172197326	DDB1 and CUL4 associated factor 8	---	1	0	1	0	0	0	0	0	0	chr1	+	172173943	172174083	0	1
Dcaf8	e7.0	27469	27563	1.02211	0.716921	chr1:172148015-172197326	DDB1 and CUL4 associated factor 8	---	1	0	1	0	0	0	0	0	0	chr1	+	172175483	172175577	0	1
Igsf8	e4.0	50737	50963	-1.01495	0.903668	chr1:172261631-172319848	immunoglobulin superfamily, member 8	ENSMUSG00000038034	0	0	1	0	0	0	0	0	0	chr1	+	172312367	172312593	0	0
Zbtb18	e1.0	1	245	1.16196	0.634498	chr1:177442351-177450764	zinc finger and BTB domain containing 18	---	0	0	1	0	0	0	0	0	0	chr1	+	177442351	177442595	0	0
Zbtb18	e4.0	2389	2472	-2.13211	0.182019	chr1:177442351-177450764	zinc finger and BTB domain containing 18	---	0	0	1	0	0	1	0	0	1	chr1	+	177444739	177444822	0	0
Cox20	e1.0	1	56	-1.03967	0.704797	chr1:178319153-178322693	cytochrome c oxidase assembly protein 20	ENSMUSG00000026500	0	0	1	0	0	0	0	0	0	chr1	+	178319153	178319208	0	0
---	e1.0	1	701	-1.00587	0.936049	chr1:178934425-178939199	---	---	0	0	1	0	0	0	0	0	0	chr1	+	178934425	178935125	0	0
Sccpdh	e1.0	1	338	-1.11675	0.558307	chr1:179668208-179687188	saccharopine dehydrogenase (putative)	ENSMUSG00000038936	0	0	1	0	0	0	0	0	0	chr1	+	179668208	179668545	0	0
Sccpdh	e2.0	2376	2488	-1.0123	0.78174	chr1:179668208-179687188	saccharopine dehydrogenase (putative)	ENSMUSG00000038936	0	0	1	0	0	0	0	0	0	chr1	+	179670583	179670695	0	1
Sccpdh	e3.0	8184	8264	1.02147	0.635916	chr1:179668208-179687188	saccharopine dehydrogenase (putative)	ENSMUSG00000038936	0	0	1	0	0	0	0	0	0	chr1	+	179676391	179676471	0	1
Sccpdh	e4.0	9834	9963	1.03057	0.592723	chr1:179668208-179687188	saccharopine dehydrogenase (putative)	ENSMUSG00000038936	1	0	1	0	0	0	0	0	0	chr1	+	179678041	179678170	0	1
Sccpdh	e5.0	10673	10722	-1.02475	0.506999	chr1:179668208-179687188	saccharopine dehydrogenase (putative)	ENSMUSG00000038936	1	0	1	0	0	0	0	0	0	chr1	+	179678880	179678929	0	1
Sccpdh	e6.0	11378	11508	-1.01232	0.801085	chr1:179668208-179687188	saccharopine dehydrogenase (putative)	ENSMUSG00000038936	1	0	1	0	0	0	0	0	0	chr1	+	179679585	179679715	0	1
Sccpdh	e7.0	12285	12402	-1.03981	0.309362	chr1:179668208-179687188	saccharopine dehydrogenase (putative)	ENSMUSG00000038936	1	0	1	0	0	0	0	0	0	chr1	+	179680492	179680609	0	1
Sccpdh	e8.0	13226	13345	-1.01308	0.811897	chr1:179668208-179687188	saccharopine dehydrogenase (putative)	ENSMUSG00000038936	1	0	1	1	0	0	0	0	0	chr1	+	179681433	179681552	0	1
Sccpdh	e9.0	13444	13500	-1.06946	0.454978	chr1:179668208-179687188	saccharopine dehydrogenase (putative)	ENSMUSG00000038936	1	0	1	1	0	0	0	0	0	chr1	+	179681651	179681707	0	1
Cdc42bpa	e1.0	1	511	-1.26381	0.190554	chr1:179960777-180165603	CDC42 binding protein kinase alpha	---	0	0	1	0	0	0	0	0	0	chr1	+	179960777	179961287	0	1
Cdc42bpa	e6.0	38586	38677	-1.20314	0.117119	chr1:179960777-180165603	CDC42 binding protein kinase alpha	---	0	0	1	0	0	0	0	0	0	chr1	+	179999362	179999453	0	2
Cdc42bpa	e7.0	63869	64026	1.027	0.916252	chr1:179960777-180165603	CDC42 binding protein kinase alpha	---	0	0	1	0	0	1	0	0	0	chr1	+	180024645	180024802	0	0
Cdc42bpa	e8.0	70729	70812	-1.04538	0.643158	chr1:179960777-180165603	CDC42 binding protein kinase alpha	---	0	0	1	0	0	0	0	0	0	chr1	+	180031505	180031588	0	2
Cdc42bpa	e9.0	76053	76148	1.07556	0.470924	chr1:179960777-180165603	CDC42 binding protein kinase alpha	---	0	0	1	0	0	0	0	0	0	chr1	+	180036829	180036924	0	2
Cdc42bpa	e10.0	79276	79424	1.12401	0.406541	chr1:179960777-180165603	CDC42 binding protein kinase alpha	---	1	0	1	0	0	0	0	0	0	chr1	+	180040052	180040200	0	2
Cdc42bpa	e12.0	101014	101107	-1.12401	0.569503	chr1:179960777-180165603	CDC42 binding protein kinase alpha	---	1	0	1	0	0	0	0	0	0	chr1	+	180061790	180061883	0	1
Cdc42bpa	e13.0	104190	104390	-1.28516	0.0989537	chr1:179960777-180165603	CDC42 binding protein kinase alpha	---	1	0	1	0	0	0	0	0	0	chr1	+	180064966	180065166	0	1
Cdc42bpa	e14.0	106375	106623	-1.03277	0.807813	chr1:179960777-180165603	CDC42 binding protein kinase alpha	---	1	0	1	0	0	0	0	0	0	chr1	+	180067151	180067399	0	1
Cdc42bpa	e15.0	108521	108600	1.41424	0.0719396	chr1:179960777-180165603	CDC42 binding protein kinase alpha	---	1	0	1	0	0	0	0	0	0	chr1	+	180069297	180069376	0	1
Cdc42bpa	e16.0	111569	111735	1.14853	0.153324	chr1:179960777-180165603	CDC42 binding protein kinase alpha	---	1	0	1	0	0	0	0	0	0	chr1	+	180072345	180072511	0	1
Cdc42bpa	e17.0	113794	113916	-1.32438	0.0582365	chr1:179960777-180165603	CDC42 binding protein kinase alpha	---	1	0	1	0	0	0	0	0	0	chr1	+	180074570	180074692	0	1
Cdc42bpa	e18.0	123596	123729	-1.18099	0.355399	chr1:179960777-180165603	CDC42 binding protein kinase alpha	---	1	0	1	0	0	0	0	0	0	chr1	+	180084372	180084505	0	1
Cdc42bpa	e19.0	133168	133410	-1.26276	0.0312292	chr1:179960777-180165603	CDC42 binding protein kinase alpha	---	1	0	1	0	0	1	0	0	0	chr1	+	180093944	180094186	0	1
Cdc42bpa	e20.0	133605	133715	-1.3049	0.0509047	chr1:179960777-180165603	CDC42 binding protein kinase alpha	---	1	0	1	0	0	0	0	0	0	chr1	+	180094381	180094491	0	1
Cdc42bpa	e21.0	140249	140496	-1.13928	0.0197287	chr1:179960777-180165603	CDC42 binding protein kinase alpha	---	1	0	1	0	0	0	0	0	0	chr1	+	180101025	180101272	0	1
Cdc42bpa	e22.0	145271	145376	-1.10255	0.251282	chr1:179960777-180165603	CDC42 binding protein kinase alpha	---	1	0	1	0	0	0	0	0	0	chr1	+	180106047	180106152	0	1
Lin9	e4.0	671438	671532	-2.17043	0.130012	chr1:179979305-180690685	lin-9 homolog (C. elegans)	---	0	0	1	0	0	0	0	0	0	chr1	+	180650742	180650836	0	1
Lin9	e5.0	672558	672662	-1.63252	0.159305	chr1:179979305-180690685	lin-9 homolog (C. elegans)	---	0	0	1	0	0	0	0	0	0	chr1	+	180651862	180651966	0	1
Lin9	e7.0	679759	679892	-1.01695	0.933611	chr1:179979305-180690685	lin-9 homolog (C. elegans)	---	0	0	1	0	0	0	0	0	0	chr1	+	180659063	180659196	0	2
Lin9	e8.0	682173	682298	1.46713	0.314231	chr1:179979305-180690685	lin-9 homolog (C. elegans)	---	0	0	1	0	0	0	0	0	0	chr1	+	180661477	180661602	0	2
Lin9	e10.0	688021	688154	-1.00348	0.987276	chr1:179979305-180690685	lin-9 homolog (C. elegans)	---	0	0	1	0	0	0	0	0	0	chr1	+	180667325	180667458	0	2
Lin9	e12.0	689828	689929	1.05242	0.931525	chr1:179979305-180690685	lin-9 homolog (C. elegans)	---	0	0	1	0	0	0	0	0	0	chr1	+	180669132	180669233	0	2
Lin9	e13.0	694760	694840	1.2094	0.682367	chr1:179979305-180690685	lin-9 homolog (C. elegans)	---	0	0	1	0	0	0	0	0	0	chr1	+	180674064	180674144	0	1
Acbd3	e1.0	1	337	1.01284	0.958421	chr1:180726042-180754203	acyl-Coenzyme A binding domain containing 3	ENSMUSG00000026499	0	0	1	0	0	0	0	0	0	chr1	+	180726042	180726378	0	0
Srp9	e1.0	1	239	-1.25617	0.315214	chr1:182124737-182132415	signal recognition particle 9	ENSMUSG00000026511	0	0	1	0	0	0	0	0	0	chr1	+	182124737	182124975	0	0
Trp53bp2	e1.0	1	284	-1.06675	0.833386	chr1:182409167-182462436	transformation related protein 53 binding protein 2	ENSMUSG00000026510	0	0	1	0	0	0	0	0	0	chr1	+	182409167	182409450	0	0
Trp53bp2	e2.0	19728	19875	-1.39349	0.122424	chr1:182409167-182462436	transformation related protein 53 binding protein 2	ENSMUSG00000026510	0	0	1	0	0	0	0	0	0	chr1	+	182428894	182429041	0	0
Trp53bp2	e3.0	22393	22506	-1.37055	0.341549	chr1:182409167-182462436	transformation related protein 53 binding protein 2	ENSMUSG00000026510	0	0	1	0	0	0	0	0	0	chr1	+	182431559	182431672	0	1
Trp53bp2	e4.0	26186	26268	-1.22111	0.531555	chr1:182409167-182462436	transformation related protein 53 binding protein 2	ENSMUSG00000026510	0	0	1	0	0	0	0	0	0	chr1	+	182435352	182435434	0	1
Trp53bp2	e5.0	27732	27833	-1.39174	0.110284	chr1:182409167-182462436	transformation related protein 53 binding protein 2	ENSMUSG00000026510	0	0	1	0	0	0	0	0	0	chr1	+	182436898	182436999	0	1
Trp53bp2	e6.0	31671	31845	-1.04474	0.767317	chr1:182409167-182462436	transformation related protein 53 binding protein 2	ENSMUSG00000026510	0	0	1	0	0	0	0	0	0	chr1	+	182440837	182441011	0	1
Trp53bp2	e7.0	32456	32637	-1.02575	0.781547	chr1:182409167-182462436	transformation related protein 53 binding protein 2	ENSMUSG00000026510	0	0	1	0	0	0	0	0	0	chr1	+	182441622	182441803	0	1
Susd4	e2.0	173	353	-1.10382	0.346854	chr1:182764044-182896580	sushi domain containing 4	---	0	0	1	0	0	0	0	0	0	chr1	+	182764216	182764396	0	0
Rab3gap2	e1.0	1	186	-1.20266	0.4608	chr1:185204168-185286745	RAB3 GTPase activating protein subunit 2	---	0	0	1	0	0	0	0	0	0	chr1	+	185204168	185204353	0	0
Rab3gap2	e2.0	17678	17742	1.08607	0.525845	chr1:185204168-185286745	RAB3 GTPase activating protein subunit 2	---	0	0	1	0	0	0	0	0	0	chr1	+	185221845	185221909	0	0
Rab3gap2	e3.0	28794	28917	-1.23693	0.198422	chr1:185204168-185286745	RAB3 GTPase activating protein subunit 2	---	0	0	1	0	0	0	0	0	0	chr1	+	185232961	185233084	0	0
Rab3gap2	e4.0	29954	30035	-1.14211	0.303888	chr1:185204168-185286745	RAB3 GTPase activating protein subunit 2	---	0	0	1	0	0	0	0	0	0	chr1	+	185234121	185234202	0	0
Rab3gap2	e5.0	31137	31184	-1.14802	0.170652	chr1:185204168-185286745	RAB3 GTPase activating protein subunit 2	---	0	0	1	0	0	0	0	0	0	chr1	+	185235304	185235351	0	0
Rab3gap2	e6.0	31264	31339	-1.18882	0.127285	chr1:185204168-185286745	RAB3 GTPase activating protein subunit 2	---	0	0	1	0	0	0	0	0	0	chr1	+	185235431	185235506	0	0
Rab3gap2	e7.0	31793	31894	-1.3075	0.0357364	chr1:185204168-185286745	RAB3 GTPase activating protein subunit 2	---	0	0	1	0	0	0	0	0	0	chr1	+	185235960	185236061	0	0
Rab3gap2	e8.0	34612	34711	1.03758	0.765298	chr1:185204168-185286745	RAB3 GTPase activating protein subunit 2	---	0	0	1	0	0	0	0	0	0	chr1	+	185238779	185238878	0	0
Rab3gap2	e9.0	36495	36593	-1.0198	0.860977	chr1:185204168-185286745	RAB3 GTPase activating protein subunit 2	---	0	0	1	0	0	0	0	0	0	chr1	+	185240662	185240760	0	0
Rab3gap2	e10.0	42469	42617	-1.25388	0.162431	chr1:185204168-185286745	RAB3 GTPase activating protein subunit 2	---	0	0	1	0	0	0	0	0	0	chr1	+	185246636	185246784	0	0
Rab3gap2	e11.0	43677	43756	-1.18363	0.211793	chr1:185204168-185286745	RAB3 GTPase activating protein subunit 2	---	0	0	1	0	0	0	0	0	0	chr1	+	185247844	185247923	0	0
Rab3gap2	e12.0	43846	43935	-1.07115	0.64006	chr1:185204168-185286745	RAB3 GTPase activating protein subunit 2	---	0	0	1	0	0	0	0	0	0	chr1	+	185248013	185248102	0	0
Rab3gap2	e13.0	45713	45852	-1.05303	0.605509	chr1:185204168-185286745	RAB3 GTPase activating protein subunit 2	---	0	0	1	0	0	0	0	0	0	chr1	+	185249880	185250019	0	0
Rab3gap2	e14.0	46766	46982	-1.07901	0.430023	chr1:185204168-185286745	RAB3 GTPase activating protein subunit 2	---	0	0	1	0	0	0	0	0	0	chr1	+	185250933	185251149	0	0
Rab3gap2	e15.0	47497	47640	-1.05009	0.654681	chr1:185204168-185286745	RAB3 GTPase activating protein subunit 2	---	0	0	1	0	0	0	0	0	0	chr1	+	185251664	185251807	0	1
Rab3gap2	e16.0	47864	47946	1.00331	0.97707	chr1:185204168-185286745	RAB3 GTPase activating protein subunit 2	---	0	0	1	0	0	0	0	0	0	chr1	+	185252031	185252113	0	1
Rab3gap2	e17.0	48149	48213	-1.03099	0.822241	chr1:185204168-185286745	RAB3 GTPase activating protein subunit 2	---	0	0	1	0	0	0	0	0	0	chr1	+	185252316	185252380	0	1
Rab3gap2	e18.0	51578	51668	-1.05522	0.674474	chr1:185204168-185286745	RAB3 GTPase activating protein subunit 2	---	0	0	1	0	0	0	0	0	0	chr1	+	185255745	185255835	0	1
Rab3gap2	e19.0	54331	54458	-1.27668	0.102561	chr1:185204168-185286745	RAB3 GTPase activating protein subunit 2	---	0	0	1	0	0	0	0	0	0	chr1	+	185258498	185258625	0	1
Rab3gap2	e20.0	55147	55360	-1.08606	0.393827	chr1:185204168-185286745	RAB3 GTPase activating protein subunit 2	---	0	0	1	0	0	0	0	0	0	chr1	+	185259314	185259527	0	1
Rab3gap2	e21.0	56234	56331	-1.04824	0.33805	chr1:185204168-185286745	RAB3 GTPase activating protein subunit 2	---	0	0	1	0	0	0	0	0	0	chr1	+	185260401	185260498	0	1
Rab3gap2	e22.0	57163	57268	-1.00697	0.898933	chr1:185204168-185286745	RAB3 GTPase activating protein subunit 2	---	0	0	1	0	0	0	0	0	0	chr1	+	185261330	185261435	0	1
Rab3gap2	e23.0	58512	58672	-1.06077	0.355124	chr1:185204168-185286745	RAB3 GTPase activating protein subunit 2	---	0	0	1	0	0	0	0	0	0	chr1	+	185262679	185262839	0	1
Rab3gap2	e24.0	59464	59692	-1.06332	0.479218	chr1:185204168-185286745	RAB3 GTPase activating protein subunit 2	---	0	0	1	0	0	0	0	0	0	chr1	+	185263631	185263859	0	1
Rab3gap2	e26.0	63006	63112	-1.1219	0.159527	chr1:185204168-185286745	RAB3 GTPase activating protein subunit 2	---	0	0	1	0	0	0	0	0	0	chr1	+	185267173	185267279	0	2
Rab3gap2	e28.0	68405	68475	-1.16774	0.0861327	chr1:185204168-185286745	RAB3 GTPase activating protein subunit 2	---	0	0	1	0	0	0	0	0	0	chr1	+	185272572	185272642	0	2
Rab3gap2	e29.0	71745	71780	-1.1141	0.242254	chr1:185204168-185286745	RAB3 GTPase activating protein subunit 2	---	0	0	1	0	0	0	0	0	0	chr1	+	185275912	185275947	0	2
Rab3gap2	e30.0	72980	73054	-1.02314	0.759497	chr1:185204168-185286745	RAB3 GTPase activating protein subunit 2	---	0	0	1	0	0	0	0	0	0	chr1	+	185277147	185277221	0	2
Rab3gap2	e31.0	73981	74199	1.03386	0.581173	chr1:185204168-185286745	RAB3 GTPase activating protein subunit 2	---	0	0	1	0	0	0	0	0	0	chr1	+	185278148	185278366	0	2
Rab3gap2	e32.0	77484	77573	-1.04389	0.737466	chr1:185204168-185286745	RAB3 GTPase activating protein subunit 2	---	0	0	1	0	0	1	0	0	0	chr1	+	185281651	185281740	0	1
Eprs	e1.0	1	201	-1.24974	0.117778	chr1:185363043-185428360	glutamyl-prolyl-tRNA synthetase	ENSMUSG00000026615	0	0	1	0	0	0	0	0	0	chr1	+	185363043	185363243	0	0
Eprs	e2.0	4489	4573	-1.13714	0.505493	chr1:185363043-185428360	glutamyl-prolyl-tRNA synthetase	ENSMUSG00000026615	0	0	1	0	0	0	0	0	0	chr1	+	185367531	185367615	0	0
Eprs	e3.0	6535	6634	1.02067	0.857883	chr1:185363043-185428360	glutamyl-prolyl-tRNA synthetase	ENSMUSG00000026615	0	0	1	0	0	0	0	0	0	chr1	+	185369577	185369676	0	1
Eprs	e4.0	7847	8003	-1.07419	0.426996	chr1:185363043-185428360	glutamyl-prolyl-tRNA synthetase	ENSMUSG00000026615	0	0	1	0	0	0	0	0	0	chr1	+	185370889	185371045	0	1
Eprs	e5.0	9876	10015	-1.09914	0.58211	chr1:185363043-185428360	glutamyl-prolyl-tRNA synthetase	ENSMUSG00000026615	0	0	1	0	0	0	0	0	0	chr1	+	185372918	185373057	0	1
Eprs	e6.0	11076	11170	-1.23559	0.111168	chr1:185363043-185428360	glutamyl-prolyl-tRNA synthetase	ENSMUSG00000026615	1	0	1	0	0	0	0	0	0	chr1	+	185374118	185374212	0	0
Eprs	e8.0	15733	15859	1.01415	0.951419	chr1:185363043-185428360	glutamyl-prolyl-tRNA synthetase	ENSMUSG00000026615	1	0	1	0	0	0	0	0	0	chr1	+	185378775	185378901	0	0
Eprs	e9.0	16503	16695	-1.17176	0.189114	chr1:185363043-185428360	glutamyl-prolyl-tRNA synthetase	ENSMUSG00000026615	1	0	1	0	0	0	0	0	0	chr1	+	185379545	185379737	0	0
Eprs	e10.0	18758	18929	1.05384	0.644876	chr1:185363043-185428360	glutamyl-prolyl-tRNA synthetase	ENSMUSG00000026615	1	0	1	0	0	0	0	0	0	chr1	+	185381800	185381971	0	0
Eprs	e11.0	21835	22068	1.02712	0.824938	chr1:185363043-185428360	glutamyl-prolyl-tRNA synthetase	ENSMUSG00000026615	1	0	1	0	0	0	0	0	0	chr1	+	185384877	185385110	0	0
Eprs	e12.0	23204	23288	-1.00533	0.978899	chr1:185363043-185428360	glutamyl-prolyl-tRNA synthetase	ENSMUSG00000026615	1	0	1	0	0	0	0	0	0	chr1	+	185386246	185386330	0	1
Eprs	e13.0	24017	24076	-1.13416	0.260984	chr1:185363043-185428360	glutamyl-prolyl-tRNA synthetase	ENSMUSG00000026615	1	0	1	0	0	0	0	0	0	chr1	+	185387059	185387118	0	1
Eprs	e14.0	24315	24335	-1.21898	0.410799	chr1:185363043-185428360	glutamyl-prolyl-tRNA synthetase	ENSMUSG00000026615	1	0	1	0	0	1	0	0	0	chr1	+	185387357	185387377	1	0
Eprs	e15.0	31321	31431	1.06558	0.668688	chr1:185363043-185428360	glutamyl-prolyl-tRNA synthetase	ENSMUSG00000026615	1	0	1	0	0	0	0	0	0	chr1	+	185394363	185394473	0	0
Eprs	e16.0	32988	33124	-1.10797	0.203877	chr1:185363043-185428360	glutamyl-prolyl-tRNA synthetase	ENSMUSG00000026615	1	0	1	0	0	0	0	0	0	chr1	+	185396030	185396166	0	0
Eprs	e17.0	34018	34225	1.09481	0.396807	chr1:185363043-185428360	glutamyl-prolyl-tRNA synthetase	ENSMUSG00000026615	1	0	1	0	0	0	0	0	0	chr1	+	185397060	185397267	0	0
Eprs	e18.0	35352	35464	-1.09813	0.337738	chr1:185363043-185428360	glutamyl-prolyl-tRNA synthetase	ENSMUSG00000026615	1	0	1	0	0	0	0	0	0	chr1	+	185398394	185398506	0	0
Eprs	e19.0	36180	36297	-1.02745	0.795159	chr1:185363043-185428360	glutamyl-prolyl-tRNA synthetase	ENSMUSG00000026615	1	0	1	0	0	0	0	0	0	chr1	+	185399222	185399339	0	0
Eprs	e22.0	44449	44711	1.03326	0.795116	chr1:185363043-185428360	glutamyl-prolyl-tRNA synthetase	ENSMUSG00000026615	1	0	1	0	0	0	0	0	0	chr1	+	185407491	185407753	0	0
Gpatch2	e1.0	1	170	-1.45118	0.297492	chr1:187215507-187351427	G patch domain containing 2	---	0	0	1	0	0	0	0	0	0	chr1	+	187215507	187215676	0	0
Angel2	e5.0	7760	8085	-1.00972	0.889291	chr1:190925108-190946963	angel homolog 2	---	0	0	1	1	0	1	0	0	0	chr1	+	190932867	190933192	0	0
Lpgat1	e1.0	1	183	1.03368	0.910787	chr1:191718023-191784255	lysophosphatidylglycerol acyltransferase 1	---	0	0	1	0	0	0	0	0	0	chr1	+	191718023	191718205	0	0
Rd3	e1.0	1	340	-1.06561	0.739803	chr1:191977370-191988282	retinal degeneration 3	---	0	0	1	0	0	0	0	0	0	chr1	+	191977370	191977709	0	0
Plxna2	e1.0	1	569	-1.58061	0.0638329	chr1:194619829-194816853	plexin A2	ENSMUSG00000026640	0	0	1	0	0	0	0	0	0	chr1	+	194619829	194620397	0	0
Plxna2	e2.0	23858	25119	-1.26101	0.114511	chr1:194619829-194816853	plexin A2	ENSMUSG00000026640	0	0	1	0	0	0	0	0	0	chr1	+	194643686	194644947	0	0
Plxna2	e3.0	29628	29810	-1.12134	0.700324	chr1:194619829-194816853	plexin A2	ENSMUSG00000026640	0	0	1	0	0	0	0	0	0	chr1	+	194649456	194649638	0	0
Plxna2	e5.0	92356	92490	-1.47574	0.430373	chr1:194619829-194816853	plexin A2	ENSMUSG00000026640	1	0	1	0	0	0	0	0	0	chr1	+	194712184	194712318	0	0
Plxna2	e6.0	126302	126402	-1.47166	0.209801	chr1:194619829-194816853	plexin A2	ENSMUSG00000026640	1	0	1	0	0	0	0	0	0	chr1	+	194746130	194746230	0	0
Plxna2	e7.0	129484	129607	-1.35022	0.223449	chr1:194619829-194816853	plexin A2	ENSMUSG00000026640	1	0	1	0	0	0	0	0	0	chr1	+	194749312	194749435	0	0
Plxna2	e8.0	131548	131701	-1.26685	0.363889	chr1:194619829-194816853	plexin A2	ENSMUSG00000026640	1	0	1	0	0	0	0	0	0	chr1	+	194751376	194751529	0	0
Plxna2	e9.0	132225	132321	-1.20684	0.166123	chr1:194619829-194816853	plexin A2	ENSMUSG00000026640	1	0	1	0	0	0	0	0	0	chr1	+	194752053	194752149	0	0
Plxna2	e10.0	134492	134606	-1.6814	0.122594	chr1:194619829-194816853	plexin A2	ENSMUSG00000026640	1	0	1	0	0	0	0	0	0	chr1	+	194754320	194754434	0	0
Plxna2	e11.0	142571	142771	-1.5682	0.152006	chr1:194619829-194816853	plexin A2	ENSMUSG00000026640	1	0	1	0	0	0	0	0	0	chr1	+	194762399	194762599	0	0
Plxna2	e12.0	144654	144750	-1.30768	0.033381	chr1:194619829-194816853	plexin A2	ENSMUSG00000026640	1	0	1	0	0	0	0	0	0	chr1	+	194764482	194764578	0	0
Plxna2	e13.0	147543	147733	-1.08388	0.700232	chr1:194619829-194816853	plexin A2	ENSMUSG00000026640	1	0	1	0	0	0	0	0	0	chr1	+	194767371	194767561	0	0
Plxna2	e14.0	160685	160836	-1.35456	0.0814564	chr1:194619829-194816853	plexin A2	ENSMUSG00000026640	1	0	1	0	0	0	0	0	0	chr1	+	194780513	194780664	0	0
Plxna2	e15.0	166739	166856	-1.29514	0.377604	chr1:194619829-194816853	plexin A2	ENSMUSG00000026640	1	0	1	0	0	0	0	0	0	chr1	+	194786567	194786684	0	0
Plxna2	e16.0	168951	169087	-1.22163	0.556758	chr1:194619829-194816853	plexin A2	ENSMUSG00000026640	1	0	1	0	0	0	0	0	0	chr1	+	194788779	194788915	0	0
Plxna2	e17.0	169893	170060	-1.51143	0.241308	chr1:194619829-194816853	plexin A2	ENSMUSG00000026640	1	0	1	0	0	0	0	0	0	chr1	+	194789721	194789888	0	0
Plxna2	e18.0	170283	170376	-1.32446	0.11135	chr1:194619829-194816853	plexin A2	ENSMUSG00000026640	1	0	1	0	0	0	0	0	0	chr1	+	194790111	194790204	0	0
Plxna2	e19.0	173901	174140	-1.0592	0.795164	chr1:194619829-194816853	plexin A2	ENSMUSG00000026640	1	0	1	0	0	0	0	0	0	chr1	+	194793729	194793968	0	0
Plxna2	e20.0	174545	174688	1.01047	0.94741	chr1:194619829-194816853	plexin A2	ENSMUSG00000026640	1	0	1	0	0	0	0	0	0	chr1	+	194794373	194794516	0	0
Plxna2	e21.0	174995	175229	-1.4114	0.00526136	chr1:194619829-194816853	plexin A2	ENSMUSG00000026640	1	0	1	0	0	0	0	0	0	chr1	+	194794823	194795057	0	0
Plxna2	e22.0	177079	177221	-1.55607	0.0436565	chr1:194619829-194816853	plexin A2	ENSMUSG00000026640	1	0	1	0	0	0	0	0	0	chr1	+	194796907	194797049	0	0
Plxna2	e23.0	177712	177980	-1.11773	0.369066	chr1:194619829-194816853	plexin A2	ENSMUSG00000026640	1	0	1	0	0	0	0	0	0	chr1	+	194797540	194797808	0	0
Plxna2	e24.0	179682	179748	-1.16286	0.4218	chr1:194619829-194816853	plexin A2	ENSMUSG00000026640	1	0	1	0	0	0	0	0	0	chr1	+	194799510	194799576	0	0
Plxna2	e25.0	179947	180093	-1.10006	0.46306	chr1:194619829-194816853	plexin A2	ENSMUSG00000026640	1	0	1	0	0	0	0	0	0	chr1	+	194799775	194799921	0	0
Plxna2	e26.0	180673	180832	-1.21912	0.324085	chr1:194619829-194816853	plexin A2	ENSMUSG00000026640	1	0	1	0	0	0	0	0	0	chr1	+	194800501	194800660	0	0
Plxna2	e27.0	181215	181318	-1.27824	0.117911	chr1:194619829-194816853	plexin A2	ENSMUSG00000026640	1	0	1	0	0	0	0	0	0	chr1	+	194801043	194801146	0	0
Mrpl15	e1.0	1	156	-1.1053	0.520061	chr1:4773202-4785728	mitochondrial ribosomal protein L15	---	0	0	1	0	0	0	0	0	0	chr1	-	4785728	4785573	0	0
Rgs20	e2.0	49249	49548	-1.91492	0.0880525	chr1:4909576-5070285	regulator of G-protein signaling 20	---	0	0	1	0	0	0	0	0	0	chr1	-	5021037	5020738	0	0
Rgs20	e3.0	50747	50975	-1.22506	0.200003	chr1:4909576-5070285	regulator of G-protein signaling 20	---	0	0	1	0	0	0	0	0	0	chr1	-	5019539	5019311	0	0
Rgs20	e4.0	51552	51710	-2.52211	0.231518	chr1:4909576-5070285	regulator of G-protein signaling 20	---	0	0	1	0	0	0	0	0	0	chr1	-	5018734	5018576	0	0
Sntg1	e1.0	1	1747	-1.05386	0.450716	chr1:8359734-9299878	syntrophin, gamma 1	---	0	0	1	0	0	0	0	0	0	chr1	-	9299878	9298132	0	0
Sntg1	e3.0	495907	495962	-1.22742	0.52115	chr1:8359734-9299878	syntrophin, gamma 1	---	0	0	1	0	0	0	0	0	0	chr1	-	8803972	8803917	0	1
Sntg1	e5.0	617850	617906	1.26917	0.213402	chr1:8359734-9299878	syntrophin, gamma 1	---	1	0	1	0	0	0	0	0	0	chr1	-	8682029	8681973	0	2
Sntg1	e6.0	620749	620806	1.39322	0.0560031	chr1:8359734-9299878	syntrophin, gamma 1	---	1	0	1	0	0	0	0	0	0	chr1	-	8679130	8679073	0	2
Sntg1	e8.0	622031	622072	1.13151	0.302354	chr1:8359734-9299878	syntrophin, gamma 1	---	1	0	1	0	0	0	0	0	0	chr1	-	8677848	8677807	0	2
Sntg1	e9.0	674998	675100	-1.01581	0.947222	chr1:8359734-9299878	syntrophin, gamma 1	---	1	0	1	0	0	0	0	0	0	chr1	-	8624881	8624779	0	1
Sntg1	e10.0	692727	692809	1.12693	0.530228	chr1:8359734-9299878	syntrophin, gamma 1	---	1	0	1	0	0	1	0	0	0	chr1	-	8607152	8607070	0	1
Sntg1	e11.0	704337	704467	-1.2709	0.151438	chr1:8359734-9299878	syntrophin, gamma 1	---	1	0	1	0	0	1	0	0	0	chr1	-	8595542	8595412	0	1
Sntg1	e12.0	716545	716674	1.10775	0.668693	chr1:8359734-9299878	syntrophin, gamma 1	---	1	0	1	0	0	0	0	0	0	chr1	-	8583334	8583205	0	1
Sntg1	e13.0	745116	745154	1.26165	0.250984	chr1:8359734-9299878	syntrophin, gamma 1	---	1	0	1	0	0	0	0	0	0	chr1	-	8554763	8554725	0	1
Tram1	e1.0	1	298	-1.04823	0.744311	chr1:13564693-13589897	translocating chain-associating membrane protein 1	ENSMUSG00000025935	0	0	1	0	0	0	0	0	0	chr1	-	13589897	13589600	0	0
Tram1	e2.0	8812	8875	1.01029	0.948447	chr1:13564693-13589897	translocating chain-associating membrane protein 1	ENSMUSG00000025935	0	0	1	0	0	0	0	0	0	chr1	-	13581086	13581023	0	2
Tram1	e3.0	10087	10208	-1.14399	0.155232	chr1:13564693-13589897	translocating chain-associating membrane protein 1	ENSMUSG00000025935	0	0	1	0	0	0	0	0	0	chr1	-	13579811	13579690	0	2
Tram1	e4.0	10332	10448	-1.08685	0.499411	chr1:13564693-13589897	translocating chain-associating membrane protein 1	ENSMUSG00000025935	0	0	1	0	0	0	0	0	0	chr1	-	13579566	13579450	0	2
Tram1	e5.0	11740	11798	1.00876	0.946613	chr1:13564693-13589897	translocating chain-associating membrane protein 1	ENSMUSG00000025935	0	0	1	0	0	0	0	0	0	chr1	-	13578158	13578100	0	2
Stau2	e1.0	1	130	-1.16272	0.539339	chr1:16228810-16519302	staufen double-stranded RNA binding protein 2	---	0	0	1	0	0	0	0	0	0	chr1	-	16519302	16519173	0	0
Stau2	e4.0	2368	2421	-1.31044	0.621154	chr1:16228810-16519302	staufen double-stranded RNA binding protein 2	---	0	0	1	0	0	0	0	0	0	chr1	-	16516935	16516882	0	0
Stau2	e5.0	9895	9961	-1.02464	0.847285	chr1:16228810-16519302	staufen double-stranded RNA binding protein 2	---	0	0	1	0	0	0	0	0	0	chr1	-	16509408	16509342	0	2
Stau2	e6.0	33153	33283	1.23946	0.0470048	chr1:16228810-16519302	staufen double-stranded RNA binding protein 2	---	0	0	1	0	0	1	0	0	0	chr1	-	16486150	16486020	0	0
Stau2	e7.0	56109	56268	-1.03028	0.503305	chr1:16228810-16519302	staufen double-stranded RNA binding protein 2	---	0	0	1	0	0	0	0	0	0	chr1	-	16463194	16463035	0	2
Stau2	e9.0	78845	78980	1.05233	0.509443	chr1:16228810-16519302	staufen double-stranded RNA binding protein 2	---	1	0	1	0	0	0	0	0	0	chr1	-	16440458	16440323	0	2
Stau2	e11.0	125093	125252	1.03238	0.5168	chr1:16228810-16519302	staufen double-stranded RNA binding protein 2	---	1	0	1	0	0	0	0	0	0	chr1	-	16394210	16394051	0	2
Stau2	e12.0	126679	126786	-1.01277	0.80571	chr1:16228810-16519302	staufen double-stranded RNA binding protein 2	---	1	0	1	0	0	0	0	0	0	chr1	-	16392624	16392517	0	2
Stau2	e13.0	129270	129482	1.06764	0.323522	chr1:16228810-16519302	staufen double-stranded RNA binding protein 2	---	1	0	1	0	0	0	0	0	0	chr1	-	16390033	16389821	0	2
Eloc	e1.0	1	128	1.03902	0.782342	chr1:16641726-16657119	elongin C	---	0	0	1	0	0	0	0	0	0	chr1	-	16657119	16656992	0	0
Eloc	e2.0	234	298	1.01358	0.81821	chr1:16641726-16657119	elongin C	---	0	0	1	0	0	0	0	0	0	chr1	-	16656886	16656822	0	0
Ogfrl1	e1.0	1	387	-1.24278	0.427201	chr1:23366424-23383201	opioid growth factor receptor-like 1	ENSMUSG00000026158	0	0	1	0	0	0	0	0	0	chr1	-	23383201	23382815	0	0
Smap1	e1.0	1	344	-1.0142	0.889733	chr1:23844825-23922381	small ArfGAP 1	---	0	0	1	0	0	0	0	0	0	chr1	-	23922381	23922038	0	0
Fam135a	e1.0	1	282	1.14059	0.757115	chr1:24010758-24100342	family with sequence similarity 135, member A	---	0	0	1	0	0	0	0	0	0	chr1	-	24100342	24100061	0	0
Fam135a	e2.0	13732	13823	-1.4544	0.25926	chr1:24010758-24100342	family with sequence similarity 135, member A	---	0	0	1	0	0	0	0	0	0	chr1	-	24086611	24086520	0	0
Fam135a	e3.0	14817	14932	-1.09987	0.659951	chr1:24010758-24100342	family with sequence similarity 135, member A	---	0	0	1	0	0	0	0	0	0	chr1	-	24085526	24085411	0	0
Fam135a	e4.0	32365	32444	1.00396	0.985553	chr1:24010758-24100342	family with sequence similarity 135, member A	---	0	0	1	0	0	0	0	0	0	chr1	-	24067978	24067899	0	0
Fam135a	e5.0	42838	42977	-1.02835	0.92677	chr1:24010758-24100342	family with sequence similarity 135, member A	---	0	0	1	0	0	0	0	0	0	chr1	-	24057505	24057366	0	0
Fam135a	e6.0	43069	43139	-1.57206	0.246258	chr1:24010758-24100342	family with sequence similarity 135, member A	---	0	0	1	0	0	0	0	0	0	chr1	-	24057274	24057204	0	0
Fam135a	e7.0	44426	44599	-1.08559	0.436791	chr1:24010758-24100342	family with sequence similarity 135, member A	---	0	0	1	0	0	0	0	0	0	chr1	-	24055917	24055744	0	0
Fam135a	e8.0	46213	46339	1.10753	0.53378	chr1:24010758-24100342	family with sequence similarity 135, member A	---	0	0	1	0	0	0	0	0	0	chr1	-	24054130	24054004	0	0
Fam135a	e9.0	47007	47160	-1.10771	0.452579	chr1:24010758-24100342	family with sequence similarity 135, member A	---	0	0	1	0	0	0	0	0	0	chr1	-	24053336	24053183	0	0
Fam135a	e10.0	53936	53985	-1.0982	0.595021	chr1:24010758-24100342	family with sequence similarity 135, member A	---	1	0	1	0	0	0	0	0	0	chr1	-	24046407	24046358	0	0
Fam135a	e11.0	56074	56229	1.00107	0.994001	chr1:24010758-24100342	family with sequence similarity 135, member A	---	1	0	1	0	0	0	0	0	0	chr1	-	24044269	24044114	0	0
Fam135a	e12.0	67607	67680	1.33949	0.103102	chr1:24010758-24100342	family with sequence similarity 135, member A	---	1	0	1	0	0	0	0	0	0	chr1	-	24032736	24032663	0	0
Fam135a	e13.0	69447	69601	1.09739	0.707651	chr1:24010758-24100342	family with sequence similarity 135, member A	---	1	0	1	0	0	0	0	0	0	chr1	-	24030896	24030742	0	0
Adgrb3	e1.0	1	246	-1.79515	0.208265	chr1:25067476-25829707	adhesion G protein-coupled receptor B3	---	0	0	1	0	0	0	0	0	0	chr1	-	25829707	25829462	0	0
Adgrb3	e2.0	2933	3704	-1.43391	0.108431	chr1:25067476-25829707	adhesion G protein-coupled receptor B3	---	0	0	1	0	0	0	0	0	0	chr1	-	25826775	25826004	0	0
Adgrb3	e3.0	269843	269953	-1.20627	0.63584	chr1:25067476-25829707	adhesion G protein-coupled receptor B3	---	0	0	1	0	0	0	0	0	0	chr1	-	25559865	25559755	0	0
Adgrb3	e4.0	275872	276033	-1.2974	0.462422	chr1:25067476-25829707	adhesion G protein-coupled receptor B3	---	0	0	1	0	0	0	0	0	0	chr1	-	25553836	25553675	0	0
Adgrb3	e5.0	282128	282292	-1.22439	0.498751	chr1:25067476-25829707	adhesion G protein-coupled receptor B3	---	0	0	1	0	0	0	0	0	0	chr1	-	25547580	25547416	0	0
Adgrb3	e6.0	297069	297233	-2.11322	0.045868	chr1:25067476-25829707	adhesion G protein-coupled receptor B3	---	0	0	1	0	0	0	0	0	0	chr1	-	25532639	25532475	0	0
Adgrb3	e7.0	297674	297838	-3.55336	0.0204408	chr1:25067476-25829707	adhesion G protein-coupled receptor B3	---	0	0	1	0	0	0	0	0	0	chr1	-	25532034	25531870	0	0
Adgrb3	e8.0	324694	324795	-1.31512	0.347454	chr1:25067476-25829707	adhesion G protein-coupled receptor B3	---	0	0	1	0	0	0	0	0	0	chr1	-	25505014	25504913	0	0
Adgrb3	e9.0	325169	325275	-2.03622	0.0480857	chr1:25067476-25829707	adhesion G protein-coupled receptor B3	---	0	0	1	0	0	0	0	0	0	chr1	-	25504539	25504433	0	0
Adgrb3	e10.0	341589	341783	-1.30895	0.558973	chr1:25067476-25829707	adhesion G protein-coupled receptor B3	---	0	0	1	0	0	0	0	0	0	chr1	-	25488119	25487925	0	0
Adgrb3	e12.0	368897	368965	-1.80265	0.0461184	chr1:25067476-25829707	adhesion G protein-coupled receptor B3	---	1	0	1	0	0	0	0	0	0	chr1	-	25460811	25460743	0	0
Adgrb3	e13.0	372608	372716	-1.82766	0.11561	chr1:25067476-25829707	adhesion G protein-coupled receptor B3	---	1	0	1	0	0	0	0	0	0	chr1	-	25457100	25456992	0	0
Adgrb3	e14.0	397132	397281	-1.19606	0.565314	chr1:25067476-25829707	adhesion G protein-coupled receptor B3	---	1	0	1	0	0	0	0	0	0	chr1	-	25432576	25432427	0	0
Adgrb3	e15.0	398210	398285	-1.19395	0.577437	chr1:25067476-25829707	adhesion G protein-coupled receptor B3	---	1	0	1	0	0	0	0	0	0	chr1	-	25431498	25431423	0	0
Adgrb3	e16.0	409048	409150	-1.96582	0.106943	chr1:25067476-25829707	adhesion G protein-coupled receptor B3	---	1	0	1	0	0	0	0	0	0	chr1	-	25420660	25420558	0	0
Adgrb3	e17.0	433229	433272	-2.77493	0.0519596	chr1:25067476-25829707	adhesion G protein-coupled receptor B3	---	1	0	1	0	0	0	0	0	0	chr1	-	25396479	25396436	0	0
Adgrb3	e18.0	600606	601053	1.02649	0.855173	chr1:25067476-25829707	adhesion G protein-coupled receptor B3	---	0	0	1	0	0	0	0	0	0	chr1	-	25229102	25228655	0	0
Phf3	e2.0	10613	10887	1.00162	0.9978	chr1:30802342-30873873	PHD finger protein 3	---	0	0	1	0	0	0	0	0	0	chr1	-	30863261	30862987	0	0
Phf3	e3.0	36608	36769	-1.30767	0.668834	chr1:30802342-30873873	PHD finger protein 3	---	0	0	1	0	0	0	0	0	0	chr1	-	30837266	30837105	0	0
Phf3	e4.0	42315	44031	1.12972	0.0940841	chr1:30802342-30873873	PHD finger protein 3	---	0	0	1	0	0	0	0	0	0	chr1	-	30831559	30829843	0	0
Prim2	e1.0	1	171	-1.08477	0.749785	chr1:33453808-33669794	DNA primase, p58 subunit	ENSMUSG00000026134	0	0	1	0	0	0	0	0	0	chr1	-	33669794	33669624	0	0
Prim2	e2.0	775	937	-1.00339	0.981734	chr1:33453808-33669794	DNA primase, p58 subunit	ENSMUSG00000026134	0	0	1	0	0	0	0	0	0	chr1	-	33669020	33668858	0	2
Prim2	e3.0	2647	2750	-1.12807	0.257136	chr1:33453808-33669794	DNA primase, p58 subunit	ENSMUSG00000026134	0	0	1	0	0	0	0	0	0	chr1	-	33667148	33667045	0	2
Prim2	e4.0	5939	6018	-1.06824	0.650812	chr1:33453808-33669794	DNA primase, p58 subunit	ENSMUSG00000026134	0	0	1	0	0	0	0	0	0	chr1	-	33663856	33663777	0	2
Prim2	e5.0	7429	7549	-1.18258	0.154919	chr1:33453808-33669794	DNA primase, p58 subunit	ENSMUSG00000026134	0	0	1	0	0	0	0	0	0	chr1	-	33662366	33662246	0	2
Prim2	e6.0	39362	39457	-1.14523	0.256566	chr1:33453808-33669794	DNA primase, p58 subunit	ENSMUSG00000026134	0	0	1	0	0	0	0	0	0	chr1	-	33630433	33630338	0	2
Prim2	e7.0	41263	41400	1.16063	0.255059	chr1:33453808-33669794	DNA primase, p58 subunit	ENSMUSG00000026134	0	0	1	0	0	0	0	0	0	chr1	-	33628532	33628395	0	2
Bend6	e1.0	1	226	-1.12203	0.640041	chr1:33852055-33907791	BEN domain containing 6	---	0	0	1	0	0	0	0	0	0	chr1	-	33907791	33907566	0	0
Ccdc115	e1.0	1	445	-1.07331	0.5427	chr1:34436671-34439672	coiled-coil domain containing 115	ENSMUSG00000042111	0	0	1	0	0	0	0	0	0	chr1	-	34439672	34439228	0	0
Ccdc115	e2.0	527	630	-1.1274	0.494762	chr1:34436671-34439672	coiled-coil domain containing 115	ENSMUSG00000042111	0	0	1	0	0	0	0	0	0	chr1	-	34439146	34439043	0	2
Ccdc115	e3.0	741	823	-1.16957	0.424443	chr1:34436671-34439672	coiled-coil domain containing 115	ENSMUSG00000042111	0	0	1	0	0	0	0	0	0	chr1	-	34438932	34438850	0	2
Uggt1	e2.0	9779	9914	-1.65075	0.107361	chr1:36140029-36244720	UDP-glucose glycoprotein glucosyltransferase 1	ENSMUSG00000037470	1	0	1	0	0	0	0	0	0	chr1	-	36234942	36234807	0	0
Uggt1	e3.0	13981	14063	-1.47927	0.278509	chr1:36140029-36244720	UDP-glucose glycoprotein glucosyltransferase 1	ENSMUSG00000037470	1	0	1	0	0	0	0	0	0	chr1	-	36230740	36230658	0	0
Uggt1	e4.0	17107	17237	-1.58399	0.269051	chr1:36140029-36244720	UDP-glucose glycoprotein glucosyltransferase 1	ENSMUSG00000037470	1	0	1	0	0	0	0	0	0	chr1	-	36227614	36227484	0	0
Uggt1	e5.0	23397	23509	-1.11229	0.678688	chr1:36140029-36244720	UDP-glucose glycoprotein glucosyltransferase 1	ENSMUSG00000037470	1	0	1	0	0	0	0	0	0	chr1	-	36221324	36221212	0	0
Uggt1	e6.0	28415	28589	1.14982	0.565814	chr1:36140029-36244720	UDP-glucose glycoprotein glucosyltransferase 1	ENSMUSG00000037470	1	0	1	0	0	0	0	0	0	chr1	-	36216306	36216132	0	0
Uggt1	e8.0	34657	34735	-2.28715	0.12313	chr1:36140029-36244720	UDP-glucose glycoprotein glucosyltransferase 1	ENSMUSG00000037470	1	0	1	0	0	0	0	0	0	chr1	-	36210064	36209986	0	0
Uggt1	e9.0	36679	36779	-1.63994	0.0110266	chr1:36140029-36244720	UDP-glucose glycoprotein glucosyltransferase 1	ENSMUSG00000037470	1	0	1	0	0	0	0	0	0	chr1	-	36208042	36207942	0	0
Uggt1	e10.0	41843	41942	-1.85438	0.0238531	chr1:36140029-36244720	UDP-glucose glycoprotein glucosyltransferase 1	ENSMUSG00000037470	1	0	1	0	0	0	0	0	0	chr1	-	36202878	36202779	0	0
Uggt1	e11.0	42956	43016	-1.14516	0.643982	chr1:36140029-36244720	UDP-glucose glycoprotein glucosyltransferase 1	ENSMUSG00000037470	1	0	1	0	0	0	0	0	0	chr1	-	36201765	36201705	0	0
Uggt1	e12.0	47086	47177	-1.23139	0.418871	chr1:36140029-36244720	UDP-glucose glycoprotein glucosyltransferase 1	ENSMUSG00000037470	1	0	1	0	0	0	0	0	0	chr1	-	36197635	36197544	0	0
Uggt1	e13.0	48721	48871	-1.40721	0.260949	chr1:36140029-36244720	UDP-glucose glycoprotein glucosyltransferase 1	ENSMUSG00000037470	1	0	1	0	0	0	0	0	0	chr1	-	36196000	36195850	0	0
Uggt1	e14.0	52216	52335	-1.68476	0.0694836	chr1:36140029-36244720	UDP-glucose glycoprotein glucosyltransferase 1	ENSMUSG00000037470	1	0	1	0	0	0	0	0	0	chr1	-	36192505	36192386	0	0
Uggt1	e15.0	53107	53192	-1.40065	0.217492	chr1:36140029-36244720	UDP-glucose glycoprotein glucosyltransferase 1	ENSMUSG00000037470	1	0	1	0	0	0	0	0	0	chr1	-	36191614	36191529	0	0
Uggt1	e16.0	58753	58888	-1.16049	0.689106	chr1:36140029-36244720	UDP-glucose glycoprotein glucosyltransferase 1	ENSMUSG00000037470	1	0	1	0	0	0	0	0	0	chr1	-	36185968	36185833	0	0
Uggt1	e17.0	60234	60365	-1.29168	0.0877638	chr1:36140029-36244720	UDP-glucose glycoprotein glucosyltransferase 1	ENSMUSG00000037470	1	0	1	0	0	0	0	0	0	chr1	-	36184487	36184356	0	0
Uggt1	e18.0	62087	62251	-1.22248	0.314021	chr1:36140029-36244720	UDP-glucose glycoprotein glucosyltransferase 1	ENSMUSG00000037470	1	0	1	0	0	0	0	0	0	chr1	-	36182634	36182470	0	0
Uggt1	e19.0	65042	65162	-1.1535	0.429373	chr1:36140029-36244720	UDP-glucose glycoprotein glucosyltransferase 1	ENSMUSG00000037470	1	0	1	0	0	0	0	0	0	chr1	-	36179679	36179559	0	0
Uggt1	e20.0	67105	67203	-1.33221	0.249777	chr1:36140029-36244720	UDP-glucose glycoprotein glucosyltransferase 1	ENSMUSG00000037470	1	0	1	0	0	0	0	0	0	chr1	-	36177616	36177518	0	0
Uggt1	e21.0	67922	67945	-1.03598	0.892643	chr1:36140029-36244720	UDP-glucose glycoprotein glucosyltransferase 1	ENSMUSG00000037470	1	0	1	0	0	1	0	0	0	chr1	-	36176799	36176776	1	0
Uggt1	e22.0	68394	68488	1.03387	0.922625	chr1:36140029-36244720	UDP-glucose glycoprotein glucosyltransferase 1	ENSMUSG00000037470	1	0	1	0	0	0	0	0	0	chr1	-	36176327	36176233	0	0
Uggt1	e23.0	69619	69825	-1.46843	0.00395263	chr1:36140029-36244720	UDP-glucose glycoprotein glucosyltransferase 1	ENSMUSG00000037470	1	0	1	0	0	0	0	0	0	chr1	-	36175102	36174896	0	0
Uggt1	e24.0	70511	70642	-1.18167	0.171577	chr1:36140029-36244720	UDP-glucose glycoprotein glucosyltransferase 1	ENSMUSG00000037470	1	0	1	0	0	0	0	0	0	chr1	-	36174210	36174079	0	0
Uggt1	e25.0	71156	71286	-1.00314	0.981736	chr1:36140029-36244720	UDP-glucose glycoprotein glucosyltransferase 1	ENSMUSG00000037470	1	0	1	0	0	0	0	0	0	chr1	-	36173565	36173435	0	0
Uggt1	e26.0	74427	74522	1.14512	0.436609	chr1:36140029-36244720	UDP-glucose glycoprotein glucosyltransferase 1	ENSMUSG00000037470	1	0	1	0	0	0	0	0	0	chr1	-	36170294	36170199	0	0
Lman2l	e1.0	1	222	-1.15348	0.475947	chr1:36418800-36445271	lectin, mannose-binding 2-like	---	0	0	1	0	0	0	0	0	0	chr1	-	36445271	36445050	0	0
Tmem131	e2.0	50204	50265	-1.28985	0.526283	chr1:36792191-36939528	transmembrane protein 131	ENSMUSG00000026116	0	0	1	0	0	0	0	0	0	chr1	-	36889325	36889264	0	0
Tmem131	e3.0	58155	58195	-1.1954	0.568055	chr1:36792191-36939528	transmembrane protein 131	ENSMUSG00000026116	0	0	1	0	0	0	0	0	0	chr1	-	36881374	36881334	0	0
Tmem131	e4.0	66949	67017	-1.26923	0.417086	chr1:36792191-36939528	transmembrane protein 131	ENSMUSG00000026116	0	0	1	0	0	0	0	0	0	chr1	-	36872580	36872512	0	0
Tmem131	e5.0	84562	84685	-1.5144	0.0939311	chr1:36792191-36939528	transmembrane protein 131	ENSMUSG00000026116	0	0	1	0	0	0	0	0	0	chr1	-	36854967	36854844	0	0
Tmem131	e6.0	97819	97935	-1.27772	0.231331	chr1:36792191-36939528	transmembrane protein 131	ENSMUSG00000026116	0	0	1	0	0	0	0	0	0	chr1	-	36841710	36841594	0	1
Tmem131	e7.0	99018	99140	-1.10721	0.861953	chr1:36792191-36939528	transmembrane protein 131	ENSMUSG00000026116	0	0	1	0	0	0	0	0	0	chr1	-	36840511	36840389	0	1
Tmem131	e8.0	101490	101570	1.0388	0.928411	chr1:36792191-36939528	transmembrane protein 131	ENSMUSG00000026116	0	0	1	0	0	0	0	0	0	chr1	-	36838039	36837959	0	1
Tmem131	e9.0	104617	104767	1.23179	0.322435	chr1:36792191-36939528	transmembrane protein 131	ENSMUSG00000026116	0	0	1	0	0	0	0	0	0	chr1	-	36834912	36834762	0	1
Tmem131	e10.0	104857	104913	1.03752	0.892671	chr1:36792191-36939528	transmembrane protein 131	ENSMUSG00000026116	0	0	1	0	0	0	0	0	0	chr1	-	36834672	36834616	0	1
Tmem131	e11.0	105972	106033	1.14221	0.593218	chr1:36792191-36939528	transmembrane protein 131	ENSMUSG00000026116	0	0	1	0	0	0	0	0	0	chr1	-	36833557	36833496	0	1
Tmem131	e12.0	109855	109963	-1.1268	0.716931	chr1:36792191-36939528	transmembrane protein 131	ENSMUSG00000026116	0	0	1	0	0	0	0	0	0	chr1	-	36829674	36829566	0	1
Tmem131	e13.0	111356	111464	-1.34291	0.325142	chr1:36792191-36939528	transmembrane protein 131	ENSMUSG00000026116	0	0	1	0	0	0	0	0	0	chr1	-	36828173	36828065	0	0
Tmem131	e14.0	112114	112267	1.85315	0.0231433	chr1:36792191-36939528	transmembrane protein 131	ENSMUSG00000026116	0	0	1	0	0	0	0	0	0	chr1	-	36827415	36827262	0	0
Tmem131	e15.0	112348	112518	1.3653	0.35631	chr1:36792191-36939528	transmembrane protein 131	ENSMUSG00000026116	0	0	1	0	0	0	0	0	0	chr1	-	36827181	36827011	0	0
Tmem131	e16.0	113990	114100	-1.05369	0.861593	chr1:36792191-36939528	transmembrane protein 131	ENSMUSG00000026116	0	0	1	0	0	0	0	0	0	chr1	-	36825539	36825429	0	0
Tmem131	e17.0	114183	114317	1.06678	0.803005	chr1:36792191-36939528	transmembrane protein 131	ENSMUSG00000026116	0	0	1	0	0	0	0	0	0	chr1	-	36825346	36825212	0	0
Tmem131	e18.0	114709	114813	1.37035	0.0596806	chr1:36792191-36939528	transmembrane protein 131	ENSMUSG00000026116	0	0	1	0	0	0	0	0	0	chr1	-	36824820	36824716	0	0
Tmem131	e19.0	116376	116462	1.09221	0.656789	chr1:36792191-36939528	transmembrane protein 131	ENSMUSG00000026116	0	0	1	0	0	0	0	0	0	chr1	-	36823153	36823067	0	0
Tmem131	e20.0	120314	120466	1.23265	0.397218	chr1:36792191-36939528	transmembrane protein 131	ENSMUSG00000026116	0	0	1	0	0	0	0	0	0	chr1	-	36819215	36819063	0	0
Tmem131	e21.0	120561	120636	-1.12395	0.584939	chr1:36792191-36939528	transmembrane protein 131	ENSMUSG00000026116	0	0	1	0	0	0	0	0	0	chr1	-	36818968	36818893	0	0
Tmem131	e22.0	120754	120871	1.11477	0.6659	chr1:36792191-36939528	transmembrane protein 131	ENSMUSG00000026116	0	0	1	0	0	0	0	0	0	chr1	-	36818775	36818658	0	0
Mgat4a	e2.0	4613	4978	1.04284	0.837402	chr1:37439340-37541016	mannoside acetylglucosaminyltransferase 4, isoenzyme A	---	0	0	1	0	0	0	0	0	0	chr1	-	37536404	37536039	0	0
Tsga10	e2.0	493	575	-1.12924	0.754182	chr1:37754572-37865300	testis specific 10	---	0	0	1	0	0	0	0	0	0	chr1	-	37864808	37864726	0	0
Tsga10	e3.0	9928	10056	-1.06588	0.732883	chr1:37754572-37865300	testis specific 10	---	0	0	1	0	0	0	0	0	0	chr1	-	37855373	37855245	0	2
Tsga10	e4.0	15855	16070	1.00557	0.981746	chr1:37754572-37865300	testis specific 10	---	0	0	1	0	0	0	0	0	0	chr1	-	37849446	37849231	0	2
Pantr1	e1.0	1	84	-1.10229	0.255993	chr1:42590784-42694830	POU domain, class 3, transcription factor 3 adjacent noncoding transcript 1	ENSMUSG00000060424	0	0	1	0	0	0	0	0	0	chr1	-	42694830	42694747	0	0
Pantr1	e2.0	1735	1890	1.16504	0.0437259	chr1:42590784-42694830	POU domain, class 3, transcription factor 3 adjacent noncoding transcript 1	ENSMUSG00000060424	0	0	1	0	0	0	0	0	0	chr1	-	42693096	42692941	0	0
Tgfbrap1	e1.0	1	368	1.55288	0.193388	chr1:43047200-43098637	transforming growth factor, beta receptor associated protein 1	---	0	0	1	0	0	0	0	0	0	chr1	-	43098637	43098270	0	0
Tgfbrap1	e2.0	1589	1786	1.23094	0.173236	chr1:43047200-43098637	transforming growth factor, beta receptor associated protein 1	---	0	0	1	0	0	0	0	0	0	chr1	-	43097049	43096852	0	0
Tgfbrap1	e4.0	22686	23387	-1.01847	0.747205	chr1:43047200-43098637	transforming growth factor, beta receptor associated protein 1	---	0	0	1	0	0	0	0	0	0	chr1	-	43075952	43075251	0	1
Tgfbrap1	e5.0	26983	27177	-1.05253	0.661388	chr1:43047200-43098637	transforming growth factor, beta receptor associated protein 1	---	1	0	1	0	0	0	0	0	0	chr1	-	43071655	43071461	0	1
Tgfbrap1	e6.0	31010	31164	-1.19033	0.252533	chr1:43047200-43098637	transforming growth factor, beta receptor associated protein 1	---	1	0	1	0	0	0	0	0	0	chr1	-	43067628	43067474	0	1
Tgfbrap1	e7.0	36039	36121	-1.15483	0.0995308	chr1:43047200-43098637	transforming growth factor, beta receptor associated protein 1	---	1	0	1	0	0	0	0	0	0	chr1	-	43062599	43062517	0	1
Fhl2	e2.0	32801	33061	1.18129	0.293237	chr1:43123071-43196762	four and a half LIM domains 2	---	0	0	1	0	0	0	0	0	0	chr1	-	43163962	43163702	0	0
Uxs1	e3.0	20463	20490	1.54099	0.0385689	chr1:43746961-43827839	UDP-glucuronate decarboxylase 1	ENSMUSG00000057363	0	0	1	0	0	0	0	0	0	chr1	-	43807377	43807350	0	2
Uxs1	e4.0	22166	22214	1.64454	0.13425	chr1:43746961-43827839	UDP-glucuronate decarboxylase 1	ENSMUSG00000057363	0	0	1	0	0	0	0	0	0	chr1	-	43805674	43805626	0	2
Uxs1	e8.0	47671	47775	1.03104	0.797114	chr1:43746961-43827839	UDP-glucuronate decarboxylase 1	ENSMUSG00000057363	0	0	1	0	0	0	0	0	0	chr1	-	43780169	43780065	0	2
Uxs1	e9.0	52964	53023	-1.04174	0.654158	chr1:43746961-43827839	UDP-glucuronate decarboxylase 1	ENSMUSG00000057363	0	0	1	0	0	0	0	0	0	chr1	-	43774876	43774817	0	2
Uxs1	e10.0	56038	56159	-1.12493	0.147127	chr1:43746961-43827839	UDP-glucuronate decarboxylase 1	ENSMUSG00000057363	0	0	1	0	0	0	0	0	0	chr1	-	43771802	43771681	0	2
Uxs1	e11.0	62831	62950	1.0092	0.914854	chr1:43746961-43827839	UDP-glucuronate decarboxylase 1	ENSMUSG00000057363	0	0	1	0	0	0	0	0	0	chr1	-	43765009	43764890	0	2
Tex30	e1.0	1	114	-1.54652	0.121853	chr1:44086613-44102441	testis expressed 30	---	0	0	1	0	0	0	0	0	0	chr1	-	44102441	44102328	0	0
Tex30	e2.0	485	542	-1.23111	0.466169	chr1:44086613-44102441	testis expressed 30	---	0	0	1	1	0	1	0	0	0	chr1	-	44101957	44101900	0	2
Slc39a10	e3.0	72159	72306	-1.01129	0.947979	chr1:46806717-46925776	solute carrier family 39 (zinc transporter), member 10	ENSMUSG00000025986	0	0	1	0	0	0	0	0	0	chr1	-	46853618	46853471	0	0
Myo1b	e6.0	81436	81530	1.33685	0.516036	chr1:51749758-51915978	myosin IB	---	1	0	1	0	0	0	0	0	0	chr1	-	51834543	51834449	0	1
Myo1b	e12.0	118444	118591	-1.87996	0.245535	chr1:51749758-51915978	myosin IB	---	1	0	1	0	0	0	0	0	0	chr1	-	51797535	51797388	0	1
Myo1b	e13.0	118862	118980	-1.47876	0.42124	chr1:51749758-51915978	myosin IB	---	1	0	1	0	0	0	0	0	0	chr1	-	51797117	51796999	0	1
Gls	e1.0	1	641	-1.08352	0.503588	chr1:52163449-52233232	glutaminase	---	0	0	1	0	0	0	0	0	0	chr1	-	52233232	52232592	0	0
Gls	e2.0	13194	13290	1.02902	0.509508	chr1:52163449-52233232	glutaminase	---	0	0	1	0	0	0	0	0	0	chr1	-	52220039	52219943	0	0
Gls	e3.0	13624	13745	-1.06954	0.270316	chr1:52163449-52233232	glutaminase	---	0	0	1	0	0	0	0	0	0	chr1	-	52219609	52219488	0	0
Gls	e4.0	17539	17668	-1.0658	0.437435	chr1:52163449-52233232	glutaminase	---	0	0	1	0	0	0	0	0	0	chr1	-	52215694	52215565	0	0
Gls	e6.0	20867	21030	1.01273	0.696128	chr1:52163449-52233232	glutaminase	---	0	0	1	0	0	0	0	0	0	chr1	-	52212366	52212203	0	0
Gls	e7.0	25874	25932	-1.01405	0.885354	chr1:52163449-52233232	glutaminase	---	0	0	1	0	0	0	0	0	0	chr1	-	52207359	52207301	0	1
Nab1	e2.0	9694	10528	1.06256	0.0813541	chr1:52455850-52500448	Ngfi-A binding protein 1	---	0	0	1	0	0	0	0	0	0	chr1	-	52490755	52489921	0	1
Nab1	e3.0	19445	19578	1.07134	0.455986	chr1:52455850-52500448	Ngfi-A binding protein 1	---	0	0	1	0	0	0	0	0	0	chr1	-	52481004	52480871	0	1
Nab1	e4.0	21160	21211	-1.03861	0.712572	chr1:52455850-52500448	Ngfi-A binding protein 1	---	0	0	1	0	0	0	0	0	0	chr1	-	52479289	52479238	0	1
Nab1	e5.0	33470	33559	-1.11831	0.108968	chr1:52455850-52500448	Ngfi-A binding protein 1	---	0	0	1	0	0	0	0	0	0	chr1	-	52466979	52466890	0	1
Nab1	e6.0	35502	35664	-1.1273	0.0592763	chr1:52455850-52500448	Ngfi-A binding protein 1	---	0	0	1	0	0	0	0	0	0	chr1	-	52464947	52464785	0	1
Mfsd6	e2.0	17708	19299	-1.01172	0.560398	chr1:52656286-52727462	major facilitator superfamily domain containing 6	---	0	0	1	0	0	0	0	0	0	chr1	-	52709755	52708164	0	1
Mfsd6	e3.0	50888	50985	1.01108	0.897303	chr1:52656286-52727462	major facilitator superfamily domain containing 6	---	0	0	1	0	0	0	0	0	0	chr1	-	52676575	52676478	0	2
Mfsd6	e4.0	64017	64178	1.0664	0.375689	chr1:52656286-52727462	major facilitator superfamily domain containing 6	---	1	0	1	0	0	0	0	0	0	chr1	-	52663446	52663285	0	1
Mfsd6	e5.0	64975	65073	-1.05562	0.548179	chr1:52656286-52727462	major facilitator superfamily domain containing 6	---	1	0	1	0	0	0	0	0	0	chr1	-	52662488	52662390	0	1
Mfsd6	e6.0	66376	66656	1.03249	0.587444	chr1:52656286-52727462	major facilitator superfamily domain containing 6	---	1	0	1	0	0	0	0	0	0	chr1	-	52661087	52660807	0	1
Hecw2	e2.0	154642	154968	1.24516	0.407477	chr1:53806874-54195168	HECT, C2 and WW domain containing E3 ubiquitin protein ligase 2	---	0	0	1	0	0	0	0	0	0	chr1	-	54040527	54040201	0	1
Hecw2	e3.0	244248	244355	1.23589	0.250037	chr1:53806874-54195168	HECT, C2 and WW domain containing E3 ubiquitin protein ligase 2	---	0	0	1	0	0	0	0	0	0	chr1	-	53950921	53950814	0	2
Hecw2	e4.0	252369	252463	1.1876	0.289026	chr1:53806874-54195168	HECT, C2 and WW domain containing E3 ubiquitin protein ligase 2	---	0	0	1	0	0	0	0	0	0	chr1	-	53942800	53942706	0	2
Hecw2	e5.0	258036	258111	-1.06767	0.840242	chr1:53806874-54195168	HECT, C2 and WW domain containing E3 ubiquitin protein ligase 2	---	1	0	1	0	0	0	0	0	0	chr1	-	53937133	53937058	0	2
Hecw2	e7.0	264060	264199	-1.43599	0.108179	chr1:53806874-54195168	HECT, C2 and WW domain containing E3 ubiquitin protein ligase 2	---	1	0	1	0	0	0	0	0	0	chr1	-	53931109	53930970	0	2
Hecw2	e8.0	268004	268104	-1.74047	0.159565	chr1:53806874-54195168	HECT, C2 and WW domain containing E3 ubiquitin protein ligase 2	---	1	0	1	0	0	0	0	0	0	chr1	-	53927165	53927065	0	0
Hecw2	e9.0	268486	269859	-1.56599	0.131743	chr1:53806874-54195168	HECT, C2 and WW domain containing E3 ubiquitin protein ligase 2	---	1	0	1	0	0	0	0	0	0	chr1	-	53926683	53925310	0	0
Hecw2	e10.0	271175	271270	-2.05271	0.0138803	chr1:53806874-54195168	HECT, C2 and WW domain containing E3 ubiquitin protein ligase 2	---	1	0	1	0	0	0	0	0	0	chr1	-	53923994	53923899	0	0
Hecw2	e11.0	280537	280687	-1.11665	0.569014	chr1:53806874-54195168	HECT, C2 and WW domain containing E3 ubiquitin protein ligase 2	---	1	0	1	0	0	0	0	0	0	chr1	-	53914632	53914482	0	0
Hecw2	e12.0	281299	281402	-1.11143	0.723424	chr1:53806874-54195168	HECT, C2 and WW domain containing E3 ubiquitin protein ligase 2	---	1	0	1	0	0	0	0	0	0	chr1	-	53913870	53913767	0	0
Hecw2	e13.0	281804	281928	-1.33123	0.393777	chr1:53806874-54195168	HECT, C2 and WW domain containing E3 ubiquitin protein ligase 2	---	1	0	1	0	0	0	0	0	0	chr1	-	53913365	53913241	0	0
Hecw2	e14.0	290735	290920	-1.23819	0.589179	chr1:53806874-54195168	HECT, C2 and WW domain containing E3 ubiquitin protein ligase 2	---	1	0	1	0	0	0	0	0	0	chr1	-	53904434	53904249	0	0
Hecw2	e15.0	303909	304043	-1.02281	0.944557	chr1:53806874-54195168	HECT, C2 and WW domain containing E3 ubiquitin protein ligase 2	---	1	0	1	0	0	0	0	0	0	chr1	-	53891260	53891126	0	0
Hecw2	e16.0	307484	307586	-1.05285	0.837659	chr1:53806874-54195168	HECT, C2 and WW domain containing E3 ubiquitin protein ligase 2	---	1	0	1	0	0	0	0	0	0	chr1	-	53887685	53887583	0	0
Hecw2	e17.0	309744	309840	-1.15982	0.514302	chr1:53806874-54195168	HECT, C2 and WW domain containing E3 ubiquitin protein ligase 2	---	1	0	1	0	0	0	0	0	0	chr1	-	53885425	53885329	0	0
Hecw2	e18.0	326250	326333	-1.10773	0.717641	chr1:53806874-54195168	HECT, C2 and WW domain containing E3 ubiquitin protein ligase 2	---	1	0	1	0	0	0	0	0	0	chr1	-	53868919	53868836	0	0
Hecw2	e19.0	330019	330128	-1.15757	0.499166	chr1:53806874-54195168	HECT, C2 and WW domain containing E3 ubiquitin protein ligase 2	---	1	0	1	0	0	0	0	0	0	chr1	-	53865150	53865041	0	0
Hecw2	e20.0	341880	342000	-1.31762	0.271148	chr1:53806874-54195168	HECT, C2 and WW domain containing E3 ubiquitin protein ligase 2	---	1	0	1	0	0	0	0	0	0	chr1	-	53853289	53853169	0	0
Hecw2	e21.0	343483	343596	-1.22903	0.448111	chr1:53806874-54195168	HECT, C2 and WW domain containing E3 ubiquitin protein ligase 2	---	1	0	1	0	0	0	0	0	0	chr1	-	53851686	53851573	0	0
Hecw2	e22.0	354303	354455	-1.10993	0.726824	chr1:53806874-54195168	HECT, C2 and WW domain containing E3 ubiquitin protein ligase 2	---	1	0	1	0	0	0	0	0	0	chr1	-	53840866	53840714	0	0
Hecw2	e23.0	356059	356157	-1.03271	0.923467	chr1:53806874-54195168	HECT, C2 and WW domain containing E3 ubiquitin protein ligase 2	---	1	0	1	0	0	0	0	0	0	chr1	-	53839110	53839012	0	0
Hecw2	e24.0	362418	362547	-1.15391	0.558826	chr1:53806874-54195168	HECT, C2 and WW domain containing E3 ubiquitin protein ligase 2	---	1	0	1	0	0	0	0	0	0	chr1	-	53832751	53832622	0	0
Hecw2	e25.0	363513	363659	-1.53204	0.107962	chr1:53806874-54195168	HECT, C2 and WW domain containing E3 ubiquitin protein ligase 2	---	1	0	1	0	0	0	0	0	0	chr1	-	53831656	53831510	0	0
Hecw2	e26.0	364413	364527	-1.86009	0.0357925	chr1:53806874-54195168	HECT, C2 and WW domain containing E3 ubiquitin protein ligase 2	---	1	0	1	0	0	0	0	0	0	chr1	-	53830756	53830642	0	0
Hecw2	e27.0	367199	367284	-1.19982	0.189174	chr1:53806874-54195168	HECT, C2 and WW domain containing E3 ubiquitin protein ligase 2	---	1	0	1	0	0	0	0	0	0	chr1	-	53827970	53827885	0	0
Hecw2	e28.0	368181	368293	-1.21626	0.180625	chr1:53806874-54195168	HECT, C2 and WW domain containing E3 ubiquitin protein ligase 2	---	1	0	1	0	0	0	0	0	0	chr1	-	53826988	53826876	0	0
Gtf3c3	e1.0	1	214	1.25503	0.0479728	chr1:54395877-54439026	general transcription factor IIIC, polypeptide 3	ENSMUSG00000041303	0	0	1	0	0	0	0	0	0	chr1	-	54439026	54438813	0	0
Gtf3c3	e2.0	1084	1195	1.15372	0.240999	chr1:54395877-54439026	general transcription factor IIIC, polypeptide 3	ENSMUSG00000041303	0	0	1	0	0	0	0	0	0	chr1	-	54437943	54437832	0	1
Gtf3c3	e3.0	4789	4973	1.165	0.191224	chr1:54395877-54439026	general transcription factor IIIC, polypeptide 3	ENSMUSG00000041303	0	0	1	0	0	0	0	0	0	chr1	-	54434238	54434054	0	1
Gtf3c3	e4.0	8405	8528	1.04773	0.726257	chr1:54395877-54439026	general transcription factor IIIC, polypeptide 3	ENSMUSG00000041303	0	0	1	0	0	0	0	0	0	chr1	-	54430622	54430499	0	1
Gtf3c3	e5.0	10074	10265	1.01542	0.874988	chr1:54395877-54439026	general transcription factor IIIC, polypeptide 3	ENSMUSG00000041303	0	0	1	0	0	0	0	0	0	chr1	-	54428953	54428762	0	1
Gtf3c3	e6.0	11462	11627	-1.1794	0.10626	chr1:54395877-54439026	general transcription factor IIIC, polypeptide 3	ENSMUSG00000041303	0	0	1	0	0	0	0	0	0	chr1	-	54427565	54427400	0	1
Gtf3c3	e7.0	14871	15018	-1.23213	0.184645	chr1:54395877-54439026	general transcription factor IIIC, polypeptide 3	ENSMUSG00000041303	0	0	1	0	0	0	0	0	0	chr1	-	54424156	54424009	0	2
Pgap1	e1.0	1	262	-1.55461	0.373063	chr1:54473000-54557695	post-GPI attachment to proteins 1	ENSMUSG00000073678	0	0	1	0	0	0	0	0	0	chr1	-	54557695	54557434	0	0
Pgap1	e2.0	6566	6719	-1.32818	0.529095	chr1:54473000-54557695	post-GPI attachment to proteins 1	ENSMUSG00000073678	1	0	1	0	0	0	0	0	0	chr1	-	54551130	54550977	0	0
Pgap1	e3.0	9582	9757	1.15186	0.567394	chr1:54473000-54557695	post-GPI attachment to proteins 1	ENSMUSG00000073678	1	0	1	0	0	0	0	0	0	chr1	-	54548114	54547939	0	0
Pgap1	e4.0	14487	14658	1.25086	0.390507	chr1:54473000-54557695	post-GPI attachment to proteins 1	ENSMUSG00000073678	1	0	1	0	0	0	0	0	0	chr1	-	54543209	54543038	0	0
Pgap1	e5.0	21584	21741	-1.23397	0.640201	chr1:54473000-54557695	post-GPI attachment to proteins 1	ENSMUSG00000073678	1	0	1	0	0	0	0	0	0	chr1	-	54536112	54535955	0	0
Pgap1	e6.0	24225	24277	1.28719	0.576527	chr1:54473000-54557695	post-GPI attachment to proteins 1	ENSMUSG00000073678	1	0	1	0	0	0	0	0	0	chr1	-	54533471	54533419	0	0
Pgap1	e7.0	25608	25674	1.4631	0.205527	chr1:54473000-54557695	post-GPI attachment to proteins 1	ENSMUSG00000073678	1	0	1	0	0	0	0	0	0	chr1	-	54532088	54532022	0	0
Pgap1	e8.0	26737	26842	1.50879	0.100909	chr1:54473000-54557695	post-GPI attachment to proteins 1	ENSMUSG00000073678	1	0	1	0	0	0	0	0	0	chr1	-	54530959	54530854	0	0
Pgap1	e9.0	27524	27579	1.00187	0.99302	chr1:54473000-54557695	post-GPI attachment to proteins 1	ENSMUSG00000073678	1	0	1	0	0	0	0	0	0	chr1	-	54530172	54530117	0	0
Sf3b1	e1.0	1	144	-1.02584	0.893845	chr1:54985161-55027482	splicing factor 3b, subunit 1	---	0	0	1	0	0	0	0	0	0	chr1	-	55027482	55027339	0	0
Sf3b1	e2.0	8083	8249	-1.02695	0.783469	chr1:54985161-55027482	splicing factor 3b, subunit 1	---	0	0	1	0	0	0	0	0	0	chr1	-	55019400	55019234	0	2
Sf3b1	e3.0	10600	10704	1.10174	0.252573	chr1:54985161-55027482	splicing factor 3b, subunit 1	---	0	0	1	0	0	0	0	0	0	chr1	-	55016883	55016779	0	2
Sf3b1	e4.0	10993	11107	1.07423	0.603763	chr1:54985161-55027482	splicing factor 3b, subunit 1	---	0	0	1	0	0	0	0	0	0	chr1	-	55016490	55016376	0	2
Sf3b1	e5.0	12921	13000	-1.06027	0.630086	chr1:54985161-55027482	splicing factor 3b, subunit 1	---	0	0	1	0	0	0	0	0	0	chr1	-	55014562	55014483	0	2
Sf3b1	e6.0	15211	15381	1.12541	0.425753	chr1:54985161-55027482	splicing factor 3b, subunit 1	---	0	0	1	0	0	0	0	0	0	chr1	-	55012272	55012102	0	1
Sf3b1	e7.0	19766	20003	-1.1185	0.317478	chr1:54985161-55027482	splicing factor 3b, subunit 1	---	0	0	1	0	0	0	0	0	0	chr1	-	55007717	55007480	0	1
Sf3b1	e8.0	21100	21312	1.00528	0.938401	chr1:54985161-55027482	splicing factor 3b, subunit 1	---	0	0	1	0	0	0	0	0	0	chr1	-	55006383	55006171	0	1
Sf3b1	e9.0	21560	21681	-1.05871	0.571608	chr1:54985161-55027482	splicing factor 3b, subunit 1	---	0	0	1	0	0	0	0	0	0	chr1	-	55005923	55005802	0	1
Sf3b1	e10.0	23993	24190	-1.02047	0.787789	chr1:54985161-55027482	splicing factor 3b, subunit 1	---	0	0	1	0	0	0	0	0	0	chr1	-	55003490	55003293	0	1
Sf3b1	e11.0	24278	24379	-1.04216	0.816771	chr1:54985161-55027482	splicing factor 3b, subunit 1	---	0	0	1	0	0	0	0	0	0	chr1	-	55003205	55003104	0	0
Sf3b1	e12.0	25921	26100	-1.03848	0.745485	chr1:54985161-55027482	splicing factor 3b, subunit 1	---	0	0	1	0	0	0	0	0	0	chr1	-	55001562	55001383	0	0
Sf3b1	e13.0	26385	26471	-1.05456	0.664182	chr1:54985161-55027482	splicing factor 3b, subunit 1	---	0	0	1	0	0	0	0	0	0	chr1	-	55001098	55001012	0	0
Sf3b1	e14.0	26569	26839	-1.05917	0.658448	chr1:54985161-55027482	splicing factor 3b, subunit 1	---	0	0	1	0	0	0	0	0	0	chr1	-	55000914	55000644	0	0
Sf3b1	e15.0	27096	27241	-1.05616	0.656725	chr1:54985161-55027482	splicing factor 3b, subunit 1	---	0	0	1	0	0	0	0	0	0	chr1	-	55000387	55000242	0	0
Sf3b1	e16.0	27322	27468	1.05022	0.762536	chr1:54985161-55027482	splicing factor 3b, subunit 1	---	0	0	1	0	0	0	0	0	0	chr1	-	55000161	55000015	0	0
Sf3b1	e17.0	27731	27856	1.07899	0.59173	chr1:54985161-55027482	splicing factor 3b, subunit 1	---	0	0	1	0	0	0	0	0	0	chr1	-	54999752	54999627	0	0
Sf3b1	e18.0	29224	29445	-1.05473	0.63935	chr1:54985161-55027482	splicing factor 3b, subunit 1	---	0	0	1	0	0	0	0	0	0	chr1	-	54998259	54998038	0	0
Sf3b1	e19.0	30289	30471	1.03164	0.819001	chr1:54985161-55027482	splicing factor 3b, subunit 1	---	0	0	1	0	0	0	0	0	0	chr1	-	54997194	54997012	0	0
Sf3b1	e20.0	30555	30666	1.05279	0.752054	chr1:54985161-55027482	splicing factor 3b, subunit 1	---	0	0	1	0	0	0	0	0	0	chr1	-	54996928	54996817	0	0
Sf3b1	e21.0	31997	32117	1.004	0.980969	chr1:54985161-55027482	splicing factor 3b, subunit 1	---	0	0	1	0	0	0	0	0	0	chr1	-	54995486	54995366	0	0
Sf3b1	e22.0	33022	33153	-1.03925	0.820498	chr1:54985161-55027482	splicing factor 3b, subunit 1	---	0	0	1	0	0	0	0	0	0	chr1	-	54994461	54994330	0	0
Hspd1	e1.0	1	255	-1.28545	0.219382	chr1:55077833-55088243	heat shock protein 1 (chaperonin)	ENSMUSG00000025980	0	0	1	0	0	0	0	0	0	chr1	-	55088243	55087989	0	0
Hspd1	e2.0	312	465	-1.01706	0.930791	chr1:55077833-55088243	heat shock protein 1 (chaperonin)	ENSMUSG00000025980	0	0	1	0	0	0	0	0	0	chr1	-	55087932	55087779	0	0
Tyw5	e1.0	1	303	1.34371	0.0138126	chr1:57388245-57406686	tRNA-yW synthesizing protein 5	---	0	0	1	0	0	0	0	0	0	chr1	-	57406686	57406384	0	0
Tyw5	e2.0	5164	5299	1.18693	0.0560629	chr1:57388245-57406686	tRNA-yW synthesizing protein 5	---	0	0	1	0	0	0	0	0	0	chr1	-	57401523	57401388	0	2
Tyw5	e3.0	9891	9960	-1.25156	0.0377492	chr1:57388245-57406686	tRNA-yW synthesizing protein 5	---	0	0	1	0	0	0	0	0	0	chr1	-	57396796	57396727	0	2
Tyw5	e4.0	12596	12640	-1.11088	0.359044	chr1:57388245-57406686	tRNA-yW synthesizing protein 5	---	0	0	1	0	0	0	0	0	0	chr1	-	57394091	57394047	0	2
Tyw5	e5.0	12993	13017	1.52611	0.218861	chr1:57388245-57406686	tRNA-yW synthesizing protein 5	---	0	0	1	0	1	1	0	0	0	chr1	-	57393694	57393670	1	0
Tyw5	e6.0	13200	13337	1.01947	0.804789	chr1:57388245-57406686	tRNA-yW synthesizing protein 5	---	0	0	1	0	0	0	0	0	0	chr1	-	57393487	57393350	0	2
Tyw5	e7.0	15151	15238	-1.03444	0.796469	chr1:57388245-57406686	tRNA-yW synthesizing protein 5	---	1	0	1	0	0	0	0	0	0	chr1	-	57391536	57391449	0	2
Kctd18	e5.0	49435	49556	1.06325	0.88541	chr1:57955101-58018958	potassium channel tetramerisation domain containing 18	---	0	0	1	0	0	0	0	0	0	chr1	-	57969524	57969403	0	0
Kctd18	e7.0	53419	53608	1.06846	0.718754	chr1:57955101-58018958	potassium channel tetramerisation domain containing 18	---	0	0	1	0	0	1	0	0	0	chr1	-	57965540	57965351	0	1
Kctd18	e8.0	55698	55891	1.13343	0.474588	chr1:57955101-58018958	potassium channel tetramerisation domain containing 18	---	1	0	1	0	0	1	0	0	0	chr1	-	57963261	57963068	0	1
Ppil3	e2.0	854	904	-1.1217	0.132897	chr1:58430993-58445492	peptidylprolyl isomerase (cyclophilin)-like 3	---	0	0	1	0	0	0	0	0	0	chr1	-	58444639	58444589	0	2
Ppil3	e3.0	2894	2968	-1.0462	0.264519	chr1:58430993-58445492	peptidylprolyl isomerase (cyclophilin)-like 3	---	0	0	1	0	0	0	0	0	0	chr1	-	58442599	58442525	0	2
Fam126b	e1.0	1	122	1.03821	0.80273	chr1:58522806-58586333	family with sequence similarity 126, member B	---	0	0	1	0	0	0	0	0	0	chr1	-	58586333	58586212	0	0
Fam126b	e2.0	180	231	-1.69793	0.00657879	chr1:58522806-58586333	family with sequence similarity 126, member B	---	0	0	1	0	0	0	0	0	0	chr1	-	58586154	58586103	0	0
Tmem237	e2.0	311	457	-1.26191	0.652502	chr1:59100584-59120408	transmembrane protein 237	---	0	0	1	0	0	0	0	0	0	chr1	-	59120098	59119952	0	0
Tmem237	e3.0	600	706	1.16829	0.642136	chr1:59100584-59120408	transmembrane protein 237	---	0	0	1	0	0	0	0	0	0	chr1	-	59119809	59119703	0	0
Ica1l	e2.0	263	389	-1.13973	0.605811	chr1:59989068-60043185	islet cell autoantigen 1-like	---	0	0	1	1	0	0	0	0	0	chr1	-	60042923	60042797	0	0
Ino80d	e2.0	8558	8661	2.20212	0.0304327	chr1:62958419-63114316	INO80 complex subunit D	---	0	0	1	0	0	0	0	0	0	chr1	-	63105759	63105656	0	0
Ino80d	e3.0	20587	20677	2.06457	0.0531265	chr1:62958419-63114316	INO80 complex subunit D	---	0	0	1	0	0	0	0	0	0	chr1	-	63093730	63093640	0	0
Ino80d	e4.0	20877	21032	-1.17513	0.62563	chr1:62958419-63114316	INO80 complex subunit D	---	0	0	1	0	0	0	0	0	0	chr1	-	63093440	63093285	0	0
Ino80d	e6.0	27919	28649	-1.10706	0.640843	chr1:62958419-63114316	INO80 complex subunit D	---	0	0	1	0	0	0	0	0	0	chr1	-	63086398	63085668	0	0
Ino80d	e7.0	35256	35364	-1.37839	0.499913	chr1:62958419-63114316	INO80 complex subunit D	---	0	0	1	0	0	0	0	0	0	chr1	-	63079061	63078953	0	1
Ino80d	e8.0	39771	39995	-1.21021	0.449217	chr1:62958419-63114316	INO80 complex subunit D	---	0	0	1	0	0	0	0	0	0	chr1	-	63074546	63074322	0	1
Ino80d	e9.0	46024	46133	-1.86943	0.0449453	chr1:62958419-63114316	INO80 complex subunit D	---	0	0	1	0	0	0	0	0	0	chr1	-	63068293	63068184	0	1
Ino80d	e10.0	48480	48613	1.07124	0.860761	chr1:62958419-63114316	INO80 complex subunit D	---	0	0	1	0	0	0	0	0	0	chr1	-	63065837	63065704	0	1
Ndufs1	e1.0	1	237	1.07011	0.102058	chr1:63143585-63176822	NADH:ubiquinone oxidoreductase core subunit S1	---	0	0	1	0	0	0	0	0	0	chr1	-	63176822	63176586	0	0
Ndufs1	e2.0	4566	4669	-1.20523	0.186167	chr1:63143585-63176822	NADH:ubiquinone oxidoreductase core subunit S1	---	0	0	1	1	0	1	0	0	0	chr1	-	63172257	63172154	0	0
Ndufs1	e3.0	5909	5974	-1.07281	0.324549	chr1:63143585-63176822	NADH:ubiquinone oxidoreductase core subunit S1	---	0	0	1	0	0	0	0	0	0	chr1	-	63170914	63170849	0	2
Ndufs1	e4.0	6682	6773	-1.05403	0.255007	chr1:63143585-63176822	NADH:ubiquinone oxidoreductase core subunit S1	---	0	0	1	0	0	0	0	0	0	chr1	-	63170141	63170050	0	2
Ndufs1	e5.0	7487	7594	1.01631	0.714872	chr1:63143585-63176822	NADH:ubiquinone oxidoreductase core subunit S1	---	0	0	1	0	0	0	0	0	0	chr1	-	63169336	63169229	0	2
Ndufs1	e6.0	10456	10532	1.02145	0.586913	chr1:63143585-63176822	NADH:ubiquinone oxidoreductase core subunit S1	---	0	0	1	0	0	0	0	0	0	chr1	-	63166367	63166291	0	2
Ndufs1	e7.0	11793	11874	1.01394	0.722426	chr1:63143585-63176822	NADH:ubiquinone oxidoreductase core subunit S1	---	0	0	1	0	0	0	0	0	0	chr1	-	63165030	63164949	0	2
Ndufs1	e8.0	11963	12093	1.04712	0.194547	chr1:63143585-63176822	NADH:ubiquinone oxidoreductase core subunit S1	---	0	0	1	0	0	0	0	0	0	chr1	-	63164860	63164730	0	2
Ndufs1	e9.0	12971	13156	1.01337	0.611867	chr1:63143585-63176822	NADH:ubiquinone oxidoreductase core subunit S1	---	0	0	1	0	0	0	0	0	0	chr1	-	63163852	63163667	0	2
Ndufs1	e10.0	15809	15943	-1.0674	0.158221	chr1:63143585-63176822	NADH:ubiquinone oxidoreductase core subunit S1	---	0	0	1	0	0	0	0	0	0	chr1	-	63161014	63160880	0	2
Ndufs1	e11.0	16959	17073	-1.04781	0.140053	chr1:63143585-63176822	NADH:ubiquinone oxidoreductase core subunit S1	---	0	0	1	0	0	0	0	0	0	chr1	-	63159864	63159750	0	2
Ndufs1	e12.0	19546	19691	1.01416	0.794326	chr1:63143585-63176822	NADH:ubiquinone oxidoreductase core subunit S1	---	1	0	1	0	0	0	0	0	0	chr1	-	63157277	63157132	0	1
Ndufs1	e13.0	20491	20619	1.01423	0.764744	chr1:63143585-63176822	NADH:ubiquinone oxidoreductase core subunit S1	---	1	0	1	0	0	0	0	0	0	chr1	-	63156332	63156204	0	1
Ndufs1	e14.0	23919	24048	1.00191	0.953314	chr1:63143585-63176822	NADH:ubiquinone oxidoreductase core subunit S1	---	1	0	1	0	0	0	0	0	0	chr1	-	63152904	63152775	0	1
Ndufs1	e15.0	25112	25272	1.05064	0.199305	chr1:63143585-63176822	NADH:ubiquinone oxidoreductase core subunit S1	---	1	0	1	0	0	0	0	0	0	chr1	-	63151711	63151551	0	1
Ndufs1	e16.0	26712	26866	1.04776	0.273731	chr1:63143585-63176822	NADH:ubiquinone oxidoreductase core subunit S1	---	1	0	1	0	0	0	0	0	0	chr1	-	63150111	63149957	0	2
Ndufs1	e17.0	28252	28427	-1.0113	0.588536	chr1:63143585-63176822	NADH:ubiquinone oxidoreductase core subunit S1	---	1	0	1	0	0	0	0	0	0	chr1	-	63148571	63148396	0	2
Ndufs1	e18.0	29399	29533	1.06549	0.237788	chr1:63143585-63176822	NADH:ubiquinone oxidoreductase core subunit S1	---	1	0	1	0	0	0	0	0	0	chr1	-	63147424	63147290	0	1
Ndufs1	e19.0	29631	29703	1.05324	0.368496	chr1:63143585-63176822	NADH:ubiquinone oxidoreductase core subunit S1	---	1	0	1	0	0	0	0	0	0	chr1	-	63147192	63147120	0	1
Klf7	e1.0	1	41	1.79641	0.026975	chr1:64029463-64121426	Kruppel-like factor 7 (ubiquitous)	ENSMUSG00000025959	0	0	1	0	0	0	0	0	0	chr1	-	64121426	64121386	0	0
Plekhm3	e1.0	1	130	-1.11628	0.708264	chr1:64785984-64956824	pleckstrin homology domain containing, family M, member 3	ENSMUSG00000051344	0	0	1	0	0	0	0	0	0	chr1	-	64956824	64956695	0	0
Plekhm3	e2.0	18286	19128	-1.04212	0.623573	chr1:64785984-64956824	pleckstrin homology domain containing, family M, member 3	ENSMUSG00000051344	0	0	1	0	0	0	0	0	0	chr1	-	64938539	64937697	0	0
Plekhm3	e4.0	34343	35275	-1.00378	0.937785	chr1:64785984-64956824	pleckstrin homology domain containing, family M, member 3	ENSMUSG00000051344	0	0	1	0	0	0	0	0	0	chr1	-	64922482	64921550	0	1
Plekhm3	e5.0	63928	64073	-1.09396	0.424651	chr1:64785984-64956824	pleckstrin homology domain containing, family M, member 3	ENSMUSG00000051344	0	0	1	0	0	0	0	0	0	chr1	-	64892897	64892752	0	1
Plekhm3	e6.0	73503	73696	-1.02326	0.845659	chr1:64785984-64956824	pleckstrin homology domain containing, family M, member 3	ENSMUSG00000051344	0	0	1	0	0	0	0	0	0	chr1	-	64883322	64883129	0	1
Plekhm3	e7.0	95575	95638	1.07795	0.53066	chr1:64785984-64956824	pleckstrin homology domain containing, family M, member 3	ENSMUSG00000051344	0	0	1	0	0	0	0	0	0	chr1	-	64861250	64861187	0	1
Idh1	e1.0	1	175	1.37769	0.224829	chr1:65158616-65186479	isocitrate dehydrogenase 1 (NADP+), soluble	---	0	0	1	0	0	0	0	0	0	chr1	-	65186479	65186305	0	0
Idh1	e2.0	7338	7490	-1.17491	0.195369	chr1:65158616-65186479	isocitrate dehydrogenase 1 (NADP+), soluble	---	0	0	1	0	0	0	0	0	0	chr1	-	65179142	65178990	0	0
Lancl1	e1.0	1	97	-1.03543	0.812406	chr1:67000517-67038872	LanC (bacterial lantibiotic synthetase component C)-like 1	---	0	0	1	0	0	0	0	0	0	chr1	-	67038872	67038776	0	0
Lancl1	e2.0	282	378	-1.02527	0.633402	chr1:67000517-67038872	LanC (bacterial lantibiotic synthetase component C)-like 1	---	0	0	1	0	0	0	0	0	0	chr1	-	67038591	67038495	0	0
Lancl1	e3.0	4632	4749	1.03707	0.277751	chr1:67000517-67038872	LanC (bacterial lantibiotic synthetase component C)-like 1	---	0	0	1	0	0	0	0	0	0	chr1	-	67034241	67034124	0	1
Usp37	e3.0	38467	38628	-1.55962	0.336355	chr1:74435510-74544287	ubiquitin specific peptidase 37	---	0	0	1	0	0	0	0	0	0	chr1	-	74505821	74505660	0	0
Cnppd1	e2.0	152	654	-1.13376	0.406126	chr1:75134554-75142711	cyclin Pas1/PHO80 domain containing 1	---	0	0	1	0	0	0	0	0	0	chr1	-	75142560	75142058	0	0
Cnppd1	e3.0	1209	1296	-1.16855	0.161332	chr1:75134554-75142711	cyclin Pas1/PHO80 domain containing 1	---	0	0	1	0	0	0	0	0	0	chr1	-	75141503	75141416	0	0
Cnppd1	e4.0	1706	1814	1.21091	0.248887	chr1:75134554-75142711	cyclin Pas1/PHO80 domain containing 1	---	0	0	1	0	0	0	0	0	0	chr1	-	75141006	75140898	0	0
Cnppd1	e5.0	2810	2891	1.45339	0.0746274	chr1:75134554-75142711	cyclin Pas1/PHO80 domain containing 1	---	0	0	1	0	0	0	0	0	0	chr1	-	75139902	75139821	0	0
Cnppd1	e6.0	3033	3153	1.04429	0.711597	chr1:75134554-75142711	cyclin Pas1/PHO80 domain containing 1	---	0	0	1	0	0	0	0	0	0	chr1	-	75139679	75139559	0	0
Cnppd1	e7.0	3237	3365	-1.12268	0.105468	chr1:75134554-75142711	cyclin Pas1/PHO80 domain containing 1	---	0	0	1	0	0	0	0	0	0	chr1	-	75139475	75139347	0	1
Atg9a	e1.0	1	187	-1.01517	0.889293	chr1:75180861-75192010	autophagy related 9A	---	0	0	1	0	0	0	0	0	0	chr1	-	75192010	75191824	0	0
Atg9a	e2.0	284	524	1.22427	0.141415	chr1:75180861-75192010	autophagy related 9A	---	0	0	1	0	0	0	0	0	0	chr1	-	75191727	75191487	0	0
Glb1l	e5.0	2401	2461	1.11414	0.769538	chr1:75197291-75210779	galactosidase, beta 1-like	---	0	0	1	0	0	0	0	0	0	chr1	-	75208379	75208319	0	1
Glb1l	e7.0	8031	8205	-1.74885	0.153939	chr1:75197291-75210779	galactosidase, beta 1-like	---	1	0	1	0	0	0	0	0	0	chr1	-	75202749	75202575	0	0
Glb1l	e8.0	8314	8372	-1.30093	0.312952	chr1:75197291-75210779	galactosidase, beta 1-like	---	1	0	1	0	0	0	0	0	0	chr1	-	75202466	75202408	0	0
Glb1l	e11.0	8919	9037	3.81624	0.00791602	chr1:75197291-75210779	galactosidase, beta 1-like	---	1	0	1	0	0	0	0	0	0	chr1	-	75201861	75201743	0	0
Glb1l	e12.0	9307	9381	2.32709	0.0830791	chr1:75197291-75210779	galactosidase, beta 1-like	---	1	0	1	0	0	0	0	0	0	chr1	-	75201473	75201399	0	0
Glb1l	e13.0	9493	9582	1.11472	0.822832	chr1:75197291-75210779	galactosidase, beta 1-like	---	1	0	1	0	0	0	0	0	0	chr1	-	75201287	75201198	0	0
Tuba4a	e1.0	1	102	1.02332	0.7741	chr1:75214972-75219294	tubulin, alpha 4A	ENSMUSG00000026202	0	0	1	0	0	0	0	0	0	chr1	-	75219294	75219193	0	0
Ptprn	e1.0	1	213	1.16438	0.248731	chr1:75247027-75264216	protein tyrosine phosphatase, receptor type, N	ENSMUSG00000026204	0	0	1	0	0	0	0	0	0	chr1	-	75264216	75264004	0	0
Dnpep	e1.0	1	303	-1.18262	0.273057	chr1:75307896-75317637	aspartyl aminopeptidase	---	0	0	1	0	0	0	0	0	0	chr1	-	75317637	75317335	0	0
Dnpep	e2.0	621	747	1.34321	0.273714	chr1:75307896-75317637	aspartyl aminopeptidase	---	0	0	1	0	0	0	0	0	0	chr1	-	75317017	75316891	0	0
Chpf	e1.0	1	680	-1.0209	0.83961	chr1:75474571-75479471	chondroitin polymerizing factor	---	0	0	1	0	0	0	0	0	0	chr1	-	75479471	75478792	0	0
Obsl1	e2.0	2489	2758	-1.07566	0.583603	chr1:75485825-75506454	obscurin-like 1	---	0	0	1	0	0	0	0	0	0	chr1	-	75503966	75503697	0	1
Wdfy1	e1.0	1	207	-1.08221	0.835449	chr1:79702264-79761770	WD repeat and FYVE domain containing 1	---	0	0	1	0	0	0	0	0	0	chr1	-	79761770	79761564	0	0
Wdfy1	e2.0	21642	21709	-1.479	0.0513281	chr1:79702264-79761770	WD repeat and FYVE domain containing 1	---	0	0	1	0	0	0	0	0	0	chr1	-	79740129	79740062	0	1
Serpine2	e1.0	1	155	-1.21205	0.521099	chr1:79794197-79858665	serine (or cysteine) peptidase inhibitor, clade E, member 2	ENSMUSG00000026249	0	0	1	0	0	0	0	0	0	chr1	-	79858665	79858511	0	0
Serpine2	e2.0	37109	37389	1.03416	0.754065	chr1:79794197-79858665	serine (or cysteine) peptidase inhibitor, clade E, member 2	ENSMUSG00000026249	0	0	1	0	0	0	0	0	0	chr1	-	79821557	79821277	0	2
Pid1	e3.0	56466	56770	-1.10384	0.377763	chr1:84036293-84341110	phosphotyrosine interaction domain containing 1	ENSMUSG00000045658	0	0	1	0	0	0	0	0	0	chr1	-	84284645	84284341	0	0
Trip12	e3.0	1214	1289	-1.05656	0.87938	chr1:84721189-84840517	thyroid hormone receptor interactor 12	---	0	0	1	0	0	0	0	0	0	chr1	-	84839304	84839229	0	0
Trip12	e4.0	25549	25695	1.13066	0.318656	chr1:84721189-84840517	thyroid hormone receptor interactor 12	---	0	0	1	0	0	0	0	0	0	chr1	-	84814969	84814823	0	0
Trip12	e5.0	46191	46993	-1.13843	0.199448	chr1:84721189-84840517	thyroid hormone receptor interactor 12	---	0	0	1	0	0	0	0	0	0	chr1	-	84794327	84793525	0	0
Trip12	e7.0	54322	54427	1.0043	0.977398	chr1:84721189-84840517	thyroid hormone receptor interactor 12	---	0	0	1	0	0	0	0	0	0	chr1	-	84786196	84786091	0	0
Trip12	e8.0	57555	57691	-1.43925	0.0937083	chr1:84721189-84840517	thyroid hormone receptor interactor 12	---	0	0	1	0	0	0	0	0	0	chr1	-	84782963	84782827	0	0
Trip12	e9.0	63011	63094	-1.16035	0.30038	chr1:84721189-84840517	thyroid hormone receptor interactor 12	---	1	0	1	0	0	0	0	0	0	chr1	-	84777507	84777424	0	0
Trip12	e10.0	64106	64201	-1.23763	0.392315	chr1:84721189-84840517	thyroid hormone receptor interactor 12	---	1	0	1	0	0	0	0	0	0	chr1	-	84776412	84776317	0	0
Trip12	e11.0	71787	71935	-1.29029	0.120239	chr1:84721189-84840517	thyroid hormone receptor interactor 12	---	1	0	1	0	0	0	0	0	0	chr1	-	84768731	84768583	0	0
Trip12	e12.0	74324	74359	-1.15704	0.406829	chr1:84721189-84840517	thyroid hormone receptor interactor 12	---	1	0	1	0	0	0	0	0	0	chr1	-	84766194	84766159	0	0
Trip12	e13.0	74443	74538	-1.37666	0.0191064	chr1:84721189-84840517	thyroid hormone receptor interactor 12	---	1	0	1	0	0	0	0	0	0	chr1	-	84766075	84765980	0	0
Trip12	e14.0	76587	76679	-1.28954	0.231288	chr1:84721189-84840517	thyroid hormone receptor interactor 12	---	1	0	1	0	0	0	0	0	0	chr1	-	84763931	84763839	0	0
Trip12	e15.0	77029	77190	-1.32661	0.322516	chr1:84721189-84840517	thyroid hormone receptor interactor 12	---	1	0	1	0	0	0	0	0	0	chr1	-	84763489	84763328	0	0
Trip12	e16.0	78331	78399	-1.28987	0.401618	chr1:84721189-84840517	thyroid hormone receptor interactor 12	---	1	0	1	0	0	0	0	0	0	chr1	-	84762187	84762119	0	0
Trip12	e17.0	78489	78654	-1.1794	0.206322	chr1:84721189-84840517	thyroid hormone receptor interactor 12	---	1	0	1	0	0	0	0	0	0	chr1	-	84762029	84761864	0	0
Trip12	e18.0	79390	79507	1.04482	0.77728	chr1:84721189-84840517	thyroid hormone receptor interactor 12	---	1	0	1	0	0	0	0	0	0	chr1	-	84761128	84761011	0	0
Trip12	e19.0	79599	79755	-1.00974	0.955324	chr1:84721189-84840517	thyroid hormone receptor interactor 12	---	1	0	1	0	0	0	0	0	0	chr1	-	84760919	84760763	0	0
Ngef	e4.0	63509	63778	-1.17028	0.332264	chr1:87476838-87573870	neuronal guanine nucleotide exchange factor	---	0	0	1	0	0	0	0	0	0	chr1	-	87510362	87510093	0	0
Hes6	e2.0	808	982	1.04923	0.82727	chr1:91411482-91414038	hairy and enhancer of split 6	ENSMUSG00000067071	0	0	1	0	0	0	0	0	0	chr1	-	91413231	91413057	0	0
Hdac4	e2.0	31850	32088	-1.06244	0.624106	chr1:91928779-92180343	histone deacetylase 4	ENSMUSG00000026313	0	0	1	0	0	0	0	0	0	chr1	-	92148494	92148256	0	0
Hdac4	e3.0	125372	125443	-1.12954	0.461992	chr1:91928779-92180343	histone deacetylase 4	ENSMUSG00000026313	0	0	1	0	0	0	0	0	0	chr1	-	92054972	92054901	0	0
Hdac4	e4.0	150148	150389	1.00716	0.960059	chr1:91928779-92180343	histone deacetylase 4	ENSMUSG00000026313	0	0	1	0	0	0	0	0	0	chr1	-	92030196	92029955	0	0
Hdac4	e5.0	167525	167675	1.31364	0.303353	chr1:91928779-92180343	histone deacetylase 4	ENSMUSG00000026313	0	0	1	0	0	0	0	0	0	chr1	-	92012819	92012669	0	0
Hdac4	e7.0	178069	178189	-1.09311	0.610036	chr1:91928779-92180343	histone deacetylase 4	ENSMUSG00000026313	1	0	1	0	0	0	0	0	0	chr1	-	92002275	92002155	0	0
Hdac4	e8.0	184166	184287	-1.21289	0.310492	chr1:91928779-92180343	histone deacetylase 4	ENSMUSG00000026313	1	0	1	0	0	0	0	0	0	chr1	-	91996178	91996057	0	0
Hdlbp	e1.0	1	205	1.03718	0.816236	chr1:93405940-93478917	high density lipoprotein (HDL) binding protein	---	0	0	1	0	0	0	0	0	0	chr1	-	93478917	93478713	0	0
Hdlbp	e2.0	537	711	1.0609	0.843023	chr1:93405940-93478917	high density lipoprotein (HDL) binding protein	---	0	0	1	0	0	0	0	0	0	chr1	-	93478381	93478207	0	0
Stk25	e1.0	1	181	-1.23246	0.582644	chr1:93619751-93635727	serine/threonine kinase 25 (yeast)	ENSMUSG00000026277	0	0	1	0	0	0	0	0	0	chr1	-	93635727	93635547	0	0
Thap4	e1.0	1	408	-1.04317	0.778079	chr1:93701935-93754864	THAP domain containing 4	---	0	0	1	0	0	0	0	0	0	chr1	-	93754864	93754457	0	0
Thap4	e3.0	22939	23008	1.17364	0.263684	chr1:93701935-93754864	THAP domain containing 4	---	0	0	1	0	0	0	0	0	0	chr1	-	93731926	93731857	0	0
Macir	e1.0	1	188	1.16107	0.144165	chr1:97643902-97662018	macrophage immunometabolism regulator	---	0	0	1	0	0	0	0	0	0	chr1	-	97662018	97661831	0	0
Macir	e3.0	7330	7419	-1.0745	0.35458	chr1:97643902-97662018	macrophage immunometabolism regulator	---	0	0	1	0	0	1	0	0	0	chr1	-	97654689	97654600	0	2
Ppip5k2	e2.0	8593	8989	-1.13274	0.58747	chr1:97706043-97770413	diphosphoinositol pentakisphosphate kinase 2	---	0	0	1	0	0	0	0	0	0	chr1	-	97761821	97761425	0	0
Ppip5k2	e3.0	11050	11245	-1.23883	0.555748	chr1:97706043-97770413	diphosphoinositol pentakisphosphate kinase 2	---	0	0	1	0	0	0	0	0	0	chr1	-	97759364	97759169	0	0
Ppip5k2	e4.0	13480	13570	-1.6151	0.204212	chr1:97706043-97770413	diphosphoinositol pentakisphosphate kinase 2	---	0	0	1	0	0	0	0	0	0	chr1	-	97756934	97756844	0	0
Ppip5k2	e5.0	14443	14528	-1.11003	0.799469	chr1:97706043-97770413	diphosphoinositol pentakisphosphate kinase 2	---	0	0	1	0	0	0	0	0	0	chr1	-	97755971	97755886	0	0
Ppip5k2	e6.0	15205	15359	1.17667	0.522889	chr1:97706043-97770413	diphosphoinositol pentakisphosphate kinase 2	---	0	0	1	0	0	0	0	0	0	chr1	-	97755209	97755055	0	0
Ppip5k2	e7.0	17609	17710	1.12062	0.505043	chr1:97706043-97770413	diphosphoinositol pentakisphosphate kinase 2	---	0	0	1	0	0	0	0	0	0	chr1	-	97752805	97752704	0	0
Ppip5k2	e8.0	19686	19847	-1.23563	0.464476	chr1:97706043-97770413	diphosphoinositol pentakisphosphate kinase 2	---	0	0	1	0	0	0	0	0	0	chr1	-	97750728	97750567	0	0
Ppip5k2	e9.0	20751	20872	-1.53088	0.191794	chr1:97706043-97770413	diphosphoinositol pentakisphosphate kinase 2	---	0	0	1	0	0	0	0	0	0	chr1	-	97749663	97749542	0	1
Ppip5k2	e10.0	22766	22867	-1.38758	0.272671	chr1:97706043-97770413	diphosphoinositol pentakisphosphate kinase 2	---	0	0	1	0	0	0	0	0	0	chr1	-	97747648	97747547	0	1
Ppip5k2	e11.0	23910	23996	-1.2108	0.413612	chr1:97706043-97770413	diphosphoinositol pentakisphosphate kinase 2	---	0	0	1	0	0	0	0	0	0	chr1	-	97746504	97746418	0	1
Ppip5k2	e12.0	24944	25023	-1.61426	0.04948	chr1:97706043-97770413	diphosphoinositol pentakisphosphate kinase 2	---	0	0	1	0	0	0	0	0	0	chr1	-	97745470	97745391	0	1
Ppip5k2	e13.0	25146	25251	-1.34449	0.26445	chr1:97706043-97770413	diphosphoinositol pentakisphosphate kinase 2	---	0	0	1	0	0	0	0	0	0	chr1	-	97745268	97745163	0	1
Ppip5k2	e14.0	26272	26357	1.23371	0.366564	chr1:97706043-97770413	diphosphoinositol pentakisphosphate kinase 2	---	0	0	1	0	0	0	0	0	0	chr1	-	97744142	97744057	0	1
Ppip5k2	e15.0	29219	29344	1.32866	0.0631625	chr1:97706043-97770413	diphosphoinositol pentakisphosphate kinase 2	---	1	0	1	0	0	0	0	0	0	chr1	-	97741195	97741070	0	1
Ppip5k2	e17.0	29770	29952	1.43266	0.140179	chr1:97706043-97770413	diphosphoinositol pentakisphosphate kinase 2	---	1	0	1	0	0	0	0	0	0	chr1	-	97740644	97740462	0	1
Ppip5k2	e18.0	35306	35447	1.08944	0.252887	chr1:97706043-97770413	diphosphoinositol pentakisphosphate kinase 2	---	1	0	1	0	0	0	0	0	0	chr1	-	97735108	97734967	0	1
Ppip5k2	e19.0	36305	36528	-1.23985	0.451005	chr1:97706043-97770413	diphosphoinositol pentakisphosphate kinase 2	---	1	0	1	0	0	0	0	0	0	chr1	-	97734109	97733886	0	1
Ppip5k2	e20.0	40376	40503	1.00771	0.942224	chr1:97706043-97770413	diphosphoinositol pentakisphosphate kinase 2	---	1	0	1	0	0	0	0	0	0	chr1	-	97730038	97729911	0	1
Ppip5k2	e21.0	41382	41496	-1.0452	0.838641	chr1:97706043-97770413	diphosphoinositol pentakisphosphate kinase 2	---	1	0	1	0	0	0	0	0	0	chr1	-	97729032	97728918	0	1
Ppip5k2	e22.0	42912	43019	-1.15146	0.376288	chr1:97706043-97770413	diphosphoinositol pentakisphosphate kinase 2	---	1	0	1	0	0	0	0	0	0	chr1	-	97727502	97727395	0	1
Ppip5k2	e23.0	43109	43225	-1.19326	0.41786	chr1:97706043-97770413	diphosphoinositol pentakisphosphate kinase 2	---	1	0	1	0	0	0	0	0	0	chr1	-	97727305	97727189	0	0
Ppip5k2	e24.0	46580	46744	-1.17142	0.459882	chr1:97706043-97770413	diphosphoinositol pentakisphosphate kinase 2	---	1	0	1	0	0	0	0	0	0	chr1	-	97723834	97723670	0	0
Ppip5k2	e25.0	50508	50580	-1.23294	0.370316	chr1:97706043-97770413	diphosphoinositol pentakisphosphate kinase 2	---	1	0	1	0	0	0	0	0	0	chr1	-	97719906	97719834	0	1
Pign	e1.0	1	178	1.03482	0.88096	chr1:105382279-105663677	phosphatidylinositol glycan anchor biosynthesis, class N	---	0	0	1	0	0	0	0	0	0	chr1	-	105663677	105663500	0	0
Pign	e2.0	4312	4385	-1.1235	0.36529	chr1:105382279-105663677	phosphatidylinositol glycan anchor biosynthesis, class N	---	0	0	1	0	0	0	0	0	0	chr1	-	105659366	105659293	0	1
Pign	e4.0	5828	6076	-1.3043	0.370497	chr1:105382279-105663677	phosphatidylinositol glycan anchor biosynthesis, class N	---	1	0	1	0	0	0	0	0	0	chr1	-	105657850	105657602	0	1
Pign	e5.0	6891	7012	-1.2219	0.44556	chr1:105382279-105663677	phosphatidylinositol glycan anchor biosynthesis, class N	---	1	0	1	0	0	0	0	0	0	chr1	-	105656787	105656666	0	1
Pign	e6.0	7646	7744	1.14404	0.425592	chr1:105382279-105663677	phosphatidylinositol glycan anchor biosynthesis, class N	---	1	0	1	0	0	0	0	0	0	chr1	-	105656032	105655934	0	1
Pign	e7.0	10468	10574	1.03955	0.813273	chr1:105382279-105663677	phosphatidylinositol glycan anchor biosynthesis, class N	---	1	0	1	0	0	0	0	0	0	chr1	-	105653210	105653104	0	1
Pign	e8.0	14271	14395	-1.36196	0.52463	chr1:105382279-105663677	phosphatidylinositol glycan anchor biosynthesis, class N	---	1	0	1	0	0	0	0	0	0	chr1	-	105649407	105649283	0	1
Pign	e9.0	15439	15569	-1.75907	0.0896178	chr1:105382279-105663677	phosphatidylinositol glycan anchor biosynthesis, class N	---	1	0	1	0	0	0	0	0	0	chr1	-	105648239	105648109	0	1
Pign	e10.0	16864	16980	-1.01392	0.958771	chr1:105382279-105663677	phosphatidylinositol glycan anchor biosynthesis, class N	---	1	0	1	0	0	0	0	0	0	chr1	-	105646814	105646698	0	1
Pign	e11.0	19159	19199	1.0601	0.874932	chr1:105382279-105663677	phosphatidylinositol glycan anchor biosynthesis, class N	---	1	0	1	0	0	0	0	0	0	chr1	-	105644519	105644479	0	0
Pign	e12.0	22954	23013	-1.52788	0.36902	chr1:105382279-105663677	phosphatidylinositol glycan anchor biosynthesis, class N	---	1	0	1	0	0	0	0	0	0	chr1	-	105640724	105640665	0	0
Pign	e13.0	25403	25495	-1.48324	0.524132	chr1:105382279-105663677	phosphatidylinositol glycan anchor biosynthesis, class N	---	1	0	1	0	0	0	0	0	0	chr1	-	105638275	105638183	0	0
Pign	e14.0	26113	26168	-1.09598	0.828088	chr1:105382279-105663677	phosphatidylinositol glycan anchor biosynthesis, class N	---	1	0	1	0	0	0	0	0	0	chr1	-	105637565	105637510	0	0
Pign	e15.0	64551	64629	-1.46766	0.211149	chr1:105382279-105663677	phosphatidylinositol glycan anchor biosynthesis, class N	---	1	0	1	0	0	0	0	0	0	chr1	-	105599127	105599049	0	0
Pign	e16.0	65828	66010	-1.93082	0.0933519	chr1:105382279-105663677	phosphatidylinositol glycan anchor biosynthesis, class N	---	1	0	1	0	0	0	0	0	0	chr1	-	105597850	105597668	0	0
Pign	e17.0	71917	72056	-1.39143	0.276801	chr1:105382279-105663677	phosphatidylinositol glycan anchor biosynthesis, class N	---	1	0	1	0	0	0	0	0	0	chr1	-	105591761	105591622	0	0
Pign	e18.0	74353	74452	-1.36461	0.267385	chr1:105382279-105663677	phosphatidylinositol glycan anchor biosynthesis, class N	---	1	0	1	0	0	0	0	0	0	chr1	-	105589325	105589226	0	0
Pign	e19.0	74537	74629	1.2865	0.494202	chr1:105382279-105663677	phosphatidylinositol glycan anchor biosynthesis, class N	---	1	0	1	0	0	0	0	0	0	chr1	-	105589141	105589049	0	0
Pign	e20.0	75607	75698	-1.00018	0.999663	chr1:105382279-105663677	phosphatidylinositol glycan anchor biosynthesis, class N	---	1	0	1	0	0	0	0	0	0	chr1	-	105588071	105587980	0	0
Pign	e21.0	78581	78689	1.27539	0.165277	chr1:105382279-105663677	phosphatidylinositol glycan anchor biosynthesis, class N	---	1	0	1	0	0	0	0	0	0	chr1	-	105585097	105584989	0	0
Pign	e22.0	83648	83756	-1.10464	0.57526	chr1:105382279-105663677	phosphatidylinositol glycan anchor biosynthesis, class N	---	1	0	1	0	0	0	0	0	0	chr1	-	105580030	105579922	0	0
Tsn	e1.0	1	739	1.09008	0.245285	chr1:118298155-118311739	translin	ENSMUSG00000026374	0	0	1	0	0	0	0	0	0	chr1	-	118311739	118311001	0	0
Tsn	e2.0	1012	1103	1.16214	0.216918	chr1:118298155-118311739	translin	ENSMUSG00000026374	0	0	1	0	0	0	0	0	0	chr1	-	118310728	118310637	0	0
Ptpn4	e1.0	1	446	-1.30531	0.207361	chr1:119658044-119837347	protein tyrosine phosphatase, non-receptor type 4	ENSMUSG00000026384	0	0	1	0	0	0	0	0	0	chr1	-	119837347	119836902	0	0
Ptpn4	e2.0	34871	35025	1.18361	0.00264682	chr1:119658044-119837347	protein tyrosine phosphatase, non-receptor type 4	ENSMUSG00000026384	0	0	1	0	0	0	0	0	0	chr1	-	119802477	119802323	0	0
Ptpn4	e3.0	53759	53866	1.02895	0.820393	chr1:119658044-119837347	protein tyrosine phosphatase, non-receptor type 4	ENSMUSG00000026384	0	0	1	0	0	0	0	0	0	chr1	-	119783589	119783482	0	1
Ptpn4	e4.0	64077	64119	1.17563	0.0876111	chr1:119658044-119837347	protein tyrosine phosphatase, non-receptor type 4	ENSMUSG00000026384	0	0	1	0	0	0	0	0	0	chr1	-	119773271	119773229	0	1
Ptpn4	e5.0	64221	64299	1.07878	0.186054	chr1:119658044-119837347	protein tyrosine phosphatase, non-receptor type 4	ENSMUSG00000026384	0	0	1	0	0	0	0	0	0	chr1	-	119773127	119773049	0	1
Ptpn4	e6.0	71426	71470	-1.13257	0.342315	chr1:119658044-119837347	protein tyrosine phosphatase, non-receptor type 4	ENSMUSG00000026384	0	0	1	0	0	0	0	0	0	chr1	-	119765922	119765878	0	1
Ptpn4	e7.0	71867	71919	-1.23133	0.226735	chr1:119658044-119837347	protein tyrosine phosphatase, non-receptor type 4	ENSMUSG00000026384	0	0	1	0	0	0	0	0	0	chr1	-	119765481	119765429	0	1
Ptpn4	e8.0	72197	72317	-1.16105	0.0864564	chr1:119658044-119837347	protein tyrosine phosphatase, non-receptor type 4	ENSMUSG00000026384	0	0	1	0	0	0	0	0	0	chr1	-	119765151	119765031	0	1
Ptpn4	e9.0	93909	93996	-1.13127	0.138666	chr1:119658044-119837347	protein tyrosine phosphatase, non-receptor type 4	ENSMUSG00000026384	0	0	1	0	0	0	0	0	0	chr1	-	119743439	119743352	0	1
Ptpn4	e10.0	95905	95993	-1.11981	0.124357	chr1:119658044-119837347	protein tyrosine phosphatase, non-receptor type 4	ENSMUSG00000026384	0	0	1	0	0	0	0	0	0	chr1	-	119741443	119741355	0	1
Ptpn4	e11.0	111252	111315	-1.2803	0.0373568	chr1:119658044-119837347	protein tyrosine phosphatase, non-receptor type 4	ENSMUSG00000026384	0	0	1	0	0	0	0	0	0	chr1	-	119726096	119726033	0	1
Ptpn4	e12.0	115312	115484	1.1487	0.180056	chr1:119658044-119837347	protein tyrosine phosphatase, non-receptor type 4	ENSMUSG00000026384	0	0	1	0	0	0	0	0	0	chr1	-	119722036	119721864	0	1
Ptpn4	e13.0	121333	121401	1.02408	0.780305	chr1:119658044-119837347	protein tyrosine phosphatase, non-receptor type 4	ENSMUSG00000026384	0	0	1	0	0	0	0	0	0	chr1	-	119716015	119715947	0	1
Ptpn4	e14.0	129447	129572	-1.03217	0.495115	chr1:119658044-119837347	protein tyrosine phosphatase, non-receptor type 4	ENSMUSG00000026384	0	0	1	0	0	0	0	0	0	chr1	-	119707901	119707776	0	1
Ptpn4	e15.0	131035	131193	-1.08019	0.325503	chr1:119658044-119837347	protein tyrosine phosphatase, non-receptor type 4	ENSMUSG00000026384	0	0	1	0	0	0	0	0	0	chr1	-	119706313	119706155	0	1
Ptpn4	e16.0	144439	144598	1.05635	0.318806	chr1:119658044-119837347	protein tyrosine phosphatase, non-receptor type 4	ENSMUSG00000026384	0	0	1	0	0	0	0	0	0	chr1	-	119692909	119692750	0	1
Dpp10	e1.0	1	189	-1.04803	0.57235	chr1:123332139-124045559	dipeptidylpeptidase 10	---	0	0	1	0	0	0	0	0	0	chr1	-	124045559	124045371	0	0
Dpp10	e2.0	359244	359343	1.02019	0.825995	chr1:123332139-124045559	dipeptidylpeptidase 10	---	0	0	1	0	0	0	0	0	0	chr1	-	123686316	123686217	0	0
Actr3	e2.0	271	443	-1.27653	0.300514	chr1:125392905-125435727	ARP3 actin-related protein 3	---	0	0	1	0	0	0	0	0	0	chr1	-	125435457	125435285	0	1
Actr3	e3.0	17424	17479	1.02336	0.854508	chr1:125392905-125435727	ARP3 actin-related protein 3	---	0	0	1	0	0	0	0	0	0	chr1	-	125418304	125418249	0	1
Actr3	e4.0	19348	19472	1.03935	0.512224	chr1:125392905-125435727	ARP3 actin-related protein 3	---	0	0	1	0	0	0	0	0	0	chr1	-	125416380	125416256	0	1
Actr3	e5.0	24354	24464	-1.02078	0.792262	chr1:125392905-125435727	ARP3 actin-related protein 3	---	0	0	1	0	0	0	0	0	0	chr1	-	125411374	125411264	0	1
Actr3	e6.0	27113	27208	1.0019	0.964846	chr1:125392905-125435727	ARP3 actin-related protein 3	---	0	0	1	0	0	0	0	0	0	chr1	-	125408615	125408520	0	1
Actr3	e7.0	28329	28436	-1.00691	0.81321	chr1:125392905-125435727	ARP3 actin-related protein 3	---	0	0	1	0	0	0	0	0	0	chr1	-	125407399	125407292	0	1
Actr3	e8.0	29740	29883	1.02765	0.413567	chr1:125392905-125435727	ARP3 actin-related protein 3	---	0	0	1	0	0	0	0	0	0	chr1	-	125405988	125405845	0	1
Actr3	e9.0	32162	32335	1.01232	0.741647	chr1:125392905-125435727	ARP3 actin-related protein 3	---	0	0	1	0	0	0	0	0	0	chr1	-	125403566	125403393	0	1
Lypd1	e2.0	715	1092	1.06534	0.834534	chr1:125867624-125912930	Ly6/Plaur domain containing 1	---	0	0	1	0	0	0	0	0	0	chr1	-	125912216	125911839	0	0
Rassf5	e1.0	1	492	1.03745	0.887419	chr1:131176412-131245180	Ras association (RalGDS/AF-6) domain family member 5	---	0	0	1	0	0	0	0	0	0	chr1	-	131245180	131244689	0	0
Rassf5	e2.0	32803	32924	1.0896	0.562689	chr1:131176412-131245180	Ras association (RalGDS/AF-6) domain family member 5	---	0	0	1	0	0	0	0	0	0	chr1	-	131212378	131212257	0	1
Srgap2	e1.0	1	129	-1.03979	0.852771	chr1:131285251-131527361	SLIT-ROBO Rho GTPase activating protein 2	ENSMUSG00000026425	0	0	1	0	0	0	0	0	0	chr1	-	131527361	131527233	0	0
Srgap2	e2.0	1769	2424	-1.09145	0.484682	chr1:131285251-131527361	SLIT-ROBO Rho GTPase activating protein 2	ENSMUSG00000026425	0	0	1	0	0	0	0	0	0	chr1	-	131525593	131524938	0	0
Srgap2	e3.0	90495	90687	-1.12669	0.294124	chr1:131285251-131527361	SLIT-ROBO Rho GTPase activating protein 2	ENSMUSG00000026425	0	0	1	0	0	0	0	0	0	chr1	-	131436867	131436675	0	1
Srgap2	e4.0	115400	115562	-1.15201	0.365741	chr1:131285251-131527361	SLIT-ROBO Rho GTPase activating protein 2	ENSMUSG00000026425	0	0	1	0	0	0	0	0	0	chr1	-	131411962	131411800	0	1
Srgap2	e5.0	163298	163360	-1.10914	0.246928	chr1:131285251-131527361	SLIT-ROBO Rho GTPase activating protein 2	ENSMUSG00000026425	0	0	1	0	0	0	0	0	0	chr1	-	131364064	131364002	0	1
Srgap2	e6.0	170457	170672	-1.04012	0.746839	chr1:131285251-131527361	SLIT-ROBO Rho GTPase activating protein 2	ENSMUSG00000026425	1	0	1	0	0	0	0	0	0	chr1	-	131356905	131356690	0	0
Srgap2	e7.0	171723	171851	1.07272	0.605513	chr1:131285251-131527361	SLIT-ROBO Rho GTPase activating protein 2	ENSMUSG00000026425	1	0	1	0	0	0	0	0	0	chr1	-	131355639	131355511	0	0
Srgap2	e8.0	177686	177910	1.00255	0.983539	chr1:131285251-131527361	SLIT-ROBO Rho GTPase activating protein 2	ENSMUSG00000026425	1	0	1	0	0	0	0	0	0	chr1	-	131349676	131349452	0	0
Srgap2	e9.0	181499	181600	1.01202	0.830792	chr1:131285251-131527361	SLIT-ROBO Rho GTPase activating protein 2	ENSMUSG00000026425	1	0	1	0	0	0	0	0	0	chr1	-	131345863	131345762	0	0
Srgap2	e10.0	182816	183013	-1.0031	0.977267	chr1:131285251-131527361	SLIT-ROBO Rho GTPase activating protein 2	ENSMUSG00000026425	1	0	1	0	0	0	0	0	0	chr1	-	131344546	131344349	0	0
Srgap2	e11.0	190888	190972	-1.11749	0.553058	chr1:131285251-131527361	SLIT-ROBO Rho GTPase activating protein 2	ENSMUSG00000026425	1	0	1	0	0	0	0	0	0	chr1	-	131336474	131336390	0	0
Srgap2	e12.0	193478	193505	-1.16438	0.391115	chr1:131285251-131527361	SLIT-ROBO Rho GTPase activating protein 2	ENSMUSG00000026425	1	0	1	0	0	0	0	0	0	chr1	-	131333884	131333857	0	0
Srgap2	e14.0	195221	195245	-1.21583	0.301431	chr1:131285251-131527361	SLIT-ROBO Rho GTPase activating protein 2	ENSMUSG00000026425	1	0	1	0	0	0	0	0	1	chr1	-	131332141	131332117	1	0
Srgap2	e17.0	202214	202274	-1.19711	0.283322	chr1:131285251-131527361	SLIT-ROBO Rho GTPase activating protein 2	ENSMUSG00000026425	1	0	1	0	0	0	0	0	0	chr1	-	131325148	131325088	0	1
Srgap2	e18.0	206850	206927	-1.10939	0.359598	chr1:131285251-131527361	SLIT-ROBO Rho GTPase activating protein 2	ENSMUSG00000026425	1	0	1	0	0	0	0	0	0	chr1	-	131320512	131320435	0	1
Srgap2	e19.0	207703	207837	1.01278	0.814269	chr1:131285251-131527361	SLIT-ROBO Rho GTPase activating protein 2	ENSMUSG00000026425	1	0	1	0	0	0	0	0	0	chr1	-	131319659	131319525	0	1
Srgap2	e21.0	210128	210233	1.04098	0.657345	chr1:131285251-131527361	SLIT-ROBO Rho GTPase activating protein 2	ENSMUSG00000026425	1	0	1	0	0	0	0	0	0	chr1	-	131317234	131317129	0	1
Tmcc2	e1.0	1	410	1.03267	0.381313	chr1:132356316-132391386	transmembrane and coiled-coil domains 2	---	0	0	1	0	0	0	0	0	0	chr1	-	132391386	132390977	0	0
Tmcc2	e2.0	1067	1485	1.04966	0.743365	chr1:132356316-132391386	transmembrane and coiled-coil domains 2	---	0	0	1	0	0	0	0	0	0	chr1	-	132390320	132389902	0	0
Tmcc2	e3.0	10206	10730	-1.00813	0.892621	chr1:132356316-132391386	transmembrane and coiled-coil domains 2	---	0	0	1	0	0	0	0	0	0	chr1	-	132381181	132380657	0	0
Nfasc	e1.0	1	130	1.35577	0.167738	chr1:132564691-132741800	neurofascin	---	0	0	1	0	0	0	0	0	0	chr1	-	132741800	132741671	0	0
Nfasc	e3.0	76214	76322	-1.01668	0.94259	chr1:132564691-132741800	neurofascin	---	0	0	1	0	0	1	0	0	0	chr1	-	132665587	132665479	0	1
Nfasc	e4.0	98943	99123	1.06347	0.749613	chr1:132564691-132741800	neurofascin	---	0	0	1	0	0	0	0	0	0	chr1	-	132642858	132642678	0	1
Nfasc	e5.0	103920	103937	1.28656	0.204577	chr1:132564691-132741800	neurofascin	---	0	0	1	0	0	1	0	0	0	chr1	-	132637881	132637864	1	0
Nfasc	e6.0	104710	104815	-1.09541	0.473406	chr1:132564691-132741800	neurofascin	---	0	0	1	0	0	0	0	0	0	chr1	-	132637091	132636986	0	1
Nfasc	e7.0	106981	107177	-1.0083	0.944588	chr1:132564691-132741800	neurofascin	---	0	0	1	0	0	0	0	0	0	chr1	-	132634820	132634624	0	1
Nfasc	e8.0	107511	107633	1.32406	0.114871	chr1:132564691-132741800	neurofascin	---	0	0	1	0	0	0	0	0	0	chr1	-	132634290	132634168	0	1
Nfasc	e9.0	109946	110116	1.20864	0.27515	chr1:132564691-132741800	neurofascin	---	0	0	1	0	0	0	0	0	0	chr1	-	132631855	132631685	0	1
Nfasc	e11.0	120178	120289	-1.01537	0.906684	chr1:132564691-132741800	neurofascin	---	0	0	1	0	0	0	0	0	0	chr1	-	132621623	132621512	0	2
Nfasc	e13.0	122281	122412	1.07267	0.411706	chr1:132564691-132741800	neurofascin	---	0	0	1	0	0	0	0	0	0	chr1	-	132619520	132619389	0	2
Nfasc	e15.0	130128	130271	1.10548	0.389086	chr1:132564691-132741800	neurofascin	---	1	0	1	0	0	0	0	0	0	chr1	-	132611673	132611530	0	1
Nfasc	e16.0	130915	131026	-1.06906	0.645165	chr1:132564691-132741800	neurofascin	---	1	0	1	0	0	0	0	0	0	chr1	-	132610886	132610775	0	1
Nfasc	e17.0	131324	131490	1.21047	0.0872846	chr1:132564691-132741800	neurofascin	---	1	0	1	0	0	0	0	0	0	chr1	-	132610477	132610311	0	1
Nfasc	e18.0	131897	132044	1.35485	0.137546	chr1:132564691-132741800	neurofascin	---	1	0	1	0	0	0	0	0	0	chr1	-	132609904	132609757	0	1
Nfasc	e19.0	133294	133418	1.31514	0.16601	chr1:132564691-132741800	neurofascin	---	1	0	1	0	0	0	0	0	0	chr1	-	132608507	132608383	0	1
Nfasc	e20.0	134754	134798	1.08065	0.664568	chr1:132564691-132741800	neurofascin	---	1	0	1	0	0	1	0	0	0	chr1	-	132607047	132607003	0	0
Nfasc	e21.0	136216	136317	1.35795	0.141337	chr1:132564691-132741800	neurofascin	---	1	0	1	0	0	0	0	0	0	chr1	-	132605585	132605484	0	1
Nfasc	e22.0	136563	136760	1.19185	0.358349	chr1:132564691-132741800	neurofascin	---	1	0	1	0	0	0	0	0	0	chr1	-	132605238	132605041	0	1
Nfasc	e23.0	137933	138003	-1.19151	0.435273	chr1:132564691-132741800	neurofascin	---	1	0	1	0	0	0	0	0	0	chr1	-	132603868	132603798	0	1
Nfasc	e28.0	146144	146317	-1.01903	0.910759	chr1:132564691-132741800	neurofascin	---	1	0	1	0	0	0	0	0	0	chr1	-	132595657	132595484	0	1
Adora1	e1.0	1	233	1.14683	0.516282	chr1:134199217-134235460	adenosine A1 receptor	---	0	0	1	0	0	0	0	0	0	chr1	-	134235460	134235228	0	0
Ppfia4	e1.0	1	124	-1.1689	0.484544	chr1:134296783-134344716	protein tyrosine phosphatase, receptor type, f polypeptide (PTPRF), interacting protein (liprin), alpha 4	ENSMUSG00000026458	0	0	1	0	0	0	0	0	0	chr1	-	134344716	134344593	0	0
Ppfia4	e2.0	11789	12427	-1.01625	0.800887	chr1:134296783-134344716	protein tyrosine phosphatase, receptor type, f polypeptide (PTPRF), interacting protein (liprin), alpha 4	ENSMUSG00000026458	0	0	1	0	0	0	0	0	0	chr1	-	134332928	134332290	0	0
Ppfia4	e3.0	15470	15571	-1.15149	0.142574	chr1:134296783-134344716	protein tyrosine phosphatase, receptor type, f polypeptide (PTPRF), interacting protein (liprin), alpha 4	ENSMUSG00000026458	0	0	1	0	0	0	0	0	0	chr1	-	134329247	134329146	0	1
Ppfia4	e4.0	15909	16073	1.0253	0.752094	chr1:134296783-134344716	protein tyrosine phosphatase, receptor type, f polypeptide (PTPRF), interacting protein (liprin), alpha 4	ENSMUSG00000026458	0	0	1	0	0	0	0	0	0	chr1	-	134328808	134328644	0	1
Ppfia4	e5.0	16350	16424	-1.00766	0.953601	chr1:134296783-134344716	protein tyrosine phosphatase, receptor type, f polypeptide (PTPRF), interacting protein (liprin), alpha 4	ENSMUSG00000026458	0	0	1	0	0	0	0	0	0	chr1	-	134328367	134328293	0	1
Ppfia4	e6.0	16628	16717	1.01962	0.894305	chr1:134296783-134344716	protein tyrosine phosphatase, receptor type, f polypeptide (PTPRF), interacting protein (liprin), alpha 4	ENSMUSG00000026458	0	0	1	0	0	0	0	0	0	chr1	-	134328089	134328000	0	1
Ppfia4	e8.0	17755	17901	-1.14552	0.236979	chr1:134296783-134344716	protein tyrosine phosphatase, receptor type, f polypeptide (PTPRF), interacting protein (liprin), alpha 4	ENSMUSG00000026458	0	0	1	0	0	0	0	0	0	chr1	-	134326962	134326816	0	1
Ppfia4	e9.0	18099	18237	-1.06155	0.350469	chr1:134296783-134344716	protein tyrosine phosphatase, receptor type, f polypeptide (PTPRF), interacting protein (liprin), alpha 4	ENSMUSG00000026458	0	0	1	0	0	0	0	0	0	chr1	-	134326618	134326480	0	1
Ppfia4	e10.0	20129	20206	-1.16324	0.104888	chr1:134296783-134344716	protein tyrosine phosphatase, receptor type, f polypeptide (PTPRF), interacting protein (liprin), alpha 4	ENSMUSG00000026458	0	0	1	0	0	0	0	0	0	chr1	-	134324588	134324511	0	1
Ppfia4	e11.0	20507	20638	-1.18485	0.0705773	chr1:134296783-134344716	protein tyrosine phosphatase, receptor type, f polypeptide (PTPRF), interacting protein (liprin), alpha 4	ENSMUSG00000026458	0	0	1	0	0	0	0	0	0	chr1	-	134324210	134324079	0	1
Ppfia4	e12.0	21624	21715	-1.06643	0.397902	chr1:134296783-134344716	protein tyrosine phosphatase, receptor type, f polypeptide (PTPRF), interacting protein (liprin), alpha 4	ENSMUSG00000026458	0	0	1	0	0	0	0	0	0	chr1	-	134323093	134323002	0	1
Ppfia4	e13.0	23548	23656	-1.15763	0.174677	chr1:134296783-134344716	protein tyrosine phosphatase, receptor type, f polypeptide (PTPRF), interacting protein (liprin), alpha 4	ENSMUSG00000026458	0	0	1	0	0	0	0	0	0	chr1	-	134321169	134321061	0	1
Ppfia4	e14.0	25294	25502	-1.12289	0.369079	chr1:134296783-134344716	protein tyrosine phosphatase, receptor type, f polypeptide (PTPRF), interacting protein (liprin), alpha 4	ENSMUSG00000026458	0	0	1	0	0	0	0	0	0	chr1	-	134319423	134319215	0	1
Ppfia4	e15.0	26669	26909	-1.1414	0.0435835	chr1:134296783-134344716	protein tyrosine phosphatase, receptor type, f polypeptide (PTPRF), interacting protein (liprin), alpha 4	ENSMUSG00000026458	0	0	1	0	0	0	0	0	0	chr1	-	134318048	134317808	0	1
Ppfia4	e16.0	27244	27279	-1.12257	0.271462	chr1:134296783-134344716	protein tyrosine phosphatase, receptor type, f polypeptide (PTPRF), interacting protein (liprin), alpha 4	ENSMUSG00000026458	0	0	1	0	0	0	0	0	0	chr1	-	134317473	134317438	0	1
Ppfia4	e17.0	27521	27654	-1.20829	0.08417	chr1:134296783-134344716	protein tyrosine phosphatase, receptor type, f polypeptide (PTPRF), interacting protein (liprin), alpha 4	ENSMUSG00000026458	0	0	1	0	0	0	0	0	0	chr1	-	134317196	134317063	0	1
Ppfia4	e18.0	27939	28102	-1.15544	0.142077	chr1:134296783-134344716	protein tyrosine phosphatase, receptor type, f polypeptide (PTPRF), interacting protein (liprin), alpha 4	ENSMUSG00000026458	0	0	1	0	0	0	0	0	0	chr1	-	134316778	134316615	0	1
Ppfia4	e19.0	30994	31087	-1.06446	0.648383	chr1:134296783-134344716	protein tyrosine phosphatase, receptor type, f polypeptide (PTPRF), interacting protein (liprin), alpha 4	ENSMUSG00000026458	0	0	1	0	0	0	0	0	0	chr1	-	134313723	134313630	0	1
Ppfia4	e20.0	31549	31630	-1.17346	0.20257	chr1:134296783-134344716	protein tyrosine phosphatase, receptor type, f polypeptide (PTPRF), interacting protein (liprin), alpha 4	ENSMUSG00000026458	0	0	1	0	0	0	0	0	0	chr1	-	134313168	134313087	0	1
Ppfia4	e21.0	31981	32181	-1.10564	0.254452	chr1:134296783-134344716	protein tyrosine phosphatase, receptor type, f polypeptide (PTPRF), interacting protein (liprin), alpha 4	ENSMUSG00000026458	0	0	1	0	0	0	0	0	0	chr1	-	134312736	134312536	0	1
Ppfia4	e22.0	32598	32660	-1.13218	0.106267	chr1:134296783-134344716	protein tyrosine phosphatase, receptor type, f polypeptide (PTPRF), interacting protein (liprin), alpha 4	ENSMUSG00000026458	0	0	1	0	0	0	0	0	0	chr1	-	134312119	134312057	0	1
Ppfia4	e23.0	33162	33188	-1.06984	0.37414	chr1:134296783-134344716	protein tyrosine phosphatase, receptor type, f polypeptide (PTPRF), interacting protein (liprin), alpha 4	ENSMUSG00000026458	0	0	1	0	0	1	0	0	0	chr1	-	134311555	134311529	1	1
Ppfia4	e24.0	34966	35141	-1.13105	0.0888287	chr1:134296783-134344716	protein tyrosine phosphatase, receptor type, f polypeptide (PTPRF), interacting protein (liprin), alpha 4	ENSMUSG00000026458	0	0	1	0	0	0	0	0	0	chr1	-	134309751	134309576	0	1
Rnpep	e1.0	1	527	-1.20912	0.563185	chr1:135262699-135284088	arginyl aminopeptidase (aminopeptidase B)	---	0	0	1	0	0	0	0	0	0	chr1	-	135284088	135283562	0	0
Shisa4	e1.0	1	193	-1.04085	0.866455	chr1:135371060-135375081	shisa family member 4	ENSMUSG00000041889	0	0	1	0	0	0	0	0	0	chr1	-	135375081	135374889	0	0
Shisa4	e2.0	533	704	-1.01152	0.769621	chr1:135371060-135375081	shisa family member 4	ENSMUSG00000041889	0	0	1	0	0	0	0	0	0	chr1	-	135374549	135374378	0	1
Lhx9	e2.0	333	404	1.061	0.893146	chr1:138825186-138847579	LIM homeobox protein 9	---	0	0	1	0	0	0	0	0	0	chr1	-	138847247	138847176	0	0
Lhx9	e3.0	5654	5772	1.26606	0.461326	chr1:138825186-138847579	LIM homeobox protein 9	---	0	0	1	0	0	0	0	0	0	chr1	-	138841926	138841808	0	2
Lhx9	e4.0	7505	7707	1.26978	0.347233	chr1:138825186-138847579	LIM homeobox protein 9	---	0	0	1	0	0	0	0	0	0	chr1	-	138840075	138839873	0	2
Lhx9	e5.0	8882	9237	-1.44661	0.480338	chr1:138825186-138847579	LIM homeobox protein 9	---	0	0	1	0	0	0	0	0	0	chr1	-	138838698	138838343	0	2
Cdc73	e1.0	1	400	-1.05828	0.570647	chr1:143603276-143702893	cell division cycle 73, Paf1/RNA polymerase II complex component	ENSMUSG00000026361	0	0	1	0	0	0	0	0	0	chr1	-	143702893	143702494	0	0
Cdc73	e2.0	3572	3677	1.033	0.79408	chr1:143603276-143702893	cell division cycle 73, Paf1/RNA polymerase II complex component	ENSMUSG00000026361	0	0	1	0	0	0	0	0	0	chr1	-	143699322	143699217	0	0
Cdc73	e3.0	7432	7501	1.19122	0.155321	chr1:143603276-143702893	cell division cycle 73, Paf1/RNA polymerase II complex component	ENSMUSG00000026361	0	0	1	0	0	0	0	0	0	chr1	-	143695462	143695393	0	0
Cdc73	e4.0	11418	11480	1.04049	0.722454	chr1:143603276-143702893	cell division cycle 73, Paf1/RNA polymerase II complex component	ENSMUSG00000026361	0	0	1	0	0	0	0	0	0	chr1	-	143691476	143691414	0	0
Cdc73	e5.0	11567	11619	-1.02366	0.846138	chr1:143603276-143702893	cell division cycle 73, Paf1/RNA polymerase II complex component	ENSMUSG00000026361	0	0	1	0	0	0	0	0	0	chr1	-	143691327	143691275	0	0
Cdc73	e6.0	16883	16971	1.07071	0.570733	chr1:143603276-143702893	cell division cycle 73, Paf1/RNA polymerase II complex component	ENSMUSG00000026361	0	0	1	0	0	0	0	0	0	chr1	-	143686011	143685923	0	0
Cdc73	e7.0	25039	25255	-1.00604	0.960107	chr1:143603276-143702893	cell division cycle 73, Paf1/RNA polymerase II complex component	ENSMUSG00000026361	0	0	1	0	0	0	0	0	0	chr1	-	143677855	143677639	0	0
Cdc73	e8.0	31466	31564	1.20014	0.275712	chr1:143603276-143702893	cell division cycle 73, Paf1/RNA polymerase II complex component	ENSMUSG00000026361	0	0	1	0	0	0	0	0	0	chr1	-	143671428	143671330	0	0
Cdc73	e9.0	32826	32904	1.36443	0.0693419	chr1:143603276-143702893	cell division cycle 73, Paf1/RNA polymerase II complex component	ENSMUSG00000026361	0	0	1	0	0	0	0	0	0	chr1	-	143670068	143669990	0	0
Cdc73	e10.0	35205	35269	-1.06699	0.416851	chr1:143603276-143702893	cell division cycle 73, Paf1/RNA polymerase II complex component	ENSMUSG00000026361	0	0	1	0	0	0	0	0	0	chr1	-	143667689	143667625	0	0
Swt1	e2.0	4852	4950	-1.41775	0.326263	chr1:151367699-151428456	SWT1 RNA endoribonuclease homolog (S. cerevisiae)	ENSMUSG00000052748	1	0	1	0	0	0	0	0	0	chr1	-	151423605	151423507	0	1
Swt1	e3.0	6337	6423	1.47166	0.271178	chr1:151367699-151428456	SWT1 RNA endoribonuclease homolog (S. cerevisiae)	ENSMUSG00000052748	1	0	1	0	0	0	0	0	0	chr1	-	151422120	151422034	0	1
Swt1	e4.0	8274	8357	1.14336	0.670649	chr1:151367699-151428456	SWT1 RNA endoribonuclease homolog (S. cerevisiae)	ENSMUSG00000052748	1	0	1	0	0	0	0	0	0	chr1	-	151420183	151420100	0	1
Swt1	e6.0	16999	17686	1.49247	0.078479	chr1:151367699-151428456	SWT1 RNA endoribonuclease homolog (S. cerevisiae)	ENSMUSG00000052748	1	0	1	0	0	0	0	0	0	chr1	-	151411458	151410771	0	0
Swt1	e7.0	20822	20881	1.64559	0.0387593	chr1:151367699-151428456	SWT1 RNA endoribonuclease homolog (S. cerevisiae)	ENSMUSG00000052748	1	0	1	0	0	0	0	0	0	chr1	-	151407635	151407576	0	0
Swt1	e8.0	22912	23041	1.78786	0.265568	chr1:151367699-151428456	SWT1 RNA endoribonuclease homolog (S. cerevisiae)	ENSMUSG00000052748	1	0	1	0	0	0	0	0	0	chr1	-	151405545	151405416	0	0
Swt1	e9.0	24561	24662	1.34675	0.303516	chr1:151367699-151428456	SWT1 RNA endoribonuclease homolog (S. cerevisiae)	ENSMUSG00000052748	1	0	1	0	0	0	0	0	0	chr1	-	151403896	151403795	0	1
Swt1	e10.0	25314	25502	-1.16226	0.572182	chr1:151367699-151428456	SWT1 RNA endoribonuclease homolog (S. cerevisiae)	ENSMUSG00000052748	1	0	1	0	0	0	0	0	0	chr1	-	151403143	151402955	0	1
Swt1	e11.0	27284	27377	1.11591	0.632709	chr1:151367699-151428456	SWT1 RNA endoribonuclease homolog (S. cerevisiae)	ENSMUSG00000052748	1	0	1	0	0	0	0	0	0	chr1	-	151401173	151401080	0	0
Swt1	e12.0	31106	31251	1.08476	0.812295	chr1:151367699-151428456	SWT1 RNA endoribonuclease homolog (S. cerevisiae)	ENSMUSG00000052748	1	0	1	0	0	0	0	0	0	chr1	-	151397351	151397206	0	0
Swt1	e13.0	33685	33848	1.0603	0.891182	chr1:151367699-151428456	SWT1 RNA endoribonuclease homolog (S. cerevisiae)	ENSMUSG00000052748	1	0	1	0	0	0	0	0	0	chr1	-	151394772	151394609	0	0
Swt1	e14.0	36883	37021	-1.48315	0.2442	chr1:151367699-151428456	SWT1 RNA endoribonuclease homolog (S. cerevisiae)	ENSMUSG00000052748	1	0	1	0	0	0	0	0	0	chr1	-	151391574	151391436	0	0
Rnf2	e1.0	1	273	-1.14593	0.551367	chr1:151469398-151500991	ring finger protein 2	---	0	0	1	0	0	0	0	0	0	chr1	-	151500991	151500719	0	0
Rgl1	e1.0	1	399	1.0965	0.58992	chr1:152516762-152766305	ral guanine nucleotide dissociation stimulator,-like 1	---	0	0	1	0	0	0	0	0	0	chr1	-	152766305	152765907	0	0
Rgl1	e3.0	91283	91446	-1.16776	0.0376334	chr1:152516762-152766305	ral guanine nucleotide dissociation stimulator,-like 1	---	0	0	1	0	0	0	0	0	0	chr1	-	152675023	152674860	0	0
Rgl1	e5.0	142378	142488	1.07779	0.653222	chr1:152516762-152766305	ral guanine nucleotide dissociation stimulator,-like 1	---	0	0	1	0	0	1	0	0	0	chr1	-	152623928	152623818	0	1
Rgl1	e6.0	179691	179899	-1.16548	0.12132	chr1:152516762-152766305	ral guanine nucleotide dissociation stimulator,-like 1	---	0	0	1	0	0	0	0	0	0	chr1	-	152586615	152586407	0	2
Rgl1	e7.0	194631	194708	-1.02006	0.89153	chr1:152516762-152766305	ral guanine nucleotide dissociation stimulator,-like 1	---	0	0	1	0	0	0	0	0	0	chr1	-	152571675	152571598	0	2
Rgl1	e8.0	208719	208903	-1.07979	0.659745	chr1:152516762-152766305	ral guanine nucleotide dissociation stimulator,-like 1	---	0	0	1	0	0	0	0	0	0	chr1	-	152557587	152557403	0	2
Rgl1	e9.0	211886	212010	1.07568	0.247872	chr1:152516762-152766305	ral guanine nucleotide dissociation stimulator,-like 1	---	0	0	1	0	0	0	0	0	0	chr1	-	152554420	152554296	0	2
Rgl1	e10.0	213670	213885	1.05173	0.515518	chr1:152516762-152766305	ral guanine nucleotide dissociation stimulator,-like 1	---	0	0	1	0	0	0	0	0	0	chr1	-	152552636	152552421	0	2
Rgl1	e11.0	217136	217239	-1.10775	0.448786	chr1:152516762-152766305	ral guanine nucleotide dissociation stimulator,-like 1	---	1	0	1	0	0	0	0	0	0	chr1	-	152549170	152549067	0	2
Rgl1	e12.0	221871	221955	-1.12455	0.388953	chr1:152516762-152766305	ral guanine nucleotide dissociation stimulator,-like 1	---	1	0	1	0	0	0	0	0	0	chr1	-	152544435	152544351	0	2
Rgl1	e13.0	226280	226369	1.05611	0.334123	chr1:152516762-152766305	ral guanine nucleotide dissociation stimulator,-like 1	---	1	0	1	0	0	0	0	0	0	chr1	-	152540026	152539937	0	2
Rgl1	e14.0	228489	228575	1.00875	0.921929	chr1:152516762-152766305	ral guanine nucleotide dissociation stimulator,-like 1	---	1	0	1	0	0	0	0	0	0	chr1	-	152537817	152537731	0	2
Rgl1	e15.0	230007	230039	1.01732	0.904809	chr1:152516762-152766305	ral guanine nucleotide dissociation stimulator,-like 1	---	1	0	1	0	0	0	0	0	0	chr1	-	152536299	152536267	0	2
Rgl1	e16.0	232679	232800	1.0112	0.890408	chr1:152516762-152766305	ral guanine nucleotide dissociation stimulator,-like 1	---	1	0	1	0	0	0	0	0	0	chr1	-	152533627	152533506	0	2
Rgl1	e17.0	234711	234800	1.02517	0.762022	chr1:152516762-152766305	ral guanine nucleotide dissociation stimulator,-like 1	---	1	0	1	0	0	0	0	0	0	chr1	-	152531595	152531506	0	2
Rgl1	e18.0	237847	238033	1.02664	0.672056	chr1:152516762-152766305	ral guanine nucleotide dissociation stimulator,-like 1	---	1	0	1	0	0	0	0	0	0	chr1	-	152528459	152528273	0	2
Dhx9	e1.0	1	129	1.03694	0.752636	chr1:153455758-153487661	DEAH (Asp-Glu-Ala-His) box polypeptide 9	---	0	0	1	0	0	0	0	0	0	chr1	-	153487661	153487533	0	0
Dhx9	e2.0	3790	3922	1.06497	0.564751	chr1:153455758-153487661	DEAH (Asp-Glu-Ala-His) box polypeptide 9	---	0	0	1	0	0	0	0	0	0	chr1	-	153483872	153483740	0	1
Dhx9	e3.0	4780	4920	-1.10007	0.380605	chr1:153455758-153487661	DEAH (Asp-Glu-Ala-His) box polypeptide 9	---	0	0	1	0	0	0	0	0	0	chr1	-	153482882	153482742	0	1
Dhx9	e4.0	6413	6530	-1.0004	0.99783	chr1:153455758-153487661	DEAH (Asp-Glu-Ala-His) box polypeptide 9	---	1	0	1	0	0	0	0	0	0	chr1	-	153481249	153481132	0	0
Cacna1e	e5.0	183122	183227	1.16206	0.607877	chr1:154392513-154884501	calcium channel, voltage-dependent, R type, alpha 1E subunit	ENSMUSG00000004110	0	0	1	0	0	0	0	0	0	chr1	-	154701380	154701275	0	1
Cacna1e	e6.0	183992	184131	-1.0776	0.86893	chr1:154392513-154884501	calcium channel, voltage-dependent, R type, alpha 1E subunit	ENSMUSG00000004110	0	0	1	0	0	0	0	0	0	chr1	-	154700510	154700371	0	1
Cacna1e	e7.0	248642	248745	1.83552	0.265038	chr1:154392513-154884501	calcium channel, voltage-dependent, R type, alpha 1E subunit	ENSMUSG00000004110	1	0	1	0	0	0	0	0	0	chr1	-	154635860	154635757	0	0
Cacna1e	e8.0	249510	249662	1.27062	0.543871	chr1:154392513-154884501	calcium channel, voltage-dependent, R type, alpha 1E subunit	ENSMUSG00000004110	1	0	1	0	0	0	0	0	0	chr1	-	154634992	154634840	0	0
Cacna1e	e9.0	250767	250948	-1.41403	0.369513	chr1:154392513-154884501	calcium channel, voltage-dependent, R type, alpha 1E subunit	ENSMUSG00000004110	1	0	1	0	0	0	0	0	0	chr1	-	154633735	154633554	0	0
Cacna1e	e10.0	322668	322771	-1.06636	0.83396	chr1:154392513-154884501	calcium channel, voltage-dependent, R type, alpha 1E subunit	ENSMUSG00000004110	1	0	1	0	0	0	0	0	0	chr1	-	154561834	154561731	0	0
Cacna1e	e11.0	391085	391200	-1.11718	0.820139	chr1:154392513-154884501	calcium channel, voltage-dependent, R type, alpha 1E subunit	ENSMUSG00000004110	1	0	1	0	0	0	0	0	0	chr1	-	154493417	154493302	0	0
Cacna1e	e12.0	395664	395717	-1.22072	0.674312	chr1:154392513-154884501	calcium channel, voltage-dependent, R type, alpha 1E subunit	ENSMUSG00000004110	1	0	1	0	0	0	0	0	0	chr1	-	154488838	154488785	0	0
Cacna1e	e13.0	396369	396458	1.36259	0.611808	chr1:154392513-154884501	calcium channel, voltage-dependent, R type, alpha 1E subunit	ENSMUSG00000004110	1	0	1	0	0	0	0	0	0	chr1	-	154488133	154488044	0	0
Cacna1e	e14.0	397795	398004	1.00052	0.998973	chr1:154392513-154884501	calcium channel, voltage-dependent, R type, alpha 1E subunit	ENSMUSG00000004110	1	0	1	0	0	0	0	0	0	chr1	-	154486707	154486498	0	0
Cacna1e	e15.0	398727	398839	-1.24604	0.72207	chr1:154392513-154884501	calcium channel, voltage-dependent, R type, alpha 1E subunit	ENSMUSG00000004110	1	0	1	0	0	1	0	0	0	chr1	-	154485775	154485663	0	0
Cacna1e	e16.0	400873	400985	-1.1365	0.762766	chr1:154392513-154884501	calcium channel, voltage-dependent, R type, alpha 1E subunit	ENSMUSG00000004110	1	0	1	0	0	1	0	0	0	chr1	-	154483629	154483517	0	0
Cacna1e	e17.0	401296	401427	-2.28083	0.120234	chr1:154392513-154884501	calcium channel, voltage-dependent, R type, alpha 1E subunit	ENSMUSG00000004110	1	0	1	0	0	1	0	0	0	chr1	-	154483206	154483075	0	0
Cacna1e	e18.0	401879	401951	-1.34252	0.683295	chr1:154392513-154884501	calcium channel, voltage-dependent, R type, alpha 1E subunit	ENSMUSG00000004110	1	0	1	0	0	0	0	0	0	chr1	-	154482623	154482551	0	0
Cacna1e	e19.0	402833	402950	-1.95177	0.134827	chr1:154392513-154884501	calcium channel, voltage-dependent, R type, alpha 1E subunit	ENSMUSG00000004110	1	0	1	0	0	0	0	0	0	chr1	-	154481669	154481552	0	0
Cacna1e	e20.0	405184	405251	-1.41812	0.394616	chr1:154392513-154884501	calcium channel, voltage-dependent, R type, alpha 1E subunit	ENSMUSG00000004110	1	0	1	0	0	0	0	0	0	chr1	-	154479318	154479251	0	0
Cacna1e	e21.0	406639	406736	1.52522	0.501451	chr1:154392513-154884501	calcium channel, voltage-dependent, R type, alpha 1E subunit	ENSMUSG00000004110	1	0	1	0	0	0	0	0	0	chr1	-	154477863	154477766	0	0
BC034090	e2.0	2207	3108	1.10243	0.636201	chr1:155212471-155244532	cDNA sequence BC034090	---	0	0	1	0	0	0	0	0	0	chr1	-	155242326	155241425	0	0
BC034090	e3.0	3734	3797	-1.0593	0.881943	chr1:155212471-155244532	cDNA sequence BC034090	---	0	0	1	0	0	0	0	0	0	chr1	-	155240799	155240736	0	0
BC034090	e4.0	11944	12087	-1.63788	0.0866112	chr1:155212471-155244532	cDNA sequence BC034090	---	0	0	1	0	0	0	0	0	0	chr1	-	155232589	155232446	0	1
BC034090	e5.0	18085	19622	-1.10424	0.0215081	chr1:155212471-155244532	cDNA sequence BC034090	---	0	0	1	0	0	0	0	0	0	chr1	-	155226448	155224911	0	2
BC034090	e6.0	21102	21258	-1.0592	0.626334	chr1:155212471-155244532	cDNA sequence BC034090	---	0	0	1	0	0	0	0	0	0	chr1	-	155223431	155223275	0	2
BC034090	e7.0	22946	23198	1.18004	0.0995402	chr1:155212471-155244532	cDNA sequence BC034090	---	0	0	1	0	0	0	0	0	0	chr1	-	155221587	155221335	0	2
BC034090	e8.0	26146	26273	1.42699	0.0308188	chr1:155212471-155244532	cDNA sequence BC034090	---	0	0	1	0	0	0	0	0	0	chr1	-	155218387	155218260	0	2
BC034090	e9.0	26967	27151	1.13871	0.447674	chr1:155212471-155244532	cDNA sequence BC034090	---	0	0	1	0	0	0	0	0	0	chr1	-	155217566	155217382	0	2
Xpr1	e1.0	1	280	-1.13309	0.169836	chr1:155274842-155417444	xenotropic and polytropic retrovirus receptor 1	ENSMUSG00000026469	0	0	1	0	0	0	0	0	0	chr1	-	155417444	155417165	0	0
Xpr1	e2.0	32783	32834	1.1538	0.417721	chr1:155274842-155417444	xenotropic and polytropic retrovirus receptor 1	ENSMUSG00000026469	0	0	1	1	0	0	0	0	0	chr1	-	155384662	155384611	0	0
Xpr1	e5.0	85059	85282	1.00245	0.978547	chr1:155274842-155417444	xenotropic and polytropic retrovirus receptor 1	ENSMUSG00000026469	0	0	1	0	0	0	0	0	0	chr1	-	155332386	155332163	0	1
Xpr1	e6.0	86958	87107	-1.10672	0.326589	chr1:155274842-155417444	xenotropic and polytropic retrovirus receptor 1	ENSMUSG00000026469	0	0	1	0	0	0	0	0	0	chr1	-	155330487	155330338	0	1
Xpr1	e7.0	88763	88846	-1.10544	0.292831	chr1:155274842-155417444	xenotropic and polytropic retrovirus receptor 1	ENSMUSG00000026469	0	0	1	0	0	0	0	0	0	chr1	-	155328682	155328599	0	1
Xpr1	e8.0	93050	93131	1.16418	0.0687291	chr1:155274842-155417444	xenotropic and polytropic retrovirus receptor 1	ENSMUSG00000026469	0	0	1	0	0	0	0	0	0	chr1	-	155324395	155324314	0	1
Xpr1	e9.0	104084	104274	-1.05501	0.680233	chr1:155274842-155417444	xenotropic and polytropic retrovirus receptor 1	ENSMUSG00000026469	1	0	1	0	0	0	0	0	0	chr1	-	155313361	155313171	0	1
Xpr1	e10.0	104507	104686	-1.06254	0.488557	chr1:155274842-155417444	xenotropic and polytropic retrovirus receptor 1	ENSMUSG00000026469	1	0	1	0	0	0	0	0	0	chr1	-	155312938	155312759	0	1
Xpr1	e11.0	108323	108494	-1.06243	0.312034	chr1:155274842-155417444	xenotropic and polytropic retrovirus receptor 1	ENSMUSG00000026469	1	0	1	0	0	0	0	0	0	chr1	-	155309122	155308951	0	1
Xpr1	e12.0	109629	109823	-1.0144	0.85782	chr1:155274842-155417444	xenotropic and polytropic retrovirus receptor 1	ENSMUSG00000026469	1	0	1	0	0	0	0	0	0	chr1	-	155307816	155307622	0	1
Xpr1	e13.0	124170	124336	1.08475	0.341724	chr1:155274842-155417444	xenotropic and polytropic retrovirus receptor 1	ENSMUSG00000026469	1	0	1	0	0	0	0	0	0	chr1	-	155293275	155293109	0	1
Qsox1	e1.0	1	374	-1.05528	0.627672	chr1:155776029-155812899	quiescin Q6 sulfhydryl oxidase 1	---	0	0	1	0	0	0	0	0	0	chr1	-	155812899	155812526	0	0
Qsox1	e2.0	9103	9203	-1.19756	0.230812	chr1:155776029-155812899	quiescin Q6 sulfhydryl oxidase 1	---	0	0	1	0	0	0	0	0	0	chr1	-	155803797	155803697	0	2
Qsox1	e3.0	17504	17549	-1.05477	0.699605	chr1:155776029-155812899	quiescin Q6 sulfhydryl oxidase 1	---	1	0	1	0	0	0	0	0	0	chr1	-	155795396	155795351	0	1
Qsox1	e4.0	18252	18354	1.0056	0.956963	chr1:155776029-155812899	quiescin Q6 sulfhydryl oxidase 1	---	1	0	1	0	0	0	0	0	0	chr1	-	155794648	155794546	0	1
Qsox1	e5.0	20616	20706	1.02518	0.864689	chr1:155776029-155812899	quiescin Q6 sulfhydryl oxidase 1	---	1	0	1	0	0	0	0	0	0	chr1	-	155792284	155792194	0	1
Qsox1	e6.0	21774	21919	-1.0551	0.534278	chr1:155776029-155812899	quiescin Q6 sulfhydryl oxidase 1	---	1	0	1	0	0	0	0	0	0	chr1	-	155791126	155790981	0	1
Qsox1	e7.0	23468	23602	1.02384	0.730129	chr1:155776029-155812899	quiescin Q6 sulfhydryl oxidase 1	---	1	0	1	0	0	0	0	0	0	chr1	-	155789432	155789298	0	1
Qsox1	e8.0	25977	26106	1.2073	0.0290162	chr1:155776029-155812899	quiescin Q6 sulfhydryl oxidase 1	---	1	0	1	0	0	0	0	0	0	chr1	-	155786923	155786794	0	1
Qsox1	e9.0	29375	29497	-1.0077	0.938261	chr1:155776029-155812899	quiescin Q6 sulfhydryl oxidase 1	---	1	0	1	0	0	0	0	0	0	chr1	-	155783525	155783403	0	1
Qsox1	e10.0	30228	30375	-1.08295	0.705446	chr1:155776029-155812899	quiescin Q6 sulfhydryl oxidase 1	---	1	0	1	0	0	0	0	0	0	chr1	-	155782672	155782525	0	1
Qsox1	e11.0	31446	31625	-1.00436	0.976954	chr1:155776029-155812899	quiescin Q6 sulfhydryl oxidase 1	---	1	0	1	0	0	0	0	0	0	chr1	-	155781454	155781275	0	1
Qsox1	e12.0	32962	33182	-1.05095	0.295314	chr1:155776029-155812899	quiescin Q6 sulfhydryl oxidase 1	---	1	0	1	0	0	0	0	0	0	chr1	-	155779938	155779718	0	1
Tor1aip1	e1.0	1	723	1.0612	0.594021	chr1:156004599-156036480	torsin A interacting protein 1	---	0	0	1	0	0	0	0	0	0	chr1	-	156036480	156035758	0	0
Ralgps2	e5.0	37737	37841	-1.14045	0.516542	chr1:156804166-156939626	Ral GEF with PH domain and SH3 binding motif 2	---	0	0	1	0	0	1	0	0	0	chr1	-	156901890	156901786	0	1
Ralgps2	e6.0	38991	39041	-1.46109	0.0479069	chr1:156804166-156939626	Ral GEF with PH domain and SH3 binding motif 2	---	0	0	1	0	0	0	0	0	0	chr1	-	156900636	156900586	0	1
Ralgps2	e7.0	46615	46719	1.55264	0.201516	chr1:156804166-156939626	Ral GEF with PH domain and SH3 binding motif 2	---	0	0	1	0	0	1	0	0	0	chr1	-	156893012	156892908	0	0
Ralgps2	e8.0	51597	51680	-1.22079	0.291505	chr1:156804166-156939626	Ral GEF with PH domain and SH3 binding motif 2	---	0	0	1	0	0	0	0	0	0	chr1	-	156888030	156887947	0	1
Ralgps2	e9.0	52447	52536	1.02841	0.878609	chr1:156804166-156939626	Ral GEF with PH domain and SH3 binding motif 2	---	0	0	1	0	0	0	0	0	0	chr1	-	156887180	156887091	0	1
Ralgps2	e10.0	55002	55094	-1.2318	0.116423	chr1:156804166-156939626	Ral GEF with PH domain and SH3 binding motif 2	---	0	0	1	0	0	0	0	0	0	chr1	-	156884625	156884533	0	1
Ralgps2	e11.0	70060	70186	1.08936	0.394126	chr1:156804166-156939626	Ral GEF with PH domain and SH3 binding motif 2	---	0	0	1	0	0	0	0	0	0	chr1	-	156869567	156869441	0	1
Ralgps2	e12.0	106595	106732	1.28328	0.0968178	chr1:156804166-156939626	Ral GEF with PH domain and SH3 binding motif 2	---	0	0	1	0	0	0	0	0	0	chr1	-	156833032	156832895	0	1
Ralgps2	e13.0	106872	106962	-1.06907	0.676838	chr1:156804166-156939626	Ral GEF with PH domain and SH3 binding motif 2	---	0	0	1	0	0	0	0	0	0	chr1	-	156832755	156832665	0	1
Ralgps2	e14.0	109175	109242	-1.14044	0.504255	chr1:156804166-156939626	Ral GEF with PH domain and SH3 binding motif 2	---	0	0	1	0	0	0	0	0	0	chr1	-	156830452	156830385	0	2
Ralgps2	e15.0	110499	110655	-1.10091	0.45725	chr1:156804166-156939626	Ral GEF with PH domain and SH3 binding motif 2	---	0	0	1	0	0	0	0	0	0	chr1	-	156829128	156828972	0	2
Ralgps2	e16.0	111336	111487	-1.00204	0.985453	chr1:156804166-156939626	Ral GEF with PH domain and SH3 binding motif 2	---	1	0	1	0	0	0	0	0	0	chr1	-	156828291	156828140	0	1
Ralgps2	e17.0	115582	115636	1.16537	0.295759	chr1:156804166-156939626	Ral GEF with PH domain and SH3 binding motif 2	---	1	0	1	0	0	0	0	0	0	chr1	-	156824045	156823991	0	1
Ralgps2	e19.0	119709	119814	1.10192	0.281596	chr1:156804166-156939626	Ral GEF with PH domain and SH3 binding motif 2	---	1	0	1	0	0	0	0	0	0	chr1	-	156819918	156819813	0	1
Ralgps2	e20.0	121794	121886	1.05387	0.537429	chr1:156804166-156939626	Ral GEF with PH domain and SH3 binding motif 2	---	1	0	1	0	0	0	0	0	0	chr1	-	156817833	156817741	0	1
Dars2	e1.0	1	670	1.00533	0.952576	chr1:161040601-161070662	aspartyl-tRNA synthetase 2 (mitochondrial)	ENSMUSG00000026709	0	0	1	0	0	0	0	0	0	chr1	-	161070662	161069993	0	0
Dars2	e2.0	1484	1583	1.02874	0.763466	chr1:161040601-161070662	aspartyl-tRNA synthetase 2 (mitochondrial)	ENSMUSG00000026709	0	0	1	0	0	0	0	0	0	chr1	-	161069179	161069080	0	1
Dars2	e3.0	5372	5438	-1.01122	0.933488	chr1:161040601-161070662	aspartyl-tRNA synthetase 2 (mitochondrial)	ENSMUSG00000026709	0	0	1	0	0	0	0	0	0	chr1	-	161065291	161065225	0	1
Dars2	e4.0	7315	7416	-1.03046	0.856263	chr1:161040601-161070662	aspartyl-tRNA synthetase 2 (mitochondrial)	ENSMUSG00000026709	0	0	1	0	0	0	0	0	0	chr1	-	161063348	161063247	0	1
Dars2	e5.0	7786	7881	1.0488	0.739235	chr1:161040601-161070662	aspartyl-tRNA synthetase 2 (mitochondrial)	ENSMUSG00000026709	0	0	1	0	0	0	0	0	0	chr1	-	161062877	161062782	0	1
Dars2	e6.0	9804	9927	-1.00804	0.915966	chr1:161040601-161070662	aspartyl-tRNA synthetase 2 (mitochondrial)	ENSMUSG00000026709	0	0	1	0	0	0	0	0	0	chr1	-	161060859	161060736	0	1
Dars2	e7.0	10572	10618	-1.04675	0.836619	chr1:161040601-161070662	aspartyl-tRNA synthetase 2 (mitochondrial)	ENSMUSG00000026709	0	0	1	0	0	0	0	0	0	chr1	-	161060091	161060045	0	1
Dars2	e8.0	13110	13216	-1.02616	0.829073	chr1:161040601-161070662	aspartyl-tRNA synthetase 2 (mitochondrial)	ENSMUSG00000026709	0	0	1	0	0	0	0	0	0	chr1	-	161057553	161057447	0	1
Dars2	e9.0	14133	14202	-1.06911	0.40782	chr1:161040601-161070662	aspartyl-tRNA synthetase 2 (mitochondrial)	ENSMUSG00000026709	0	0	1	0	0	0	0	0	0	chr1	-	161056530	161056461	0	1
Dars2	e10.0	16543	16722	-1.04082	0.629252	chr1:161040601-161070662	aspartyl-tRNA synthetase 2 (mitochondrial)	ENSMUSG00000026709	0	0	1	0	0	0	0	0	0	chr1	-	161054120	161053941	0	1
Dars2	e11.0	19225	19332	-1.31264	0.058086	chr1:161040601-161070662	aspartyl-tRNA synthetase 2 (mitochondrial)	ENSMUSG00000026709	0	0	1	0	0	0	0	0	0	chr1	-	161051438	161051331	0	1
Dars2	e12.0	20663	20725	-1.1413	0.423126	chr1:161040601-161070662	aspartyl-tRNA synthetase 2 (mitochondrial)	ENSMUSG00000026709	0	0	1	0	0	1	0	0	0	chr1	-	161050000	161049938	0	1
Klhl20	e1.0	1	117	-1.20521	0.533207	chr1:161088378-161131479	kelch-like 20	ENSMUSG00000026705	0	0	1	0	0	0	0	0	0	chr1	-	161131479	161131363	0	0
Klhl20	e2.0	1028	1091	-1.01475	0.931059	chr1:161088378-161131479	kelch-like 20	ENSMUSG00000026705	0	0	1	0	0	0	0	0	0	chr1	-	161130452	161130389	0	1
Klhl20	e3.0	21685	22258	-1.04759	0.683066	chr1:161088378-161131479	kelch-like 20	ENSMUSG00000026705	0	0	1	0	0	0	0	0	0	chr1	-	161109795	161109222	0	1
Klhl20	e4.0	24615	24773	1.15324	0.0579839	chr1:161088378-161131479	kelch-like 20	ENSMUSG00000026705	1	0	1	0	0	0	0	0	0	chr1	-	161106865	161106707	0	1
Klhl20	e5.0	25985	26079	1.1076	0.260062	chr1:161088378-161131479	kelch-like 20	ENSMUSG00000026705	1	0	1	0	0	0	0	0	0	chr1	-	161105495	161105401	0	1
Suco	e1.0	1	372	-1.35388	0.363524	chr1:161816112-161876682	SUN domain containing ossification factor	ENSMUSG00000040297	0	0	1	0	0	0	0	0	0	chr1	-	161876682	161876311	0	0
Suco	e2.0	12658	12769	-1.69285	0.231598	chr1:161816112-161876682	SUN domain containing ossification factor	ENSMUSG00000040297	0	0	1	0	0	0	0	0	0	chr1	-	161864025	161863914	0	1
Suco	e3.0	14381	14491	1.0193	0.907609	chr1:161816112-161876682	SUN domain containing ossification factor	ENSMUSG00000040297	0	0	1	0	0	0	0	0	0	chr1	-	161862302	161862192	0	1
Suco	e4.0	17179	17333	1.06492	0.710568	chr1:161816112-161876682	SUN domain containing ossification factor	ENSMUSG00000040297	0	0	1	0	0	0	0	0	0	chr1	-	161859504	161859350	0	1
Suco	e5.0	19202	19339	1.19511	0.443749	chr1:161816112-161876682	SUN domain containing ossification factor	ENSMUSG00000040297	0	0	1	0	0	0	0	0	0	chr1	-	161857481	161857344	0	1
Suco	e6.0	19712	19862	1.00915	0.950958	chr1:161816112-161876682	SUN domain containing ossification factor	ENSMUSG00000040297	0	0	1	0	0	0	0	0	0	chr1	-	161856971	161856821	0	1
Suco	e7.0	22845	22968	-1.44121	0.291117	chr1:161816112-161876682	SUN domain containing ossification factor	ENSMUSG00000040297	0	0	1	0	0	0	0	0	0	chr1	-	161853838	161853715	0	1
Suco	e9.0	24341	24408	-1.74506	0.0337862	chr1:161816112-161876682	SUN domain containing ossification factor	ENSMUSG00000040297	0	0	1	0	0	0	0	0	0	chr1	-	161852342	161852275	0	1
Suco	e10.0	27934	28041	1.02191	0.923539	chr1:161816112-161876682	SUN domain containing ossification factor	ENSMUSG00000040297	0	0	1	0	0	0	0	0	0	chr1	-	161848749	161848642	0	1
Suco	e11.0	29373	29478	1.38755	0.247738	chr1:161816112-161876682	SUN domain containing ossification factor	ENSMUSG00000040297	0	0	1	0	0	0	0	0	0	chr1	-	161847310	161847205	0	1
Suco	e12.0	31103	31123	1.24867	0.161845	chr1:161816112-161876682	SUN domain containing ossification factor	ENSMUSG00000040297	0	0	1	0	0	0	0	0	0	chr1	-	161845580	161845560	1	1
Suco	e13.0	31325	31380	-1.03283	0.86213	chr1:161816112-161876682	SUN domain containing ossification factor	ENSMUSG00000040297	0	0	1	0	0	0	0	0	0	chr1	-	161845358	161845303	0	1
Suco	e14.0	31803	31894	1.09428	0.660313	chr1:161816112-161876682	SUN domain containing ossification factor	ENSMUSG00000040297	0	0	1	0	0	0	0	0	0	chr1	-	161844880	161844789	0	1
Suco	e16.0	37861	37929	1.12681	0.698883	chr1:161816112-161876682	SUN domain containing ossification factor	ENSMUSG00000040297	0	0	1	0	0	0	0	0	0	chr1	-	161838822	161838754	0	1
Suco	e17.0	38874	38964	-1.16127	0.458023	chr1:161816112-161876682	SUN domain containing ossification factor	ENSMUSG00000040297	0	0	1	0	0	0	0	0	0	chr1	-	161837809	161837719	0	1
Suco	e18.0	41490	42647	-1.02193	0.785135	chr1:161816112-161876682	SUN domain containing ossification factor	ENSMUSG00000040297	0	0	1	0	0	0	0	0	0	chr1	-	161835193	161834036	0	1
Suco	e19.0	43180	43267	-1.13551	0.335985	chr1:161816112-161876682	SUN domain containing ossification factor	ENSMUSG00000040297	0	0	1	0	0	0	0	0	0	chr1	-	161833503	161833416	0	1
Suco	e20.0	47343	47447	1.0053	0.975133	chr1:161816112-161876682	SUN domain containing ossification factor	ENSMUSG00000040297	0	0	1	0	0	0	0	0	0	chr1	-	161829340	161829236	0	1
Suco	e21.0	48373	48527	1.03314	0.701076	chr1:161816112-161876682	SUN domain containing ossification factor	ENSMUSG00000040297	0	0	1	0	0	0	0	0	0	chr1	-	161828310	161828156	0	1
Suco	e22.0	48935	49026	1.3271	0.0472628	chr1:161816112-161876682	SUN domain containing ossification factor	ENSMUSG00000040297	0	0	1	0	0	0	0	0	0	chr1	-	161827748	161827657	0	1
Suco	e23.0	49286	49383	1.58691	0.169091	chr1:161816112-161876682	SUN domain containing ossification factor	ENSMUSG00000040297	0	0	1	1	0	1	0	0	0	chr1	-	161827397	161827300	0	0
Dnm3	e1.0	1	374	-1.06628	0.524997	chr1:161987304-162478036	dynamin 3	ENSMUSG00000040265	0	0	1	0	0	0	0	0	0	chr1	-	162478036	162477663	0	0
Dnm3	e2.0	70629	70702	-1.10433	0.339673	chr1:161987304-162478036	dynamin 3	ENSMUSG00000040265	0	0	1	0	0	0	0	0	0	chr1	-	162407408	162407335	0	1
Dnm3	e3.0	122528	122677	-1.06314	0.555249	chr1:161987304-162478036	dynamin 3	ENSMUSG00000040265	0	0	1	0	0	0	0	0	0	chr1	-	162355509	162355360	0	1
Dnm3	e4.0	124314	124517	-1.01547	0.884664	chr1:161987304-162478036	dynamin 3	ENSMUSG00000040265	0	0	1	0	0	0	0	0	0	chr1	-	162353723	162353520	0	1
Dnm3	e5.0	156252	156350	1.06356	0.513721	chr1:161987304-162478036	dynamin 3	ENSMUSG00000040265	0	0	1	0	0	0	0	0	0	chr1	-	162321785	162321687	0	1
Dnm3	e6.0	156925	157085	-1.0776	0.46644	chr1:161987304-162478036	dynamin 3	ENSMUSG00000040265	0	0	1	0	0	0	0	0	0	chr1	-	162321112	162320952	0	1
Dnm3	e7.0	159314	159456	1.00176	0.987249	chr1:161987304-162478036	dynamin 3	ENSMUSG00000040265	0	0	1	0	0	0	0	0	0	chr1	-	162318723	162318581	0	1
Dnm3	e8.0	164341	164476	1.1558	0.0720423	chr1:161987304-162478036	dynamin 3	ENSMUSG00000040265	1	0	1	0	0	0	0	0	0	chr1	-	162313696	162313561	0	1
Dnm3	e9.0	166578	166649	1.2431	0.0317495	chr1:161987304-162478036	dynamin 3	ENSMUSG00000040265	1	0	1	0	0	0	0	0	0	chr1	-	162311459	162311388	0	1
Dnm3	e10.0	170036	170169	-1.13899	0.082111	chr1:161987304-162478036	dynamin 3	ENSMUSG00000040265	1	0	1	0	0	0	0	0	0	chr1	-	162308001	162307868	0	1
Dnm3	e11.0	182399	182485	1.04355	0.696487	chr1:161987304-162478036	dynamin 3	ENSMUSG00000040265	1	0	1	0	0	0	0	0	0	chr1	-	162295638	162295552	0	1
Dnm3	e12.0	191970	192040	1.05873	0.513783	chr1:161987304-162478036	dynamin 3	ENSMUSG00000040265	1	0	1	0	0	0	0	0	0	chr1	-	162286067	162285997	0	1
Dnm3	e13.0	203498	203549	1.01531	0.833201	chr1:161987304-162478036	dynamin 3	ENSMUSG00000040265	1	0	1	0	0	0	0	0	0	chr1	-	162274539	162274488	0	1
Dnm3	e14.0	246270	246383	-1.0345	0.692339	chr1:161987304-162478036	dynamin 3	ENSMUSG00000040265	1	0	1	0	0	0	0	0	0	chr1	-	162231767	162231654	0	1
Dnm3	e16.0	343471	343580	-1.0024	0.971036	chr1:161987304-162478036	dynamin 3	ENSMUSG00000040265	1	0	1	0	0	0	0	0	0	chr1	-	162134566	162134457	0	1
Dnm3	e17.0	393893	394005	1.03788	0.706404	chr1:161987304-162478036	dynamin 3	ENSMUSG00000040265	1	0	1	0	0	0	0	0	0	chr1	-	162084144	162084032	0	1
Dnm3	e18.0	458045	458209	1.02747	0.797828	chr1:161987304-162478036	dynamin 3	ENSMUSG00000040265	1	0	1	0	0	0	0	0	0	chr1	-	162019992	162019828	0	1
Dnm3	e19.0	466110	466336	1.0157	0.821173	chr1:161987304-162478036	dynamin 3	ENSMUSG00000040265	1	0	1	0	0	0	0	0	0	chr1	-	162011927	162011701	0	1
Dnm3	e20.0	466933	467169	-1.08369	0.260751	chr1:161987304-162478036	dynamin 3	ENSMUSG00000040265	1	0	1	0	0	0	0	0	0	chr1	-	162011104	162010868	0	1
Tiprl	e1.0	1	231	1.03298	0.835908	chr1:165212286-165236960	TIP41, TOR signalling pathway regulator-like (S. cerevisiae)	ENSMUSG00000040843	0	0	1	0	0	0	0	0	0	chr1	-	165236960	165236730	0	0
Tiprl	e2.0	8514	8693	1.00068	0.993825	chr1:165212286-165236960	TIP41, TOR signalling pathway regulator-like (S. cerevisiae)	ENSMUSG00000040843	0	0	1	0	0	0	0	0	0	chr1	-	165228447	165228268	0	2
Tiprl	e3.0	9357	9456	1.00391	0.942423	chr1:165212286-165236960	TIP41, TOR signalling pathway regulator-like (S. cerevisiae)	ENSMUSG00000040843	0	0	1	0	0	0	0	0	0	chr1	-	165227604	165227505	0	2
Tiprl	e4.0	14301	14432	-1.03371	0.79671	chr1:165212286-165236960	TIP41, TOR signalling pathway regulator-like (S. cerevisiae)	ENSMUSG00000040843	0	0	1	0	0	0	0	0	0	chr1	-	165222660	165222529	0	2
Tiprl	e5.0	16767	16862	1.02382	0.773533	chr1:165212286-165236960	TIP41, TOR signalling pathway regulator-like (S. cerevisiae)	ENSMUSG00000040843	0	0	1	0	0	0	0	0	0	chr1	-	165220194	165220099	0	2
Tiprl	e6.0	19116	19178	1.00832	0.895905	chr1:165212286-165236960	TIP41, TOR signalling pathway regulator-like (S. cerevisiae)	ENSMUSG00000040843	0	0	1	0	0	0	0	0	0	chr1	-	165217845	165217783	0	2
Pogk	e1.0	1	122	-1.37431	0.32575	chr1:166384625-166409828	pogo transposable element with KRAB domain	---	0	0	1	0	0	0	0	0	0	chr1	-	166409828	166409707	0	0
Pogk	e3.0	1297	1430	-1.00434	0.970661	chr1:166384625-166409828	pogo transposable element with KRAB domain	---	0	0	1	0	0	0	0	0	0	chr1	-	166408532	166408399	0	1
Pogk	e6.0	9664	11139	-1.00831	0.674741	chr1:166384625-166409828	pogo transposable element with KRAB domain	---	0	0	1	0	0	0	0	0	0	chr1	-	166400165	166398690	0	1
Pbx1	e1.0	1	856	-1.02372	0.797579	chr1:168119365-168432169	pre B cell leukemia homeobox 1	---	0	0	1	0	0	0	0	0	0	chr1	-	168432169	168431314	0	0
Pbx1	e2.0	4228	4301	1.0972	0.503512	chr1:168119365-168432169	pre B cell leukemia homeobox 1	---	0	0	1	0	0	0	0	0	0	chr1	-	168427942	168427869	0	1
Pbx1	e3.0	222575	222819	-1.00838	0.914684	chr1:168119365-168432169	pre B cell leukemia homeobox 1	---	1	0	1	0	0	0	0	0	0	chr1	-	168209595	168209351	0	1
Pbx1	e4.0	228633	228823	-1.09102	0.369111	chr1:168119365-168432169	pre B cell leukemia homeobox 1	---	1	0	1	0	0	0	0	0	0	chr1	-	168203537	168203347	0	0
Pbx1	e5.0	236287	236422	-1.03517	0.735551	chr1:168119365-168432169	pre B cell leukemia homeobox 1	---	1	0	1	0	0	0	0	0	0	chr1	-	168195883	168195748	0	0
Pbx1	e6.0	240733	240892	-1.03267	0.672852	chr1:168119365-168432169	pre B cell leukemia homeobox 1	---	1	0	1	0	0	1	0	0	0	chr1	-	168191437	168191278	0	0
Pbx1	e7.0	247102	247214	1.07808	0.27729	chr1:168119365-168432169	pre B cell leukemia homeobox 1	---	1	0	1	0	0	1	0	0	0	chr1	-	168185068	168184956	0	0
Pbx1	e8.0	248551	248640	1.0253	0.706324	chr1:168119365-168432169	pre B cell leukemia homeobox 1	---	1	0	1	0	0	0	0	0	0	chr1	-	168183619	168183530	0	0
Uhmk1	e1.0	1	435	-1.0881	0.451827	chr1:170193422-170215407	U2AF homology motif (UHM) kinase 1	---	0	0	1	0	0	0	0	0	0	chr1	-	170215407	170214973	0	0
Atf6	e1.0	1	122	-1.07053	0.780684	chr1:170704457-170867771	activating transcription factor 6	ENSMUSG00000026663	0	0	1	0	0	0	0	0	0	chr1	-	170867771	170867650	0	0
Atf6	e2.0	12583	12659	-1.06758	0.786023	chr1:170704457-170867771	activating transcription factor 6	ENSMUSG00000026663	0	0	1	0	0	0	0	0	0	chr1	-	170855189	170855113	0	1
Atf6	e3.0	14780	14867	1.33782	0.194622	chr1:170704457-170867771	activating transcription factor 6	ENSMUSG00000026663	0	0	1	0	0	0	0	0	0	chr1	-	170852992	170852905	0	1
Atf6	e4.0	18555	18655	-1.03078	0.831348	chr1:170704457-170867771	activating transcription factor 6	ENSMUSG00000026663	0	0	1	0	0	0	0	0	0	chr1	-	170849217	170849117	0	1
Atf6	e5.0	25960	26086	-1.41784	0.0442699	chr1:170704457-170867771	activating transcription factor 6	ENSMUSG00000026663	0	0	1	0	0	0	0	0	0	chr1	-	170841812	170841686	0	1
Atf6	e6.0	26888	27091	-1.01031	0.888802	chr1:170704457-170867771	activating transcription factor 6	ENSMUSG00000026663	0	0	1	0	0	0	0	0	0	chr1	-	170840884	170840681	0	1
Atf6	e7.0	32732	32952	-1.23862	0.134496	chr1:170704457-170867771	activating transcription factor 6	ENSMUSG00000026663	0	0	1	0	0	0	0	0	0	chr1	-	170835040	170834820	0	1
Atf6	e8.0	48340	48525	1.14768	0.550042	chr1:170704457-170867771	activating transcription factor 6	ENSMUSG00000026663	0	0	1	0	0	0	0	0	0	chr1	-	170819432	170819247	0	1
Atf6	e9.0	52258	52349	1.10467	0.382453	chr1:170704457-170867771	activating transcription factor 6	ENSMUSG00000026663	0	0	1	0	0	0	0	0	0	chr1	-	170815514	170815423	0	1
Atf6	e10.0	68027	68158	1.17283	0.184564	chr1:170704457-170867771	activating transcription factor 6	ENSMUSG00000026663	0	0	1	0	0	0	0	0	0	chr1	-	170799745	170799614	0	1
Atf6	e11.0	73002	73115	-1.0982	0.559167	chr1:170704457-170867771	activating transcription factor 6	ENSMUSG00000026663	0	0	1	0	0	0	0	0	0	chr1	-	170794770	170794657	0	1
Tomm40l	e1.0	1	141	-1.07584	0.277547	chr1:171216011-171222515	translocase of outer mitochondrial membrane 40-like	ENSMUSG00000005674	0	0	1	0	0	0	0	0	0	chr1	-	171222515	171222375	0	0
Ufc1	e2.0	163484	163565	1.04626	0.800025	chr1:171288564-171458485	ubiquitin-fold modifier conjugating enzyme 1	---	0	0	1	0	0	0	0	0	0	chr1	-	171295002	171294921	0	0
Rgs7	e1.0	1	285	-1.096	0.695283	chr1:175059076-175492545	regulator of G protein signaling 7	---	0	0	1	0	0	0	0	0	0	chr1	-	175492545	175492261	0	0
Rgs7	e2.0	1370	1493	1.05749	0.317084	chr1:175059076-175492545	regulator of G protein signaling 7	---	0	0	1	0	0	0	0	0	0	chr1	-	175491176	175491053	0	1
Rgs7	e3.0	221633	221730	1.00058	0.993483	chr1:175059076-175492545	regulator of G protein signaling 7	---	0	0	1	0	0	0	0	0	0	chr1	-	175270913	175270816	0	1
Rgs7	e4.0	339313	339422	-1.0061	0.900321	chr1:175059076-175492545	regulator of G protein signaling 7	---	0	0	1	1	0	0	0	0	0	chr1	-	175153233	175153124	0	0
Rgs7	e5.0	342843	342894	-1.0416	0.397618	chr1:175059076-175492545	regulator of G protein signaling 7	---	0	0	1	1	0	0	0	0	0	chr1	-	175149703	175149652	0	0
Rgs7	e6.0	369551	369615	-1.02873	0.635191	chr1:175059076-175492545	regulator of G protein signaling 7	---	0	0	1	0	0	0	0	0	0	chr1	-	175122995	175122931	0	1
Rgs7	e7.0	370575	370651	1.00403	0.936531	chr1:175059076-175492545	regulator of G protein signaling 7	---	0	0	1	0	0	0	0	0	0	chr1	-	175121971	175121895	0	1
Rgs7	e8.0	370737	370818	1.03745	0.547617	chr1:175059076-175492545	regulator of G protein signaling 7	---	0	0	1	0	0	0	0	0	0	chr1	-	175121809	175121728	0	1
Rgs7	e9.0	398668	398742	1.01658	0.780295	chr1:175059076-175492545	regulator of G protein signaling 7	---	0	0	1	0	0	0	0	0	0	chr1	-	175093878	175093804	0	1
Rgs7	e10.0	401454	401552	1.02979	0.595965	chr1:175059076-175492545	regulator of G protein signaling 7	---	0	0	1	0	0	0	0	0	0	chr1	-	175091092	175090994	0	1
Rgs7	e11.0	403066	403127	-1.02037	0.716152	chr1:175059076-175492545	regulator of G protein signaling 7	---	0	0	1	0	0	0	0	0	0	chr1	-	175089480	175089419	0	1
Rgs7	e12.0	406320	406430	-1.03061	0.491261	chr1:175059076-175492545	regulator of G protein signaling 7	---	0	0	1	0	0	0	0	0	0	chr1	-	175086226	175086116	0	1
Rgs7	e13.0	408449	408574	1.01165	0.811889	chr1:175059076-175492545	regulator of G protein signaling 7	---	0	0	1	0	0	0	0	0	0	chr1	-	175084097	175083972	0	2
Rgs7	e14.0	412955	413141	-1.02611	0.377668	chr1:175059076-175492545	regulator of G protein signaling 7	---	0	0	1	0	0	0	0	0	0	chr1	-	175079591	175079405	0	2
Pld5	e2.0	61372	61694	1.0969	0.698718	chr1:175962306-176275313	phospholipase D family, member 5	---	0	0	1	0	0	0	0	0	0	chr1	-	176213942	176213620	0	0
Adss	e1.0	1	298	-1.2596	0.544808	chr1:177762962-177796509	adenylosuccinate synthetase, non muscle	ENSMUSG00000015961	0	0	1	0	0	0	0	0	0	chr1	-	177796509	177796212	0	0
Adss	e2.0	11512	11614	1.02755	0.661572	chr1:177762962-177796509	adenylosuccinate synthetase, non muscle	ENSMUSG00000015961	0	0	1	0	0	0	0	0	0	chr1	-	177784998	177784896	0	2
Adss	e3.0	12393	12461	1.01843	0.754692	chr1:177762962-177796509	adenylosuccinate synthetase, non muscle	ENSMUSG00000015961	0	0	1	0	0	0	0	0	0	chr1	-	177784117	177784049	0	2
Adss	e4.0	13617	13667	1.03194	0.662036	chr1:177762962-177796509	adenylosuccinate synthetase, non muscle	ENSMUSG00000015961	0	0	1	0	0	0	0	0	0	chr1	-	177782893	177782843	0	2
Adss	e5.0	19631	19697	-1.02482	0.589482	chr1:177762962-177796509	adenylosuccinate synthetase, non muscle	ENSMUSG00000015961	0	0	1	0	0	0	0	0	0	chr1	-	177776879	177776813	0	2
Adss	e6.0	19946	20053	1.01023	0.842431	chr1:177762962-177796509	adenylosuccinate synthetase, non muscle	ENSMUSG00000015961	0	0	1	0	0	0	0	0	0	chr1	-	177776564	177776457	0	2
Adss	e7.0	20848	20929	1.03748	0.435369	chr1:177762962-177796509	adenylosuccinate synthetase, non muscle	ENSMUSG00000015961	0	0	1	0	0	0	0	0	0	chr1	-	177775662	177775581	0	2
Adss	e8.0	22809	22935	-1.00328	0.950197	chr1:177762962-177796509	adenylosuccinate synthetase, non muscle	ENSMUSG00000015961	1	0	1	0	0	0	0	0	0	chr1	-	177773701	177773575	0	1
Adss	e9.0	24284	24438	-1.08479	0.344237	chr1:177762962-177796509	adenylosuccinate synthetase, non muscle	ENSMUSG00000015961	1	0	1	0	0	0	0	0	0	chr1	-	177772226	177772072	0	1
Adss	e10.0	25245	25369	1.06186	0.403472	chr1:177762962-177796509	adenylosuccinate synthetase, non muscle	ENSMUSG00000015961	1	0	1	0	0	0	0	0	0	chr1	-	177771265	177771141	0	1
Adss	e11.0	26488	26585	-1.00984	0.862889	chr1:177762962-177796509	adenylosuccinate synthetase, non muscle	ENSMUSG00000015961	1	0	1	0	0	0	0	0	0	chr1	-	177770022	177769925	0	1
Hnrnpu	e1.0	1	863	-1.35152	0.272539	chr1:178321109-178337815	heterogeneous nuclear ribonucleoprotein U	ENSMUSG00000039630	0	0	1	0	0	0	0	0	0	chr1	-	178337815	178336953	0	0
Hnrnpu	e2.0	1658	1769	1.0139	0.850372	chr1:178321109-178337815	heterogeneous nuclear ribonucleoprotein U	ENSMUSG00000039630	0	0	1	0	0	0	0	0	0	chr1	-	178336158	178336047	0	1
Hnrnpu	e3.0	1861	1934	1.06238	0.486879	chr1:178321109-178337815	heterogeneous nuclear ribonucleoprotein U	ENSMUSG00000039630	0	0	1	0	0	0	0	0	0	chr1	-	178335955	178335882	0	1
Hnrnpu	e4.0	3790	3929	-1.14846	0.0401979	chr1:178321109-178337815	heterogeneous nuclear ribonucleoprotein U	ENSMUSG00000039630	0	0	1	0	0	0	0	0	0	chr1	-	178334026	178333887	0	1
Hnrnpu	e5.0	4170	4269	-1.05137	0.495615	chr1:178321109-178337815	heterogeneous nuclear ribonucleoprotein U	ENSMUSG00000039630	0	0	1	0	0	0	0	0	0	chr1	-	178333646	178333547	0	1
Hnrnpu	e6.0	4707	4819	1.00946	0.91707	chr1:178321109-178337815	heterogeneous nuclear ribonucleoprotein U	ENSMUSG00000039630	0	0	1	0	0	0	0	0	0	chr1	-	178333109	178332997	0	1
Hnrnpu	e7.0	5460	5723	-1.05585	0.282089	chr1:178321109-178337815	heterogeneous nuclear ribonucleoprotein U	ENSMUSG00000039630	0	0	1	0	0	0	0	0	0	chr1	-	178332356	178332093	0	1
Hnrnpu	e8.0	5862	5981	-1.04521	0.244754	chr1:178321109-178337815	heterogeneous nuclear ribonucleoprotein U	ENSMUSG00000039630	0	0	1	0	0	0	0	0	0	chr1	-	178331954	178331835	0	1
Hnrnpu	e9.0	6339	6467	1.01028	0.677544	chr1:178321109-178337815	heterogeneous nuclear ribonucleoprotein U	ENSMUSG00000039630	0	0	1	0	0	0	0	0	0	chr1	-	178331477	178331349	0	1
Hnrnpu	e10.0	6555	6723	1.00324	0.962263	chr1:178321109-178337815	heterogeneous nuclear ribonucleoprotein U	ENSMUSG00000039630	0	0	1	0	0	0	0	0	0	chr1	-	178331261	178331093	0	1
Hnrnpu	e11.0	6970	7224	1.09334	0.0471833	chr1:178321109-178337815	heterogeneous nuclear ribonucleoprotein U	ENSMUSG00000039630	0	0	1	0	0	0	0	0	0	chr1	-	178330846	178330592	0	1
Hnrnpu	e12.0	7470	7651	1.08321	0.215646	chr1:178321109-178337815	heterogeneous nuclear ribonucleoprotein U	ENSMUSG00000039630	0	0	1	0	0	0	0	0	0	chr1	-	178330346	178330165	0	0
Hnrnpu	e13.0	7877	7948	1.04156	0.540148	chr1:178321109-178337815	heterogeneous nuclear ribonucleoprotein U	ENSMUSG00000039630	0	0	1	0	0	0	0	0	0	chr1	-	178329939	178329868	0	0
Hnrnpu	e15.0	12503	12573	1.42641	0.488034	chr1:178321109-178337815	heterogeneous nuclear ribonucleoprotein U	ENSMUSG00000039630	1	0	1	0	0	0	0	0	0	chr1	-	178325313	178325243	0	0
Smyd3	e1.0	1	254	-1.04874	0.694666	chr1:178950183-179518041	SET and MYND domain containing 3	---	0	0	1	0	0	0	0	0	0	chr1	-	179518041	179517788	0	0
Smyd3	e2.0	94624	94687	-1.01301	0.919682	chr1:178950183-179518041	SET and MYND domain containing 3	---	0	0	1	0	0	0	0	0	0	chr1	-	179423418	179423355	0	2
Smyd3	e3.0	106257	106364	-1.0286	0.721035	chr1:178950183-179518041	SET and MYND domain containing 3	---	0	0	1	0	0	0	0	0	0	chr1	-	179411785	179411678	0	2
Smyd3	e4.0	107578	107635	-1.07045	0.298543	chr1:178950183-179518041	SET and MYND domain containing 3	---	0	0	1	0	0	0	0	0	0	chr1	-	179410464	179410407	0	2
Smyd3	e5.0	112623	112759	1.12434	0.0233484	chr1:178950183-179518041	SET and MYND domain containing 3	---	0	0	1	0	0	0	0	0	0	chr1	-	179405419	179405283	0	2
Coq8a	e1.0	1	148	1.42853	0.157578	chr1:180165238-180196020	coenzyme Q8A	---	0	0	1	0	0	0	0	0	0	chr1	-	180196020	180195873	0	0
Coq8a	e3.0	13774	13959	-1.09974	0.561301	chr1:180165238-180196020	coenzyme Q8A	---	0	0	1	0	0	1	0	0	0	chr1	-	180182247	180182062	0	0
Psen2	e1.0	1	80	-1.30096	0.485032	chr1:180227006-180256302	presenilin 2	---	0	0	1	0	0	0	0	0	0	chr1	-	180256302	180256223	0	0
Psen2	e3.0	10546	10689	-1.41597	0.0222907	chr1:180227006-180256302	presenilin 2	---	0	0	1	0	0	0	0	0	0	chr1	-	180245757	180245614	0	1
Psen2	e4.0	15358	15572	-1.03972	0.731115	chr1:180227006-180256302	presenilin 2	---	0	0	1	0	0	0	0	0	0	chr1	-	180240945	180240731	0	1
Psen2	e5.0	17289	17430	-1.01082	0.893812	chr1:180227006-180256302	presenilin 2	---	0	0	1	0	0	0	0	0	0	chr1	-	180239014	180238873	0	1
Psen2	e6.0	20325	20392	-1.05146	0.697881	chr1:180227006-180256302	presenilin 2	---	0	0	1	0	0	0	0	0	0	chr1	-	180235978	180235911	0	1
Psen2	e7.0	21094	21314	-1.02909	0.675981	chr1:180227006-180256302	presenilin 2	---	0	0	1	0	0	0	0	0	0	chr1	-	180235209	180234989	0	2
Psen2	e8.0	22594	22692	-1.11057	0.163562	chr1:180227006-180256302	presenilin 2	---	0	0	1	0	0	0	0	0	0	chr1	-	180233709	180233611	0	2
Psen2	e9.0	26378	26461	1.03826	0.679298	chr1:180227006-180256302	presenilin 2	---	1	0	1	0	0	0	0	0	0	chr1	-	180229925	180229842	0	2
Nvl	e1.0	1	154	-1.23426	0.616263	chr1:181087138-181144204	nuclear VCP-like	ENSMUSG00000026516	0	0	1	0	0	0	0	0	0	chr1	-	181144204	181144051	0	0
Nvl	e2.0	1806	1879	-1.11986	0.777893	chr1:181087138-181144204	nuclear VCP-like	ENSMUSG00000026516	0	0	1	0	0	0	0	0	0	chr1	-	181142399	181142326	0	1
Nvl	e4.0	5038	5134	-1.30536	0.377717	chr1:181087138-181144204	nuclear VCP-like	ENSMUSG00000026516	0	0	1	0	0	0	0	0	0	chr1	-	181139167	181139071	0	1
Lbr	e2.0	3846	4024	-1.20677	0.412841	chr1:181815316-181842401	lamin B receptor	ENSMUSG00000004880	0	0	1	0	0	0	0	0	0	chr1	-	181838556	181838378	0	1
Lbr	e3.0	6114	6344	-1.32336	0.216009	chr1:181815316-181842401	lamin B receptor	ENSMUSG00000004880	0	0	1	0	0	0	0	0	0	chr1	-	181836288	181836058	0	1
Lbr	e4.0	10170	10253	1.15829	0.453273	chr1:181815316-181842401	lamin B receptor	ENSMUSG00000004880	0	0	1	0	0	0	0	0	0	chr1	-	181832232	181832149	0	1
Lbr	e5.0	10668	10860	-1.35657	0.311995	chr1:181815316-181842401	lamin B receptor	ENSMUSG00000004880	0	0	1	0	0	0	0	0	0	chr1	-	181831734	181831542	0	1
Lbr	e6.0	13494	13690	-1.06872	0.849425	chr1:181815316-181842401	lamin B receptor	ENSMUSG00000004880	0	0	1	0	0	0	0	0	0	chr1	-	181828908	181828712	0	1
Lbr	e7.0	16726	16780	-1.86877	0.189319	chr1:181815316-181842401	lamin B receptor	ENSMUSG00000004880	0	0	1	0	0	0	0	0	0	chr1	-	181825676	181825622	0	1
Lbr	e8.0	20775	20966	-1.05354	0.699544	chr1:181815316-181842401	lamin B receptor	ENSMUSG00000004880	0	0	1	0	0	0	0	0	0	chr1	-	181821627	181821436	0	2
Lbr	e9.0	21625	21728	-1.13961	0.456201	chr1:181815316-181842401	lamin B receptor	ENSMUSG00000004880	0	0	1	0	0	0	0	0	0	chr1	-	181820777	181820674	0	2
Enah	e2.0	58062	58227	1.01468	0.795134	chr1:181896384-182019980	ENAH actin regulator	---	0	0	1	0	0	0	0	0	0	chr1	-	181961919	181961754	0	1
Enah	e3.0	63410	63587	1.06721	0.605907	chr1:181896384-182019980	ENAH actin regulator	---	0	0	1	0	0	0	0	0	0	chr1	-	181956571	181956394	0	1
Degs1	e1.0	1	180	-1.00322	0.976091	chr1:182275770-182282801	delta(4)-desaturase, sphingolipid 1	ENSMUSG00000038633	0	0	1	0	0	0	0	0	0	chr1	-	182282801	182282622	0	0
Degs1	e2.0	607	641	-1.0176	0.944939	chr1:182275770-182282801	delta(4)-desaturase, sphingolipid 1	ENSMUSG00000038633	0	0	1	0	0	0	0	0	0	chr1	-	182282195	182282161	0	0
Fbxo28	e1.0	1	297	-1.00489	0.966665	chr1:182313102-182341619	F-box protein 28	ENSMUSG00000047539	0	0	1	0	0	0	0	0	0	chr1	-	182341619	182341323	0	0
Fbxo28	e2.0	11637	11746	-1.02411	0.753127	chr1:182313102-182341619	F-box protein 28	ENSMUSG00000047539	0	0	1	0	0	0	0	0	0	chr1	-	182329983	182329874	0	1
Fbxo28	e3.0	15228	15366	1.00401	0.924598	chr1:182313102-182341619	F-box protein 28	ENSMUSG00000047539	0	0	1	0	0	0	0	0	0	chr1	-	182326392	182326254	0	1
Capn2	e1.0	1	493	-1.19645	0.272319	chr1:182467254-182517610	calpain 2	ENSMUSG00000026509	0	0	1	0	0	0	0	0	0	chr1	-	182517610	182517118	0	0
Capn2	e2.0	5335	5404	-1.16052	0.335566	chr1:182467254-182517610	calpain 2	ENSMUSG00000026509	0	0	1	0	0	0	0	0	0	chr1	-	182512276	182512207	0	0
Capn2	e4.0	24741	24859	-1.17014	0.221638	chr1:182467254-182517610	calpain 2	ENSMUSG00000026509	0	0	1	0	0	0	0	0	0	chr1	-	182492870	182492752	0	0
Mtarc2	e2.0	544	906	-1.24732	0.216468	chr1:184813066-184846451	mitochondrial amidoxime reducing component 2	ENSMUSG00000073481	0	0	1	0	0	0	0	0	0	chr1	-	184845908	184845546	0	0
Mtarc2	e3.0	5025	5198	-1.03564	0.670812	chr1:184813066-184846451	mitochondrial amidoxime reducing component 2	ENSMUSG00000073481	0	0	1	0	0	1	0	0	0	chr1	-	184841427	184841254	0	1
C130074G19Rik	e2.0	8610	9376	1.04193	0.794955	chr1:184871922-184883036	RIKEN cDNA C130074G19 gene	ENSMUSG00000039349	0	0	1	0	0	0	0	0	0	chr1	-	184874427	184873661	0	0
Iars2	e1.0	1	382	-1.31623	0.0649627	chr1:185284727-185329402	isoleucine-tRNA synthetase 2, mitochondrial	---	0	0	1	0	0	0	0	0	0	chr1	-	185329402	185329021	0	0
Iars2	e2.0	1661	1783	-1.26681	0.105086	chr1:185284727-185329402	isoleucine-tRNA synthetase 2, mitochondrial	---	0	0	1	0	0	0	0	0	0	chr1	-	185327742	185327620	0	1
Iars2	e3.0	3741	3900	1.0671	0.653603	chr1:185284727-185329402	isoleucine-tRNA synthetase 2, mitochondrial	---	0	0	1	0	0	0	0	0	0	chr1	-	185325662	185325503	0	1
Iars2	e4.0	5588	5736	1.05504	0.485692	chr1:185284727-185329402	isoleucine-tRNA synthetase 2, mitochondrial	---	0	0	1	0	0	0	0	0	0	chr1	-	185323815	185323667	0	1
Iars2	e5.0	6168	6217	1.03218	0.741444	chr1:185284727-185329402	isoleucine-tRNA synthetase 2, mitochondrial	---	0	0	1	0	0	0	0	0	0	chr1	-	185323235	185323186	0	1
Iars2	e6.0	6301	6410	-1.04386	0.65236	chr1:185284727-185329402	isoleucine-tRNA synthetase 2, mitochondrial	---	0	0	1	0	0	0	0	0	0	chr1	-	185323102	185322993	0	1
Iars2	e7.0	6492	6582	-1.06672	0.62262	chr1:185284727-185329402	isoleucine-tRNA synthetase 2, mitochondrial	---	0	0	1	0	0	0	0	0	0	chr1	-	185322911	185322821	0	1
Iars2	e8.0	6888	7003	1.00895	0.931112	chr1:185284727-185329402	isoleucine-tRNA synthetase 2, mitochondrial	---	0	0	1	0	0	0	0	0	0	chr1	-	185322515	185322400	0	1
Iars2	e9.0	8397	8566	1.09114	0.268871	chr1:185284727-185329402	isoleucine-tRNA synthetase 2, mitochondrial	---	1	0	1	0	0	0	0	0	0	chr1	-	185321006	185320837	0	1
Iars2	e10.0	10749	10839	1.13502	0.243379	chr1:185284727-185329402	isoleucine-tRNA synthetase 2, mitochondrial	---	1	0	1	0	0	0	0	0	0	chr1	-	185318654	185318564	0	1
Iars2	e11.0	11445	11596	-1.21102	0.0819369	chr1:185284727-185329402	isoleucine-tRNA synthetase 2, mitochondrial	---	1	0	1	0	0	0	0	0	0	chr1	-	185317958	185317807	0	1
Iars2	e12.0	13349	13509	1.15915	0.220161	chr1:185284727-185329402	isoleucine-tRNA synthetase 2, mitochondrial	---	1	0	1	0	0	0	0	0	0	chr1	-	185316054	185315894	0	1
Iars2	e14.0	26002	26104	-1.08771	0.458288	chr1:185284727-185329402	isoleucine-tRNA synthetase 2, mitochondrial	---	1	0	1	0	0	0	0	0	0	chr1	-	185303401	185303299	0	1
Iars2	e15.0	26602	26695	-1.31644	0.090104	chr1:185284727-185329402	isoleucine-tRNA synthetase 2, mitochondrial	---	1	0	1	0	0	0	0	0	0	chr1	-	185302801	185302708	0	1
Iars2	e16.0	31822	31930	-1.0946	0.305667	chr1:185284727-185329402	isoleucine-tRNA synthetase 2, mitochondrial	---	1	0	1	0	0	0	0	0	0	chr1	-	185297581	185297473	0	1
Iars2	e17.0	32890	32992	1.07839	0.491275	chr1:185284727-185329402	isoleucine-tRNA synthetase 2, mitochondrial	---	1	0	1	0	0	0	0	0	0	chr1	-	185296513	185296411	0	1
Iars2	e18.0	33723	33848	-1.09395	0.500997	chr1:185284727-185329402	isoleucine-tRNA synthetase 2, mitochondrial	---	1	0	1	0	0	0	0	0	0	chr1	-	185295680	185295555	0	1
Iars2	e19.0	34528	34659	-1.1989	0.0703587	chr1:185284727-185329402	isoleucine-tRNA synthetase 2, mitochondrial	---	1	0	1	0	0	0	0	0	0	chr1	-	185294875	185294744	0	1
Iars2	e20.0	37978	38084	1.07928	0.442575	chr1:185284727-185329402	isoleucine-tRNA synthetase 2, mitochondrial	---	1	0	1	0	0	0	0	0	0	chr1	-	185291425	185291319	0	1
Iars2	e21.0	38772	38917	1.12961	0.0716131	chr1:185284727-185329402	isoleucine-tRNA synthetase 2, mitochondrial	---	1	0	1	0	0	0	0	0	0	chr1	-	185290631	185290486	0	1
Iars2	e22.0	39860	40050	1.0839	0.177069	chr1:185284727-185329402	isoleucine-tRNA synthetase 2, mitochondrial	---	1	0	1	0	0	0	0	0	0	chr1	-	185289543	185289353	0	1
Kctd3	e1.0	1	313	-1.12516	0.70849	chr1:188971095-189007842	potassium channel tetramerisation domain containing 3	---	0	0	1	0	0	0	0	0	0	chr1	-	189007842	189007530	0	0
Kctd3	e2.0	5885	5938	-1.00748	0.966322	chr1:188971095-189007842	potassium channel tetramerisation domain containing 3	---	0	0	1	0	0	0	0	0	0	chr1	-	189001958	189001905	0	1
Kctd3	e3.0	6455	6500	-1.02773	0.858013	chr1:188971095-189007842	potassium channel tetramerisation domain containing 3	---	0	0	1	0	0	0	0	0	0	chr1	-	189001388	189001343	0	1
Kctd3	e4.0	7517	7590	-1.03444	0.773381	chr1:188971095-189007842	potassium channel tetramerisation domain containing 3	---	0	0	1	0	0	0	0	0	0	chr1	-	189000326	189000253	0	1
Kcnk2	e2.0	58082	58283	-1.08685	0.866639	chr1:189207930-189402273	potassium channel, subfamily K, member 2	---	0	0	1	0	0	0	0	0	0	chr1	-	189344192	189343991	0	0
Kcnk2	e3.0	58429	58973	-1.11307	0.568758	chr1:189207930-189402273	potassium channel, subfamily K, member 2	---	0	0	1	0	0	0	0	0	0	chr1	-	189343845	189343301	0	0
Kcnk2	e4.0	59186	59231	1.17156	0.260827	chr1:189207930-189402273	potassium channel, subfamily K, member 2	---	0	0	1	1	0	0	0	0	0	chr1	-	189343088	189343043	0	0
Smyd2	e1.0	1	187	-1.13177	0.478868	chr1:189880492-189922293	SET and MYND domain containing 2	ENSMUSG00000026603	0	0	1	0	0	0	0	0	0	chr1	-	189922293	189922107	0	0
Smyd2	e2.0	12380	12443	-1.08009	0.340081	chr1:189880492-189922293	SET and MYND domain containing 2	ENSMUSG00000026603	0	0	1	1	0	0	0	0	0	chr1	-	189909914	189909851	0	0
Smyd2	e3.0	22366	22476	1.00164	0.946094	chr1:189880492-189922293	SET and MYND domain containing 2	ENSMUSG00000026603	0	0	1	0	0	0	0	0	0	chr1	-	189899928	189899818	0	0
Smyd2	e5.0	24811	24871	-1.02599	0.188042	chr1:189880492-189922293	SET and MYND domain containing 2	ENSMUSG00000026603	0	0	1	0	0	0	0	0	0	chr1	-	189897483	189897423	0	0
Smyd2	e6.0	25599	25723	-1.00201	0.946395	chr1:189880492-189922293	SET and MYND domain containing 2	ENSMUSG00000026603	0	0	1	0	0	0	0	0	0	chr1	-	189896695	189896571	0	0
Smyd2	e7.0	30827	30894	-1.00236	0.956998	chr1:189880492-189922293	SET and MYND domain containing 2	ENSMUSG00000026603	0	0	1	0	0	0	0	0	0	chr1	-	189891467	189891400	0	0
Vash2	e1.0	1	162	-1.2998	0.439573	chr1:190947648-190979298	vasohibin 2	ENSMUSG00000037568	0	0	1	0	0	0	0	0	0	chr1	-	190979298	190979137	0	0
Vash2	e2.0	301	593	-1.38963	0.513288	chr1:190947648-190979298	vasohibin 2	ENSMUSG00000037568	0	0	1	0	0	0	0	0	0	chr1	-	190978998	190978706	0	0
Flvcr1	e1.0	1	814	1.02635	0.935159	chr1:191005832-191026190	feline leukemia virus subgroup C cellular receptor 1	---	0	0	1	0	0	0	0	0	0	chr1	-	191026190	191025377	0	0
Flvcr1	e2.0	4935	5115	1.24539	0.196276	chr1:191005832-191026190	feline leukemia virus subgroup C cellular receptor 1	---	1	0	1	0	0	1	0	0	0	chr1	-	191021256	191021076	0	0
Flvcr1	e3.0	10693	10833	1.15067	0.600102	chr1:191005832-191026190	feline leukemia virus subgroup C cellular receptor 1	---	1	0	1	0	0	0	0	0	0	chr1	-	191015498	191015358	0	1
Flvcr1	e4.0	12760	12827	-1.3237	0.257701	chr1:191005832-191026190	feline leukemia virus subgroup C cellular receptor 1	---	1	0	1	0	0	0	0	0	0	chr1	-	191013431	191013364	0	1
Flvcr1	e5.0	13949	14052	-1.05452	0.840988	chr1:191005832-191026190	feline leukemia virus subgroup C cellular receptor 1	---	1	0	1	0	0	0	0	0	0	chr1	-	191012242	191012139	0	1
Flvcr1	e6.0	14545	14655	-1.15162	0.377557	chr1:191005832-191026190	feline leukemia virus subgroup C cellular receptor 1	---	1	0	1	0	0	0	0	0	0	chr1	-	191011646	191011536	0	1
Flvcr1	e7.0	14898	15003	-1.00392	0.988931	chr1:191005832-191026190	feline leukemia virus subgroup C cellular receptor 1	---	1	0	1	0	0	0	0	0	0	chr1	-	191011293	191011188	0	1
Flvcr1	e8.0	16528	16642	-1.01607	0.930467	chr1:191005832-191026190	feline leukemia virus subgroup C cellular receptor 1	---	1	0	1	0	0	0	0	0	0	chr1	-	191009663	191009549	0	1
Rcor3	e1.0	1	302	1.20005	0.558225	chr1:192098546-192138040	REST corepressor 3	---	0	0	1	0	0	0	0	0	0	chr1	-	192138040	192137739	0	0
Rcor3	e2.0	552	608	1.1489	0.556097	chr1:192098546-192138040	REST corepressor 3	---	0	0	1	0	0	0	0	0	0	chr1	-	192137489	192137433	0	1
Rcor3	e3.0	7581	7658	1.1231	0.509783	chr1:192098546-192138040	REST corepressor 3	---	1	0	1	0	0	0	0	0	0	chr1	-	192130460	192130383	0	1
Rcor3	e6.0	10013	10065	-1.01263	0.946818	chr1:192098546-192138040	REST corepressor 3	---	1	0	1	0	0	0	0	0	0	chr1	-	192128028	192127976	0	1
Rcor3	e7.0	12014	12175	-1.0863	0.75119	chr1:192098546-192138040	REST corepressor 3	---	1	0	1	0	0	0	0	0	0	chr1	-	192126027	192125866	0	1
Rcor3	e8.0	13674	13798	-1.0447	0.67535	chr1:192098546-192138040	REST corepressor 3	---	1	0	1	0	0	0	0	0	0	chr1	-	192124367	192124243	0	1
Rcor3	e9.0	14424	14502	-1.03015	0.844791	chr1:192098546-192138040	REST corepressor 3	---	1	0	1	0	0	0	0	0	0	chr1	-	192123617	192123539	0	1
Rcor3	e10.0	17908	18126	-1.05225	0.459237	chr1:192098546-192138040	REST corepressor 3	---	1	0	1	0	0	0	0	0	0	chr1	-	192120133	192119915	0	1
Rcor3	e11.0	21695	21772	1.00661	0.960396	chr1:192098546-192138040	REST corepressor 3	---	1	0	1	0	0	0	0	0	0	chr1	-	192116346	192116269	0	1
Hhat	e2.0	11420	11549	2.05194	0.205393	chr1:192496712-192771219	hedgehog acyltransferase	ENSMUSG00000037375	0	0	1	0	0	0	0	0	0	chr1	-	192759800	192759671	0	1
Hhat	e3.0	22272	22339	-1.02966	0.903804	chr1:192496712-192771219	hedgehog acyltransferase	ENSMUSG00000037375	0	0	1	0	0	0	0	0	0	chr1	-	192748948	192748881	0	1
Hhat	e4.0	29597	29710	1.03139	0.933814	chr1:192496712-192771219	hedgehog acyltransferase	ENSMUSG00000037375	0	0	1	0	0	0	0	0	0	chr1	-	192741623	192741510	0	1
Hhat	e5.0	43742	43936	-1.98729	0.10618	chr1:192496712-192771219	hedgehog acyltransferase	ENSMUSG00000037375	0	0	1	0	0	0	0	0	0	chr1	-	192727478	192727284	0	1
Hhat	e6.0	44867	45100	-1.15017	0.805364	chr1:192496712-192771219	hedgehog acyltransferase	ENSMUSG00000037375	0	0	1	0	0	0	0	0	0	chr1	-	192726353	192726120	0	1
Hhat	e7.0	54092	54263	-1.08469	0.806744	chr1:192496712-192771219	hedgehog acyltransferase	ENSMUSG00000037375	0	0	1	0	0	0	0	0	0	chr1	-	192717128	192716957	0	2
Hhat	e8.0	77271	77421	1.05765	0.902043	chr1:192496712-192771219	hedgehog acyltransferase	ENSMUSG00000037375	0	0	1	0	0	0	0	0	0	chr1	-	192693949	192693799	0	2
Sertad4	e1.0	1	310	1.13818	0.687089	chr1:192844428-192855752	SERTA domain containing 4	---	0	0	1	0	0	0	0	0	0	chr1	-	192855752	192855443	0	0
Utp25	e1.0	1	227	-1.18879	0.647695	chr1:193104403-193130270	UTP25 small subunit processome component	---	0	0	1	0	0	0	0	0	0	chr1	-	193130270	193130044	0	0
Cr1l	e1.0	1	383	-1.05485	0.779996	chr1:195097382-195131570	complement component (3b/4b) receptor 1-like	---	0	0	1	0	0	0	0	0	0	chr1	-	195131570	195131188	0	0
Cr1l	e3.0	1562	1741	1.00317	0.969832	chr1:195097382-195131570	complement component (3b/4b) receptor 1-like	---	0	0	1	0	0	0	0	0	0	chr1	-	195130009	195129830	0	2
Cr1l	e4.0	2325	2424	-1.08733	0.525144	chr1:195097382-195131570	complement component (3b/4b) receptor 1-like	---	0	0	1	0	0	0	0	0	0	chr1	-	195129246	195129147	0	2
Cr1l	e5.0	7796	7881	1.0108	0.960589	chr1:195097382-195131570	complement component (3b/4b) receptor 1-like	---	1	0	1	0	0	0	0	0	0	chr1	-	195123775	195123690	0	1
Cr1l	e6.0	13691	14092	1.06693	0.508299	chr1:195097382-195131570	complement component (3b/4b) receptor 1-like	---	1	0	1	0	0	0	0	0	0	chr1	-	195117880	195117479	0	1
Cr1l	e7.0	16730	16915	-1.40597	0.0121365	chr1:195097382-195131570	complement component (3b/4b) receptor 1-like	---	1	0	1	0	0	0	0	0	0	chr1	-	195114841	195114656	0	1
Cr1l	e8.0	19174	19197	-1.39523	0.284586	chr1:195097382-195131570	complement component (3b/4b) receptor 1-like	---	1	0	1	0	0	0	0	0	0	chr1	-	195112397	195112374	1	1
Cr1l	e9.0	20416	20491	1.08187	0.543905	chr1:195097382-195131570	complement component (3b/4b) receptor 1-like	---	1	0	1	0	0	0	0	0	0	chr1	-	195111155	195111080	0	1
Cnksr3	e1.0	1	607	-1.30965	0.144984	chr10:7119061-7212238	Cnksr family member 3	ENSMUSG00000015202	0	0	1	0	0	0	0	0	0	chr10	-	7212238	7211632	0	0
Cnksr3	e2.0	51432	51595	-1.17525	0.0101472	chr10:7119061-7212238	Cnksr family member 3	ENSMUSG00000015202	0	0	1	0	0	0	0	0	0	chr10	-	7160807	7160644	0	0
Cnksr3	e3.0	57754	57956	-1.13692	0.182969	chr10:7119061-7212238	Cnksr family member 3	ENSMUSG00000015202	0	0	1	0	0	0	0	0	0	chr10	-	7154485	7154283	0	1
Cnksr3	e4.0	59288	59375	-1.25029	0.0834478	chr10:7119061-7212238	Cnksr family member 3	ENSMUSG00000015202	0	0	1	0	0	0	0	0	0	chr10	-	7152951	7152864	0	1
Cnksr3	e5.0	69237	69278	-1.06047	0.691184	chr10:7119061-7212238	Cnksr family member 3	ENSMUSG00000015202	0	0	1	0	0	0	0	0	0	chr10	-	7143002	7142961	0	1
Cnksr3	e6.0	71801	71920	1.00803	0.951373	chr10:7119061-7212238	Cnksr family member 3	ENSMUSG00000015202	0	0	1	0	0	0	0	0	0	chr10	-	7140438	7140319	0	1
Cnksr3	e7.0	73825	73884	1.095	0.490506	chr10:7119061-7212238	Cnksr family member 3	ENSMUSG00000015202	0	0	1	0	0	0	0	0	0	chr10	-	7138414	7138355	0	1
Ipcef1	e2.0	16112	16331	1.3529	0.166432	chr10:6885804-6996577	interaction protein for cytohesin exchange factors 1	---	0	0	1	0	0	0	0	0	0	chr10	-	6980466	6980247	0	0
Ipcef1	e3.0	16895	17064	1.22308	0.132982	chr10:6885804-6996577	interaction protein for cytohesin exchange factors 1	---	0	0	1	0	0	0	0	0	0	chr10	-	6979683	6979514	0	1
Rmnd1	e1.0	1	123	1.03828	0.913063	chr10:4401915-4432388	required for meiotic nuclear division 1 homolog	ENSMUSG00000019763	0	0	1	0	0	0	0	0	0	chr10	-	4432388	4432266	0	0
Rmnd1	e2.0	3218	3312	-1.04529	0.834921	chr10:4401915-4432388	required for meiotic nuclear division 1 homolog	ENSMUSG00000019763	0	0	1	0	0	0	0	0	0	chr10	-	4429171	4429077	0	0
Rmnd1	e3.0	3924	3980	1.52132	0.0156634	chr10:4401915-4432388	required for meiotic nuclear division 1 homolog	ENSMUSG00000019763	0	0	1	0	0	1	0	0	0	chr10	-	4428465	4428409	0	0
Rmnd1	e4.0	4698	5218	1.02849	0.340809	chr10:4401915-4432388	required for meiotic nuclear division 1 homolog	ENSMUSG00000019763	0	0	1	0	0	0	0	0	0	chr10	-	4427691	4427171	0	0
Shprh	e2.0	2188	2843	-1.23404	0.102135	chr10:11149426-11215994	SNF2 histone linker PHD RING helicase	---	0	0	1	0	0	0	0	0	0	chr10	+	11151613	11152268	0	1
Shprh	e3.0	5234	5363	1.0591	0.798468	chr10:11149426-11215994	SNF2 histone linker PHD RING helicase	---	1	0	1	0	0	0	0	0	0	chr10	+	11154659	11154788	0	1
Shprh	e4.0	7595	7813	1.03875	0.815862	chr10:11149426-11215994	SNF2 histone linker PHD RING helicase	---	1	0	1	0	0	0	0	0	0	chr10	+	11157020	11157238	0	1
Shprh	e5.0	10093	10171	1.01154	0.919886	chr10:11149426-11215994	SNF2 histone linker PHD RING helicase	---	1	0	1	0	0	0	0	0	0	chr10	+	11159518	11159596	0	1
Shprh	e6.0	11042	11192	-1.03738	0.812805	chr10:11149426-11215994	SNF2 histone linker PHD RING helicase	---	1	0	1	0	0	0	0	0	0	chr10	+	11160467	11160617	0	1
Shprh	e7.0	12694	12802	1.11191	0.644652	chr10:11149426-11215994	SNF2 histone linker PHD RING helicase	---	1	0	1	0	0	0	0	0	0	chr10	+	11162119	11162227	0	0
Shprh	e8.0	13384	13637	-1.02754	0.859209	chr10:11149426-11215994	SNF2 histone linker PHD RING helicase	---	1	0	1	0	0	0	0	0	0	chr10	+	11162809	11163062	0	0
Shprh	e9.0	14920	15570	-1.22824	0.272792	chr10:11149426-11215994	SNF2 histone linker PHD RING helicase	---	1	0	1	0	0	0	0	0	0	chr10	+	11164345	11164995	0	0
Shprh	e10.0	17061	17312	1.00682	0.958939	chr10:11149426-11215994	SNF2 histone linker PHD RING helicase	---	1	0	1	0	0	0	0	0	0	chr10	+	11166486	11166737	0	0
Shprh	e11.0	18409	18487	-1.16476	0.172376	chr10:11149426-11215994	SNF2 histone linker PHD RING helicase	---	1	0	1	0	0	0	0	0	0	chr10	+	11167834	11167912	0	0
Shprh	e12.0	20554	20717	-1.04572	0.47096	chr10:11149426-11215994	SNF2 histone linker PHD RING helicase	---	1	0	1	0	0	0	0	0	0	chr10	+	11169979	11170142	0	0
Shprh	e13.0	20822	21078	-1.07004	0.666706	chr10:11149426-11215994	SNF2 histone linker PHD RING helicase	---	1	0	1	0	0	0	0	0	0	chr10	+	11170247	11170503	0	0
Shprh	e14.0	22448	22569	-1.47865	0.0297718	chr10:11149426-11215994	SNF2 histone linker PHD RING helicase	---	1	0	1	0	0	0	0	0	0	chr10	+	11171873	11171994	0	0
Shprh	e15.0	29309	29397	-1.30477	0.0809823	chr10:11149426-11215994	SNF2 histone linker PHD RING helicase	---	1	0	1	0	0	0	0	0	0	chr10	+	11178734	11178822	0	0
Shprh	e16.0	32087	32179	-1.24153	0.220025	chr10:11149426-11215994	SNF2 histone linker PHD RING helicase	---	1	0	1	0	0	0	0	0	0	chr10	+	11181512	11181604	0	0
Shprh	e17.0	34349	34456	-1.38794	0.100701	chr10:11149426-11215994	SNF2 histone linker PHD RING helicase	---	1	0	1	0	0	0	0	0	0	chr10	+	11183774	11183881	0	0
Shprh	e18.0	35895	36037	-1.20048	0.373577	chr10:11149426-11215994	SNF2 histone linker PHD RING helicase	---	1	0	1	0	0	0	0	0	0	chr10	+	11185320	11185462	0	0
Shprh	e19.0	36956	37129	1.08536	0.506052	chr10:11149426-11215994	SNF2 histone linker PHD RING helicase	---	1	0	1	0	0	0	0	0	0	chr10	+	11186381	11186554	0	0
Shprh	e20.0	37418	37480	-1.5662	0.1201	chr10:11149426-11215994	SNF2 histone linker PHD RING helicase	---	1	0	1	0	0	0	0	0	0	chr10	+	11186843	11186905	0	0
Shprh	e22.0	40206	40349	-1.14756	0.526921	chr10:11149426-11215994	SNF2 histone linker PHD RING helicase	---	1	0	1	0	0	0	0	0	0	chr10	+	11189631	11189774	0	0
Shprh	e23.0	41561	41662	-1.11455	0.485492	chr10:11149426-11215994	SNF2 histone linker PHD RING helicase	---	1	0	1	0	0	0	0	0	0	chr10	+	11190986	11191087	0	0
Shprh	e24.0	43061	43132	-1.20444	0.170186	chr10:11149426-11215994	SNF2 histone linker PHD RING helicase	---	1	0	1	0	0	0	0	0	0	chr10	+	11192486	11192557	0	0
Shprh	e25.0	44756	44944	-1.12829	0.475413	chr10:11149426-11215994	SNF2 histone linker PHD RING helicase	---	1	0	1	0	0	0	0	0	0	chr10	+	11194181	11194369	0	0
Fbxo30	e1.0	1	171	-1.69022	0.251601	chr10:11281330-11298045	F-box protein 30	---	0	0	1	0	0	0	0	0	0	chr10	+	11281330	11281500	0	0
Plagl1	e1.0	1	342	-1.7033	0.255129	chr10:13090683-13131694	pleiomorphic adenoma gene-like 1	---	0	0	1	0	0	0	0	0	0	chr10	+	13090683	13091024	0	0
Plagl1	e3.0	15173	15211	-1.62801	0.308276	chr10:13090683-13131694	pleiomorphic adenoma gene-like 1	---	1	0	1	0	0	0	0	0	0	chr10	+	13105855	13105893	0	1
Plagl1	e4.0	21837	21868	-1.16349	0.707781	chr10:13090683-13131694	pleiomorphic adenoma gene-like 1	---	1	0	1	0	0	0	0	0	0	chr10	+	13112519	13112550	0	1
Hivep2	e1.0	1	147	-1.39587	0.272407	chr10:13966074-14151376	human immunodeficiency virus type I enhancer binding protein 2	---	0	0	1	0	0	0	0	0	0	chr10	+	13966074	13966220	0	0
Hivep2	e2.0	306	624	1.06434	0.756997	chr10:13966074-14151376	human immunodeficiency virus type I enhancer binding protein 2	---	0	0	1	0	0	0	0	0	0	chr10	+	13966379	13966697	0	0
Hivep2	e3.0	38128	38202	-1.00925	0.975035	chr10:13966074-14151376	human immunodeficiency virus type I enhancer binding protein 2	---	0	0	1	0	0	0	0	0	0	chr10	+	14004201	14004275	0	0
Reps1	e1.0	1	176	-1.0974	0.54038	chr10:18055940-18125155	RalBP1 associated Eps domain containing protein	---	0	0	1	0	0	0	0	0	0	chr10	+	18055940	18056115	0	0
Reps1	e2.0	33509	33632	1.04763	0.570526	chr10:18055940-18125155	RalBP1 associated Eps domain containing protein	---	0	0	1	0	0	0	0	0	0	chr10	+	18089448	18089571	0	1
Map3k5	e2.0	66095	66234	-1.2322	0.557448	chr10:19934472-20142750	mitogen-activated protein kinase kinase kinase 5	ENSMUSG00000071369	0	0	1	0	0	0	0	0	0	chr10	+	20000566	20000705	0	1
Map3k5	e3.0	85087	85110	-1.22518	0.578759	chr10:19934472-20142750	mitogen-activated protein kinase kinase kinase 5	ENSMUSG00000071369	0	0	1	0	0	1	0	0	0	chr10	+	20019558	20019581	1	1
Map3k5	e4.0	89137	89330	-2.15807	0.172345	chr10:19934472-20142750	mitogen-activated protein kinase kinase kinase 5	ENSMUSG00000071369	0	0	1	0	0	0	0	0	0	chr10	+	20023608	20023801	0	1
Map3k5	e5.0	90414	90582	-1.93852	0.102784	chr10:19934472-20142750	mitogen-activated protein kinase kinase kinase 5	ENSMUSG00000071369	0	0	1	0	0	0	0	0	0	chr10	+	20024885	20025053	0	1
Map3k5	e6.0	91710	91816	-1.38199	0.237048	chr10:19934472-20142750	mitogen-activated protein kinase kinase kinase 5	ENSMUSG00000071369	0	0	1	0	0	0	0	0	0	chr10	+	20026181	20026287	0	1
Map3k5	e7.0	94562	94732	-1.18205	0.54553	chr10:19934472-20142750	mitogen-activated protein kinase kinase kinase 5	ENSMUSG00000071369	0	0	1	0	0	0	0	0	0	chr10	+	20029033	20029203	0	1
Map3k5	e8.0	111901	112013	1.08152	0.808507	chr10:19934472-20142750	mitogen-activated protein kinase kinase kinase 5	ENSMUSG00000071369	0	0	1	0	0	0	0	0	0	chr10	+	20046372	20046484	0	1
Map3k5	e9.0	122004	122163	-1.1543	0.602163	chr10:19934472-20142750	mitogen-activated protein kinase kinase kinase 5	ENSMUSG00000071369	0	0	1	0	0	0	0	0	0	chr10	+	20056475	20056634	0	1
Map3k5	e10.0	124466	124619	1.11939	0.715156	chr10:19934472-20142750	mitogen-activated protein kinase kinase kinase 5	ENSMUSG00000071369	0	0	1	0	0	0	0	0	0	chr10	+	20058937	20059090	0	1
Map3k5	e11.0	133358	133465	1.30253	0.516189	chr10:19934472-20142750	mitogen-activated protein kinase kinase kinase 5	ENSMUSG00000071369	0	0	1	0	0	0	0	0	0	chr10	+	20067829	20067936	0	1
Map3k5	e12.0	142011	142060	-1.46966	0.304016	chr10:19934472-20142750	mitogen-activated protein kinase kinase kinase 5	ENSMUSG00000071369	0	0	1	0	0	0	0	0	0	chr10	+	20076482	20076531	0	1
Map3k5	e13.0	144771	144866	-1.61181	0.423886	chr10:19934472-20142750	mitogen-activated protein kinase kinase kinase 5	ENSMUSG00000071369	0	0	1	0	0	0	0	0	0	chr10	+	20079242	20079337	0	1
Map3k5	e14.0	147916	147997	-1.38398	0.453041	chr10:19934472-20142750	mitogen-activated protein kinase kinase kinase 5	ENSMUSG00000071369	0	0	1	0	0	0	0	0	0	chr10	+	20082387	20082468	0	1
Map3k5	e15.0	159891	160024	-1.29775	0.251293	chr10:19934472-20142750	mitogen-activated protein kinase kinase kinase 5	ENSMUSG00000071369	0	0	1	0	0	0	0	0	0	chr10	+	20094362	20094495	0	1
Map3k5	e16.0	165034	165161	-1.06959	0.727005	chr10:19934472-20142750	mitogen-activated protein kinase kinase kinase 5	ENSMUSG00000071369	0	0	1	0	0	0	0	0	0	chr10	+	20099505	20099632	0	2
Map3k5	e17.0	165590	165726	1.45869	0.0854535	chr10:19934472-20142750	mitogen-activated protein kinase kinase kinase 5	ENSMUSG00000071369	0	0	1	0	0	0	0	0	0	chr10	+	20100061	20100197	0	2
Map3k5	e18.0	169689	169794	1.67754	0.040077	chr10:19934472-20142750	mitogen-activated protein kinase kinase kinase 5	ENSMUSG00000071369	0	0	1	0	0	0	0	0	0	chr10	+	20104160	20104265	0	2
Bclaf1	e1.0	1	136	-1.0255	0.91183	chr10:20312469-20344613	BCL2-associated transcription factor 1	---	0	0	1	0	0	0	0	0	0	chr10	+	20312469	20312604	0	0
Bclaf1	e3.0	5540	5643	-1.09103	0.677294	chr10:20312469-20344613	BCL2-associated transcription factor 1	---	1	0	1	0	0	0	0	0	0	chr10	+	20318008	20318111	0	1
Bclaf1	e4.0	9535	9648	-1.13354	0.465714	chr10:20312469-20344613	BCL2-associated transcription factor 1	---	1	0	1	0	0	0	0	0	0	chr10	+	20322003	20322116	0	1
Bclaf1	e6.0	12672	13337	-1.02878	0.597292	chr10:20312469-20344613	BCL2-associated transcription factor 1	---	1	0	1	0	0	0	0	0	0	chr10	+	20325140	20325805	0	1
Bclaf1	e7.0	13462	13631	-1.04161	0.695382	chr10:20312469-20344613	BCL2-associated transcription factor 1	---	1	0	1	0	0	0	0	0	0	chr10	+	20325930	20326099	0	1
Bclaf1	e8.0	15634	15739	-1.04513	0.296119	chr10:20312469-20344613	BCL2-associated transcription factor 1	---	1	0	1	0	0	0	0	0	0	chr10	+	20328102	20328207	0	1
Bclaf1	e9.0	16842	16926	1.08404	0.588194	chr10:20312469-20344613	BCL2-associated transcription factor 1	---	1	0	1	0	0	0	0	0	0	chr10	+	20329310	20329394	0	1
Bclaf1	e10.0	19618	19793	-1.01176	0.907686	chr10:20312469-20344613	BCL2-associated transcription factor 1	---	1	0	1	0	0	0	0	0	0	chr10	+	20332086	20332261	0	1
Ahi1	e2.0	7066	7534	1.09965	0.693742	chr10:20952547-21080429	Abelson helper integration site 1	---	0	0	1	0	0	0	0	0	0	chr10	+	20959612	20960080	0	0
Ahi1	e3.0	10519	10688	-1.30457	0.275512	chr10:20952547-21080429	Abelson helper integration site 1	---	0	0	1	0	0	0	0	0	0	chr10	+	20963065	20963234	0	0
Ahi1	e5.0	12971	13163	1.08672	0.614926	chr10:20952547-21080429	Abelson helper integration site 1	---	0	0	1	0	0	0	0	0	0	chr10	+	20965517	20965709	0	0
Ahi1	e6.0	13380	13475	-1.15159	0.55188	chr10:20952547-21080429	Abelson helper integration site 1	---	0	0	1	0	0	0	0	0	0	chr10	+	20965926	20966021	0	0
Ahi1	e7.0	16442	16627	-1.1989	0.641743	chr10:20952547-21080429	Abelson helper integration site 1	---	0	0	1	0	0	0	0	0	0	chr10	+	20968988	20969173	0	0
Ahi1	e8.0	18303	18455	1.20114	0.485827	chr10:20952547-21080429	Abelson helper integration site 1	---	0	0	1	0	0	0	0	0	0	chr10	+	20970849	20971001	0	0
Ahi1	e9.0	19478	19610	-1.16171	0.514478	chr10:20952547-21080429	Abelson helper integration site 1	---	0	0	1	0	0	0	0	0	0	chr10	+	20972024	20972156	0	0
Ahi1	e10.0	24451	24574	-1.28964	0.31714	chr10:20952547-21080429	Abelson helper integration site 1	---	0	0	1	0	0	0	0	0	0	chr10	+	20976997	20977120	0	0
Ahi1	e11.0	26834	27063	-1.05487	0.769352	chr10:20952547-21080429	Abelson helper integration site 1	---	0	0	1	0	0	0	0	0	0	chr10	+	20979380	20979609	0	0
Ahi1	e12.0	28778	28884	-1.17116	0.529506	chr10:20952547-21080429	Abelson helper integration site 1	---	0	0	1	0	0	0	0	0	0	chr10	+	20981324	20981430	0	0
Ahi1	e13.0	31759	31877	-1.53532	0.161639	chr10:20952547-21080429	Abelson helper integration site 1	---	0	0	1	0	0	0	0	0	0	chr10	+	20984305	20984423	0	0
Ahi1	e15.0	36001	36138	1.03037	0.826025	chr10:20952547-21080429	Abelson helper integration site 1	---	0	0	1	0	0	0	0	0	0	chr10	+	20988547	20988684	0	0
Ahi1	e16.0	47960	48159	1.31165	0.130915	chr10:20952547-21080429	Abelson helper integration site 1	---	0	0	1	0	0	0	0	0	0	chr10	+	21000506	21000705	0	0
Ahi1	e17.0	55206	55232	1.15293	0.438377	chr10:20952547-21080429	Abelson helper integration site 1	---	0	0	1	0	0	1	0	0	0	chr10	+	21007752	21007778	1	0
Ahi1	e18.0	65367	65487	1.11782	0.381345	chr10:20952547-21080429	Abelson helper integration site 1	---	0	0	1	0	0	0	0	0	0	chr10	+	21017913	21018033	0	0
Sgk1	e1.0	1	524	1.14607	0.265575	chr10:21882184-21999900	serum/glucocorticoid regulated kinase 1	---	0	0	1	0	0	0	0	0	0	chr10	+	21882184	21882707	0	0
Sgk1	e3.0	46159	46368	1.129	0.394047	chr10:21882184-21999900	serum/glucocorticoid regulated kinase 1	---	1	0	1	0	0	0	0	0	0	chr10	+	21928342	21928551	0	0
Sgk1	e4.0	87266	87341	1.25901	0.0711369	chr10:21882184-21999900	serum/glucocorticoid regulated kinase 1	---	1	0	1	0	0	0	0	0	0	chr10	+	21969449	21969524	0	0
Sgk1	e9.0	112483	112642	-1.38347	0.0838834	chr10:21882184-21999900	serum/glucocorticoid regulated kinase 1	---	0	0	1	0	0	0	0	0	0	chr10	+	21994666	21994825	0	0
Stx7	e1.0	1	120	-1.01871	0.903849	chr10:24149289-24190224	syntaxin 7	---	0	0	1	0	0	0	0	0	0	chr10	+	24149289	24149408	0	0
Epb41l2	e4.0	81777	82261	-1.11049	0.731745	chr10:25359797-25523519	erythrocyte membrane protein band 4.1 like 2	---	0	0	1	0	0	0	0	0	0	chr10	+	25441573	25442057	0	0
Epb41l2	e5.0	83946	84158	-1.24598	0.184747	chr10:25359797-25523519	erythrocyte membrane protein band 4.1 like 2	---	0	0	1	0	0	0	0	0	0	chr10	+	25443742	25443954	0	2
Epb41l2	e6.0	100996	101100	-1.08532	0.575348	chr10:25359797-25523519	erythrocyte membrane protein band 4.1 like 2	---	0	0	1	0	0	0	0	0	0	chr10	+	25460792	25460896	0	2
Epb41l2	e8.0	108300	108342	-1.12788	0.713252	chr10:25359797-25523519	erythrocyte membrane protein band 4.1 like 2	---	0	0	1	0	0	0	0	0	0	chr10	+	25468096	25468138	0	2
Epb41l2	e9.0	109400	109475	-1.41409	0.386441	chr10:25359797-25523519	erythrocyte membrane protein band 4.1 like 2	---	0	0	1	0	0	0	0	0	0	chr10	+	25469196	25469271	0	2
Epb41l2	e10.0	111623	111841	-1.08422	0.670948	chr10:25359797-25523519	erythrocyte membrane protein band 4.1 like 2	---	0	0	1	0	0	0	0	0	0	chr10	+	25471419	25471637	0	2
Epb41l2	e11.0	113280	113367	1.36405	0.179228	chr10:25359797-25523519	erythrocyte membrane protein band 4.1 like 2	---	0	0	1	0	0	0	0	0	0	chr10	+	25473076	25473163	0	2
Epb41l2	e12.0	119213	119365	1.27451	0.149305	chr10:25359797-25523519	erythrocyte membrane protein band 4.1 like 2	---	0	0	1	0	0	0	0	0	0	chr10	+	25479009	25479161	0	2
Epb41l2	e13.0	119872	119969	1.05631	0.808967	chr10:25359797-25523519	erythrocyte membrane protein band 4.1 like 2	---	0	0	1	0	0	0	0	0	0	chr10	+	25479668	25479765	0	2
Epb41l2	e14.0	124412	124584	1.18637	0.293871	chr10:25359797-25523519	erythrocyte membrane protein band 4.1 like 2	---	0	0	1	0	0	0	0	0	0	chr10	+	25484208	25484380	0	1
Epb41l2	e17.0	133771	133833	-1.13617	0.757938	chr10:25359797-25523519	erythrocyte membrane protein band 4.1 like 2	---	1	0	1	1	0	1	0	0	1	chr10	+	25493567	25493629	0	0
Epb41l2	e18.0	135649	135795	-1.07699	0.805194	chr10:25359797-25523519	erythrocyte membrane protein band 4.1 like 2	---	1	0	1	1	0	1	0	0	1	chr10	+	25495445	25495591	0	0
Epb41l2	e19.0	139980	140147	1.17678	0.7215	chr10:25359797-25523519	erythrocyte membrane protein band 4.1 like 2	---	0	0	1	1	0	1	0	0	1	chr10	+	25499776	25499943	0	0
Epb41l2	e20.0	141782	141835	1.04174	0.897812	chr10:25359797-25523519	erythrocyte membrane protein band 4.1 like 2	---	1	0	1	1	0	1	0	0	1	chr10	+	25501578	25501631	0	0
Epb41l2	e22.0	144341	144463	-1.12853	0.580334	chr10:25359797-25523519	erythrocyte membrane protein band 4.1 like 2	---	1	0	1	1	0	1	0	0	0	chr10	+	25504137	25504259	0	0
Samd3	e1.0	1	109	-1.08421	0.766171	chr10:26229706-26272172	sterile alpha motif domain containing 3	---	0	0	1	0	0	0	0	0	0	chr10	+	26229706	26229814	0	0
Samd3	e2.0	399	499	1.18531	0.345167	chr10:26229706-26272172	sterile alpha motif domain containing 3	---	0	0	1	0	0	0	0	0	0	chr10	+	26230104	26230204	0	2
Echdc1	e1.0	1	132	1.11718	0.407468	chr10:29313166-29347469	enoyl Coenzyme A hydratase domain containing 1	---	0	0	1	0	0	0	0	0	0	chr10	+	29313166	29313297	0	0
Echdc1	e2.0	335	568	1.36207	0.338518	chr10:29313166-29347469	enoyl Coenzyme A hydratase domain containing 1	---	0	0	1	0	0	0	0	0	0	chr10	+	29313500	29313733	0	0
Hdac2	e1.0	1	261	1.01663	0.800438	chr10:36974543-37001891	histone deacetylase 2	ENSMUSG00000019777	0	0	1	0	0	0	0	0	0	chr10	+	36974543	36974803	0	0
Hdac2	e3.0	11765	11882	-1.07832	0.354428	chr10:36974543-37001891	histone deacetylase 2	ENSMUSG00000019777	0	0	1	0	0	0	0	0	0	chr10	+	36986307	36986424	0	1
Hdac2	e4.0	13538	13612	-1.04273	0.479899	chr10:36974543-37001891	histone deacetylase 2	ENSMUSG00000019777	0	0	1	0	0	0	0	0	0	chr10	+	36988080	36988154	0	1
Hdac2	e5.0	14608	14746	1.02006	0.651615	chr10:36974543-37001891	histone deacetylase 2	ENSMUSG00000019777	0	0	1	0	0	0	0	0	0	chr10	+	36989150	36989288	0	1
Tube1	e1.0	1	85	-1.11001	0.837859	chr10:39134023-39152544	tubulin, epsilon 1	ENSMUSG00000019845	0	0	1	0	0	0	0	0	0	chr10	+	39134023	39134107	0	0
Tube1	e2.0	184	257	1.21783	0.526663	chr10:39134023-39152544	tubulin, epsilon 1	ENSMUSG00000019845	0	0	1	0	0	0	0	0	0	chr10	+	39134206	39134279	0	1
Tube1	e3.0	966	1018	1.34994	0.25132	chr10:39134023-39152544	tubulin, epsilon 1	ENSMUSG00000019845	0	0	1	0	0	0	0	0	0	chr10	+	39134988	39135040	0	1
Tube1	e4.0	3112	3169	1.10857	0.736575	chr10:39134023-39152544	tubulin, epsilon 1	ENSMUSG00000019845	0	0	1	0	0	0	0	0	0	chr10	+	39137134	39137191	0	2
Tube1	e5.0	6801	6916	1.06239	0.786739	chr10:39134023-39152544	tubulin, epsilon 1	ENSMUSG00000019845	0	0	1	0	0	0	0	0	0	chr10	+	39140823	39140938	0	2
Tube1	e6.0	8233	8354	1.48882	0.327687	chr10:39134023-39152544	tubulin, epsilon 1	ENSMUSG00000019845	1	0	1	0	0	0	0	0	0	chr10	+	39142255	39142376	0	1
Fyn	e1.0	1	395	-1.12561	0.460487	chr10:39369796-39565372	Fyn proto-oncogene	---	0	0	1	0	0	0	0	0	0	chr10	+	39369796	39370190	0	0
Fyn	e2.0	25210	25249	1.05663	0.509115	chr10:39369796-39565372	Fyn proto-oncogene	---	0	0	1	1	0	0	0	0	0	chr10	+	39395005	39395044	0	0
Fyn	e5.0	85271	85340	-1.03197	0.724277	chr10:39369796-39565372	Fyn proto-oncogene	---	0	0	1	1	0	1	0	0	0	chr10	+	39455066	39455135	0	0
Wasf1	e1.0	1	76	1.09852	0.547678	chr10:40883534-40942490	WASP family, member 1	ENSMUSG00000019831	0	0	1	0	0	0	0	0	0	chr10	+	40883534	40883609	0	0
Wasf1	e2.0	294	537	-1.14763	0.500858	chr10:40883534-40942490	WASP family, member 1	ENSMUSG00000019831	0	0	1	0	0	0	0	0	0	chr10	+	40883827	40884070	0	0
Cd164	e1.0	1	259	-1.06167	0.743725	chr10:41519442-41531044	CD164 antigen	ENSMUSG00000019818	0	0	1	0	0	0	0	0	0	chr10	+	41519442	41519700	0	0
Sesn1	e1.0	1	727	-1.21033	0.28402	chr10:41810574-41908436	sestrin 1	---	0	0	1	0	0	0	0	0	0	chr10	+	41810574	41811300	0	0
Sesn1	e2.0	76866	77022	-1.14666	0.62537	chr10:41810574-41908436	sestrin 1	---	0	0	1	0	0	0	0	0	0	chr10	+	41887439	41887595	0	0
Sec63	e3.0	21947	22046	-1.09948	0.621653	chr10:42761496-42832513	SEC63-like (S. cerevisiae)	ENSMUSG00000019802	1	0	1	0	0	1	0	0	0	chr10	+	42783442	42783541	0	1
Sec63	e4.0	27805	27919	1.02137	0.894009	chr10:42761496-42832513	SEC63-like (S. cerevisiae)	ENSMUSG00000019802	1	0	1	0	0	0	0	0	0	chr10	+	42789300	42789414	0	1
Sec63	e5.0	29684	29796	-1.36385	0.0251464	chr10:42761496-42832513	SEC63-like (S. cerevisiae)	ENSMUSG00000019802	1	0	1	0	0	0	0	0	0	chr10	+	42791179	42791291	0	1
Sec63	e6.0	33280	33341	-1.06336	0.573624	chr10:42761496-42832513	SEC63-like (S. cerevisiae)	ENSMUSG00000019802	1	0	1	0	0	0	0	0	0	chr10	+	42794775	42794836	0	1
Sec63	e7.0	34711	34769	-1.00646	0.974076	chr10:42761496-42832513	SEC63-like (S. cerevisiae)	ENSMUSG00000019802	1	0	1	0	0	0	0	0	0	chr10	+	42796206	42796264	0	1
Sec63	e8.0	36188	36238	-1.01985	0.934058	chr10:42761496-42832513	SEC63-like (S. cerevisiae)	ENSMUSG00000019802	1	0	1	0	0	0	0	0	0	chr10	+	42797683	42797733	0	1
Pdss2	e2.0	77315	77449	1.03152	0.876632	chr10:43221485-43464882	prenyl (solanesyl) diphosphate synthase, subunit 2	---	0	0	1	0	0	0	0	0	0	chr10	+	43298799	43298933	0	2
Pdss2	e3.0	124044	124242	-1.26127	0.105737	chr10:43221485-43464882	prenyl (solanesyl) diphosphate synthase, subunit 2	---	0	0	1	0	0	0	0	0	0	chr10	+	43345528	43345726	0	2
Pdss2	e4.0	150651	150725	-1.00629	0.942783	chr10:43221485-43464882	prenyl (solanesyl) diphosphate synthase, subunit 2	---	1	0	1	0	0	0	0	0	0	chr10	+	43372135	43372209	0	1
Pdss2	e5.0	172387	172560	1.23064	0.0640828	chr10:43221485-43464882	prenyl (solanesyl) diphosphate synthase, subunit 2	---	1	0	1	0	0	0	0	0	0	chr10	+	43393871	43394044	0	1
Pdss2	e6.0	174077	174208	-1.11411	0.518984	chr10:43221485-43464882	prenyl (solanesyl) diphosphate synthase, subunit 2	---	1	0	1	0	0	0	0	0	0	chr10	+	43395561	43395692	0	1
Hace1	e1.0	1	322	-1.47038	0.204278	chr10:45577829-45712345	HECT domain and ankyrin repeat containing, E3 ubiquitin protein ligase 1	ENSMUSG00000038822	0	0	1	0	0	0	0	0	0	chr10	+	45577829	45578150	0	0
Hace1	e2.0	10552	10606	-1.02319	0.89279	chr10:45577829-45712345	HECT domain and ankyrin repeat containing, E3 ubiquitin protein ligase 1	ENSMUSG00000038822	0	0	1	0	0	0	0	0	0	chr10	+	45588380	45588434	0	1
Hace1	e3.0	11653	11742	1.06553	0.634444	chr10:45577829-45712345	HECT domain and ankyrin repeat containing, E3 ubiquitin protein ligase 1	ENSMUSG00000038822	0	0	1	0	0	0	0	0	0	chr10	+	45589481	45589570	0	1
Hace1	e4.0	12440	12544	1.25928	0.221311	chr10:45577829-45712345	HECT domain and ankyrin repeat containing, E3 ubiquitin protein ligase 1	ENSMUSG00000038822	0	0	1	0	0	0	0	0	0	chr10	+	45590268	45590372	0	1
Hace1	e5.0	27681	27756	1.26432	0.0594991	chr10:45577829-45712345	HECT domain and ankyrin repeat containing, E3 ubiquitin protein ligase 1	ENSMUSG00000038822	0	0	1	0	0	0	0	0	0	chr10	+	45605509	45605584	0	1
Hace1	e6.0	40670	40801	1.27758	0.0390884	chr10:45577829-45712345	HECT domain and ankyrin repeat containing, E3 ubiquitin protein ligase 1	ENSMUSG00000038822	0	0	1	0	0	0	0	0	0	chr10	+	45618498	45618629	0	1
Hace1	e7.0	60493	60575	1.0587	0.689438	chr10:45577829-45712345	HECT domain and ankyrin repeat containing, E3 ubiquitin protein ligase 1	ENSMUSG00000038822	0	0	1	0	0	0	0	0	0	chr10	+	45638321	45638403	0	1
Hace1	e8.0	70763	70859	1.16887	0.105859	chr10:45577829-45712345	HECT domain and ankyrin repeat containing, E3 ubiquitin protein ligase 1	ENSMUSG00000038822	0	0	1	0	0	0	0	0	0	chr10	+	45648591	45648687	0	1
Hace1	e9.0	71026	71127	1.18932	0.292661	chr10:45577829-45712345	HECT domain and ankyrin repeat containing, E3 ubiquitin protein ligase 1	ENSMUSG00000038822	0	0	1	0	0	0	0	0	0	chr10	+	45648854	45648955	0	1
Hace1	e10.0	72053	72159	-1.21142	0.0948481	chr10:45577829-45712345	HECT domain and ankyrin repeat containing, E3 ubiquitin protein ligase 1	ENSMUSG00000038822	0	0	1	0	0	0	0	0	0	chr10	+	45649881	45649987	0	1
Hace1	e11.0	74760	74910	1.00436	0.971693	chr10:45577829-45712345	HECT domain and ankyrin repeat containing, E3 ubiquitin protein ligase 1	ENSMUSG00000038822	0	0	1	0	0	0	0	0	0	chr10	+	45652588	45652738	0	1
Hace1	e12.0	92518	92852	1.05971	0.460517	chr10:45577829-45712345	HECT domain and ankyrin repeat containing, E3 ubiquitin protein ligase 1	ENSMUSG00000038822	0	0	1	0	0	0	0	0	0	chr10	+	45670346	45670680	0	1
Hace1	e13.0	93304	93372	1.09754	0.382489	chr10:45577829-45712345	HECT domain and ankyrin repeat containing, E3 ubiquitin protein ligase 1	ENSMUSG00000038822	0	0	1	0	0	0	0	0	0	chr10	+	45671132	45671200	0	1
Hace1	e14.0	93611	93698	-1.1044	0.569366	chr10:45577829-45712345	HECT domain and ankyrin repeat containing, E3 ubiquitin protein ligase 1	ENSMUSG00000038822	0	0	1	0	0	0	0	0	0	chr10	+	45671439	45671526	0	1
Hace1	e15.0	94500	94611	1.00583	0.949514	chr10:45577829-45712345	HECT domain and ankyrin repeat containing, E3 ubiquitin protein ligase 1	ENSMUSG00000038822	0	0	1	0	0	0	0	0	0	chr10	+	45672328	45672439	0	1
Hace1	e16.0	94711	94808	-1.0541	0.548784	chr10:45577829-45712345	HECT domain and ankyrin repeat containing, E3 ubiquitin protein ligase 1	ENSMUSG00000038822	0	0	1	0	0	0	0	0	0	chr10	+	45672539	45672636	0	1
Hace1	e17.0	94946	95033	-1.12763	0.335884	chr10:45577829-45712345	HECT domain and ankyrin repeat containing, E3 ubiquitin protein ligase 1	ENSMUSG00000038822	0	0	1	0	0	0	0	0	0	chr10	+	45672774	45672861	0	2
Hace1	e18.0	98553	98702	-1.03085	0.680746	chr10:45577829-45712345	HECT domain and ankyrin repeat containing, E3 ubiquitin protein ligase 1	ENSMUSG00000038822	0	0	1	0	0	0	0	0	0	chr10	+	45676381	45676530	0	2
Hace1	e19.0	99239	99435	1.01162	0.919289	chr10:45577829-45712345	HECT domain and ankyrin repeat containing, E3 ubiquitin protein ligase 1	ENSMUSG00000038822	0	0	1	0	0	0	0	0	0	chr10	+	45677067	45677263	0	2
Hace1	e20.0	108774	108905	1.07407	0.600773	chr10:45577829-45712345	HECT domain and ankyrin repeat containing, E3 ubiquitin protein ligase 1	ENSMUSG00000038822	0	0	1	0	0	1	0	0	0	chr10	+	45686602	45686733	0	1
Hace1	e21.0	122749	122847	-1.02397	0.748245	chr10:45577829-45712345	HECT domain and ankyrin repeat containing, E3 ubiquitin protein ligase 1	ENSMUSG00000038822	0	0	1	0	0	0	0	0	0	chr10	+	45700577	45700675	0	2
Hsf2	e1.0	1	219	1.01849	0.885879	chr10:57486383-57513143	heat shock factor 2	---	0	0	1	0	0	0	0	0	0	chr10	+	57486383	57486601	0	0
Hsf2	e2.0	9516	9624	1.01949	0.879462	chr10:57486383-57513143	heat shock factor 2	---	0	0	1	0	0	0	0	0	0	chr10	+	57495898	57496006	0	1
Hsf2	e3.0	9773	9900	1.08117	0.491576	chr10:57486383-57513143	heat shock factor 2	---	0	0	1	0	0	0	0	0	0	chr10	+	57496155	57496282	0	1
Hsf2	e4.0	11115	11239	-1.02843	0.842405	chr10:57486383-57513143	heat shock factor 2	---	0	0	1	0	0	0	0	0	0	chr10	+	57497497	57497621	0	1
Hsf2	e5.0	13034	13109	-1.00115	0.992403	chr10:57486383-57513143	heat shock factor 2	---	0	0	1	0	0	0	0	0	0	chr10	+	57499416	57499491	0	1
Hsf2	e6.0	14988	15049	1.20837	0.0891274	chr10:57486383-57513143	heat shock factor 2	---	0	0	1	0	0	0	0	0	0	chr10	+	57501370	57501431	0	2
Hsf2	e7.0	16241	16328	1.18241	0.0398421	chr10:57486383-57513143	heat shock factor 2	---	0	0	1	0	0	0	0	0	0	chr10	+	57502623	57502710	0	2
Hsf2	e8.0	18200	18348	-1.12417	0.522048	chr10:57486383-57513143	heat shock factor 2	---	0	0	1	0	0	0	0	0	0	chr10	+	57504582	57504730	0	2
Hsf2	e9.0	18764	19000	1.03811	0.633828	chr10:57486383-57513143	heat shock factor 2	---	1	0	1	0	0	0	0	0	0	chr10	+	57505146	57505382	0	1
Hsf2	e10.0	19815	19920	-1.19045	0.187789	chr10:57486383-57513143	heat shock factor 2	---	1	0	1	0	0	0	0	0	0	chr10	+	57506197	57506302	0	1
Pkib	e1.0	1	233	-1.07835	0.58182	chr10:57631975-57741112	protein kinase inhibitor beta, cAMP dependent, testis specific	---	0	0	1	0	0	0	0	0	0	chr10	+	57631975	57632207	0	0
Gcc2	e1.0	1	69	-2.00881	0.0201716	chr10:58255503-58305598	GRIP and coiled-coil domain containing 2	ENSMUSG00000038039	0	0	1	0	0	0	0	0	0	chr10	+	58255503	58255571	0	0
Gcc2	e2.0	327	380	-1.58334	0.270926	chr10:58255503-58305598	GRIP and coiled-coil domain containing 2	ENSMUSG00000038039	0	0	1	0	0	0	0	0	0	chr10	+	58255829	58255882	0	1
Gcc2	e3.0	1318	1402	-1.86452	0.268081	chr10:58255503-58305598	GRIP and coiled-coil domain containing 2	ENSMUSG00000038039	1	0	1	0	0	0	0	0	0	chr10	+	58256820	58256904	0	1
Gcc2	e4.0	2739	2806	-1.9886	0.144581	chr10:58255503-58305598	GRIP and coiled-coil domain containing 2	ENSMUSG00000038039	1	0	1	0	0	0	0	0	0	chr10	+	58258241	58258308	0	1
Gcc2	e5.0	12465	12569	-2.25283	0.135366	chr10:58255503-58305598	GRIP and coiled-coil domain containing 2	ENSMUSG00000038039	1	0	1	0	0	0	0	0	0	chr10	+	58267967	58268071	0	1
Gcc2	e6.0	13760	16204	-1.77054	0.0312452	chr10:58255503-58305598	GRIP and coiled-coil domain containing 2	ENSMUSG00000038039	1	0	1	0	0	0	0	0	0	chr10	+	58269262	58271706	0	0
Gcc2	e7.0	16831	16903	-1.36475	0.0683091	chr10:58255503-58305598	GRIP and coiled-coil domain containing 2	ENSMUSG00000038039	1	0	1	0	0	0	0	0	0	chr10	+	58272333	58272405	0	0
Gcc2	e8.0	19234	19334	-1.75571	0.27559	chr10:58255503-58305598	GRIP and coiled-coil domain containing 2	ENSMUSG00000038039	1	0	1	0	0	0	0	0	0	chr10	+	58274736	58274836	0	1
Gcc2	e9.0	19434	19532	-1.5246	0.211026	chr10:58255503-58305598	GRIP and coiled-coil domain containing 2	ENSMUSG00000038039	1	0	1	0	0	0	0	0	0	chr10	+	58274936	58275034	0	1
Gcc2	e10.0	21076	21195	-1.18274	0.586919	chr10:58255503-58305598	GRIP and coiled-coil domain containing 2	ENSMUSG00000038039	1	0	1	0	0	0	0	0	0	chr10	+	58276578	58276697	0	0
Gcc2	e11.0	23285	23449	-1.90296	0.25016	chr10:58255503-58305598	GRIP and coiled-coil domain containing 2	ENSMUSG00000038039	1	0	1	0	0	0	0	0	0	chr10	+	58278787	58278951	0	0
Gcc2	e12.0	25090	25194	-1.215	0.212118	chr10:58255503-58305598	GRIP and coiled-coil domain containing 2	ENSMUSG00000038039	1	0	1	0	0	0	0	0	0	chr10	+	58280592	58280696	0	0
Gcc2	e13.0	25855	26017	1.01217	0.964123	chr10:58255503-58305598	GRIP and coiled-coil domain containing 2	ENSMUSG00000038039	1	0	1	0	0	0	0	0	0	chr10	+	58281357	58281519	0	1
Gcc2	e14.0	30441	30541	-1.17268	0.496819	chr10:58255503-58305598	GRIP and coiled-coil domain containing 2	ENSMUSG00000038039	1	0	1	0	0	0	0	0	0	chr10	+	58285943	58286043	0	1
Gcc2	e15.0	30631	30708	-1.16219	0.622727	chr10:58255503-58305598	GRIP and coiled-coil domain containing 2	ENSMUSG00000038039	1	0	1	0	0	0	0	0	0	chr10	+	58286133	58286210	0	1
Gcc2	e16.0	31640	31777	-1.33887	0.373914	chr10:58255503-58305598	GRIP and coiled-coil domain containing 2	ENSMUSG00000038039	1	0	1	0	0	0	0	0	0	chr10	+	58287142	58287279	0	1
Gcc2	e17.0	33131	33252	-1.07904	0.795653	chr10:58255503-58305598	GRIP and coiled-coil domain containing 2	ENSMUSG00000038039	1	0	1	0	0	0	0	0	0	chr10	+	58288633	58288754	0	1
Gcc2	e18.0	34798	34974	1.31549	0.40236	chr10:58255503-58305598	GRIP and coiled-coil domain containing 2	ENSMUSG00000038039	1	0	1	0	0	0	0	0	0	chr10	+	58290300	58290476	0	1
Gcc2	e19.0	37063	37280	-1.03993	0.841683	chr10:58255503-58305598	GRIP and coiled-coil domain containing 2	ENSMUSG00000038039	1	0	1	0	0	0	0	0	0	chr10	+	58292565	58292782	0	1
Gcc2	e20.0	39209	39403	-1.06015	0.764164	chr10:58255503-58305598	GRIP and coiled-coil domain containing 2	ENSMUSG00000038039	1	0	1	0	0	0	0	0	0	chr10	+	58294711	58294905	0	1
Gcc2	e21.0	40586	40737	-1.03868	0.578024	chr10:58255503-58305598	GRIP and coiled-coil domain containing 2	ENSMUSG00000038039	1	0	1	0	0	0	0	0	0	chr10	+	58296088	58296239	0	1
Lims1	e5.0	75558	75717	1.08607	0.596335	chr10:58323464-58424691	LIM and senescent cell antigen-like domains 1	---	0	0	1	0	0	0	0	0	0	chr10	+	58399021	58399180	0	2
Lims1	e6.0	84607	84673	-1.07803	0.766423	chr10:58323464-58424691	LIM and senescent cell antigen-like domains 1	---	1	0	1	0	0	0	0	0	0	chr10	+	58408070	58408136	0	2
Lims1	e7.0	86097	86217	-1.75125	0.238313	chr10:58323464-58424691	LIM and senescent cell antigen-like domains 1	---	1	0	1	0	0	0	0	0	0	chr10	+	58409560	58409680	0	2
Lims1	e8.0	86590	86739	-1.06655	0.752159	chr10:58323464-58424691	LIM and senescent cell antigen-like domains 1	---	1	0	1	0	0	0	0	0	0	chr10	+	58410053	58410202	0	2
Lims1	e9.0	88940	89090	-1.39165	0.271349	chr10:58323464-58424691	LIM and senescent cell antigen-like domains 1	---	1	0	1	0	0	0	0	0	0	chr10	+	58412403	58412553	0	2
Lims1	e10.0	90510	90602	1.18039	0.343664	chr10:58323464-58424691	LIM and senescent cell antigen-like domains 1	---	1	0	1	0	0	0	0	0	0	chr10	+	58413973	58414065	0	2
Lims1	e11.0	93171	93219	1.28624	0.158248	chr10:58323464-58424691	LIM and senescent cell antigen-like domains 1	---	1	0	1	0	0	0	0	0	0	chr10	+	58416634	58416682	0	2
Ranbp2	e3.0	5133	5200	-3.26896	0.0137734	chr10:58446852-58494155	RAN binding protein 2	ENSMUSG00000003226	0	0	1	0	0	0	0	0	0	chr10	+	58451984	58452051	0	0
Ranbp2	e4.0	6461	6572	-1.83849	0.195532	chr10:58446852-58494155	RAN binding protein 2	ENSMUSG00000003226	0	0	1	0	0	0	0	0	0	chr10	+	58453312	58453423	0	0
Ranbp2	e5.0	7722	7874	1.02537	0.963224	chr10:58446852-58494155	RAN binding protein 2	ENSMUSG00000003226	0	0	1	0	0	0	0	0	0	chr10	+	58454573	58454725	0	0
Ranbp2	e6.0	8368	8598	-1.164	0.661245	chr10:58446852-58494155	RAN binding protein 2	ENSMUSG00000003226	0	0	1	0	0	0	0	0	0	chr10	+	58455219	58455449	0	0
Ranbp2	e7.0	8958	9103	1.46537	0.329676	chr10:58446852-58494155	RAN binding protein 2	ENSMUSG00000003226	0	0	1	0	0	0	0	0	0	chr10	+	58455809	58455954	0	0
Ranbp2	e8.0	10741	10933	-1.51323	0.370708	chr10:58446852-58494155	RAN binding protein 2	ENSMUSG00000003226	0	0	1	0	0	0	0	0	0	chr10	+	58457592	58457784	0	0
Ranbp2	e9.0	13667	13754	-1.59373	0.300233	chr10:58446852-58494155	RAN binding protein 2	ENSMUSG00000003226	1	0	1	0	0	0	0	0	0	chr10	+	58460518	58460605	0	0
Ranbp2	e10.0	14985	15194	-1.95433	0.143477	chr10:58446852-58494155	RAN binding protein 2	ENSMUSG00000003226	1	0	1	0	0	0	0	0	0	chr10	+	58461836	58462045	0	0
Ranbp2	e11.0	16968	17149	1.0374	0.907058	chr10:58446852-58494155	RAN binding protein 2	ENSMUSG00000003226	1	0	1	0	0	0	0	0	0	chr10	+	58463819	58464000	0	0
Ranbp2	e12.0	17232	17407	-2.02554	0.136777	chr10:58446852-58494155	RAN binding protein 2	ENSMUSG00000003226	1	0	1	0	0	0	0	0	0	chr10	+	58464083	58464258	0	0
Ranbp2	e13.0	17554	17677	-2.12119	0.0552074	chr10:58446852-58494155	RAN binding protein 2	ENSMUSG00000003226	1	0	1	0	0	0	0	0	0	chr10	+	58464405	58464528	0	0
Ranbp2	e14.0	18214	18375	-2.35178	0.1091	chr10:58446852-58494155	RAN binding protein 2	ENSMUSG00000003226	1	0	1	0	0	0	0	0	0	chr10	+	58465065	58465226	0	0
Ranbp2	e15.0	18593	18730	-5.34078	0.000878942	chr10:58446852-58494155	RAN binding protein 2	ENSMUSG00000003226	1	0	1	0	0	0	0	0	0	chr10	+	58465444	58465581	0	0
Ranbp2	e16.0	18812	18958	-2.25354	0.153876	chr10:58446852-58494155	RAN binding protein 2	ENSMUSG00000003226	1	0	1	0	0	0	0	0	0	chr10	+	58465663	58465809	0	0
Ranbp2	e17.0	20264	20443	-1.42739	0.337487	chr10:58446852-58494155	RAN binding protein 2	ENSMUSG00000003226	1	0	1	0	0	0	0	0	0	chr10	+	58467115	58467294	0	0
Ranbp2	e18.0	20539	20622	-1.72393	0.178926	chr10:58446852-58494155	RAN binding protein 2	ENSMUSG00000003226	1	0	1	0	0	0	0	0	0	chr10	+	58467390	58467473	0	0
Ranbp2	e19.0	23776	23911	-1.51416	0.127869	chr10:58446852-58494155	RAN binding protein 2	ENSMUSG00000003226	1	0	1	0	0	0	0	0	0	chr10	+	58470627	58470762	0	0
Ranbp2	e20.0	28393	28487	-1.43912	0.0267823	chr10:58446852-58494155	RAN binding protein 2	ENSMUSG00000003226	1	0	1	0	0	0	0	0	0	chr10	+	58475244	58475338	0	0
Ranbp2	e23.0	36178	36348	1.07895	0.596394	chr10:58446852-58494155	RAN binding protein 2	ENSMUSG00000003226	1	0	1	0	0	0	0	0	0	chr10	+	58483029	58483199	0	0
Ranbp2	e24.0	37046	37132	1.33609	0.205895	chr10:58446852-58494155	RAN binding protein 2	ENSMUSG00000003226	1	0	1	0	0	0	0	0	0	chr10	+	58483897	58483983	0	0
Ranbp2	e25.0	37591	37769	1.27624	0.0415471	chr10:58446852-58494155	RAN binding protein 2	ENSMUSG00000003226	1	0	1	0	0	0	0	0	0	chr10	+	58484442	58484620	0	0
Ranbp2	e26.0	38829	39030	-1.04059	0.836616	chr10:58446852-58494155	RAN binding protein 2	ENSMUSG00000003226	1	0	1	0	0	0	0	0	0	chr10	+	58485680	58485881	0	0
Sh3rf3	e1.0	1	768	1.04182	0.865532	chr10:58813359-59138915	SH3 domain containing ring finger 3	ENSMUSG00000037990	0	0	1	0	0	0	0	0	0	chr10	+	58813359	58814126	0	0
Sh3rf3	e2.0	170563	170838	-1.02559	0.874085	chr10:58813359-59138915	SH3 domain containing ring finger 3	ENSMUSG00000037990	0	0	1	0	0	0	0	0	0	chr10	+	58983921	58984196	0	2
Sh3rf3	e3.0	193684	193779	1.23421	0.170382	chr10:58813359-59138915	SH3 domain containing ring finger 3	ENSMUSG00000037990	0	0	1	0	0	0	0	0	0	chr10	+	59007042	59007137	0	2
Sh3rf3	e4.0	235863	236222	-1.00042	0.997896	chr10:58813359-59138915	SH3 domain containing ring finger 3	ENSMUSG00000037990	0	0	1	0	0	0	0	0	0	chr10	+	59049221	59049580	0	2
Ascc1	e1.0	1	104	-1.13094	0.518263	chr10:60002804-60099990	activating signal cointegrator 1 complex subunit 1	---	0	0	1	0	0	0	0	0	0	chr10	+	60002804	60002907	0	0
Ascc1	e2.0	524	613	1.20588	0.539737	chr10:60002804-60099990	activating signal cointegrator 1 complex subunit 1	---	0	0	1	0	0	0	0	0	0	chr10	+	60003327	60003416	0	0
Psap	e1.0	1	155	-1.06826	0.599181	chr10:60277628-60302604	prosaposin	---	0	0	1	0	0	0	0	0	0	chr10	+	60277628	60277782	0	0
Aifm2	e1.0	1	90	1.34284	0.252994	chr10:61715263-61742008	apoptosis-inducing factor, mitochondrion-associated 2	---	0	0	1	0	0	0	0	0	0	chr10	+	61715263	61715352	0	0
Rufy2	e1.0	1	111	-1.42244	0.129743	chr10:62980222-63018717	RUN and FYVE domain-containing 2	---	0	0	1	0	0	0	0	0	0	chr10	+	62980222	62980332	0	0
Rufy2	e2.0	2450	2623	-1.03723	0.720053	chr10:62980222-63018717	RUN and FYVE domain-containing 2	---	0	0	1	0	0	0	0	0	0	chr10	+	62982671	62982844	0	2
Rufy2	e3.0	8902	9019	1.03109	0.788968	chr10:62980222-63018717	RUN and FYVE domain-containing 2	---	0	0	1	0	0	0	0	0	0	chr10	+	62989123	62989240	0	2
Rufy2	e4.0	10759	10860	1.03397	0.678326	chr10:62980222-63018717	RUN and FYVE domain-containing 2	---	1	0	1	0	0	0	0	0	0	chr10	+	62990980	62991081	0	1
Rufy2	e5.0	12896	13019	-1.01444	0.795233	chr10:62980222-63018717	RUN and FYVE domain-containing 2	---	1	0	1	0	0	0	0	0	0	chr10	+	62993117	62993240	0	1
Rufy2	e6.0	13759	13820	1.07166	0.395951	chr10:62980222-63018717	RUN and FYVE domain-containing 2	---	1	0	1	0	0	0	0	0	0	chr10	+	62993980	62994041	0	1
Rufy2	e7.0	14484	14549	-1.11066	0.464097	chr10:62980222-63018717	RUN and FYVE domain-containing 2	---	1	0	1	0	0	0	0	0	0	chr10	+	62994705	62994770	0	1
Rufy2	e8.0	15089	15158	1.08547	0.500048	chr10:62980222-63018717	RUN and FYVE domain-containing 2	---	1	0	1	0	0	1	0	0	0	chr10	+	62995310	62995379	0	1
Rufy2	e9.0	17660	17761	1.07922	0.473822	chr10:62980222-63018717	RUN and FYVE domain-containing 2	---	1	0	1	0	0	0	0	0	0	chr10	+	62997881	62997982	0	1
Rufy2	e10.0	17858	17974	-1.04681	0.6093	chr10:62980222-63018717	RUN and FYVE domain-containing 2	---	1	0	1	0	0	0	0	0	0	chr10	+	62998079	62998195	0	1
Rufy2	e11.0	20012	20179	-1.05095	0.210364	chr10:62980222-63018717	RUN and FYVE domain-containing 2	---	1	0	1	0	0	0	0	0	0	chr10	+	63000233	63000400	0	1
Rufy2	e12.0	21962	22059	1.10109	0.351829	chr10:62980222-63018717	RUN and FYVE domain-containing 2	---	1	0	1	0	0	0	0	0	0	chr10	+	63002183	63002280	0	0
Rufy2	e13.0	22725	24245	1.09817	0.279661	chr10:62980222-63018717	RUN and FYVE domain-containing 2	---	1	0	1	1	0	0	0	0	0	chr10	+	63002946	63004466	0	0
Rufy2	e14.0	24436	24555	-1.2223	0.60926	chr10:62980222-63018717	RUN and FYVE domain-containing 2	---	1	0	1	0	0	0	0	0	0	chr10	+	63004657	63004776	0	0
Herc4	e1.0	1	367	1.08761	0.707919	chr10:63243797-63317881	hect domain and RLD 4	---	0	0	1	0	0	0	0	0	0	chr10	+	63243797	63244163	0	0
Herc4	e2.0	1622	1652	1.07308	0.487408	chr10:63243797-63317881	hect domain and RLD 4	---	0	0	1	0	0	0	0	0	0	chr10	+	63245418	63245448	0	1
Herc4	e3.0	2026	2329	-1.03844	0.712242	chr10:63243797-63317881	hect domain and RLD 4	---	0	0	1	0	0	0	0	0	0	chr10	+	63245822	63246125	0	1
Herc4	e4.0	20230	20389	-1.03765	0.747874	chr10:63243797-63317881	hect domain and RLD 4	---	0	0	1	0	0	0	0	0	0	chr10	+	63264026	63264185	0	1
Herc4	e5.0	25832	25908	-1.02081	0.909613	chr10:63243797-63317881	hect domain and RLD 4	---	1	0	1	0	0	0	0	0	0	chr10	+	63269628	63269704	0	1
Herc4	e7.0	29655	29876	-1.08921	0.325612	chr10:63243797-63317881	hect domain and RLD 4	---	1	0	1	0	0	0	0	0	0	chr10	+	63273451	63273672	0	1
Herc4	e8.0	31201	31292	-1.02233	0.897579	chr10:63243797-63317881	hect domain and RLD 4	---	1	0	1	0	0	0	0	0	0	chr10	+	63274997	63275088	0	1
Herc4	e9.0	34539	34669	1.02272	0.819246	chr10:63243797-63317881	hect domain and RLD 4	---	1	0	1	0	0	0	0	0	0	chr10	+	63278335	63278465	0	1
Herc4	e10.0	39385	39545	-1.13685	0.198268	chr10:63243797-63317881	hect domain and RLD 4	---	1	0	1	0	0	0	0	0	0	chr10	+	63283181	63283341	0	1
Herc4	e12.0	41856	41932	-1.16066	0.119843	chr10:63243797-63317881	hect domain and RLD 4	---	1	0	1	0	0	0	0	0	0	chr10	+	63285652	63285728	0	1
Dnajc12	e1.0	1	76	1.03269	0.921573	chr10:63382443-63408840	DnaJ heat shock protein family (Hsp40) member C12	---	0	0	1	0	0	0	0	0	0	chr10	+	63382443	63382518	0	0
Dnajc12	e2.0	4121	4333	-1.0029	0.944616	chr10:63382443-63408840	DnaJ heat shock protein family (Hsp40) member C12	---	0	0	1	0	0	0	0	0	0	chr10	+	63386563	63386775	0	0
Jmjd1c	e5.0	93612	93725	-1.15141	0.748129	chr10:67096125-67256326	jumonji domain containing 1C	---	1	0	1	0	0	0	0	0	0	chr10	+	67189736	67189849	0	0
Jmjd1c	e6.0	119146	119251	-1.22111	0.682616	chr10:67096125-67256326	jumonji domain containing 1C	---	1	0	1	0	0	0	0	0	0	chr10	+	67215270	67215375	0	0
Jmjd1c	e7.0	120859	120983	1.04241	0.922558	chr10:67096125-67256326	jumonji domain containing 1C	---	1	0	1	0	0	0	0	0	0	chr10	+	67216983	67217107	0	0
Jmjd1c	e9.0	122153	122345	-1.04216	0.914985	chr10:67096125-67256326	jumonji domain containing 1C	---	1	0	1	0	0	0	0	0	0	chr10	+	67218277	67218469	0	0
Jmjd1c	e10.0	122830	124511	-1.17452	0.210292	chr10:67096125-67256326	jumonji domain containing 1C	---	1	0	1	0	0	0	0	0	0	chr10	+	67218954	67220635	0	0
Jmjd1c	e11.0	127885	128057	-1.23271	0.551103	chr10:67096125-67256326	jumonji domain containing 1C	---	1	0	1	0	0	0	0	0	0	chr10	+	67224009	67224181	0	0
Jmjd1c	e12.0	128613	130795	-1.36039	0.0758371	chr10:67096125-67256326	jumonji domain containing 1C	---	1	0	1	0	0	0	0	0	0	chr10	+	67224737	67226919	0	0
Jmjd1c	e13.0	133724	133925	-1.0999	0.584447	chr10:67096125-67256326	jumonji domain containing 1C	---	1	0	1	0	0	0	0	0	0	chr10	+	67229848	67230049	0	0
Jmjd1c	e14.0	135848	136062	-1.09441	0.575367	chr10:67096125-67256326	jumonji domain containing 1C	---	1	0	1	0	0	0	0	0	0	chr10	+	67231972	67232186	0	0
Jmjd1c	e15.0	137247	137399	-1.18997	0.13747	chr10:67096125-67256326	jumonji domain containing 1C	---	1	0	1	0	0	0	0	0	0	chr10	+	67233371	67233523	0	0
Jmjd1c	e16.0	141984	142073	-1.15698	0.295016	chr10:67096125-67256326	jumonji domain containing 1C	---	1	0	1	0	0	0	0	0	0	chr10	+	67238108	67238197	0	0
Jmjd1c	e17.0	142683	142810	-1.04218	0.882447	chr10:67096125-67256326	jumonji domain containing 1C	---	1	0	1	0	0	0	0	0	0	chr10	+	67238807	67238934	0	0
Jmjd1c	e19.0	143738	143952	-1.17468	0.372945	chr10:67096125-67256326	jumonji domain containing 1C	---	1	0	1	1	0	0	0	0	0	chr10	+	67239862	67240076	0	0
Jmjd1c	e20.0	144539	144817	1.05022	0.444914	chr10:67096125-67256326	jumonji domain containing 1C	---	1	0	1	1	0	0	0	0	0	chr10	+	67240663	67240941	0	0
Jmjd1c	e21.0	147648	147816	1.17113	0.20024	chr10:67096125-67256326	jumonji domain containing 1C	---	1	0	1	1	0	0	0	0	0	chr10	+	67243772	67243940	0	0
Ank3	e1.0	1	577	-2.02709	0.155847	chr10:69533708-70027438	ankyrin 3, epithelial	---	0	0	1	0	0	0	0	0	0	chr10	+	69533708	69534284	0	0
Ank3	e2.0	172588	173218	-1.26556	0.626917	chr10:69533708-70027438	ankyrin 3, epithelial	---	0	0	1	0	0	0	0	0	0	chr10	+	69706295	69706925	0	0
Ank3	e4.0	274709	274810	-1.86486	0.079524	chr10:69533708-70027438	ankyrin 3, epithelial	---	1	0	1	0	0	1	0	0	0	chr10	+	69808416	69808517	0	0
Ank3	e5.0	275166	275264	-1.54878	0.253257	chr10:69533708-70027438	ankyrin 3, epithelial	---	1	0	1	0	0	1	0	0	0	chr10	+	69808873	69808971	0	0
Ank3	e6.0	275464	275562	1.03957	0.864863	chr10:69533708-70027438	ankyrin 3, epithelial	---	1	0	1	0	0	1	0	0	0	chr10	+	69809171	69809269	0	0
Ank3	e7.0	281988	282086	1.71125	0.0329403	chr10:69533708-70027438	ankyrin 3, epithelial	---	1	0	1	0	0	1	0	0	0	chr10	+	69815695	69815793	0	0
Ank3	e8.0	288501	288686	1.18165	0.659355	chr10:69533708-70027438	ankyrin 3, epithelial	---	1	0	1	0	0	1	0	0	0	chr10	+	69822208	69822393	0	0
Ank3	e9.0	290611	290709	1.37395	0.182057	chr10:69533708-70027438	ankyrin 3, epithelial	---	1	0	1	0	0	1	0	0	0	chr10	+	69824318	69824416	0	0
Ank3	e10.0	316399	316497	1.00452	0.989545	chr10:69533708-70027438	ankyrin 3, epithelial	---	1	0	1	0	0	1	0	0	0	chr10	+	69850106	69850204	0	0
Ank3	e12.0	333678	333776	-1.44222	0.299188	chr10:69533708-70027438	ankyrin 3, epithelial	---	1	0	1	0	0	1	0	0	0	chr10	+	69867385	69867483	0	0
Ank3	e13.0	337295	337492	-1.05188	0.838189	chr10:69533708-70027438	ankyrin 3, epithelial	---	1	0	1	0	0	1	0	0	0	chr10	+	69871002	69871199	0	0
Ank3	e14.0	341083	341181	-1.05553	0.823558	chr10:69533708-70027438	ankyrin 3, epithelial	---	1	0	1	0	0	1	0	0	0	chr10	+	69874790	69874888	0	0
Ank3	e15.0	344123	344221	1.01828	0.949689	chr10:69533708-70027438	ankyrin 3, epithelial	---	1	0	1	0	0	1	0	0	0	chr10	+	69877830	69877928	0	0
Ank3	e16.0	346186	346284	-1.14508	0.482875	chr10:69533708-70027438	ankyrin 3, epithelial	---	1	0	1	0	0	1	0	0	0	chr10	+	69879893	69879991	0	0
Ank3	e17.0	348654	348851	-1.25089	0.373883	chr10:69533708-70027438	ankyrin 3, epithelial	---	1	0	1	0	0	1	0	0	0	chr10	+	69882361	69882558	0	0
Ank3	e18.0	351040	351138	-1.29878	0.285346	chr10:69533708-70027438	ankyrin 3, epithelial	---	1	0	1	0	0	1	0	0	0	chr10	+	69884747	69884845	0	0
Ank3	e19.0	351432	351530	1.42235	0.0527264	chr10:69533708-70027438	ankyrin 3, epithelial	---	1	0	1	0	0	1	0	0	0	chr10	+	69885139	69885237	0	0
Ank3	e20.0	358615	358812	-1.02682	0.891955	chr10:69533708-70027438	ankyrin 3, epithelial	---	1	0	1	0	0	1	0	0	0	chr10	+	69892322	69892519	0	0
Ank3	e21.0	359738	359836	-1.79097	0.138916	chr10:69533708-70027438	ankyrin 3, epithelial	---	1	0	1	0	0	1	0	0	0	chr10	+	69893445	69893543	0	0
Ank3	e22.0	364334	364432	-2.17739	0.0931708	chr10:69533708-70027438	ankyrin 3, epithelial	---	1	0	1	0	0	1	0	0	0	chr10	+	69898041	69898139	0	0
Ank3	e23.0	364521	364619	-1.66619	0.299488	chr10:69533708-70027438	ankyrin 3, epithelial	---	1	0	1	0	0	1	0	0	0	chr10	+	69898228	69898326	0	0
Ank3	e24.0	365287	365382	-1.43946	0.183993	chr10:69533708-70027438	ankyrin 3, epithelial	---	1	0	1	0	0	1	0	0	0	chr10	+	69898994	69899089	0	0
Ank3	e25.0	370491	370563	-1.12954	0.684669	chr10:69533708-70027438	ankyrin 3, epithelial	---	1	0	1	0	0	1	0	0	0	chr10	+	69904198	69904270	0	0
Ank3	e29.0	393988	394111	1.1126	0.735568	chr10:69533708-70027438	ankyrin 3, epithelial	---	1	0	1	0	0	1	0	0	0	chr10	+	69927695	69927818	0	1
Ank3	e30.0	398687	398789	-1.27822	0.0671767	chr10:69533708-70027438	ankyrin 3, epithelial	---	1	0	1	0	0	1	0	0	0	chr10	+	69932394	69932496	0	1
Ank3	e31.0	417245	417351	-1.14757	0.49019	chr10:69533708-70027438	ankyrin 3, epithelial	---	1	0	1	0	0	0	0	0	0	chr10	+	69950952	69951058	0	1
Ank3	e32.0	419733	419765	-1.04359	0.835216	chr10:69533708-70027438	ankyrin 3, epithelial	---	1	0	1	0	0	1	0	0	0	chr10	+	69953440	69953472	0	0
Ank3	e33.0	422219	422443	-1.31073	0.317082	chr10:69533708-70027438	ankyrin 3, epithelial	---	1	0	1	0	0	0	0	0	0	chr10	+	69955926	69956150	0	1
Ank3	e34.0	425211	425365	-1.24094	0.23819	chr10:69533708-70027438	ankyrin 3, epithelial	---	1	0	1	0	0	0	0	0	0	chr10	+	69958918	69959072	0	1
Ank3	e35.0	440015	440226	-1.87793	0.063796	chr10:69533708-70027438	ankyrin 3, epithelial	---	1	0	1	0	0	0	0	0	0	chr10	+	69973722	69973933	0	1
Ank3	e36.0	442341	442548	1.05595	0.73506	chr10:69533708-70027438	ankyrin 3, epithelial	---	1	0	1	0	0	0	0	0	0	chr10	+	69976048	69976255	0	1
Ank3	e37.0	444006	444102	1.04873	0.875471	chr10:69533708-70027438	ankyrin 3, epithelial	---	1	0	1	0	0	0	0	0	0	chr10	+	69977713	69977809	0	1
Ank3	e38.0	444764	444992	1.00196	0.990927	chr10:69533708-70027438	ankyrin 3, epithelial	---	1	0	1	0	0	0	0	0	0	chr10	+	69978471	69978699	0	1
Ank3	e39.0	445611	445736	1.24768	0.415093	chr10:69533708-70027438	ankyrin 3, epithelial	---	1	0	1	0	0	0	0	0	0	chr10	+	69979318	69979443	0	1
Ank3	e40.0	446565	446687	-1.04902	0.839851	chr10:69533708-70027438	ankyrin 3, epithelial	---	1	0	1	0	0	0	0	0	0	chr10	+	69980272	69980394	0	1
Ank3	e41.0	448409	448490	-1.17894	0.276068	chr10:69533708-70027438	ankyrin 3, epithelial	---	1	0	1	0	0	0	0	0	0	chr10	+	69982116	69982197	0	1
Ank3	e42.0	456228	458768	-1.5093	0.00893769	chr10:69533708-70027438	ankyrin 3, epithelial	---	0	0	1	0	0	0	0	0	0	chr10	+	69989935	69992475	0	0
Ank3	e43.0	459838	460055	-1.52243	0.408202	chr10:69533708-70027438	ankyrin 3, epithelial	---	0	0	1	0	0	0	0	0	0	chr10	+	69993545	69993762	0	0
Ank3	e44.0	460665	460739	-1.0781	0.487047	chr10:69533708-70027438	ankyrin 3, epithelial	---	1	0	1	0	0	0	0	0	0	chr10	+	69994372	69994446	0	1
Ank3	e45.0	464388	464519	1.04088	0.799051	chr10:69533708-70027438	ankyrin 3, epithelial	---	1	0	1	0	0	0	0	0	0	chr10	+	69998095	69998226	0	1
Ank3	e46.0	465648	465791	-1.21198	0.13977	chr10:69533708-70027438	ankyrin 3, epithelial	---	1	0	1	0	0	0	0	0	0	chr10	+	69999355	69999498	0	1
Fam13c	e1.0	1	232	-1.31369	0.373946	chr10:70440667-70558933	family with sequence similarity 13, member C	---	0	0	1	0	0	0	0	0	0	chr10	+	70440667	70440898	0	0
Zwint	e1.0	1	132	1.02661	0.157031	chr10:72654846-72674963	ZW10 interactor	---	0	0	1	0	0	0	0	0	0	chr10	+	72654846	72654977	0	0
Zwint	e2.0	1138	1228	1.03353	0.0245293	chr10:72654846-72674963	ZW10 interactor	---	0	0	1	0	0	0	0	0	0	chr10	+	72655983	72656073	0	2
Zwint	e3.0	1393	1516	-1.0052	0.781707	chr10:72654846-72674963	ZW10 interactor	---	0	0	1	0	0	0	0	0	0	chr10	+	72656238	72656361	0	2
Zwint	e4.0	1685	1851	-1.01982	0.137044	chr10:72654846-72674963	ZW10 interactor	---	0	0	1	0	0	0	0	0	0	chr10	+	72656530	72656696	0	2
Zwint	e5.0	1972	2028	1.00466	0.741952	chr10:72654846-72674963	ZW10 interactor	---	0	0	1	0	0	0	0	0	0	chr10	+	72656817	72656873	0	2
Zwint	e7.0	2421	2543	-1.00139	0.920384	chr10:72654846-72674963	ZW10 interactor	---	0	0	1	0	0	0	0	0	0	chr10	+	72657266	72657388	0	2
Pcdh15	e30.0	772294	772382	-1.27211	0.671847	chr10:73821867-74649730	protocadherin 15	---	1	0	1	1	0	1	0	0	1	chr10	+	74594160	74594248	0	1
Pcdh15	e31.0	799333	799509	-1.49949	0.356463	chr10:73821867-74649730	protocadherin 15	---	1	0	1	0	0	1	0	0	1	chr10	+	74621199	74621375	0	1
Gnaz	e1.0	1	206	-1.05468	0.766295	chr10:74967177-75016904	guanine nucleotide binding protein, alpha z subunit	---	0	0	1	0	0	0	0	0	0	chr10	+	74967177	74967382	0	0
Gnaz	e2.0	11615	11680	-1.16594	0.301892	chr10:74967177-75016904	guanine nucleotide binding protein, alpha z subunit	---	0	0	1	1	0	1	0	0	0	chr10	+	74978791	74978856	0	0
Rab36	e1.0	1	264	1.25349	0.26573	chr10:75037058-75054747	RAB36, member RAS oncogene family	---	0	0	1	0	0	0	0	0	0	chr10	+	75037058	75037321	0	0
Bcr	e1.0	1	350	-1.36402	0.145311	chr10:75060896-75184923	BCR activator of RhoGEF and GTPase	ENSMUSG00000009681	0	0	1	0	0	0	0	0	0	chr10	+	75060896	75061245	0	0
Bcr	e2.0	810	1415	-1.18602	0.078155	chr10:75060896-75184923	BCR activator of RhoGEF and GTPase	ENSMUSG00000009681	0	0	1	0	0	0	0	0	0	chr10	+	75061705	75062310	0	0
Bcr	e3.0	64129	64301	-1.34121	0.145514	chr10:75060896-75184923	BCR activator of RhoGEF and GTPase	ENSMUSG00000009681	0	0	1	0	0	0	0	0	0	chr10	+	75125024	75125196	0	0
Bcr	e4.0	70126	70230	-1.2723	0.0268508	chr10:75060896-75184923	BCR activator of RhoGEF and GTPase	ENSMUSG00000009681	0	0	1	0	0	0	0	0	0	chr10	+	75131021	75131125	0	0
Bcr	e5.0	70604	70789	-1.16549	0.290007	chr10:75060896-75184923	BCR activator of RhoGEF and GTPase	ENSMUSG00000009681	0	0	1	0	0	0	0	0	0	chr10	+	75131499	75131684	0	0
Bcr	e6.0	74999	75106	-1.12951	0.143441	chr10:75060896-75184923	BCR activator of RhoGEF and GTPase	ENSMUSG00000009681	0	0	1	0	0	0	0	0	0	chr10	+	75135894	75136001	0	0
Bcr	e7.0	80095	80155	-1.19868	0.137923	chr10:75060896-75184923	BCR activator of RhoGEF and GTPase	ENSMUSG00000009681	0	0	1	0	0	0	0	0	0	chr10	+	75140990	75141050	0	0
Bcr	e8.0	82187	82239	-1.00812	0.936741	chr10:75060896-75184923	BCR activator of RhoGEF and GTPase	ENSMUSG00000009681	0	0	1	0	0	0	0	0	0	chr10	+	75143082	75143134	0	0
Bcr	e9.0	84427	84567	1.18424	0.137416	chr10:75060896-75184923	BCR activator of RhoGEF and GTPase	ENSMUSG00000009681	0	0	1	0	0	0	0	0	0	chr10	+	75145322	75145462	0	0
Bcr	e10.0	92991	93112	1.08082	0.391825	chr10:75060896-75184923	BCR activator of RhoGEF and GTPase	ENSMUSG00000009681	0	0	1	0	0	0	0	0	0	chr10	+	75153886	75154007	0	0
Bcr	e11.0	94003	94171	-1.17379	0.193115	chr10:75060896-75184923	BCR activator of RhoGEF and GTPase	ENSMUSG00000009681	0	0	1	0	0	0	0	0	0	chr10	+	75154898	75155066	0	0
Bcr	e12.0	96183	96302	-1.1489	0.155661	chr10:75060896-75184923	BCR activator of RhoGEF and GTPase	ENSMUSG00000009681	0	0	1	0	0	0	0	0	0	chr10	+	75157078	75157197	0	0
Bcr	e13.0	97115	97190	-1.0581	0.382045	chr10:75060896-75184923	BCR activator of RhoGEF and GTPase	ENSMUSG00000009681	0	0	1	0	0	0	0	0	0	chr10	+	75158010	75158085	0	1
Bcr	e14.0	98891	98995	-1.01331	0.794642	chr10:75060896-75184923	BCR activator of RhoGEF and GTPase	ENSMUSG00000009681	0	0	1	0	0	0	0	0	0	chr10	+	75159786	75159890	0	1
Bcr	e15.0	99435	99509	-1.04473	0.702579	chr10:75060896-75184923	BCR activator of RhoGEF and GTPase	ENSMUSG00000009681	0	0	1	0	0	0	0	0	0	chr10	+	75160330	75160404	0	1
Bcr	e16.0	105150	105247	1.04285	0.719214	chr10:75060896-75184923	BCR activator of RhoGEF and GTPase	ENSMUSG00000009681	0	0	1	0	0	0	0	0	0	chr10	+	75166045	75166142	0	1
Bcr	e17.0	107212	107343	-1.06875	0.566092	chr10:75060896-75184923	BCR activator of RhoGEF and GTPase	ENSMUSG00000009681	0	0	1	0	0	0	0	0	0	chr10	+	75168107	75168238	0	1
Specc1l	e6.0	18612	18801	-2.30504	0.231041	chr10:75212071-75312399	sperm antigen with calponin homology and coiled-coil domains 1-like	---	0	0	1	0	0	0	0	0	0	chr10	+	75230682	75230871	0	1
Specc1l	e7.0	28995	29148	1.04632	0.812198	chr10:75212071-75312399	sperm antigen with calponin homology and coiled-coil domains 1-like	---	0	0	1	0	0	0	0	0	0	chr10	+	75241065	75241218	0	1
Specc1l	e8.0	33009	34642	-1.03033	0.249972	chr10:75212071-75312399	sperm antigen with calponin homology and coiled-coil domains 1-like	---	1	0	1	0	0	0	0	0	0	chr10	+	75245079	75246712	0	1
Specc1l	e9.0	36367	36574	1.13652	0.476702	chr10:75212071-75312399	sperm antigen with calponin homology and coiled-coil domains 1-like	---	1	0	1	0	0	0	0	0	0	chr10	+	75248437	75248644	0	1
Specc1l	e10.0	45798	45871	1.06899	0.849424	chr10:75212071-75312399	sperm antigen with calponin homology and coiled-coil domains 1-like	---	1	0	1	0	0	0	0	0	0	chr10	+	75257868	75257941	0	0
Specc1l	e11.0	46898	47073	1.5766	0.0625368	chr10:75212071-75312399	sperm antigen with calponin homology and coiled-coil domains 1-like	---	1	0	1	0	0	0	0	0	0	chr10	+	75258968	75259143	0	0
Specc1l	e12.0	49724	49887	-1.02355	0.929509	chr10:75212071-75312399	sperm antigen with calponin homology and coiled-coil domains 1-like	---	1	0	1	0	0	0	0	0	0	chr10	+	75261794	75261957	0	0
Specc1l	e13.0	51209	51300	1.04024	0.790107	chr10:75212071-75312399	sperm antigen with calponin homology and coiled-coil domains 1-like	---	1	0	1	0	0	0	0	0	0	chr10	+	75263279	75263370	0	0
Specc1l	e14.0	55429	55519	1.06268	0.762822	chr10:75212071-75312399	sperm antigen with calponin homology and coiled-coil domains 1-like	---	1	0	1	0	0	0	0	0	0	chr10	+	75267499	75267589	0	0
Specc1l	e15.0	61947	62030	1.07857	0.726078	chr10:75212071-75312399	sperm antigen with calponin homology and coiled-coil domains 1-like	---	1	0	1	0	0	0	0	0	0	chr10	+	75274017	75274100	0	0
Specc1l	e16.0	64701	64857	1.28122	0.331772	chr10:75212071-75312399	sperm antigen with calponin homology and coiled-coil domains 1-like	---	1	0	1	0	0	0	0	0	0	chr10	+	75276771	75276927	0	0
Lss	e1.0	1	70	1.02936	0.922903	chr10:76531605-76557138	lanosterol synthase	---	0	0	1	0	0	0	0	0	0	chr10	+	76531605	76531674	0	0
Lss	e2.0	246	414	1.20871	0.187319	chr10:76531605-76557138	lanosterol synthase	---	0	0	1	0	0	0	0	0	0	chr10	+	76531850	76532018	0	1
Lss	e3.0	1909	2047	-1.2721	0.153519	chr10:76531605-76557138	lanosterol synthase	---	0	0	1	0	0	0	0	0	0	chr10	+	76533513	76533651	0	1
Lss	e4.0	3955	4063	-1.31771	0.263697	chr10:76531605-76557138	lanosterol synthase	---	0	0	1	0	0	0	0	0	0	chr10	+	76535559	76535667	0	1
Lss	e5.0	4640	4761	-1.40197	0.085317	chr10:76531605-76557138	lanosterol synthase	---	0	0	1	0	0	0	0	0	0	chr10	+	76536244	76536365	0	1
Lss	e7.0	6748	6844	-1.01927	0.901748	chr10:76531605-76557138	lanosterol synthase	---	0	0	1	0	0	0	0	0	0	chr10	+	76538352	76538448	0	1
Lss	e8.0	8181	8316	-1.07067	0.627259	chr10:76531605-76557138	lanosterol synthase	---	0	0	1	0	0	0	0	0	0	chr10	+	76539785	76539920	0	1
Lss	e9.0	8708	8816	-1.19483	0.291361	chr10:76531605-76557138	lanosterol synthase	---	0	0	1	0	0	0	0	0	0	chr10	+	76540312	76540420	0	1
Lss	e10.0	9242	9360	1.1883	0.46477	chr10:76531605-76557138	lanosterol synthase	---	0	0	1	0	0	0	0	0	0	chr10	+	76540846	76540964	0	1
Lss	e11.0	10215	10312	1.22721	0.376472	chr10:76531605-76557138	lanosterol synthase	---	0	0	1	0	0	0	0	0	0	chr10	+	76541819	76541916	0	1
Lss	e12.0	10864	10891	1.28803	0.174086	chr10:76531605-76557138	lanosterol synthase	---	0	0	1	0	0	0	0	0	0	chr10	+	76542468	76542495	0	1
Lss	e13.0	12247	12303	1.33515	0.0572053	chr10:76531605-76557138	lanosterol synthase	---	0	0	1	0	0	0	0	0	0	chr10	+	76543851	76543907	0	1
Lss	e14.0	12861	12932	-1.02962	0.852218	chr10:76531605-76557138	lanosterol synthase	---	0	0	1	0	0	0	0	0	0	chr10	+	76544465	76544536	0	1
Lss	e15.0	13847	13897	1.0075	0.965865	chr10:76531605-76557138	lanosterol synthase	---	0	0	1	0	0	0	0	0	0	chr10	+	76545451	76545501	0	1
Lss	e16.0	14458	14607	-1.19292	0.422579	chr10:76531605-76557138	lanosterol synthase	---	0	0	1	0	0	0	0	0	0	chr10	+	76546062	76546211	0	1
Lss	e17.0	15159	15255	-1.16914	0.250631	chr10:76531605-76557138	lanosterol synthase	---	0	0	1	0	0	0	0	0	0	chr10	+	76546763	76546859	0	1
Lss	e18.0	15831	15936	1.13256	0.522097	chr10:76531605-76557138	lanosterol synthase	---	0	0	1	0	0	0	0	0	0	chr10	+	76547435	76547540	0	1
Lss	e19.0	17616	17681	1.29775	0.19484	chr10:76531605-76557138	lanosterol synthase	---	1	0	1	0	0	0	0	0	0	chr10	+	76549220	76549285	0	1
Lss	e20.0	18199	18279	1.13889	0.378112	chr10:76531605-76557138	lanosterol synthase	---	1	0	1	0	0	0	0	0	0	chr10	+	76549803	76549883	0	1
Lss	e21.0	18981	19151	1.28604	0.103347	chr10:76531605-76557138	lanosterol synthase	---	1	0	1	0	0	0	0	0	0	chr10	+	76550585	76550755	0	1
Slc19a1	e2.0	529	664	-1.01653	0.955246	chr10:77032684-77050432	solute carrier family 19 (folate transporter), member 1	---	0	0	1	0	0	0	0	0	0	chr10	+	77033212	77033347	0	0
Sumo3	e1.0	1	245	-1.17538	0.395372	chr10:77606097-77618331	small ubiquitin-like modifier 3	---	0	0	1	0	0	0	0	0	0	chr10	+	77606097	77606341	0	0
Sumo3	e2.0	502	872	-1.48168	0.0608582	chr10:77606097-77618331	small ubiquitin-like modifier 3	---	0	0	1	0	0	0	0	0	0	chr10	+	77606598	77606968	0	0
Sumo3	e3.0	3716	3844	-1.01494	0.755034	chr10:77606097-77618331	small ubiquitin-like modifier 3	---	0	0	1	0	0	0	0	0	0	chr10	+	77609812	77609940	0	2
Ube2g2	e1.0	1	118	1.02705	0.730082	chr10:77622299-77645995	ubiquitin-conjugating enzyme E2G 2	ENSMUSG00000009293	0	0	1	0	0	0	0	0	0	chr10	+	77622299	77622416	0	0
Cfap410	e1.0	1	142	-1.02579	0.858935	chr10:77978640-77986905	cilia and flagella associated protein 410	ENSMUSG00000020284	0	0	1	0	0	0	0	0	0	chr10	+	77978640	77978781	0	0
Cfap410	e2.0	1114	1132	1.03364	0.723198	chr10:77978640-77986905	cilia and flagella associated protein 410	ENSMUSG00000020284	0	0	1	0	0	0	0	0	0	chr10	+	77979753	77979771	1	1
Ilvbl	e1.0	1	166	-1.2687	0.0549532	chr10:78574500-78584508	ilvB (bacterial acetolactate synthase)-like	---	0	0	1	0	0	0	0	0	0	chr10	+	78574500	78574665	0	0
Ilvbl	e2.0	588	732	1.00062	0.995798	chr10:78574500-78584508	ilvB (bacterial acetolactate synthase)-like	---	0	0	1	0	0	0	0	0	0	chr10	+	78575087	78575231	0	0
Ilvbl	e3.0	2083	2284	-1.03202	0.698601	chr10:78574500-78584508	ilvB (bacterial acetolactate synthase)-like	---	0	0	1	0	0	0	0	0	0	chr10	+	78576582	78576783	0	0
Ilvbl	e4.0	2401	2528	-1.04607	0.69096	chr10:78574500-78584508	ilvB (bacterial acetolactate synthase)-like	---	0	0	1	0	0	0	0	0	0	chr10	+	78576900	78577027	0	0
Ilvbl	e5.0	2612	2750	1.00897	0.910764	chr10:78574500-78584508	ilvB (bacterial acetolactate synthase)-like	---	0	0	1	0	0	0	0	0	0	chr10	+	78577111	78577249	0	1
Ilvbl	e6.0	2843	2954	1.11544	0.306745	chr10:78574500-78584508	ilvB (bacterial acetolactate synthase)-like	---	0	0	1	0	0	0	0	0	0	chr10	+	78577342	78577453	0	1
Ilvbl	e7.0	4522	4621	1.04108	0.63034	chr10:78574500-78584508	ilvB (bacterial acetolactate synthase)-like	---	0	0	1	0	0	0	0	0	0	chr10	+	78579021	78579120	0	1
Ilvbl	e8.0	4964	5061	-1.08235	0.431376	chr10:78574500-78584508	ilvB (bacterial acetolactate synthase)-like	---	0	0	1	0	0	0	0	0	0	chr10	+	78579463	78579560	0	1
Ilvbl	e9.0	5167	5303	-1.10612	0.255882	chr10:78574500-78584508	ilvB (bacterial acetolactate synthase)-like	---	0	0	1	0	0	0	0	0	0	chr10	+	78579666	78579802	0	1
Ilvbl	e10.0	6557	6691	1.07228	0.127702	chr10:78574500-78584508	ilvB (bacterial acetolactate synthase)-like	---	0	0	1	0	0	0	0	0	0	chr10	+	78581056	78581190	0	1
Ilvbl	e12.0	8516	8630	1.06402	0.577364	chr10:78574500-78584508	ilvB (bacterial acetolactate synthase)-like	---	1	0	1	0	0	0	0	0	0	chr10	+	78583015	78583129	0	0
Ilvbl	e13.0	8721	8890	-1.04219	0.696608	chr10:78574500-78584508	ilvB (bacterial acetolactate synthase)-like	---	1	0	1	0	0	1	0	0	0	chr10	+	78583220	78583389	0	0
Ilvbl	e14.0	8965	9035	-1.14879	0.312083	chr10:78574500-78584508	ilvB (bacterial acetolactate synthase)-like	---	1	0	1	0	0	0	0	0	0	chr10	+	78583464	78583534	0	0
Ilvbl	e15.0	9131	9202	-1.01024	0.893404	chr10:78574500-78584508	ilvB (bacterial acetolactate synthase)-like	---	1	0	1	0	0	0	0	0	0	chr10	+	78583630	78583701	0	0
Bsg	e1.0	1	227	-1.19167	0.467785	chr10:79704358-79711979	basigin	---	0	0	1	0	0	0	0	0	0	chr10	+	79704358	79704584	0	0
Bsg	e2.0	4340	4687	1.16538	0.151181	chr10:79704358-79711979	basigin	---	0	0	1	0	0	1	0	0	0	chr10	+	79708697	79709044	0	0
Palm	e1.0	1	172	-1.10431	0.510209	chr10:79793569-79820896	paralemmin	---	0	0	1	0	0	0	0	0	0	chr10	+	79793569	79793740	0	0
Palm	e2.0	13072	13123	-1.03112	0.473068	chr10:79793569-79820896	paralemmin	---	0	0	1	0	0	0	0	0	0	chr10	+	79806640	79806691	0	1
Palm	e3.0	13466	13546	-1.0314	0.615681	chr10:79793569-79820896	paralemmin	---	0	0	1	0	0	0	0	0	0	chr10	+	79807034	79807114	0	1
[truncated: 129,227 more rows]

## Sheet: EXON_ANALYSIS_PV
Exons analysis results PV
Gene Symbol	Exon	Gene start	Gene end	FC	P-value	Gene Coordinates	Gene Name	EnsEMBL ID	ALT_POLYA	3PACCEPT	ALT_TSS	COMPLEX	INT_RET	SKIP	5PDONOR	EID	MX	Chromosome	Strand	Start position	End position	Microexon	Constitutive
Lypla1	e1.0	1	160	-1.20431	0.226607	chr1:4807823-4849352	lysophospholipase 1	---	0	0	0	0	0	0	0	0	0	chr1	+	4807823	4807982	0	0
Lypla1	e2.0	633	664	-1.12009	0.180854	chr1:4807823-4849352	lysophospholipase 1	---	0	0	0	0	0	0	0	0	0	chr1	+	4808455	4808486	0	2
Lypla1	e3.0	20762	20827	-1.04779	0.277061	chr1:4807823-4849352	lysophospholipase 1	---	0	0	0	0	0	0	0	0	0	chr1	+	4828584	4828649	0	2
Lypla1	e4.0	22446	22493	1.00187	0.952375	chr1:4807823-4849352	lysophospholipase 1	---	0	0	0	0	0	0	0	0	0	chr1	+	4830268	4830315	0	2
Lypla1	e5.0	24489	24559	-1.00059	0.986044	chr1:4807823-4849352	lysophospholipase 1	---	0	0	0	0	0	0	0	0	0	chr1	+	4832311	4832381	0	2
Lypla1	e6.0	29179	29252	1.04548	0.206395	chr1:4807823-4849352	lysophospholipase 1	---	0	0	0	0	0	0	0	0	0	chr1	+	4837001	4837074	0	2
Lypla1	e7.0	31565	31666	1.00612	0.858682	chr1:4807823-4849352	lysophospholipase 1	---	0	0	0	0	0	1	0	0	0	chr1	+	4839387	4839488	0	2
Lypla1	e8.0	33134	33310	1.01159	0.819613	chr1:4807823-4849352	lysophospholipase 1	---	0	0	0	0	0	0	0	0	0	chr1	+	4840956	4841132	0	2
Lypla1	e9.0	37141	38013	1.03497	0.364624	chr1:4807823-4849352	lysophospholipase 1	---	1	0	0	0	0	0	0	0	0	chr1	+	4844963	4845835	0	1
Tcea1	e1.0	1	283	-1.19293	0.163726	chr1:4857694-4897906	transcription elongation factor A (SII) 1	---	0	0	1	0	0	0	0	0	0	chr1	+	4857694	4857976	0	0
Tcea1	e3.0	9777	9839	-1.02684	0.757369	chr1:4857694-4897906	transcription elongation factor A (SII) 1	---	0	0	0	0	0	0	0	0	0	chr1	+	4867470	4867532	0	2
Tcea1	e4.0	20334	20439	-1.02325	0.70038	chr1:4857694-4897906	transcription elongation factor A (SII) 1	---	0	0	0	0	0	0	0	0	0	chr1	+	4878027	4878132	0	2
Tcea1	e6.0	31768	31909	-1.03985	0.469278	chr1:4857694-4897906	transcription elongation factor A (SII) 1	---	0	0	0	0	0	0	0	0	0	chr1	+	4889461	4889602	0	2
Tcea1	e7.0	33047	33102	1.05164	0.105188	chr1:4857694-4897906	transcription elongation factor A (SII) 1	---	0	0	0	0	0	0	0	0	0	chr1	+	4890740	4890795	0	2
Tcea1	e8.0	34219	34376	-1.01496	0.815518	chr1:4857694-4897906	transcription elongation factor A (SII) 1	---	0	0	0	0	0	0	0	0	0	chr1	+	4891912	4892069	0	2
Tcea1	e9.0	35724	35870	1.0959	0.0278094	chr1:4857694-4897906	transcription elongation factor A (SII) 1	---	0	0	0	0	0	0	0	0	0	chr1	+	4893417	4893563	0	2
Atp6v1h	e1.0	1	193	-1.34744	0.027334	chr1:5083086-5162549	ATPase, H+ transporting, lysosomal V1 subunit H	---	0	0	0	0	0	0	0	0	0	chr1	+	5083086	5083278	0	0
Atp6v1h	e2.0	1332	1478	-1.06942	0.0739359	chr1:5083086-5162549	ATPase, H+ transporting, lysosomal V1 subunit H	---	0	0	0	0	0	0	0	0	0	chr1	+	5084417	5084563	0	2
Atp6v1h	e3.0	5924	6026	-1.01889	0.406302	chr1:5083086-5162549	ATPase, H+ transporting, lysosomal V1 subunit H	---	0	0	0	0	0	0	0	0	0	chr1	+	5089009	5089111	0	2
Atp6v1h	e4.0	10278	10367	1.01541	0.263134	chr1:5083086-5162549	ATPase, H+ transporting, lysosomal V1 subunit H	---	0	0	0	0	0	0	0	0	0	chr1	+	5093363	5093452	0	2
Atp6v1h	e5.0	12530	12643	1.01637	0.261773	chr1:5083086-5162549	ATPase, H+ transporting, lysosomal V1 subunit H	---	0	0	0	0	0	0	0	0	0	chr1	+	5095615	5095728	0	2
Atp6v1h	e6.0	14944	15048	1.04526	0.00180662	chr1:5083086-5162549	ATPase, H+ transporting, lysosomal V1 subunit H	---	0	0	0	0	0	0	0	0	0	chr1	+	5098029	5098133	0	2
Atp6v1h	e7.0	17985	18038	1.28097	0.141253	chr1:5083086-5162549	ATPase, H+ transporting, lysosomal V1 subunit H	---	1	0	0	0	0	1	0	0	0	chr1	+	5101070	5101123	0	0
Atp6v1h	e8.0	34305	34402	1.02123	0.461365	chr1:5083086-5162549	ATPase, H+ transporting, lysosomal V1 subunit H	---	1	0	0	0	0	0	0	0	0	chr1	+	5117390	5117487	0	1
Atp6v1h	e9.0	41192	41384	-1.05142	0.533314	chr1:5083086-5162549	ATPase, H+ transporting, lysosomal V1 subunit H	---	1	0	0	0	0	0	0	0	0	chr1	+	5124277	5124469	0	1
Atp6v1h	e10.0	49999	50177	-1.0418	0.260365	chr1:5083086-5162549	ATPase, H+ transporting, lysosomal V1 subunit H	---	1	0	0	0	0	0	0	0	0	chr1	+	5133084	5133262	0	1
Atp6v1h	e11.0	52727	52852	-1.01096	0.591885	chr1:5083086-5162549	ATPase, H+ transporting, lysosomal V1 subunit H	---	1	0	0	0	0	0	0	0	0	chr1	+	5135812	5135937	0	1
Atp6v1h	e12.0	60665	60766	-1.02799	0.326271	chr1:5083086-5162549	ATPase, H+ transporting, lysosomal V1 subunit H	---	1	0	0	0	0	0	0	0	0	chr1	+	5143750	5143851	0	1
Atp6v1h	e13.0	66863	66976	-1.00321	0.929096	chr1:5083086-5162549	ATPase, H+ transporting, lysosomal V1 subunit H	---	1	0	0	0	0	0	0	0	0	chr1	+	5149948	5150061	0	1
Atp6v1h	e14.0	79020	79464	-1.01147	0.774364	chr1:5083086-5162549	ATPase, H+ transporting, lysosomal V1 subunit H	---	1	0	0	0	0	0	0	0	0	chr1	+	5162105	5162549	0	0
Rb1cc1	e2.0	13281	13390	-1.22735	0.130077	chr1:6214660-6276365	RB1-inducible coiled-coil 1	---	0	0	1	0	0	0	0	0	0	chr1	+	6227940	6228049	0	0
Rb1cc1	e3.0	15300	15414	-1.28123	0.0676169	chr1:6214660-6276365	RB1-inducible coiled-coil 1	---	0	0	1	0	0	0	0	0	0	chr1	+	6229959	6230073	0	0
Rb1cc1	e4.0	19302	19428	1.00624	0.949027	chr1:6214660-6276365	RB1-inducible coiled-coil 1	---	1	0	1	0	0	0	0	0	0	chr1	+	6233961	6234087	0	0
Rb1cc1	e5.0	19570	19740	-1.00488	0.968636	chr1:6214660-6276365	RB1-inducible coiled-coil 1	---	1	0	1	0	0	0	0	0	0	chr1	+	6234229	6234399	0	0
Rb1cc1	e6.0	23603	23805	1.05936	0.606301	chr1:6214660-6276365	RB1-inducible coiled-coil 1	---	1	0	1	0	0	0	0	0	0	chr1	+	6238262	6238464	0	0
Rb1cc1	e7.0	25293	25719	1.135	0.08936	chr1:6214660-6276365	RB1-inducible coiled-coil 1	---	1	0	1	0	0	0	0	0	0	chr1	+	6239952	6240378	0	0
Rb1cc1	e8.0	29446	29616	1.11833	0.11881	chr1:6214660-6276365	RB1-inducible coiled-coil 1	---	1	0	1	0	0	0	0	0	0	chr1	+	6244105	6244275	0	0
Rb1cc1	e9.0	30136	30268	-1.13816	0.147225	chr1:6214660-6276365	RB1-inducible coiled-coil 1	---	0	0	0	0	0	0	0	0	0	chr1	+	6244795	6244927	0	0
Rb1cc1	e9.0	30269	30320	1.00713	0.96667	chr1:6214660-6276365	RB1-inducible coiled-coil 1	---	0	0	0	0	0	0	0	0	0	chr1	+	6244928	6244979	0	0
Rb1cc1	e10.0	30499	30685	1.03092	0.680334	chr1:6214660-6276365	RB1-inducible coiled-coil 1	---	1	0	1	0	0	0	0	0	0	chr1	+	6245158	6245344	0	0
Rb1cc1	e11.0	30766	30847	-1.06546	0.289219	chr1:6214660-6276365	RB1-inducible coiled-coil 1	---	1	0	1	0	0	0	0	0	0	chr1	+	6245425	6245506	0	0
Rb1cc1	e12.0	30939	31000	-1.0356	0.757511	chr1:6214660-6276365	RB1-inducible coiled-coil 1	---	1	0	1	0	0	0	0	0	0	chr1	+	6245598	6245659	0	0
Rb1cc1	e13.0	33047	33150	-1.00606	0.970276	chr1:6214660-6276365	RB1-inducible coiled-coil 1	---	1	0	1	0	0	0	0	0	0	chr1	+	6247706	6247809	0	0
Rb1cc1	e14.0	33407	33533	-1.13025	0.168058	chr1:6214660-6276365	RB1-inducible coiled-coil 1	---	1	0	1	0	0	0	0	0	0	chr1	+	6248066	6248192	0	1
Rb1cc1	e15.0	33617	35508	-1.01027	0.785362	chr1:6214660-6276365	RB1-inducible coiled-coil 1	---	1	0	1	0	0	0	0	0	0	chr1	+	6248276	6250167	0	0
Rb1cc1	e16.0	46271	46436	-1.02161	0.86198	chr1:6214660-6276365	RB1-inducible coiled-coil 1	---	1	0	1	0	0	0	0	0	0	chr1	+	6260930	6261095	0	0
Rb1cc1	e17.0	48175	48283	1.00803	0.925434	chr1:6214660-6276365	RB1-inducible coiled-coil 1	---	1	0	1	0	0	0	0	0	0	chr1	+	6262834	6262942	0	0
Rb1cc1	e18.0	48365	48605	1.01822	0.774136	chr1:6214660-6276365	RB1-inducible coiled-coil 1	---	1	0	1	0	0	0	0	0	0	chr1	+	6263024	6263264	0	0
Rb1cc1	e19.0	49883	49931	1.01635	0.860307	chr1:6214660-6276365	RB1-inducible coiled-coil 1	---	1	0	1	0	0	0	0	0	0	chr1	+	6264542	6264590	0	0
Rb1cc1	e20.0	50915	50962	-1.02057	0.834432	chr1:6214660-6276365	RB1-inducible coiled-coil 1	---	1	0	1	0	0	0	0	0	0	chr1	+	6265574	6265621	0	0
Rb1cc1	e21.0	54039	54097	-1.08229	0.443124	chr1:6214660-6276365	RB1-inducible coiled-coil 1	---	1	0	1	0	0	0	0	0	0	chr1	+	6268698	6268756	0	1
Rb1cc1	e22.0	56032	56158	1.02014	0.763416	chr1:6214660-6276365	RB1-inducible coiled-coil 1	---	0	0	0	0	0	0	0	0	0	chr1	+	6270691	6270817	0	1
Rb1cc1	e22.0	56159	56168	1.15969	0.0171505	chr1:6214660-6276365	RB1-inducible coiled-coil 1	---	0	0	0	0	0	0	0	0	0	chr1	+	6270818	6270827	1	1
Rb1cc1	e23.0	58042	58112	1.19493	0.0226349	chr1:6214660-6276365	RB1-inducible coiled-coil 1	---	1	0	0	0	0	0	0	0	0	chr1	+	6272701	6272771	0	1
Rb1cc1	e24.0	59539	61706	-1.02985	0.579495	chr1:6214660-6276365	RB1-inducible coiled-coil 1	---	1	0	0	0	0	0	0	0	0	chr1	+	6274198	6276365	0	0
Pcmtd1	e1.0	1	297	-1.53375	0.0254269	chr1:7088920-7173631	protein-L-isoaspartate (D-aspartate) O-methyltransferase domain containing 1	ENSMUSG00000051285	0	0	1	0	0	0	0	0	0	chr1	+	7088920	7089216	0	0
Pcmtd1	e2.0	31275	31696	-1.00575	0.714007	chr1:7088920-7173631	protein-L-isoaspartate (D-aspartate) O-methyltransferase domain containing 1	ENSMUSG00000051285	0	0	1	0	0	1	0	0	0	chr1	+	7120194	7120615	0	1
Pcmtd1	e3.0	58718	58820	-1.09117	0.086347	chr1:7088920-7173631	protein-L-isoaspartate (D-aspartate) O-methyltransferase domain containing 1	ENSMUSG00000051285	0	0	1	0	0	1	0	0	0	chr1	+	7147637	7147739	0	1
Pcmtd1	e4.0	71973	72144	-1.0317	0.478995	chr1:7088920-7173631	protein-L-isoaspartate (D-aspartate) O-methyltransferase domain containing 1	ENSMUSG00000051285	0	0	1	0	0	1	0	0	0	chr1	+	7160892	7161063	0	2
Pcmtd1	e5.0	74329	74452	1.02973	0.576588	chr1:7088920-7173631	protein-L-isoaspartate (D-aspartate) O-methyltransferase domain containing 1	ENSMUSG00000051285	0	0	1	0	0	1	0	0	0	chr1	+	7163248	7163371	0	2
Pcmtd1	e6.0	77486	77599	1.37608	0.243918	chr1:7088920-7173631	protein-L-isoaspartate (D-aspartate) O-methyltransferase domain containing 1	ENSMUSG00000051285	0	0	1	0	0	0	0	0	0	chr1	+	7166405	7166518	0	0
Pcmtd1	e7.0	80596	83523	1.00563	0.634186	chr1:7088920-7173631	protein-L-isoaspartate (D-aspartate) O-methyltransferase domain containing 1	ENSMUSG00000051285	0	0	0	0	0	0	0	0	0	chr1	+	7169515	7172442	0	1
Pcmtd1	e8.0	83623	84712	1.02571	0.72513	chr1:7088920-7173631	protein-L-isoaspartate (D-aspartate) O-methyltransferase domain containing 1	ENSMUSG00000051285	0	0	0	0	0	0	0	0	0	chr1	+	7172542	7173631	0	0
Rrs1	e1.0	1	2051	1	0.0981403	chr1:9545407-9547457	ribosome biogenesis regulator 1	ENSMUSG00000061024	0	0	0	0	0	0	0	0	0	chr1	+	9545407	9547457	0	0
Adhfe1	e3.0	1960	1997	1.45484	0.218849	chr1:9547948-9580675	alcohol dehydrogenase, iron containing, 1	ENSMUSG00000025911	0	0	0	0	0	0	0	0	0	chr1	+	9549907	9549944	0	2
Adhfe1	e4.0	3770	3810	1.32945	0.301406	chr1:9547948-9580675	alcohol dehydrogenase, iron containing, 1	ENSMUSG00000025911	0	0	0	0	0	1	0	0	0	chr1	+	9551717	9551757	0	1
Adhfe1	e5.0	4976	5029	1.13446	0.432704	chr1:9547948-9580675	alcohol dehydrogenase, iron containing, 1	ENSMUSG00000025911	0	0	0	0	0	1	0	0	0	chr1	+	9552923	9552976	0	2
Adhfe1	e6.0	5371	5525	-1.54255	0.0621005	chr1:9547948-9580675	alcohol dehydrogenase, iron containing, 1	ENSMUSG00000025911	0	0	0	0	0	0	0	0	0	chr1	+	9553318	9553472	0	2
Adhfe1	e7.0	5676	5872	1.05644	0.352796	chr1:9547948-9580675	alcohol dehydrogenase, iron containing, 1	ENSMUSG00000025911	0	0	0	0	0	0	0	0	0	chr1	+	9553623	9553819	0	2
Adhfe1	e8.0	7591	7668	-1.07943	0.636363	chr1:9547948-9580675	alcohol dehydrogenase, iron containing, 1	ENSMUSG00000025911	0	0	0	0	0	0	0	0	0	chr1	+	9555538	9555615	0	2
Adhfe1	e9.0	9053	9158	1.20425	0.276023	chr1:9547948-9580675	alcohol dehydrogenase, iron containing, 1	ENSMUSG00000025911	0	0	0	0	0	0	0	0	0	chr1	+	9557000	9557105	0	2
Adhfe1	e10.0	10186	10338	1.21826	0.340846	chr1:9547948-9580675	alcohol dehydrogenase, iron containing, 1	ENSMUSG00000025911	0	0	0	0	0	0	0	0	0	chr1	+	9558133	9558285	0	2
Adhfe1	e11.0	12162	12260	-1.08624	0.736835	chr1:9547948-9580675	alcohol dehydrogenase, iron containing, 1	ENSMUSG00000025911	0	0	0	0	0	0	0	0	0	chr1	+	9560109	9560207	0	2
Adhfe1	e12.0	15562	15640	-1.11528	0.729876	chr1:9547948-9580675	alcohol dehydrogenase, iron containing, 1	ENSMUSG00000025911	0	0	0	0	0	0	0	0	0	chr1	+	9563509	9563587	0	2
Adhfe1	e13.0	15850	15946	1.05679	0.777293	chr1:9547948-9580675	alcohol dehydrogenase, iron containing, 1	ENSMUSG00000025911	0	0	0	0	0	0	0	0	0	chr1	+	9563797	9563893	0	2
Adhfe1	e14.0	18834	18991	1.13596	0.293343	chr1:9547948-9580675	alcohol dehydrogenase, iron containing, 1	ENSMUSG00000025911	0	0	0	0	0	0	0	0	0	chr1	+	9566781	9566938	0	2
Adhfe1	e15.0	28244	28522	-1.13505	0.394941	chr1:9547948-9580675	alcohol dehydrogenase, iron containing, 1	ENSMUSG00000025911	0	0	0	0	0	0	0	0	0	chr1	+	9576191	9576469	0	2
Vxn	e1.0	1	385	1.15051	0.149488	chr1:9601266-9627143	vexin	ENSMUSG00000067879	0	0	0	0	0	0	0	0	0	chr1	+	9601266	9601650	0	0
Vxn	e2.0	5709	5764	1.0766	0.451369	chr1:9601266-9627143	vexin	ENSMUSG00000067879	0	0	0	0	0	0	0	0	0	chr1	+	9606974	9607029	0	2
Vxn	e3.0	12047	12209	-1.15174	0.124665	chr1:9601266-9627143	vexin	ENSMUSG00000067879	0	0	0	0	0	0	0	0	0	chr1	+	9613312	9613474	0	2
Vxn	e4.0	18571	18632	1.0095	0.859541	chr1:9601266-9627143	vexin	ENSMUSG00000067879	0	0	0	0	0	0	0	0	0	chr1	+	9619836	9619897	0	2
Vxn	e5.0	21328	21419	1.18028	0.0971671	chr1:9601266-9627143	vexin	ENSMUSG00000067879	0	0	0	0	0	0	0	0	0	chr1	+	9622593	9622684	0	2
Vxn	e6.0	23448	25878	1.07721	0.485065	chr1:9601266-9627143	vexin	ENSMUSG00000067879	0	0	0	0	0	0	0	0	0	chr1	+	9624713	9627143	0	0
Cspp1	e2.0	1787	1893	1.14054	0.719241	chr1:10037987-10136768	centrosome and spindle pole associated protein 1	---	0	0	1	0	0	0	0	0	0	chr1	+	10039773	10039879	0	0
Cspp1	e3.0	7090	7198	1.44222	0.0248061	chr1:10037987-10136768	centrosome and spindle pole associated protein 1	---	1	0	1	0	0	0	0	0	0	chr1	+	10045076	10045184	0	0
Cspp1	e5.0	9438	9540	1.24265	0.000277661	chr1:10037987-10136768	centrosome and spindle pole associated protein 1	---	1	0	1	0	0	0	0	0	0	chr1	+	10047424	10047526	0	1
Cspp1	e6.0	20734	20837	1.26412	0.330152	chr1:10037987-10136768	centrosome and spindle pole associated protein 1	---	1	0	1	0	0	0	0	0	0	chr1	+	10058720	10058823	0	1
Cspp1	e7.0	21838	21861	-1.05386	0.828672	chr1:10037987-10136768	centrosome and spindle pole associated protein 1	---	0	0	1	0	0	1	0	0	0	chr1	+	10059824	10059847	1	0
Cspp1	e8.0	26347	26427	-1.34906	0.17132	chr1:10037987-10136768	centrosome and spindle pole associated protein 1	---	1	0	1	0	0	0	0	0	0	chr1	+	10064333	10064413	0	1
Cspp1	e9.0	27337	27435	-1.16607	0.340413	chr1:10037987-10136768	centrosome and spindle pole associated protein 1	---	1	0	1	0	0	0	0	0	0	chr1	+	10065323	10065421	0	1
Cspp1	e10.0	28440	28834	-1.02644	0.782308	chr1:10037987-10136768	centrosome and spindle pole associated protein 1	---	1	0	1	0	0	0	0	0	0	chr1	+	10066426	10066820	0	1
Cspp1	e11.0	36874	36960	1.23561	0.366021	chr1:10037987-10136768	centrosome and spindle pole associated protein 1	---	1	0	0	0	0	0	0	0	0	chr1	+	10074860	10074946	0	0
Cspp1	e12.0	39186	39256	-1.34848	0.441852	chr1:10037987-10136768	centrosome and spindle pole associated protein 1	---	1	0	0	0	0	0	0	0	0	chr1	+	10077172	10077242	0	0
Cspp1	e13.0	44267	44360	-1.09166	0.611081	chr1:10037987-10136768	centrosome and spindle pole associated protein 1	---	1	0	0	0	0	0	0	0	0	chr1	+	10082253	10082346	0	0
Cspp1	e15.0	47761	47966	-1.05213	0.863534	chr1:10037987-10136768	centrosome and spindle pole associated protein 1	---	1	0	0	0	0	1	0	0	0	chr1	+	10085747	10085952	0	0
Cspp1	e16.0	50065	50198	-1.19738	0.610523	chr1:10037987-10136768	centrosome and spindle pole associated protein 1	---	1	0	0	0	0	0	0	0	0	chr1	+	10088051	10088184	0	0
Cspp1	e17.0	50896	50974	1.59034	0.0739402	chr1:10037987-10136768	centrosome and spindle pole associated protein 1	---	1	0	0	0	0	0	0	0	0	chr1	+	10088882	10088960	0	0
Cspp1	e18.0	52202	52331	1.02978	0.861418	chr1:10037987-10136768	centrosome and spindle pole associated protein 1	---	1	0	0	0	0	0	0	0	0	chr1	+	10090188	10090317	0	0
Cspp1	e19.0	57880	58027	1.31456	0.0378314	chr1:10037987-10136768	centrosome and spindle pole associated protein 1	---	1	0	0	0	0	0	0	0	0	chr1	+	10095866	10096013	0	0
Cspp1	e21.0	70383	70495	1.29883	0.473199	chr1:10037987-10136768	centrosome and spindle pole associated protein 1	---	1	0	0	0	0	0	0	0	0	chr1	+	10108369	10108481	0	0
Cspp1	e22.0	74407	74556	-1.07707	0.887176	chr1:10037987-10136768	centrosome and spindle pole associated protein 1	---	1	0	0	0	0	0	0	0	0	chr1	+	10112393	10112542	0	0
Cspp1	e23.0	74890	75036	1.12686	0.699714	chr1:10037987-10136768	centrosome and spindle pole associated protein 1	---	1	0	0	0	0	0	0	0	0	chr1	+	10112876	10113022	0	0
Cspp1	e24.0	75617	75721	1.29181	0.348381	chr1:10037987-10136768	centrosome and spindle pole associated protein 1	---	1	0	0	0	0	0	0	0	0	chr1	+	10113603	10113707	0	0
Cspp1	e25.0	78032	78098	1.44272	0.0679482	chr1:10037987-10136768	centrosome and spindle pole associated protein 1	---	1	0	0	0	0	0	0	0	0	chr1	+	10116018	10116084	0	0
Cspp1	e26.0	78628	78745	1.23365	0.449235	chr1:10037987-10136768	centrosome and spindle pole associated protein 1	---	1	0	0	0	0	0	0	0	0	chr1	+	10116614	10116731	0	0
Cspp1	e27.0	88354	88493	1.00493	0.984095	chr1:10037987-10136768	centrosome and spindle pole associated protein 1	---	1	0	0	0	0	0	0	0	0	chr1	+	10126340	10126479	0	0
Cspp1	e28.0	89437	89577	1.10519	0.676664	chr1:10037987-10136768	centrosome and spindle pole associated protein 1	---	1	0	0	0	0	0	0	0	0	chr1	+	10127423	10127563	0	0
Cspp1	e29.0	92000	92046	1.03216	0.889196	chr1:10037987-10136768	centrosome and spindle pole associated protein 1	---	1	0	0	0	0	0	0	0	0	chr1	+	10129986	10130032	0	0
Cspp1	e30.0	94468	94531	-2.37906	0.0681733	chr1:10037987-10136768	centrosome and spindle pole associated protein 1	---	1	0	0	0	0	0	0	0	0	chr1	+	10132454	10132517	0	0
Cspp1	e31.0	95178	95287	-1.06851	0.634829	chr1:10037987-10136768	centrosome and spindle pole associated protein 1	---	1	0	0	0	0	0	0	0	0	chr1	+	10133164	10133273	0	0
Cspp1	e32.0	96106	96244	1.10513	0.557263	chr1:10037987-10136768	centrosome and spindle pole associated protein 1	---	1	0	0	0	0	0	0	0	0	chr1	+	10134092	10134230	0	0
Cspp1	e33.0	97948	98782	-1.21857	0.587697	chr1:10037987-10136768	centrosome and spindle pole associated protein 1	---	1	0	0	0	0	0	0	0	0	chr1	+	10135934	10136768	0	0
A830018L16Rik	e1.0	1	523	-1.06077	0.451327	chr1:11414105-11975902	RIKEN cDNA A830018L16 gene	---	0	0	0	0	0	0	0	0	0	chr1	+	11414105	11414627	0	0
A830018L16Rik	e1.0	524	533	-1.01472	0.814012	chr1:11414105-11975902	RIKEN cDNA A830018L16 gene	---	0	0	0	0	0	0	0	0	0	chr1	+	11414628	11414637	1	2
A830018L16Rik	e2.0	97814	97961	1.08413	0.198253	chr1:11414105-11975902	RIKEN cDNA A830018L16 gene	---	0	0	0	0	0	1	0	0	0	chr1	+	11511918	11512065	0	2
A830018L16Rik	e3.0	104474	104605	-1.02443	0.320302	chr1:11414105-11975902	RIKEN cDNA A830018L16 gene	---	0	0	0	0	0	0	0	0	0	chr1	+	11518578	11518709	0	2
A830018L16Rik	e5.0	131050	131178	1.00734	0.878002	chr1:11414105-11975902	RIKEN cDNA A830018L16 gene	---	1	0	0	0	0	0	0	0	0	chr1	+	11545154	11545282	0	2
A830018L16Rik	e6.0	148859	148887	-1.07521	0.234832	chr1:11414105-11975902	RIKEN cDNA A830018L16 gene	---	1	0	0	0	0	0	0	0	0	chr1	+	11562963	11562991	0	2
A830018L16Rik	e7.0	174270	174442	-1.03015	0.339981	chr1:11414105-11975902	RIKEN cDNA A830018L16 gene	---	1	0	0	0	0	0	0	0	0	chr1	+	11588374	11588546	0	2
A830018L16Rik	e8.0	182047	182213	-1.0191	0.654262	chr1:11414105-11975902	RIKEN cDNA A830018L16 gene	---	1	0	0	0	0	0	0	0	0	chr1	+	11596151	11596317	0	2
A830018L16Rik	e9.0	182861	187707	-1.03148	0.69631	chr1:11414105-11975902	RIKEN cDNA A830018L16 gene	---	1	0	0	0	0	0	0	0	0	chr1	+	11596965	11601811	0	0
A830018L16Rik	e10.0	333861	333986	-1.09732	0.390052	chr1:11414105-11975902	RIKEN cDNA A830018L16 gene	---	0	0	0	0	0	0	0	0	0	chr1	+	11747965	11748090	0	0
A830018L16Rik	e10.0	333987	333996	-1.0246	0.890757	chr1:11414105-11975902	RIKEN cDNA A830018L16 gene	---	0	0	0	0	0	0	0	0	0	chr1	+	11748091	11748100	1	0
A830018L16Rik	e11.0	384377	384462	-1.08912	0.542684	chr1:11414105-11975902	RIKEN cDNA A830018L16 gene	---	1	0	0	0	0	0	0	0	0	chr1	+	11798481	11798566	0	1
A830018L16Rik	e12.0	415711	415787	-1.07501	0.484526	chr1:11414105-11975902	RIKEN cDNA A830018L16 gene	---	1	0	0	0	0	0	0	0	0	chr1	+	11829815	11829891	0	1
A830018L16Rik	e13.0	519440	519487	-1.09618	0.28254	chr1:11414105-11975902	RIKEN cDNA A830018L16 gene	---	1	0	0	0	0	1	0	0	0	chr1	+	11933544	11933591	0	0
A830018L16Rik	e14.0	536859	536952	1.112	0.320097	chr1:11414105-11975902	RIKEN cDNA A830018L16 gene	---	1	0	0	0	0	0	0	0	0	chr1	+	11950963	11951056	0	1
A830018L16Rik	e15.0	557942	557998	1.05286	0.740358	chr1:11414105-11975902	RIKEN cDNA A830018L16 gene	---	1	0	0	0	0	0	0	0	0	chr1	+	11972046	11972102	0	1
A830018L16Rik	e16.0	560819	561798	-1.016	0.877893	chr1:11414105-11975902	RIKEN cDNA A830018L16 gene	---	1	0	0	0	0	0	0	0	0	chr1	+	11974923	11975902	0	0
Terf1	e1.0	1	313	-1.2192	0.2202	chr1:15805645-15844052	telomeric repeat binding factor 1	---	0	0	0	0	0	0	0	0	0	chr1	+	15805645	15805957	0	0
Terf1	e2.0	1997	2092	-1.02646	0.886152	chr1:15805645-15844052	telomeric repeat binding factor 1	---	0	0	0	0	0	0	0	0	0	chr1	+	15807641	15807736	0	2
Terf1	e3.0	7397	7518	-1.03752	0.795811	chr1:15805645-15844052	telomeric repeat binding factor 1	---	0	0	0	0	0	0	0	0	0	chr1	+	15813041	15813162	0	2
Terf1	e4.0	10242	10328	-1.00146	0.995909	chr1:15805645-15844052	telomeric repeat binding factor 1	---	0	0	0	0	0	1	0	0	0	chr1	+	15815886	15815972	0	2
Terf1	e5.0	13290	13439	-1.11007	0.639858	chr1:15805645-15844052	telomeric repeat binding factor 1	---	0	0	0	0	0	0	0	0	0	chr1	+	15818934	15819083	0	2
Terf1	e6.0	14007	14119	1.10692	0.417637	chr1:15805645-15844052	telomeric repeat binding factor 1	---	0	0	0	0	0	0	0	0	0	chr1	+	15819651	15819763	0	2
Terf1	e8.0	25863	25922	-1.04267	0.804025	chr1:15805645-15844052	telomeric repeat binding factor 1	---	1	0	0	0	0	0	0	0	0	chr1	+	15831507	15831566	0	2
Terf1	e9.0	27757	27845	-1.1037	0.486288	chr1:15805645-15844052	telomeric repeat binding factor 1	---	1	0	0	0	0	1	0	0	0	chr1	+	15833401	15833489	0	1
Terf1	e10.0	32538	32644	1.01942	0.866803	chr1:15805645-15844052	telomeric repeat binding factor 1	---	1	0	0	0	0	0	0	0	0	chr1	+	15838182	15838288	0	2
Terf1	e11.0	37277	38408	-1.00798	0.966955	chr1:15805645-15844052	telomeric repeat binding factor 1	---	1	0	0	0	0	0	0	0	0	chr1	+	15842921	15844052	0	0
Rdh10	e2.0	2022	2257	1.18299	0.261113	chr1:16105774-16132550	retinol dehydrogenase 10 (all-trans)	ENSMUSG00000025921	0	0	1	0	0	0	0	0	0	chr1	+	16107795	16108030	0	2
Rdh10	e3.0	22392	22490	-1.43741	0.013607	chr1:16105774-16132550	retinol dehydrogenase 10 (all-trans)	ENSMUSG00000025921	0	0	1	0	0	0	0	0	0	chr1	+	16128165	16128263	0	2
Rdh10	e4.0	23423	23568	1.00608	0.951933	chr1:16105774-16132550	retinol dehydrogenase 10 (all-trans)	ENSMUSG00000025921	0	0	1	0	0	0	0	0	0	chr1	+	16129196	16129341	0	2
Rdh10	e5.0	25302	25433	-1.03394	0.83457	chr1:16105774-16132550	retinol dehydrogenase 10 (all-trans)	ENSMUSG00000025921	0	0	0	0	0	0	0	0	0	chr1	+	16131075	16131206	0	2
Rdh10	e6.0	25521	26777	-1.04657	0.551272	chr1:16105774-16132550	retinol dehydrogenase 10 (all-trans)	ENSMUSG00000025921	0	0	0	0	0	0	0	0	0	chr1	+	16131294	16132550	0	0
Tmem70	e1.0	1	315	-1.30291	0.0059996	chr1:16665191-16678275	transmembrane protein 70	---	0	0	0	0	0	0	0	0	0	chr1	+	16665191	16665505	0	0
Tmem70	e2.0	2478	2583	1.00158	0.930945	chr1:16665191-16678275	transmembrane protein 70	---	0	0	0	0	0	0	0	0	0	chr1	+	16667668	16667773	0	2
Tmem70	e3.0	11778	13085	1.01696	0.0185011	chr1:16665191-16678275	transmembrane protein 70	---	0	0	0	0	0	0	0	0	0	chr1	+	16676968	16678275	0	0
Ly96	e1.0	1	188	1.04718	0.892057	chr1:16688432-16709605	lymphocyte antigen 96	---	0	0	0	0	0	0	0	0	0	chr1	+	16688432	16688619	0	0
Ly96	e2.0	3253	3342	-1.10129	0.590396	chr1:16688432-16709605	lymphocyte antigen 96	---	0	0	0	0	0	0	0	0	0	chr1	+	16691684	16691773	0	2
Ly96	e3.0	12364	12418	-1.48495	0.0197929	chr1:16688432-16709605	lymphocyte antigen 96	---	0	0	0	0	0	0	0	0	0	chr1	+	16700795	16700849	0	1
Ly96	e3.0	12419	12492	-1.02851	0.895331	chr1:16688432-16709605	lymphocyte antigen 96	---	0	0	0	0	0	0	0	0	0	chr1	+	16700850	16700923	0	2
Ly96	e4.0	17742	17794	1.05344	0.797783	chr1:16688432-16709605	lymphocyte antigen 96	---	0	0	0	0	0	0	0	0	0	chr1	+	16706173	16706225	0	2
Ly96	e5.0	21008	21174	1.34369	0.24969	chr1:16688432-16709605	lymphocyte antigen 96	---	0	0	0	0	0	0	0	0	0	chr1	+	16709439	16709605	0	1
Gdap1	e1.0	1	227	-1.11528	0.0866168	chr1:17145362-17164268	ganglioside-induced differentiation-associated-protein 1	ENSMUSG00000025777	0	0	1	0	0	0	0	0	0	chr1	+	17145362	17145588	0	0
Gdap1	e2.0	1575	1767	-1.02559	0.376345	chr1:17145362-17164268	ganglioside-induced differentiation-associated-protein 1	ENSMUSG00000025777	0	0	1	0	0	0	0	0	0	chr1	+	17146936	17147128	0	2
Gdap1	e3.0	11600	11773	1.02712	0.532518	chr1:17145362-17164268	ganglioside-induced differentiation-associated-protein 1	ENSMUSG00000025777	0	0	1	0	0	0	0	0	0	chr1	+	17156961	17157134	0	2
Gdap1	e4.0	13048	13142	1.00686	0.908701	chr1:17145362-17164268	ganglioside-induced differentiation-associated-protein 1	ENSMUSG00000025777	0	0	0	0	0	0	0	0	0	chr1	+	17158409	17158503	0	2
Gdap1	e5.0	14563	14677	-1.00473	0.883775	chr1:17145362-17164268	ganglioside-induced differentiation-associated-protein 1	ENSMUSG00000025777	1	0	0	0	0	0	0	0	0	chr1	+	17159924	17160038	0	2
Gdap1	e6.0	15766	18907	1.00338	0.88173	chr1:17145362-17164268	ganglioside-induced differentiation-associated-protein 1	ENSMUSG00000025777	1	0	0	0	0	0	0	0	0	chr1	+	17161127	17164268	0	0
Crispld1	e2.0	371	719	-1.09268	0.726299	chr1:17727045-17766344	cysteine-rich secretory protein LCCL domain containing 1	---	0	0	1	1	0	0	0	0	0	chr1	+	17727415	17727763	0	0
Crispld1	e3.0	1550	1870	1.12823	0.409992	chr1:17727045-17766344	cysteine-rich secretory protein LCCL domain containing 1	---	0	0	1	0	0	0	0	0	0	chr1	+	17728594	17728914	0	2
Crispld1	e4.0	18310	18428	1.02595	0.91701	chr1:17727045-17766344	cysteine-rich secretory protein LCCL domain containing 1	---	0	0	1	0	0	0	0	0	0	chr1	+	17745354	17745472	0	2
Crispld1	e5.0	18736	18868	1.3194	0.082962	chr1:17727045-17766344	cysteine-rich secretory protein LCCL domain containing 1	---	0	0	1	0	0	0	0	0	0	chr1	+	17745780	17745912	0	2
Crispld1	e6.0	19687	19802	-1.20702	0.362487	chr1:17727045-17766344	cysteine-rich secretory protein LCCL domain containing 1	---	0	0	1	0	0	0	0	0	0	chr1	+	17746731	17746846	0	2
Crispld1	e7.0	20457	20557	-1.08148	0.583564	chr1:17727045-17766344	cysteine-rich secretory protein LCCL domain containing 1	---	0	0	1	0	0	0	0	0	0	chr1	+	17747501	17747601	0	2
Crispld1	e8.0	22463	22603	-1.26384	0.149564	chr1:17727045-17766344	cysteine-rich secretory protein LCCL domain containing 1	---	0	0	1	0	0	0	0	0	0	chr1	+	17749507	17749647	0	2
Crispld1	e9.0	23221	23281	-1.25428	0.166172	chr1:17727045-17766344	cysteine-rich secretory protein LCCL domain containing 1	---	0	0	1	0	0	0	0	0	0	chr1	+	17750265	17750325	0	2
Crispld1	e10.0	23390	23456	-1.03272	0.79889	chr1:17727045-17766344	cysteine-rich secretory protein LCCL domain containing 1	---	0	0	1	0	0	0	0	0	0	chr1	+	17750434	17750500	0	2
Crispld1	e11.0	23690	23820	1.05849	0.776075	chr1:17727045-17766344	cysteine-rich secretory protein LCCL domain containing 1	---	0	0	0	0	0	0	0	0	0	chr1	+	17750734	17750864	0	2
Crispld1	e12.0	25794	25837	1.31947	0.154603	chr1:17727045-17766344	cysteine-rich secretory protein LCCL domain containing 1	---	0	0	0	0	0	0	0	0	0	chr1	+	17752838	17752881	0	2
Crispld1	e13.0	25924	25996	1.16908	0.324959	chr1:17727045-17766344	cysteine-rich secretory protein LCCL domain containing 1	---	0	0	0	0	0	0	0	0	0	chr1	+	17752968	17753040	0	2
Crispld1	e14.0	29214	29289	-1.2207	0.277083	chr1:17727045-17766344	cysteine-rich secretory protein LCCL domain containing 1	---	0	0	0	0	0	0	0	0	0	chr1	+	17756258	17756333	0	2
Crispld1	e15.0	35068	35198	1.10328	0.519939	chr1:17727045-17766344	cysteine-rich secretory protein LCCL domain containing 1	---	0	0	0	0	0	0	0	0	0	chr1	+	17762112	17762242	0	2
Paqr8	e1.0	1	139	1.05869	0.702788	chr1:20890548-20939650	progestin and adipoQ receptor family member VIII	---	0	0	1	0	0	0	0	0	0	chr1	+	20890548	20890686	0	0
Paqr8	e4.0	41513	41692	-1.03622	0.737553	chr1:20890548-20939650	progestin and adipoQ receptor family member VIII	---	0	0	0	0	0	0	0	0	0	chr1	+	20932060	20932239	0	1
Paqr8	e5.0	44035	46900	1.02505	0.23145	chr1:20890548-20939650	progestin and adipoQ receptor family member VIII	---	0	0	0	0	0	0	0	0	0	chr1	+	20934582	20937447	0	0
Paqr8	e6.0	47975	49103	-1.14961	0.130576	chr1:20890548-20939650	progestin and adipoQ receptor family member VIII	---	0	0	0	0	0	0	0	0	0	chr1	+	20938522	20939650	0	0
Tmem14a	e1.0	1	315	-1.07807	0.333654	chr1:21218575-21230165	transmembrane protein 14A	---	0	0	0	0	0	0	0	0	0	chr1	+	21218575	21218889	0	0
Tmem14a	e2.0	6984	7069	-1.03549	0.520182	chr1:21218575-21230165	transmembrane protein 14A	---	0	0	0	0	0	0	0	0	0	chr1	+	21225558	21225643	0	2
Tmem14a	e3.0	7371	7472	1.01734	0.683283	chr1:21218575-21230165	transmembrane protein 14A	---	0	0	0	0	0	0	0	0	0	chr1	+	21225945	21226046	0	2
Tmem14a	e4.0	8018	8105	1.03231	0.508455	chr1:21218575-21230165	transmembrane protein 14A	---	0	0	0	0	0	0	0	0	0	chr1	+	21226592	21226679	0	2
Tmem14a	e5.0	11017	11591	-1.00811	0.788273	chr1:21218575-21230165	transmembrane protein 14A	---	0	0	0	0	0	0	0	0	0	chr1	+	21229591	21230165	0	2
Lmbrd1	e1.0	1	608	1.00343	0.978175	chr1:24586581-24766299	LMBR1 domain containing 1	---	0	0	1	0	0	0	0	0	0	chr1	+	24586581	24587188	0	0
Lmbrd1	e2.0	91964	92236	-1.14287	0.0472135	chr1:24586581-24766299	LMBR1 domain containing 1	---	0	0	1	0	0	0	0	0	0	chr1	+	24678544	24678816	0	0
Lmbrd1	e3.0	92338	92454	-1.34525	0.163547	chr1:24586581-24766299	LMBR1 domain containing 1	---	0	0	1	0	0	0	0	0	0	chr1	+	24678918	24679034	0	0
Lmbrd1	e4.0	98817	98993	-1.03511	0.578112	chr1:24586581-24766299	LMBR1 domain containing 1	---	1	0	0	0	0	0	0	0	0	chr1	+	24685397	24685573	0	1
Lmbrd1	e5.0	106361	106421	-1.02561	0.634825	chr1:24586581-24766299	LMBR1 domain containing 1	---	1	0	0	0	0	0	0	0	0	chr1	+	24692941	24693001	0	2
Lmbrd1	e6.0	118241	118338	1.02712	0.496731	chr1:24586581-24766299	LMBR1 domain containing 1	---	1	0	0	0	0	0	0	0	0	chr1	+	24704821	24704918	0	2
Lmbrd1	e7.0	119397	119464	1.07732	0.30551	chr1:24586581-24766299	LMBR1 domain containing 1	---	1	0	0	0	0	0	0	0	0	chr1	+	24705977	24706044	0	2
Lmbrd1	e8.0	124932	125020	1.00025	0.996702	chr1:24586581-24766299	LMBR1 domain containing 1	---	1	0	0	0	0	0	0	0	0	chr1	+	24711512	24711600	0	2
Lmbrd1	e9.0	128329	128402	-1.03448	0.434729	chr1:24586581-24766299	LMBR1 domain containing 1	---	1	0	0	0	0	0	0	0	0	chr1	+	24714909	24714982	0	2
Lmbrd1	e10.0	141966	142091	1.00177	0.96733	chr1:24586581-24766299	LMBR1 domain containing 1	---	1	0	0	0	0	0	0	0	0	chr1	+	24728546	24728671	0	2
Lmbrd1	e11.0	145167	145319	1.00132	0.977822	chr1:24586581-24766299	LMBR1 domain containing 1	---	1	0	0	0	0	0	0	0	0	chr1	+	24731747	24731899	0	2
Lmbrd1	e12.0	157303	157367	-1.05946	0.255361	chr1:24586581-24766299	LMBR1 domain containing 1	---	1	0	0	0	0	0	0	0	0	chr1	+	24743883	24743947	0	2
Lmbrd1	e13.0	157676	157778	-1.16188	0.106204	chr1:24586581-24766299	LMBR1 domain containing 1	---	1	0	0	0	0	0	0	0	0	chr1	+	24744256	24744358	0	2
Lmbrd1	e14.0	158286	158390	-1.00762	0.89831	chr1:24586581-24766299	LMBR1 domain containing 1	---	1	0	0	0	0	0	0	0	0	chr1	+	24744866	24744970	0	2
Lmbrd1	e15.0	160225	160374	1.03513	0.0832971	chr1:24586581-24766299	LMBR1 domain containing 1	---	1	0	0	0	0	0	0	0	0	chr1	+	24746805	24746954	0	2
Lmbrd1	e16.0	162220	162298	1.04633	0.0418112	chr1:24586581-24766299	LMBR1 domain containing 1	---	1	0	0	0	0	0	0	0	0	chr1	+	24748800	24748878	0	2
Lmbrd1	e17.0	175612	175703	1.00165	0.963226	chr1:24586581-24766299	LMBR1 domain containing 1	---	1	0	0	0	0	0	0	0	0	chr1	+	24762192	24762283	0	2
Lmbrd1	e18.0	176043	179719	-1.01161	0.691386	chr1:24586581-24766299	LMBR1 domain containing 1	---	1	0	0	0	0	0	0	0	0	chr1	+	24762623	24766299	0	0
Rab23	e1.0	1	287	-1.07998	0.805417	chr1:33719887-33742564	RAB23, member RAS oncogene family	---	0	0	1	0	0	0	0	0	0	chr1	+	33719887	33720173	0	0
Rab23	e3.0	1722	1813	1.08298	0.51666	chr1:33719887-33742564	RAB23, member RAS oncogene family	---	0	0	1	0	0	0	0	0	0	chr1	+	33721608	33721699	0	1
Rab23	e4.0	3900	4119	1.00807	0.907625	chr1:33719887-33742564	RAB23, member RAS oncogene family	---	0	0	1	0	0	0	0	0	0	chr1	+	33723786	33724005	0	1
Rab23	e5.0	5048	5133	-1.1094	0.257418	chr1:33719887-33742564	RAB23, member RAS oncogene family	---	0	0	1	0	0	0	0	0	0	chr1	+	33724934	33725019	0	2
Rab23	e7.0	14816	14972	-1.00274	0.968331	chr1:33719887-33742564	RAB23, member RAS oncogene family	---	1	0	0	0	0	0	0	0	0	chr1	+	33734702	33734858	0	2
Rab23	e8.0	16914	16996	-1.0211	0.866349	chr1:33719887-33742564	RAB23, member RAS oncogene family	---	1	0	0	0	0	0	0	0	0	chr1	+	33736800	33736882	0	1
Rab23	e9.0	18402	18494	1.07671	0.250638	chr1:33719887-33742564	RAB23, member RAS oncogene family	---	1	0	0	0	0	0	0	0	0	chr1	+	33738288	33738380	0	1
Rab23	e10.0	19367	22678	-1.10894	0.0219278	chr1:33719887-33742564	RAB23, member RAS oncogene family	---	1	0	0	0	0	0	0	0	0	chr1	+	33739253	33742564	0	0
Dst	e1.0	1	228	1.09555	0.596656	chr1:33908225-34308662	dystonin	---	0	0	1	0	0	0	0	0	0	chr1	+	33908225	33908452	0	0
Dst	e2.0	775	809	-1.07682	0.612192	chr1:33908225-34308662	dystonin	---	0	0	1	0	0	0	0	0	0	chr1	+	33908999	33909033	0	0
Dst	e3.0	60479	60679	-1.06424	0.741065	chr1:33908225-34308662	dystonin	---	0	0	1	0	0	0	0	0	0	chr1	+	33968703	33968903	0	0
Dst	e5.0	97967	98174	1.0701	0.631733	chr1:33908225-34308662	dystonin	---	0	0	1	0	0	0	0	0	0	chr1	+	34006191	34006398	0	0
Dst	e7.0	178018	178079	1.06178	0.830595	chr1:33908225-34308662	dystonin	---	0	0	1	0	0	0	0	0	0	chr1	+	34086242	34086303	0	0
Dst	e9.0	205709	205798	1.10915	0.538869	chr1:33908225-34308662	dystonin	---	0	0	1	0	0	0	0	0	0	chr1	+	34113933	34114022	0	0
Dst	e10.0	207894	207971	1.16267	0.41308	chr1:33908225-34308662	dystonin	---	0	0	1	0	0	0	0	0	0	chr1	+	34116118	34116195	0	0
Dst	e11.0	209208	209300	1.31477	0.0676959	chr1:33908225-34308662	dystonin	---	0	0	1	0	0	0	0	0	0	chr1	+	34117432	34117524	0	0
Dst	e13.0	226866	227032	1.13799	0.363903	chr1:33908225-34308662	dystonin	---	1	0	1	0	0	0	0	0	0	chr1	+	34135090	34135256	0	0
Dst	e14.0	243978	244090	1.09133	0.636268	chr1:33908225-34308662	dystonin	---	1	0	1	0	0	0	0	0	0	chr1	+	34152202	34152314	0	0
Dst	e15.0	244189	244295	-1.15728	0.559965	chr1:33908225-34308662	dystonin	---	1	0	1	0	0	0	0	0	0	chr1	+	34152413	34152519	0	0
Dst	e16.0	246289	246408	-1.11179	0.581114	chr1:33908225-34308662	dystonin	---	1	0	1	0	0	0	0	0	0	chr1	+	34154513	34154632	0	0
Dst	e17.0	248375	248470	1.14301	0.208524	chr1:33908225-34308662	dystonin	---	1	0	1	0	0	0	0	0	0	chr1	+	34156599	34156694	0	0
Dst	e18.0	248557	248684	1.2513	0.0953801	chr1:33908225-34308662	dystonin	---	1	0	1	0	0	0	0	0	0	chr1	+	34156781	34156908	0	0
Dst	e20.0	252396	252489	1.10548	0.62068	chr1:33908225-34308662	dystonin	---	1	0	1	0	0	0	0	0	0	chr1	+	34160620	34160713	0	0
Dst	e21.0	252780	252934	1.15136	0.11192	chr1:33908225-34308662	dystonin	---	1	0	1	0	0	0	0	0	0	chr1	+	34161004	34161158	0	0
Dst	e22.0	254785	255247	1.09402	0.488461	chr1:33908225-34308662	dystonin	---	1	0	1	0	0	0	0	0	0	chr1	+	34163009	34163471	0	0
Dst	e24.0	255673	255750	1.79659	0.00264306	chr1:33908225-34308662	dystonin	---	1	0	1	0	0	0	0	0	0	chr1	+	34163897	34163974	0	0
Dst	e25.0	255852	256013	1.33785	0.0964526	chr1:33908225-34308662	dystonin	---	1	0	1	0	0	0	0	0	0	chr1	+	34164076	34164237	0	0
Dst	e26.0	256103	256207	-1.18473	0.213662	chr1:33908225-34308662	dystonin	---	1	0	1	0	0	0	0	0	0	chr1	+	34164327	34164431	0	0
Dst	e27.0	256834	256929	1.0267	0.7976	chr1:33908225-34308662	dystonin	---	1	0	1	0	0	0	0	0	0	chr1	+	34165058	34165153	0	0
Dst	e28.0	257956	258081	1.07698	0.445999	chr1:33908225-34308662	dystonin	---	1	0	1	0	0	0	0	0	0	chr1	+	34166180	34166305	0	0
Dst	e29.0	258718	258867	1.13519	0.107564	chr1:33908225-34308662	dystonin	---	1	0	1	0	0	0	0	0	0	chr1	+	34166942	34167091	0	0
Dst	e30.0	259052	259206	-1.14575	0.481973	chr1:33908225-34308662	dystonin	---	1	0	1	0	0	0	0	0	0	chr1	+	34167276	34167430	0	0
Dst	e31.0	259387	259513	-1.01908	0.915188	chr1:33908225-34308662	dystonin	---	1	0	1	0	0	0	0	0	0	chr1	+	34167611	34167737	0	0
Dst	e32.0	259599	259782	1.14225	0.277611	chr1:33908225-34308662	dystonin	---	1	0	1	0	0	0	0	0	0	chr1	+	34167823	34168006	0	0
Dst	e33.0	260940	261097	1.1128	0.38322	chr1:33908225-34308662	dystonin	---	1	0	1	0	0	0	0	0	0	chr1	+	34169164	34169321	0	0
Dst	e34.0	261526	261704	1.07356	0.783544	chr1:33908225-34308662	dystonin	---	1	0	1	0	0	0	0	0	0	chr1	+	34169750	34169928	0	0
Dst	e35.0	262136	262274	1.19268	0.433739	chr1:33908225-34308662	dystonin	---	1	0	1	0	0	0	0	0	0	chr1	+	34170360	34170498	0	0
Dst	e36.0	262892	263085	-1.06598	0.534879	chr1:33908225-34308662	dystonin	---	1	0	1	0	0	0	0	0	0	chr1	+	34171116	34171309	0	0
Dst	e37.0	263959	264121	-1.00157	0.992632	chr1:33908225-34308662	dystonin	---	1	0	1	0	0	0	0	0	0	chr1	+	34172183	34172345	0	0
Dst	e38.0	264778	264861	-1.10868	0.277038	chr1:33908225-34308662	dystonin	---	1	0	1	0	0	0	0	0	0	chr1	+	34173002	34173085	0	0
Dst	e39.0	265891	265998	-1.05554	0.71902	chr1:33908225-34308662	dystonin	---	1	0	1	0	0	0	0	0	0	chr1	+	34174115	34174222	0	0
Dst	e40.0	266473	266571	1.16866	0.168599	chr1:33908225-34308662	dystonin	---	1	0	1	0	0	0	0	0	0	chr1	+	34174697	34174795	0	0
Dst	e43.0	275792	275920	1.22647	0.270363	chr1:33908225-34308662	dystonin	---	1	0	1	0	0	0	0	0	0	chr1	+	34184016	34184144	0	0
Dst	e44.0	277738	277826	1.01577	0.932442	chr1:33908225-34308662	dystonin	---	1	0	1	0	0	0	0	0	0	chr1	+	34185962	34186050	0	0
Dst	e45.0	278595	278727	-1.1347	0.382981	chr1:33908225-34308662	dystonin	---	1	0	1	0	0	0	0	0	0	chr1	+	34186819	34186951	0	0
Dst	e51.0	288977	289129	-1.04999	0.743403	chr1:33908225-34308662	dystonin	---	1	0	1	0	0	0	0	0	0	chr1	+	34197201	34197353	0	0
Dst	e52.0	290294	290527	-1.04991	0.726062	chr1:33908225-34308662	dystonin	---	1	0	1	0	0	0	0	0	0	chr1	+	34198518	34198751	0	0
Dst	e53.0	291068	291334	-1.04071	0.675126	chr1:33908225-34308662	dystonin	---	1	0	1	0	0	0	0	0	0	chr1	+	34199292	34199558	0	0
Dst	e54.0	292646	293191	1.02121	0.838627	chr1:33908225-34308662	dystonin	---	1	0	1	0	0	0	0	0	0	chr1	+	34200870	34201415	0	0
Dst	e55.0	294221	294397	-1.11576	0.0943354	chr1:33908225-34308662	dystonin	---	1	0	1	0	0	0	0	0	0	chr1	+	34202445	34202621	0	0
Dst	e56.0	300330	300453	-1.152	0.297291	chr1:33908225-34308662	dystonin	---	1	0	1	0	0	0	0	0	0	chr1	+	34208554	34208677	0	0
Dst	e57.0	302930	303138	1.03517	0.634412	chr1:33908225-34308662	dystonin	---	1	0	1	0	0	0	0	0	0	chr1	+	34211154	34211362	0	0
Dst	e58.0	303998	304315	-1.01415	0.878152	chr1:33908225-34308662	dystonin	---	1	0	1	0	0	0	0	0	0	chr1	+	34212222	34212539	0	0
Dst	e59.0	304678	304844	1.14464	0.0711749	chr1:33908225-34308662	dystonin	---	1	0	1	0	0	0	0	0	0	chr1	+	34212902	34213068	0	0
Dst	e60.0	306310	306466	1.25968	0.0653521	chr1:33908225-34308662	dystonin	---	1	0	1	0	0	0	0	0	0	chr1	+	34214534	34214690	0	0
Dst	e61.0	307262	307388	-1.03697	0.828858	chr1:33908225-34308662	dystonin	---	1	0	1	0	0	0	0	0	0	chr1	+	34215486	34215612	0	0
Dst	e62.0	309586	309648	1.08124	0.645804	chr1:33908225-34308662	dystonin	---	1	0	1	0	0	0	0	0	0	chr1	+	34217810	34217872	0	0
Dst	e63.0	310111	310352	1.0557	0.624703	chr1:33908225-34308662	dystonin	---	1	0	1	0	0	0	0	0	0	chr1	+	34218335	34218576	0	0
Dst	e64.0	311172	311301	-1.02187	0.873978	chr1:33908225-34308662	dystonin	---	1	0	1	0	0	0	0	0	0	chr1	+	34219396	34219525	0	0
Dst	e65.0	315580	315779	1.13347	0.0892369	chr1:33908225-34308662	dystonin	---	1	0	1	0	0	0	0	0	0	chr1	+	34223804	34224003	0	0
Dst	e66.0	317285	317780	1.02462	0.675401	chr1:33908225-34308662	dystonin	---	1	0	1	0	0	0	0	0	0	chr1	+	34225509	34226004	0	0
Dst	e67.0	319551	321022	1.08502	0.0456322	chr1:33908225-34308662	dystonin	---	1	0	1	0	0	0	0	0	0	chr1	+	34227775	34229246	0	0
Dst	e68.0	334395	334556	1.07951	0.468292	chr1:33908225-34308662	dystonin	---	1	0	1	0	0	0	0	0	0	chr1	+	34242619	34242780	0	0
Dst	e69.0	336120	336290	1.07754	0.327508	chr1:33908225-34308662	dystonin	---	1	0	1	0	0	0	0	0	0	chr1	+	34244344	34244514	0	0
Dst	e70.0	339425	339591	1.04955	0.496877	chr1:33908225-34308662	dystonin	---	1	0	1	0	0	0	0	0	0	chr1	+	34247649	34247815	0	0
Dst	e71.0	341255	341414	1.14792	0.0346284	chr1:33908225-34308662	dystonin	---	1	0	1	0	0	0	0	0	0	chr1	+	34249479	34249638	0	0
Dst	e73.0	342386	342470	1.18357	0.056419	chr1:33908225-34308662	dystonin	---	1	0	1	0	0	0	0	0	0	chr1	+	34250610	34250694	0	0
Dst	e74.0	343472	343713	1.18903	0.0366654	chr1:33908225-34308662	dystonin	---	1	0	1	0	0	0	0	0	0	chr1	+	34251696	34251937	0	0
Dst	e75.0	344587	344793	1.07426	0.235668	chr1:33908225-34308662	dystonin	---	1	0	1	0	0	0	0	0	0	chr1	+	34252811	34253017	0	0
Dst	e76.0	348008	348127	1.0869	0.366155	chr1:33908225-34308662	dystonin	---	1	0	1	0	0	0	0	0	0	chr1	+	34256232	34256351	0	0
Dst	e77.0	348318	348425	-1.02069	0.77626	chr1:33908225-34308662	dystonin	---	1	0	1	0	0	0	0	0	0	chr1	+	34256542	34256649	0	0
Dst	e78.0	349498	349716	-1.05884	0.581926	chr1:33908225-34308662	dystonin	---	1	0	1	0	0	0	0	0	0	chr1	+	34257722	34257940	0	0
Dst	e79.0	351940	352143	1.04754	0.644938	chr1:33908225-34308662	dystonin	---	1	0	1	0	0	0	0	0	0	chr1	+	34260164	34260367	0	0
Dst	e80.0	353796	354027	-1.1319	0.125124	chr1:33908225-34308662	dystonin	---	1	0	1	0	0	0	0	0	0	chr1	+	34262020	34262251	0	0
Dst	e81.0	355040	355266	-1.08567	0.419614	chr1:33908225-34308662	dystonin	---	1	0	1	1	0	0	0	0	0	chr1	+	34263264	34263490	0	0
Dst	e82.0	356301	356423	-1.06192	0.45779	chr1:33908225-34308662	dystonin	---	1	0	1	1	0	0	0	0	0	chr1	+	34264525	34264647	0	0
Dst	e83.0	356526	356627	-1.00196	0.984675	chr1:33908225-34308662	dystonin	---	1	0	1	1	0	0	0	0	0	chr1	+	34264750	34264851	0	0
Dst	e84.0	358633	358734	1.00811	0.904226	chr1:33908225-34308662	dystonin	---	1	0	1	1	0	0	0	0	0	chr1	+	34266857	34266958	0	0
Dst	e85.0	360005	360178	1.08403	0.41819	chr1:33908225-34308662	dystonin	---	1	0	1	1	0	0	0	0	0	chr1	+	34268229	34268402	0	0
Dst	e86.0	360511	360666	-1.00941	0.886344	chr1:33908225-34308662	dystonin	---	1	0	1	1	0	0	0	0	0	chr1	+	34268735	34268890	0	0
Dst	e87.0	362604	362801	-1.09699	0.0247254	chr1:33908225-34308662	dystonin	---	1	0	0	1	0	0	0	0	0	chr1	+	34270828	34271025	0	0
Dst	e88.0	363131	363259	-1.01066	0.884466	chr1:33908225-34308662	dystonin	---	1	0	0	1	0	0	0	0	0	chr1	+	34271355	34271483	0	0
Dst	e89.0	365944	366114	-1.13124	0.0132382	chr1:33908225-34308662	dystonin	---	1	0	0	1	0	0	0	0	0	chr1	+	34274168	34274338	0	0
Dst	e90.0	366981	367136	-1.00065	0.979187	chr1:33908225-34308662	dystonin	---	1	0	0	1	0	0	0	0	0	chr1	+	34275205	34275360	0	0
Dst	e91.0	367449	367655	-1.00829	0.882002	chr1:33908225-34308662	dystonin	---	1	0	0	1	0	0	0	0	0	chr1	+	34275673	34275879	0	0
Dst	e92.0	369796	369915	-1.04816	0.315471	chr1:33908225-34308662	dystonin	---	1	0	0	1	0	0	0	0	0	chr1	+	34278020	34278139	0	0
Dst	e93.0	374199	374368	-1.04685	0.393876	chr1:33908225-34308662	dystonin	---	1	0	0	1	0	0	0	0	0	chr1	+	34282423	34282592	0	0
Dst	e94.0	376035	376194	-1.11988	0.183173	chr1:33908225-34308662	dystonin	---	1	0	0	1	0	0	0	0	0	chr1	+	34284259	34284418	0	0
Dst	e95.0	378963	379157	1.13534	0.0541291	chr1:33908225-34308662	dystonin	---	1	0	0	1	0	0	0	0	0	chr1	+	34287187	34287381	0	0
Dst	e96.0	379667	379795	1.03445	0.71171	chr1:33908225-34308662	dystonin	---	1	0	0	1	0	0	0	0	0	chr1	+	34287891	34288019	0	0
Dst	e97.0	381300	381443	-1.09729	0.0980027	chr1:33908225-34308662	dystonin	---	1	0	0	1	0	0	0	0	0	chr1	+	34289524	34289667	0	0
Dst	e98.0	382135	382323	-1.05824	0.467711	chr1:33908225-34308662	dystonin	---	1	0	0	1	0	0	0	0	0	chr1	+	34290359	34290547	0	0
Dst	e99.0	383563	383692	-1.03708	0.706914	chr1:33908225-34308662	dystonin	---	1	0	0	1	0	0	0	0	0	chr1	+	34291787	34291916	0	0
Dst	e100.0	385096	385259	1.04099	0.724568	chr1:33908225-34308662	dystonin	---	1	0	0	1	0	0	0	0	0	chr1	+	34293320	34293483	0	0
Dst	e101.0	386160	386322	-1.1233	0.0261455	chr1:33908225-34308662	dystonin	---	1	0	0	1	0	0	0	0	0	chr1	+	34294384	34294546	0	0
Dst	e102.0	386930	387084	-1.10913	0.212372	chr1:33908225-34308662	dystonin	---	1	0	0	1	0	0	0	0	0	chr1	+	34295154	34295308	0	0
Dst	e103.0	387238	387312	-1.00133	0.9908	chr1:33908225-34308662	dystonin	---	1	0	0	1	0	0	0	0	0	chr1	+	34295462	34295536	0	0
Dst	e104.0	388518	388535	-1.04319	0.701191	chr1:33908225-34308662	dystonin	---	1	0	0	1	0	1	0	0	0	chr1	+	34296742	34296759	1	0
Dst	e105.0	391497	391614	1.06603	0.431261	chr1:33908225-34308662	dystonin	---	1	0	0	1	0	0	0	0	0	chr1	+	34299721	34299838	0	0
Dst	e106.0	393637	393708	1.02857	0.778739	chr1:33908225-34308662	dystonin	---	1	0	0	1	0	1	0	0	0	chr1	+	34301861	34301932	0	0
Dst	e107.0	394606	394799	-1.26095	0.0270274	chr1:33908225-34308662	dystonin	---	0	0	0	0	0	0	0	0	0	chr1	+	34302830	34303023	0	0
Dst	e107.0	394800	394808	-1.13242	0.274457	chr1:33908225-34308662	dystonin	---	0	0	0	0	0	0	0	0	0	chr1	+	34303024	34303032	1	0
Dst	e108.0	395197	395307	-1.0164	0.981888	chr1:33908225-34308662	dystonin	---	1	0	0	0	0	1	0	0	0	chr1	+	34303421	34303531	0	0
Dst	e109.0	398304	398427	-1.0704	0.46025	chr1:33908225-34308662	dystonin	---	1	0	0	0	0	0	0	0	0	chr1	+	34306528	34306651	0	0
Dst	e110.0	399106	400438	-1.06886	0.257624	chr1:33908225-34308662	dystonin	---	1	0	0	0	0	0	0	0	0	chr1	+	34307330	34308662	0	0
Imp4	e1.0	1	99	-1.06422	0.760521	chr1:34439829-34445747	IMP4, U3 small nucleolar ribonucleoprotein	ENSMUSG00000026127	0	0	0	0	0	0	0	0	0	chr1	+	34439829	34439927	0	0
Imp4	e2.0	213	321	-1.1912	0.0839572	chr1:34439829-34445747	IMP4, U3 small nucleolar ribonucleoprotein	ENSMUSG00000026127	0	0	0	0	0	0	0	0	0	chr1	+	34440041	34440149	0	2
Imp4	e3.0	3082	3165	-1.14392	0.0877648	chr1:34439829-34445747	IMP4, U3 small nucleolar ribonucleoprotein	ENSMUSG00000026127	1	0	0	0	0	0	0	0	0	chr1	+	34442910	34442993	0	2
Imp4	e4.0	3550	3659	-1.03689	0.766449	chr1:34439829-34445747	IMP4, U3 small nucleolar ribonucleoprotein	ENSMUSG00000026127	1	0	0	0	0	0	0	0	0	chr1	+	34443378	34443487	0	2
Imp4	e5.0	3735	3867	1.08918	0.418609	chr1:34439829-34445747	IMP4, U3 small nucleolar ribonucleoprotein	ENSMUSG00000026127	1	0	0	0	0	0	0	0	0	chr1	+	34443563	34443695	0	2
Imp4	e6.0	3941	4095	1.0947	0.351481	chr1:34439829-34445747	IMP4, U3 small nucleolar ribonucleoprotein	ENSMUSG00000026127	1	0	0	0	0	0	0	0	0	chr1	+	34443769	34443923	0	2
Imp4	e7.0	4169	4263	1.0305	0.748803	chr1:34439829-34445747	IMP4, U3 small nucleolar ribonucleoprotein	ENSMUSG00000026127	1	0	0	0	0	0	0	0	0	chr1	+	34443997	34444091	0	2
Imp4	e8.0	4368	4441	1.03368	0.854763	chr1:34439829-34445747	IMP4, U3 small nucleolar ribonucleoprotein	ENSMUSG00000026127	1	0	0	0	0	0	0	0	0	chr1	+	34444196	34444269	0	2
Imp4	e9.0	4530	5919	1.10197	0.0788009	chr1:34439829-34445747	IMP4, U3 small nucleolar ribonucleoprotein	ENSMUSG00000026127	1	0	0	0	0	0	0	0	0	chr1	+	34444358	34445747	0	0
---	e1.0	1	3523	-1	0.391002	chr1:34445788-34449310	---	---	0	0	0	0	0	0	0	0	0	chr1	+	34445788	34449310	0	1
Amer3	e2.0	6971	11250	1.00028	0.600497	chr1:34579693-34590942	APC membrane recruitment 3	ENSMUSG00000045174	0	0	0	0	0	0	0	0	0	chr1	+	34586663	34590942	0	0
Plekhb2	e1.0	1	105	1.03267	0.435633	chr1:34849959-34879585	pleckstrin homology domain containing, family B (evectins) member 2	---	0	0	0	0	0	0	0	0	0	chr1	+	34849959	34850063	0	0
Plekhb2	e2.0	2267	2378	1.05921	0.720198	chr1:34849959-34879585	pleckstrin homology domain containing, family B (evectins) member 2	---	0	0	0	0	0	1	0	0	0	chr1	+	34852225	34852336	0	0
Plekhb2	e3.0	11915	11959	1.01926	0.498249	chr1:34849959-34879585	pleckstrin homology domain containing, family B (evectins) member 2	---	0	0	0	0	0	0	0	0	0	chr1	+	34861873	34861917	0	1
Plekhb2	e4.0	13048	13200	1.03258	0.0147574	chr1:34849959-34879585	pleckstrin homology domain containing, family B (evectins) member 2	---	0	0	0	0	0	0	0	0	0	chr1	+	34863006	34863158	0	1
Plekhb2	e5.0	13513	13615	1.019	0.353947	chr1:34849959-34879585	pleckstrin homology domain containing, family B (evectins) member 2	---	0	0	0	0	0	0	0	0	0	chr1	+	34863471	34863573	0	1
Plekhb2	e6.0	14515	14554	-1.01875	0.216407	chr1:34849959-34879585	pleckstrin homology domain containing, family B (evectins) member 2	---	0	0	0	0	0	0	0	0	0	chr1	+	34864473	34864512	0	1
Plekhb2	e7.0	16183	16272	-1.04392	0.0121974	chr1:34849959-34879585	pleckstrin homology domain containing, family B (evectins) member 2	---	0	0	0	0	0	0	0	0	0	chr1	+	34866141	34866230	0	1
Plekhb2	e8.0	19342	19447	-1.03381	0.131396	chr1:34849959-34879585	pleckstrin homology domain containing, family B (evectins) member 2	---	0	0	0	0	0	0	0	0	0	chr1	+	34869300	34869405	0	1
Plekhb2	e9.0	26953	27960	-1.01163	0.586838	chr1:34849959-34879585	pleckstrin homology domain containing, family B (evectins) member 2	---	1	0	0	0	0	0	0	0	0	chr1	+	34876911	34877918	0	0
Plekhb2	e10.0	28037	29627	-1.01429	0.690677	chr1:34849959-34879585	pleckstrin homology domain containing, family B (evectins) member 2	---	1	0	0	0	0	0	0	0	0	chr1	+	34877995	34879585	0	0
Hs6st1	e1.0	1	806	-1.31459	0.0056149	chr1:36068379-36107310	heparan sulfate 6-O-sulfotransferase 1	ENSMUSG00000045216	0	0	1	0	0	0	0	0	0	chr1	+	36068379	36069184	0	0
Hs6st1	e2.0	35135	38932	1.01416	0.0102714	chr1:36068379-36107310	heparan sulfate 6-O-sulfotransferase 1	ENSMUSG00000045216	0	0	0	0	0	0	0	0	0	chr1	+	36103513	36107310	0	0
Arid5a	e1.0	1	104	1.27211	0.373876	chr1:36307733-36324029	AT rich interactive domain 5A (MRF1-like)	---	0	0	0	0	0	0	0	0	0	chr1	+	36307733	36307836	0	0
Arid5a	e3.0	8477	8480	-1.01428	0.883145	chr1:36307733-36324029	AT rich interactive domain 5A (MRF1-like)	---	0	0	0	0	0	0	0	0	0	chr1	+	36316209	36316212	1	1
Arid5a	e3.0	8481	8595	1.00162	0.989133	chr1:36307733-36324029	AT rich interactive domain 5A (MRF1-like)	---	0	0	0	0	0	0	0	0	0	chr1	+	36316213	36316327	0	2
Arid5a	e4.0	9472	9592	-1.20492	0.400956	chr1:36307733-36324029	AT rich interactive domain 5A (MRF1-like)	---	1	0	0	1	1	1	0	0	0	chr1	+	36317204	36317324	0	0
Arid5a	e5.0	9878	9930	1.06009	0.632134	chr1:36307733-36324029	AT rich interactive domain 5A (MRF1-like)	---	1	0	0	1	1	1	0	0	0	chr1	+	36317610	36317662	0	1
Arid5a	e6.0	10352	10449	1.10729	0.536401	chr1:36307733-36324029	AT rich interactive domain 5A (MRF1-like)	---	1	0	0	0	0	0	0	0	0	chr1	+	36318084	36318181	0	2
Arid5a	e7.0	10756	10921	-1.0234	0.882837	chr1:36307733-36324029	AT rich interactive domain 5A (MRF1-like)	---	1	0	0	0	0	0	0	0	0	chr1	+	36318488	36318653	0	2
Arid5a	e8.0	11260	16297	-1.00295	0.856107	chr1:36307733-36324029	AT rich interactive domain 5A (MRF1-like)	---	1	0	0	0	0	0	0	0	0	chr1	+	36318992	36324029	0	0
Cnnm4	e1.0	1	1489	1.38181	0.0210158	chr1:36471597-36508778	cyclin M4	ENSMUSG00000037408	0	0	0	0	0	0	0	0	0	chr1	+	36471597	36473085	0	0
Cnnm4	e2.0	26394	26537	1.01338	0.830227	chr1:36471597-36508778	cyclin M4	ENSMUSG00000037408	0	0	0	0	0	0	0	0	0	chr1	+	36497990	36498133	0	1
Cnnm4	e3.0	26799	26933	1.48658	0.0236533	chr1:36471597-36508778	cyclin M4	ENSMUSG00000037408	0	0	0	0	0	0	0	0	0	chr1	+	36498395	36498529	0	1
Cnnm4	e4.0	27815	27984	1.06162	0.52048	chr1:36471597-36508778	cyclin M4	ENSMUSG00000037408	0	0	0	0	0	0	0	0	0	chr1	+	36499411	36499580	0	1
Cnnm4	e5.0	28289	28385	-1.0014	0.991165	chr1:36471597-36508778	cyclin M4	ENSMUSG00000037408	0	0	0	0	0	0	0	0	0	chr1	+	36499885	36499981	0	1
Cnnm4	e6.0	34005	34183	-1.37177	0.0258924	chr1:36471597-36508778	cyclin M4	ENSMUSG00000037408	0	0	0	0	0	0	0	0	0	chr1	+	36505601	36505779	0	1
Cnnm4	e7.0	34813	35019	1.19973	0.431401	chr1:36471597-36508778	cyclin M4	ENSMUSG00000037408	0	0	0	0	0	0	0	0	0	chr1	+	36506409	36506615	0	0
Cnnm4	e8.0	35263	37182	1.35837	0.0081802	chr1:36471597-36508778	cyclin M4	ENSMUSG00000037408	0	0	0	0	0	0	0	0	0	chr1	+	36506859	36508778	0	0
Cnnm3	e1.0	1	1287	-1.01902	0.938406	chr1:36511867-36528237	cyclin M3	---	0	0	0	0	0	0	0	0	0	chr1	+	36511867	36513153	0	0
Cnnm3	e2.0	7086	7229	1.27021	0.0714532	chr1:36511867-36528237	cyclin M3	---	0	0	0	0	0	0	0	0	0	chr1	+	36518952	36519095	0	1
Cnnm3	e3.0	8212	8215	-1.05693	0.651172	chr1:36511867-36528237	cyclin M3	---	0	0	0	0	0	0	0	0	0	chr1	+	36520078	36520081	1	1
Cnnm3	e3.0	8216	8361	-1.09128	0.550132	chr1:36511867-36528237	cyclin M3	---	0	0	0	0	0	0	0	0	0	chr1	+	36520082	36520227	0	1
Cnnm3	e4.0	8653	8822	-1.15145	0.254558	chr1:36511867-36528237	cyclin M3	---	0	0	0	0	0	1	0	0	0	chr1	+	36520519	36520688	0	1
Cnnm3	e5.0	8953	9049	-1.15248	0.302046	chr1:36511867-36528237	cyclin M3	---	0	0	0	0	0	0	0	0	0	chr1	+	36520819	36520915	0	1
Cnnm3	e6.0	9339	9472	-1.01712	0.861689	chr1:36511867-36528237	cyclin M3	---	0	0	0	0	0	0	0	0	0	chr1	+	36521205	36521338	0	2
Cnnm3	e7.0	9835	9973	1.18183	0.130205	chr1:36511867-36528237	cyclin M3	---	0	0	0	0	0	0	0	0	0	chr1	+	36521701	36521839	0	2
Cnnm3	e8.0	12168	12266	-1.13364	0.443082	chr1:36511867-36528237	cyclin M3	---	0	0	0	0	0	1	0	0	0	chr1	+	36524034	36524132	0	0
Cnnm3	e9.0	13300	16371	-1.1767	0.0421353	chr1:36511867-36528237	cyclin M3	---	0	0	0	0	0	0	0	0	0	chr1	+	36525166	36528237	0	0
Cox5b	e1.0	1	203	-1.25224	0.021607	chr1:36691487-36693387	cytochrome c oxidase subunit 5B	ENSMUSG00000061518	0	0	0	0	0	0	0	0	0	chr1	+	36691487	36691689	0	0
Cox5b	e2.0	725	798	-1.04172	0.151672	chr1:36691487-36693387	cytochrome c oxidase subunit 5B	ENSMUSG00000061518	0	0	0	0	0	0	0	0	0	chr1	+	36692211	36692284	0	2
Cox5b	e3.0	965	1064	1.01357	0.130841	chr1:36691487-36693387	cytochrome c oxidase subunit 5B	ENSMUSG00000061518	0	0	0	0	0	0	0	0	0	chr1	+	36692451	36692550	0	2
Cox5b	e4.0	1711	1901	1.03723	0.142844	chr1:36691487-36693387	cytochrome c oxidase subunit 5B	ENSMUSG00000061518	0	0	0	0	0	0	0	0	0	chr1	+	36693197	36693387	0	0
Inpp4a	e1.0	1	281	-1.22026	0.1471	chr1:37299838-37410740	inositol polyphosphate-4-phosphatase, type I	---	0	0	1	0	0	0	0	0	0	chr1	+	37299838	37300118	0	0
Inpp4a	e2.0	57506	57567	1.05967	0.448468	chr1:37299838-37410740	inositol polyphosphate-4-phosphatase, type I	---	0	0	1	0	0	0	0	0	0	chr1	+	37357343	37357404	0	0
Inpp4a	e3.0	57978	58187	-1.08371	0.185123	chr1:37299838-37410740	inositol polyphosphate-4-phosphatase, type I	---	0	0	1	0	0	0	0	0	0	chr1	+	37357815	37358024	0	0
Inpp4a	e4.0	58671	58715	-1.11269	0.175029	chr1:37299838-37410740	inositol polyphosphate-4-phosphatase, type I	---	0	0	1	0	0	0	0	0	0	chr1	+	37358508	37358552	0	0
Inpp4a	e5.0	64273	64391	1.00594	0.892759	chr1:37299838-37410740	inositol polyphosphate-4-phosphatase, type I	---	0	0	1	0	0	0	0	0	0	chr1	+	37364110	37364228	0	0
Inpp4a	e6.0	66326	66442	-1.01755	0.855913	chr1:37299838-37410740	inositol polyphosphate-4-phosphatase, type I	---	0	0	1	0	0	0	0	0	0	chr1	+	37366163	37366279	0	0
Inpp4a	e7.0	66702	66781	-1.05731	0.528729	chr1:37299838-37410740	inositol polyphosphate-4-phosphatase, type I	---	0	0	1	0	0	0	0	0	0	chr1	+	37366539	37366618	0	0
Inpp4a	e8.0	67033	67144	1.00722	0.885848	chr1:37299838-37410740	inositol polyphosphate-4-phosphatase, type I	---	0	0	1	0	0	0	0	0	0	chr1	+	37366870	37366981	0	0
Inpp4a	e9.0	67920	68010	1.10272	0.312496	chr1:37299838-37410740	inositol polyphosphate-4-phosphatase, type I	---	0	0	1	0	0	0	0	0	0	chr1	+	37367757	37367847	0	0
Inpp4a	e10.0	68440	68587	1.07284	0.238307	chr1:37299838-37410740	inositol polyphosphate-4-phosphatase, type I	---	0	0	1	0	0	0	0	0	0	chr1	+	37368277	37368424	0	0
Inpp4a	e11.0	69521	69651	1.01011	0.870364	chr1:37299838-37410740	inositol polyphosphate-4-phosphatase, type I	---	0	0	0	0	0	0	0	0	0	chr1	+	37369358	37369488	0	2
Inpp4a	e12.0	71865	71969	1.08043	0.208097	chr1:37299838-37410740	inositol polyphosphate-4-phosphatase, type I	---	0	0	0	0	0	0	0	0	0	chr1	+	37371702	37371806	0	2
Inpp4a	e13.0	72474	72582	1.11189	0.252309	chr1:37299838-37410740	inositol polyphosphate-4-phosphatase, type I	---	0	0	0	0	0	0	0	0	0	chr1	+	37372311	37372419	0	2
Inpp4a	e14.0	74435	74438	1.14117	0.138248	chr1:37299838-37410740	inositol polyphosphate-4-phosphatase, type I	---	0	0	0	0	0	0	0	0	0	chr1	+	37374272	37374275	1	0
Inpp4a	e14.0	74439	74452	1.14869	0.146474	chr1:37299838-37410740	inositol polyphosphate-4-phosphatase, type I	---	0	0	0	0	0	0	0	0	0	chr1	+	37374276	37374289	1	1
Inpp4a	e15.0	77741	77924	1.0439	0.430731	chr1:37299838-37410740	inositol polyphosphate-4-phosphatase, type I	---	0	0	0	0	0	0	0	0	0	chr1	+	37377578	37377761	0	2
Inpp4a	e16.0	79004	79222	-1.00752	0.855537	chr1:37299838-37410740	inositol polyphosphate-4-phosphatase, type I	---	0	0	0	0	0	0	0	0	0	chr1	+	37378841	37379059	0	2
Inpp4a	e17.0	80085	80223	1.01889	0.754983	chr1:37299838-37410740	inositol polyphosphate-4-phosphatase, type I	---	0	0	0	0	0	0	0	0	0	chr1	+	37379922	37380060	0	2
Inpp4a	e18.0	83502	83534	1.04093	0.463869	chr1:37299838-37410740	inositol polyphosphate-4-phosphatase, type I	---	0	0	0	1	0	1	0	0	0	chr1	+	37383339	37383371	0	1
Inpp4a	e19.0	87861	88033	-1.01962	0.526336	chr1:37299838-37410740	inositol polyphosphate-4-phosphatase, type I	---	0	0	0	0	0	0	0	0	0	chr1	+	37387698	37387870	0	2
Inpp4a	e20.0	88950	89073	-1.07243	0.249036	chr1:37299838-37410740	inositol polyphosphate-4-phosphatase, type I	---	0	0	0	0	0	0	0	0	0	chr1	+	37388787	37388910	0	2
Inpp4a	e21.0	89813	89939	-1.07589	0.421548	chr1:37299838-37410740	inositol polyphosphate-4-phosphatase, type I	---	0	0	0	0	0	0	0	0	0	chr1	+	37389650	37389776	0	2
Inpp4a	e22.0	90212	90352	1.07935	0.0777742	chr1:37299838-37410740	inositol polyphosphate-4-phosphatase, type I	---	0	0	0	0	0	0	0	0	0	chr1	+	37390049	37390189	0	2
Inpp4a	e23.0	93106	93203	1.01275	0.842778	chr1:37299838-37410740	inositol polyphosphate-4-phosphatase, type I	---	0	0	0	0	0	0	0	0	0	chr1	+	37392943	37393040	0	2
Inpp4a	e24.0	96233	96345	-1.08017	0.359802	chr1:37299838-37410740	inositol polyphosphate-4-phosphatase, type I	---	0	0	0	0	0	0	0	0	0	chr1	+	37396070	37396182	0	2
Inpp4a	e25.0	98929	99083	-1.11314	0.163212	chr1:37299838-37410740	inositol polyphosphate-4-phosphatase, type I	---	0	0	0	0	0	0	0	0	0	chr1	+	37398766	37398920	0	2
Inpp4a	e26.0	103612	104605	-1.02547	0.854016	chr1:37299838-37410740	inositol polyphosphate-4-phosphatase, type I	---	1	0	0	0	0	0	0	0	0	chr1	+	37403449	37404442	0	0
Inpp4a	e27.0	108290	110903	-1.00403	0.927276	chr1:37299838-37410740	inositol polyphosphate-4-phosphatase, type I	---	1	0	0	0	0	0	0	0	0	chr1	+	37408127	37410740	0	0
Unc50	e1.0	1	143	-1.35095	0.0286529	chr1:37430139-37439124	unc-50 homolog	---	0	0	0	0	0	0	0	0	0	chr1	+	37430139	37430281	0	0
Unc50	e1.0	144	355	-1.14819	0.37698	chr1:37430139-37439124	unc-50 homolog	---	0	0	0	0	0	0	0	0	0	chr1	+	37430282	37430493	0	1
Unc50	e2.0	1155	1438	1.01483	0.590505	chr1:37430139-37439124	unc-50 homolog	---	0	0	0	0	0	0	0	0	0	chr1	+	37431293	37431576	0	2
Unc50	e3.0	2413	2533	1.02815	0.257435	chr1:37430139-37439124	unc-50 homolog	---	0	0	0	0	0	0	0	0	0	chr1	+	37432551	37432671	0	2
Unc50	e4.0	7024	7163	-1.02907	0.24156	chr1:37430139-37439124	unc-50 homolog	---	0	0	0	0	0	0	0	0	0	chr1	+	37437162	37437301	0	2
Unc50	e5.0	7239	7340	-1.05555	0.501515	chr1:37430139-37439124	unc-50 homolog	---	0	0	0	0	0	0	0	0	0	chr1	+	37437377	37437478	0	2
Unc50	e6.0	8544	8986	1.04552	0.478743	chr1:37430139-37439124	unc-50 homolog	---	0	0	0	0	0	0	0	0	0	chr1	+	37438682	37439124	0	0
Lipt1	e2.0	467	587	1.09033	0.839657	chr1:37871738-37877387	lipoyltransferase 1	ENSMUSG00000037216	0	0	0	0	0	0	0	0	0	chr1	+	37872204	37872324	0	0
Lipt1	e3.0	3127	5650	-1.01526	0.295682	chr1:37871738-37877387	lipoyltransferase 1	ENSMUSG00000037216	0	0	0	0	0	0	0	0	0	chr1	+	37874864	37877387	0	0
Mrpl30	e1.0	1	108	-1.0404	0.543232	chr1:37890477-37898338	mitochondrial ribosomal protein L30	---	0	0	0	0	0	0	0	0	0	chr1	+	37890477	37890584	0	0
Mrpl30	e2.0	2467	2547	-1.01519	0.802212	chr1:37890477-37898338	mitochondrial ribosomal protein L30	---	0	0	0	0	0	1	0	0	0	chr1	+	37892943	37893023	0	1
Mrpl30	e3.0	3463	3539	-1.01533	0.602241	chr1:37890477-37898338	mitochondrial ribosomal protein L30	---	0	0	0	0	0	0	0	0	0	chr1	+	37893939	37894015	0	2
Mrpl30	e4.0	4854	4934	1.0132	0.722892	chr1:37890477-37898338	mitochondrial ribosomal protein L30	---	0	0	0	0	0	0	0	0	0	chr1	+	37895330	37895410	0	2
Mrpl30	e5.0	7212	7358	1.00886	0.669111	chr1:37890477-37898338	mitochondrial ribosomal protein L30	---	0	0	0	0	0	0	0	0	0	chr1	+	37897688	37897834	0	2
Mrpl30	e6.0	7585	7862	-1.06651	0.00335344	chr1:37890477-37898338	mitochondrial ribosomal protein L30	---	0	0	0	0	0	0	0	0	0	chr1	+	37898061	37898338	0	0
Eif5b	e1.0	1	316	-1.34531	0.0390165	chr1:37998009-38055579	eukaryotic translation initiation factor 5B	ENSMUSG00000026083	0	0	0	0	0	0	0	0	0	chr1	+	37998009	37998324	0	0
Eif5b	e2.0	19798	19923	-1.22389	0.0314936	chr1:37998009-38055579	eukaryotic translation initiation factor 5B	ENSMUSG00000026083	0	0	0	0	0	0	0	0	0	chr1	+	38017806	38017931	0	1
Eif5b	e3.0	20017	20101	-1.06015	0.258804	chr1:37998009-38055579	eukaryotic translation initiation factor 5B	ENSMUSG00000026083	0	0	0	0	0	0	0	0	0	chr1	+	38018025	38018109	0	1
Eif5b	e4.0	20857	21526	1.04354	0.030402	chr1:37998009-38055579	eukaryotic translation initiation factor 5B	ENSMUSG00000026083	0	0	0	0	0	0	0	0	0	chr1	+	38018865	38019534	0	1
Eif5b	e5.0	23586	23803	-1.01561	0.751816	chr1:37998009-38055579	eukaryotic translation initiation factor 5B	ENSMUSG00000026083	0	0	0	0	0	0	0	0	0	chr1	+	38021594	38021811	0	0
Eif5b	e6.0	24156	24306	1.0884	0.266295	chr1:37998009-38055579	eukaryotic translation initiation factor 5B	ENSMUSG00000026083	1	0	0	0	0	0	0	0	0	chr1	+	38022164	38022314	0	0
Eif5b	e7.0	34269	34367	1.03956	0.699886	chr1:37998009-38055579	eukaryotic translation initiation factor 5B	ENSMUSG00000026083	1	0	0	0	0	0	0	0	0	chr1	+	38032277	38032375	0	0
Eif5b	e8.0	35060	35149	1.01922	0.693341	chr1:37998009-38055579	eukaryotic translation initiation factor 5B	ENSMUSG00000026083	1	0	0	0	0	0	0	0	0	chr1	+	38033068	38033157	0	0
Eif5b	e9.0	36021	36095	-1.079	0.367851	chr1:37998009-38055579	eukaryotic translation initiation factor 5B	ENSMUSG00000026083	1	0	0	0	0	0	0	0	0	chr1	+	38034029	38034103	0	0
Eif5b	e10.0	37985	38265	1.05916	0.429342	chr1:37998009-38055579	eukaryotic translation initiation factor 5B	ENSMUSG00000026083	1	0	0	0	0	0	0	0	0	chr1	+	38035993	38036273	0	0
Eif5b	e11.0	39195	39302	1.15781	0.103219	chr1:37998009-38055579	eukaryotic translation initiation factor 5B	ENSMUSG00000026083	1	0	0	0	0	0	0	0	0	chr1	+	38037203	38037310	0	0
Eif5b	e12.0	39539	39649	1.0934	0.233751	chr1:37998009-38055579	eukaryotic translation initiation factor 5B	ENSMUSG00000026083	1	0	0	0	0	0	0	0	0	chr1	+	38037547	38037657	0	0
Eif5b	e13.0	42665	42732	-1.00777	0.942351	chr1:37998009-38055579	eukaryotic translation initiation factor 5B	ENSMUSG00000026083	1	0	0	0	0	0	0	0	0	chr1	+	38040673	38040740	0	0
Eif5b	e14.0	43689	43830	-1.02774	0.882848	chr1:37998009-38055579	eukaryotic translation initiation factor 5B	ENSMUSG00000026083	1	0	0	0	0	0	0	0	0	chr1	+	38041697	38041838	0	0
Eif5b	e15.0	46696	46827	-1.06815	0.706917	chr1:37998009-38055579	eukaryotic translation initiation factor 5B	ENSMUSG00000026083	1	0	0	0	0	0	0	0	0	chr1	+	38044704	38044835	0	0
Eif5b	e16.0	47316	47498	-1.03934	0.619972	chr1:37998009-38055579	eukaryotic translation initiation factor 5B	ENSMUSG00000026083	1	0	0	0	0	0	0	0	0	chr1	+	38045324	38045506	0	0
Eif5b	e17.0	47640	47801	1.05831	0.551781	chr1:37998009-38055579	eukaryotic translation initiation factor 5B	ENSMUSG00000026083	1	0	0	0	0	0	0	0	0	chr1	+	38045648	38045809	0	0
Eif5b	e18.0	48604	48735	1.09906	0.110111	chr1:37998009-38055579	eukaryotic translation initiation factor 5B	ENSMUSG00000026083	1	0	0	0	0	0	0	0	0	chr1	+	38046612	38046743	0	0
Eif5b	e19.0	50785	50916	1.06873	0.548646	chr1:37998009-38055579	eukaryotic translation initiation factor 5B	ENSMUSG00000026083	1	0	0	0	0	0	0	0	0	chr1	+	38048793	38048924	0	0
Eif5b	e20.0	51009	51085	-1.0793	0.345873	chr1:37998009-38055579	eukaryotic translation initiation factor 5B	ENSMUSG00000026083	1	0	0	0	0	0	0	0	0	chr1	+	38049017	38049093	0	0
Eif5b	e21.0	51168	51332	-1.01767	0.871821	chr1:37998009-38055579	eukaryotic translation initiation factor 5B	ENSMUSG00000026083	1	0	0	0	0	0	0	0	0	chr1	+	38049176	38049340	0	0
Eif5b	e22.0	52179	52317	1.07772	0.386083	chr1:37998009-38055579	eukaryotic translation initiation factor 5B	ENSMUSG00000026083	1	0	0	0	0	0	0	0	0	chr1	+	38050187	38050325	0	0
Eif5b	e23.0	53115	53276	1.13474	0.0622852	chr1:37998009-38055579	eukaryotic translation initiation factor 5B	ENSMUSG00000026083	1	0	0	0	0	0	0	0	0	chr1	+	38051123	38051284	0	0
Eif5b	e24.0	53598	57571	1.046	0.648951	chr1:37998009-38055579	eukaryotic translation initiation factor 5B	ENSMUSG00000026083	1	0	0	0	0	0	0	0	0	chr1	+	38051606	38055579	0	0
Pdcl3	e1.0	1	78	1.03785	0.650818	chr1:38987772-38997236	phosducin-like 3	ENSMUSG00000026078	0	0	0	0	0	0	0	0	0	chr1	+	38987772	38987849	0	0
Pdcl3	e2.0	3475	3604	1.06242	0.267261	chr1:38987772-38997236	phosducin-like 3	ENSMUSG00000026078	0	0	0	0	0	0	0	0	0	chr1	+	38991246	38991375	0	2
Pdcl3	e3.0	7144	7234	-1.04589	0.388167	chr1:38987772-38997236	phosducin-like 3	ENSMUSG00000026078	0	0	0	0	0	0	0	0	0	chr1	+	38994915	38995005	0	2
Pdcl3	e4.0	7474	7617	-1.06079	0.118636	chr1:38987772-38997236	phosducin-like 3	ENSMUSG00000026078	0	0	0	0	0	0	0	0	0	chr1	+	38995245	38995388	0	2
Pdcl3	e5.0	7964	8172	1.01418	0.698788	chr1:38987772-38997236	phosducin-like 3	ENSMUSG00000026078	0	0	0	0	0	0	0	0	0	chr1	+	38995735	38995943	0	2
Pdcl3	e6.0	8370	9465	1.05003	0.439858	chr1:38987772-38997236	phosducin-like 3	ENSMUSG00000026078	0	0	0	0	0	0	0	0	0	chr1	+	38996141	38997236	0	0
Npas2	e2.0	69116	69172	1.06446	0.759343	chr1:39194204-39363240	neuronal PAS domain protein 2	ENSMUSG00000026077	0	0	0	0	0	0	0	0	0	chr1	+	39263319	39263375	0	2
Npas2	e3.0	93265	93413	1.27384	0.259925	chr1:39194204-39363240	neuronal PAS domain protein 2	ENSMUSG00000026077	0	0	0	0	0	0	0	0	0	chr1	+	39287468	39287616	0	2
Npas2	e4.0	98484	98575	1.06361	0.756743	chr1:39194204-39363240	neuronal PAS domain protein 2	ENSMUSG00000026077	0	0	0	0	0	0	0	0	0	chr1	+	39292687	39292778	0	2
Npas2	e5.0	106441	106530	1.04541	0.841599	chr1:39194204-39363240	neuronal PAS domain protein 2	ENSMUSG00000026077	0	0	0	0	0	0	0	0	0	chr1	+	39300644	39300733	0	2
Npas2	e6.0	117638	117758	-1.05585	0.810555	chr1:39194204-39363240	neuronal PAS domain protein 2	ENSMUSG00000026077	0	0	0	0	0	0	0	0	0	chr1	+	39311841	39311961	0	2
Npas2	e7.0	118752	118865	-1.04424	0.777707	chr1:39194204-39363240	neuronal PAS domain protein 2	ENSMUSG00000026077	0	0	0	0	0	0	0	0	0	chr1	+	39312955	39313068	0	2
Npas2	e8.0	130237	130355	1.03046	0.860696	chr1:39194204-39363240	neuronal PAS domain protein 2	ENSMUSG00000026077	0	0	0	0	0	0	0	0	0	chr1	+	39324440	39324558	0	2
Npas2	e9.0	131093	131175	1.29517	0.135162	chr1:39194204-39363240	neuronal PAS domain protein 2	ENSMUSG00000026077	0	0	0	0	0	0	0	0	0	chr1	+	39325296	39325378	0	2
Npas2	e10.0	131885	131991	1.0016	0.990996	chr1:39194204-39363240	neuronal PAS domain protein 2	ENSMUSG00000026077	0	0	0	0	0	0	0	0	0	chr1	+	39326088	39326194	0	2
Npas2	e11.0	134104	134251	-1.12813	0.257788	chr1:39194204-39363240	neuronal PAS domain protein 2	ENSMUSG00000026077	0	0	0	0	0	0	0	0	0	chr1	+	39328307	39328454	0	2
Npas2	e12.0	136734	136818	-1.09174	0.640641	chr1:39194204-39363240	neuronal PAS domain protein 2	ENSMUSG00000026077	0	0	0	0	0	0	0	0	0	chr1	+	39330937	39331021	0	2
Npas2	e13.0	139607	139748	1.16405	0.364679	chr1:39194204-39363240	neuronal PAS domain protein 2	ENSMUSG00000026077	0	0	0	0	0	0	0	0	0	chr1	+	39333810	39333951	0	2
Npas2	e14.0	140500	140609	-1.06024	0.596716	chr1:39194204-39363240	neuronal PAS domain protein 2	ENSMUSG00000026077	0	0	0	0	0	0	0	0	0	chr1	+	39334703	39334812	0	2
Npas2	e15.0	141792	141893	-1.21882	0.238596	chr1:39194204-39363240	neuronal PAS domain protein 2	ENSMUSG00000026077	0	0	0	0	0	0	0	0	0	chr1	+	39335995	39336096	0	2
Npas2	e16.0	143850	143996	-1.03344	0.847967	chr1:39194204-39363240	neuronal PAS domain protein 2	ENSMUSG00000026077	0	0	0	0	0	0	0	0	0	chr1	+	39338053	39338199	0	2
Npas2	e17.0	151066	151263	-1.01821	0.894179	chr1:39194204-39363240	neuronal PAS domain protein 2	ENSMUSG00000026077	0	0	0	0	0	0	0	0	0	chr1	+	39345269	39345466	0	2
Npas2	e18.0	153288	153478	1.07091	0.556507	chr1:39194204-39363240	neuronal PAS domain protein 2	ENSMUSG00000026077	0	0	0	0	0	0	0	0	0	chr1	+	39347491	39347681	0	2
Npas2	e19.0	154229	154321	-1.06386	0.679735	chr1:39194204-39363240	neuronal PAS domain protein 2	ENSMUSG00000026077	0	0	0	0	0	0	0	0	0	chr1	+	39348432	39348524	0	2
Npas2	e20.0	165446	165620	-1.01217	0.940902	chr1:39194204-39363240	neuronal PAS domain protein 2	ENSMUSG00000026077	0	0	0	0	0	0	0	0	0	chr1	+	39359649	39359823	0	2
Npas2	e21.0	167652	169037	-1.02542	0.615301	chr1:39194204-39363240	neuronal PAS domain protein 2	ENSMUSG00000026077	0	0	0	0	0	0	0	0	0	chr1	+	39361855	39363240	0	0
Rpl31	e5.0	3452	4061	1.05458	0.404686	chr1:39367851-39371911	ribosomal protein L31	---	0	0	0	0	0	0	0	0	0	chr1	+	39371302	39371911	0	0
Cnot11	e2.0	563	1346	-1.33913	0.164193	chr1:39534992-39546875	CCR4-NOT transcription complex, subunit 11	ENSMUSG00000003135	0	0	1	0	0	0	0	0	0	chr1	+	39535554	39536337	0	0
Cnot11	e3.0	2425	2589	-1.03881	0.672049	chr1:39534992-39546875	CCR4-NOT transcription complex, subunit 11	ENSMUSG00000003135	0	0	1	0	0	0	0	0	0	chr1	+	39537416	39537580	0	2
Cnot11	e4.0	3280	3432	1.03232	0.257028	chr1:39534992-39546875	CCR4-NOT transcription complex, subunit 11	ENSMUSG00000003135	0	0	0	0	0	0	0	0	0	chr1	+	39538271	39538423	0	2
Cnot11	e5.0	4882	5084	-1.042	0.168581	chr1:39534992-39546875	CCR4-NOT transcription complex, subunit 11	ENSMUSG00000003135	0	0	0	0	0	0	0	0	0	chr1	+	39539873	39540075	0	2
Cnot11	e6.0	7409	7611	1.03817	0.537586	chr1:39534992-39546875	CCR4-NOT transcription complex, subunit 11	ENSMUSG00000003135	0	0	0	0	0	0	0	0	0	chr1	+	39542400	39542602	0	2
Cnot11	e7.0	9901	9997	1.04468	0.680852	chr1:39534992-39546875	CCR4-NOT transcription complex, subunit 11	ENSMUSG00000003135	0	0	0	0	0	0	0	0	0	chr1	+	39544892	39544988	0	2
Cnot11	e8.0	10078	10410	-1.10808	0.322503	chr1:39534992-39546875	CCR4-NOT transcription complex, subunit 11	ENSMUSG00000003135	0	0	0	0	0	0	0	0	0	chr1	+	39545069	39545401	0	1
Cnot11	e9.0	10933	11884	-1.06407	0.233091	chr1:39534992-39546875	CCR4-NOT transcription complex, subunit 11	ENSMUSG00000003135	0	0	0	0	0	0	0	0	0	chr1	+	39545924	39546875	0	0
Map4k4	e2.0	597	662	1.04739	0.628511	chr1:39900913-40026310	mitogen-activated protein kinase kinase kinase kinase 4	---	0	0	1	0	0	0	0	0	0	chr1	+	39901509	39901574	0	1
Map4k4	e3.0	61266	61322	1.15373	0.378615	chr1:39900913-40026310	mitogen-activated protein kinase kinase kinase kinase 4	---	1	0	1	0	0	0	0	0	0	chr1	+	39962178	39962234	0	1
Map4k4	e4.0	73015	73140	1.05704	0.693571	chr1:39900913-40026310	mitogen-activated protein kinase kinase kinase kinase 4	---	1	0	1	0	0	0	0	0	0	chr1	+	39973927	39974052	0	1
Map4k4	e5.0	75795	75905	-1.06174	0.550795	chr1:39900913-40026310	mitogen-activated protein kinase kinase kinase kinase 4	---	1	0	1	0	0	0	0	0	0	chr1	+	39976707	39976817	0	1
Map4k4	e6.0	79648	79738	-1.28557	0.0607716	chr1:39900913-40026310	mitogen-activated protein kinase kinase kinase kinase 4	---	1	0	1	0	0	0	0	0	0	chr1	+	39980560	39980650	0	1
Map4k4	e7.0	82227	82357	1.25808	0.213317	chr1:39900913-40026310	mitogen-activated protein kinase kinase kinase kinase 4	---	1	0	1	0	0	0	0	0	0	chr1	+	39983139	39983269	0	1
Map4k4	e8.0	82971	83025	1.32315	0.141173	chr1:39900913-40026310	mitogen-activated protein kinase kinase kinase kinase 4	---	1	0	1	0	0	0	0	0	0	chr1	+	39983883	39983937	0	1
Map4k4	e9.0	84270	84348	1.33126	0.0180712	chr1:39900913-40026310	mitogen-activated protein kinase kinase kinase kinase 4	---	1	0	1	0	0	0	0	0	0	chr1	+	39985182	39985260	0	1
Map4k4	e10.0	85713	85888	1.33735	0.244875	chr1:39900913-40026310	mitogen-activated protein kinase kinase kinase kinase 4	---	1	0	1	0	0	0	0	0	0	chr1	+	39986625	39986800	0	1
Map4k4	e11.0	88058	88130	1.04607	0.513724	chr1:39900913-40026310	mitogen-activated protein kinase kinase kinase kinase 4	---	1	0	1	0	0	0	0	0	0	chr1	+	39988970	39989042	0	1
Map4k4	e12.0	89177	89387	-1.0763	0.459378	chr1:39900913-40026310	mitogen-activated protein kinase kinase kinase kinase 4	---	1	0	1	0	0	0	0	0	0	chr1	+	39990089	39990299	0	1
Map4k4	e13.0	96109	96270	-1.15943	0.192708	chr1:39900913-40026310	mitogen-activated protein kinase kinase kinase kinase 4	---	1	0	1	0	0	0	0	0	0	chr1	+	39997021	39997182	0	1
Map4k4	e14.0	98976	99062	-1.18678	0.216935	chr1:39900913-40026310	mitogen-activated protein kinase kinase kinase kinase 4	---	1	0	1	0	0	0	0	0	0	chr1	+	39999888	39999974	0	1
Map4k4	e15.0	99712	99837	-1.31366	0.0418887	chr1:39900913-40026310	mitogen-activated protein kinase kinase kinase kinase 4	---	1	0	1	0	0	0	0	0	0	chr1	+	40000624	40000749	0	1
Map4k4	e16.0	100518	100679	-1.14094	0.292255	chr1:39900913-40026310	mitogen-activated protein kinase kinase kinase kinase 4	---	1	0	1	0	0	1	0	0	1	chr1	+	40001430	40001591	0	0
Map4k4	e17.0	102845	103075	-1.10836	0.282867	chr1:39900913-40026310	mitogen-activated protein kinase kinase kinase kinase 4	---	1	0	1	0	0	1	0	0	1	chr1	+	40003757	40003987	0	0
Map4k4	e18.0	103895	104001	1.16926	0.07864	chr1:39900913-40026310	mitogen-activated protein kinase kinase kinase kinase 4	---	1	0	1	0	0	0	0	0	0	chr1	+	40004807	40004913	0	1
Map4k4	e19.0	105759	105910	-1.05962	0.62946	chr1:39900913-40026310	mitogen-activated protein kinase kinase kinase kinase 4	---	1	0	1	0	0	0	0	0	0	chr1	+	40006671	40006822	0	1
Map4k4	e20.0	106521	106617	-1.17117	0.303063	chr1:39900913-40026310	mitogen-activated protein kinase kinase kinase kinase 4	---	0	0	0	0	0	0	0	0	0	chr1	+	40007433	40007529	0	0
Map4k4	e20.0	106618	106627	-1.1662	0.14194	chr1:39900913-40026310	mitogen-activated protein kinase kinase kinase kinase 4	---	0	0	0	0	0	0	0	0	0	chr1	+	40007530	40007539	1	0
Map4k4	e21.0	108776	108951	1.00517	0.95344	chr1:39900913-40026310	mitogen-activated protein kinase kinase kinase kinase 4	---	1	0	0	0	0	0	0	0	0	chr1	+	40009688	40009863	0	1
Map4k4	e22.0	109645	109765	-1.02007	0.869206	chr1:39900913-40026310	mitogen-activated protein kinase kinase kinase kinase 4	---	1	0	0	0	0	0	0	0	0	chr1	+	40010557	40010677	0	1
Map4k4	e23.0	110738	110929	1.12571	0.406772	chr1:39900913-40026310	mitogen-activated protein kinase kinase kinase kinase 4	---	1	0	0	0	0	1	0	0	0	chr1	+	40011650	40011841	0	0
Map4k4	e24.0	113194	113311	1.02873	0.717251	chr1:39900913-40026310	mitogen-activated protein kinase kinase kinase kinase 4	---	1	0	0	0	0	0	0	0	0	chr1	+	40014106	40014223	0	1
Map4k4	e25.0	113615	113785	-1.04035	0.71152	chr1:39900913-40026310	mitogen-activated protein kinase kinase kinase kinase 4	---	1	0	0	0	0	0	0	0	0	chr1	+	40014527	40014697	0	1
Map4k4	e26.0	116198	116341	-1.10986	0.257167	chr1:39900913-40026310	mitogen-activated protein kinase kinase kinase kinase 4	---	1	0	0	0	0	0	0	0	0	chr1	+	40017110	40017253	0	1
Map4k4	e27.0	118632	118766	1.20775	0.167763	chr1:39900913-40026310	mitogen-activated protein kinase kinase kinase kinase 4	---	1	0	0	0	0	0	0	0	0	chr1	+	40019544	40019678	0	1
Map4k4	e28.0	120172	120272	1.05355	0.623896	chr1:39900913-40026310	mitogen-activated protein kinase kinase kinase kinase 4	---	1	0	0	0	0	0	0	0	0	chr1	+	40021084	40021184	0	1
Map4k4	e29.0	121793	121942	-1.12131	0.163428	chr1:39900913-40026310	mitogen-activated protein kinase kinase kinase kinase 4	---	1	0	0	0	0	0	0	0	0	chr1	+	40022705	40022854	0	1
Map4k4	e30.0	122448	122607	-1.05801	0.512346	chr1:39900913-40026310	mitogen-activated protein kinase kinase kinase kinase 4	---	1	0	0	0	0	0	0	0	0	chr1	+	40023360	40023519	0	1
Map4k4	e31.0	123398	123537	1.01746	0.823245	chr1:39900913-40026310	mitogen-activated protein kinase kinase kinase kinase 4	---	1	0	0	0	0	0	0	0	0	chr1	+	40024310	40024449	0	1
Map4k4	e32.0	123717	124056	-1.16022	0.0944177	chr1:39900913-40026310	mitogen-activated protein kinase kinase kinase kinase 4	---	1	0	0	0	0	0	0	0	0	chr1	+	40024629	40024968	0	0
Map4k4	e33.0	124358	125398	1.04994	0.598952	chr1:39900913-40026310	mitogen-activated protein kinase kinase kinase kinase 4	---	1	0	0	0	0	0	0	0	0	chr1	+	40025270	40026310	0	0
Pou3f3	e1.0	1	374	1.0468	0.848337	chr1:42695768-42700210	POU domain, class 3, transcription factor 3	ENSMUSG00000045515	0	0	1	0	0	0	0	0	0	chr1	+	42695768	42696141	0	0
Pou3f3	e2.0	454	912	-1.00297	0.981172	chr1:42695768-42700210	POU domain, class 3, transcription factor 3	ENSMUSG00000045515	0	0	1	0	0	0	0	0	0	chr1	+	42696221	42696679	0	1
Pou3f3	e4.0	1977	4443	-1.00687	0.792236	chr1:42695768-42700210	POU domain, class 3, transcription factor 3	ENSMUSG00000045515	0	0	0	0	0	0	0	0	0	chr1	+	42697744	42700210	0	0
2900092D14Rik	e1.0	1	2841	1	0.715073	chr1:42700336-42703176	RIKEN cDNA 2900092D14 gene	---	0	0	0	0	0	0	0	0	0	chr1	+	42700336	42703176	0	0
Mrps9	e1.0	1	194	-1.09668	0.16956	chr1:42851233-42905682	mitochondrial ribosomal protein S9	ENSMUSG00000060679	0	0	1	0	0	0	0	0	0	chr1	+	42851233	42851426	0	0
[truncated: 132,492 more rows]

## Sheet: RPKM_exons_PV
Exons expression (RPKM) in PV neurons
[truncated: 149,327 more rows]

## Sheet: RPKM_exons_OB
Exons expression (RPKM) in the olfactory bulb
[truncated: 158,895 more rows]
