# Supplementary material for: Dilated cardiomyopathy-associated RNA Binding Motif Protein 20 regulates long pre-mRNAs in neurons
Source: bioRxiv preprint, doi:10.1101/2023.12.06.570345, version 3 (2025-01-20)
Supplement: Supplementary Table 7 [file 570345_file20.xlsx]

## Sheet: RBM20_Deseq2_Peaks_IntronLength
Gene_Symbol	FC	P_value	P_value_adjusted	Chromosome_Coordinates		Expression_KO	Expression_WT	log2FC	total_length	DEG_regulation	Peaks	total_length_moving_avg	RankDowntoUp	FinalClasification
Rbm20	-23.351	5.35659e-137	1.69022e-132	chr19:53677305-53867080		236.403	5522.94	-4.54612	183183	Downregulated	eCLIP Peak	138736	1	Downregulated with peak
Gm10406	-16.3579	4.9567e-11	9.56641e-08	chr14:6965455-7027449		31.0277	509.474	-4.03738	19380	Downregulated	No eCLIP peak	137856	2	Downregulated without peak
Pla2g4e	-8.23163	2.63935e-06	0.000662974	chr2:120166412-120245335		184.145	1516.14	-3.04149	74447	Downregulated	eCLIP Peak	138969	3	Downregulated with peak
Sst	-7.62464	0.000277732	0.0122405	chr16:23889581-23890845		7.32801	56.9103	-2.9572	665	Non-regulated	No eCLIP peak	138238	4	Non-regulated
Gpx6	-6.47699	0.019127	0.158241	chr13:21312203-21319624		12.2882	79.0977	-2.68636	6160	Non-regulated	No eCLIP peak	138562	5	Non-regulated
Olfr1348	-6.28807	0.0749277	0.354729	chr7:6501242-6502320		14.5682	91.7531	-2.65494	6242	Non-regulated	No eCLIP peak	141957	6	Non-regulated
Eps8l1	-5.70049	0.00378163	0.0591925	chr7:4460697-4480487		90.4658	514.395	-2.50743	15715	Non-regulated	No eCLIP peak	142014	7	Non-regulated
Fmn1	-4.91468	3.52956e-05	0.00332453	chr2:113327736-113716767		471.966	2319.41	-2.297	377215	Downregulated	No eCLIP peak	147757	8	Downregulated without peak
B4galnt3	-4.6953	0.00264185	0.0481576	chr6:120200753-120294897		46.436	218.098	-2.23166	87789	Non-regulated	No eCLIP peak	145694	9	Non-regulated
Tpr	-4.44298	0.000908945	0.0254495	chr1:150392835-150449935		72.1631	320.734	-2.15205	49548	Non-regulated	eCLIP Peak	145983	10	Non-regulated
Dst	-4.37345	3.80169e-06	0.000826354	chr1:33908225-34308662		932.911	4080.54	-2.12895	376167	Downregulated	eCLIP Peak	147080	11	Downregulated with peak
Arc	-4.32988	0.000209565	0.01043	chr15:74669081-74672572		356.681	1544.54	-2.11447	434	Non-regulated	No eCLIP peak	146552	12	Non-regulated
Prrc2c	-4.27005	1.19059e-06	0.000373481	chr1:162670723-162740556		66.4241	284.971	-2.10104	58328	Downregulated	No eCLIP peak	147053	13	Downregulated without peak
Kmt2a	-3.87674	3.55549e-12	1.1219e-08	chr9:44803355-44881289		361.02	1400.28	-1.95557	61481	Downregulated	eCLIP Peak	150320	14	Downregulated with peak
Baz2b	-3.86576	0.000527259	0.0183633	chr2:59899363-60209842		36.1072	140.089	-1.95598	218440	Non-regulated	eCLIP Peak	146816	15	Non-regulated
Macf1	-3.85052	9.0927e-05	0.00639296	chr4:123279223-123684360		856.893	3299.45	-1.94504	311233	Downregulated	eCLIP Peak	150334	16	Downregulated with peak
Zfp605	-3.78429	0.000292611	0.012593	chr5:110110091-110129794		241.611	914.46	-1.92023	16545	Non-regulated	eCLIP Peak	148270	17	Non-regulated
C130074G19Rik	-3.76552	0.00289	0.0508028	chr1:184871922-184883036		71.269	268.653	-1.9144	8258	Non-regulated	No eCLIP peak	149589	18	Non-regulated
Meg3	-3.66854	9.17734e-06	0.00153218	chr12:109540996-109571729		426.892	1566.36	-1.87547	28821	Downregulated	eCLIP Peak	150797	19	Downregulated with peak
Smg1	-3.6471	0.000551674	0.0187986	chr7:118131312-118243637		477.508	1741.69	-1.86689	96773	Non-regulated	No eCLIP peak	157780	20	Non-regulated
St3gal1	-3.62696	0.0266721	0.193683	chr15:67102875-67176883		46.2864	167.935	-1.85925	68224	Non-regulated	No eCLIP peak	157017	21	Non-regulated
Bod1l	-3.56843	0.000129922	0.00780644	chr5:41787538-41844316		416.476	1486.49	-1.83561	46238	Downregulated	eCLIP Peak	156823	22	Downregulated with peak
Wdfy1	-3.55043	0.004262	0.0632635	chr1:79702264-79761770		172.665	613.074	-1.82809	54957	Non-regulated	No eCLIP peak	163766	23	Non-regulated
Pcsk9	-3.5453	0.00243534	0.0455408	chr4:106442334-106464329		37.1781	132.346	-1.83179	18480	Non-regulated	No eCLIP peak	159780	24	Non-regulated
Itprid2	-3.53593	2.59479e-05	0.00291374	chr2:79635424-79672962		108.071	381.719	-1.82053	32447	Downregulated	No eCLIP peak	163505	25	Downregulated without peak
Runx1t1	-3.53387	0.00317018	0.0534819	chr4:13743300-13895056		31.1548	110.704	-1.82918	144431	Non-regulated	eCLIP Peak	159859	26	Non-regulated
Glb1l2	-3.52686	0.0302118	0.207918	chr9:26763044-26806468		39.4444	139.345	-1.82077	39736	Non-regulated	No eCLIP peak	163803	27	Non-regulated
Akap9	-3.48687	2.66659e-08	1.94287e-05	chr5:3928052-4080204		360.98	1259.53	-1.8029	139914	Downregulated	eCLIP Peak	163431	28	Downregulated with peak
Golga4	-3.37906	3.77722e-06	0.000826354	chr9:118506265-118582522		188.289	636.603	-1.75744	68670	Downregulated	No eCLIP peak	163170	29	Downregulated without peak
Pkd1	-3.37637	3.61768e-08	2.42877e-05	chr17:24549834-24596576		391.538	1321.93	-1.75542	32395	Downregulated	eCLIP Peak	165327	30	Downregulated with peak
Aldh3b1	-3.36704	5.20938e-05	0.00433711	chr19:3913493-3929810		38.4904	129.557	-1.75102	14394	Downregulated	No eCLIP peak	165238	31	Downregulated without peak
Cacng2	-3.26408	2.17378e-05	0.00265858	chr15:77991751-78120028		1167.89	3812.5	-1.70684	122771	Downregulated	eCLIP Peak	164370	32	Downregulated with peak
Apc	-3.26298	5.8446e-05	0.0046373	chr18:34220921-34322192		66.6493	218.229	-1.71118	88758	Downregulated	eCLIP Peak	165186	33	Downregulated with peak
Gm3739	-3.22505	6.31443e-07	0.000222502	chr14:7292808-7315245		65.4732	210.62	-1.68567	19391	Downregulated	No eCLIP peak	164384	34	Downregulated without peak
Tmf1	-3.08565	0.0165718	0.14493	chr6:97151950-97179127		128.8	397.387	-1.62541	20394	Non-regulated	No eCLIP peak	164213	35	Non-regulated
Nin	-3.06777	0.0168033	0.146387	chr12:70011435-70112035		145.334	445.836	-1.61714	92364	Non-regulated	No eCLIP peak	164674	36	Non-regulated
Inf2	-3.02185	0.034386	0.224548	chr12:112588767-112615557		176.286	532.86	-1.59583	22173	Non-regulated	eCLIP Peak	165024	37	Non-regulated
Zfp106	-2.98831	0.00357225	0.0573925	chr2:120506820-120563859		466.99	1395.49	-1.5793	47903	Non-regulated	No eCLIP peak	165544	38	Non-regulated
Rps18-ps4	-2.98291	0.459424	0.842143	chr13:97751111-97760965		17.4799	52.1519	-1.57703	8781	Non-regulated	No eCLIP peak	166083	39	Non-regulated
Gabra2	-2.97166	5.39849e-09	5.16194e-06	chr5:70958392-71095850		312.719	930.426	-1.57303	132401	Downregulated	eCLIP Peak	166312	40	Downregulated with peak
Trank1	-2.97086	4.3709e-09	4.44901e-06	chr9:111311738-111395774		164.974	489.741	-1.56978	73517	Downregulated	No eCLIP peak	165081	41	Downregulated without peak
Plekha7	-2.95942	9.5469e-06	0.00157719	chr7:116123485-116308380		95.0407	281.688	-1.56748	179735	Downregulated	No eCLIP peak	165876	42	Downregulated without peak
Cep350	-2.94545	0.00673399	0.0838549	chr1:155844964-155973256		407.673	1200.59	-1.55826	114985	Non-regulated	eCLIP Peak	169414	43	Non-regulated
Gprc5c	-2.91755	0.00361725	0.0577625	chr11:114851532-114872617		28.7313	83.9738	-1.54732	17109	Non-regulated	No eCLIP peak	168390	44	Non-regulated
Nipbl	-2.9063	1.92924e-07	9.51178e-05	chr15:8289824-8453420		320.261	930.906	-1.53939	144424	Downregulated	eCLIP Peak	171387	45	Downregulated with peak
Spen	-2.8767	9.533e-10	1.0743e-06	chr4:141467890-141538597		177.281	510.209	-1.52505	58409	Downregulated	eCLIP Peak	174040	46	Downregulated with peak
Nhlh1	-2.87122	0.114241	0.452541	chr1:172052287-172057597		40.1515	115.435	-1.52355	2818	Non-regulated	No eCLIP peak	173912	47	Non-regulated
Ano2	-2.81708	0.120309	0.465863	chr6:125690417-126040133		157.009	442.442	-1.49465	345783	Non-regulated	No eCLIP peak	175388	48	Non-regulated
Plcb1	-2.80323	0.00675429	0.0839074	chr2:134786163-135475258		588.404	1649.62	-1.48725	681979	Non-regulated	eCLIP Peak	173124	49	Non-regulated
Mycbp2	-2.7869	0.000153541	0.00874516	chr14:103113413-103346814		2938.99	8190.8	-1.47868	218157	Downregulated	eCLIP Peak	170281	50	Downregulated with peak
B230217O12Rik	-2.78669	0.0570178	0.30059	chr19:57323193-57360899		91.5924	255.601	-1.4806	36350	Non-regulated	No eCLIP peak	169562	51	Non-regulated
Tenm3	-2.77745	2.24164e-05	0.0026947	chr8:48225665-48674690		137.765	383.308	-1.4763	438048	Downregulated	eCLIP Peak	176536	52	Downregulated with peak
Rfc1	-2.76174	0.00301999	0.0522152	chr5:65261852-65335642		237.589	656.501	-1.46633	69068	Non-regulated	No eCLIP peak	173126	53	Non-regulated
Nfe2l2	-2.7563	0.148085	0.524497	chr2:75675513-75704666		37.5099	103.528	-1.46467	26654	Non-regulated	No eCLIP peak	172757	54	Non-regulated
Sytl1	-2.74277	0.142569	0.513952	chr4:133253090-133263087		41.5446	114.107	-1.45766	8073	Non-regulated	No eCLIP peak	172644	55	Non-regulated
4930578G10Rik	-2.73205	0.000163795	0.00899585	chr4:42670290-42871806		47.3857	129.502	-1.45045	109838	Downregulated	No eCLIP peak	173454	56	Downregulated without peak
Pclo	-2.72811	5.55096e-10	7.29812e-07	chr5:14514918-14863457		1997.87	5451.07	-1.44807	328458	Downregulated	eCLIP Peak	172545	57	Downregulated with peak
Cep83	-2.71366	0.00157555	0.0352789	chr10:94688653-94790336		55.7645	150.549	-1.43282	98561	Non-regulated	No eCLIP peak	176012	58	Non-regulated
Abhd1	-2.70572	0.00016531	0.00900896	chr5:30950066-30955095		108.931	295.334	-1.43894	3674	Downregulated	No eCLIP peak	175412	59	Downregulated without peak
Ankrd26	-2.70542	0.00188688	0.0394916	chr6:118501300-118562271		35.7719	97.0738	-1.44026	53989	Non-regulated	No eCLIP peak	173440	60	Non-regulated
Plxnd1	-2.69758	0.0671974	0.332343	chr6:115954808-115995007		385.58	1040.26	-1.43185	33288	Non-regulated	No eCLIP peak	175655	61	Non-regulated
Csf1r	-2.69564	1.39677e-06	0.000423784	chr18:61105571-61132149		57.2829	155.4	-1.43981	21597	Downregulated	No eCLIP peak	175361	62	Downregulated without peak
Kalrn	-2.69155	0.199093	0.612387	chr16:33969073-34514049		300.718	809.482	-1.42859	517716	Non-regulated	eCLIP Peak	175394	63	Non-regulated
M5C1000I18Rik	-2.68365	0.0065566	0.0827216	chr9:67758713-67760230		44.1743	117.681	-1.4136	104	Non-regulated	No eCLIP peak	161190	64	Non-regulated
Dscam	-2.68163	5.79002e-06	0.0010747	chr16:96592079-97170735		178.41	479.432	-1.42613	571176	Downregulated	eCLIP Peak	170468	65	Downregulated with peak
Ank2	-2.67396	0.000117902	0.00739621	chr3:126921607-127499260		6883.98	18407.6	-1.41899	536076	Downregulated	eCLIP Peak	165753	66	Downregulated with peak
Ankrd12	-2.66976	5.45717e-11	9.56641e-08	chr17:65967501-66077090		694.552	1854.06	-1.41653	100555	Downregulated	eCLIP Peak	160462	67	Downregulated with peak
Tnrc6c	-2.65474	1.99766e-07	9.69759e-05	chr11:117654289-117763437		225.121	597.386	-1.40796	100425	Downregulated	eCLIP Peak	164567	68	Downregulated with peak
Ank3	-2.64833	3.79896e-08	2.49734e-05	chr10:69533708-70027438		946.786	2508.19	-1.40554	619462	Downregulated	eCLIP Peak	164097	69	Downregulated with peak
Gpatch8	-2.61465	9.10411e-09	8.20774e-06	chr11:102475912-102556158		1258.89	3291.83	-1.38674	73414	Downregulated	No eCLIP peak	158529	70	Downregulated without peak
A330074K22Rik	-2.60486	2.72372e-05	0.00292364	chr8:120204434-120228231		179.207	467.271	-1.38263	21308	Downregulated	No eCLIP peak	162437	71	Downregulated without peak
Sptbn2	-2.6034	8.31818e-13	2.95769e-09	chr19:4711207-4753978		2222.67	5787.24	-1.38058	32895	Downregulated	No eCLIP peak	162530	72	Downregulated without peak
Cyp2d22	-2.60179	0.0013896	0.0331479	chr15:82370528-82380260		40.1823	104.836	-1.3835	6336	Non-regulated	No eCLIP peak	157978	73	Non-regulated
Plce1	-2.58351	0.00644202	0.0818652	chr19:38524197-38785098		28.6089	74.027	-1.37159	293953	Non-regulated	No eCLIP peak	163616	74	Non-regulated
Grin2b	-2.58336	3.17261e-05	0.003168	chr6:135713221-136173545		211.569	547.176	-1.37088	435833	Downregulated	eCLIP Peak	164962	75	Downregulated with peak
Gypc	-2.56545	0.000173259	0.00921927	chr18:32528322-32560034		41.2115	104.796	-1.34647	29533	Downregulated	No eCLIP peak	160968	76	Downregulated without peak
Sptb	-2.54177	2.67383e-05	0.00292364	chr12:76580488-76710548		262.841	668.789	-1.34736	119666	Downregulated	eCLIP Peak	161339	77	Downregulated with peak
Abi3bp	-2.53335	1.01264e-05	0.00163024	chr16:56477843-56690135		203.461	515.642	-1.34162	207896	Downregulated	No eCLIP peak	162046	78	Downregulated without peak
Ddn	-2.52693	0.0430921	0.256678	chr15:98803782-98807926		4178.38	10558.5	-1.33739	404	Non-regulated	No eCLIP peak	160624	79	Non-regulated
Gadl1	-2.52247	0.0809917	0.370378	chr9:115909455-116076176		68.3871	172.629	-1.33588	163070	Non-regulated	No eCLIP peak	161946	80	Non-regulated
Syne1	-2.51124	0.00732071	0.0877722	chr10:5020201-5551483		1364.13	3425.92	-1.32851	501854	Non-regulated	eCLIP Peak	160839	81	Non-regulated
Jakmip2	-2.49209	0.00154469	0.03499	chr18:43531408-43687773		636.202	1585.59	-1.31746	152855	Non-regulated	eCLIP Peak	157622	82	Non-regulated
Zc3h13	-2.49204	2.65492e-07	0.00011799	chr14:75284366-75344427		195.547	488.737	-1.32154	53903	Downregulated	No eCLIP peak	156605	83	Downregulated without peak
Bbx	-2.48883	0.00135468	0.0328054	chr16:50190536-50432466		89.0485	221.896	-1.31722	231804	Non-regulated	eCLIP Peak	159117	84	Non-regulated
D430041D05Rik	-2.48354	3.46065e-05	0.00330901	chr2:104143073-104410611		602.376	1496.56	-1.31291	254926	Downregulated	eCLIP Peak	157501	85	Downregulated with peak
Gramd1c	-2.48021	0.127948	0.482763	chr16:43980350-44042008		149.447	370.834	-1.31114	79252	Non-regulated	No eCLIP peak	155128	86	Non-regulated
Efcc1	-2.47833	0.00166703	0.0363164	chr6:87730869-87755912		153.933	381.893	-1.31087	22287	Non-regulated	No eCLIP peak	154706	87	Non-regulated
Gcc2	-2.47612	8.99442e-05	0.00636345	chr10:58255503-58305598		330.272	817.57	-1.30769	43556	Downregulated	No eCLIP peak	157152	88	Downregulated without peak
Shank2	-2.47312	3.21189e-07	0.000132303	chr7:144175460-144426042		645.161	1595.92	-1.30666	413579	Downregulated	eCLIP Peak	157298	89	Downregulated with peak
Akap5	-2.46878	0.0622045	0.317195	chr12:76324889-76334151		130.962	323.483	-1.30454	2576	Non-regulated	No eCLIP peak	153239	90	Non-regulated
Map7	-2.46258	1.52153e-07	7.74362e-05	chr10:20148471-20281589		121.963	299.365	-1.29546	128800	Downregulated	No eCLIP peak	151789	91	Downregulated without peak
Svil	-2.45906	0.000286933	0.0125226	chr18:4920537-5119293		84.1529	206.822	-1.29731	190845	Non-regulated	eCLIP Peak	153291	92	Non-regulated
Pdzd2	-2.44745	5.47834e-07	0.000200676	chr15:12359711-12739924		1221.6	2990.5	-1.29162	292523	Downregulated	eCLIP Peak	150725	93	Downregulated with peak
Shisal1	-2.44512	0.000875708	0.0250635	chr15:84379203-84482860		150.114	367.507	-1.29171	61978	Non-regulated	eCLIP Peak	150699	94	Non-regulated
Slc24a2	-2.44416	0.000195408	0.0100014	chr4:86983129-87453052		316.337	772.988	-1.28898	236823	Non-regulated	eCLIP Peak	148757	95	Non-regulated
Akap12	-2.441	3.41345e-05	0.00330392	chr10:4266329-4359471		815.17	1990.43	-1.28791	86896	Downregulated	No eCLIP peak	150250	96	Downregulated without peak
Bptf	-2.44094	7.68528e-06	0.00133979	chr11:107033081-107132147		1120.02	2734.5	-1.28776	87198	Downregulated	eCLIP Peak	152264	97	Downregulated with peak
Cemip	-2.4282	0.000397242	0.0152861	chr7:83932857-84086505		84.6141	205.687	-1.28148	146535	Non-regulated	No eCLIP peak	152254	98	Non-regulated
Carmil1	-2.42517	0.00128441	0.0317123	chr13:24012342-24280772		59.3733	144.703	-1.2852	263149	Non-regulated	eCLIP Peak	154673	99	Non-regulated
Celsr3	-2.4097	0.000538632	0.0185343	chr9:108826045-108852969		157.039	378.644	-1.26972	15103	Non-regulated	eCLIP Peak	151597	100	Non-regulated
Nav2	-2.40781	2.7092e-08	1.94287e-05	chr7:48959071-49610087		1345.38	3240.56	-1.26823	639960	Downregulated	eCLIP Peak	153366	101	Downregulated with peak
Amotl1	-2.39579	3.27811e-05	0.00322547	chr9:14541966-14643531		605.395	1450.24	-1.26034	94219	Downregulated	eCLIP Peak	147081	102	Downregulated with peak
Ncor1	-2.39523	0.000676302	0.0213187	chr11:62316426-62457806		4937.02	11825.5	-1.26019	131870	Non-regulated	No eCLIP peak	146889	103	Non-regulated
B930095G15Rik	-2.39177	2.25504e-06	0.000613409	chr14:121246880-121253971		1145.74	2741.63	-1.25876	551	Downregulated	No eCLIP peak	146360	104	Downregulated without peak
Dot1l	-2.38287	0.000188914	0.0098204	chr10:80755203-80795460		392.374	934.929	-1.25263	33448	Downregulated	eCLIP Peak	146783	105	Downregulated with peak
Setbp1	-2.37799	0.00110207	0.0286864	chr18:78750378-79110444		136.1	323.612	-1.2496	349059	Non-regulated	eCLIP Peak	147686	106	Non-regulated
Cacna1c	-2.37254	0.00152922	0.0348244	chr6:118587240-119196410		58.7466	139.189	-1.24446	595830	Non-regulated	eCLIP Peak	150134	107	Non-regulated
Esyt1	-2.36416	0.000921071	0.0256744	chr10:128509965-128525872		31.3399	74.3916	-1.24714	11925	Non-regulated	No eCLIP peak	149834	108	Non-regulated
Myh10	-2.3506	0.00198841	0.0406742	chr11:68691915-68816630		2514.35	5910.61	-1.23312	116927	Non-regulated	No eCLIP peak	144475	109	Non-regulated
Sptbn1	-2.34771	2.13624e-07	0.000100607	chr11:30099396-30268177		9280.05	21786.7	-1.23124	160314	Downregulated	No eCLIP peak	144063	110	Downregulated without peak
Pde7b	-2.34366	0.00895329	0.0993659	chr10:20397053-20725079		105.441	247.476	-1.23085	322938	Non-regulated	eCLIP Peak	142631	111	Non-regulated
Umodl1	-2.3409	0.173011	0.569854	chr17:30954679-31010708		397.968	931.73	-1.22726	50985	Non-regulated	No eCLIP peak	139845	112	Non-regulated
Adgrl2	-2.3403	0.0693604	0.338265	chr3:148815583-148989484		13.4546	31.7553	-1.2389	168848	Non-regulated	No eCLIP peak	145858	113	Non-regulated
Cep250	-2.3403	0.00072504	0.0222989	chr2:155956457-155998900		114.638	268.234	-1.22641	34364	Non-regulated	No eCLIP peak	139585	114	Non-regulated
Fat3	-2.3369	4.07862e-06	0.000865551	chr9:15910189-16502054		2767.6	6467.8	-1.22464	572337	Downregulated	eCLIP Peak	139482	115	Downregulated with peak
Tnrc6a	-2.33492	0.00511252	0.0702341	chr7:123123885-123195288		750.128	1751.4	-1.2233	62933	Non-regulated	No eCLIP peak	135470	116	Non-regulated
Adcy1	-2.3206	0.00117537	0.0298207	chr11:7063433-7178506		76.085	176.628	-1.21503	102759	Non-regulated	No eCLIP peak	135844	117	Non-regulated
Ankrd11	-2.30812	3.2695e-08	2.24273e-05	chr8:122883333-123042284		2308.58	5329.05	-1.20688	149744	Downregulated	eCLIP Peak	145590	118	Downregulated with peak
Tcf20	-2.30561	0.00237005	0.0449426	chr15:82808436-82912134		1688.31	3892.54	-1.20513	130331	Non-regulated	eCLIP Peak	145098	119	Non-regulated
Tenm1	-2.29663	0.00026204	0.0118808	chrX:42532405-43429127		220.115	505.168	-1.19851	734031	Non-regulated	eCLIP Peak	144453	120	Non-regulated
Kmt2d	-2.2919	5.28193e-07	0.000196078	chr15:98831669-98871183		914.036	2096.38	-1.19758	19710	Downregulated	eCLIP Peak	141453	121	Downregulated with peak
Bahcc1	-2.28918	1.52416e-05	0.00208196	chr11:120232946-120292297		284.351	651.95	-1.19709	48624	Downregulated	eCLIP Peak	142035	122	Downregulated with peak
Slc4a4	-2.28652	3.77331e-05	0.00341706	chr5:88886817-89239656		240.1	549.262	-1.19386	344905	Downregulated	eCLIP Peak	142684	123	Downregulated with peak
Capn11	-2.28564	0.358596	0.780894	chr17:45630204-45659309		386.822	884.246	-1.19278	26531	Non-regulated	No eCLIP peak	139400	124	Non-regulated
Rgs6	-2.28442	0.0267234	0.193845	chr12:82616924-83162056		55.0451	125.644	-1.19066	538970	Non-regulated	eCLIP Peak	139906	125	Non-regulated
Mslnl	-2.27955	0.194666	0.605119	chr17:25736040-25748330		237.578	541.662	-1.18899	9663	Non-regulated	No eCLIP peak	137532	126	Non-regulated
Phgdh	-2.27521	8.02789e-06	0.00138038	chr3:98313170-98339969		61.7311	140.662	-1.18816	24928	Downregulated	No eCLIP peak	139587	127	Downregulated without peak
Arhgap21	-2.26273	9.53283e-05	0.00659165	chr2:20847241-20967721		349.462	790.735	-1.17806	113612	Downregulated	No eCLIP peak	141720	128	Downregulated without peak
A430018G15Rik	-2.26154	0.150507	0.529266	chr2:52424995-52434890		19.9081	44.8443	-1.17157	9108	Non-regulated	No eCLIP peak	147312	129	Non-regulated
Akap13	-2.25954	6.13082e-06	0.00111822	chr7:75455534-75754609		2668.91	6031.15	-1.17618	286533	Downregulated	eCLIP Peak	142618	130	Downregulated with peak
Rrbp1	-2.25927	0.00252102	0.0465466	chr2:143947396-144011263		31.5836	72.0407	-1.18963	58692	Non-regulated	eCLIP Peak	135610	131	Non-regulated
Enkur	-2.2539	0.0118009	0.118551	chr2:21180731-21205366		54.0227	122.034	-1.17564	23436	Non-regulated	No eCLIP peak	147347	132	Non-regulated
Aebp1	-2.25285	1.23429e-06	0.00038183	chr11:5861866-5872248		114.739	257.916	-1.16855	6311	Downregulated	No eCLIP peak	152593	133	Downregulated without peak
Hivep1	-2.248	4.85105e-05	0.00414824	chr13:42052021-42192540		125.791	282.549	-1.16748	124253	Downregulated	No eCLIP peak	155664	134	Downregulated without peak
Plch2	-2.22951	3.47782e-06	0.000783575	chr4:154983115-155043155		1369.07	3052.93	-1.157	66935	Downregulated	eCLIP Peak	163223	135	Downregulated with peak
Foxj1	-2.22766	0.00192105	0.0396968	chr11:116330703-116335354		139.06	310.566	-1.1592	2073	Non-regulated	No eCLIP peak	157524	136	Non-regulated
Ccdc88a	-2.22412	0.00656314	0.082738	chr11:29373658-29511522		904.931	2012.54	-1.15314	127775	Non-regulated	No eCLIP peak	163995	137	Non-regulated
Kat6a	-2.22012	2.29743e-05	0.00271509	chr8:22859534-22943259		316.353	702.366	-1.15069	74684	Downregulated	No eCLIP peak	164664	138	Downregulated without peak
Gm28455	-2.2159	0.00241201	0.0453629	chr7:39487361-39500506		88.9097	196.23	-1.14213	8074	Non-regulated	No eCLIP peak	175318	139	Non-regulated
Elavl3	-2.2084	8.81418e-06	0.00148729	chr9:22015005-22052024		9778.21	21594.3	-1.14301	31992	Downregulated	No eCLIP peak	167396	140	Downregulated without peak
Nfatc1	-2.20366	0.0393906	0.24314	chr18:80606205-80713073		40.9987	90.6673	-1.14501	102260	Non-regulated	eCLIP Peak	165600	141	Non-regulated
Cit	-2.19677	7.25314e-06	0.00128641	chr5:115845277-116006343		842.67	1852.51	-1.13644	153790	Downregulated	eCLIP Peak	175912	142	Downregulated with peak
Ryr2	-2.19452	3.34395e-05	0.00324661	chr13:11553103-12106945		705.257	1548.49	-1.13464	537030	Downregulated	eCLIP Peak	175684	143	Downregulated with peak
Sh3rf3	-2.19274	0.000391803	0.0151321	chr10:58813359-59138915		375.825	824.305	-1.13312	319777	Non-regulated	eCLIP Peak	173553	144	Non-regulated
Olfr1347	-2.19237	0.444167	0.831426	chr7:6487913-6488876		26.6058	58.3847	-1.13385	11609	Non-regulated	No eCLIP peak	171766	145	Non-regulated
Wdhd1	-2.18666	0.00872597	0.0979854	chr14:47240945-47276857		14.7267	31.9444	-1.11713	31740	Non-regulated	No eCLIP peak	166658	146	Non-regulated
Fat4	-2.18607	0.00874647	0.0981459	chr3:38886940-39011985		47.3567	102.905	-1.11968	108937	Non-regulated	No eCLIP peak	174726	147	Non-regulated
Sez6l	-2.18082	0.296274	0.730131	chr5:112419151-112577198		155.163	338.444	-1.12513	151971	Non-regulated	eCLIP Peak	178109	148	Non-regulated
Grin2a	-2.18046	0.000860205	0.024788	chr16:9567901-9995813		74.695	163.324	-1.12866	412392	Non-regulated	eCLIP Peak	181546	149	Non-regulated
Ash1l	-2.17821	0.00496483	0.0689525	chr3:88950364-89079373		1952.41	4252.66	-1.12311	117110	Non-regulated	eCLIP Peak	176850	150	Non-regulated
Plec	-2.17498	0.0324427	0.217161	chr15:76170974-76232571		73.9095	161.3	-1.12591	45433	Non-regulated	eCLIP Peak	178310	151	Non-regulated
Myo5b	-2.17334	0.188066	0.595196	chr18:74442605-74771477		231.956	504.222	-1.12021	322212	Non-regulated	No eCLIP peak	177793	152	Non-regulated
Erc2	-2.17269	5.83823e-05	0.0046373	chr14:27622407-28478535		2753.21	5981.79	-1.11947	849875	Downregulated	eCLIP Peak	174608	153	Downregulated with peak
Specc1l	-2.17097	0.000348154	0.0139098	chr10:75212071-75312399		454.356	986.484	-1.11847	93722	Non-regulated	eCLIP Peak	167244	154	Non-regulated
Cnga2	-2.16804	0.189499	0.597396	chrX:71991847-72010217		724.02	1569.8	-1.11648	15306	Non-regulated	No eCLIP peak	166871	155	Non-regulated
Slc38a6	-2.16109	0.0107628	0.111714	chr12:73286848-73354045		39.4234	84.3284	-1.09697	64239	Non-regulated	eCLIP Peak	164444	156	Non-regulated
Angpt1	-2.15866	0.0360065	0.230083	chr15:42424667-42676978		16.9581	36.4572	-1.10423	247995	Non-regulated	No eCLIP peak	166324	157	Non-regulated
Stoml3	-2.158	0.179255	0.580017	chr3:53488707-53508863		1124.24	2426.23	-1.10976	17996	Non-regulated	No eCLIP peak	167515	158	Non-regulated
Atp2b4	-2.15791	1.40494e-05	0.00201506	chr1:133702674-133800755		250.357	541.119	-1.11196	89860	Downregulated	eCLIP Peak	168094	159	Downregulated with peak
Rbfox3	-2.15426	0.261425	0.694663	chr11:118489760-118911597		515.011	1109.53	-1.10727	418890	Non-regulated	eCLIP Peak	170423	160	Non-regulated
Hmgn5	-2.14516	3.21359e-06	0.000752486	chrX:109004534-109013380		58.6742	125.348	-1.09514	6937	Downregulated	No eCLIP peak	166802	161	Downregulated without peak
Coq8a	-2.14144	0.0520112	0.28555	chr1:180165238-180196020		1817.61	3892.31	-1.09859	26757	Non-regulated	No eCLIP peak	164287	162	Non-regulated
Kmt2e	-2.13691	3.07009e-05	0.00310492	chr5:23434440-23504235		1663.8	3555.95	-1.09576	62543	Downregulated	No eCLIP peak	167252	163	Downregulated without peak
Atp1a2	-2.12987	1.14552e-07	6.23204e-05	chr1:172271709-172298064		663.204	1411.88	-1.09009	20129	Downregulated	No eCLIP peak	168128	164	Downregulated without peak
Wscd2	-2.12723	0.300175	0.734271	chr5:113549985-113589725		705.862	1501.57	-1.08902	94977	Non-regulated	eCLIP Peak	170643	165	Non-regulated
Cnga4	-2.12096	0.178808	0.579227	chr7:105404566-105408738		128.415	272.477	-1.08532	1691	Non-regulated	No eCLIP peak	169971	166	Non-regulated
4932438A13Rik	-2.11604	0.000197519	0.0100687	chr3:36863103-37053033		1317.23	2787.26	-1.08134	174045	Non-regulated	No eCLIP peak	174325	167	Non-regulated
Arid1b	-2.11017	3.11352e-05	0.0031204	chr17:4995074-5347656		2478.99	5231.62	-1.07751	341258	Downregulated	eCLIP Peak	172651	168	Downregulated with peak
Ppfia2	-2.10597	0.000109941	0.00715273	chr10:106470310-106933467		3359.38	7074.45	-1.07442	456722	Downregulated	eCLIP Peak	175009	169	Downregulated with peak
Ep300	-2.10524	0.00247866	0.0460068	chr15:81585350-81652077		110.911	233.918	-1.0766	57115	Non-regulated	No eCLIP peak	171210	170	Non-regulated
Togaram2	-2.10428	0.103816	0.430124	chr17:71673261-71729669		46.0061	97.0383	-1.07673	52906	Non-regulated	eCLIP Peak	170409	171	Non-regulated
Tcof1	-2.10358	0.000249427	0.0115741	chr18:60813764-60848964		622.129	1309.62	-1.07386	30688	Non-regulated	No eCLIP peak	173469	172	Non-regulated
Tspoap1	-2.10336	0.000272042	0.012141	chr11:87760540-87785927		135.83	286.219	-1.07532	17772	Non-regulated	eCLIP Peak	173790	173	Non-regulated
Cttnbp2	-2.10072	0.000335417	0.0136564	chr6:18366472-18514869		1143.83	2402.68	-1.07077	142581	Non-regulated	No eCLIP peak	174145	174	Non-regulated
Exph5	-2.09862	0.000121998	0.00760775	chr9:53301670-53381158		1322.59	2775.59	-1.06943	69888	Downregulated	No eCLIP peak	170716	175	Downregulated without peak
Pcnt	-2.09339	0.000251173	0.011604	chr10:76351254-76442912		111.123	233.102	-1.06881	82183	Non-regulated	eCLIP Peak	173018	176	Non-regulated
Zfp407	-2.0917	0.00268285	0.0486606	chr18:84207701-84589505		62.8693	131.976	-1.06985	429858	Non-regulated	eCLIP Peak	173549	177	Non-regulated
Epas1	-2.0913	0.000618404	0.0203355	chr17:86753699-86833410		75.4879	157.54	-1.0614	74195	Non-regulated	eCLIP Peak	176053	178	Non-regulated
Deptor	-2.09067	2.33682e-06	0.000624882	chr15:55112315-55259273		9110.76	19047.2	-1.06394	138408	Downregulated	eCLIP Peak	173704	179	Downregulated with peak
Sash1	-2.08957	0.000142052	0.0082547	chr10:8722219-8886070		164.313	342.653	-1.06031	156669	Downregulated	eCLIP Peak	175778	180	Downregulated with peak
Ptpru	-2.08808	3.33636e-10	4.5772e-07	chr4:131768457-131838288		516.143	1078.51	-1.0632	64348	Downregulated	No eCLIP peak	173365	181	Downregulated without peak
Cacna1h	-2.08723	8.00405e-06	0.00138038	chr17:25374288-25433784		1743.8	3640.91	-1.06206	51269	Downregulated	eCLIP Peak	175168	182	Downregulated with peak
Slc24a4	-2.08381	0.0218344	0.171364	chr12:102128726-102267133		56.465	117.984	-1.06316	133894	Non-regulated	No eCLIP peak	175923	183	Non-regulated
Limch1	-2.08045	0.00794847	0.0923779	chr5:66745867-67057159		1152.91	2398.55	-1.05688	303816	Non-regulated	eCLIP Peak	174738	184	Non-regulated
Bmp7	-2.07763	0.00893517	0.0992896	chr2:172868012-172940321		56.1035	116.615	-1.05559	68640	Non-regulated	No eCLIP peak	171762	185	Non-regulated
Gad1	-2.07703	5.20185e-05	0.00433711	chr2:70562129-70602012		181.476	376.835	-1.05415	36618	Downregulated	No eCLIP peak	173128	186	Downregulated without peak
Nos1ap	-2.07656	0.0708839	0.342754	chr1:170315467-170589851		55.0498	114.255	-1.05345	269381	Non-regulated	eCLIP Peak	173134	187	Non-regulated
Slk	-2.07494	4.30973e-05	0.003788	chr19:47579678-47645245		608.599	1263.04	-1.05334	58291	Downregulated	No eCLIP peak	170481	188	Downregulated without peak
6530402F18Rik	-2.07259	0.101066	0.423793	chr2:29243238-29252993		146.623	304.1	-1.05243	3586	Non-regulated	No eCLIP peak	171385	189	Non-regulated
Ttc22	-2.06777	0.0985772	0.417462	chr4:106622448-106640190		15.3511	31.9053	-1.05546	15204	Non-regulated	No eCLIP peak	173202	190	Non-regulated
Flrt1	-2.06231	3.87305e-07	0.000152854	chr19:7092014-7105733		1035.47	2135.97	-1.04461	7857	Downregulated	No eCLIP peak	173007	191	Downregulated without peak
Traf3	-2.05693	0.000148658	0.00851319	chr12:111166369-111267155		433.742	891.265	-1.03902	93812	Downregulated	eCLIP Peak	181350	192	Downregulated with peak
Bicd2	-2.05653	0.000710792	0.0220751	chr13:49341549-49387025		107.704	222.141	-1.04441	39126	Non-regulated	No eCLIP peak	173454	193	Non-regulated
Plxnb2	-2.05534	0.000122447	0.00761521	chr15:89155546-89180790		576.341	1185.26	-1.04021	18743	Downregulated	No eCLIP peak	173697	194	Downregulated without peak
Tmem245	-2.05442	8.74267e-07	0.000290385	chr4:56874498-56947429		545.152	1120.56	-1.03949	64534	Downregulated	No eCLIP peak	180051	195	Downregulated without peak
Myt1l	-2.05319	3.16218e-06	0.000752486	chr12:29527636-29923213		864.444	1775.28	-1.0382	387628	Downregulated	eCLIP Peak	182360	196	Downregulated with peak
Hs6st2	-2.05191	0.341202	0.764093	chrX:51386637-51681602		42.3243	86.9117	-1.03806	290294	Non-regulated	No eCLIP peak	179238	197	Non-regulated
Tln2	-2.05149	0.000127583	0.00774332	chr9:67217087-67559703		722.943	1483.74	-1.03729	330485	Downregulated	eCLIP Peak	176869	198	Downregulated with peak
Chd3	-2.05107	1.21502e-07	6.4981e-05	chr11:69343273-69369426		5732.98	11759.5	-1.03647	18873	Downregulated	eCLIP Peak	173801	199	Downregulated with peak
Tet1	-2.04698	0.000463076	0.0168146	chr10:62804570-62908996		365.279	748.108	-1.03425	80173	Non-regulated	No eCLIP peak	174387	200	Non-regulated
Gm10451	-2.04638	0.461969	0.84416	chr12:76444497-76451336		111.248	227.562	-1.03248	5179	Non-regulated	No eCLIP peak	172021	201	Non-regulated
Sh3pxd2a	-2.04479	8.8971e-10	1.03977e-06	chr19:47260174-47464418		770.14	1575.36	-1.03249	193774	Downregulated	eCLIP Peak	173900	202	Downregulated with peak
Prrc2b	-2.0439	7.86134e-05	0.00583663	chr2:32151148-32234536		7880.85	16108.2	-1.03137	74844	Downregulated	eCLIP Peak	176069	203	Downregulated with peak
Bsn	-2.04387	1.19546e-06	0.000373481	chr9:108096023-108190383		14032	28680.7	-1.03136	78425	Downregulated	eCLIP Peak	176336	204	Downregulated with peak
Zeb2	-2.04334	0.03931	0.24288	chr2:44983512-45117442		1093.27	2234.07	-1.03103	124640	Non-regulated	eCLIP Peak	179958	205	Non-regulated
Elfn2	-2.04332	5.92927e-06	0.00108774	chr15:78667324-78718771		2025.64	4139.97	-1.03124	43246	Downregulated	eCLIP Peak	180103	206	Downregulated with peak
Igsf9b	-2.03819	6.43139e-05	0.00499842	chr9:27299104-27357549		565.465	1152.54	-1.0273	42199	Downregulated	eCLIP Peak	177184	207	Downregulated with peak
Scn8a	-2.03817	5.5309e-05	0.00449799	chr15:100869858-101045938		4920.75	10029.4	-1.02728	163954	Downregulated	eCLIP Peak	177617	208	Downregulated with peak
Csmd2	-2.03657	0.00157645	0.0352789	chr4:127988042-128567659		281.428	573.702	-1.02754	566058	Non-regulated	eCLIP Peak	182643	209	Non-regulated
Tecpr2	-2.03053	0.00064723	0.0208182	chr12:110889264-110972394		693.552	1408.73	-1.02232	75353	Non-regulated	No eCLIP peak	176276	210	Non-regulated
Usf3	-2.03001	8.27405e-05	0.00600183	chr16:44173397-44227463		1068.26	2168.12	-1.02119	41512	Downregulated	eCLIP Peak	177645	211	Downregulated with peak
Bclaf1	-2.02913	1.25856e-05	0.00190012	chr10:20312469-20344613		2064.61	4189.45	-1.02089	24726	Downregulated	No eCLIP peak	179862	212	Downregulated without peak
Trf	-2.02639	4.7734e-06	0.000941374	chr9:103204001-103230318		151.435	306.838	-1.01878	23934	Downregulated	No eCLIP peak	179635	213	Downregulated without peak
Wnt5a	-2.02369	0.000165233	0.00900896	chr14:28505473-28527447		83.8636	170.329	-1.02221	15689	Downregulated	No eCLIP peak	176080	214	Downregulated without peak
Dab2ip	-2.02359	1.51264e-08	1.25604e-05	chr2:35558458-35730994		905.385	1832.98	-1.01759	167149	Downregulated	eCLIP Peak	180685	215	Downregulated with peak
Dcc	-2.02296	0.00498165	0.0690949	chr18:71253632-72351070		211.771	428.368	-1.01634	1087113	Non-regulated	eCLIP Peak	180932	216	Non-regulated
Clip1	-2.02277	1.16485e-05	0.0018169	chr5:123577794-123684361		1978.96	4003.5	-1.01652	100691	Downregulated	No eCLIP peak	181011	217	Downregulated without peak
Plxna4	-2.02056	0.0305658	0.209386	chr6:32144294-32588192		475.922	961.398	-1.01441	431048	Non-regulated	eCLIP Peak	172678	218	Non-regulated
Upf2	-2.0204	0.000168348	0.00909023	chr2:5951469-6056703		271.424	548.575	-1.01514	100061	Downregulated	No eCLIP peak	170383	219	Downregulated without peak
Mobp	-2.01835	0.0394039	0.243174	chr9:120149741-120181488		35.1946	71.5173	-1.02294	29134	Non-regulated	No eCLIP peak	176533	220	Non-regulated
Ubn2	-2.0165	0.00021146	0.0105077	chr6:38433834-38771224		533.395	1075.36	-1.01154	78507	Non-regulated	No eCLIP peak	170081	221	Non-regulated
Scube1	-2.0114	6.74768e-05	0.00516787	chr15:83602583-83725039		6846.43	13771.4	-1.00825	114183	Downregulated	eCLIP Peak	169580	222	Downregulated with peak
Kremen1	-2.01123	0.0407114	0.248138	chr11:5191555-5261623		35.8378	72.4181	-1.01487	65151	Non-regulated	eCLIP Peak	170336	223	Non-regulated
Mag	-2.00964	1.9698e-05	0.0024763	chr7:30899175-30914922		100.703	202.365	-1.00686	13223	Downregulated	No eCLIP peak	169812	224	Downregulated without peak
Arid4a	-2.00691	0.00276335	0.0495223	chr12:71015967-71099351		114.881	230.833	-1.00671	77605	Non-regulated	No eCLIP peak	170434	225	Non-regulated
Inpp4a	-2.00488	0.000191664	0.00987547	chr1:37299838-37410740		1733.3	3475.49	-1.0037	105155	Downregulated	eCLIP Peak	171175	226	Downregulated with peak
Ppp1r9a	-2.00431	1.47544e-05	0.00205459	chr6:4902974-5165661		1197.99	2401.67	-1.00341	252795	Downregulated	eCLIP Peak	170501	227	Downregulated with peak
Unc80	-2.00423	0.00127289	0.0315019	chr1:66467934-66699150		931.611	1867.45	-1.00327	217169	Non-regulated	eCLIP Peak	168885	228	Non-regulated
Tns1	-2.00191	4.78998e-05	0.00411833	chr1:73910232-74124548		836.374	1674.97	-1.00191	204314	Downregulated	eCLIP Peak	167799	229	Downregulated with peak
Rfx3	-2.0002	0.012545	0.122829	chr19:27761721-28011167		159.607	319.768	-1.0025	240334	Non-regulated	No eCLIP peak	169639	230	Non-regulated
Nav3	-1.99916	0.00889232	0.0991477	chr10:109681260-110455859		3383.49	6764.08	-0.999382	764206	Non-regulated	eCLIP Peak	169355	231	Non-regulated
Fetub	-1.99734	0.189972	0.597942	chr16:22918330-22939778		217.06	433.657	-0.99846	19873	Non-regulated	No eCLIP peak	165742	232	Non-regulated
Wrn	-1.99638	0.00511543	0.0702341	chr8:33234373-33385528		64.0547	127.46	-0.992664	144882	Non-regulated	eCLIP Peak	174434	233	Non-regulated
Grm5	-1.99588	0.0890223	0.392323	chr7:87584168-88135063		167.151	333.621	-0.99706	542468	Non-regulated	eCLIP Peak	186041	234	Non-regulated
Dscaml1	-1.99454	1.7016e-05	0.00221868	chr9:45426627-45753713		1017.16	2029.6	-0.996646	316536	Downregulated	eCLIP Peak	180824	235	Downregulated with peak
Kcnh1	-1.99317	0.274821	0.706334	chr1:192190777-192510158		159.94	318.867	-0.995423	312144	Non-regulated	eCLIP Peak	177926	236	Non-regulated
Med13l	-1.98971	7.90405e-05	0.00584085	chr5:118560428-118765438		431.005	857.323	-0.992135	195424	Downregulated	eCLIP Peak	173566	237	Downregulated with peak
Xylt1	-1.98914	0.00234055	0.0446806	chr7:117380978-117667630		215.551	428.417	-0.99099	283582	Non-regulated	eCLIP Peak	171272	238	Non-regulated
Zfp704	-1.9891	0.000435803	0.0162738	chr3:9427010-9610085		1722.88	3426.84	-0.992053	169232	Non-regulated	eCLIP Peak	172669	239	Non-regulated
Pde1c	-1.98894	0.0115754	0.11733	chr6:56069804-56369634		235.262	468.333	-0.993266	577613	Non-regulated	eCLIP Peak	179509	240	Non-regulated
Etl4	-1.98783	0.000939347	0.0259546	chr2:19909778-20810535		344.929	685.497	-0.990854	832174	Non-regulated	eCLIP Peak	170922	241	Non-regulated
Asxl2	-1.98528	0.000189317	0.00982516	chr12:3426856-3506852		500.218	993.235	-0.989579	68062	Downregulated	eCLIP Peak	168446	242	Downregulated with peak
Fam117a	-1.98218	0.00478854	0.0674844	chr11:95337016-95381871		44.2308	86.6913	-0.970838	42538	Non-regulated	No eCLIP peak	172996	243	Non-regulated
Hip1	-1.97897	0.000991417	0.0268115	chr5:135406496-135545122		481.616	953.315	-0.985071	130750	Non-regulated	eCLIP Peak	169173	244	Non-regulated
Mcf2l	-1.97868	0.000261163	0.0118743	chr8:12873806-13020505		1640.61	3246.38	-0.984602	141301	Non-regulated	eCLIP Peak	168089	245	Non-regulated
Ptprt	-1.97771	0.0643639	0.324149	chr2:161521889-162661148		2461.56	4868.37	-0.983865	1127046	Non-regulated	eCLIP Peak	165241	246	Non-regulated
Yeats2	-1.97757	0.0068498	0.0843155	chr16:20141063-20232573		87.3598	172.751	-0.983657	85514	Non-regulated	No eCLIP peak	155693	247	Non-regulated
Neurl1b	-1.97728	1.34784e-05	0.00195091	chr17:26414859-26446340		899.167	1777.46	-0.98316	25190	Downregulated	eCLIP Peak	156364	248	Downregulated with peak
Ebf2	-1.97712	0.153595	0.535393	chr14:67233291-67430952		165.612	327.617	-0.984198	192129	Non-regulated	eCLIP Peak	166774	249	Non-regulated
Plp1	-1.97618	2.33471e-06	0.000624882	chrX:136820148-136838582		291.822	575.725	-0.980294	12364	Downregulated	No eCLIP peak	165975	250	Downregulated without peak
Mgam	-1.97565	0.19899	0.61222	chr6:40628831-40769123		13.6313	26.4922	-0.958649	133805	Non-regulated	No eCLIP peak	175272	251	Non-regulated
Kif1c	-1.97476	0.00128996	0.0317747	chr11:70700546-70731970		117.23	231.716	-0.98302	24733	Non-regulated	No eCLIP peak	168149	252	Non-regulated
Tnrc6b	-1.97423	3.72129e-05	0.00341706	chr15:80711312-80941086		2025.15	3998.36	-0.981377	212441	Downregulated	eCLIP Peak	167972	253	Downregulated with peak
Eea1	-1.96926	0.110206	0.44405	chr10:95940648-96045518		129.981	255.743	-0.976396	97020	Non-regulated	eCLIP Peak	166182	254	Non-regulated
Smad3	-1.96544	0.334763	0.756021	chr9:63646767-63758111		412.914	811.621	-0.974964	106138	Non-regulated	eCLIP Peak	165340	255	Non-regulated
Shank3	-1.96411	0.000404914	0.0155266	chr15:89499608-89560261		1397.07	2744.38	-0.974083	53274	Non-regulated	No eCLIP peak	164569	256	Non-regulated
Kif5a	-1.96304	0.0136733	0.129439	chr10:127225696-127263364		1964.1	3855.94	-0.973216	31358	Non-regulated	No eCLIP peak	163997	257	Non-regulated
Myo6	-1.96266	0.00152014	0.0348244	chr9:80165034-80311729		386.171	758.231	-0.973398	138828	Non-regulated	No eCLIP peak	165303	258	Non-regulated
Hivep3	-1.96262	6.12732e-08	3.86683e-05	chr4:119733778-120135411		1840.8	3613.32	-0.972992	311713	Downregulated	eCLIP Peak	164342	259	Downregulated with peak
Pdgfrb	-1.9611	0.0028564	0.050437	chr18:61045144-61085067		52.0952	102.388	-0.974828	34505	Non-regulated	eCLIP Peak	164329	260	Non-regulated
Tsc1	-1.96108	0.000835675	0.0245249	chr2:28641233-28691172		1810.53	3550.08	-0.971439	42257	Non-regulated	No eCLIP peak	171039	261	Non-regulated
Kcnj9	-1.95941	0.000145499	0.00835691	chr1:172320506-172329322		315.741	619.133	-0.971507	4961	Downregulated	No eCLIP peak	161827	262	Downregulated without peak
Myo5a	-1.9567	0.001832	0.0387186	chr9:75071013-75223688		725.197	1419.14	-0.968571	140799	Non-regulated	No eCLIP peak	181542	263	Non-regulated
Upf1	-1.95642	0.000271707	0.012141	chr8:70331493-70353283		1333.99	2610.53	-0.96859	17136	Non-regulated	eCLIP Peak	175889	264	Non-regulated
Ksr2	-1.95391	0.0234394	0.178828	chr5:117414000-117767986		45.689	89.4502	-0.969238	347879	Non-regulated	eCLIP Peak	173752	265	Non-regulated
Sipa1l1	-1.95346	2.31181e-05	0.00272189	chr12:82169420-82451782		2617.61	5113.3	-0.966003	274152	Downregulated	eCLIP Peak	180839	266	Downregulated with peak
Akap6	-1.9506	0.000534386	0.0184688	chr12:52699331-53151015		838.568	1636.02	-0.964189	441370	Non-regulated	eCLIP Peak	179880	267	Non-regulated
Ltbp4	-1.9485	0.00331275	0.055074	chr7:27305136-27337692		139.567	272.462	-0.965099	27171	Non-regulated	No eCLIP peak	179028	268	Non-regulated
Plekha6	-1.94456	0.000166454	0.00905568	chr1:133246097-133303435		296.344	576.138	-0.95914	114859	Downregulated	No eCLIP peak	176161	269	Downregulated without peak
Zfp512b	-1.94414	1.20877e-05	0.00186056	chr2:181582103-181592461		2154.7	4189.26	-0.959205	4987	Downregulated	eCLIP Peak	176177	270	Downregulated with peak
Nhs	-1.94358	0.00112008	0.0289461	chrX:161836430-162159441		275.287	534.69	-0.957766	317630	Non-regulated	eCLIP Peak	174364	271	Non-regulated
Prex1	-1.94164	0.000275539	0.0122144	chr2:166566345-166713832		884.808	1718.35	-0.957587	140958	Non-regulated	eCLIP Peak	171309	272	Non-regulated
Tet3	-1.93905	3.51679e-05	0.00332242	chr6:83362373-83456392		1181.02	2289.56	-0.955037	82407	Downregulated	eCLIP Peak	168885	273	Downregulated with peak
Med12l	-1.93883	0.0350237	0.226927	chr3:59005824-59318410		82.7259	160.618	-0.957226	301190	Non-regulated	eCLIP Peak	169984	274	Non-regulated
Trpc5	-1.93858	0.0172453	0.148745	chrX:144377327-144688281		118.266	229.087	-0.953864	302352	Non-regulated	No eCLIP peak	167023	275	Non-regulated
Uty	-1.93836	0.610187	0.905642	chrY:808362-1245760		105.508	204.462	-0.954488	143748	Non-regulated	No eCLIP peak	168257	276	Non-regulated
Sacs	-1.93779	0.0242195	0.182218	chr14:61138455-61240693		102.371	198.744	-0.957109	98894	Non-regulated	No eCLIP peak	169055	277	Non-regulated
Wnk1	-1.93564	8.70981e-05	0.00624307	chr6:119923971-120038657		2571.59	4977.3	-0.952701	104129	Downregulated	No eCLIP peak	165674	278	Downregulated without peak
Chd6	-1.93501	0.000848504	0.024637	chr2:160946978-161109086		431.475	835.318	-0.953049	151530	Non-regulated	eCLIP Peak	166759	279	Non-regulated
Gse1	-1.93311	0.000442649	0.0164161	chr8:120488866-120581381		557.138	1078.04	-0.952309	322675	Non-regulated	eCLIP Peak	165317	280	Non-regulated
Mical3	-1.93103	0.00127089	0.0315018	chr6:120931547-121131022		711.599	1374.68	-0.94996	140684	Non-regulated	eCLIP Peak	163354	281	Non-regulated
Larp1	-1.9308	6.51081e-06	0.0011807	chr11:58009064-58062034		5664.64	10937.6	-0.949245	46354	Downregulated	No eCLIP peak	162854	282	Downregulated without peak
Ntng2	-1.9297	0.0114216	0.116294	chr2:29194726-29248099		268.462	518.354	-0.949223	51628	Non-regulated	No eCLIP peak	162704	283	Non-regulated
Chd9	-1.92772	0.0405155	0.247469	chr8:90828833-91054508		103.811	200.019	-0.946181	214157	Non-regulated	eCLIP Peak	166476	284	Non-regulated
Golm1	-1.92588	0.00884716	0.0989121	chr13:59634626-59675786		185.041	356.328	-0.945365	37232	Non-regulated	No eCLIP peak	167736	285	Non-regulated
Gfy	-1.92544	0.23454	0.665946	chr7:45176349-45179597		1843.56	3549.76	-0.945229	1372	Non-regulated	No eCLIP peak	167473	286	Non-regulated
Cacna1b	-1.92442	0.000174257	0.00925673	chr2:24603909-24763158		154.549	297.546	-0.945047	149611	Downregulated	eCLIP Peak	168876	287	Downregulated with peak
Cd2ap	-1.92287	0.0602922	0.311419	chr17:42792951-42876666		48.5776	92.6457	-0.931434	78075	Non-regulated	No eCLIP peak	168377	288	Non-regulated
Ank1	-1.92196	8.04936e-06	0.00138038	chr8:22974836-23150496		4736.12	9103.03	-0.942642	167395	Downregulated	eCLIP Peak	168634	289	Downregulated with peak
Sfi1	-1.92119	0.000321043	0.0132826	chr11:3131850-3200652		79.6536	153.894	-0.950123	57685	Non-regulated	No eCLIP peak	163684	290	Non-regulated
Kdm5d	-1.92071	0.640305	0.905642	chrY:897787-956779		275.78	529.653	-0.941533	53033	Non-regulated	No eCLIP peak	168437	291	Non-regulated
Phf3	-1.91847	0.000242384	0.0113643	chr1:30802342-30873873		1274.32	2444.72	-0.939946	63676	Non-regulated	No eCLIP peak	168689	292	Non-regulated
Scarf2	-1.9168	0.0132297	0.126885	chr16:17797280-17808292		72.2176	139.069	-0.945374	7704	Non-regulated	No eCLIP peak	167682	293	Non-regulated
Cdkal1	-1.91391	0.00126961	0.0314948	chr13:29191746-29855673		198.368	380.072	-0.938094	660530	Non-regulated	eCLIP Peak	171239	294	Non-regulated
Cdc42bpa	-1.91331	0.000813856	0.0240559	chr1:179960777-180165603		1306.78	2500.1	-0.935969	195858	Non-regulated	eCLIP Peak	164871	295	Non-regulated
Dysf	-1.91066	0.0293503	0.204588	chr6:84008598-84211059		60.6552	116.052	-0.936072	195668	Non-regulated	eCLIP Peak	166541	296	Non-regulated
Ebf4	-1.90752	0.10225	0.42604	chr2:130295939-130370850		64.6772	123.582	-0.934136	72331	Non-regulated	No eCLIP peak	165626	297	Non-regulated
Tyrobp	-1.90743	0.165363	0.558059	chr7:30413782-30417577		13.9413	26.8964	-0.948047	3226	Non-regulated	No eCLIP peak	162354	298	Non-regulated
Fbf1	-1.90707	0.000103703	0.00686003	chr11:116142285-116168178		356.103	679.29	-0.931731	20617	Downregulated	eCLIP Peak	167690	299	Downregulated with peak
Camk1d	-1.90652	0.00111866	0.028933	chr2:5293458-5714763		180.471	343.947	-0.930419	414097	Non-regulated	No eCLIP peak	172630	300	Non-regulated
Map9	-1.90643	0.000279385	0.0122782	chr3:82358043-82395268		656.625	1251.56	-0.930585	30979	Non-regulated	No eCLIP peak	172659	301	Non-regulated
Rsf1	-1.90601	0.00198151	0.0406514	chr7:97579888-97692782		910.264	1734.64	-0.930283	101758	Non-regulated	eCLIP Peak	173010	302	Non-regulated
Anxa3	-1.9055	0.00134278	0.0325924	chr5:96793384-96845968		67.0918	128.056	-0.932564	50987	Non-regulated	No eCLIP peak	168083	303	Non-regulated
Slc10a4	-1.90493	7.48409e-10	9.44612e-07	chr5:73006903-73014683		462.517	881.498	-0.93045	3967	Downregulated	No eCLIP peak	172469	304	Downregulated without peak
Tnr	-1.90285	0.000952113	0.026079	chr1:159523768-159925292		1166.63	2220.45	-0.928505	395759	Non-regulated	eCLIP Peak	167607	305	Non-regulated
Lima1	-1.90215	0.0153925	0.138929	chr15:99778468-99875456		48.8266	92.4905	-0.92164	92744	Non-regulated	No eCLIP peak	167093	306	Non-regulated
Kif26a	-1.90203	0.000255132	0.0117353	chr12:112146208-112181749		247.406	471.358	-0.929943	28622	Non-regulated	No eCLIP peak	167587	307	Non-regulated
Mllt6	-1.90156	7.72929e-07	0.000262247	chr11:97663412-97685458		621.05	1181.48	-0.927809	14776	Downregulated	No eCLIP peak	164787	308	Downregulated without peak
Prr14l	-1.90005	0.000203907	0.0102291	chr5:32789207-32854232		1144.86	2175.05	-0.925878	54478	Non-regulated	No eCLIP peak	167004	309	Non-regulated
Frmpd3	-1.89965	0.00340778	0.0560514	chrX:140342263-140435467		461.095	876.154	-0.926119	85891	Non-regulated	No eCLIP peak	166883	310	Non-regulated
Kif13a	-1.89862	0.00413564	0.0623487	chr13:46749087-46929719		326.259	619.162	-0.924299	173766	Non-regulated	eCLIP Peak	167592	311	Non-regulated
Cacna1e	-1.89838	0.101432	0.424481	chr1:154392513-154884501		32.467	61.8593	-0.930016	458910	Non-regulated	eCLIP Peak	172109	312	Non-regulated
Ell3	-1.89834	0.281693	0.711552	chr2:121439010-121444279		210.383	399.485	-0.925123	3154	Non-regulated	No eCLIP peak	166602	313	Non-regulated
Kcna2	-1.89711	8.96553e-05	0.00635726	chr3:107101565-107115005		14337.4	27199.6	-0.923802	1857	Downregulated	No eCLIP peak	165629	314	Downregulated without peak
Phf21a	-1.8969	0.000257684	0.0118011	chr2:92184182-92364666		335.858	637.235	-0.923973	265363	Non-regulated	No eCLIP peak	167180	315	Non-regulated
Map3k1	-1.89557	0.0170819	0.148037	chr13:111746428-111808993		115.308	218.853	-0.924465	55588	Non-regulated	eCLIP Peak	167734	316	Non-regulated
Arid4b	-1.89478	0.000321184	0.0132826	chr13:14063782-14199603		703.728	1333.37	-0.921987	129968	Non-regulated	No eCLIP peak	166553	317	Non-regulated
Zmiz1	-1.8946	2.52071e-06	0.000651956	chr14:25459185-25666741		5050.93	9569.73	-0.921929	200038	Downregulated	eCLIP Peak	166265	318	Downregulated with peak
Smg5	-1.89362	5.46685e-05	0.00445739	chr3:88336260-88362338		1592.27	3015.35	-0.92124	21631	Downregulated	No eCLIP peak	166643	319	Downregulated without peak
Filip1	-1.8912	2.92374e-05	0.0030188	chr9:79801181-80012851		1514.2	2863.49	-0.919217	168736	Downregulated	eCLIP Peak	164652	320	Downregulated with peak
Arhgef28	-1.89099	0.162526	0.553365	chr13:97898595-98206439		466.052	881.438	-0.919367	301664	Non-regulated	No eCLIP peak	167155	321	Non-regulated
Chd4	-1.89005	0.000277099	0.0122405	chr6:125095979-125130590		3866.42	7307.79	-0.918436	27914	Non-regulated	No eCLIP peak	165714	322	Non-regulated
Wwc1	-1.88817	3.21942e-06	0.000752486	chr11:35838399-35980599		1336.79	2524.44	-0.917196	137597	Downregulated	eCLIP Peak	167072	323	Downregulated with peak
Ncoa7	-1.88777	3.6999e-05	0.00341706	chr10:30629026-30803328		3138.7	5923.42	-0.916265	152419	Downregulated	eCLIP Peak	166847	324	Downregulated with peak
Ncoa6	-1.88732	0.000349289	0.0139336	chr2:155390656-155473895		781.896	1476.07	-0.916709	76041	Non-regulated	No eCLIP peak	166488	325	Non-regulated
Wipf1	-1.88651	0.0196417	0.160296	chr2:73429610-73529487		39.4437	74.6911	-0.92114	95397	Non-regulated	eCLIP Peak	167163	326	Non-regulated
Unc13a	-1.88579	5.03046e-06	0.000979822	chr8:71624050-71671765		8219.9	15501.4	-0.915202	37086	Downregulated	eCLIP Peak	166024	327	Downregulated with peak
Cacna1a	-1.88305	4.91952e-05	0.00418411	chr8:84388440-84640249		4963.78	9347.27	-0.913106	293238	Downregulated	eCLIP Peak	165772	328	Downregulated with peak
Mbd5	-1.88101	3.57483e-05	0.00334719	chr2:49018254-49322284		1321.29	2484.97	-0.911282	361472	Downregulated	eCLIP Peak	168016	329	Downregulated with peak
Ttc28	-1.87936	0.0175939	0.150246	chr5:110879803-111289777		2138.8	4019.72	-0.910292	399290	Non-regulated	eCLIP Peak	164490	330	Non-regulated
Zfp236	-1.87922	0.00385946	0.0598663	chr18:82593593-82692915		82.7337	156.002	-0.915015	89665	Non-regulated	No eCLIP peak	166319	331	Non-regulated
Ptprd	-1.87808	0.021799	0.171248	chr4:75941237-78211854		6310.19	11851	-0.909258	2070042	Non-regulated	eCLIP Peak	161683	332	Non-regulated
Trarg1	-1.87723	0.191148	0.59985	chr11:76679873-76698664		252.68	474.48	-0.909034	15555	Non-regulated	No eCLIP peak	141872	333	Non-regulated
Drd2	-1.87437	0.0994196	0.419654	chr9:49340403-49408177		61.7693	115.717	-0.905636	65004	Non-regulated	No eCLIP peak	139750	334	Non-regulated
Lrrc7	-1.8734	0.00546463	0.0733008	chr3:158067186-158562221		573.638	1075.01	-0.906132	472006	Non-regulated	eCLIP Peak	143028	335	Non-regulated
Eml5	-1.87336	0.00156034	0.0351853	chr12:98786604-98901485		161.418	302.025	-0.903866	104886	Non-regulated	No eCLIP peak	138763	336	Non-regulated
Fan1	-1.87255	0.00112608	0.0290118	chr7:64345385-64374084		149.934	280.999	-0.906231	23863	Non-regulated	eCLIP Peak	142157	337	Non-regulated
Ptprs	-1.87221	0.000116311	0.00734786	chr17:56412426-56476480		9507.53	17800.4	-0.904765	57196	Downregulated	No eCLIP peak	139296	338	Downregulated without peak
Cachd1	-1.86879	9.73608e-06	0.00160006	chr4:100776673-101029220		537.057	1004.18	-0.902869	248269	Downregulated	No eCLIP peak	138121	339	Downregulated without peak
Slit3	-1.86714	0.00789432	0.0919295	chr11:35121456-35712029		334.926	625.433	-0.901014	582056	Non-regulated	eCLIP Peak	136799	340	Non-regulated
Apcdd1	-1.86674	0.00022816	0.011025	chr18:62922322-62955978		199.856	373.899	-0.903687	28070	Non-regulated	eCLIP Peak	138372	341	Non-regulated
Epha4	-1.86626	0.39064	0.793776	chr1:77367185-77515088		275.747	514.68	-0.90033	141576	Non-regulated	eCLIP Peak	132469	342	Non-regulated
Pcdh15	-1.86423	0.0137609	0.129788	chr10:73821867-74649730		140.349	261.163	-0.895932	1215487	Non-regulated	eCLIP Peak	131617	343	Non-regulated
Zfyve26	-1.86206	0.0552239	0.295905	chr12:79232345-79296302		21.4313	40.3109	-0.911453	54568	Non-regulated	No eCLIP peak	164592	344	Non-regulated
Plxna1	-1.86146	4.2902e-06	0.000879046	chr6:89316316-89362613		454.002	845.164	-0.896533	37273	Downregulated	No eCLIP peak	133892	345	Downregulated without peak
Ncor2	-1.86119	1.48459e-05	0.00205459	chr5:125017153-125179214		3390.77	6311.87	-0.896455	153259	Downregulated	eCLIP Peak	132381	346	Downregulated with peak
Kdm6b	-1.86086	2.24601e-05	0.0026947	chr11:69398535-69416194		350.754	653.609	-0.89797	8514	Downregulated	No eCLIP peak	133674	347	Downregulated without peak
Xkr7	-1.86037	0.00481899	0.0677511	chr2:153031852-153055774		77.9478	145.408	-0.89953	21213	Non-regulated	No eCLIP peak	133587	348	Non-regulated
Cep295	-1.85819	0.00421573	0.0629987	chr9:15316914-15357788		100.619	186.855	-0.893024	33264	Non-regulated	No eCLIP peak	122560	349	Non-regulated
Zfp811	-1.85756	0.00270226	0.0488637	chr17:32795678-32809931		136.797	254.147	-0.89363	10720	Non-regulated	No eCLIP peak	121306	350	Non-regulated
Sult1d1	-1.85658	0.317419	0.750602	chr5:87554651-87569006		229.007	425.265	-0.892972	11963	Non-regulated	No eCLIP peak	124505	351	Non-regulated
Lekr1	-1.85615	0.00794168	0.0923331	chr3:65666228-65831162		93.651	174.334	-0.896484	162734	Non-regulated	eCLIP Peak	133901	352	Non-regulated
Rab3d	-1.85586	0.0173816	0.149362	chr9:21907492-21918184		155.15	288.298	-0.893892	6867	Non-regulated	No eCLIP peak	119617	353	Non-regulated
Zfp114	-1.85178	0.00329744	0.0549933	chr7:24175022-24183170		116.225	215.767	-0.892551	4079	Non-regulated	No eCLIP peak	124452	354	Non-regulated
Cacng4	-1.85014	2.87319e-06	0.000692066	chr11:107732357-107794706		508.444	942.158	-0.889879	58701	Downregulated	eCLIP Peak	124615	355	Downregulated with peak
Ksr1	-1.85012	1.23583e-05	0.00189299	chr11:79013441-79146475		940.602	1740.89	-0.888167	127473	Downregulated	eCLIP Peak	125227	356	Downregulated with peak
Tac1	-1.84904	0.417995	0.807762	chr6:7555061-7562978		338.389	625.749	-0.8869	6869	Non-regulated	No eCLIP peak	124912	357	Non-regulated
Cacna1g	-1.84394	1.30896e-05	0.00192572	chr11:94408371-94474198		636.103	1173.22	-0.883141	57654	Downregulated	No eCLIP peak	128366	358	Downregulated without peak
Nav1	-1.84366	0.0160899	0.142773	chr1:135398557-135607295		10063.4	18553.5	-0.882578	239905	Non-regulated	eCLIP Peak	127409	359	Non-regulated
Gm15510	-1.84329	0.120088	0.465467	chr7:5046947-5057119		36.7898	67.5273	-0.876166	8996	Non-regulated	No eCLIP peak	122970	360	Non-regulated
Unc5d	-1.84322	0.00152791	0.0348244	chr8:28646717-29219637		520.446	959.24	-0.882143	563700	Non-regulated	eCLIP Peak	123973	361	Non-regulated
Abca1	-1.84287	0.00325282	0.0545084	chr4:53030789-53159896		610.853	1125.94	-0.882228	118847	Non-regulated	No eCLIP peak	125039	362	Non-regulated
Sox5	-1.84219	0.00032079	0.0132826	chr6:143828425-144209568		360.616	665.088	-0.883082	935448	Non-regulated	eCLIP Peak	135017	363	Non-regulated
BC049352	-1.84163	0.143413	0.51564	chr9:45182032-45249989		62.9601	116.138	-0.883331	66219	Non-regulated	No eCLIP peak	128304	364	Non-regulated
Foxp1	-1.8411	0.000558542	0.0189437	chr6:98925342-99521163		719.604	1325.01	-0.880725	588082	Non-regulated	eCLIP Peak	118395	365	Non-regulated
Zfp292	-1.83992	0.00294284	0.0515307	chr4:34803110-34882961		726.339	1336.24	-0.879461	69862	Non-regulated	No eCLIP peak	115028	366	Non-regulated
Pan3	-1.83893	0.00354644	0.0571232	chr5:147430156-147548501		675.941	1242.88	-0.878719	113294	Non-regulated	No eCLIP peak	115607	367	Non-regulated
Lrp8	-1.8388	0.000655684	0.0209407	chr4:107802259-107876840		499.053	917.401	-0.878361	67286	Non-regulated	eCLIP Peak	117364	368	Non-regulated
Gcnt1	-1.8388	2.29524e-05	0.00271509	chr19:17326136-17372846		197.674	362.848	-0.876246	42130	Downregulated	No eCLIP peak	119006	369	Downregulated without peak
Ttc3	-1.83876	0.0010673	0.0281116	chr16:94370737-94469221		17347.1	31896.9	-0.87872	91188	Non-regulated	No eCLIP peak	115799	370	Non-regulated
Ppig	-1.83643	5.11235e-05	0.00431324	chr2:69722544-69754059		1152.32	2115.99	-0.876793	25081	Downregulated	No eCLIP peak	118878	371	Downregulated without peak
Eif4g3	-1.83423	1.38465e-05	0.00199503	chr4:137993455-138207086		4660.3	8548.27	-0.875208	207353	Downregulated	eCLIP Peak	126849	372	Downregulated with peak
Carns1	-1.83267	0.0120661	0.120257	chr19:4164324-4175479		150.858	276.84	-0.875861	7188	Non-regulated	No eCLIP peak	123128	373	Non-regulated
Tfrc	-1.83075	0.00206735	0.0415497	chr16:32608896-32632794		426.379	780.452	-0.872171	18985	Non-regulated	No eCLIP peak	124115	374	Non-regulated
Kcnb1	-1.83049	4.56138e-06	0.000910949	chr2:167095969-167190104		4260.84	7799.35	-0.872215	81697	Downregulated	eCLIP Peak	124890	375	Downregulated with peak
Celf5	-1.82979	0.0016575	0.036233	chr10:81459227-81482699		785.488	1437.6	-0.872004	19092	Non-regulated	eCLIP Peak	123933	376	Non-regulated
Lhx1	-1.82978	0.0959468	0.410064	chr11:84517975-84525537		30.7827	56.5783	-0.87813	3406	Non-regulated	No eCLIP peak	118510	377	Non-regulated
Tshz2	-1.82953	9.6785e-05	0.00661291	chr2:169632509-170072750		4238.83	7755.52	-0.871559	275767	Downregulated	eCLIP Peak	125276	378	Downregulated with peak
Nemf	-1.82872	0.00400516	0.0613788	chr12:69310522-69357176		182.279	333.323	-0.870775	41912	Non-regulated	No eCLIP peak	122657	379	Non-regulated
Zfp827	-1.82848	1.14036e-05	0.00180053	chr8:79028268-79193765		350.515	640.678	-0.870124	157726	Downregulated	eCLIP Peak	127155	380	Downregulated with peak
Pnisr	-1.82704	0.00532431	0.0719985	chr4:21847719-21876475		291.55	532.799	-0.869845	24348	Non-regulated	No eCLIP peak	125927	381	Non-regulated
Casp8ap2	-1.82693	0.0165569	0.14493	chr4:32615470-32653271		272.811	497.665	-0.867275	31236	Non-regulated	No eCLIP peak	125812	382	Non-regulated
Lrp1	-1.82588	0.000549906	0.0187784	chr10:127538194-127621149		319.142	583.456	-0.870425	68100	Non-regulated	No eCLIP peak	123067	383	Non-regulated
C2cd3	-1.82504	0.000891154	0.0253328	chr7:100372233-100470159		312.947	571.602	-0.869091	90115	Non-regulated	No eCLIP peak	125761	384	Non-regulated
Trrap	-1.822	0.00133102	0.0324065	chr5:144768147-144859778		130.823	237.974	-0.863189	78506	Non-regulated	eCLIP Peak	124949	385	Non-regulated
Upf3b	-1.8214	0.000181627	0.00955101	chrX:37091680-37110340		266.388	485.654	-0.866396	16301	Downregulated	No eCLIP peak	126042	386	Downregulated without peak
Fstl4	-1.82044	0.00240334	0.0453288	chr11:52764655-53187347		702.575	1279.8	-0.865194	419525	Non-regulated	eCLIP Peak	126502	387	Non-regulated
Tcf4	-1.82043	0.131093	0.490107	chr18:69344146-69687967		710.101	1292.81	-0.864412	336014	Non-regulated	eCLIP Peak	128203	388	Non-regulated
Herc1	-1.81993	0.000450904	0.0166213	chr9:66350449-66508775		3579.72	6514.62	-0.863836	143097	Non-regulated	No eCLIP peak	126993	389	Non-regulated
Zfp462	-1.81983	0.00151214	0.0347527	chr4:54947945-55083562		694.093	1263.12	-0.863793	125123	Non-regulated	eCLIP Peak	126586	390	Non-regulated
Arfgef3	-1.81935	0.03306	0.21957	chr10:18585490-18743956		1037.96	1888.41	-0.863418	147532	Non-regulated	eCLIP Peak	125662	391	Non-regulated
Dnajb13	-1.81908	0.416508	0.806238	chr7:100501716-100514960		72.4914	131.949	-0.864095	10653	Non-regulated	No eCLIP peak	126712	392	Non-regulated
Apc2	-1.81891	0.00267324	0.0485615	chr10:80295956-80318257		522.273	950.754	-0.864268	13114	Non-regulated	No eCLIP peak	125329	393	Non-regulated
Cchcr1	-1.81835	7.53931e-08	4.48859e-05	chr17:35517049-35531015		191.067	347.19	-0.861648	11241	Downregulated	No eCLIP peak	126477	394	Downregulated without peak
Pakap	-1.81812	2.64875e-05	0.00292364	chr4:57434474-57898528		3279.59	5963.14	-0.862558	321228	Downregulated	eCLIP Peak	127649	395	Downregulated with peak
Plxna2	-1.81803	0.000790149	0.0236041	chr1:194619829-194816853		389.984	708.829	-0.86202	186005	Non-regulated	eCLIP Peak	131660	396	Non-regulated
Nktr	-1.81792	0.0461371	0.267143	chr9:121719168-121756841		75.9387	137.612	-0.857696	30646	Non-regulated	No eCLIP peak	121220	397	Non-regulated
Creg2	-1.81756	0.000128991	0.00780644	chr1:39618406-39651479		3290.92	5981.46	-0.862007	26978	Downregulated	No eCLIP peak	130665	398	Downregulated without peak
Gria3	-1.81729	0.326132	0.750602	chrX:41400819-41678601		378.665	688.227	-0.861964	272106	Non-regulated	No eCLIP peak	130511	399	Non-regulated
Plcb4	-1.81726	0.0661414	0.329704	chr2:135659009-136014593		2409.11	4377.89	-0.861738	320559	Non-regulated	eCLIP Peak	129474	400	Non-regulated
Robo2	-1.81569	0.040224	0.246309	chr16:73891845-75447293		1398.55	2539.29	-0.860493	510560	Non-regulated	eCLIP Peak	126010	401	Non-regulated
Plcb3	-1.8146	0.000542177	0.0186001	chr19:6952325-6969814		213.88	388.211	-0.86004	11845	Non-regulated	No eCLIP peak	122400	402	Non-regulated
Nfix	-1.81443	0.00839391	0.0958225	chr8:84704734-84800368		450.708	818.367	-0.860557	90001	Non-regulated	No eCLIP peak	126441	403	Non-regulated
Stom	-1.81428	0.26148	0.694663	chr2:35313986-35337009		1491.34	2705.82	-0.859457	20204	Non-regulated	No eCLIP peak	124387	404	Non-regulated
Phactr1	-1.81301	0.107144	0.437422	chr13:42680796-43138495		1271.75	2305.86	-0.858487	452472	Non-regulated	eCLIP Peak	124323	405	Non-regulated
E130008D07Rik	-1.81194	0.355242	0.779725	chr17:43146041-43158294		94.8465	171.938	-0.858223	10713	Non-regulated	No eCLIP peak	119967	406	Non-regulated
Uncx	-1.81085	0.0824954	0.37412	chr5:139543896-139603226		91.09	165.096	-0.857937	2188	Non-regulated	No eCLIP peak	120829	407	Non-regulated
Fam193a	-1.81	5.59956e-05	0.00451181	chr5:34369933-34486457		1656.65	2998.94	-0.856188	110988	Downregulated	eCLIP Peak	121689	408	Downregulated with peak
Gas7	-1.8096	0.000347767	0.0139098	chr11:67532996-67688992		973.928	1762.88	-0.856044	226429	Non-regulated	eCLIP Peak	120799	409	Non-regulated
Agap2	-1.80855	0.0504331	0.280961	chr10:127078906-127093169		7467.9	13506.3	-0.854857	13810	Non-regulated	No eCLIP peak	119232	410	Non-regulated
Huwe1	-1.80727	0.0011263	0.0290118	chrX:151803241-151935409		6128.62	11076	-0.853801	117512	Non-regulated	eCLIP Peak	119530	411	Non-regulated
Jcad	-1.80667	0.393183	0.793776	chr18:4634926-4682868		516.084	932.431	-0.853391	41210	Non-regulated	No eCLIP peak	118724	412	Non-regulated
Ece1	-1.80632	0.0156044	0.140216	chr4:137862236-137965228		180.183	326.036	-0.855565	98177	Non-regulated	eCLIP Peak	119980	413	Non-regulated
Inpp5d	-1.80545	0.0193804	0.159163	chr1:87620312-87720510		93.6127	168.768	-0.850263	95259	Non-regulated	No eCLIP peak	123106	414	Non-regulated
Ctnna1	-1.80305	0.0014022	0.0332997	chr18:35118887-35254779		246.837	445.927	-0.85325	132188	Non-regulated	No eCLIP peak	120203	415	Non-regulated
Scn3a	-1.80247	0.000893932	0.0253832	chr2:65457118-65567532		225.29	406.147	-0.850219	100815	Non-regulated	No eCLIP peak	122340	416	Non-regulated
Esf1	-1.80233	0.00451114	0.065252	chr2:140119881-140170566		450.298	811.49	-0.849692	47286	Non-regulated	No eCLIP peak	120621	417	Non-regulated
Trio	-1.8023	7.28433e-06	0.00128641	chr15:27730650-28025926		3922.38	7069.75	-0.84993	283703	Downregulated	eCLIP Peak	122235	418	Downregulated with peak
Nrp2	-1.8012	0.00193201	0.039871	chr1:62703317-62818692		342.283	617.258	-0.850684	108688	Non-regulated	eCLIP Peak	119721	419	Non-regulated
Kcnh5	-1.79819	0.000153428	0.00874516	chr12:74897217-75177333		201.319	361.712	-0.845354	276055	Downregulated	eCLIP Peak	119639	420	Downregulated with peak
4933427D14Rik	-1.79801	0.00892683	0.0992896	chr11:72153929-72207482		224.732	403.803	-0.845443	48878	Non-regulated	eCLIP Peak	119956	421	Non-regulated
Pbrm1	-1.79731	0.0029597	0.0516826	chr14:31019138-31121592		308.363	554.205	-0.84579	94548	Non-regulated	No eCLIP peak	120165	422	Non-regulated
Myh9	-1.79712	0.00124054	0.0309439	chr15:77760585-77842175		606.396	1090.68	-0.846894	74156	Non-regulated	eCLIP Peak	120434	423	Non-regulated
Kat6b	-1.79613	0.000940446	0.0259622	chr14:21499769-21672478		152.704	274.288	-0.844955	165045	Non-regulated	eCLIP Peak	118602	424	Non-regulated
Nexmif	-1.79411	0.00648638	0.0822303	chrX:104077432-104201187		246.938	442.963	-0.843033	112276	Non-regulated	eCLIP Peak	117474	425	Non-regulated
Setd5	-1.79386	4.65005e-06	0.000922815	chr6:113077364-113153432		3926.1	7042.66	-0.843022	69316	Downregulated	No eCLIP peak	116571	426	Downregulated without peak
Sec14l5	-1.79293	0.000307998	0.0130101	chr16:5147109-5183934		183.734	329.479	-0.842568	34423	Non-regulated	No eCLIP peak	135459	427	Non-regulated
Tnik	-1.79285	2.93463e-05	0.0030188	chr3:28263214-28675755		787.836	1411.98	-0.841747	400368	Downregulated	eCLIP Peak	137510	428	Downregulated with peak
Igsf3	-1.7925	0.00067362	0.0212554	chr3:101377081-101463060		444.869	798.048	-0.843096	78606	Non-regulated	eCLIP Peak	117194	429	Non-regulated
Hipk2	-1.79243	0.00600453	0.0783052	chr6:38697840-38876190		626.037	1122.43	-0.842307	174092	Non-regulated	eCLIP Peak	135527	430	Non-regulated
Sfswap	-1.79214	0.00234066	0.0446806	chr5:129501231-129571384		466.045	835.921	-0.842898	66851	Non-regulated	No eCLIP peak	136104	431	Non-regulated
Nefh	-1.79178	0.000540119	0.0185653	chr11:4938758-4948064		5837.97	10461.2	-0.841504	5317	Non-regulated	No eCLIP peak	134120	432	Non-regulated
Epb41l1	-1.79174	7.38521e-05	0.0055484	chr2:156420908-156543212		8275.37	14828	-0.841428	115816	Downregulated	eCLIP Peak	134348	433	Downregulated with peak
Tshz1	-1.79059	0.000561908	0.0189947	chr18:84011627-84087708		2760.55	4943.07	-0.840455	69122	Non-regulated	eCLIP Peak	135320	434	Non-regulated
Bdp1	-1.78912	0.0757323	0.356422	chr13:100017994-100104071		65.1377	115.855	-0.830754	76156	Non-regulated	No eCLIP peak	145029	435	Non-regulated
Gan	-1.7885	0.0154205	0.139062	chr8:117157981-117205834		119.953	214.755	-0.840224	44400	Non-regulated	No eCLIP peak	136598	436	Non-regulated
Ppp1r12a	-1.78815	7.90246e-05	0.00584085	chr10:108162098-108279985		1023.38	1830.14	-0.838608	111773	Downregulated	No eCLIP peak	136173	437	Downregulated without peak
Tmem131	-1.78765	0.000292869	0.012593	chr1:36792191-36939528		907.942	1623.16	-0.838132	140931	Non-regulated	No eCLIP peak	135911	438	Non-regulated
Rph3a	-1.78389	2.58359e-05	0.00291152	chr5:120940502-121010092		3469.94	6190.52	-0.835151	65486	Downregulated	No eCLIP peak	138389	439	Downregulated without peak
Zfp408	-1.78366	0.00113179	0.0291056	chr2:91643688-91649792		392.462	699.898	-0.83459	2642	Non-regulated	No eCLIP peak	137970	440	Non-regulated
Galnt10	-1.78348	0.00311307	0.0530806	chr11:57645442-57787498		78.3876	139.285	-0.829345	137358	Non-regulated	eCLIP Peak	145286	441	Non-regulated
Rapgef1	-1.78291	0.000200748	0.0100905	chr2:29619718-29740363		641.921	1144.27	-0.833954	114807	Non-regulated	eCLIP Peak	141150	442	Non-regulated
Camk4	-1.78119	0.160186	0.549225	chr18:32939041-33195767		964.995	1718.87	-0.832869	254430	Non-regulated	eCLIP Peak	141080	443	Non-regulated
Epb41l4b	-1.78084	0.014636	0.134486	chr4:56991988-57143652		79.5608	141.722	-0.832939	144720	Non-regulated	eCLIP Peak	140308	444	Non-regulated
Pggt1b	-1.78065	0.00138055	0.0330349	chr18:46238848-46280851		371.345	660.799	-0.831453	38166	Non-regulated	No eCLIP peak	144165	445	Non-regulated
Ephb2	-1.77977	0.00189146	0.0394916	chr4:136647539-136836016		105.14	186.869	-0.829708	177548	Non-regulated	eCLIP Peak	145466	446	Non-regulated
Crcp	-1.77938	0.000851392	0.024683	chr5:130029306-130060791		858.002	1526.99	-0.83164	30008	Non-regulated	No eCLIP peak	142485	447	Non-regulated
Slc6a1	-1.7793	0.000144498	0.00832023	chr6:114282635-114317524		496.807	884.136	-0.831581	30596	Downregulated	No eCLIP peak	142831	448	Downregulated without peak
Klk1b22	-1.77826	0.65341	0.905642	chr7:44112673-44116922		61.7373	109.731	-0.829752	3395	Non-regulated	No eCLIP peak	144691	449	Non-regulated
Nbeal2	-1.77655	0.00273842	0.0492634	chr9:110624789-110654161		347.354	616.851	-0.828516	20591	Non-regulated	eCLIP Peak	142941	450	Non-regulated
Olfr281	-1.77653	0.0498675	0.2795	chr15:98456285-98457343		39.5413	70.5571	-0.835428	3273	Non-regulated	No eCLIP peak	136095	451	Non-regulated
Peg10	-1.77639	0.00751204	0.089209	chr6:4747306-4760514		208.497	370.317	-0.828737	6545	Non-regulated	No eCLIP peak	142436	452	Non-regulated
Slc1a2	-1.77594	0.000814214	0.0240559	chr2:102658662-102790784		443.479	787.438	-0.8283	120531	Non-regulated	No eCLIP peak	147003	453	Non-regulated
Nhsl2	-1.77588	2.27447e-05	0.00271167	chrX:101849385-102092055		804.619	1429.19	-0.828826	229700	Downregulated	eCLIP Peak	144695	454	Downregulated with peak
Slc8a1	-1.77445	2.60568e-06	0.000662974	chr17:81266210-81738393		1856.22	3293.9	-0.827433	349436	Downregulated	eCLIP Peak	145852	455	Downregulated with peak
Optc	-1.77338	0.281063	0.711165	chr1:133897196-133908000		36.7909	65.4659	-0.831397	9185	Non-regulated	No eCLIP peak	144158	456	Non-regulated
Alk	-1.77318	0.000621142	0.0203737	chr17:71868988-72604629		2339.64	4148.49	-0.826303	729402	Non-regulated	eCLIP Peak	142356	457	Non-regulated
Slc1a3	-1.77214	0.00267967	0.0486504	chr15:8634124-8710807		222.198	394.12	-0.826788	72478	Non-regulated	eCLIP Peak	142802	458	Non-regulated
Sobp	-1.77201	5.66025e-06	0.00106312	chr10:43002501-43174530		1843.17	3266.87	-0.825716	167051	Downregulated	eCLIP Peak	135224	459	Downregulated with peak
A930033H14Rik	-1.772	1.29474e-05	0.00192572	chr10:69209762-69213099		195.104	345.166	-0.823051	368	Downregulated	No eCLIP peak	138112	460	Downregulated without peak
Pnmt	-1.77171	0.494986	0.845039	chr11:98386602-98388196		122.332	216.783	-0.825446	578	Non-regulated	No eCLIP peak	137049	461	Non-regulated
Evpl	-1.77	0.000786237	0.0235826	chr11:116220559-116238092		190.331	336.989	-0.824191	11135	Non-regulated	No eCLIP peak	137517	462	Non-regulated
Erich3	-1.76934	0.00818419	0.0940588	chr3:154711132-154749012		110.53	196.18	-0.827735	95652	Non-regulated	No eCLIP peak	146692	463	Non-regulated
Zfp69	-1.76918	0.133847	0.495884	chr4:120930137-120951701		17.5954	31.4246	-0.836695	19201	Non-regulated	No eCLIP peak	134970	464	Non-regulated
Dock9	-1.76817	0.00154791	0.0350377	chr14:121538367-121797734		6027.4	10657.7	-0.822289	247936	Non-regulated	eCLIP Peak	138884	465	Non-regulated
Ppfia1	-1.76546	5.99867e-05	0.00473205	chr7:144476755-144553729		722.988	1276.27	-0.819893	71791	Downregulated	eCLIP Peak	136146	466	Downregulated with peak
Ncam1	-1.7638	1.56761e-05	0.00211568	chr9:49502129-49799393		3752.99	6619.97	-0.818786	290740	Downregulated	eCLIP Peak	137261	467	Downregulated with peak
Cd74	-1.76312	0.0855451	0.382349	chr18:60803848-60812651		21.0622	36.6263	-0.798228	7581	Non-regulated	No eCLIP peak	146497	468	Non-regulated
Dcdc2a	-1.76261	0.0833418	0.376893	chr13:25056004-25210706		100.446	177.32	-0.819939	147820	Non-regulated	No eCLIP peak	136558	469	Non-regulated
Ddx46	-1.76249	5.70307e-05	0.00455581	chr13:55634999-55681267		573.316	1009.99	-0.81694	40566	Downregulated	eCLIP Peak	134521	470	Downregulated with peak
Myo10	-1.76142	0.00609108	0.0789963	chr15:25622541-25813671		627.971	1106.61	-0.81737	183024	Non-regulated	eCLIP Peak	135330	471	Non-regulated
Cacna1d	-1.76092	0.00086183	0.0248122	chr14:30039946-30491457		557.755	981.897	-0.81594	442528	Non-regulated	eCLIP Peak	134240	472	Non-regulated
Tceanc2	-1.76013	6.798e-05	0.00518126	chr4:107134162-107178366		1068.41	1881.4	-0.816343	37962	Downregulated	No eCLIP peak	134141	473	Downregulated without peak
Scaper	-1.7589	0.000969495	0.0264403	chr9:55549879-55938122		499.096	877.666	-0.814355	382992	Non-regulated	eCLIP Peak	136758	474	Non-regulated
Usp36	-1.75848	0.00396987	0.0610158	chr11:118259652-118290244		291.699	513.301	-0.815328	24983	Non-regulated	No eCLIP peak	130270	475	Non-regulated
Caskin2	-1.75379	0.0210998	0.167568	chr11:115798994-115813630		88.7358	155.863	-0.81269	9519	Non-regulated	eCLIP Peak	136682	476	Non-regulated
Gapdh	-1.75295	0.323184	0.750602	chr6:125161715-125166469		32033.1	56151.7	-0.809767	3342	Non-regulated	eCLIP Peak	137849	477	Non-regulated
Casp6	-1.7527	0.149545	0.527469	chr3:129901415-129914112		32.5005	56.9201	-0.808478	11223	Non-regulated	No eCLIP peak	138561	478	Non-regulated
Egr1	-1.75253	0.20597	0.623543	chr18:34859823-34864981		3091.03	5417.14	-0.809444	678	Non-regulated	No eCLIP peak	138405	479	Non-regulated
Map1b	-1.75083	0.00117566	0.0298207	chr13:99421446-99516602		65940.3	115451	-0.808048	83287	Non-regulated	eCLIP Peak	139755	480	Non-regulated
Adgrl1	-1.74916	9.05103e-06	0.00151913	chr8:83900098-83941953		3090.65	5406.18	-0.806697	33669	Downregulated	No eCLIP peak	134916	481	Downregulated without peak
Chrm3	-1.74907	0.25784	0.690513	chr13:9876613-10360848		208.743	365.256	-0.807183	481023	Non-regulated	No eCLIP peak	139654	482	Non-regulated
Cplx2	-1.7487	0.0669647	0.332129	chr13:54302556-54383917		923.493	1614.89	-0.806262	7641	Non-regulated	No eCLIP peak	134602	483	Non-regulated
Myo18a	-1.74812	0.000110965	0.00718972	chr11:77763299-77865988		2726.61	4767.53	-0.806131	95222	Downregulated	eCLIP Peak	135082	484	Downregulated with peak
Mast4	-1.74783	0.000442736	0.0164161	chr13:102732488-103334493		2815.99	4922.28	-0.805681	591334	Non-regulated	eCLIP Peak	143337	485	Non-regulated
Numa1	-1.74761	0.00183068	0.0387166	chr7:101934110-102014958		1066.77	1864.9	-0.805844	62717	Non-regulated	No eCLIP peak	134660	486	Non-regulated
Lcorl	-1.74749	0.00668699	0.0834988	chr5:45697184-45857540		54.0096	94.6508	-0.809398	154727	Non-regulated	eCLIP Peak	138955	487	Non-regulated
Tnrc18	-1.74692	0.000708316	0.022046	chr5:142724603-142817662		686.883	1200.83	-0.8059	54521	Non-regulated	eCLIP Peak	134503	488	Non-regulated
Fat1	-1.7467	0.000934211	0.0258807	chr8:44950208-45052257		295.592	515.941	-0.8036	101997	Non-regulated	eCLIP Peak	142832	489	Non-regulated
Tut7	-1.74611	0.00270813	0.0488858	chr13:59771876-59823147		737.449	1287.61	-0.804081	45718	Non-regulated	No eCLIP peak	137616	490	Non-regulated
Secisbp2l	-1.74606	0.0037559	0.059044	chr2:125736986-125782871		678.14	1183.79	-0.80376	39088	Non-regulated	No eCLIP peak	142033	491	Non-regulated
Mrtfb	-1.74571	0.00047307	0.0170562	chr16:13256481-13417529		817.442	1427.27	-0.804074	152768	Non-regulated	eCLIP Peak	143394	492	Non-regulated
Gpnmb	-1.745	0.000310176	0.0130497	chr6:49036518-49070929		834.394	1454.9	-0.802117	31823	Non-regulated	No eCLIP peak	141842	493	Non-regulated
Zfp638	-1.74348	0.0140835	0.131516	chr6:83914353-83986869		480.986	838.449	-0.801728	75490	Non-regulated	No eCLIP peak	142035	494	Non-regulated
Mtus2	-1.74233	0.000509365	0.0179581	chr5:147957318-148316065		386.198	673.006	-0.801279	351203	Non-regulated	eCLIP Peak	152165	495	Non-regulated
Tenm4	-1.74092	0.00012979	0.00780644	chr7:96171240-96911090		1182.75	2059.16	-0.79991	726303	Downregulated	eCLIP Peak	149316	496	Downregulated with peak
Usp54	-1.74064	0.0023548	0.0448151	chr14:20548912-20618355		655.403	1140.99	-0.799834	85572	Non-regulated	No eCLIP peak	143665	497	Non-regulated
Kmt2b	-1.74012	2.64673e-05	0.00292364	chr7:30568855-30588726		1356.16	2360.42	-0.799518	11415	Downregulated	eCLIP Peak	143371	498	Downregulated with peak
Nfasc	-1.73832	0.0124503	0.122233	chr1:132564691-132741800		371.103	645.394	-0.798361	167329	Non-regulated	eCLIP Peak	143564	499	Non-regulated
Stat2	-1.73778	0.000162448	0.00897705	chr10:128270498-128292853		447.255	777.796	-0.798294	17880	Downregulated	eCLIP Peak	142885	500	Downregulated with peak
Setx	-1.73745	0.000906819	0.0254495	chr2:29124991-29182471		1259.82	2188.94	-0.797019	46510	Non-regulated	No eCLIP peak	146820	501	Non-regulated
Clasp1	-1.73719	0.00215418	0.0426438	chr1:118389056-118609445		1077.06	1871.25	-0.796903	212530	Non-regulated	eCLIP Peak	147702	502	Non-regulated
Stac2	-1.73695	0.00265892	0.0484128	chr11:98036624-98053463		670.684	1165.16	-0.796825	13790	Non-regulated	No eCLIP peak	146550	503	Non-regulated
Sphkap	-1.73681	0.00202141	0.0409841	chr1:83255442-83408200		665.754	1156.69	-0.796938	145908	Non-regulated	No eCLIP peak	146415	504	Non-regulated
Carmil3	-1.73638	0.00189367	0.0394916	chr14:55490649-55508272		284.729	494.627	-0.796755	12535	Non-regulated	No eCLIP peak	147219	505	Non-regulated
Lrrc75a	-1.73635	0.0380855	0.237895	chr11:62604886-62648523		236.307	410.271	-0.795916	41656	Non-regulated	eCLIP Peak	151391	506	Non-regulated
Dnmt3a	-1.73614	0.000661404	0.0210808	chr12:3806007-3914443		2875.35	4992.34	-0.795975	97729	Non-regulated	eCLIP Peak	151806	507	Non-regulated
Wipi1	-1.73591	0.00206572	0.0415434	chr11:109573326-109611433		97.7867	169.387	-0.79261	36052	Non-regulated	No eCLIP peak	155982	508	Non-regulated
Sulf2	-1.7354	2.86991e-05	0.00300854	chr2:166073089-166155683		805.011	1396.68	-0.794923	77995	Downregulated	No eCLIP peak	151220	509	Downregulated without peak
Nol8	-1.73474	0.00374207	0.0588811	chr13:49653077-49679016		179.913	311.876	-0.793673	21112	Non-regulated	No eCLIP peak	152492	510	Non-regulated
Vps13c	-1.7334	0.0480589	0.27348	chr9:67840351-67997744		1500.75	2601.16	-0.793475	143716	Non-regulated	eCLIP Peak	154876	511	Non-regulated
Ccar1	-1.73245	0.00482283	0.0677558	chr10:62743928-62792368		573.749	994.11	-0.792986	43952	Non-regulated	eCLIP Peak	155225	512	Non-regulated
Pde4dip	-1.73192	0.000231501	0.0111184	chr3:97689827-97888716		3699.3	6407.11	-0.792421	190620	Non-regulated	eCLIP Peak	159399	513	Non-regulated
Gm36608	-1.73128	0.287139	0.718849	chr19:3689684-3708170		18.9991	32.8564	-0.790248	17920	Non-regulated	No eCLIP peak	155157	514	Non-regulated
Hdc	-1.73099	0.308822	0.744992	chr2:126593662-126618680		82.1799	142.406	-0.793155	22620	Non-regulated	No eCLIP peak	154535	515	Non-regulated
Ktn1	-1.73049	0.00239741	0.045271	chr14:47648448-47736564		443.538	767.479	-0.79107	83502	Non-regulated	No eCLIP peak	157645	516	Non-regulated
Rorb	-1.73036	0.0792341	0.36568	chr19:18930609-19111197		22.132	38.1421	-0.78525	171299	Non-regulated	No eCLIP peak	155576	517	Non-regulated
Pcyt1b	-1.73017	0.000904148	0.0254495	chrX:93654862-93749948		311.162	538.066	-0.790117	90222	Non-regulated	eCLIP Peak	155752	518	Non-regulated
Cdh4	-1.72923	0.00464628	0.0662788	chr2:179442431-179899375		647.916	1120.76	-0.790596	450555	Non-regulated	eCLIP Peak	156958	519	Non-regulated
Zfp217	-1.72889	0.0469684	0.269707	chr2:170108643-170131754		62.7402	108.416	-0.78912	28363	Non-regulated	No eCLIP peak	154388	520	Non-regulated
Jmjd1c	-1.72849	0.0600862	0.310864	chr10:67096125-67256326		1610.81	2784.16	-0.789461	120687	Non-regulated	No eCLIP peak	155316	521	Non-regulated
Rbm41	-1.726	0.117561	0.460697	chrX:139889511-139998595		75.221	129.569	-0.784517	106856	Non-regulated	eCLIP Peak	155060	522	Non-regulated
Lifr	-1.7249	0.00450298	0.0652375	chr15:7129558-7197489		196.414	338.98	-0.787299	73376	Non-regulated	eCLIP Peak	155377	523	Non-regulated
Slx4	-1.72486	0.00109892	0.0286378	chr16:3979109-4001682		412.334	711.618	-0.787289	16852	Non-regulated	No eCLIP peak	154712	524	Non-regulated
Ptgis	-1.72479	0.0441927	0.260306	chr2:167191805-167240605		36.795	63.5255	-0.787828	47074	Non-regulated	No eCLIP peak	154473	525	Non-regulated
Prpf4b	-1.72284	3.73517e-05	0.00341706	chr13:34875503-34906064		1299.45	2238.63	-0.784721	22919	Downregulated	No eCLIP peak	154731	526	Downregulated without peak
Ice1	-1.72153	0.00401669	0.0614956	chr13:70588689-70637638		299.611	515.338	-0.782429	41271	Non-regulated	No eCLIP peak	134974	527	Non-regulated
Lrp1b	-1.721	0.00101258	0.0271691	chr2:40595246-42653598		647.198	1113.74	-0.783134	2042083	Non-regulated	eCLIP Peak	154196	528	Non-regulated
Rock2	-1.71996	0.019375	0.159163	chr12:16894978-16990087		193.757	332.698	-0.779966	85285	Non-regulated	No eCLIP peak	131159	529	Non-regulated
Sptan1	-1.7197	0.00106304	0.028046	chr2:29965560-30031451		13326.4	22917.6	-0.782173	57934	Non-regulated	No eCLIP peak	132335	530	Non-regulated
Ccdc39	-1.71964	0.0307963	0.210381	chr3:33812361-33844312		59.1996	101.766	-0.781597	28334	Non-regulated	No eCLIP peak	132327	531	Non-regulated
Csgalnact1	-1.71894	0.0010778	0.0283172	chr8:68356781-68735146		454.548	781.794	-0.782356	374423	Non-regulated	eCLIP Peak	135072	532	Non-regulated
Gm15270	-1.71886	0.00695657	0.0850088	chr10:24331688-24595813		768.233	1319.1	-0.779938	45903	Non-regulated	eCLIP Peak	132069	533	Non-regulated
Dlx1	-1.71819	0.00952419	0.103416	chr2:71529445-71533980		168.283	289.564	-0.782993	1757	Non-regulated	No eCLIP peak	134215	534	Non-regulated
Stx2	-1.71739	0.0763738	0.358131	chr5:128984557-129008574		57.1722	98.417	-0.783593	21079	Non-regulated	No eCLIP peak	154245	535	Non-regulated
G530011O06Rik	-1.717	0.435185	0.82369	chrX:169974401-169978918		44.9129	77.1216	-0.780006	1495	Non-regulated	No eCLIP peak	129345	536	Non-regulated
Gnal	-1.71696	0.000562144	0.0189947	chr18:67088280-67226792		6992.57	12006	-0.779864	132841	Non-regulated	No eCLIP peak	132127	537	Non-regulated
Ccdc66	-1.71666	0.00839669	0.0958225	chr14:27481092-27508509		298.969	512.521	-0.777615	23109	Non-regulated	No eCLIP peak	128995	538	Non-regulated
Trerf1	-1.71503	0.000930333	0.0258186	chr17:47140871-47362325		247.105	424.69	-0.781288	213972	Non-regulated	eCLIP Peak	132717	539	Non-regulated
Chl1	-1.71486	0.131075	0.490098	chr6:103510876-103750202		345.673	592.911	-0.778408	234998	Non-regulated	No eCLIP peak	130950	540	Non-regulated
Gabbr2	-1.71304	0.0103191	0.108827	chr4:46662318-46991714		340.146	582.91	-0.777117	323819	Non-regulated	eCLIP Peak	128827	541	Non-regulated
L1cam	-1.71257	0.00131638	0.032148	chrX:73853778-73880834		1779.88	3048.47	-0.776306	29822	Non-regulated	No eCLIP peak	125963	542	Non-regulated
Adamts2	-1.71195	0.00931773	0.102198	chr11:50602085-50807573		95.1078	163.446	-0.781176	198224	Non-regulated	No eCLIP peak	130769	543	Non-regulated
Wdfy3	-1.71121	0.00178615	0.0380299	chr5:101832953-102069922		5217.45	8928.41	-0.775058	222692	Non-regulated	eCLIP Peak	125831	544	Non-regulated
Kif26b	-1.71067	0.0027016	0.0488637	chr1:178529124-178932856		1442.74	2468.69	-0.774934	396327	Non-regulated	eCLIP Peak	123639	545	Non-regulated
Nfatc3	-1.71045	0.00859275	0.0972981	chr8:106058818-106130537		232.774	398.271	-0.774819	64921	Non-regulated	No eCLIP peak	126651	546	Non-regulated
Zfp618	-1.71043	0.0214158	0.16915	chr4:62965567-63139706		322.345	551.246	-0.77409	165310	Non-regulated	eCLIP Peak	126537	547	Non-regulated
Crtc3	-1.70945	6.49805e-05	0.00502229	chr7:80586632-80688878		474.61	811.13	-0.773191	97136	Downregulated	eCLIP Peak	126167	548	Downregulated with peak
Kif21b	-1.70875	0.00300834	0.0520709	chr1:136131390-136178001		452.867	774.422	-0.774032	37495	Non-regulated	eCLIP Peak	125453	549	Non-regulated
Chd5	-1.70813	0.000112485	0.00724292	chr4:152338650-152390194		1983.55	3388.91	-0.772737	42058	Downregulated	eCLIP Peak	125835	550	Downregulated with peak
Setd2	-1.70778	0.00477823	0.0673693	chr9:110532597-110618633		343.38	586.09	-0.771316	77687	Non-regulated	No eCLIP peak	128428	551	Non-regulated
Birc6	-1.70692	0.000923213	0.0256888	chr17:74528293-74703773		1541.58	2631.35	-0.771397	159294	Non-regulated	eCLIP Peak	128378	552	Non-regulated
Smarca4	-1.70687	0.00186318	0.0391938	chr9:21616169-21704230		1832.5	3128.73	-0.771763	81686	Non-regulated	No eCLIP peak	128668	553	Non-regulated
Kcnj10	-1.70543	0.0126866	0.123783	chr1:172341207-172374085		97.9773	166.868	-0.768192	27469	Non-regulated	No eCLIP peak	123200	554	Non-regulated
Jakmip3	-1.70498	0.0313625	0.212442	chr7:138940728-139083976		128.256	218.591	-0.769214	89041	Non-regulated	eCLIP Peak	123602	555	Non-regulated
Camk2a	-1.70479	0.194964	0.605656	chr18:60925631-60988152		7173.12	12228.7	-0.769604	57565	Non-regulated	No eCLIP peak	127840	556	Non-regulated
Mdc1	-1.70431	0.0139548	0.13089	chr17:35841498-35859669		377.576	643.383	-0.768912	10821	Non-regulated	No eCLIP peak	122932	557	Non-regulated
Agap1	-1.70418	0.000667722	0.0211752	chr1:89454805-89897617		2124.68	3621.32	-0.769274	430891	Non-regulated	eCLIP Peak	127809	558	Non-regulated
Scaf11	-1.70346	0.00143154	0.0337308	chr15:96411698-96460843		1823.59	3106.54	-0.768528	41422	Non-regulated	eCLIP Peak	123111	559	Non-regulated
Stbd1	-1.70278	0.0660952	0.329605	chr5:92603039-92606579		106.628	181.936	-0.770851	1544	Non-regulated	No eCLIP peak	127785	560	Non-regulated
Dcn	-1.70195	0.0230773	0.177087	chr10:97479500-97518155		35.0768	59.2499	-0.756295	36777	Non-regulated	No eCLIP peak	145630	561	Non-regulated
Tiam1	-1.70185	2.03116e-05	0.0025433	chr16:89787111-90143815		1261.33	2146.67	-0.76715	351456	Downregulated	eCLIP Peak	122924	562	Downregulated with peak
Slc32a1	-1.70035	0.000796925	0.0236933	chr2:158610758-158615764		254.958	432.967	-0.763997	2185	Non-regulated	No eCLIP peak	141324	563	Non-regulated
Bicra	-1.69976	0.000851865	0.024683	chr7:15970672-15999495		155.793	264.873	-0.765673	71275	Non-regulated	No eCLIP peak	125600	564	Non-regulated
Mapkbp1	-1.6997	0.000497697	0.017745	chr2:119972699-120027403		365.788	621.958	-0.76581	47768	Non-regulated	eCLIP Peak	123933	565	Non-regulated
Brpf1	-1.69969	0.000190126	0.00985094	chr6:113307136-113324862		924.626	1571.84	-0.765516	12948	Downregulated	No eCLIP peak	126976	566	Downregulated without peak
Jarid2	-1.69954	0.00307337	0.052705	chr13:44730774-44921643		1233.27	2096.01	-0.765154	184376	Non-regulated	eCLIP Peak	130136	567	Non-regulated
Igf2r	-1.69923	0.00243623	0.0455408	chr17:12682406-12769706		223.905	380.642	-0.765548	78372	Non-regulated	eCLIP Peak	125445	568	Non-regulated
Nsd1	-1.6991	0.00377959	0.0591925	chr13:55209781-55318325		5788.15	9834.56	-0.764757	95760	Non-regulated	No eCLIP peak	129612	569	Non-regulated
Sgcd	-1.69844	0.0207748	0.166125	chr11:46971079-47578975		442.619	751.258	-0.763243	680263	Non-regulated	eCLIP Peak	142589	570	Non-regulated
Golga3	-1.6978	0.00162527	0.0357743	chr5:110176701-110226470		2341.32	3975.39	-0.763773	41638	Non-regulated	eCLIP Peak	141429	571	Non-regulated
Ttc17	-1.69751	0.00212791	0.0424693	chr2:94300766-94406689		290.229	493.048	-0.764536	101333	Non-regulated	eCLIP Peak	140945	572	Non-regulated
Lamc1	-1.69736	0.0249541	0.185807	chr1:153218922-153332786		109.333	185.862	-0.76551	106243	Non-regulated	eCLIP Peak	127675	573	Non-regulated
Sorcs2	-1.69671	0.000314434	0.0131259	chr5:36017178-36398140		1921.13	3260.36	-0.763071	375238	Non-regulated	eCLIP Peak	136885	574	Non-regulated
Enpp3	-1.69619	0.391131	0.793776	chr10:24773491-24836200		203.702	345.192	-0.760934	59567	Non-regulated	No eCLIP peak	133451	575	Non-regulated
Zfp609	-1.69516	0.00269896	0.0488599	chr9:65691584-65827564		766.475	1299.46	-0.761605	127397	Non-regulated	eCLIP Peak	133763	576	Non-regulated
E130102H24Rik	-1.69454	0.0190365	0.157718	chr4:101346524-101356248		52.0102	88.5408	-0.767547	8977	Non-regulated	No eCLIP peak	122964	577	Non-regulated
Trhr2	-1.69441	0.00688064	0.0845121	chr8:122356967-122362828		81.4609	137.656	-0.756888	2440	Non-regulated	No eCLIP peak	143196	578	Non-regulated
Itsn2	-1.69434	0.0411324	0.249594	chr12:4593006-4713950		328.882	556.852	-0.759722	114875	Non-regulated	eCLIP Peak	141616	579	Non-regulated
Pdlim1	-1.69326	0.269314	0.703852	chr19:40221173-40271616		27.7843	47.1781	-0.763846	47873	Non-regulated	No eCLIP peak	141453	580	Non-regulated
Cep164	-1.69317	0.00717316	0.0867542	chr9:45766946-45828663		280.658	475.564	-0.760825	56205	Non-regulated	No eCLIP peak	135166	581	Non-regulated
Mapk4	-1.69196	0.000292935	0.012593	chr18:73928486-74064949		774.526	1310.84	-0.75911	131850	Non-regulated	eCLIP Peak	141843	582	Non-regulated
Zfp646	-1.68918	7.84367e-05	0.00583663	chr7:127876198-127885995		737.013	1245.24	-0.756659	1986	Downregulated	No eCLIP peak	144123	583	Downregulated without peak
Arid1a	-1.6884	0.00191278	0.0396035	chr4:133679008-133756769		1060.52	1791.04	-0.756032	70343	Non-regulated	eCLIP Peak	145935	584	Non-regulated
Camta1	-1.68838	0.00052569	0.0183469	chr4:151059523-151861770		8943.59	15100.2	-0.755643	939140	Non-regulated	eCLIP Peak	145760	585	Non-regulated
Cc2d2a	-1.68828	0.0188089	0.156625	chr5:43662379-43740972		185.368	313.265	-0.756988	73143	Non-regulated	No eCLIP peak	143779	586	Non-regulated
Brd3	-1.68824	0.000618006	0.0203355	chr2:27445583-27507664		403.347	681.48	-0.75665	56078	Non-regulated	No eCLIP peak	145838	587	Non-regulated
Grip1	-1.68616	0.00804141	0.0930454	chr10:119454034-120087260		194.044	327.412	-0.754723	629286	Non-regulated	eCLIP Peak	136790	588	Non-regulated
Zfp335	-1.68596	0.00121207	0.0304505	chr2:164891893-164911750		444.2	749.429	-0.75458	15289	Non-regulated	eCLIP Peak	130911	589	Non-regulated
Zzef1	-1.68526	0.00340965	0.0560514	chr11:72796225-72927120		948.698	1598.92	-0.753081	119745	Non-regulated	eCLIP Peak	131817	590	Non-regulated
Snapc4	-1.68499	0.0102267	0.108141	chr2:26362767-26380653		169.505	286.111	-0.755253	13517	Non-regulated	No eCLIP peak	136570	591	Non-regulated
Rin1	-1.68415	0.437144	0.825671	chr19:5050808-5057071		391.254	658.941	-0.752046	2088	Non-regulated	No eCLIP peak	131524	592	Non-regulated
Stxbp4	-1.68378	0.00109908	0.0286378	chr11:90476495-90638108		844.942	1422.26	-0.751264	155608	Non-regulated	No eCLIP peak	128678	593	Non-regulated
Auts2	-1.68292	5.76041e-06	0.0010747	chr5:131437333-132543345		1616.87	2721.69	-0.751299	1098603	Downregulated	eCLIP Peak	131622	594	Downregulated with peak
Xpnpep3	-1.68285	0.000653024	0.0209275	chr15:81400138-81457482		147.931	249.067	-0.751612	51287	Non-regulated	No eCLIP peak	131708	595	Non-regulated
Scube2	-1.68256	0.00952412	0.103416	chr7:109798720-109865679		627.625	1056.47	-0.751282	63427	Non-regulated	No eCLIP peak	120938	596	Non-regulated
Zfp608	-1.68099	0.012403	0.121941	chr18:54888045-54992592		161.091	270.252	-0.746433	98732	Non-regulated	eCLIP Peak	127903	597	Non-regulated
Mlxip	-1.68046	0.0113525	0.115773	chr5:123394798-123457932		280.695	471.771	-0.749084	55830	Non-regulated	eCLIP Peak	127500	598	Non-regulated
Cdh23	-1.67698	0.00590184	0.0773469	chr10:60302750-60696491		300.676	504.226	-0.745862	382645	Non-regulated	No eCLIP peak	127968	599	Non-regulated
Fnbp4	-1.67681	0.0221382	0.172823	chr2:90745370-90781333		103.476	173.791	-0.748059	30961	Non-regulated	eCLIP Peak	128064	600	Non-regulated
Ehbp1	-1.67477	0.000460186	0.0167988	chr11:22005825-22342294		856.217	1433.82	-0.743814	275922	Non-regulated	No eCLIP peak	125485	601	Non-regulated
Arhgap20	-1.674	0.0842152	0.378872	chr9:51765336-51853855		944.507	1581.07	-0.743266	81344	Non-regulated	No eCLIP peak	123621	602	Non-regulated
Robo1	-1.6734	0.00371391	0.0586237	chr16:72663149-73047489		1834.81	3070.27	-0.742735	475795	Non-regulated	eCLIP Peak	123412	603	Non-regulated
Fstl1	-1.6708	0.33019	0.750602	chr16:37777037-37836493		134.085	224.161	-0.74139	55853	Non-regulated	No eCLIP peak	119240	604	Non-regulated
Lrrc75b	-1.6708	0.0132442	0.126985	chr10:75550125-75560330		196.588	329.262	-0.744059	5605	Non-regulated	No eCLIP peak	125292	605	Non-regulated
Crhr1	-1.67067	0.0238964	0.180719	chr11:104132781-104175522		81.2588	136.124	-0.744326	40209	Non-regulated	eCLIP Peak	124715	606	Non-regulated
Vps13d	-1.66922	0.0112522	0.11518	chr4:144972622-145195010		2649.69	4423.1	-0.739236	206535	Non-regulated	eCLIP Peak	119748	607	Non-regulated
Chaf1a	-1.66912	0.000626992	0.0204805	chr17:56040402-56072289		173.212	289.558	-0.741319	24303	Non-regulated	No eCLIP peak	118784	608	Non-regulated
Map2	-1.66806	0.000689084	0.0216211	chr1:66175313-66442581		3221.66	5373.88	-0.738159	261828	Non-regulated	No eCLIP peak	118007	609	Non-regulated
Thoc2	-1.66776	0.0046823	0.0665634	chrX:41794995-41911954		436.496	728.008	-0.737985	109289	Non-regulated	No eCLIP peak	115925	610	Non-regulated
Rai1	-1.66716	0.000194496	0.00999532	chr11:60105013-60199195		1587.66	2647.52	-0.737745	92362	Downregulated	eCLIP Peak	115552	611	Downregulated with peak
Tmem178b	-1.66603	0.00366945	0.0581546	chr6:39871436-40255146		6652.8	11083.6	-0.736391	381093	Non-regulated	eCLIP Peak	114875	612	Non-regulated
Slc16a2	-1.6656	0.130616	0.489031	chrX:103697414-103821988		98.9279	164.912	-0.737247	120418	Non-regulated	eCLIP Peak	114702	613	Non-regulated
9330159F19Rik	-1.66484	0.00397702	0.0610661	chr10:29211643-29230779		1487.39	2476.26	-0.735385	13493	Non-regulated	No eCLIP peak	115592	614	Non-regulated
Bbs1	-1.66382	0.000257223	0.0117971	chr19:4886898-4906628		289.371	481.552	-0.734771	14149	Non-regulated	No eCLIP peak	118018	615	Non-regulated
Speg	-1.6635	0.136267	0.501371	chr1:75375297-75432270		1188.16	1976.64	-0.734321	46223	Non-regulated	No eCLIP peak	116151	616	Non-regulated
Cdc42bpb	-1.66343	0.000163873	0.00899585	chr12:111292972-111377718		2299.44	3825.39	-0.734324	78029	Downregulated	eCLIP Peak	116875	617	Downregulated with peak
Erc1	-1.66338	0.0308322	0.210535	chr6:119570796-119848150		330.851	550.509	-0.734588	268595	Non-regulated	eCLIP Peak	119445	618	Non-regulated
Cgnl1	-1.66264	0.00424653	0.0631588	chr9:71626509-71771605		1973.25	3281.09	-0.733601	138340	Non-regulated	eCLIP Peak	118593	619	Non-regulated
Atp11a	-1.66216	0.00900586	0.0996349	chr8:12757013-12868728		557.351	926.377	-0.733015	104166	Non-regulated	eCLIP Peak	119689	620	Non-regulated
Zc3h18	-1.66214	0.000770093	0.0232309	chr8:122376609-122417365		1349.09	2243.26	-0.733612	36941	Non-regulated	No eCLIP peak	118623	621	Non-regulated
Cyp2a5	-1.66182	0.518518	0.845039	chr7:26835338-26843530		38.588	64.1381	-0.73303	6211	Non-regulated	No eCLIP peak	119426	622	Non-regulated
Frmpd1	-1.66145	0.0447867	0.26267	chr4:45184906-45286375		40.6223	68.0256	-0.743806	96219	Non-regulated	eCLIP Peak	124108	623	Non-regulated
Pcm1	-1.6612	0.00521571	0.0709732	chr8:41239751-41334086		578.097	960.209	-0.732037	85948	Non-regulated	No eCLIP peak	126274	624	Non-regulated
6820431F20Rik	-1.66021	0.072242	0.346696	chr8:20268286-20297549		1652.54	2743.21	-0.731179	24488	Non-regulated	No eCLIP peak	128055	625	Non-regulated
Crispld2	-1.65778	0.0152106	0.137958	chr8:119992438-120052794		97.2998	161.542	-0.731401	56174	Non-regulated	No eCLIP peak	126372	626	Non-regulated
Cntn2	-1.65776	0.0020457	0.0412723	chr1:132509425-132542943		1881.04	3119.05	-0.729571	23981	Non-regulated	No eCLIP peak	129933	627	Non-regulated
Tbc1d16	-1.65712	3.76515e-05	0.00341706	chr11:119143043-119228500		1602.91	2656.94	-0.729071	78469	Downregulated	eCLIP Peak	130385	628	Downregulated with peak
Dync1h1	-1.65676	9.86472e-06	0.00161281	chr12:110601395-110666947		1816.25	3009.56	-0.72859	51152	Downregulated	No eCLIP peak	130211	629	Downregulated without peak
Prdm2	-1.65674	3.84736e-05	0.00346856	chr4:143107393-143212711		1915.63	3173.69	-0.728341	98011	Downregulated	eCLIP Peak	130188	630	Downregulated with peak
Ripor3	-1.65668	0.0852487	0.381768	chr2:167980164-168010619		85.438	142.1	-0.733958	26956	Non-regulated	No eCLIP peak	117673	631	Non-regulated
Lrrc9	-1.65522	0.00170387	0.0368499	chr12:72441865-72510565		183.856	304.082	-0.725883	67703	Non-regulated	No eCLIP peak	129238	632	Non-regulated
Syt7	-1.65465	0.00047318	0.0170562	chr19:10389023-10453181		8714.13	14419.1	-0.726551	57126	Non-regulated	eCLIP Peak	129278	633	Non-regulated
Zkscan2	-1.65383	0.00260042	0.0477334	chr7:123477747-123500627		284.862	470.978	-0.725398	17235	Non-regulated	No eCLIP peak	128721	634	Non-regulated
Itsn1	-1.65225	0.000645566	0.0207859	chr16:91729370-91920579		4989.76	8244.51	-0.724465	177233	Non-regulated	eCLIP Peak	128407	635	Non-regulated
Cux2	-1.65188	0.000273871	0.0121714	chr5:121860217-122049851		1576.87	2605.6	-0.724556	184702	Non-regulated	eCLIP Peak	129650	636	Non-regulated
Dicer1	-1.65162	0.011681	0.117878	chr12:104687741-104751959		267.279	441.716	-0.724773	54360	Non-regulated	No eCLIP peak	128643	637	Non-regulated
Srcap	-1.65134	0.00130813	0.0320224	chr7:127511982-127561218		184.303	304.331	-0.72356	37548	Non-regulated	No eCLIP peak	132621	638	Non-regulated
Gpam	-1.6511	0.00288849	0.0508028	chr19:55067268-55127238		261.102	430.508	-0.721425	53409	Non-regulated	No eCLIP peak	131909	639	Non-regulated
Kif5b	-1.65106	0.01797	0.152508	chr18:6201005-6241524		562.721	928.933	-0.723155	34490	Non-regulated	No eCLIP peak	133560	640	Non-regulated
Aspdh	-1.65053	0.0234808	0.179051	chr7:44465435-44467751		92.4427	152.57	-0.722837	1351	Non-regulated	No eCLIP peak	133479	641	Non-regulated
Caskin1	-1.65036	0.000338501	0.0137389	chr17:24488599-24508909		934.149	1542.52	-0.723564	13951	Non-regulated	eCLIP Peak	131668	642	Non-regulated
Zfpm1	-1.65015	9.89025e-07	0.000318446	chr8:122282138-122337862		560.561	925.707	-0.723683	51721	Downregulated	eCLIP Peak	126771	643	Downregulated with peak
Kcnma1	-1.64949	0.0144986	0.133898	chr14:23298694-24127601		351.943	580.385	-0.721669	700475	Non-regulated	eCLIP Peak	137472	644	Non-regulated
Fkbp15	-1.64843	0.0120927	0.120294	chr4:62300343-62360596		241.457	397.948	-0.720814	55865	Non-regulated	No eCLIP peak	131810	645	Non-regulated
Mprip	-1.64679	0.000372023	0.0145643	chr11:59662487-59781756		1095.33	1803.45	-0.719385	109648	Non-regulated	eCLIP Peak	131542	646	Non-regulated
Wasf2	-1.64602	0.0136016	0.129117	chr4:133130563-133199751		261.162	429.638	-0.718176	63610	Non-regulated	No eCLIP peak	130777	647	Non-regulated
Uckl1os	-1.6454	0.344089	0.768175	chr2:181578479-181585115		27.4188	45.2631	-0.723172	6198	Non-regulated	No eCLIP peak	133158	648	Non-regulated
Itpr1	-1.64415	0.00026061	0.0118669	chr6:108213094-108551116		5367.5	8825.33	-0.7174	328144	Non-regulated	eCLIP Peak	130269	649	Non-regulated
Srrm2	-1.64283	0.00113882	0.0291723	chr17:23803185-23824741		8422.23	13836.7	-0.716227	12686	Non-regulated	eCLIP Peak	126263	650	Non-regulated
Rb1cc1	-1.64232	0.0055787	0.0741805	chr1:6214660-6276365		1566.1	2571.59	-0.715485	54397	Non-regulated	No eCLIP peak	127611	651	Non-regulated
Baz1b	-1.64178	0.0337589	0.222246	chr5:135187322-135246127		179.407	294.892	-0.716948	52374	Non-regulated	No eCLIP peak	127210	652	Non-regulated
1700112J16Rik	-1.64129	0.102198	0.425949	chr7:67204082-67222459		26.3767	43.7548	-0.730176	16162	Non-regulated	No eCLIP peak	129304	653	Non-regulated
Leng8	-1.64076	0.000683404	0.0215118	chr7:4137048-4148173		471.463	774.157	-0.715482	6024	Non-regulated	eCLIP Peak	127152	654	Non-regulated
Bmp2	-1.64027	0.00359269	0.0575718	chr2:133552158-133562896		138.972	228.207	-0.715549	7172	Non-regulated	No eCLIP peak	127676	655	Non-regulated
Ar	-1.63954	0.120117	0.465467	chrX:98148757-98323218		46.4227	76.2856	-0.71658	164399	Non-regulated	No eCLIP peak	127473	656	Non-regulated
Synpo2l	-1.638	0.000111646	0.00721904	chr14:20658948-20668354		547.701	896.598	-0.711073	4967	Downregulated	No eCLIP peak	132945	657	Downregulated without peak
Slc4a8	-1.63757	0.00595776	0.0778754	chr15:100761746-100823971		1547.36	2534.58	-0.711936	50432	Non-regulated	eCLIP Peak	131887	658	Non-regulated
Vldlr	-1.63747	0.000208759	0.0104063	chr19:27216483-27254231		874.41	1432.37	-0.712026	28904	Non-regulated	No eCLIP peak	131948	659	Non-regulated
Sdc4	-1.637	0.0763955	0.358131	chr2:164424247-164443188		28.6424	47.2821	-0.723143	16482	Non-regulated	No eCLIP peak	133341	660	Non-regulated
Plekho2	-1.63656	0.00110277	0.0286864	chr9:65550573-65580087		174.333	285.798	-0.713147	21291	Non-regulated	No eCLIP peak	127789	661	Non-regulated
9930021J03Rik	-1.63635	0.0158404	0.141594	chr19:29714402-29806011		1305.78	2136.39	-0.710262	83582	Non-regulated	No eCLIP peak	126874	662	Non-regulated
Cnksr2	-1.63633	0.00245126	0.0457675	chrX:157821574-158043323		2134.82	3493.6	-0.710599	216121	Non-regulated	eCLIP Peak	128692	663	Non-regulated
Soga1	-1.63513	0.0249793	0.185807	chr2:157010442-157079265		363.144	594.271	-0.710579	55592	Non-regulated	No eCLIP peak	127019	664	Non-regulated
Xkr4	-1.63506	0.00113456	0.029153	chr1:3214482-3671498		282.815	462.918	-0.710895	453383	Non-regulated	eCLIP Peak	132898	665	Non-regulated
Epha5	-1.63491	0.0121997	0.120825	chr5:84054426-84417383		1008.5	1648.85	-0.709241	354833	Non-regulated	No eCLIP peak	126503	666	Non-regulated
Arhgef12	-1.63483	0.00735763	0.0880739	chr9:42963842-43107246		5047.09	8250.84	-0.709091	131394	Non-regulated	No eCLIP peak	123200	667	Non-regulated
Gigyf1	-1.63461	0.000622995	0.0203843	chr5:137518870-137527934		307.01	502.877	-0.711919	3618	Non-regulated	eCLIP Peak	132294	668	Non-regulated
Lingo2	-1.63393	0.137686	0.504241	chr4:35706647-36951746		385.205	629.684	-0.709	1240456	Non-regulated	eCLIP Peak	122029	669	Non-regulated
Dgkh	-1.63384	0.00655953	0.0827256	chr14:78559350-78732729		490.553	801.234	-0.707815	158770	Non-regulated	No eCLIP peak	109189	670	Non-regulated
Zc3h7b	-1.63373	0.0015781	0.0352909	chr15:81745055-81796260		881.815	1440.34	-0.707865	45464	Non-regulated	eCLIP Peak	109352	671	Non-regulated
Pcnx2	-1.63357	0.000233142	0.0111526	chr8:125751509-125898317		1741.83	2845.74	-0.708199	139574	Non-regulated	eCLIP Peak	109922	672	Non-regulated
Dlg5	-1.63272	0.000632755	0.0205834	chr14:24133955-24245921		542.431	885.591	-0.707202	104184	Non-regulated	eCLIP Peak	107773	673	Non-regulated
Tcerg1	-1.63209	0.000538008	0.0185331	chr18:42511487-42575785		1394.21	2275.72	-0.706874	59890	Non-regulated	No eCLIP peak	107195	674	Non-regulated
Smg6	-1.63135	0.000480607	0.0172723	chr11:74925854-75164444		956.549	1560.7	-0.706285	232778	Non-regulated	eCLIP Peak	106212	675	Non-regulated
Scn2a	-1.63099	0.00128637	0.0317358	chr2:65620758-65767447		7152.19	11665	-0.70573	137742	Non-regulated	eCLIP Peak	98463	676	Non-regulated
Tanc2	-1.63069	9.31381e-05	0.00645908	chr11:105589983-105929304		3965.39	6466.52	-0.705526	327459	Downregulated	eCLIP Peak	98144.3	677	Downregulated with peak
Csf1	-1.63025	0.0123888	0.121895	chr3:107741049-107760470		71.8151	117.322	-0.708114	15246	Non-regulated	No eCLIP peak	108771	678	Non-regulated
Kcnh3	-1.62958	0.0329654	0.219261	chr15:99224592-99242797		378.524	617.09	-0.705094	14259	Non-regulated	eCLIP Peak	111026	679	Non-regulated
Ep400	-1.62953	0.01469	0.134668	chr5:110664373-110770717		192.663	314.371	-0.706389	95925	Non-regulated	eCLIP Peak	107128	680	Non-regulated
2610005L07Rik	-1.62895	0.00973526	0.104878	chr8:20382582-20424816		1301.13	2119.32	-0.703841	35024	Non-regulated	No eCLIP peak	110714	681	Non-regulated
Prdm15	-1.62823	0.0603281	0.311503	chr16:97791467-97851854		56.9641	92.4782	-0.699059	54137	Non-regulated	eCLIP Peak	120289	682	Non-regulated
Diaph2	-1.62791	0.0173503	0.149211	chrX:129749742-130465831		124.872	203.726	-0.706175	707651	Non-regulated	No eCLIP peak	105000	683	Non-regulated
Btbd8	-1.62744	0.00381986	0.0594926	chr5:107437930-107512560		953.035	1551.29	-0.70287	67569	Non-regulated	No eCLIP peak	111006	684	Non-regulated
Lrch3	-1.627	0.0196373	0.160296	chr16:32914100-33016029		183.846	299.553	-0.704311	96012	Non-regulated	eCLIP Peak	111717	685	Non-regulated
Nxpe4	-1.62664	0.0558392	0.298032	chr9:48162014-48400025		44.311	72.4976	-0.710269	232978	Non-regulated	No eCLIP peak	127275	686	Non-regulated
Mal	-1.62648	0.00225977	0.043826	chr2:127633228-127656697		146.512	238.196	-0.701137	20692	Non-regulated	No eCLIP peak	112706	687	Non-regulated
Sclt1	-1.62638	0.0235065	0.179084	chr3:41626705-41742514		136.769	222.13	-0.699661	112790	Non-regulated	No eCLIP peak	106297	688	Non-regulated
Cfap99	-1.62601	0.0117153	0.117978	chr5:34288665-34328431		129.281	209.993	-0.699834	36605	Non-regulated	No eCLIP peak	106153	689	Non-regulated
Rnf168	-1.6258	0.00557479	0.0741598	chr16:32277457-32301442		1298.1	2110.11	-0.700913	19514	Non-regulated	No eCLIP peak	114288	690	Non-regulated
Ttbk2	-1.6258	0.0148065	0.135343	chr2:120732816-120850604		822.925	1337.92	-0.70116	106863	Non-regulated	No eCLIP peak	111120	691	Non-regulated
Ankhd1	-1.62566	0.000233944	0.0111677	chr18:36560603-36658908		965.305	1569.4	-0.70116	90098	Non-regulated	No eCLIP peak	110877	692	Non-regulated
Mrc2	-1.62563	0.00369515	0.0584152	chr11:105292642-105351145		280.065	455.691	-0.702296	52699	Non-regulated	No eCLIP peak	110359	693	Non-regulated
Cdk12	-1.62561	0.000685952	0.0215583	chr11:98203305-98280885		965.47	1569.63	-0.701125	42594	Non-regulated	No eCLIP peak	113547	694	Non-regulated
Dlgap1	-1.62482	0.00453076	0.0654895	chr17:69969073-70821413		9839.07	15986.9	-0.700293	845168	Non-regulated	eCLIP Peak	114155	695	Non-regulated
Dido1	-1.62415	0.00153345	0.0348244	chr2:180657963-180710047		383.217	623.144	-0.701403	35664	Non-regulated	No eCLIP peak	110237	696	Non-regulated
Cdh6	-1.62331	0.0249943	0.185832	chr15:13028701-13173677		378.5	614.048	-0.698057	136808	Non-regulated	No eCLIP peak	123068	697	Non-regulated
Lyst	-1.62285	0.0536729	0.291196	chr13:13590394-13778800		52.3555	85.2921	-0.704071	175226	Non-regulated	eCLIP Peak	112037	698	Non-regulated
Syngap1	-1.62228	0.000249414	0.0115741	chr17:26941250-26972434		5011.73	8130.9	-0.698105	25171	Non-regulated	eCLIP Peak	119028	699	Non-regulated
Crybg3	-1.6212	0.0234198	0.178802	chr16:59490775-59601047		218.798	355.082	-0.698551	98438	Non-regulated	No eCLIP peak	119895	700	Non-regulated
Dclk3	-1.62119	0.258918	0.691494	chr9:111439081-111489611		383.94	622.556	-0.697321	47033	Non-regulated	No eCLIP peak	121924	701	Non-regulated
Lrrcc1	-1.61953	0.0645088	0.324488	chr3:14533786-14572657		77.1867	125.496	-0.701218	35512	Non-regulated	No eCLIP peak	110985	702	Non-regulated
Grip2	-1.6194	0.000199505	0.010075	chr6:91761509-91807393		906.074	1468.06	-0.69621	60222	Non-regulated	eCLIP Peak	121721	703	Non-regulated
Trim17	-1.61931	0.0626491	0.318433	chr11:58963781-58973075		82.554	134.077	-0.699649	14750	Non-regulated	No eCLIP peak	105938	704	Non-regulated
Hspa12a	-1.61887	0.00178453	0.0380299	chr19:58795751-58943672		994.86	1610.84	-0.695248	121742	Non-regulated	eCLIP Peak	120820	705	Non-regulated
Mlh3	-1.6185	0.00608818	0.0789911	chr12:85234467-85270600		607.824	984.093	-0.695141	30617	Non-regulated	No eCLIP peak	119729	706	Non-regulated
Scg5	-1.61839	0.103172	0.428352	chr2:113776313-113829092		21583.7	34930.8	-0.694555	51552	Non-regulated	No eCLIP peak	121587	707	Non-regulated
Tub	-1.61804	0.0012011	0.0302117	chr7:108950337-109034459		3221.07	5211.37	-0.69412	71623	Non-regulated	No eCLIP peak	123618	708	Non-regulated
Ildr2	-1.61773	0.12442	0.474664	chr1:166254139-166316832		100.878	163.395	-0.695746	54434	Non-regulated	No eCLIP peak	121231	709	Non-regulated
Alms1	-1.61703	0.0380327	0.237675	chr6:85587531-85702752		65.1453	105.762	-0.699092	105237	Non-regulated	No eCLIP peak	120358	710	Non-regulated
Pde10a	-1.61586	0.0075276	0.0892253	chr17:8525448-8986648		802.002	1295.9	-0.692271	453517	Non-regulated	eCLIP Peak	123587	711	Non-regulated
Epb41l3	-1.61566	0.0017025	0.0368455	chr17:69075677-69289989		9806.32	15843.6	-0.692116	158298	Non-regulated	No eCLIP peak	117603	712	Non-regulated
Srgap1	-1.61565	0.00559407	0.0742909	chr10:121780991-122047317		712.857	1151.83	-0.692239	258538	Non-regulated	eCLIP Peak	119415	713	Non-regulated
Frg2f1	-1.6155	0.000577534	0.0193456	chr4:119530320-119538769		143.003	231.257	-0.693448	6553	Non-regulated	eCLIP Peak	123387	714	Non-regulated
Mavs	-1.61533	0.1409	0.510971	chr2:131234045-131248025		32.6604	53.1104	-0.701453	11001	Non-regulated	No eCLIP peak	110273	715	Non-regulated
Prrc2a	-1.61522	0.000752424	0.0228508	chr17:35149088-35164877		1844.57	2980.11	-0.692087	8934	Non-regulated	eCLIP Peak	117509	716	Non-regulated
Afdn	-1.61508	0.00759719	0.0898507	chr17:13760541-13905795		269.473	435.45	-0.692364	137871	Non-regulated	No eCLIP peak	124885	717	Non-regulated
Kifc2	-1.61389	0.0022477	0.0436731	chr15:76659858-76668196		6089.4	9827.78	-0.690565	4987	Non-regulated	No eCLIP peak	118603	718	Non-regulated
Cmip	-1.61305	2.46625e-05	0.00284014	chr8:117257019-117461503		8971.23	14471.6	-0.689842	199959	Downregulated	eCLIP Peak	120128	719	Downregulated with peak
Spata13	-1.61269	0.0277839	0.198572	chr14:60634243-60764556		108.834	175.534	-0.689629	122840	Non-regulated	No eCLIP peak	118502	720	Non-regulated
Igf2	-1.61244	0.0799409	0.367491	chr7:142650768-142666816		56.0262	89.6477	-0.678165	12411	Non-regulated	No eCLIP peak	105803	721	Non-regulated
Tspo	-1.61149	0.261102	0.694321	chr15:83563573-83574212		25.9934	42.102	-0.69574	9775	Non-regulated	No eCLIP peak	120773	722	Non-regulated
Ncoa1	-1.61041	0.00429413	0.0633942	chr12:4247363-4477182		2345.01	3776.61	-0.687498	222492	Non-regulated	eCLIP Peak	118145	723	Non-regulated
Mn1	-1.61032	0.00155278	0.0350976	chr5:111417300-111457030		408.259	657.402	-0.687291	32732	Non-regulated	No eCLIP peak	117913	724	Non-regulated
Gucy1a1	-1.60916	0.0311237	0.2117	chr3:82092428-82145946		118.498	190.178	-0.682482	48797	Non-regulated	No eCLIP peak	110233	725	Non-regulated
Wdr76	-1.60895	0.0129246	0.124907	chr2:121506723-121544860		77.8746	125.584	-0.689426	33908	Non-regulated	No eCLIP peak	117452	726	Non-regulated
Adgrl3	-1.60884	0.000508155	0.0179355	chr5:81020137-81825133		855.088	1376.21	-0.686561	769271	Non-regulated	eCLIP Peak	117898	727	Non-regulated
Tanc1	-1.60698	0.000134365	0.0079545	chr2:59612042-59846213		1361.53	2188.55	-0.684748	226233	Downregulated	eCLIP Peak	110575	728	Downregulated with peak
Gm15559	-1.60688	0.0400831	0.245711	chr5:110770949-110779260		71.9271	115.394	-0.681963	6052	Non-regulated	No eCLIP peak	110680	729	Non-regulated
Lmtk2	-1.60648	0.000471424	0.0170562	chr5:144100361-144188208		20414.8	32796	-0.683907	79655	Non-regulated	eCLIP Peak	109922	730	Non-regulated
Pcdh19	-1.60556	0.00502692	0.0694796	chrX:133582863-133688993		128.246	206.227	-0.685321	95839	Non-regulated	No eCLIP peak	110497	731	Non-regulated
Taok3	-1.60485	0.00551545	0.0736187	chr5:117120128-117275096		270.217	434.177	-0.684162	150622	Non-regulated	No eCLIP peak	111190	732	Non-regulated
Nfic	-1.60456	0.000200265	0.0100905	chr10:81396191-81431138		634.797	1018.1	-0.681505	53152	Non-regulated	eCLIP Peak	112201	733	Non-regulated
Myo7a	-1.60437	0.00191924	0.0396852	chr7:98051054-98119493		318.13	510.633	-0.68267	60959	Non-regulated	No eCLIP peak	110180	734	Non-regulated
Myt1	-1.60435	0.00840311	0.0958516	chr2:181763332-181827775		162.583	260.523	-0.680232	59139	Non-regulated	No eCLIP peak	110814	735	Non-regulated
Zfp142	-1.60324	0.00281229	0.0500336	chr1:74565128-74588038		1178.29	1888.87	-0.680826	15429	Non-regulated	No eCLIP peak	111740	736	Non-regulated
Map1a	-1.60284	0.0001144	0.00729246	chr2:121289602-121310830		19111.9	30634.3	-0.680674	9408	Downregulated	No eCLIP peak	111726	737	Downregulated without peak
Plvap	-1.60181	0.0618175	0.315834	chr8:71497754-71511769		77.831	124.694	-0.679977	12001	Non-regulated	No eCLIP peak	110884	738	Non-regulated
Vps13b	-1.6018	0.00340787	0.0560514	chr15:35371118-35931229		722.092	1156.84	-0.679932	546313	Non-regulated	No eCLIP peak	111142	739	Non-regulated
Rad54l2	-1.60163	0.0111341	0.114246	chr9:106688082-106789213		759.826	1216.82	-0.679376	91808	Non-regulated	No eCLIP peak	105572	740	Non-regulated
Kif21a	-1.6015	0.00404657	0.0616041	chr15:90933275-91049953		4937.18	7906.94	-0.679433	110234	Non-regulated	No eCLIP peak	106079	741	Non-regulated
Zcchc14	-1.60137	1.46812e-05	0.00205459	chr8:121598718-121651935		2764.74	4427.21	-0.679255	46755	Downregulated	eCLIP Peak	105564	742	Downregulated with peak
Gm2237	-1.60118	0.00116407	0.0296457	chr14:19563801-19585798		100.24	160.136	-0.675835	19246	Non-regulated	No eCLIP peak	109349	743	Non-regulated
Lrrn4cl	-1.59979	0.0285143	0.201645	chr19:8850766-8854586		65.2551	104.108	-0.673911	542	Non-regulated	No eCLIP peak	111374	744	Non-regulated
Ugt8a	-1.5993	0.0244152	0.183277	chr3:125865272-125956653		48.0384	77.1587	-0.683643	69609	Non-regulated	No eCLIP peak	110711	745	Non-regulated
Lama4	-1.59881	0.03827	0.238462	chr10:38965513-39110188		473.85	757.617	-0.677038	138628	Non-regulated	No eCLIP peak	102732	746	Non-regulated
Supt16	-1.59872	0.0416525	0.251686	chr14:52158551-52197241		232.871	372.059	-0.675998	32330	Non-regulated	No eCLIP peak	103082	747	Non-regulated
Atxn1	-1.59868	0.00190757	0.0395975	chr13:45549758-45965010		425.315	680.249	-0.677531	404653	Non-regulated	eCLIP Peak	106361	748	Non-regulated
Phldb1	-1.5984	0.00159227	0.0354727	chr9:44686309-44735198		827.866	1323.49	-0.676873	43430	Non-regulated	eCLIP Peak	101484	749	Non-regulated
Kansl3	-1.59807	0.00193514	0.0399094	chr1:36335730-36369182		2215.67	3540.97	-0.676401	28789	Non-regulated	No eCLIP peak	101735	750	Non-regulated
Ccdc80	-1.59803	0.0312054	0.211982	chr16:45093672-45128077		178.43	285.431	-0.677783	30383	Non-regulated	No eCLIP peak	106347	751	Non-regulated
Osbpl3	-1.59803	0.0551208	0.295746	chr6:50293327-50456354		54.1989	86.874	-0.680661	156065	Non-regulated	eCLIP Peak	112117	752	Non-regulated
Mthfr	-1.59797	0.0139316	0.130842	chr4:148038317-148059562		240.458	384.14	-0.675847	12289	Non-regulated	No eCLIP peak	105429	753	Non-regulated
Heg1	-1.59685	0.00337316	0.0556296	chr16:33684465-33771573		832.185	1328.82	-0.675166	78950	Non-regulated	eCLIP Peak	111551	754	Non-regulated
Dio2	-1.59678	0.00457922	0.0658281	chr12:90724552-90739038		340.705	543.142	-0.672807	8072	Non-regulated	No eCLIP peak	114594	755	Non-regulated
Syn3	-1.59599	0.0571642	0.301078	chr10:86048748-86498898		135.639	216.013	-0.671352	441372	Non-regulated	eCLIP Peak	114448	756	Non-regulated
Daam1	-1.59589	0.000292189	0.012593	chr12:71831068-71992376		778.239	1241.78	-0.674127	155421	Non-regulated	eCLIP Peak	111627	757	Non-regulated
Cd82	-1.59564	0.053263	0.289769	chr2:93419102-93462950		124.634	198.943	-0.674664	42148	Non-regulated	No eCLIP peak	110846	758	Non-regulated
Tshz3	-1.59332	0.00485358	0.0679157	chr7:36698118-36773553		363.368	578.995	-0.672121	70338	Non-regulated	eCLIP Peak	114763	759	Non-regulated
Slf2	-1.59169	0.00617924	0.0794862	chr19:44931119-44983783		108.166	171.488	-0.664854	45789	Non-regulated	No eCLIP peak	120167	760	Non-regulated
Gm8615	-1.59105	0.0275251	0.197482	chr5:149154128-149156192		610.644	970.754	-0.668774	175	Non-regulated	No eCLIP peak	109236	761	Non-regulated
Doc2b	-1.59069	0.00146888	0.0342565	chr11:75768270-75796060		602.008	958.537	-0.671051	22723	Non-regulated	No eCLIP peak	110239	762	Non-regulated
Cplane1	-1.59013	0.00436398	0.0638688	chr15:8169104-8271157		206.625	328.684	-0.669683	91584	Non-regulated	eCLIP Peak	110596	763	Non-regulated
Gja1	-1.58939	0.00647812	0.0822247	chr10:56377273-56402513		300.558	477.394	-0.667535	21176	Non-regulated	No eCLIP peak	111828	764	Non-regulated
Ttf1	-1.58936	0.0355946	0.228778	chr2:29060249-29087649		237.546	377.161	-0.666976	23235	Non-regulated	No eCLIP peak	112637	765	Non-regulated
Eif2ak4	-1.58899	0.00459275	0.0658511	chr2:118388617-118475234		535.219	850.27	-0.667792	81405	Non-regulated	No eCLIP peak	110738	766	Non-regulated
Ppp1r12b	-1.58853	0.000260625	0.0118669	chr1:134754659-134955944		5561.38	8834.66	-0.667732	192443	Non-regulated	No eCLIP peak	112788	767	Non-regulated
Cdc42bpg	-1.58827	0.017799	0.151669	chr19:6306457-6325652		122.339	194.304	-0.667432	13202	Non-regulated	No eCLIP peak	111757	768	Non-regulated
Klf13	-1.58813	0.000180574	0.00952814	chr7:63886351-63938915		2146.17	3409.02	-0.667597	46169	Downregulated	No eCLIP peak	111079	769	Downregulated without peak
Sbno1	-1.58798	0.00155421	0.0351048	chr5:124368702-124425958		332.866	529.056	-0.668479	47142	Non-regulated	No eCLIP peak	110231	770	Non-regulated
Tmem94	-1.58759	0.00323562	0.0543067	chr11:115765433-115799366		265.013	421.234	-0.668559	28605	Non-regulated	No eCLIP peak	110380	771	Non-regulated
Foxo6	-1.58717	0.257232	0.689745	chr4:120267078-120287349		205.611	326.505	-0.667188	17656	Non-regulated	No eCLIP peak	111672	772	Non-regulated
Tmod1	-1.58686	0.00343553	0.0561849	chr4:46039222-46116031		1461.95	2319.9	-0.666173	73940	Non-regulated	eCLIP Peak	116631	773	Non-regulated
Srrm1	-1.58543	9.23368e-05	0.00644601	chr4:135320485-135353153		2923.53	4635.31	-0.664953	29041	Downregulated	No eCLIP peak	117389	774	Downregulated without peak
Klhl33	-1.58485	0.00336487	0.0556296	chr14:50888581-50897483		870.533	1379.58	-0.664261	3413	Non-regulated	No eCLIP peak	127000	775	Non-regulated
Foxk1	-1.58444	0.00105111	0.027876	chr5:142401497-142829596		624.102	989.153	-0.664413	53073	Non-regulated	No eCLIP peak	122269	776	Non-regulated
Boc	-1.58417	0.0673351	0.332866	chr16:44485045-44558892		113.572	180.629	-0.669418	69398	Non-regulated	No eCLIP peak	109724	777	Non-regulated
U2surp	-1.58338	0.00301274	0.0521183	chr9:95456581-95511996		874.719	1384.95	-0.662942	47367	Non-regulated	No eCLIP peak	126985	778	Non-regulated
Csmd1	-1.58334	0.00803844	0.0930454	chr8:15892545-17535387		617.66	977.868	-0.662828	1628563	Non-regulated	eCLIP Peak	126641	779	Non-regulated
Ptpn6	-1.5831	0.0362335	0.230985	chr6:124720707-124738709		72.7995	115.422	-0.664916	15782	Non-regulated	No eCLIP peak	119938	780	Non-regulated
Fam168a	-1.58269	0.00090769	0.0254495	chr7:100706635-100841628		2367.18	3746.47	-0.662361	128346	Non-regulated	eCLIP Peak	110981	781	Non-regulated
Atf7ip	-1.58254	3.44838e-05	0.0033073	chr6:136518800-136610870		3063.25	4848.44	-0.662458	84002	Downregulated	No eCLIP peak	110663	782	Downregulated without peak
Smc1a	-1.58246	0.00479744	0.0675796	chrX:152016428-152062692		1156.6	1830.32	-0.662209	41576	Non-regulated	eCLIP Peak	111444	783	Non-regulated
Mtcl1	-1.58243	0.0032855	0.0548813	chr17:66336982-66449753		840.58	1330.84	-0.662879	105548	Non-regulated	eCLIP Peak	126716	784	Non-regulated
Cast	-1.58126	0.0460845	0.267012	chr13:74692368-74808760		201.688	318.731	-0.660212	111302	Non-regulated	No eCLIP peak	129874	785	Non-regulated
Armcx4	-1.58112	0.000301113	0.0128223	chrX:134686519-134697775		1956.4	3093.04	-0.660826	2243	Non-regulated	No eCLIP peak	117497	786	Non-regulated
Prpf40a	-1.5809	0.00297302	0.0518292	chr2:53134702-53191254		439.996	695.175	-0.659884	49148	Non-regulated	No eCLIP peak	128925	787	Non-regulated
Sparc	-1.58087	0.00371952	0.0586285	chr11:55394159-55420080		152.392	239.968	-0.655049	26494	Non-regulated	No eCLIP peak	116134	788	Non-regulated
Nrap	-1.58084	0.00629609	0.0805951	chr19:56320041-56390038		249.092	394.02	-0.661594	64496	Non-regulated	No eCLIP peak	111359	789	Non-regulated
Sez6	-1.58074	0.441811	0.829667	chr11:77930779-77979040		1584.44	2504.63	-0.660622	44010	Non-regulated	No eCLIP peak	119972	790	Non-regulated
Rin2	-1.57984	0.0306019	0.209461	chr2:145786116-145887616		55.7139	88.2577	-0.663685	110445	Non-regulated	No eCLIP peak	127415	791	Non-regulated
Cdk13	-1.57971	0.00142186	0.033582	chr13:17715962-17805097		531.606	839.843	-0.659762	82235	Non-regulated	No eCLIP peak	128677	792	Non-regulated
Mgat5	-1.57948	0.0106653	0.111177	chr1:127204986-127483704		1129.24	1783.45	-0.659321	274883	Non-regulated	eCLIP Peak	130966	793	Non-regulated
Nolc1	-1.5781	0.000420423	0.0159065	chr19:46075847-46085543		2212.9	3492.73	-0.658416	6032	Non-regulated	No eCLIP peak	127657	794	Non-regulated
Rbm28	-1.57804	0.00423974	0.0631588	chr6:29123575-29164725		755.165	1191.91	-0.658415	36966	Non-regulated	No eCLIP peak	129522	795	Non-regulated
Lpin1	-1.57782	0.00717869	0.0867879	chr12:16535669-16610967		119.486	188.639	-0.658789	105583	Non-regulated	eCLIP Peak	129177	796	Non-regulated
Chd8	-1.5778	0.00966272	0.104386	chr14:52198151-52257760		792.156	1250.22	-0.658327	51121	Non-regulated	No eCLIP peak	129162	797	Non-regulated
Ino80	-1.57752	0.01657	0.14493	chr2:119373042-119477687		343.707	541.995	-0.657101	98292	Non-regulated	No eCLIP peak	116156	798	Non-regulated
Magi2	-1.57725	0.00549271	0.0734705	chr5:19227046-20704791		1448.02	2283.73	-0.657306	1471141	Non-regulated	eCLIP Peak	130630	799	Non-regulated
Dtx3l	-1.57702	0.0297457	0.205738	chr16:35926512-35939027		111.852	176.785	-0.6604	7332	Non-regulated	No eCLIP peak	119549	800	Non-regulated
Bcor	-1.577	0.00483893	0.0678423	chrX:12036740-12160355		418.955	661.412	-0.658753	117500	Non-regulated	eCLIP Peak	128657	801	Non-regulated
Taok2	-1.57591	0.000463022	0.0168146	chr7:126865677-126884967		4901.21	7724.35	-0.656274	14306	Non-regulated	No eCLIP peak	115538	802	Non-regulated
Ddx3y	-1.57496	0.739574	0.906801	chrY:1260715-1286613		1755.48	2764.73	-0.655273	21259	Non-regulated	No eCLIP peak	114975	803	Non-regulated
Arhgap26	-1.57469	0.000125762	0.00769047	chr18:38993141-39376285		1947.38	3067.31	-0.65544	433247	Downregulated	eCLIP Peak	117431	804	Downregulated with peak
Ift74	-1.5746	0.0122268	0.121017	chr4:94614491-94693231		220.747	348.213	-0.657577	76600	Non-regulated	No eCLIP peak	129404	805	Non-regulated
Cc2d1b	-1.57389	0.00250436	0.0463477	chr4:108619937-108634122		510.901	804.89	-0.655749	10881	Non-regulated	No eCLIP peak	115563	806	Non-regulated
Zfp612	-1.57339	0.0121659	0.120642	chr8:110079734-110092752		706.127	1110.99	-0.653841	8117	Non-regulated	No eCLIP peak	119095	807	Non-regulated
Smc6	-1.57323	0.0086237	0.0974265	chr12:11265886-11319785		206.061	324.003	-0.652937	48297	Non-regulated	No eCLIP peak	119901	808	Non-regulated
Ddx23	-1.57312	0.000980925	0.0266519	chr15:98645507-98662896		2009.46	3161.18	-0.653653	14569	Non-regulated	eCLIP Peak	119671	809	Non-regulated
Csrnp2	-1.57311	0.000312318	0.0131049	chr15:100479566-100495262		421.191	662.575	-0.653608	11544	Non-regulated	No eCLIP peak	120140	810	Non-regulated
Rnf150	-1.57289	0.00610176	0.0790423	chr8:82863336-83091271		2718.24	4275.21	-0.653325	218231	Non-regulated	eCLIP Peak	124185	811	Non-regulated
Scn4b	-1.57272	0.0736562	0.350974	chr9:45138624-45154155		371.036	583.913	-0.654194	10776	Non-regulated	No eCLIP peak	116334	812	Non-regulated
Nbn	-1.57226	0.00363643	0.0579807	chr4:15957926-15992589		318.333	500.279	-0.652198	32132	Non-regulated	No eCLIP peak	119224	813	Non-regulated
Nyap2	-1.57173	0.00743935	0.0885862	chr1:81076948-81341764		574.434	903.463	-0.653324	256681	Non-regulated	eCLIP Peak	122071	814	Non-regulated
Ptprf	-1.57152	0.000778042	0.0234035	chr4:118208213-118291397		599.136	941.337	-0.651828	75537	Non-regulated	No eCLIP peak	119428	815	Non-regulated
Wwc2	-1.57141	0.0024239	0.0454719	chr8:47823959-47990926		685.574	1077.61	-0.652448	157915	Non-regulated	No eCLIP peak	119651	816	Non-regulated
Sorl1	-1.57082	0.00330902	0.0550603	chr9:41964709-42124297		6756.48	10613	-0.651486	148863	Non-regulated	No eCLIP peak	119184	817	Non-regulated
Septin9	-1.57056	1.92614e-06	0.000533135	chr11:117199661-117362325		427.938	671.406	-0.649782	159049	Downregulated	eCLIP Peak	119345	818	Downregulated with peak
Insr	-1.56955	0.000751548	0.0228462	chr8:3150922-3279617		1017.52	1597.15	-0.650448	119341	Non-regulated	No eCLIP peak	119929	819	Non-regulated
Tap1	-1.56891	0.0172283	0.148734	chr17:34187552-34197225		79.8911	125.559	-0.652264	6720	Non-regulated	No eCLIP peak	118255	820	Non-regulated
Dzip1l	-1.56842	0.00899185	0.0995223	chr9:99629531-99670075		338.369	530.701	-0.649301	35734	Non-regulated	No eCLIP peak	118070	821	Non-regulated
Synm	-1.56807	0.000589278	0.019614	chr7:67730161-67759743		381.043	596.821	-0.647343	22622	Non-regulated	No eCLIP peak	121154	822	Non-regulated
Atp2b1	-1.56756	0.00065328	0.0209275	chr10:98914642-99026143		7092.97	11118.7	-0.648528	103862	Non-regulated	No eCLIP peak	118515	823	Non-regulated
Epb41l2	-1.56737	0.0190863	0.157946	chr10:25359797-25523519		275.283	431.094	-0.647091	159333	Non-regulated	eCLIP Peak	122050	824	Non-regulated
Meis2	-1.56716	0.318097	0.750602	chr2:115861264-116158373		2116.33	3316.74	-0.648203	199058	Non-regulated	eCLIP Peak	118185	825	Non-regulated
Dnajc13	-1.56703	0.00977843	0.105199	chr9:104151597-104262934		1156.62	1812.33	-0.647934	103637	Non-regulated	eCLIP Peak	124038	826	Non-regulated
Usp42	-1.5668	0.00238235	0.0450406	chr5:143710325-143732280		584.125	915.829	-0.648801	16805	Non-regulated	No eCLIP peak	118583	827	Non-regulated
Npat	-1.56645	0.00328865	0.0549047	chr9:53537046-53575627		455.809	714.251	-0.648002	31234	Non-regulated	No eCLIP peak	122054	828	Non-regulated
Bcl9l	-1.56626	7.50545e-06	0.0013157	chr9:44482825-44511906		1323.17	2073.39	-0.647997	21838	Downregulated	No eCLIP peak	121756	829	Downregulated without peak
Col23a1	-1.56617	0.00439847	0.064106	chr11:51289920-51583901		596.555	934.5	-0.647539	288341	Non-regulated	eCLIP Peak	123098	830	Non-regulated
Iqsec3	-1.56535	0.000238181	0.0112383	chr6:121372927-121473678		8147.2	12753.2	-0.646486	93906	Non-regulated	eCLIP Peak	121880	831	Non-regulated
Vav2	-1.56487	0.00670912	0.0836427	chr2:27262099-27427608		175.03	273.884	-0.645961	159709	Non-regulated	eCLIP Peak	122422	832	Non-regulated
Hpcal4	-1.56431	0.229772	0.659411	chr4:123183504-123194699		25814.1	40381.3	-0.645527	6544	Non-regulated	No eCLIP peak	121387	833	Non-regulated
Celsr2	-1.56344	0.00234479	0.0447326	chr3:108390848-108415579		1323.64	2069.77	-0.644954	14104	Non-regulated	No eCLIP peak	121445	834	Non-regulated
Taok1	-1.56289	0.00578555	0.0763518	chr11:77529162-77625322		3912.58	6114.48	-0.644111	66245	Non-regulated	No eCLIP peak	128016	835	Non-regulated
Eif3a	-1.56284	0.00801019	0.0928558	chr19:60761116-60790701		1531.45	2393.51	-0.64423	24402	Non-regulated	No eCLIP peak	124189	836	Non-regulated
Uhrf1bp1	-1.56212	0.00512259	0.0702575	chr17:27856489-27900040		1077.31	1683.23	-0.643808	34967	Non-regulated	No eCLIP peak	128454	837	Non-regulated
Lmln	-1.56201	0.00897325	0.0994527	chr16:33062519-33125659		617.893	964.987	-0.643154	59028	Non-regulated	No eCLIP peak	130875	838	Non-regulated
Limd1	-1.56158	0.000251805	0.0116162	chr9:123478701-123521550		326.022	509.463	-0.644006	37999	Non-regulated	eCLIP Peak	128472	839	Non-regulated
Tnip2	-1.56126	0.00279969	0.0499104	chr5:34496087-34513979		169.402	265.196	-0.646606	15918	Non-regulated	No eCLIP peak	121403	840	Non-regulated
Rcor1	-1.56114	0.0629663	0.319479	chr12:111039367-111115902		233.654	364.419	-0.641222	70867	Non-regulated	eCLIP Peak	130470	841	Non-regulated
Gsn	-1.56077	0.000593142	0.0196803	chr2:35256359-35307902		358.373	560.222	-0.644538	48904	Non-regulated	No eCLIP peak	123988	842	Non-regulated
Zfp970	-1.5606	0.0373561	0.234982	chr2:177464742-177479194		403.083	628.254	-0.640273	12603	Non-regulated	No eCLIP peak	132693	843	Non-regulated
Dennd2a	-1.55993	0.0425665	0.255448	chr6:39462378-39557835		178.686	278.979	-0.642729	91022	Non-regulated	eCLIP Peak	130565	844	Non-regulated
Spc24	-1.55921	0.0359077	0.229824	chr9:21753501-21760305		59.7806	92.9362	-0.636563	3496	Non-regulated	No eCLIP peak	136504	845	Non-regulated
Prdm11	-1.55913	0.0754364	0.355949	chr2:92965153-93046165		92.1986	143.602	-0.639256	68743	Non-regulated	eCLIP Peak	133080	846	Non-regulated
Sparcl1	-1.55879	0.00371979	0.0586285	chr5:104079104-104114088		43466.3	67754.6	-0.640421	31864	Non-regulated	No eCLIP peak	130699	847	Non-regulated
Gon4l	-1.55832	0.00159904	0.0355225	chr3:88835230-88910098		574.527	895.733	-0.640694	67336	Non-regulated	No eCLIP peak	131043	848	Non-regulated
Odf2	-1.55817	6.7163e-05	0.00515635	chr2:29889014-29931746		1289.35	2009.69	-0.640328	38125	Downregulated	eCLIP Peak	132030	849	Downregulated with peak
Klf12	-1.55816	0.0250153	0.185857	chr14:99870645-100109866		458.916	714.581	-0.638867	408158	Non-regulated	eCLIP Peak	130806	850	Non-regulated
Zfp458	-1.55774	0.0153994	0.138951	chr13:67226853-67278467		232.032	360.719	-0.636553	20061	Non-regulated	No eCLIP peak	136976	851	Non-regulated
Ino80d	-1.55724	0.0424109	0.254805	chr1:62958419-63114316		71.5048	111.289	-0.638201	129887	Non-regulated	eCLIP Peak	124841	852	Non-regulated
Frmd4b	-1.55722	0.0121858	0.120763	chr6:97286868-97617657		568.07	883.914	-0.637836	325762	Non-regulated	eCLIP Peak	124431	853	Non-regulated
Dync2h1	-1.55692	0.0105345	0.110251	chr9:6928502-7184512		630.433	981.615	-0.638815	241680	Non-regulated	No eCLIP peak	127299	854	Non-regulated
Igf1r	-1.5569	0.00156403	0.0351853	chr7:67952257-68233667		3483.76	5424.63	-0.63888	269433	Non-regulated	eCLIP Peak	131953	855	Non-regulated
Phf21b	-1.55672	0.0482818	0.273973	chr15:84785376-84856131		92.3918	143.156	-0.63175	67027	Non-regulated	eCLIP Peak	136581	856	Non-regulated
Adarb1	-1.55667	0.00516871	0.0706033	chr10:77290393-77418273		13222.6	20582.9	-0.638442	120961	Non-regulated	eCLIP Peak	125071	857	Non-regulated
Panx2	-1.5563	0.000122824	0.00761521	chr15:89059726-89070907		1221.24	1901.09	-0.638474	7770	Downregulated	No eCLIP peak	125045	858	Downregulated without peak
Npas2	-1.55608	0.0499019	0.2795	chr1:39194204-39363240		312.426	486.571	-0.639137	164789	Non-regulated	No eCLIP peak	132935	859	Non-regulated
Zbtb46	-1.55599	0.136607	0.50233	chr2:181387766-181459428		61.2535	95.884	-0.646498	66356	Non-regulated	No eCLIP peak	121402	860	Non-regulated
Sorcs1	-1.55575	0.0162879	0.143661	chr19:50143301-50678647		64.7544	100.371	-0.632294	530950	Non-regulated	eCLIP Peak	141289	861	Non-regulated
Hip1r	-1.55511	0.000631667	0.0205693	chr5:123973628-124003214		1222.6	1902.13	-0.63766	25196	Non-regulated	eCLIP Peak	121505	862	Non-regulated
Srcin1	-1.55503	0.000134885	0.00797035	chr11:97509340-97575132		6311.19	9815.02	-0.637078	58798	Downregulated	eCLIP Peak	136847	863	Downregulated with peak
Mast3	-1.55409	0.297787	0.731441	chr8:70778117-70796990		265.438	412.616	-0.636424	13567	Non-regulated	No eCLIP peak	137234	864	Non-regulated
Bmf	-1.55407	0.000124071	0.00764634	chr2:118528757-118549689		424.491	660.2	-0.637169	16289	Downregulated	No eCLIP peak	136991	865	Downregulated without peak
Ebf3	-1.55327	0.000929086	0.0258067	chr7:137193673-137314445		731.567	1137.23	-0.636457	115779	Non-regulated	No eCLIP peak	138214	866	Non-regulated
Mecp2	-1.55319	1.16235e-05	0.0018169	chrX:74026593-74085690		8389.25	13029.8	-0.635197	98361	Downregulated	No eCLIP peak	141356	867	Downregulated without peak
Hr	-1.55316	0.00109491	0.0286057	chr14:70554056-70573548		808.22	1254.48	-0.634269	14006	Non-regulated	No eCLIP peak	147633	868	Non-regulated
Kcnq3	-1.55297	0.00893965	0.0992896	chr15:65986374-66286629		706.672	1097.4	-0.634977	288432	Non-regulated	eCLIP Peak	144745	869	Non-regulated
Erbb2	-1.55295	0.066088	0.329605	chr11:98412484-98437716		48.0145	74.3705	-0.631259	20235	Non-regulated	No eCLIP peak	139727	870	Non-regulated
Crebbp	-1.55251	0.0476122	0.271923	chr16:4084041-4213407		802.04	1245.19	-0.634621	121850	Non-regulated	No eCLIP peak	144437	871	Non-regulated
Atrn	-1.55212	0.00910948	0.100429	chr2:130906491-131030324		1830.14	2840.46	-0.63417	115094	Non-regulated	No eCLIP peak	149091	872	Non-regulated
Thsd7a	-1.55192	0.00886309	0.0989121	chr6:12310787-12749253		11543.1	17913.7	-0.634034	426646	Non-regulated	eCLIP Peak	148171	873	Non-regulated
Gpd1	-1.55188	0.408766	0.799097	chr15:99717585-99725125		154.96	240.51	-0.6342	4630	Non-regulated	No eCLIP peak	147823	874	Non-regulated
Psd2	-1.5518	7.18808e-05	0.00542614	chr18:35964830-36014713		318.885	494.248	-0.632196	45276	Downregulated	No eCLIP peak	136310	875	Downregulated without peak
Flrt3	-1.55171	0.0532786	0.289804	chr2:140650916-140671476		207.144	321.664	-0.634921	19798	Non-regulated	No eCLIP peak	142451	876	Non-regulated
Adam22	-1.55085	0.00472075	0.0669283	chr5:8072347-8368160		2356.5	3654.2	-0.632908	286485	Non-regulated	eCLIP Peak	143559	877	Non-regulated
Phactr2	-1.55035	0.0069875	0.0852605	chr10:13207717-13474396		834.812	1294.35	-0.632709	258140	Non-regulated	eCLIP Peak	143474	878	Non-regulated
Gpatch1	-1.54959	0.000314214	0.0131259	chr7:35276544-35318440		659.421	1022.44	-0.632742	38840	Non-regulated	No eCLIP peak	143830	879	Non-regulated
Tox3	-1.54943	0.119094	0.46381	chr8:90243999-90348252		62.4545	96.7326	-0.631198	97948	Non-regulated	No eCLIP peak	139829	880	Non-regulated
Hivep2	-1.54799	0.000231316	0.0111184	chr10:13966074-14151376		2294.67	3551.68	-0.630214	175150	Non-regulated	eCLIP Peak	139097	881	Non-regulated
Nol4l	-1.54792	0.0113549	0.115773	chr2:153407462-153529973		697.948	1080.5	-0.630507	116111	Non-regulated	eCLIP Peak	139811	882	Non-regulated
Zbtb7a	-1.54761	0.000618384	0.0203355	chr10:81136271-81152995		1400.4	2168.34	-0.630752	14742	Non-regulated	No eCLIP peak	138881	883	Non-regulated
Grik2	-1.54676	0.387082	0.793776	chr10:49093335-49788755		162.397	251.285	-0.629797	684507	Non-regulated	eCLIP Peak	140228	884	Non-regulated
Dusp10	-1.54662	0.155858	0.540375	chr1:184034381-184075636		46.01	71.5605	-0.637218	38464	Non-regulated	No eCLIP peak	121487	885	Non-regulated
Arhgap22	-1.5461	0.0167505	0.146209	chr14:33216822-33369936		188.402	292.259	-0.633433	150516	Non-regulated	eCLIP Peak	144104	886	Non-regulated
Tmem132b	-1.54576	0.032274	0.216353	chr5:125532418-125792583		1177.05	1819.42	-0.628303	252202	Non-regulated	eCLIP Peak	135319	887	Non-regulated
Mchr1	-1.54534	0.386832	0.793776	chr15:81235499-81238963		250.898	387.79	-0.628171	1277	Non-regulated	No eCLIP peak	133075	888	Non-regulated
Ppp1r16b	-1.54532	8.97796e-07	0.00029444	chr2:158665396-158766334		701.808	1084.2	-0.627489	94252	Downregulated	eCLIP Peak	122182	889	Downregulated with peak
Nrxn1	-1.5453	0.00386093	0.0598663	chr17:90033644-91092952		9179.78	14185.2	-0.627858	1050119	Non-regulated	eCLIP Peak	133075	890	Non-regulated
Rnf169	-1.54504	9.68233e-05	0.00661291	chr7:99920254-99980458		854.75	1320.37	-0.627371	53048	Downregulated	No eCLIP peak	121294	891	Downregulated without peak
Apbb2	-1.54499	0.00156735	0.0351853	chr5:66298351-66618817		5725.55	8845.49	-0.627529	313425	Non-regulated	eCLIP Peak	124189	892	Non-regulated
Tecpr1	-1.54491	0.00124684	0.0310275	chr5:144194442-144223615		10404.7	16074.8	-0.627562	24068	Non-regulated	eCLIP Peak	124009	893	Non-regulated
Kcnk9	-1.5447	0.0436159	0.258624	chr15:72506986-72547699		137.989	213.541	-0.629963	32952	Non-regulated	No eCLIP peak	140059	894	Non-regulated
Ptcd1	-1.54448	0.001352	0.0327657	chr5:145147378-145167104		910.001	1405.58	-0.627227	16508	Non-regulated	No eCLIP peak	121195	895	Non-regulated
Rftn1	-1.54314	0.348453	0.773611	chr17:49992257-50190497		121.034	186.808	-0.626147	194389	Non-regulated	No eCLIP peak	122231	896	Non-regulated
Ngfr	-1.54287	0.120493	0.466156	chr11:95568818-95587699		94.4356	145.911	-0.627685	15472	Non-regulated	No eCLIP peak	123217	897	Non-regulated
Sstr1	-1.54267	0.0857431	0.383058	chr12:58211804-58216036		362.83	559.783	-0.625573	627	Non-regulated	No eCLIP peak	120483	898	Non-regulated
Zfp971	-1.54127	0.0124219	0.121992	chr2:178023283-178035859		324.223	499.71	-0.624102	9231	Non-regulated	No eCLIP peak	122257	899	Non-regulated
Magi3	-1.54125	0.0140071	0.13119	chr3:104013267-104220406		1081.73	1667.23	-0.62411	200476	Non-regulated	eCLIP Peak	122002	900	Non-regulated
Unc13b	-1.54082	0.0508614	0.282351	chr4:43058953-43264873		280.404	431.855	-0.623038	199549	Non-regulated	eCLIP Peak	130088	901	Non-regulated
Blm	-1.54033	0.0362454	0.230985	chr7:80454993-80535121		125.127	192.97	-0.624978	75529	Non-regulated	No eCLIP peak	122355	902	Non-regulated
Sgcg	-1.54032	1.33756e-05	0.00194494	chr14:61219115-61258490		485.691	748.519	-0.624	35861	Downregulated	No eCLIP peak	124289	903	Downregulated without peak
Dgkg	-1.53993	0.00237596	0.0450277	chr16:22466571-22657231		3077.99	4739.92	-0.622875	185158	Non-regulated	eCLIP Peak	130378	904	Non-regulated
Rbm25	-1.53961	0.0176937	0.150894	chr12:83631235-83683127		1057.9	1628.75	-0.622554	46646	Non-regulated	No eCLIP peak	130571	905	Non-regulated
Ncam2	-1.53952	0.0574792	0.301981	chr16:81200697-81624285		233.313	358.835	-0.621055	420026	Non-regulated	No eCLIP peak	129156	906	Non-regulated
Poc1b	-1.53942	0.142803	0.51431	chr10:99107082-99198067		51.4694	78.9917	-0.617985	87523	Non-regulated	No eCLIP peak	130186	907	Non-regulated
Slit1	-1.5394	0.281374	0.711188	chr19:41600259-41743858		486.963	749.757	-0.622612	138362	Non-regulated	eCLIP Peak	131389	908	Non-regulated
Emsy	-1.5392	0.0167431	0.146184	chr7:98588920-98656785		444.973	684.426	-0.621177	61950	Non-regulated	No eCLIP peak	128902	909	Non-regulated
Rptor	-1.5391	0.0033406	0.055391	chr11:119602904-119899590		1357.15	2089.15	-0.622334	289665	Non-regulated	eCLIP Peak	130920	910	Non-regulated
Cbfa2t3	-1.53893	0.00191141	0.0396011	chr8:122625136-122699109		426.674	656.39	-0.621419	66324	Non-regulated	eCLIP Peak	128107	911	Non-regulated
Ankrd35	-1.53846	0.00389316	0.0601886	chr3:96670131-96691034		576.913	888.519	-0.62305	16850	Non-regulated	No eCLIP peak	125487	912	Non-regulated
Otud3	-1.53806	0.00583597	0.0768245	chr4:138891063-138913971		728.899	1120.81	-0.620754	16899	Non-regulated	eCLIP Peak	129642	913	Non-regulated
Lrrc45	-1.53795	0.00622501	0.0798302	chr11:120713950-120721125		530.666	816.157	-0.621043	4712	Non-regulated	No eCLIP peak	127579	914	Non-regulated
Gm14322	-1.53777	0.0200227	0.162416	chr2:177759285-177773273		258.865	397.255	-0.617865	9931	Non-regulated	No eCLIP peak	137744	915	Non-regulated
Cdk18	-1.53757	0.22138	0.646597	chr1:132113550-132139691		953.187	1465.76	-0.620815	23093	Non-regulated	No eCLIP peak	127595	916	Non-regulated
Srrm3	-1.53713	0.00346006	0.0563057	chr5:135806889-135874772		514.175	790.576	-0.620646	52735	Non-regulated	No eCLIP peak	130500	917	Non-regulated
Sprr1a	-1.53712	0.0312739	0.212125	chr3:92483955-92485895		111.317	170.654	-0.616401	1138	Non-regulated	No eCLIP peak	132892	918	Non-regulated
Ptpn3	-1.53706	0.602583	0.904264	chr4:57190841-57301838		41.4646	63.7554	-0.620666	104628	Non-regulated	No eCLIP peak	129520	919	Non-regulated
Per2	-1.53697	0.0701112	0.340352	chr1:91415982-91459332		148.88	228.956	-0.620917	37510	Non-regulated	eCLIP Peak	127896	920	Non-regulated
Stox2	-1.53676	0.0084938	0.0964771	chr8:47180048-47352348		3433	5275.75	-0.619907	224094	Non-regulated	eCLIP Peak	132056	921	Non-regulated
Eprs	-1.53664	0.0220746	0.172412	chr1:185363043-185428360		449.942	691.456	-0.619898	60411	Non-regulated	No eCLIP peak	130098	922	Non-regulated
Foxn3	-1.53555	0.0251801	0.186642	chr12:99194629-99450100		210.178	322.211	-0.616395	252370	Non-regulated	eCLIP Peak	132968	923	Non-regulated
Triobp	-1.53397	0.0216305	0.170387	chr15:78947724-79005869		164.631	253.056	-0.62022	50819	Non-regulated	No eCLIP peak	131388	924	Non-regulated
Frmd4a	-1.53307	0.00600534	0.0783052	chr2:4017683-4614043		1517.73	2326.89	-0.616493	589760	Non-regulated	eCLIP Peak	138441	925	Non-regulated
Abcc8	-1.53277	0.00889955	0.0991583	chr7:46104523-46180033		252.864	388.041	-0.617848	70559	Non-regulated	No eCLIP peak	138922	926	Non-regulated
Grm4	-1.53246	0.000296142	0.0126812	chr17:27422390-27513397		754.391	1155.86	-0.615577	92046	Non-regulated	eCLIP Peak	130947	927	Non-regulated
Grid2ip	-1.53224	0.01208	0.120289	chr5:143357330-143393607		218.32	335.143	-0.618332	30306	Non-regulated	No eCLIP peak	130006	928	Non-regulated
Cdk15	-1.53202	0.124279	0.474367	chr1:59256906-59352448		57.1695	87.5201	-0.61437	93980	Non-regulated	No eCLIP peak	134290	929	Non-regulated
Ubr4	-1.53174	0.00590262	0.0773469	chr4:139380659-139489590		956.444	1465.39	-0.615534	113094	Non-regulated	eCLIP Peak	131265	930	Non-regulated
C920021L13Rik	-1.53104	0.200917	0.614886	chr3:95871522-95889093		18.5774	28.44	-0.614367	15846	Non-regulated	No eCLIP peak	133627	931	Non-regulated
Slc6a11	-1.53053	6.35392e-05	0.00495041	chr6:114131237-114249947		596.904	913.557	-0.613997	114580	Downregulated	eCLIP Peak	134498	932	Downregulated with peak
Kif5c	-1.53016	0.00053079	0.0184089	chr2:49619286-49774777		11673	17861.7	-0.613697	148625	Non-regulated	eCLIP Peak	133654	933	Non-regulated
Kdm3b	-1.52966	0.00614441	0.0792955	chr18:34777008-34839370		1023.02	1565.15	-0.613466	55251	Non-regulated	No eCLIP peak	133026	934	Non-regulated
Maml3	-1.52917	0.0425462	0.255375	chr3:51685913-52105076		675.212	1032.37	-0.612549	410882	Non-regulated	eCLIP Peak	133794	935	Non-regulated
Tpd52l1	-1.529	0.276974	0.706511	chr10:31332373-31445958		620.726	949.012	-0.612471	112275	Non-regulated	No eCLIP peak	136478	936	Non-regulated
Zfp521	-1.52863	0.00703068	0.0855768	chr18:13687013-13972733		475.556	726.536	-0.611419	279569	Non-regulated	No eCLIP peak	135762	937	Non-regulated
Syne2	-1.5281	0.000102292	0.00679964	chr12:75818317-76110900		902.735	1380.6	-0.612917	270905	Downregulated	eCLIP Peak	135632	938	Downregulated with peak
Ralgds	-1.52793	0.00502865	0.0694796	chr2:28513167-28553081		1288.93	1969.93	-0.611967	36166	Non-regulated	No eCLIP peak	136052	939	Non-regulated
Ylpm1	-1.5279	0.003518	0.0568683	chr12:84996320-85074533		816.925	1249.06	-0.612563	69279	Non-regulated	No eCLIP peak	133253	940	Non-regulated
Mmp11	-1.52733	0.0738512	0.351425	chr10:75923224-75932502		46.5727	71.3898	-0.616233	8654	Non-regulated	No eCLIP peak	130981	941	Non-regulated
Galnt16	-1.52711	0.00073758	0.022552	chr12:80518471-80603898		882.395	1347.06	-0.610317	81394	Non-regulated	No eCLIP peak	134861	942	Non-regulated
Amotl2	-1.52641	0.0287623	0.202833	chr9:102716953-102733417		158.605	242.611	-0.613205	12390	Non-regulated	No eCLIP peak	134888	943	Non-regulated
Pcnx	-1.52622	0.000708457	0.022046	chr12:81860030-82000924		1340.24	2045.31	-0.609829	128756	Non-regulated	eCLIP Peak	134561	944	Non-regulated
Tex15	-1.52568	0.110552	0.444885	chr8:33570542-33585585		116.582	177.548	-0.606864	65633	Non-regulated	No eCLIP peak	134130	945	Non-regulated
Herc2	-1.52529	0.00780582	0.0912042	chr7:56050155-56231800		1399.47	2134.61	-0.609087	166298	Non-regulated	eCLIP Peak	134766	946	Non-regulated
Adar	-1.52524	0.000322145	0.0133049	chr3:89715021-89753454		6675.62	10182.5	-0.60911	32516	Non-regulated	No eCLIP peak	134217	947	Non-regulated
Soga3	-1.52493	0.00736267	0.0881007	chr10:29143839-29199630		2127.92	3245.03	-0.608788	51687	Non-regulated	No eCLIP peak	132772	948	Non-regulated
Wnk2	-1.52433	0.000237114	0.0112341	chr13:49036302-49148328		1589.91	2424.59	-0.608796	105082	Non-regulated	eCLIP Peak	133641	949	Non-regulated
Map3k20	-1.52419	0.108285	0.440064	chr2:72285635-72442608		94.2877	143.567	-0.606582	153640	Non-regulated	No eCLIP peak	135219	950	Non-regulated
Naa15	-1.52377	0.00118514	0.0299415	chr3:51416016-51475985		334.852	509.797	-0.606399	53880	Non-regulated	No eCLIP peak	133767	951	Non-regulated
Ccdc63	-1.5231	0.03426	0.224189	chr5:122108052-122138063		105.015	160.429	-0.611338	27724	Non-regulated	No eCLIP peak	134555	952	Non-regulated
Ccdc157	-1.522	0.0125104	0.12267	chr11:4141123-4160295		449.857	684.825	-0.606268	14018	Non-regulated	No eCLIP peak	144098	953	Non-regulated
Acsbg1	-1.52183	0.0188124	0.156625	chr9:54604885-54661885		140.407	214.094	-0.608632	54114	Non-regulated	eCLIP Peak	133338	954	Non-regulated
Rasgrp3	-1.52168	0.0457063	0.265945	chr17:75435905-75529054		271.768	413.467	-0.605396	88474	Non-regulated	No eCLIP peak	145337	955	Non-regulated
Glg1	-1.5215	0.00133028	0.0324065	chr8:111153284-111259217		11189.3	17024.6	-0.6055	97775	Non-regulated	eCLIP Peak	145090	956	Non-regulated
Igdcc4	-1.52127	0.00463287	0.0661773	chr9:65100946-65137947		227.89	346.562	-0.604773	30232	Non-regulated	No eCLIP peak	145063	957	Non-regulated
Dynlrb2	-1.52112	0.252419	0.685413	chr8:116505015-116515915		68.1012	103.636	-0.605775	10415	Non-regulated	No eCLIP peak	143966	958	Non-regulated
Nrxn3	-1.52032	0.0126392	0.123473	chr12:88722874-90334931		11302.9	17183.8	-0.604362	1604310	Non-regulated	eCLIP Peak	144902	959	Non-regulated
Mast1	-1.52017	0.00163442	0.0358889	chr8:84911475-84937359		1438.68	2187.77	-0.604712	23374	Non-regulated	No eCLIP peak	145038	960	Non-regulated
Gm5124	-1.51942	3.06654e-05	0.00310492	chrX:21360864-21364627		927.609	1409.58	-0.603671	1788	Downregulated	No eCLIP peak	129215	961	Downregulated without peak
Mia3	-1.51914	0.00507247	0.069811	chr1:183326236-183369565		2513.08	3817.64	-0.603226	24143	Non-regulated	No eCLIP peak	129204	962	Non-regulated
D130043K22Rik	-1.51849	0.018213	0.153662	chr13:24845112-24901439		969.258	1472.11	-0.60293	51163	Non-regulated	No eCLIP peak	129507	963	Non-regulated
Ino80dos	-1.51763	0.0662302	0.329886	chr1:63114471-63158295		64.1817	96.7796	-0.592541	42244	Non-regulated	eCLIP Peak	125204	964	Non-regulated
Rell1	-1.51755	0.0171494	0.148337	chr5:63908898-63968897		234.272	355.012	-0.599683	56760	Non-regulated	No eCLIP peak	126359	965	Non-regulated
Jag2	-1.51695	0.000154752	0.00876666	chr12:112907822-112929496		392.262	595.305	-0.601811	16852	Downregulated	eCLIP Peak	129048	966	Downregulated with peak
Srrm4	-1.51681	0.00370924	0.0585792	chr5:116439272-116591819		241.454	366.442	-0.601834	145070	Non-regulated	eCLIP Peak	130023	967	Non-regulated
Zfpm2	-1.51596	0.108115	0.439848	chr15:40655033-41104592		68.5092	103.792	-0.599323	444577	Non-regulated	eCLIP Peak	123931	968	Non-regulated
Nek1	-1.5154	0.0357841	0.229312	chr8:60993193-61131344		462.935	701.258	-0.599138	132751	Non-regulated	No eCLIP peak	119962	969	Non-regulated
Srgap3	-1.51536	0.00102839	0.0274534	chr6:112717971-112947268		12793.1	19386.3	-0.599667	220409	Non-regulated	eCLIP Peak	125989	970	Non-regulated
Snx29	-1.51535	0.00130555	0.0319839	chr16:11322904-11755473		301.414	457.151	-0.600923	429898	Non-regulated	eCLIP Peak	129223	971	Non-regulated
Zfp318	-1.51447	0.0038027	0.0592838	chr17:46383766-46420920		598.925	907.338	-0.599265	33234	Non-regulated	No eCLIP peak	119854	972	Non-regulated
Zmynd8	-1.51409	0.0016952	0.0367397	chr2:165784152-165896950		843.606	1277.23	-0.598381	95507	Non-regulated	No eCLIP peak	126280	973	Non-regulated
Tyro3	-1.51409	0.315977	0.750602	chr2:119798221-119818101		1496.24	2265.55	-0.598519	15912	Non-regulated	No eCLIP peak	126248	974	Non-regulated
Sorbs2	-1.51376	0.00341062	0.0560514	chr8:45507787-45827906		1018.29	1541.69	-0.598367	313782	Non-regulated	eCLIP Peak	126175	975	Non-regulated
Mapk8ip3	-1.51338	0.00138983	0.0331479	chr17:24897506-24936977		14784.8	22375.4	-0.597803	37508	Non-regulated	eCLIP Peak	124069	976	Non-regulated
Nfat5	-1.5121	0.0563022	0.298892	chr8:107293469-107379517		225.812	341.709	-0.597649	72605	Non-regulated	No eCLIP peak	124217	977	Non-regulated
Ebf1	-1.51173	0.0789636	0.364965	chr11:44618129-45008096		165.068	249.754	-0.597452	384794	Non-regulated	eCLIP Peak	125398	978	Non-regulated
Anxa2	-1.51166	0.219074	0.64389	chr9:69453681-69491793		34.5957	51.9599	-0.586808	36729	Non-regulated	No eCLIP peak	122138	979	Non-regulated
Il4ra	-1.51082	0.0308452	0.210578	chr7:125552238-125579474		138.782	210.167	-0.598712	22099	Non-regulated	No eCLIP peak	119338	980	Non-regulated
Tbc1d5	-1.51079	0.0600055	0.31065	chr17:50733127-51179353		113.507	172.155	-0.600918	440610	Non-regulated	No eCLIP peak	130482	981	Non-regulated
Abl1	-1.51045	0.000246884	0.0115069	chr2:31688375-31804362		2661.47	4020.18	-0.595035	108664	Non-regulated	eCLIP Peak	124258	982	Non-regulated
Celf4	-1.51009	3.77941e-05	0.00341706	chr18:25477620-25754158		14538.3	21954.8	-0.594682	272357	Downregulated	eCLIP Peak	123602	983	Downregulated with peak
Rimbp2	-1.51002	0.0024323	0.0455212	chr5:128710652-128953487		1657.93	2503.12	-0.594349	188698	Non-regulated	eCLIP Peak	125018	984	Non-regulated
Acadl	-1.50972	0.144096	0.517306	chr1:66830839-66863309		69.5656	105.111	-0.595469	30523	Non-regulated	No eCLIP peak	121835	985	Non-regulated
Cd3eap	-1.50941	0.00297614	0.0518396	chr7:19356014-19359483		1282.14	1935.3	-0.594002	1229	Non-regulated	No eCLIP peak	123290	986	Non-regulated
Trim66	-1.50914	0.0039682	0.0610158	chr7:109449001-109508134		829.763	1252.82	-0.594407	50005	Non-regulated	No eCLIP peak	121508	987	Non-regulated
Tab1	-1.50888	0.000264065	0.0119374	chr15:80133145-80161704		892.686	1347.5	-0.594056	25617	Non-regulated	No eCLIP peak	123351	988	Non-regulated
Pacs2	-1.50832	0.000447815	0.0165267	chr12:113014508-113074401		1671.06	2520.95	-0.593201	54414	Non-regulated	eCLIP Peak	123993	989	Non-regulated
Rara	-1.5076	0.0215461	0.169966	chr11:98937675-98974942		163.707	247.223	-0.594702	43965	Non-regulated	No eCLIP peak	123404	990	Non-regulated
Cabin1	-1.50703	0.00237882	0.0450278	chr10:75646110-75764357		670.971	1011.71	-0.592474	110788	Non-regulated	eCLIP Peak	125158	991	Non-regulated
Peg3	-1.50656	0.0526372	0.287355	chr7:6705894-6730422		251.176	378.216	-0.590509	17836	Non-regulated	No eCLIP peak	129076	992	Non-regulated
Mpdz	-1.50655	0.00312353	0.0531606	chr4:81278499-81442816		282.091	424.213	-0.588629	156788	Non-regulated	No eCLIP peak	129657	993	Non-regulated
Trib3	-1.50636	0.237579	0.668859	chr2:152337425-152344060		26.1024	39.1509	-0.584865	4585	Non-regulated	No eCLIP peak	124794	994	Non-regulated
Kif1b	-1.50589	0.00370612	0.0585593	chr4:149176320-149307735		26537	39961.7	-0.590614	121141	Non-regulated	eCLIP Peak	129823	995	Non-regulated
Pkp4	-1.50567	0.000134271	0.0079545	chr2:59160848-59355205		2968.89	4470.29	-0.590444	189742	Downregulated	eCLIP Peak	129640	996	Downregulated with peak
Kcnd3	-1.50559	0.00382437	0.059504	chr3:105451890-105674002		299.311	450.225	-0.589001	214504	Non-regulated	eCLIP Peak	130501	997	Non-regulated
Arrdc2	-1.50554	0.117831	0.460982	chr8:70835130-70839720		67.3772	101.792	-0.595288	2237	Non-regulated	No eCLIP peak	122778	998	Non-regulated
Unc79	-1.50542	0.00631142	0.0806277	chr12:102948859-103183998		427.572	643.286	-0.589295	226269	Non-regulated	eCLIP Peak	131642	999	Non-regulated
4931415C17Rik	-1.50519	0.102505	0.426698	chr8:12672184-12679229		111.7	168.378	-0.592066	4548	Non-regulated	No eCLIP peak	124450	1000	Non-regulated
Hecw1	-1.50356	0.00606922	0.0788424	chr13:14226438-14523229		1144.19	1720.22	-0.588261	287329	Non-regulated	eCLIP Peak	121778	1001	Non-regulated
Ltbr	-1.50323	0.127717	0.482458	chr6:125306571-125313885		49.7443	74.4567	-0.581871	5208	Non-regulated	No eCLIP peak	137100	1002	Non-regulated
Aff3	-1.50317	0.000161528	0.00897705	chr1:38175991-38664956		1830	2751.66	-0.588457	481619	Downregulated	eCLIP Peak	128418	1003	Downregulated with peak
Fam189a2	-1.5031	0.0763911	0.358131	chr19:23972751-24031019		104.285	156.775	-0.588164	55722	Non-regulated	No eCLIP peak	123628	1004	Non-regulated
Brd4	-1.50306	0.0123018	0.121455	chr17:32196272-32284723		1401.74	2107.16	-0.588084	81914	Non-regulated	eCLIP Peak	124141	1005	Non-regulated
Serinc5	-1.50296	0.0354049	0.228366	chr13:92611090-92711944		103.167	155.624	-0.593082	95491	Non-regulated	No eCLIP peak	125703	1006	Non-regulated
Fgd3	-1.50277	0.0784253	0.363329	chr13:49261556-49320313		101.735	153.27	-0.59126	42989	Non-regulated	No eCLIP peak	129968	1007	Non-regulated
Gm16894	-1.5026	0.0518281	0.284796	chr1:40076212-40085853		65.0002	97.3216	-0.582316	8782	Non-regulated	No eCLIP peak	126355	1008	Non-regulated
Plxnc1	-1.50241	0.06848	0.335859	chr10:94790866-94944845		744.097	1117.74	-0.587021	146668	Non-regulated	No eCLIP peak	125778	1009	Non-regulated
Serpina3n	-1.50232	0.292111	0.724971	chr12:104406708-104414329		1395.07	2095.84	-0.587195	5537	Non-regulated	No eCLIP peak	125577	1010	Non-regulated
Atm	-1.50138	0.0493774	0.278125	chr9:53437122-53536674		164.92	247.714	-0.586909	87586	Non-regulated	No eCLIP peak	124456	1011	Non-regulated
Itpka	-1.50121	0.634163	0.905642	chr2:119742337-119751253		1134.23	1702.74	-0.586141	7109	Non-regulated	No eCLIP peak	126859	1012	Non-regulated
Etv6	-1.5012	0.0232157	0.177854	chr6:134035697-134270145		71.4976	107.493	-0.588279	228752	Non-regulated	eCLIP Peak	123978	1013	Non-regulated
Cep95	-1.50116	0.0273046	0.196615	chr11:106788637-106818860		112.865	168.807	-0.580782	27012	Non-regulated	No eCLIP peak	133957	1014	Non-regulated
Ctdsp1	-1.5007	0.101305	0.424127	chr1:74391599-74397266		30.9471	46.8397	-0.597928	2901	Non-regulated	No eCLIP peak	123512	1015	Non-regulated
Nf1	-1.50029	0.00418091	0.0627018	chr11:79339886-79581609		3991.54	5988.06	-0.585143	229871	Non-regulated	No eCLIP peak	126806	1016	Non-regulated
Mmp16	-1.50003	0.0563127	0.298892	chr4:17852891-18118734		72.4232	108.778	-0.586868	260677	Non-regulated	No eCLIP peak	123703	1017	Non-regulated
Cage1	-1.50002	0.283288	0.713454	chr13:38006054-38037069		23.8822	36.1429	-0.59778	28028	Non-regulated	No eCLIP peak	124273	1018	Non-regulated
Tmtc1	-1.49993	0.0152489	0.138116	chr6:148232430-148444355		1583.04	2374.08	-0.584677	203577	Non-regulated	No eCLIP peak	126350	1019	Non-regulated
Ago1	-1.49936	0.000844479	0.0245818	chr4:126435012-126468631		1111.73	1666.92	-0.584372	26345	Non-regulated	No eCLIP peak	123069	1020	Non-regulated
Asxl1	-1.49888	1.49299e-05	0.0020572	chr2:153345830-153404006		2504.41	3754.27	-0.584063	51198	Non-regulated	No eCLIP peak	123162	1021	Non-regulated
Hps1	-1.49872	0.09641	0.411357	chr19:42755105-42779978		68.1227	102.059	-0.583194	22027	Non-regulated	No eCLIP peak	123210	1022	Non-regulated
Ankrd6	-1.49871	0.0278333	0.198796	chr4:32804035-32950826		341.912	512.725	-0.584559	142453	Non-regulated	eCLIP Peak	124818	1023	Non-regulated
Sema5b	-1.49859	0.00104415	0.0278035	chr16:35541144-35664732		947.771	1421.17	-0.584473	118254	Non-regulated	eCLIP Peak	123526	1024	Non-regulated
Camsap1	-1.49852	0.00078081	0.0234644	chr2:25926838-25983284		1131.88	1696.65	-0.583968	48467	Non-regulated	No eCLIP peak	124693	1025	Non-regulated
Ctnnd2	-1.49839	0.000935425	0.0258916	chr15:30172534-31029311		4192.18	6281.11	-0.583319	850805	Non-regulated	eCLIP Peak	126917	1026	Non-regulated
Ankrd17	-1.4983	0.0051172	0.0702341	chr5:90227166-90366187		5551.51	8317.59	-0.583285	128954	Non-regulated	No eCLIP peak	119117	1027	Non-regulated
Baz2a	-1.49774	0.0182224	0.153676	chr10:128091576-128129303		806.09	1207.53	-0.583047	29311	Non-regulated	eCLIP Peak	126352	1028	Non-regulated
Pitpnm2	-1.49643	0.00152335	0.0348244	chr5:124118689-124249760		2186.19	3272.23	-0.581855	124119	Non-regulated	eCLIP Peak	138364	1029	Non-regulated
Fhod3	-1.49594	0.0104869	0.109861	chr18:24708619-25133505		2817.54	4215.17	-0.581155	418648	Non-regulated	eCLIP Peak	137970	1030	Non-regulated
Dennd5b	-1.49583	0.0180325	0.152751	chr6:148988069-149101680		1430.94	2140.14	-0.580745	103779	Non-regulated	No eCLIP peak	133778	1031	Non-regulated
Acvr2b	-1.49566	0.00164465	0.0360384	chr9:119402178-119442148		1532.77	2292.43	-0.580738	29377	Non-regulated	eCLIP Peak	132945	1032	Non-regulated
Mfhas1	-1.49541	0.000249032	0.0115741	chr8:35587789-35679449		2241.09	3350.96	-0.580376	85244	Non-regulated	eCLIP Peak	133472	1033	Non-regulated
Tom1l1	-1.49488	0.122919	0.471434	chr11:90643463-90687604		47.3209	71.1954	-0.589306	39835	Non-regulated	No eCLIP peak	131029	1034	Non-regulated
Abca3	-1.49468	0.0224685	0.174483	chr17:24352023-24410203		320.03	479.046	-0.581955	51703	Non-regulated	No eCLIP peak	127122	1035	Non-regulated
Smarcc2	-1.49455	0.00379342	0.0592269	chr10:128459236-128490591		9001.42	13453.4	-0.579746	30632	Non-regulated	No eCLIP peak	130250	1036	Non-regulated
Add2	-1.49422	0.0103007	0.108727	chr6:86028681-86124409		902.424	1348.96	-0.579968	87524	Non-regulated	No eCLIP peak	130949	1037	Non-regulated
Ptprm	-1.49411	0.0213181	0.168507	chr17:66666848-67354491		418.923	625.657	-0.578686	681941	Non-regulated	eCLIP Peak	130109	1038	Non-regulated
Mphosph9	-1.49379	0.199709	0.613235	chr5:124250961-124327974		44.6702	66.6938	-0.57824	69267	Non-regulated	No eCLIP peak	123445	1039	Non-regulated
Hook1	-1.49359	0.0566802	0.299881	chr4:95967297-96025411		137.72	205.214	-0.575389	52657	Non-regulated	No eCLIP peak	129708	1040	Non-regulated
Arnt2	-1.49266	0.000803854	0.0238167	chr7:84246275-84410038		4399.3	6567.07	-0.577974	157691	Non-regulated	eCLIP Peak	123131	1041	Non-regulated
Cdan1	-1.49246	0.00202432	0.0409984	chr2:120716149-120731519		276.933	413.749	-0.579218	123897	Non-regulated	No eCLIP peak	130562	1042	Non-regulated
Wdr81	-1.49212	0.000944876	0.0260193	chr11:75440944-75454717		900.844	1344.82	-0.578058	6866	Non-regulated	No eCLIP peak	123114	1043	Non-regulated
Lamb1	-1.49208	0.0554512	0.296611	chr12:31265292-31329644		395.623	590.19	-0.577054	58568	Non-regulated	No eCLIP peak	121656	1044	Non-regulated
Tut4	-1.49153	0.0165174	0.144747	chr4:108459410-108559415		475.592	708.934	-0.575927	93936	Non-regulated	No eCLIP peak	129724	1045	Non-regulated
Farp1	-1.49129	0.0316318	0.213499	chr14:121035574-121285637		207.859	310.755	-0.580171	243296	Non-regulated	eCLIP Peak	133355	1046	Non-regulated
Scaf4	-1.49115	0.00752737	0.0892253	chr16:90228951-90284503		604.292	900.911	-0.57614	51180	Non-regulated	No eCLIP peak	128475	1047	Non-regulated
Krba1	-1.48961	0.00427051	0.0632635	chr6:48395585-48420353		568.819	847.572	-0.575367	17265	Non-regulated	eCLIP Peak	130183	1048	Non-regulated
Sema4d	-1.48931	5.31545e-05	0.00439067	chr13:51685529-51793678		788.34	1174.75	-0.575465	88020	Non-regulated	eCLIP Peak	130492	1049	Non-regulated
Mdga1	-1.48845	0.00549547	0.0734762	chr17:29827956-29970087		3311.67	4929.59	-0.573912	134133	Non-regulated	eCLIP Peak	131732	1050	Non-regulated
Arid2	-1.48842	0.0144775	0.133887	chr15:96287521-96405463		236.598	352.5	-0.575187	108913	Non-regulated	eCLIP Peak	132161	1051	Non-regulated
Gm14325	-1.48721	0.0448197	0.262772	chr2:177828991-177840336		1433.52	2131.77	-0.572491	6952	Non-regulated	No eCLIP peak	128978	1052	Non-regulated
Gadd45g	-1.48721	0.0896374	0.393844	chr13:51846670-51848475		268.709	399.477	-0.572067	720	Non-regulated	No eCLIP peak	119175	1053	Non-regulated
Tmem81	-1.48668	0.00910738	0.100429	chr1:132506229-132508652		148.963	220.942	-0.568713	668	Non-regulated	No eCLIP peak	123943	1054	Non-regulated
Frmpd4	-1.48666	0.0520451	0.285599	chrX:167471306-168577234		1971.6	2931.15	-0.572101	1097316	Non-regulated	eCLIP Peak	129520	1055	Non-regulated
Cdk6	-1.48619	0.00798769	0.0926769	chr5:3343891-3531003		370.679	551.448	-0.573056	175591	Non-regulated	No eCLIP peak	130557	1056	Non-regulated
Cacna2d2	-1.48549	0.018949	0.157465	chr9:107399612-107529343		326.352	484.857	-0.571127	123949	Non-regulated	eCLIP Peak	120560	1057	Non-regulated
Mical2	-1.48543	0.00237873	0.0450278	chr7:112225836-112355194		4999.15	7426.14	-0.570929	122670	Non-regulated	eCLIP Peak	120249	1058	Non-regulated
Jph3	-1.48474	0.000602266	0.0199411	chr8:121730588-121794276		3940.94	5852.22	-0.570445	60858	Non-regulated	eCLIP Peak	119425	1059	Non-regulated
Itga3	-1.48424	0.00219031	0.0429808	chr11:95044476-95076811		1211.26	1797.92	-0.569823	27631	Non-regulated	No eCLIP peak	119841	1060	Non-regulated
Zfp937	-1.48384	0.054098	0.292647	chr2:150218099-150244874		121.439	180.193	-0.569302	19856	Non-regulated	No eCLIP peak	123340	1061	Non-regulated
Zfp658	-1.48348	0.0078334	0.0913433	chr7:43562369-43575461		250.529	371.765	-0.569414	9711	Non-regulated	No eCLIP peak	120143	1062	Non-regulated
Ncapd2	-1.48276	0.0476264	0.271923	chr6:125168009-125191616		275.411	407.67	-0.565816	19066	Non-regulated	eCLIP Peak	114867	1063	Non-regulated
Pik3c2b	-1.48275	0.0324973	0.217342	chr1:133046010-133108688		697.173	1033.96	-0.568585	54748	Non-regulated	No eCLIP peak	123992	1064	Non-regulated
Mink1	-1.4824	0.000311788	0.0131001	chr11:70562881-70614482		8722.39	12931	-0.568036	46608	Non-regulated	eCLIP Peak	124082	1065	Non-regulated
Nup155	-1.48181	0.105634	0.433894	chr15:8107555-8159857		193.614	286.65	-0.566104	44143	Non-regulated	No eCLIP peak	122455	1066	Non-regulated
Camkk1	-1.48163	0.000320334	0.0132826	chr11:73018988-73042063		2770.53	4104.76	-0.567138	19338	Non-regulated	No eCLIP peak	121886	1067	Non-regulated
Slc9a9	-1.48123	0.214473	0.635922	chr9:94669892-95230452		71.4947	105.96	-0.567605	557069	Non-regulated	eCLIP Peak	125988	1068	Non-regulated
Rgs14	-1.48104	0.677069	0.905642	chr13:55369732-55384687		1389.97	2058.62	-0.566619	12600	Non-regulated	No eCLIP peak	122289	1069	Non-regulated
Supt6	-1.48063	0.00461527	0.0659856	chr11:78206749-78246343		5602.49	8295.53	-0.566266	32754	Non-regulated	No eCLIP peak	122538	1070	Non-regulated
Exoc4	-1.48059	0.049276	0.277752	chr6:33249124-33973979		520.197	770.055	-0.565902	720071	Non-regulated	eCLIP Peak	121947	1071	Non-regulated
Wipf3	-1.48054	0.000556923	0.0189358	chr6:54429686-54503768		6245.36	9246.1	-0.566061	69749	Non-regulated	No eCLIP peak	122081	1072	Non-regulated
Eef2k	-1.48034	0.00090241	0.0254495	chr7:120842831-120907219		383.563	567.366	-0.564817	58040	Non-regulated	No eCLIP peak	114456	1073	Non-regulated
Plpp3	-1.48032	0.0519324	0.285185	chr4:105157261-105232767		91.9958	135.768	-0.561502	72259	Non-regulated	eCLIP Peak	113696	1074	Non-regulated
Adam19	-1.48008	0.00713923	0.0864433	chr11:46054501-46147347		1087.19	1609.14	-0.565688	84969	Non-regulated	No eCLIP peak	115271	1075	Non-regulated
Iqce	-1.47994	0.0911219	0.396916	chr5:140663505-140702378		99.3912	147.318	-0.567743	34515	Non-regulated	No eCLIP peak	126268	1076	Non-regulated
Gpr161	-1.47989	0.0391609	0.242196	chr1:165295766-165326745		190.658	282.528	-0.567404	24182	Non-regulated	No eCLIP peak	121149	1077	Non-regulated
Mlc1	-1.47836	0.00171287	0.0369555	chr15:88955883-88979036		201.072	296.818	-0.561867	20341	Non-regulated	No eCLIP peak	110364	1078	Non-regulated
Bcorl1	-1.47806	0.00365994	0.0580652	chrX:48341358-48408049		408.856	604.81	-0.564891	59246	Non-regulated	No eCLIP peak	114261	1079	Non-regulated
Tyk2	-1.47801	0.00996339	0.106355	chr9:21104068-21131275		280.85	415.212	-0.564048	22404	Non-regulated	No eCLIP peak	114513	1080	Non-regulated
Ppm1e	-1.47788	0.00839661	0.0958225	chr11:87226906-87359049		919.489	1358.85	-0.563479	125774	Non-regulated	No eCLIP peak	112696	1081	Non-regulated
Gpc1	-1.47747	0.00114621	0.0293092	chr1:92831644-92860779		983.389	1453.46	-0.563659	24959	Non-regulated	No eCLIP peak	112713	1082	Non-regulated
Mast2	-1.47735	0.000231033	0.0111184	chr4:116306760-116464223		5026.44	7426.36	-0.56312	151716	Non-regulated	eCLIP Peak	114863	1083	Non-regulated
Acsm4	-1.47704	0.543849	0.860483	chr7:119690025-119714566		132.248	195.353	-0.562837	22388	Non-regulated	No eCLIP peak	113517	1084	Non-regulated
Aff4	-1.47666	0.00201292	0.0409841	chr11:53350767-53421840		13280.3	19610.6	-0.562339	60899	Non-regulated	No eCLIP peak	114014	1085	Non-regulated
Dlgap3	-1.47663	0.0277647	0.198479	chr4:127168677-127237021		3959.05	5846.41	-0.562397	63935	Non-regulated	No eCLIP peak	114264	1086	Non-regulated
Kank1	-1.47569	0.202738	0.617967	chr19:25236974-25434498		41.2001	60.8985	-0.563761	191885	Non-regulated	eCLIP Peak	114308	1087	Non-regulated
Fry	-1.4756	0.00895597	0.0993659	chr5:150118667-150497754		7807.87	11521.7	-0.561354	227094	Non-regulated	eCLIP Peak	113133	1088	Non-regulated
Foxn2	-1.4756	0.122931	0.471434	chr17:88440704-88490533		52.0512	77.0272	-0.565436	44738	Non-regulated	No eCLIP peak	114528	1089	Non-regulated
Dzip1	-1.47554	0.0788605	0.364634	chr14:118872922-118925470		119.959	176.92	-0.560555	45051	Non-regulated	No eCLIP peak	116830	1090	Non-regulated
Pllp	-1.47293	0.19679	0.608069	chr8:94674895-94696244		104.441	154.166	-0.561792	19459	Non-regulated	eCLIP Peak	113062	1091	Non-regulated
Cntn3	-1.47276	0.0120006	0.119894	chr6:102162655-102579917		207.697	306.614	-0.561947	404504	Non-regulated	eCLIP Peak	113560	1092	Non-regulated
Gucy2g	-1.47196	0.52295	0.845315	chr19:55198099-55241252		394.301	580.451	-0.557876	39250	Non-regulated	No eCLIP peak	117410	1093	Non-regulated
Fam155a	-1.47135	0.0003149	0.0131259	chr8:9205902-9771157		4311.94	6344.85	-0.557249	561872	Non-regulated	No eCLIP peak	117626	1094	Non-regulated
Plcd3	-1.47119	0.00326605	0.0546713	chr11:103070296-103102732		246.994	363.413	-0.557131	28332	Non-regulated	No eCLIP peak	114290	1095	Non-regulated
Slc16a10	-1.47111	0.139725	0.508756	chr10:40033452-40142260		44.6594	66.227	-0.568455	103326	Non-regulated	No eCLIP peak	123602	1096	Non-regulated
Sltm	-1.47036	0.0476559	0.271923	chr9:70542715-70592237		503.511	740.165	-0.555822	45726	Non-regulated	No eCLIP peak	114716	1097	Non-regulated
Larp4b	-1.4702	0.0208696	0.166714	chr13:9093881-9174451		1998.4	2937.6	-0.555793	74750	Non-regulated	No eCLIP peak	114441	1098	Non-regulated
Crocc	-1.47015	0.00686615	0.0843908	chr4:141016638-141060545		272.823	401.924	-0.558957	37641	Non-regulated	eCLIP Peak	117226	1099	Non-regulated
Lrp6	-1.47006	0.124637	0.475091	chr6:134446476-134566913		170.302	250.192	-0.554943	111070	Non-regulated	No eCLIP peak	111003	1100	Non-regulated
Ubr5	-1.46968	0.0139994	0.13119	chr15:37967328-38078854		2192.09	3221.31	-0.555343	101754	Non-regulated	No eCLIP peak	111905	1101	Non-regulated
Dock3	-1.46967	0.00458851	0.0658511	chr9:106892821-107231909		1598.52	2349.6	-0.555682	330022	Non-regulated	No eCLIP peak	113799	1102	Non-regulated
Ncmap	-1.4682	0.201813	0.616481	chr4:135369577-135398229		76.9349	112.83	-0.552443	26646	Non-regulated	No eCLIP peak	111300	1103	Non-regulated
Taf3	-1.46804	0.0189775	0.157542	chr2:9914553-10048617		562.508	825.938	-0.554159	129253	Non-regulated	eCLIP Peak	109947	1104	Non-regulated
Utrn	-1.46799	0.0225648	0.174984	chr10:12381798-12869367		3263.47	4790.45	-0.553752	474185	Non-regulated	eCLIP Peak	116793	1105	Non-regulated
Ncl	-1.46795	0.00183574	0.0387199	chr1:86344719-86359455		3373.18	4951.91	-0.553878	6480	Non-regulated	No eCLIP peak	110131	1106	Non-regulated
Zfp738	-1.46794	0.00160825	0.0355867	chr13:67664216-67683547		708.784	1040	-0.553169	11568	Non-regulated	No eCLIP peak	114725	1107	Non-regulated
Car15	-1.46772	0.0176355	0.150438	chr16:17835276-17838214		76.1359	111.67	-0.552599	1806	Non-regulated	No eCLIP peak	110984	1108	Non-regulated
Ncoa2	-1.4677	0.00685892	0.0843439	chr1:13139107-13374083		7745.47	11368.1	-0.553566	226919	Non-regulated	eCLIP Peak	115711	1109	Non-regulated
Phf20	-1.46766	0.00118064	0.0298987	chr2:156196647-156309952		2246.91	3298.2	-0.553741	107574	Non-regulated	eCLIP Peak	116552	1110	Non-regulated
Bcl7a	-1.46754	0.000106208	0.00699644	chr5:123344448-123374992		7678.34	11268.9	-0.553476	25827	Non-regulated	No eCLIP peak	113860	1111	Non-regulated
Brpf3	-1.46743	0.000876914	0.0250635	chr17:28801125-28838789		565.775	830.685	-0.554074	31691	Non-regulated	eCLIP Peak	108986	1112	Non-regulated
Shisa7	-1.46739	0.00155607	0.0351217	chr7:4825552-4844696		4115.12	6039.02	-0.553381	13138	Non-regulated	No eCLIP peak	114581	1113	Non-regulated
Rims1	-1.46705	0.0119337	0.119465	chr1:22285972-22806158		1934.24	2837.42	-0.552812	513520	Non-regulated	eCLIP Peak	114936	1114	Non-regulated
Prkg2	-1.4663	0.0408817	0.24871	chr5:98929701-99037351		153.75	225.562	-0.552936	102611	Non-regulated	eCLIP Peak	114768	1115	Non-regulated
Scn1a	-1.46621	0.00913441	0.100578	chr2:66270782-66440852		4937.16	7238.58	-0.552026	161769	Non-regulated	No eCLIP peak	111182	1116	Non-regulated
Kri1	-1.46617	0.0274044	0.19693	chr9:21273458-21287970		494.621	725.092	-0.55184	11915	Non-regulated	No eCLIP peak	109931	1117	Non-regulated
Glp1r	-1.46579	0.14314	0.514892	chr17:30901840-30936535		55.7054	81.7819	-0.553963	33164	Non-regulated	No eCLIP peak	110316	1118	Non-regulated
Gcn1	-1.46573	0.00573767	0.0759423	chr5:115565260-115622654		780.868	1144.72	-0.551844	48846	Non-regulated	No eCLIP peak	109782	1119	Non-regulated
Luzp1	-1.46571	0.00410392	0.0621505	chr4:136469760-136549326		6903.65	10118.5	-0.551571	72121	Non-regulated	No eCLIP peak	109944	1120	Non-regulated
Ptpro	-1.46503	0.0464063	0.267453	chr6:137252299-137464631		444.152	650.841	-0.551251	205798	Non-regulated	eCLIP Peak	112496	1121	Non-regulated
Efna5	-1.46463	0.00250537	0.0463477	chr17:62602957-62881317		1889.73	2767.23	-0.550264	273102	Non-regulated	eCLIP Peak	110788	1122	Non-regulated
Diaph1	-1.46396	0.00310569	0.0530282	chr18:37843601-37935478		444.685	650.715	-0.549242	86210	Non-regulated	No eCLIP peak	103595	1123	Non-regulated
Ski	-1.46368	0.0095922	0.103898	chr4:155154076-155222535		1866.22	2731.79	-0.549727	62996	Non-regulated	eCLIP Peak	108113	1124	Non-regulated
Mysm1	-1.46358	0.0175796	0.150246	chr4:94942040-94979102		748.08	1094.9	-0.549534	29641	Non-regulated	No eCLIP peak	103819	1125	Non-regulated
Nr3c2	-1.4634	0.00996261	0.106355	chr8:76902330-77245011		510.228	746.78	-0.549541	339325	Non-regulated	eCLIP Peak	106052	1126	Non-regulated
Sema4b	-1.46322	0.00949289	0.103246	chr7:80186839-80229247		171.278	251.004	-0.551371	35738	Non-regulated	No eCLIP peak	109640	1127	Non-regulated
Dab1	-1.46307	0.0881565	0.390139	chr4:103619358-104744844		204.111	298.627	-0.548992	1059481	Non-regulated	eCLIP Peak	103738	1128	Non-regulated
Klf7	-1.46286	0.00781563	0.0912042	chr1:64029463-64121426		370.129	541.465	-0.548838	84383	Non-regulated	eCLIP Peak	97417.9	1129	Non-regulated
Pard3	-1.46285	0.035239	0.227935	chr8:127064056-127612286		300.034	439.156	-0.549607	542416	Non-regulated	eCLIP Peak	111163	1130	Non-regulated
Hectd4	-1.4627	0.0270004	0.195121	chr5:121220219-121368576		1343.2	1965.09	-0.548921	132877	Non-regulated	No eCLIP peak	96565.1	1131	Non-regulated
Chrm1	-1.46246	0.561527	0.874725	chr19:8664002-8683600		1955.71	2860.17	-0.548411	13312	Non-regulated	No eCLIP peak	97103.4	1132	Non-regulated
Cep170	-1.46114	0.0130031	0.125359	chr1:176733653-176814067		649.812	949.418	-0.547022	73439	Non-regulated	No eCLIP peak	98880.1	1133	Non-regulated
Sptbn4	-1.46104	0.00143244	0.0337308	chr7:27356383-27447686		7336.82	10720.3	-0.54712	82563	Non-regulated	No eCLIP peak	97373.3	1134	Non-regulated
Rarg	-1.46017	0.0743991	0.353259	chr15:102234165-102257522		286.647	418.893	-0.547309	19627	Non-regulated	No eCLIP peak	97451.9	1135	Non-regulated
Egr4	-1.45983	0.489789	0.845039	chr6:85511122-85513589		443.175	646.986	-0.545859	321	Non-regulated	No eCLIP peak	98445.1	1136	Non-regulated
Kcnip3	-1.45968	0.00287972	0.0507197	chr2:127456498-127522095		2040.69	2978.88	-0.545712	62145	Non-regulated	eCLIP Peak	99717.3	1137	Non-regulated
Trim67	-1.45947	0.0128993	0.12481	chr8:124793018-124837373		1248.14	1821.57	-0.545397	35917	Non-regulated	No eCLIP peak	99474.2	1138	Non-regulated
Kif1a	-1.45946	0.0370424	0.234014	chr1:93015455-93101874		3731.66	5446.66	-0.545552	78153	Non-regulated	eCLIP Peak	99206.9	1139	Non-regulated
Arhgap33	-1.45939	0.174478	0.572116	chr7:30522226-30535061		5962.5	8701.8	-0.545396	8498	Non-regulated	No eCLIP peak	99980.3	1140	Non-regulated
Kcng1	-1.45938	0.00634354	0.0810052	chr2:168260117-168281533		2292.93	3347.31	-0.545811	16927	Non-regulated	No eCLIP peak	98952.3	1141	Non-regulated
Zfp809	-1.45926	0.0800151	0.367671	chr9:22225703-22243352		106.019	154.445	-0.542772	16159	Non-regulated	No eCLIP peak	92511.2	1142	Non-regulated
Plagl1	-1.45905	0.00376518	0.0591078	chr10:13090683-13131694		521.194	759.388	-0.543018	65614	Non-regulated	No eCLIP peak	93126.5	1143	Non-regulated
Stc2	-1.45874	0.00524897	0.0712369	chr11:31357986-31370061		437.768	638.893	-0.545409	8828	Non-regulated	No eCLIP peak	98492.5	1144	Non-regulated
Dlgap2	-1.45835	0.0262815	0.191955	chr8:14095874-14847684		514.923	751.27	-0.544975	747303	Non-regulated	eCLIP Peak	103154	1145	Non-regulated
Rassf1	-1.4583	0.0530182	0.288935	chr9:107551555-107562267		115.208	168.395	-0.547612	8926	Non-regulated	eCLIP Peak	97340.6	1146	Non-regulated
Usp34	-1.45767	0.00603968	0.078588	chr11:23306894-23490560		3212.16	4681.94	-0.54356	171466	Non-regulated	No eCLIP peak	96173.4	1147	Non-regulated
Fam81b	-1.45699	0.548144	0.864075	chr13:76201708-76271944		76.2166	111.081	-0.543435	100605	Non-regulated	No eCLIP peak	95870.9	1148	Non-regulated
Rapgef2	-1.45692	0.0101924	0.107923	chr3:79062511-79145875		1920.96	2798.88	-0.543021	217023	Non-regulated	eCLIP Peak	95217.9	1149	Non-regulated
Hcfc1	-1.45691	0.00948217	0.103223	chrX:73942792-73966976		5919.76	8624.81	-0.542955	15428	Non-regulated	No eCLIP peak	92502.9	1150	Non-regulated
Sipa1l3	-1.4564	0.00224707	0.0436731	chr7:29320372-29518950		618.2	901.209	-0.543787	177370	Non-regulated	eCLIP Peak	97880.3	1151	Non-regulated
Ubash3b	-1.45625	0.0101383	0.10753	chr9:41012421-41158062		3603.75	5247.45	-0.542119	140611	Non-regulated	eCLIP Peak	93806.9	1152	Non-regulated
Ypel2	-1.45622	2.10773e-05	0.0026184	chr11:86936425-86993762		15683.2	22838.2	-0.542231	52436	Non-regulated	eCLIP Peak	93924.3	1153	Non-regulated
Ehd4	-1.45612	0.0031679	0.0534819	chr2:120089176-120154586		981.809	1429.75	-0.542246	61702	Non-regulated	No eCLIP peak	93322.9	1154	Non-regulated
Synj2	-1.4556	0.0067827	0.0840288	chr17:5941278-6044290		996.963	1451.48	-0.541914	92480	Non-regulated	No eCLIP peak	93005.2	1155	Non-regulated
Mzf1	-1.45511	0.029552	0.204907	chr7:13042303-13054764		181.672	264.793	-0.543531	8865	Non-regulated	No eCLIP peak	95216.3	1156	Non-regulated
Kndc1	-1.4541	0.00481231	0.0676984	chr7:139894695-139941540		690.599	1004.53	-0.540604	39543	Non-regulated	No eCLIP peak	92885.8	1157	Non-regulated
Cyp26b1	-1.45408	0.157701	0.543818	chr6:84571414-84593908		62.8063	90.8377	-0.532383	17795	Non-regulated	No eCLIP peak	107707	1158	Non-regulated
Clip2	-1.45396	0.00385313	0.0598041	chr5:134489384-134552434		8586.25	12485.1	-0.540105	58159	Non-regulated	No eCLIP peak	91847.6	1159	Non-regulated
Rere	-1.45357	0.00507007	0.069811	chr4:150281916-150621966		1012.62	1472.27	-0.539951	332593	Non-regulated	eCLIP Peak	91970.7	1160	Non-regulated
Jph4	-1.45348	0.539933	0.857858	chr14:55106826-55116935		654.43	951.254	-0.539591	5621	Non-regulated	No eCLIP peak	89269.9	1161	Non-regulated
Tbc1d8	-1.45331	0.0133532	0.127719	chr1:39371495-39478755		559.772	814.144	-0.540444	102813	Non-regulated	No eCLIP peak	92732.1	1162	Non-regulated
Pikfyve	-1.45283	0.0600369	0.310711	chr1:65186682-65278696		139.076	202.188	-0.539829	80757	Non-regulated	No eCLIP peak	89433.8	1163	Non-regulated
Fam83h	-1.45258	0.161929	0.552141	chr15:76001093-76014336		48.7102	71.0759	-0.545138	8742	Non-regulated	No eCLIP peak	102865	1164	Non-regulated
Pibf1	-1.45256	0.0875768	0.388227	chr14:99099423-99254493		160.794	233.461	-0.53797	151790	Non-regulated	eCLIP Peak	91990.1	1165	Non-regulated
Rexo1	-1.45209	0.000307001	0.0130028	chr10:80540922-80561560		1104.07	1604.19	-0.539018	15386	Non-regulated	No eCLIP peak	89731.9	1166	Non-regulated
Ccnd1	-1.45131	0.394862	0.793776	chr7:144929931-144939925		193.615	281.047	-0.537619	6199	Non-regulated	No eCLIP peak	89858.6	1167	Non-regulated
Rasal2	-1.44992	0.0394514	0.243269	chr1:157135183-157412595		139.473	202.497	-0.537908	267367	Non-regulated	No eCLIP peak	91118.5	1168	Non-regulated
Dok3	-1.44974	0.384323	0.793776	chr13:55523230-55528858		20.0492	28.8668	-0.52587	4418	Non-regulated	No eCLIP peak	103980	1169	Non-regulated
Ppargc1b	-1.44973	0.0754102	0.35593	chr18:61291445-61400431		466.048	675.952	-0.536443	98640	Non-regulated	eCLIP Peak	103885	1170	Non-regulated
Evi5l	-1.44944	0.00256437	0.0472917	chr8:4166565-4211257		943.724	1368.32	-0.535973	37721	Non-regulated	No eCLIP peak	104554	1171	Non-regulated
Ahdc1	-1.44934	0.00272545	0.049086	chr4:133011506-133079947		2005.29	2907.58	-0.536007	60003	Non-regulated	eCLIP Peak	104156	1172	Non-regulated
Dcx	-1.44775	0.0585231	0.305684	chrX:143855843-143933316		107.595	156.134	-0.537166	68396	Non-regulated	No eCLIP peak	90045.6	1173	Non-regulated
C130046K22Rik	-1.44696	0.0157723	0.141146	chr11:103697723-103725573		478.866	693.784	-0.534865	24382	Non-regulated	No eCLIP peak	104332	1174	Non-regulated
Ndst1	-1.44687	0.000126144	0.0076982	chr18:60684495-60748666		4373.57	6328.55	-0.533063	56210	Non-regulated	No eCLIP peak	105359	1175	Non-regulated
Smg7	-1.44667	0.0260425	0.190749	chr1:152836995-152902646		3242.82	4691.31	-0.532742	59861	Non-regulated	No eCLIP peak	105998	1176	Non-regulated
Cygb	-1.44658	0.00669956	0.0835833	chr11:116645595-116654314		763.23	1104.49	-0.533191	6388	Non-regulated	eCLIP Peak	105200	1177	Non-regulated
Utp20	-1.44644	0.122084	0.469573	chr10:88745868-88826814		68.9499	99.3778	-0.527376	71377	Non-regulated	No eCLIP peak	102150	1178	Non-regulated
Map3k11	-1.44612	0.00144057	0.033838	chr19:5689131-5702862		1087.45	1572.96	-0.532528	9931	Non-regulated	No eCLIP peak	107733	1179	Non-regulated
Mgat5b	-1.44594	0.00069256	0.0216796	chr11:116918863-116986945		3265.79	4722.45	-0.532105	63828	Non-regulated	eCLIP Peak	108679	1180	Non-regulated
Srp54b	-1.44555	0.0103816	0.109068	chr12:55155103-55189575		3632.65	5249.74	-0.531224	30824	Non-regulated	No eCLIP peak	112396	1181	Non-regulated
Rtp1	-1.44549	0.526937	0.848457	chr16:23429132-23433960		1260.32	1821.86	-0.531627	1708	Non-regulated	No eCLIP peak	109691	1182	Non-regulated
Otop3	-1.44495	0.0908869	0.396275	chr11:115334731-115346926		94.3947	135.999	-0.526823	9828	Non-regulated	No eCLIP peak	104154	1183	Non-regulated
Trp73	-1.44423	0.00860161	0.0973089	chr4:154056249-154140209		353.606	511.34	-0.532139	78914	Non-regulated	No eCLIP peak	108866	1184	Non-regulated
Arhgef40	-1.44422	0.00745738	0.0886959	chr14:51984832-52006247		330.569	477.615	-0.530894	15793	Non-regulated	No eCLIP peak	113960	1185	Non-regulated
Megf8	-1.44417	0.00450903	0.065252	chr7:25317164-25365917		1524.13	2201.6	-0.530565	38714	Non-regulated	No eCLIP peak	113158	1186	Non-regulated
Card10	-1.44409	0.0687622	0.336536	chr15:78775138-78803042		281.055	406.153	-0.53117	23179	Non-regulated	No eCLIP peak	116072	1187	Non-regulated
Pitpnm3	-1.4436	0.00594279	0.0777459	chr11:72047530-72135889		980.138	1415.38	-0.530134	81696	Non-regulated	No eCLIP peak	113290	1188	Non-regulated
C1qb	-1.44352	0.154349	0.537209	chr4:136880126-136886200		44.1027	63.8037	-0.532773	4971	Non-regulated	No eCLIP peak	105302	1189	Non-regulated
Zfp423	-1.44342	0.00147934	0.0343735	chr8:87661812-87959571		1463.85	2113.54	-0.529888	292879	Non-regulated	eCLIP Peak	113258	1190	Non-regulated
Pds5a	-1.44318	0.0262186	0.191642	chr5:65605719-65698236		202.303	292.01	-0.529497	83514	Non-regulated	No eCLIP peak	110587	1191	Non-regulated
Supt20	-1.44309	0.0460311	0.266863	chr3:54692815-54728763		155.591	224	-0.525736	32242	Non-regulated	eCLIP Peak	104529	1192	Non-regulated
Pde11a	-1.44307	0.0683925	0.335728	chr2:75985808-76338938		115.638	167.091	-0.531029	344674	Non-regulated	No eCLIP peak	117273	1193	Non-regulated
Dclre1a	-1.4427	0.0190385	0.157718	chr19:56529161-56548222		233.759	337.633	-0.530435	14988	Non-regulated	No eCLIP peak	113082	1194	Non-regulated
Aph1b	-1.44266	0.00340061	0.0560328	chr9:66775209-66795491		5287.02	7625.9	-0.528452	15379	Non-regulated	No eCLIP peak	110091	1195	Non-regulated
Hook3	-1.44245	0.020106	0.162882	chr8:26021421-26119224		1189.3	1715.16	-0.528239	84968	Non-regulated	No eCLIP peak	105470	1196	Non-regulated
Magi1	-1.44224	0.0193136	0.158993	chr6:93675453-94283919		2811.74	4055.16	-0.528298	600534	Non-regulated	eCLIP Peak	111164	1197	Non-regulated
Taf1	-1.44192	0.0597298	0.309833	chrX:101532735-101601789		469.344	676.621	-0.527701	60995	Non-regulated	No eCLIP peak	104772	1198	Non-regulated
Wdr19	-1.44164	0.018341	0.154339	chr5:65199696-65260415		543.928	784.416	-0.528202	56317	Non-regulated	No eCLIP peak	105213	1199	Non-regulated
Fryl	-1.44158	0.174024	0.571211	chr5:73020191-73256620		2347.07	3383.45	-0.527637	224958	Non-regulated	eCLIP Peak	104350	1200	Non-regulated
Nr4a1	-1.44103	0.3559	0.78	chr15:101266846-101274795		861.107	1240.71	-0.526897	17974	Non-regulated	No eCLIP peak	104308	1201	Non-regulated
Myo9a	-1.44064	0.0752821	0.355713	chr9:59751174-59928866		167.891	241.645	-0.52536	165986	Non-regulated	No eCLIP peak	105240	1202	Non-regulated
Rhobtb1	-1.44063	0.0602797	0.311406	chr10:69208552-69291782		123.484	178.399	-0.530781	97789	Non-regulated	No eCLIP peak	113921	1203	Non-regulated
Arhgap32	-1.44028	0.00887821	0.0990255	chr9:32016625-32265882		1912.13	2754.12	-0.526412	138743	Non-regulated	eCLIP Peak	104237	1204	Non-regulated
Slc7a14	-1.44026	0.118788	0.463146	chr3:31202864-31310319		107.322	154.285	-0.523645	98624	Non-regulated	No eCLIP peak	94710.3	1205	Non-regulated
Ptprg	-1.43848	0.0149473	0.136238	chr14:11553553-12242041		645.18	928.128	-0.524623	679297	Non-regulated	eCLIP Peak	104684	1206	Non-regulated
Nr2f2	-1.43831	0.0938034	0.404469	chr7:70351950-70366746		148.825	214.324	-0.526182	10633	Non-regulated	eCLIP Peak	103560	1207	Non-regulated
Gabrb1	-1.43815	0.0364937	0.231975	chr5:71657921-72149572		1772.8	2549.28	-0.524057	449868	Non-regulated	eCLIP Peak	97962.4	1208	Non-regulated
Plcg1	-1.43757	0.00737669	0.0882016	chr2:160731300-160775760		410.71	590.494	-0.523805	40016	Non-regulated	eCLIP Peak	94944.2	1209	Non-regulated
Gripap1	-1.43721	0.00494932	0.0688825	chrX:7789992-7820567		2380.4	3421.44	-0.523398	27647	Non-regulated	No eCLIP peak	94576.3	1210	Non-regulated
Extl1	-1.43706	0.0150521	0.136911	chr4:134356374-134372549		552.477	794.388	-0.52393	22636	Non-regulated	No eCLIP peak	94633.9	1211	Non-regulated
Hcn4	-1.43704	0.011445	0.116421	chr9:58822949-58863157		776.491	1115.55	-0.52272	33646	Non-regulated	eCLIP Peak	94675.4	1212	Non-regulated
Dcaf17	-1.43694	0.0159014	0.141828	chr2:71055327-71099142		186.439	267.6	-0.521376	41457	Non-regulated	No eCLIP peak	96771.3	1213	Non-regulated
Larp7	-1.43688	0.0340573	0.223512	chr3:127536716-127553349		227.12	326.83	-0.525085	14515	Non-regulated	No eCLIP peak	104686	1214	Non-regulated
R3hdm2	-1.43679	0.000268756	0.0120803	chr10:127380668-127499383		8818.24	12669.4	-0.52279	114418	Non-regulated	eCLIP Peak	95442.3	1215	Non-regulated
Map4k4	-1.43677	0.0164936	0.144677	chr1:39900913-40026310		2393.83	3439.36	-0.52282	119616	Non-regulated	eCLIP Peak	96109.7	1216	Non-regulated
Eif4g1	-1.43578	0.0106844	0.111339	chr16:20672727-20692881		4838.15	6946.54	-0.52184	14718	Non-regulated	No eCLIP peak	95344.8	1217	Non-regulated
Phf2	-1.43551	0.00147048	0.0342684	chr13:48801750-48870885		898.75	1290.26	-0.521668	63876	Non-regulated	eCLIP Peak	97055.7	1218	Non-regulated
Hepacam	-1.43515	0.170954	0.565883	chr9:37367368-37386573		36.6964	52.7289	-0.522956	15878	Non-regulated	eCLIP Peak	95092.5	1219	Non-regulated
Iqsec1	-1.43489	0.000731567	0.0224704	chr6:90656091-90810123		4709.56	6757.64	-0.520927	324205	Non-regulated	eCLIP Peak	96512.9	1220	Non-regulated
2700049A03Rik	-1.43434	0.0131681	0.126409	chr12:71136848-71243303		292.063	418.662	-0.519505	100693	Non-regulated	No eCLIP peak	89921.8	1221	Non-regulated
Resf1	-1.4342	0.120583	0.466399	chr6:149309414-149335662		323.161	462.883	-0.518393	20170	Non-regulated	No eCLIP peak	85925.2	1222	Non-regulated
Pdzrn4	-1.43387	0.00692216	0.0847682	chr15:92396810-92771819		641.307	919.93	-0.520508	371054	Non-regulated	eCLIP Peak	93770	1223	Non-regulated
Ncapd3	-1.43383	0.0343975	0.224576	chr9:27030165-27095315		96.1526	137.172	-0.512594	59638	Non-regulated	No eCLIP peak	91724.7	1224	Non-regulated
Fam184a	-1.43382	0.03671	0.23277	chr10:53633145-53750910		4591.25	6582.71	-0.519796	113815	Non-regulated	No eCLIP peak	90323.7	1225	Non-regulated
Kcnk3	-1.43358	0.000783624	0.0235266	chr5:30588087-30625270		650.013	932.634	-0.520843	33291	Non-regulated	No eCLIP peak	93740.4	1226	Non-regulated
Nrgn	-1.4335	0.607106	0.905226	chr9:37544493-37552745		4878.33	6993.1	-0.519547	6960	Non-regulated	No eCLIP peak	89934.1	1227	Non-regulated
Acaca	-1.43325	0.0463518	0.267338	chr11:84129672-84401650		5443.54	7802.12	-0.519321	219017	Non-regulated	eCLIP Peak	87243.2	1228	Non-regulated
Unc5a	-1.43303	0.21851	0.642877	chr13:54949411-55006018		1159.11	1661.18	-0.519183	52613	Non-regulated	eCLIP Peak	85743.7	1229	Non-regulated
Ttf2	-1.43248	0.106043	0.434853	chr3:100938861-100969666		127.635	183.081	-0.52046	26263	Non-regulated	No eCLIP peak	90285.9	1230	Non-regulated
Castor2	-1.43245	0.00113901	0.0291723	chr5:134099719-134141756		1483.77	2125.64	-0.518631	37266	Non-regulated	eCLIP Peak	85754.8	1231	Non-regulated
Itga7	-1.43231	0.0501903	0.280302	chr10:128933813-128958282		108.593	155.908	-0.521771	20452	Non-regulated	eCLIP Peak	95600	1232	Non-regulated
Ssh2	-1.43217	0.0304894	0.209098	chr11:77216425-77460220		2029.91	2906.88	-0.518059	234756	Non-regulated	eCLIP Peak	90047.9	1233	Non-regulated
A730036I17Rik	-1.43217	0.0405891	0.247663	chr2:129218968-129235606		148.721	213.471	-0.521432	13205	Non-regulated	No eCLIP peak	96561	1234	Non-regulated
9930104L06Rik	-1.43207	0.0234866	0.179052	chr4:124937048-124944661		215.668	309.374	-0.520542	2842	Non-regulated	No eCLIP peak	93560.6	1235	Non-regulated
Tchp	-1.43193	0.0191872	0.158573	chr5:114707779-114722326		543.929	778.93	-0.518076	11686	Non-regulated	No eCLIP peak	86221.8	1236	Non-regulated
Ercc5	-1.43181	0.0359847	0.230013	chr1:44147744-44181260		544.429	779.402	-0.517623	29507	Non-regulated	No eCLIP peak	91886.7	1237	Non-regulated
Crtc1	-1.43115	0.0022277	0.0434808	chr8:70382355-70439579		1841.85	2636.68	-0.517566	51542	Non-regulated	No eCLIP peak	93363.7	1238	Non-regulated
Cspp1	-1.4311	0.0349955	0.226884	chr1:10037987-10136768		97.411	139.438	-0.517464	94197	Non-regulated	eCLIP Peak	92957.9	1239	Non-regulated
Mbp	-1.43085	0.000949516	0.0260389	chr18:82475123-82585643		3081.3	4408.95	-0.516898	107984	Non-regulated	eCLIP Peak	94415.1	1240	Non-regulated
Prkab2	-1.43073	0.00276192	0.0495223	chr3:97658212-97673105		1649.56	2361.09	-0.51737	10595	Non-regulated	No eCLIP peak	92719.9	1241	Non-regulated
Ccdc148	-1.43041	0.157384	0.543474	chr2:58821697-59160683		80.187	114.943	-0.519482	334982	Non-regulated	eCLIP Peak	90024	1242	Non-regulated
Sfrp2	-1.4302	0.0163319	0.143788	chr3:83766314-83774315		207.421	296.811	-0.516982	5993	Non-regulated	No eCLIP peak	93089	1243	Non-regulated
Phactr3	-1.43009	0.246267	0.678191	chr2:178118975-178338492		715.126	1022.73	-0.516157	214660	Non-regulated	eCLIP Peak	92741.4	1244	Non-regulated
Adcy3	-1.42976	0.00465926	0.0663739	chr12:4133397-4213524		2976.42	4255.99	-0.515914	74802	Non-regulated	eCLIP Peak	92931.2	1245	Non-regulated
2410004P03Rik	-1.42952	0.421505	0.811326	chr12:17004958-17011727		155.16	221.898	-0.516141	4972	Non-regulated	No eCLIP peak	90775.1	1246	Non-regulated
Iqsec2	-1.42886	0.00231748	0.0444498	chrX:152144268-152225237		2516.38	3596.21	-0.515127	74975	Non-regulated	eCLIP Peak	92812.3	1247	Non-regulated
Sbf2	-1.42833	0.117673	0.460734	chr7:110308013-110614924		141.651	202.596	-0.516265	299820	Non-regulated	eCLIP Peak	93064.6	1248	Non-regulated
Metap1d	-1.42808	0.0100992	0.107225	chr2:71453331-71525166		230.083	327.786	-0.510601	70595	Non-regulated	No eCLIP peak	93390.3	1249	Non-regulated
Nxph3	-1.42804	0.0575504	0.302175	chr11:95509846-95514567		629.195	898.599	-0.51417	2627	Non-regulated	No eCLIP peak	92578.8	1250	Non-regulated
Ccdc33	-1.42787	0.307848	0.743501	chr9:58028674-58118825		69.4555	99.3562	-0.516522	87029	Non-regulated	No eCLIP peak	93839.1	1251	Non-regulated
Aff1	-1.42722	0.0235078	0.179084	chr5:103692419-103855321		1781.2	2541.91	-0.513063	122442	Non-regulated	eCLIP Peak	93106.1	1252	Non-regulated
Smc3	-1.42719	0.00885396	0.0989121	chr19:53600395-53645831		1818.62	2594.83	-0.512791	40585	Non-regulated	No eCLIP peak	91941.5	1253	Non-regulated
Cul9	-1.42688	0.0379519	0.237323	chr17:46500609-46546388		252.187	360.681	-0.516229	37966	Non-regulated	eCLIP Peak	92681.2	1254	Non-regulated
Jph1	-1.4267	0.479605	0.845039	chr1:16994938-17097889		135.687	193.663	-0.513267	98143	Non-regulated	No eCLIP peak	93375.8	1255	Non-regulated
Slc37a1	-1.42652	0.0836073	0.377458	chr17:31295483-31350696		140.012	199.393	-0.510065	52285	Non-regulated	No eCLIP peak	95218.5	1256	Non-regulated
Bicdl1	-1.42586	0.0745344	0.353769	chr5:115648175-115731621		138.431	197.483	-0.512559	80421	Non-regulated	No eCLIP peak	91172.4	1257	Non-regulated
Aqp4	-1.42507	0.281224	0.711188	chr18:15389394-15411015		34.4332	49.166	-0.513864	16266	Non-regulated	No eCLIP peak	93155.8	1258	Non-regulated
Zmynd11	-1.42458	0.00270597	0.0488748	chr13:9684838-9765321		2726.17	3883.7	-0.510556	76365	Non-regulated	No eCLIP peak	92783.6	1259	Non-regulated
Polr1a	-1.42433	0.0360947	0.230465	chr6:71909052-71985206		661.626	942.449	-0.510398	64199	Non-regulated	eCLIP Peak	94347.1	1260	Non-regulated
Incenp	-1.42417	0.0652476	0.327135	chr19:9872295-9899490		302.637	431.702	-0.512445	24020	Non-regulated	No eCLIP peak	90449.3	1261	Non-regulated
Hdac4	-1.42408	0.00124238	0.0309652	chr1:91928779-92180343		3904.49	5560.39	-0.510051	243463	Non-regulated	eCLIP Peak	94776.7	1262	Non-regulated
Ptprj	-1.42364	0.018691	0.155861	chr2:90429756-90580595		674.938	960.709	-0.509345	140125	Non-regulated	eCLIP Peak	93447.1	1263	Non-regulated
Taf4	-1.42353	0.0992739	0.419287	chr2:179912146-179976646		104.595	148.536	-0.505996	60079	Non-regulated	eCLIP Peak	75612	1264	Non-regulated
Zfp334	-1.42341	0.173924	0.571191	chr2:165377433-165388259		77.6984	110.989	-0.514457	5791	Non-regulated	eCLIP Peak	92239.7	1265	Non-regulated
Rbfox1	-1.42324	0.108327	0.440144	chr16:5884793-7412480		1007.09	1433.39	-0.509242	1466187	Non-regulated	eCLIP Peak	93374.5	1266	Non-regulated
Exd1	-1.42264	0.123308	0.472126	chr2:119516511-119547629		112.323	159.87	-0.509251	25081	Non-regulated	No eCLIP peak	93114.6	1267	Non-regulated
Ky	-1.42254	0.119421	0.464238	chr9:102505747-102546244		69.8113	99.751	-0.514871	34653	Non-regulated	No eCLIP peak	92195.1	1268	Non-regulated
Elovl6	-1.42243	0.0416612	0.25169	chr3:129532366-129638495		9491.51	13500.8	-0.508332	100159	Non-regulated	eCLIP Peak	78078	1269	Non-regulated
Golga2	-1.4221	0.00658771	0.0829115	chr2:32288251-32307913		3988.59	5672.47	-0.508097	15308	Non-regulated	eCLIP Peak	77215.9	1270	Non-regulated
Zc3h12c	-1.42187	0.038487	0.239306	chr9:52109569-52168406		1370.63	1947.77	-0.506981	50465	Non-regulated	No eCLIP peak	78221.7	1271	Non-regulated
Matn2	-1.42173	0.191067	0.599766	chr15:34306679-34436274		107.498	152.975	-0.508989	126042	Non-regulated	No eCLIP peak	79175.4	1272	Non-regulated
Mta3	-1.42164	0.00217192	0.0428597	chr17:83706163-83824950		2269.76	3226.91	-0.50761	112046	Non-regulated	eCLIP Peak	77287.9	1273	Non-regulated
Rab11fip3	-1.42089	0.00211398	0.0422715	chr17:25989036-26069547		3139.41	4460.91	-0.506841	75262	Non-regulated	eCLIP Peak	78127.1	1274	Non-regulated
Ankrd44	-1.42078	0.423659	0.813642	chr1:54645342-54926388		38.0387	53.9982	-0.505442	274908	Non-regulated	eCLIP Peak	74666.2	1275	Non-regulated
Pop4	-1.42078	0.0393628	0.243111	chr7:38261996-38271380		537.226	763.039	-0.506228	7315	Non-regulated	No eCLIP peak	76627.4	1276	Non-regulated
Whamm	-1.42076	0.00196813	0.0404312	chr7:81571164-81596836		364.515	518.035	-0.507071	22476	Non-regulated	No eCLIP peak	78385.8	1277	Non-regulated
1700025G04Rik	-1.42066	0.0251522	0.186566	chr1:151884524-152090320		1288.79	1830.82	-0.50647	235020	Non-regulated	eCLIP Peak	77961.5	1278	Non-regulated
Myrip	-1.42026	0.00366014	0.0580652	chr9:120303955-120474834		1107.1	1571.61	-0.505454	166000	Non-regulated	eCLIP Peak	75446	1279	Non-regulated
Hmbox1	-1.42018	0.0347325	0.225824	chr14:64811600-64949857		10083.3	14319.7	-0.506037	134855	Non-regulated	eCLIP Peak	76760.8	1280	Non-regulated
Sncaip	-1.42014	0.133965	0.495909	chr18:52767708-52915931		119.797	169.978	-0.504758	144497	Non-regulated	No eCLIP peak	68649.5	1281	Non-regulated
Rffl	-1.41958	0.184114	0.588724	chr11:82803820-82871212		70.0447	99.7415	-0.509918	63756	Non-regulated	eCLIP Peak	93626.8	1282	Non-regulated
Prkca	-1.41919	0.0208404	0.16655	chr11:107933388-108343889		688.754	977.287	-0.504793	402133	Non-regulated	eCLIP Peak	72441.6	1283	Non-regulated
Ccnj	-1.41915	0.062244	0.317293	chr19:40831278-40848572		78.4223	111.758	-0.511037	13475	Non-regulated	No eCLIP peak	93343.1	1284	Non-regulated
Hnrnpu	-1.41843	0.00701526	0.085462	chr1:178321109-178337815		4998.66	7090.08	-0.504261	11811	Non-regulated	No eCLIP peak	68933.7	1285	Non-regulated
Pcdh1	-1.41755	0.00309657	0.0529303	chr18:38189545-38209762		3581.72	5078.12	-0.50364	20724	Non-regulated	No eCLIP peak	69250.3	1286	Non-regulated
Nsrp1	-1.41748	1.31823e-05	0.00192572	chr11:77044294-77078438		1028.33	1457.88	-0.503571	31030	Non-regulated	No eCLIP peak	69989.3	1287	Non-regulated
Nrip1	-1.41732	0.00473374	0.0670114	chr16:76287403-76373827		2720.38	3855.48	-0.503103	78560	Non-regulated	eCLIP Peak	69758.5	1288	Non-regulated
Ciz1	-1.41688	0.0128989	0.12481	chr2:32363010-32380966		991.619	1405.34	-0.503057	23100	Non-regulated	eCLIP Peak	70704.5	1289	Non-regulated
Ptk2b	-1.4166	0.260696	0.693885	chr14:66153258-66281054		5914.96	8379.28	-0.502457	123762	Non-regulated	eCLIP Peak	71359.5	1290	Non-regulated
Ercc6	-1.41625	0.00965686	0.104386	chr14:32513521-32580990		805.503	1140.71	-0.501973	59047	Non-regulated	eCLIP Peak	70684.2	1291	Non-regulated
Abca2	-1.41583	0.00445101	0.064752	chr2:25428599-25448540		2046.31	2897.48	-0.501775	11805	Non-regulated	eCLIP Peak	70928.2	1292	Non-regulated
Zc3h7a	-1.41544	0.0228624	0.176209	chr16:11136594-11176393		303.411	430.028	-0.50316	35977	Non-regulated	No eCLIP peak	70108.4	1293	Non-regulated
Mbd6	-1.41541	0.104619	0.431852	chr10:127281956-127289018		68.4928	96.8746	-0.500167	2776	Non-regulated	eCLIP Peak	71544.9	1294	Non-regulated
Ikzf4	-1.41514	0.0266764	0.193683	chr10:128630843-128645993		226.726	321.208	-0.502554	33343	Non-regulated	No eCLIP peak	70631.5	1295	Non-regulated
Gm11992	-1.41454	0.480216	0.845039	chr11:9048590-9069354		192.508	272.44	-0.501022	18363	Non-regulated	No eCLIP peak	71123.4	1296	Non-regulated
Atp2b2	-1.41363	0.0312793	0.212125	chr6:113743834-114042080		1979.37	2798.35	-0.499534	289319	Non-regulated	eCLIP Peak	73292.7	1297	Non-regulated
Zfp629	-1.41345	0.0198303	0.161228	chr7:127607028-127615272		2307.29	3261.54	-0.499355	2413	Non-regulated	No eCLIP peak	75071	1298	Non-regulated
Insyn2a	-1.41324	0.0189532	0.157465	chr7:134881908-134938431		2756.37	3895.08	-0.498882	53048	Non-regulated	No eCLIP peak	84031.6	1299	Non-regulated
Gtf3c1	-1.41293	0.0537323	0.291318	chr7:125640955-125707781		2505.95	3541.1	-0.498838	59866	Non-regulated	No eCLIP peak	83982.3	1300	Non-regulated
Gm3764	-1.41264	0.0955992	0.409177	chr3:88206673-88229959		161.835	228.749	-0.499239	18244	Non-regulated	No eCLIP peak	75303.4	1301	Non-regulated
Cacna2d4	-1.41262	0.0746757	0.354179	chr6:119236524-119352407		59.0534	83.4375	-0.498675	110079	Non-regulated	No eCLIP peak	83046.8	1302	Non-regulated
Afap1	-1.41257	0.0354121	0.228366	chr5:35893319-36003922		983.643	1389.84	-0.498715	103987	Non-regulated	eCLIP Peak	83899.1	1303	Non-regulated
Kcna1	-1.41244	0.0646301	0.324942	chr6:126636463-126645801		1827.8	2581.97	-0.498364	369	Non-regulated	No eCLIP peak	82498.2	1304	Non-regulated
Mutyh	-1.41228	0.114271	0.452541	chr4:116807734-116819438		82.5573	117.1	-0.504272	10055	Non-regulated	No eCLIP peak	67766	1305	Non-regulated
Rabep2	-1.41221	0.0294969	0.204734	chr7:126428759-126449245		388.822	549.339	-0.498588	14361	Non-regulated	No eCLIP peak	82163.4	1306	Non-regulated
Arhgef11	-1.41211	0.0045657	0.0657837	chr3:87617557-87739188		2341.94	3307.59	-0.498076	113683	Non-regulated	No eCLIP peak	82924.2	1307	Non-regulated
Dnm2	-1.41192	0.00330119	0.0549978	chr9:21424908-21507759		404.146	570.648	-0.497726	79784	Non-regulated	eCLIP Peak	85682.9	1308	Non-regulated
Bcl11b	-1.41186	0.00438119	0.0639525	chr12:107910403-108003414		4955.7	6997.46	-0.497741	85089	Non-regulated	eCLIP Peak	84114.5	1309	Non-regulated
Eno4	-1.41175	0.197474	0.609379	chr19:58943425-58971419		60.3101	85.4316	-0.502371	25430	Non-regulated	No eCLIP peak	70842.1	1310	Non-regulated
Lrp8os2	-1.4112	0.0633485	0.320608	chr4:107806033-107823022		155.961	219.914	-0.495757	13912	Non-regulated	No eCLIP peak	82961.5	1311	Non-regulated
Pfkfb4	-1.41118	0.107807	0.439276	chr9:108991902-109032197		114.31	161.322	-0.496991	36963	Non-regulated	eCLIP Peak	84532.7	1312	Non-regulated
Dagla	-1.41091	0.0193867	0.159163	chr19:10245264-10304877		420.01	593.118	-0.497897	53979	Non-regulated	eCLIP Peak	81913.7	1313	Non-regulated
Shank1	-1.4107	0.001442	0.033838	chr7:44310264-44358353		7092.9	10006.8	-0.496529	40494	Non-regulated	eCLIP Peak	83635.6	1314	Non-regulated
Cacna1i	-1.41062	0.00357769	0.0574506	chr15:80287238-80398292		2323.66	3278.39	-0.496587	101261	Non-regulated	eCLIP Peak	84348.7	1315	Non-regulated
Pfas	-1.41058	0.00295215	0.0516078	chr11:68985700-69008460		643.885	909.186	-0.497771	16391	Non-regulated	No eCLIP peak	83081.2	1316	Non-regulated
Eps8	-1.41046	0.00278986	0.0498479	chr6:137477245-137649285		643.402	907.461	-0.496115	167474	Non-regulated	eCLIP Peak	83408.8	1317	Non-regulated
Tnk2	-1.40947	0.00122457	0.0306667	chr16:32644643-32683493		3451.64	4865.73	-0.495374	34448	Non-regulated	eCLIP Peak	83003.6	1318	Non-regulated
Phtf2	-1.40943	0.0160526	0.142643	chr5:20758664-20882124		222.417	313.949	-0.497261	118622	Non-regulated	No eCLIP peak	84904.9	1319	Non-regulated
Eif2s3y	-1.4093	0.799302	0.935053	chrY:1010594-1028847		1159.4	1633.9	-0.494935	15139	Non-regulated	No eCLIP peak	84719.5	1320	Non-regulated
5830417I10Rik	-1.40917	0.00860974	0.0973384	chr3:88777057-88829371		640.268	902.449	-0.49517	44182	Non-regulated	No eCLIP peak	84877.1	1321	Non-regulated
Sec14l2	-1.40915	0.0143686	0.133338	chr11:4097039-4118729		605.633	853.432	-0.494834	19162	Non-regulated	No eCLIP peak	92348	1322	Non-regulated
Fmnl1	-1.40909	0.00970154	0.104657	chr11:103171138-103198900		2378.89	3352.36	-0.494886	23989	Non-regulated	eCLIP Peak	91962.2	1323	Non-regulated
Rgs9	-1.40888	0.0999405	0.421087	chr11:109225355-109298181		95.6946	135.258	-0.4992	70341	Non-regulated	No eCLIP peak	83950.8	1324	Non-regulated
Dctn1	-1.40878	0.00676707	0.083967	chr6:83165924-83200125		21976.4	30960.7	-0.49448	30079	Non-regulated	No eCLIP peak	93821.7	1325	Non-regulated
Raph1	-1.4087	0.0240987	0.181482	chr1:60482310-60566765		5840.56	8227.53	-0.494353	74464	Non-regulated	No eCLIP peak	93536.2	1326	Non-regulated
Serpina3m	-1.40859	0.577802	0.8872	chr12:104387164-104394258		92.9031	130.823	-0.493818	54113	Non-regulated	No eCLIP peak	95422.7	1327	Non-regulated
Rdx	-1.40851	0.00798888	0.0926769	chr9:52047150-52088737		812.275	1143.65	-0.493607	50130	Non-regulated	No eCLIP peak	94322.8	1328	Non-regulated
Gria2	-1.40848	0.0467916	0.269129	chr3:80681452-80802836		1980.05	2789	-0.494213	111015	Non-regulated	No eCLIP peak	94681.8	1329	Non-regulated
Lrrc8b	-1.40844	0.0140573	0.131465	chr5:105415774-105490079		767.6	1080.85	-0.493735	67574	Non-regulated	eCLIP Peak	95070.4	1330	Non-regulated
Tro	-1.40839	0.00218156	0.0429223	chrX:150644710-150657583		1319.57	1858.7	-0.494231	5721	Non-regulated	No eCLIP peak	92815.2	1331	Non-regulated
Trim25	-1.40837	0.191966	0.600822	chr11:88999402-89020293		29.5225	41.6142	-0.495257	15352	Non-regulated	No eCLIP peak	84124.4	1332	Non-regulated
Abcg1	-1.40807	0.00155088	0.0350798	chr17:31057694-31117984		593.675	835.877	-0.493617	54470	Non-regulated	eCLIP Peak	94100.7	1333	Non-regulated
Ranbp10	-1.40786	0.00403029	0.061536	chr8:105768308-105827351		643.069	905.465	-0.493684	53735	Non-regulated	eCLIP Peak	94605.5	1334	Non-regulated
Fut9	-1.40749	0.0207317	0.165946	chr4:25609333-25800246		1973.22	2776.74	-0.492843	178681	Non-regulated	No eCLIP peak	88380.7	1335	Non-regulated
Mfap1a	-1.40738	0.000136741	0.00804984	chr2:121492681-121506662		2116.59	2978.43	-0.492806	10557	Non-regulated	No eCLIP peak	91124.8	1336	Non-regulated
Grik4	-1.40701	0.00243177	0.0455212	chr9:42520412-42944499		391.22	550.609	-0.493048	420472	Non-regulated	eCLIP Peak	91978.7	1337	Non-regulated
Camsap2	-1.40692	0.0103515	0.108919	chr1:136268123-136346105		1329.26	1870.01	-0.492426	70159	Non-regulated	eCLIP Peak	91272.2	1338	Non-regulated
Amot	-1.40674	0.22883	0.658145	chrX:145446425-145487639		32.078	45.2736	-0.497084	52201	Non-regulated	No eCLIP peak	84663.8	1339	Non-regulated
Tpcn1	-1.40671	0.0278342	0.198796	chr5:120534158-120588674		146.662	206.07	-0.490639	49809	Non-regulated	eCLIP Peak	89724.1	1340	Non-regulated
Sla	-1.40635	0.635626	0.905642	chr15:66780819-66831830		210.242	295.727	-0.492212	47876	Non-regulated	No eCLIP peak	90800.1	1341	Non-regulated
Catsper2	-1.40596	0.290403	0.723633	chr2:121392638-121414583		31.5438	44.2166	-0.487228	18686	Non-regulated	No eCLIP peak	90792.1	1342	Non-regulated
Ppp2r3a	-1.40518	0.0174115	0.149416	chr9:101104992-101251832		616.941	867.354	-0.491489	139926	Non-regulated	eCLIP Peak	90917.5	1343	Non-regulated
Zfp267	-1.40504	0.0311586	0.211846	chr3:36151080-36170341		434.707	610.182	-0.489197	12637	Non-regulated	No eCLIP peak	84972	1344	Non-regulated
Kcnc3	-1.40466	0.00113846	0.0291723	chr7:44587357-44604752		6932.08	9737.27	-0.490229	8810	Non-regulated	No eCLIP peak	90010	1345	Non-regulated
Ralgapa2	-1.40427	0.0381885	0.238195	chr2:146241301-146512006		3214.8	4514.28	-0.489768	261096	Non-regulated	eCLIP Peak	90314.1	1346	Non-regulated
Pcsk5	-1.40422	0.239075	0.670176	chr19:17432314-17837633		68.1773	95.9632	-0.493189	398126	Non-regulated	No eCLIP peak	95653.5	1347	Non-regulated
Amer1	-1.40411	0.00940617	0.102672	chrX:95420313-95444840		389.277	546.511	-0.489456	16059	Non-regulated	No eCLIP peak	87455.2	1348	Non-regulated
Gatad2b	-1.40381	0.0205609	0.165235	chr3:90293181-90363403		1066.74	1497.43	-0.489286	62792	Non-regulated	No eCLIP peak	85219.2	1349	Non-regulated
Emid1	-1.40377	0.653614	0.905642	chr11:5106265-5152242		257.569	361.621	-0.489516	44046	Non-regulated	No eCLIP peak	87848.5	1350	Non-regulated
Tbc1d10c	-1.4035	0.00901619	0.0996836	chr19:4183411-4191049		353.125	495.067	-0.487444	4819	Non-regulated	No eCLIP peak	88161.8	1351	Non-regulated
Adgra1	-1.4033	0.00044148	0.0164081	chr7:139834174-139878086		4068.99	5711.17	-0.489114	39157	Non-regulated	No eCLIP peak	85178.5	1352	Non-regulated
Cobl	-1.40304	0.0219704	0.172078	chr11:12236608-12464962		707.67	993.491	-0.489431	222742	Non-regulated	No eCLIP peak	87419.7	1353	Non-regulated
Sh3d19	-1.40299	0.0624298	0.31783	chr3:85971118-86130526		156.751	219.565	-0.486169	152201	Non-regulated	No eCLIP peak	90817.6	1354	Non-regulated
Acin1	-1.40298	0.018398	0.154437	chr14:54642161-54686965		1301.05	1825.03	-0.488243	40036	Non-regulated	eCLIP Peak	85063.5	1355	Non-regulated
Nacc2	-1.40258	0.00454256	0.0655699	chr2:26053545-26122811		16422.1	23033.2	-0.488076	60906	Non-regulated	eCLIP Peak	84989.8	1356	Non-regulated
Scg3	-1.40256	0.0190712	0.157863	chr9:75643264-75684056		5139.11	7207.61	-0.488003	38484	Non-regulated	No eCLIP peak	85179.1	1357	Non-regulated
Dixdc1	-1.40216	0.00189736	0.0394916	chr9:50662752-50739447		1278.51	1792.52	-0.487527	70903	Non-regulated	No eCLIP peak	85008.7	1358	Non-regulated
Ina	-1.40138	0.000435337	0.0162738	chr19:47014681-47025326		11043.9	15476.9	-0.486861	7390	Non-regulated	No eCLIP peak	93714.5	1359	Non-regulated
Cux1	-1.40126	0.00778394	0.0911615	chr5:136248136-136567492		12583	17632.3	-0.486739	316299	Non-regulated	eCLIP Peak	93929.2	1360	Non-regulated
Colq	-1.40125	0.147549	0.523707	chr14:31523084-31577386		61.3872	85.5151	-0.47824	51465	Non-regulated	No eCLIP peak	81943.5	1361	Non-regulated
Igfbp4	-1.40123	0.639194	0.905642	chr11:99041242-99054391		2916.6	4086.86	-0.486707	9318	Non-regulated	No eCLIP peak	91438	1362	Non-regulated
Cic	-1.40107	0.00162579	0.0357743	chr7:25267698-25294159		3395.12	4757.4	-0.486711	18235	Non-regulated	eCLIP Peak	90983.1	1363	Non-regulated
Gramd1b	-1.40083	0.0266851	0.193702	chr9:40293233-40531385		6759.35	9468.35	-0.486229	234288	Non-regulated	eCLIP Peak	91558.4	1364	Non-regulated
Ajap1	-1.39978	0.00232598	0.0445622	chr4:153373221-153482830		4395.75	6152.97	-0.485174	106543	Non-regulated	eCLIP Peak	88945.5	1365	Non-regulated
Pacsin1	-1.3997	0.00354449	0.0571209	chr17:27655588-27711117		16417.5	22980	-0.485143	51329	Non-regulated	eCLIP Peak	88157.1	1366	Non-regulated
Cdh20	-1.39939	0.0104936	0.109896	chr1:104768520-104995481		1146.39	1603.8	-0.484394	222941	Non-regulated	eCLIP Peak	91251.1	1367	Non-regulated
Mtss2	-1.39928	0.00482035	0.0677511	chr8:110721476-110741401		1780.57	2491.82	-0.484859	15208	Non-regulated	No eCLIP peak	87499.5	1368	Non-regulated
Adcy9	-1.39912	0.0480341	0.273438	chr16:4284886-4420499		217.538	303.746	-0.481598	127996	Non-regulated	eCLIP Peak	95480.7	1369	Non-regulated
Plat	-1.399	0.00846336	0.0962353	chr8:22757722-22782847		575.22	804.814	-0.484541	22573	Non-regulated	No eCLIP peak	88725.3	1370	Non-regulated
Epcam	-1.39877	0.482916	0.845039	chr17:87635979-87651127		114.603	160.375	-0.484811	13088	Non-regulated	No eCLIP peak	87909.9	1371	Non-regulated
Prpf38b	-1.39872	0.0311992	0.211982	chr3:108902805-108911729		280.305	392.057	-0.484065	5895	Non-regulated	No eCLIP peak	89116.9	1372	Non-regulated
1810055G02Rik	-1.39825	0.00947676	0.103221	chr19:3708293-3717882		250.484	350.849	-0.486132	7667	Non-regulated	No eCLIP peak	90154	1373	Non-regulated
Pxn	-1.39806	0.0181583	0.153405	chr5:115506676-115555986		264.129	369.9	-0.485892	45606	Non-regulated	eCLIP Peak	89382.9	1374	Non-regulated
Mgll	-1.39789	0.00865067	0.0975154	chr6:88724412-88828360		9010.56	12595.6	-0.483229	100273	Non-regulated	eCLIP Peak	91560.9	1375	Non-regulated
Agl	-1.39782	0.00464309	0.0662788	chr3:116739999-116808166		621.761	869.518	-0.483856	58543	Non-regulated	No eCLIP peak	90324.7	1376	Non-regulated
Adcyap1r1	-1.39778	0.0786404	0.363901	chr6:55451978-55501455		182.956	255.654	-0.482691	43317	Non-regulated	No eCLIP peak	94277.1	1377	Non-regulated
Rgma	-1.39766	0.00816247	0.0939995	chr7:73375507-73419899		299.527	418.918	-0.483981	40910	Non-regulated	No eCLIP peak	90145	1378	Non-regulated
Ckap5	-1.39721	0.0233579	0.17854	chr2:91526762-91620665		1641.2	2292.87	-0.4824	87238	Non-regulated	No eCLIP peak	94337.7	1379	Non-regulated
Cep131	-1.39691	0.0388551	0.240966	chr11:120064430-120086829		1071.53	1497.62	-0.482994	18820	Non-regulated	eCLIP Peak	93391.7	1380	Non-regulated
Fbxo32	-1.39673	0.0427936	0.256128	chr15:58175879-58214926		192.097	268.87	-0.48507	32078	Non-regulated	No eCLIP peak	87674.9	1381	Non-regulated
Ptpn11	-1.39653	0.002094	0.0419519	chr5:121130534-121191397		5713.8	7979.04	-0.481766	55266	Non-regulated	No eCLIP peak	95807.3	1382	Non-regulated
Tnks1bp1	-1.39644	0.0186379	0.155664	chr2:85050460-85073048		495.259	692.21	-0.483027	20791	Non-regulated	No eCLIP peak	91380	1383	Non-regulated
Ikbkb	-1.3963	0.0382845	0.238493	chr8:22659201-22706583		1389.79	1940.32	-0.481425	43787	Non-regulated	No eCLIP peak	94238.6	1384	Non-regulated
Erbin	-1.39608	0.0442764	0.260701	chr13:103818787-103920586		531.726	742.084	-0.4809	95359	Non-regulated	eCLIP Peak	94414.6	1385	Non-regulated
Phc1	-1.39587	0.00482794	0.0677974	chr6:122317731-122340562		773.423	1080.09	-0.481819	19131	Non-regulated	No eCLIP peak	94925.1	1386	Non-regulated
Ahr	-1.39559	0.0671602	0.332339	chr12:35497979-35535039		209.145	291.749	-0.480225	31517	Non-regulated	No eCLIP peak	95728	1387	Non-regulated
Zfp184	-1.3955	0.377467	0.793776	chr13:21945094-21960604		18.2885	25.3438	-0.470694	12470	Non-regulated	No eCLIP peak	77869.2	1388	Non-regulated
Sgsm2	-1.39528	0.00107469	0.0282589	chr11:74849262-74897071		3608.93	5036.17	-0.480758	43057	Non-regulated	eCLIP Peak	94894.8	1389	Non-regulated
Arfgef2	-1.39502	0.0300491	0.207295	chr2:166805577-166898052		1044.61	1457.21	-0.480249	83695	Non-regulated	eCLIP Peak	95877.4	1390	Non-regulated
Man2a2	-1.39499	0.00749456	0.0890374	chr7:80349098-80371375		2219.64	3096.67	-0.480391	15725	Non-regulated	No eCLIP peak	95911.7	1391	Non-regulated
Nos1	-1.39491	0.0501503	0.280227	chr5:117842186-117958839		735.903	1026.64	-0.480344	106868	Non-regulated	No eCLIP peak	96764.5	1392	Non-regulated
Mrtfa	-1.39482	0.00391558	0.0603723	chr15:81012281-81190758		1262.6	1761.76	-0.480622	174111	Non-regulated	eCLIP Peak	95886.4	1393	Non-regulated
Tonsl	-1.39479	0.0345362	0.224988	chr15:76626238-76639930		246.364	343.687	-0.480301	9486	Non-regulated	No eCLIP peak	95472.9	1394	Non-regulated
Jmy	-1.39472	0.0238301	0.180364	chr13:93430097-93499809		378.916	528.491	-0.480001	60932	Non-regulated	No eCLIP peak	96071.9	1395	Non-regulated
Efemp1	-1.39468	0.172399	0.569004	chr11:28853203-28926743		72.3722	100.962	-0.480303	71503	Non-regulated	No eCLIP peak	95898.7	1396	Non-regulated
Hirip3	-1.39462	0.0139276	0.130842	chr7:126861972-126865378		690.799	963.962	-0.48071	640	Non-regulated	No eCLIP peak	94627.1	1397	Non-regulated
Caln1	-1.39414	0.425522	0.815334	chr5:130369458-130840626		247.28	344.772	-0.479496	468919	Non-regulated	eCLIP Peak	94930.2	1398	Non-regulated
Zfp523	-1.39403	0.00253218	0.0467254	chr17:28177196-28205885		2742.17	3822.69	-0.479273	25894	Non-regulated	eCLIP Peak	91387.2	1399	Non-regulated
Cntnap5a	-1.39399	0.0211222	0.167568	chr1:115684737-116587323		523.664	729.82	-0.478897	891623	Non-regulated	No eCLIP peak	91339.1	1400	Non-regulated
Kcnk12	-1.39373	0.0195668	0.159827	chr17:87745821-87797994		218.803	305.67	-0.482342	50222	Non-regulated	eCLIP Peak	94836.1	1401	Non-regulated
Chrna1os	-1.39334	0.356893	0.78062	chr2:73584860-73589208		24.3184	34.0818	-0.486956	3856	Non-regulated	No eCLIP peak	93468.7	1402	Non-regulated
Sin3a	-1.39317	0.0369257	0.233685	chr9:57072040-57128368		759.475	1058.04	-0.478314	48068	Non-regulated	eCLIP Peak	82389.6	1403	Non-regulated
Rbm19	-1.39316	0.00344367	0.0561849	chr5:120116483-120198980		1291.37	1799.51	-0.478707	78507	Non-regulated	eCLIP Peak	82518.4	1404	Non-regulated
Rbpms2	-1.39314	0.234044	0.665275	chr9:65629647-65660528		34.7689	48.0417	-0.466487	29078	Non-regulated	No eCLIP peak	72039	1405	Non-regulated
Pparg	-1.3927	0.162801	0.553755	chr6:115360951-115490401		40.9266	57.318	-0.485947	127324	Non-regulated	No eCLIP peak	90156.3	1406	Non-regulated
0610030E20Rik	-1.39238	0.144106	0.517306	chr6:72347316-72353158		224.127	311.762	-0.476131	1210	Non-regulated	No eCLIP peak	81103.1	1407	Non-regulated
Hlcs	-1.39235	0.101307	0.424127	chr16:94128882-94313573		186.491	260.036	-0.479602	179309	Non-regulated	eCLIP Peak	95571.8	1408	Non-regulated
Swt1	-1.39223	0.14033	0.510048	chr1:151367699-151428456		42.429	58.8537	-0.472082	57069	Non-regulated	eCLIP Peak	77515.3	1409	Non-regulated
Smpd4	-1.39208	0.00379254	0.0592269	chr16:17619353-17644830		843.776	1174.94	-0.477654	20852	Non-regulated	No eCLIP peak	82502.9	1410	Non-regulated
Prag1	-1.39166	0.062282	0.317436	chr8:36094828-36147787		896.833	1248.67	-0.477482	48180	Non-regulated	eCLIP Peak	82767.6	1411	Non-regulated
Adcy6	-1.39138	0.0415613	0.251279	chr15:98589992-98607635		499.408	694.981	-0.476753	11623	Non-regulated	eCLIP Peak	82171.2	1412	Non-regulated
Ptpdc1	-1.39129	0.00497234	0.0689961	chr13:48577869-48625672		561.623	781.568	-0.476769	43391	Non-regulated	No eCLIP peak	82328.2	1413	Non-regulated
Rasgrf2	-1.39113	0.00114202	0.0292256	chr13:91880407-92131828		3064.52	4263.5	-0.47638	243496	Non-regulated	eCLIP Peak	82763.2	1414	Non-regulated
Zhx3	-1.39111	0.00273226	0.0491806	chr2:160748708-160872999		3192.15	4441.12	-0.476396	120759	Non-regulated	eCLIP Peak	83837.3	1415	Non-regulated
Chd1	-1.39107	0.133741	0.495779	chr17:15704966-15772612		142.077	197.026	-0.471718	59728	Non-regulated	No eCLIP peak	74219.8	1416	Non-regulated
Ttc7	-1.39091	0.101384	0.424335	chr17:87282884-87381770		68.0402	94.6359	-0.476	94270	Non-regulated	eCLIP Peak	81155.1	1417	Non-regulated
Dip2b	-1.39091	0.0104044	0.109215	chr15:100038664-100219473		659.995	918.44	-0.47673	171896	Non-regulated	eCLIP Peak	83873.4	1418	Non-regulated
Zfp91	-1.39033	0.00676219	0.0839526	chr19:12766009-12796127		6678.08	9284.15	-0.475336	29246	Non-regulated	No eCLIP peak	81501	1419	Non-regulated
Polr2a	-1.3903	0.0683594	0.335618	chr11:69733997-69758637		207.596	289.096	-0.477769	17901	Non-regulated	No eCLIP peak	81637.9	1420	Non-regulated
Plekhg5	-1.39013	0.13018	0.488141	chr4:152086842-152115403		474.53	659.921	-0.475795	38960	Non-regulated	eCLIP Peak	80987.4	1421	Non-regulated
Vgll2	-1.39006	0.0846019	0.379842	chr10:52022502-52028471		151.093	209.382	-0.470702	4320	Non-regulated	No eCLIP peak	77377.1	1422	Non-regulated
Snapc1	-1.39	0.000456494	0.0167296	chr12:73964497-73989065		2313.65	3214.72	-0.474521	18166	Non-regulated	No eCLIP peak	82232.6	1423	Non-regulated
Marveld1	-1.3899	0.0584864	0.305543	chr19:42147389-42151703		145.177	201.599	-0.473681	1238	Non-regulated	No eCLIP peak	76768.9	1424	Non-regulated
Depdc5	-1.38966	0.0157407	0.140982	chr5:32863721-32994233		2251.47	3128.82	-0.474755	122300	Non-regulated	eCLIP Peak	83253.1	1425	Non-regulated
Setd1b	-1.38938	0.0129383	0.125002	chr5:123142193-123168629		910.056	1264.83	-0.474919	17580	Non-regulated	No eCLIP peak	81418.9	1426	Non-regulated
Dop1b	-1.38925	0.00436717	0.0638745	chr16:93711907-93810590		1418.75	1970.95	-0.474274	91366	Non-regulated	No eCLIP peak	84675.3	1427	Non-regulated
Mdga2	-1.38925	0.0267988	0.194081	chr12:66466059-67222550		728.674	1012.13	-0.47405	746657	Non-regulated	eCLIP Peak	84027.7	1428	Non-regulated
Elfn1	-1.3892	0.0487736	0.27585	chr5:139907866-139974725		700.536	972.968	-0.473934	62948	Non-regulated	eCLIP Peak	77024.1	1429	Non-regulated
Ccdc186	-1.38888	0.0062846	0.0804806	chr19:56787483-56822199		1798.48	2498.1	-0.474054	28265	Non-regulated	No eCLIP peak	84164.9	1430	Non-regulated
Garem1	-1.38884	0.0204334	0.16473	chr18:21127201-21300140		3523.86	4893.86	-0.473816	168015	Non-regulated	eCLIP Peak	78367.9	1431	Non-regulated
Anks1	-1.38881	0.0537122	0.291259	chr17:27909306-28062779		464.541	645.459	-0.47452	147651	Non-regulated	eCLIP Peak	82539.5	1432	Non-regulated
Pdk1	-1.38881	0.0243618	0.183114	chr2:71873222-71903858		285.562	396.055	-0.4719	25450	Non-regulated	No eCLIP peak	73316.2	1433	Non-regulated
Osbpl6	-1.38842	0.0401561	0.245988	chr2:76406508-76600645		1615.82	2242.96	-0.473138	185853	Non-regulated	eCLIP Peak	75988.3	1434	Non-regulated
Ankle2	-1.38841	0.0284507	0.201407	chr5:110231001-110256651		787.857	1093.39	-0.472797	20623	Non-regulated	No eCLIP peak	74774	1435	Non-regulated
Samd4b	-1.3884	0.00037751	0.0147342	chr7:28399535-28436191		2479.52	3442.06	-0.473209	194247	Non-regulated	No eCLIP peak	77723.1	1436	Non-regulated
Tjp1	-1.38796	0.00950531	0.103316	chr7:65296165-65371244		669.936	929.374	-0.472237	184529	Non-regulated	No eCLIP peak	77225	1437	Non-regulated
Ccp110	-1.38753	0.0597067	0.309764	chr7:118712543-118737021		464.189	643.575	-0.471398	19400	Non-regulated	No eCLIP peak	74439.1	1438	Non-regulated
Ighmbp2	-1.38719	0.0294668	0.204665	chr19:3259076-3283010		275.478	383.098	-0.475775	18373	Non-regulated	No eCLIP peak	81300.9	1439	Non-regulated
Fgf11	-1.38716	0.0645869	0.324777	chr11:69796068-69802937		949.621	1317.64	-0.47253	2746	Non-regulated	No eCLIP peak	75398.5	1440	Non-regulated
Gpr158	-1.38705	0.0338679	0.222494	chr2:21367541-21830546		1537.84	2132.91	-0.471915	455835	Non-regulated	eCLIP Peak	77028.3	1441	Non-regulated
Cpne5	-1.3869	0.0353208	0.228168	chr17:29156521-29237803		1029.99	1428.87	-0.47224	76904	Non-regulated	No eCLIP peak	76703.9	1442	Non-regulated
Slc16a6	-1.38667	0.0461445	0.267143	chr11:109450855-109473599		239.44	332.331	-0.472956	18525	Non-regulated	eCLIP Peak	74570.2	1443	Non-regulated
Nppa	-1.38648	0.0162049	0.143438	chr4:148000722-148002074		943.493	1307.47	-0.470694	493	Non-regulated	No eCLIP peak	78720.9	1444	Non-regulated
Cdk11b	-1.38632	0.0010212	0.0273133	chr4:155624854-155649935		1393.73	1932.79	-0.471736	22475	Non-regulated	No eCLIP peak	73692.3	1445	Non-regulated
Dgkz	-1.38608	0.0395836	0.243698	chr2:91932822-91965602		12352.9	17122.4	-0.471028	39529	Non-regulated	No eCLIP peak	76863.8	1446	Non-regulated
Furin	-1.38582	0.0022424	0.0436499	chr7:80388583-80405436		3592.16	4978.44	-0.470843	12072	Non-regulated	eCLIP Peak	76520.8	1447	Non-regulated
Ranbp2	-1.38544	0.0216278	0.170387	chr10:58446852-58494155		1779.29	2464.74	-0.470136	37827	Non-regulated	No eCLIP peak	79350.9	1448	Non-regulated
Rgs12	-1.38534	0.0628716	0.319287	chr5:34949446-35033591		311.126	431.343	-0.471335	78679	Non-regulated	eCLIP Peak	75695.7	1449	Non-regulated
Adgrb2	-1.38471	0.452161	0.835475	chr4:129984870-130022633		3046.06	4217.93	-0.469594	32594	Non-regulated	eCLIP Peak	80318.8	1450	Non-regulated
Adgrg1	-1.38415	0.0495798	0.278618	chr8:94977109-95014217		783.618	1085.47	-0.4701	33495	Non-regulated	No eCLIP peak	79375.1	1451	Non-regulated
Med13	-1.38385	0.00782158	0.0912392	chr11:86265715-86357596		2501.13	3460.57	-0.468428	80024	Non-regulated	No eCLIP peak	80617.7	1452	Non-regulated
Ccdc112	-1.38377	0.105419	0.433404	chr18:46282151-46311928		140.075	194.3	-0.472093	26977	Non-regulated	No eCLIP peak	76200.5	1453	Non-regulated
Cd276	-1.3837	0.0421041	0.253734	chr9:58524123-58555132		139.323	192.967	-0.469916	27537	Non-regulated	No eCLIP peak	79776.3	1454	Non-regulated
Fmnl2	-1.38279	0.0531425	0.28928	chr2:52857868-53134202		1098.81	1519.07	-0.467248	270484	Non-regulated	eCLIP Peak	77184.4	1455	Non-regulated
Grm1	-1.38264	0.0570675	0.300719	chr10:10686059-11082356		6518.94	9013.57	-0.46746	389368	Non-regulated	eCLIP Peak	80755.3	1456	Non-regulated
Zdbf2	-1.38254	0.0675758	0.333587	chr1:63200358-63314575		732.421	1012.12	-0.466635	28683	Non-regulated	No eCLIP peak	71919.2	1457	Non-regulated
Clock	-1.38253	0.0473305	0.271096	chr5:76209869-76304792		351.971	486.06	-0.465677	85181	Non-regulated	No eCLIP peak	73493.2	1458	Non-regulated
Ano3	-1.38178	0.377272	0.793776	chr2:110655201-110950245		262.399	362.685	-0.466956	289018	Non-regulated	eCLIP Peak	74629.7	1459	Non-regulated
Clasrp	-1.38161	0.00042103	0.0159104	chr7:19581031-19604486		605.365	837.205	-0.467775	21272	Non-regulated	No eCLIP peak	80485.1	1460	Non-regulated
Arrb1	-1.38158	0.000639376	0.0206921	chr7:99535464-99606771		17124	23657.9	-0.4663	64174	Non-regulated	eCLIP Peak	74347.3	1461	Non-regulated
Fbxw7	-1.38122	0.0162549	0.143482	chr3:84815478-84979197		2681.8	3704.1	-0.465925	159458	Non-regulated	No eCLIP peak	74830	1462	Non-regulated
Ankrd52	-1.3812	0.0474171	0.271247	chr10:128377113-128394006		1369.11	1891.52	-0.466311	18745	Non-regulated	eCLIP Peak	71903.2	1463	Non-regulated
Camk1g	-1.38081	0.0819044	0.37291	chr1:193346347-193370282		534.366	738.099	-0.465986	21484	Non-regulated	No eCLIP peak	74739.4	1464	Non-regulated
Osbpl5	-1.38052	0.00584489	0.0768777	chr7:143688757-143757008		4468.11	6168.72	-0.465307	49208	Non-regulated	eCLIP Peak	73527.3	1465	Non-regulated
Fmod	-1.38036	0.542897	0.859623	chr1:134037254-134048280		94.8458	130.949	-0.465351	7904	Non-regulated	No eCLIP peak	73388.4	1466	Non-regulated
Tspan10	-1.38008	0.0279632	0.199312	chr11:120442631-120447321		1527	2107.74	-0.465002	2627	Non-regulated	No eCLIP peak	74695.1	1467	Non-regulated
Ephb3	-1.38005	0.532552	0.852526	chr16:21204778-21223305		96.4117	133.047	-0.464658	14365	Non-regulated	No eCLIP peak	74966	1468	Non-regulated
Ablim3	-1.37971	0.0170679	0.147994	chr18:61799392-61911852		337.166	464.468	-0.462121	108245	Non-regulated	No eCLIP peak	74983.9	1469	Non-regulated
Fbxo41	-1.37968	0.0100207	0.106774	chr6:85469578-85502994		1277.48	1763.45	-0.465104	26916	Non-regulated	eCLIP Peak	74503.8	1470	Non-regulated
Mapt	-1.37966	0.00156422	0.0351853	chr11:104231436-104332090		4551.33	6279.58	-0.464381	95448	Non-regulated	No eCLIP peak	76973.1	1471	Non-regulated
Kif16b	-1.37934	0.0819586	0.373016	chr2:142618345-142901519		247.291	341.134	-0.464127	277675	Non-regulated	eCLIP Peak	76061.7	1472	Non-regulated
Trip12	-1.3791	0.00544358	0.0730612	chr1:84721189-84840517		5759.68	7942.42	-0.46359	109738	Non-regulated	No eCLIP peak	73464.6	1473	Non-regulated
Kcnq2	-1.37901	0.00427676	0.0632703	chr2:181075581-181135289		735.401	1014.66	-0.464393	56655	Non-regulated	eCLIP Peak	74852.3	1474	Non-regulated
Phc3	-1.37862	0.10248	0.426658	chr3:30899295-30969417		303.489	418.341	-0.463035	59055	Non-regulated	No eCLIP peak	72399.8	1475	Non-regulated
Sel1l3	-1.37853	0.11314	0.450361	chr5:53107084-53213927		264.168	363.351	-0.459907	101858	Non-regulated	No eCLIP peak	78448.3	1476	Non-regulated
Ccdc17	-1.37849	0.21851	0.642877	chr4:116596653-116600266		49.1511	68.2352	-0.473291	1640	Non-regulated	No eCLIP peak	77045.3	1477	Non-regulated
Ttll5	-1.37838	0.0347674	0.22587	chr12:85824670-86061893		287.448	395.991	-0.462167	223970	Non-regulated	eCLIP Peak	73395.7	1478	Non-regulated
Tacc2	-1.37818	0.00413184	0.0623212	chr7:130577438-130764886		3560.02	4906.46	-0.462796	183395	Non-regulated	No eCLIP peak	74892.3	1479	Non-regulated
Cpeb2	-1.37808	0.00331018	0.0550603	chr5:43233253-43289724		577.019	794.583	-0.461579	49439	Non-regulated	No eCLIP peak	74079.2	1480	Non-regulated
Nedd4	-1.37769	0.0503914	0.280878	chr9:72652621-72749851		2006.31	2763.93	-0.462177	82008	Non-regulated	No eCLIP peak	73149.3	1481	Non-regulated
Zzz3	-1.3776	0.00284807	0.050318	chr3:152395472-152474322		781.863	1076.41	-0.461242	59217	Non-regulated	No eCLIP peak	72848.3	1482	Non-regulated
Zfp503	-1.3772	0.0867055	0.385393	chr14:21983963-21989601		204.398	282.174	-0.465207	1427	Non-regulated	No eCLIP peak	73148.5	1483	Non-regulated
Htt	-1.37697	0.0629375	0.319435	chr5:34761739-34912534		1704.69	2347.42	-0.46157	137576	Non-regulated	eCLIP Peak	73715.2	1484	Non-regulated
AA465934	-1.37673	0.343002	0.766671	chr11:83291699-83294929		471.296	648.522	-0.460523	2550	Non-regulated	No eCLIP peak	77592	1485	Non-regulated
Atp11c	-1.37658	0.157689	0.543818	chrX:60223283-60404005		54.8949	75.233	-0.454694	363370	Non-regulated	eCLIP Peak	94854.9	1486	Non-regulated
Marchf4	-1.37654	0.107361	0.43808	chr1:72427112-72537159		212.476	291.822	-0.45779	105266	Non-regulated	No eCLIP peak	86796.1	1487	Non-regulated
Sp1	-1.37589	0.0338741	0.222494	chr15:102405889-102436404		418.495	575.909	-0.460632	22271	Non-regulated	No eCLIP peak	77496.9	1488	Non-regulated
Nrg2	-1.37571	0.0342399	0.224151	chr18:36014581-36197391		268.021	368.658	-0.459936	176673	Non-regulated	eCLIP Peak	78965.2	1489	Non-regulated
Adcy5	-1.37571	0.00038265	0.0148513	chr16:35154864-35305743		7547.51	10383.3	-0.460197	143854	Non-regulated	eCLIP Peak	77457.8	1490	Non-regulated
Tfap2d	-1.37556	0.717212	0.905642	chr1:19103021-19173948		154.206	212.166	-0.460341	61564	Non-regulated	No eCLIP peak	77667.3	1491	Non-regulated
Odr4	-1.37554	0.0506583	0.281723	chr1:150361305-150393080		677.512	931.782	-0.459747	28503	Non-regulated	No eCLIP peak	78461.7	1492	Non-regulated
Washc2	-1.37551	0.0569348	0.300422	chr6:116208032-116262670		1280.61	1761.21	-0.459736	50342	Non-regulated	No eCLIP peak	78548	1493	Non-regulated
Gna12	-1.37542	0.00860404	0.0973089	chr5:140759944-140830431		964.69	1326.47	-0.459455	68608	Non-regulated	No eCLIP peak	78101.1	1494	Non-regulated
Slc35d1	-1.37538	0.367277	0.787905	chr4:103170653-103215176		25.8315	35.299	-0.450496	40274	Non-regulated	No eCLIP peak	101017	1495	Non-regulated
Shc2	-1.3753	0.00054541	0.0186658	chr10:79617940-79637918		1861.38	2560.34	-0.459965	16024	Non-regulated	No eCLIP peak	79077.5	1496	Non-regulated
Dis3	-1.37528	0.0606794	0.312652	chr14:99076634-99099770		181.07	249.049	-0.459881	19415	Non-regulated	No eCLIP peak	77978.4	1497	Non-regulated
Gh	-1.37523	0.851276	0.948986	chr11:106300261-106301896		53.7239	73.8186	-0.458421	733	Non-regulated	No eCLIP peak	76995.5	1498	Non-regulated
Qk	-1.37485	0.105977	0.434794	chr17:10206471-10319854		163.436	224.999	-0.461192	108233	Non-regulated	No eCLIP peak	72688.8	1499	Non-regulated
Mfsd6	-1.37485	0.0328074	0.218721	chr1:52656286-52727462		2751.53	3782.51	-0.459112	66245	Non-regulated	No eCLIP peak	77432.3	1500	Non-regulated
Gm14267	-1.3744	0.0591643	0.307839	chr2:166500036-166529010		70.1434	96.3797	-0.458423	21034	Non-regulated	No eCLIP peak	76540	1501	Non-regulated
Usp24	-1.37432	0.0276441	0.198105	chr4:106316213-106441327		1663.28	2285.67	-0.458582	114511	Non-regulated	eCLIP Peak	77703.4	1502	Non-regulated
Ppard	-1.3742	0.000220392	0.0107599	chr17:28232754-28301472		846.614	1163.15	-0.458258	65498	Non-regulated	eCLIP Peak	78366.2	1503	Non-regulated
Fnbp1	-1.37411	0.0411968	0.249889	chr2:31026206-31142008		2133.14	2931.04	-0.458435	111076	Non-regulated	No eCLIP peak	76629.8	1504	Non-regulated
Txlna	-1.37369	0.00167883	0.0365085	chr4:129626078-129641065		966.144	1327.68	-0.458603	10419	Non-regulated	No eCLIP peak	77357.1	1505	Non-regulated
Klhl38	-1.37358	0.139128	0.507342	chr15:58314573-58324170		79.2914	109.377	-0.464077	7385	Non-regulated	No eCLIP peak	73396.6	1506	Non-regulated
Ncan	-1.37357	0.0152386	0.138116	chr8:70093085-70120844		14056.9	19308.3	-0.457942	20594	Non-regulated	No eCLIP peak	86240	1507	Non-regulated
Slc9a7	-1.37283	0.0288629	0.203019	chrX:20098851-20291827		415.49	570.318	-0.456954	183541	Non-regulated	eCLIP Peak	97550.1	1508	Non-regulated
Esco1	-1.37232	0.100791	0.423033	chr18:10566508-10610354		164.565	225.496	-0.454443	39301	Non-regulated	No eCLIP peak	95836.6	1509	Non-regulated
Rapgef6	-1.37227	0.0440007	0.259781	chr11:54522844-54699286		644.817	885.013	-0.45681	168250	Non-regulated	No eCLIP peak	95844.5	1510	Non-regulated
Gramd4	-1.37215	0.0163006	0.143661	chr15:86057695-86137636		768.924	1055.09	-0.456447	75825	Non-regulated	eCLIP Peak	96899.4	1511	Non-regulated
Eps15l1	-1.37168	0.0159008	0.141828	chr8:72340999-72421474		1642.06	2252.47	-0.456001	77333	Non-regulated	eCLIP Peak	97216.9	1512	Non-regulated
Sort1	-1.37159	0.0493959	0.278179	chr3:108284064-108361517		5151.8	7066.15	-0.455848	70625	Non-regulated	No eCLIP peak	96677.2	1513	Non-regulated
Khsrp	-1.37153	0.016233	0.143438	chr17:57021049-57031507		1837.52	2520.87	-0.456162	6460	Non-regulated	No eCLIP peak	96420.6	1514	Non-regulated
Nefm	-1.3715	0.0176062	0.15031	chr14:68082590-68125004		22502.6	30862.7	-0.455772	38577	Non-regulated	No eCLIP peak	96129.3	1515	Non-regulated
Tor1b	-1.37118	0.0761208	0.357535	chr2:30952971-30959015		190.195	261.257	-0.457989	3018	Non-regulated	No eCLIP peak	78769.4	1516	Non-regulated
Pik3cd	-1.37112	0.0533984	0.290156	chr4:149649168-149701629		239.168	328.48	-0.457782	47589	Non-regulated	No eCLIP peak	90866.8	1517	Non-regulated
Reep3	-1.37091	0.0913968	0.397565	chr10:67009189-67096988		68.5661	93.6825	-0.450284	82327	Non-regulated	eCLIP Peak	100181	1518	Non-regulated
Gm2164	-1.37086	0.140259	0.509993	chr4:124522925-124657487		120.937	166.347	-0.459946	127822	Non-regulated	No eCLIP peak	78947.4	1519	Non-regulated
Map3k5	-1.37079	0.0779454	0.362009	chr10:19934472-20142750		366.337	502.43	-0.455752	202832	Non-regulated	No eCLIP peak	96187.8	1520	Non-regulated
Tle2	-1.37059	0.0698153	0.339583	chr10:81574561-81590845		197.242	270.692	-0.456685	12281	Non-regulated	No eCLIP peak	94299.2	1521	Non-regulated
Slc45a4	-1.37054	0.0218373	0.171364	chr15:73577419-73624745		1536.97	2106.39	-0.454684	39812	Non-regulated	eCLIP Peak	91526.8	1522	Non-regulated
Tnip1	-1.37028	0.0353749	0.228266	chr11:54910785-54962940		458.683	628.881	-0.45529	49158	Non-regulated	No eCLIP peak	95168.8	1523	Non-regulated
Fam163b	-1.3699	0.301345	0.735734	chr2:27110380-27142478		8031.51	11002.5	-0.454084	29153	Non-regulated	No eCLIP peak	99874.9	1524	Non-regulated
Hykk	-1.36987	0.427894	0.817678	chr9:54917281-54949924		27.8433	38.2306	-0.457396	27532	Non-regulated	No eCLIP peak	93038.5	1525	Non-regulated
Lmo7	-1.36986	0.0465358	0.268126	chr14:101729928-101934691		1830.42	2507.68	-0.454178	198662	Non-regulated	eCLIP Peak	95772.2	1526	Non-regulated
Syndig1l	-1.36981	0.0113557	0.115773	chr12:84677278-84698831		927.795	1270.75	-0.453807	19031	Non-regulated	No eCLIP peak	101040	1527	Non-regulated
Nsd2	-1.36977	0.0145086	0.1339	chr5:33820743-33897966		3943.18	5401.2	-0.453922	70100	Non-regulated	No eCLIP peak	101728	1528	Non-regulated
Pdzd8	-1.36962	0.006414	0.081542	chr19:59293231-59345780		4942.98	6769.86	-0.453744	42621	Non-regulated	No eCLIP peak	101311	1529	Non-regulated
Fam120a	-1.36956	0.0217877	0.17123	chr13:48879216-48968060		1546.23	2117.67	-0.453724	83694	Non-regulated	No eCLIP peak	103649	1530	Non-regulated
Pds5b	-1.36951	0.0121328	0.120465	chr5:150673827-150810704		1390.3	1903.43	-0.453207	129535	Non-regulated	eCLIP Peak	102384	1531	Non-regulated
Slc22a23	-1.36935	0.0069323	0.0848494	chr13:34179158-34345218		971.387	1329.5	-0.452768	159774	Non-regulated	eCLIP Peak	103948	1532	Non-regulated
Arhgap23	-1.36918	0.0010482	0.0278643	chr11:97450160-97502400		2416.43	3308.28	-0.453204	81054	Non-regulated	eCLIP Peak	101712	1533	Non-regulated
Vangl2	-1.36915	0.00706397	0.0857954	chr1:172000961-172028444		359.201	492.647	-0.455764	20957	Non-regulated	eCLIP Peak	96169.5	1534	Non-regulated
Ccdc9b	-1.36861	0.368404	0.788967	chr2:118754145-118762664		65.8243	90.4031	-0.457752	3801	Non-regulated	No eCLIP peak	92596.6	1535	Non-regulated
Atxn2l	-1.36854	0.00346178	0.0563057	chr7:126491708-126503437		4017.88	5498.8	-0.452683	7877	Non-regulated	No eCLIP peak	103072	1536	Non-regulated
Lpcat3	-1.36849	0.0643522	0.324149	chr6:124663104-124708413		158.749	217.421	-0.453741	39111	Non-regulated	No eCLIP peak	100900	1537	Non-regulated
Nphp4	-1.36835	0.0225219	0.174823	chr4:152476704-152563183		417.148	570.692	-0.452153	81879	Non-regulated	eCLIP Peak	103584	1538	Non-regulated
Atp2b3	-1.36834	0.0173186	0.149065	chrX:73503085-73573270		2740.69	3750.38	-0.452496	63437	Non-regulated	eCLIP Peak	103165	1539	Non-regulated
Sdc1	-1.36833	0.0820503	0.373272	chr12:8771354-8793688		155.81	213.691	-0.45574	19236	Non-regulated	No eCLIP peak	94387.6	1540	Non-regulated
Eml1	-1.3679	0.0469091	0.269504	chr12:108370957-108539617		438.658	600.562	-0.453216	134598	Non-regulated	eCLIP Peak	102920	1541	Non-regulated
Cep126	-1.36784	0.142358	0.513779	chr9:8076461-8134446		427.847	584.91	-0.45112	54015	Non-regulated	No eCLIP peak	100017	1542	Non-regulated
Bcl9	-1.36783	0.0696588	0.3392	chr3:97203662-97228330		273.621	374.448	-0.452587	80912	Non-regulated	No eCLIP peak	103292	1543	Non-regulated
Dzip3	-1.36734	0.0395703	0.243677	chr16:48921775-48994142		300.761	411.066	-0.450755	64114	Non-regulated	No eCLIP peak	99074.5	1544	Non-regulated
Mark1	-1.36721	0.00553018	0.0737529	chr1:184896424-184999954		6029.78	8244.18	-0.45127	98561	Non-regulated	eCLIP Peak	99939.7	1545	Non-regulated
Ppp4r1l-ps	-1.36713	0.0839863	0.378263	chr2:173579347-173659541		92.843	127.023	-0.452223	75754	Non-regulated	eCLIP Peak	103334	1546	Non-regulated
Tmem74bos	-1.36707	0.492955	0.845039	chr2:151679361-151686339		501.21	685.278	-0.451274	4889	Non-regulated	No eCLIP peak	99960.5	1547	Non-regulated
Rasgrp4	-1.36671	0.138057	0.504838	chr7:29134931-29153961		96.4919	132.225	-0.454511	14408	Non-regulated	No eCLIP peak	91538.2	1548	Non-regulated
Nr2c2	-1.36659	0.00123353	0.0308368	chr6:92091418-92174294		6250.74	8541.31	-0.45043	74021	Non-regulated	No eCLIP peak	100729	1549	Non-regulated
Grk3	-1.36658	0.00674774	0.0838921	chr5:112910478-113015793		489.161	668.708	-0.451066	98500	Non-regulated	eCLIP Peak	99868.6	1550	Non-regulated
Ppfibp2	-1.36653	0.0903487	0.395447	chr7:107595051-107748583		211.249	288.942	-0.451838	146310	Non-regulated	No eCLIP peak	102845	1551	Non-regulated
Antxr1	-1.36621	0.228398	0.657862	chr6:87133854-87335822		82.2969	112.523	-0.451307	196659	Non-regulated	eCLIP Peak	101777	1552	Non-regulated
Hdlbp	-1.36608	0.0347669	0.22587	chr1:93405940-93478917		11543.9	15770.1	-0.450056	66631	Non-regulated	No eCLIP peak	101563	1553	Non-regulated
Minar1	-1.366	0.0316591	0.213547	chr9:89587216-89623343		1982.98	2708.68	-0.449922	28708	Non-regulated	No eCLIP peak	101114	1554	Non-regulated
Optn	-1.3656	0.0183705	0.154361	chr2:5020642-5064117		2238.88	3057.18	-0.44942	40790	Non-regulated	No eCLIP peak	108858	1555	Non-regulated
Otud7b	-1.36532	0.0199521	0.16201	chr3:96104525-96161129		578.412	790.14	-0.450011	48560	Non-regulated	No eCLIP peak	101079	1556	Non-regulated
Lmtk3	-1.36524	0.0202425	0.163707	chr7:45782606-45804144		4741.08	6473.63	-0.44936	15356	Non-regulated	eCLIP Peak	108552	1557	Non-regulated
Nrcam	-1.3652	0.0219773	0.172078	chr12:44328885-44601964		9231.7	12602.9	-0.449084	265600	Non-regulated	eCLIP Peak	108507	1558	Non-regulated
Lrrc20	-1.36508	0.000415894	0.015773	chr10:61475800-61582790		5184.49	7077.58	-0.449055	103775	Non-regulated	No eCLIP peak	109055	1559	Non-regulated
Tbc1d2b	-1.36496	0.0662644	0.3299	chr9:90202027-90270772		223.147	304.879	-0.45024	62787	Non-regulated	eCLIP Peak	100912	1560	Non-regulated
Zc3h4	-1.36486	0.00365052	0.058015	chr7:16401196-16437694		4939.79	6742.87	-0.448913	30637	Non-regulated	No eCLIP peak	108907	1561	Non-regulated
Ubr2	-1.36483	0.0803726	0.368669	chr17:46928292-47010558		401.603	548.109	-0.448693	74593	Non-regulated	eCLIP Peak	108687	1562	Non-regulated
Rgp1	-1.36459	0.0447457	0.262533	chr4:43578735-43587487		536.121	730.946	-0.447207	2885	Non-regulated	No eCLIP peak	107734	1563	Non-regulated
Man1c1	-1.36424	3.04468e-05	0.00309909	chr4:134561690-134704290		2128.47	2902.97	-0.44771	138316	Non-regulated	eCLIP Peak	108914	1564	Non-regulated
Igfbp5	-1.36407	0.0290415	0.203594	chr1:72857934-72874886		42360.4	57782.3	-0.447912	10947	Non-regulated	No eCLIP peak	108080	1565	Non-regulated
Klhl18	-1.36389	0.00852708	0.0967854	chr9:110425927-110476694		892.323	1216.87	-0.447536	46239	Non-regulated	No eCLIP peak	107838	1566	Non-regulated
Abcd2	-1.36379	0.0264807	0.192928	chr15:91145678-91192007		149.278	202.969	-0.44326	40397	Non-regulated	No eCLIP peak	100526	1567	Non-regulated
Meak7	-1.36358	0.0291627	0.204064	chr8:119760133-119778417		311.326	425.217	-0.449774	15256	Non-regulated	eCLIP Peak	106576	1568	Non-regulated
Nfrkb	-1.36331	0.0296392	0.20524	chr9:31386192-31421331		1165.47	1589.05	-0.447256	29981	Non-regulated	No eCLIP peak	107727	1569	Non-regulated
Pak3	-1.36317	0.013024	0.125446	chrX:143518590-143797796		779.483	1062.63	-0.447055	270854	Non-regulated	eCLIP Peak	107709	1570	Non-regulated
Chadl	-1.36307	0.207652	0.626183	chr15:81678296-81697287		137.369	187.64	-0.449916	12455	Non-regulated	No eCLIP peak	106490	1571	Non-regulated
Sstr3	-1.36301	0.576112	0.885348	chr15:78537015-78544346		431.115	587.674	-0.446943	3403	Non-regulated	No eCLIP peak	105173	1572	Non-regulated
Otud7a	-1.36204	0.00300065	0.0520234	chr7:63444772-63759027		2973.09	4049.94	-0.445936	310795	Non-regulated	eCLIP Peak	108150	1573	Non-regulated
Dip2c	-1.3618	0.0566753	0.299881	chr13:9276525-9668928		1042.88	1419.97	-0.44529	384378	Non-regulated	eCLIP Peak	104914	1574	Non-regulated
Zfas1	-1.36169	0.0952981	0.408604	chr2:167062934-167065861		798.431	1087.8	-0.446169	2191	Non-regulated	No eCLIP peak	108100	1575	Non-regulated
Cul7	-1.36169	0.0141985	0.132081	chr17:46650335-46664366		422.061	575.159	-0.446509	8498	Non-regulated	No eCLIP peak	106324	1576	Non-regulated
1700013F07Rik	-1.3616	0.324095	0.750602	chr3:108537546-108544723		35.7955	49.0379	-0.454119	6522	Non-regulated	No eCLIP peak	94518.5	1577	Non-regulated
Arl14epl	-1.36149	0.187707	0.59455	chr18:46921815-46934222		125.512	170.729	-0.443884	10161	Non-regulated	No eCLIP peak	99282	1578	Non-regulated
Brinp2	-1.36132	0.122166	0.469756	chr1:158245266-158356326		1000.49	1362.29	-0.445328	106891	Non-regulated	eCLIP Peak	105286	1579	Non-regulated
Zfp354b	-1.36099	0.0228832	0.176283	chr11:50921786-50931637		162.595	221.461	-0.44577	7356	Non-regulated	No eCLIP peak	105254	1580	Non-regulated
N6amt1	-1.36083	0.0386328	0.240082	chr16:87354185-87368649		1198.75	1631.69	-0.444843	12674	Non-regulated	No eCLIP peak	102371	1581	Non-regulated
Sorcs3	-1.36065	0.0548473	0.295182	chr19:48206018-48805505		3137.86	4269.21	-0.444189	593847	Non-regulated	eCLIP Peak	103654	1582	Non-regulated
Zscan18	-1.36046	0.0535456	0.290655	chr7:12768092-12803638		612.717	833.581	-0.444101	31876	Non-regulated	No eCLIP peak	99380.8	1583	Non-regulated
Ascc2	-1.36034	0.0793496	0.365945	chr11:4637745-4686658		425.631	579.201	-0.444463	43109	Non-regulated	eCLIP Peak	103717	1584	Non-regulated
Simc1	-1.35977	0.0408804	0.24871	chr13:54503805-54551298		187.366	254.408	-0.441283	45396	Non-regulated	No eCLIP peak	103815	1585	Non-regulated
R3hdm1	-1.35931	0.0377638	0.236603	chr1:128103299-128237738		12649	17193.4	-0.442832	129618	Non-regulated	No eCLIP peak	99334.5	1586	Non-regulated
Carf	-1.35929	0.00350254	0.0567055	chr1:60048642-60153952		509.009	692.683	-0.444504	50023	Non-regulated	No eCLIP peak	102982	1587	Non-regulated
Heatr6	-1.35908	0.241765	0.672378	chr11:83753637-83783754		66.229	90.3904	-0.448706	24445	Non-regulated	No eCLIP peak	108734	1588	Non-regulated
Evi5	-1.35905	0.031881	0.214516	chr5:107744795-107875107		1718.73	2335.66	-0.442492	124464	Non-regulated	No eCLIP peak	98512	1589	Non-regulated
Wbp1l	-1.35897	0.0141427	0.131744	chr19:46599106-46657387		3024.93	4110.09	-0.442266	54406	Non-regulated	eCLIP Peak	97522.2	1590	Non-regulated
Oasl2	-1.35884	0.276547	0.706334	chr5:114896934-114912245		50.604	68.6207	-0.439392	12176	Non-regulated	No eCLIP peak	96141.8	1591	Non-regulated
Nbas	-1.35882	0.00139793	0.0332657	chr12:13269127-13583810		434.031	590.03	-0.442991	307445	Non-regulated	eCLIP Peak	100421	1592	Non-regulated
Stat5a	-1.35873	0.151369	0.530995	chr11:100859351-100885168		102.068	139.236	-0.447994	21931	Non-regulated	No eCLIP peak	108055	1593	Non-regulated
Dmrtb1	-1.35857	0.006641	0.0833201	chr4:107676290-107684230		532.317	722.784	-0.44128	6078	Non-regulated	No eCLIP peak	107729	1594	Non-regulated
Zfp40	-1.35856	0.125323	0.476439	chr17:23173869-23193252		163.348	221.21	-0.437469	15281	Non-regulated	No eCLIP peak	94103.8	1595	Non-regulated
Phlpp2	-1.35851	0.132177	0.492759	chr8:109868540-109944671		130.04	176.674	-0.442142	68222	Non-regulated	No eCLIP peak	97801.5	1596	Non-regulated
5031439G07Rik	-1.35824	0.00765276	0.090271	chr15:84943936-84988004		833.15	1131.7	-0.44185	37220	Non-regulated	eCLIP Peak	97542.4	1597	Non-regulated
Usp48	-1.35822	0.0148677	0.135789	chr4:137593751-137658536		2205.7	2995.61	-0.441613	58651	Non-regulated	No eCLIP peak	100511	1598	Non-regulated
Tmem151b	-1.35807	0.0147741	0.135164	chr17:45541940-45549677		627.564	853.117	-0.442981	2887	Non-regulated	No eCLIP peak	98299.9	1599	Non-regulated
Tpbg	-1.35802	0.503908	0.845039	chr9:85842377-85847055		678.885	922.024	-0.441637	1058	Non-regulated	No eCLIP peak	100251	1600	Non-regulated
Msh3	-1.35786	0.00600872	0.0783144	chr13:92211872-92355003		759.618	1031.11	-0.440857	139178	Non-regulated	No eCLIP peak	108490	1601	Non-regulated
Gfod1	-1.35757	0.00378817	0.0592036	chr13:43195249-43304174		2200.65	2987.8	-0.441154	102000	Non-regulated	eCLIP Peak	109718	1602	Non-regulated
Adgrb1	-1.3574	0.0186817	0.155824	chr15:74516192-74589464		4925.76	6686.71	-0.440949	67042	Non-regulated	eCLIP Peak	108912	1603	Non-regulated
Grid1	-1.35709	0.0262167	0.191642	chr14:34820136-35581114		2555.85	3468.44	-0.440482	757552	Non-regulated	eCLIP Peak	107754	1604	Non-regulated
Klhl3	-1.35701	0.0190068	0.157661	chr13:58000227-58113647		2197.31	2982.12	-0.440597	106216	Non-regulated	eCLIP Peak	108135	1605	Non-regulated
Gm6277	-1.35675	0.105111	0.432809	chr18:11820676-11840870		68.8752	93.7593	-0.444976	16868	Non-regulated	No eCLIP peak	101316	1606	Non-regulated
Olfm2	-1.3567	0.40873	0.799097	chr9:20667690-20746296		579.422	786.214	-0.440309	76762	Non-regulated	No eCLIP peak	102801	1607	Non-regulated
Ptprk	-1.35655	0.141447	0.512113	chr10:28074820-28597397		468.993	636.268	-0.440067	516401	Non-regulated	eCLIP Peak	102204	1608	Non-regulated
Dnm3	-1.35615	0.0467784	0.269106	chr1:161987304-162478036		3604.59	4888.65	-0.439603	483210	Non-regulated	eCLIP Peak	95358.7	1609	Non-regulated
Eml6	-1.35609	0.0887286	0.391627	chr11:29743051-30026033		818.814	1110.25	-0.439277	274903	Non-regulated	eCLIP Peak	96097.5	1610	Non-regulated
Vwa5b2	-1.35592	0.0103129	0.108798	chr16:20589581-20605377		707.439	959.401	-0.439528	11269	Non-regulated	eCLIP Peak	93016.6	1611	Non-regulated
Senp1	-1.3558	0.00811224	0.0934921	chr15:98038744-98093570		292.331	396.578	-0.44	48426	Non-regulated	No eCLIP peak	95427.5	1612	Non-regulated
Tst	-1.35508	0.232192	0.66251	chr15:78399556-78405866		114.09	154.966	-0.441782	5208	Non-regulated	No eCLIP peak	100057	1613	Non-regulated
Epg5	-1.35462	0.0390047	0.241467	chr18:77938466-78037321		4041.49	5474.75	-0.437905	86889	Non-regulated	No eCLIP peak	94962.6	1614	Non-regulated
Nuak2	-1.35462	0.431394	0.82066	chr1:132316125-132333488		40.7892	55.5747	-0.446242	14256	Non-regulated	No eCLIP peak	107262	1615	Non-regulated
Pik3c2a	-1.35461	0.0210565	0.167486	chr7:116337276-116443458		425.302	575.723	-0.436887	98141	Non-regulated	No eCLIP peak	94854.3	1616	Non-regulated
Pgm2l1	-1.35421	0.0191857	0.158573	chr7:100227394-100278871		1759.81	2383.17	-0.437458	42640	Non-regulated	No eCLIP peak	94129.9	1617	Non-regulated
Atxn7l1	-1.35418	0.020295	0.163908	chr12:33146968-33376397		412.1	559.067	-0.440027	222304	Non-regulated	eCLIP Peak	97548.5	1618	Non-regulated
Pip5k1c	-1.3541	0.00111826	0.028933	chr10:81292963-81319973		13625.4	18450.2	-0.437346	22802	Non-regulated	eCLIP Peak	94358.7	1619	Non-regulated
Fam193b	-1.35408	0.0327335	0.218486	chr13:55539317-55571120		369.741	501.301	-0.439163	27464	Non-regulated	eCLIP Peak	94544.7	1620	Non-regulated
Pml	-1.35345	0.0310902	0.211564	chr9:58217179-58249788		244.276	330.493	-0.436105	27230	Non-regulated	eCLIP Peak	94546.9	1621	Non-regulated
5033417F24Rik	-1.35343	0.0844217	0.379319	chr1:92908379-92910767		81.7213	110.468	-0.434841	600	Non-regulated	No eCLIP peak	95924.5	1622	Non-regulated
Mxd1	-1.35274	0.00194285	0.0400261	chr6:86647044-86669159		1935.95	2619.4	-0.436195	17454	Non-regulated	No eCLIP peak	94094.8	1623	Non-regulated
Gfap	-1.35266	0.366696	0.787232	chr11:102887337-102897200		46.1431	62.3131	-0.433422	7148	Non-regulated	No eCLIP peak	90213.3	1624	Non-regulated
Ints2	-1.3522	0.0502473	0.280508	chr11:86210681-86257594		423.781	573.023	-0.435274	40964	Non-regulated	No eCLIP peak	95873.9	1625	Non-regulated
Rnasel	-1.35218	0.0286571	0.202292	chr1:153749425-153764221		444.434	600.646	-0.434546	10038	Non-regulated	No eCLIP peak	94776.4	1626	Non-regulated
Reln	-1.35217	0.0653104	0.327216	chr5:21884454-22344706		47319.5	63983.9	-0.435273	448550	Non-regulated	eCLIP Peak	97468.7	1627	Non-regulated
Dhrs3	-1.35187	0.0822141	0.373596	chr4:144892827-144928209		1421	1921.29	-0.435174	32796	Non-regulated	No eCLIP peak	95896.9	1628	Non-regulated
Rnf157	-1.35185	0.00249705	0.0462664	chr11:116336343-116413033		39644.7	53593.8	-0.434937	72033	Non-regulated	eCLIP Peak	96278.8	1629	Non-regulated
Sorbs1	-1.35184	0.0241816	0.181979	chr19:40292040-40513812		2959.68	4000.79	-0.434842	216302	Non-regulated	eCLIP Peak	97181.1	1630	Non-regulated
Dhx34	-1.35182	0.0138703	0.130457	chr7:16197129-16222033		494.167	669.079	-0.437178	21011	Non-regulated	No eCLIP peak	94511.8	1631	Non-regulated
Nbea	-1.35179	0.0523825	0.28661	chr3:55625201-56183701		13908.8	18801.8	-0.434873	547521	Non-regulated	eCLIP Peak	99339.3	1632	Non-regulated
Neurod2	-1.35161	0.067081	0.332256	chr11:98325417-98329777		2387.47	3227.04	-0.434731	1092	Non-regulated	No eCLIP peak	96612.8	1633	Non-regulated
Pik3ca	-1.35134	0.0580458	0.304006	chr3:32397065-32468494		1854.23	2505.4	-0.434222	61748	Non-regulated	No eCLIP peak	94434.6	1634	Non-regulated
Abl2	-1.35131	0.00594539	0.0777459	chr1:156558787-156649619		2592.49	3502.99	-0.434249	80431	Non-regulated	No eCLIP peak	95096.1	1635	Non-regulated
Shisa6	-1.35113	0.0373749	0.235019	chr11:66211725-66526127		8916.91	12047.8	-0.434157	306819	Non-regulated	eCLIP Peak	94419.2	1636	Non-regulated
Rgs16	-1.351	0.0345389	0.224988	chr1:153740351-153745468		516.879	697.944	-0.433285	2781	Non-regulated	No eCLIP peak	91105.6	1637	Non-regulated
Mamld1	-1.35084	0.0133784	0.127845	chrX:71050255-71154717		1210.25	1634.42	-0.433478	101005	Non-regulated	eCLIP Peak	90892	1638	Non-regulated
Ccdc93	-1.35082	0.0645068	0.324488	chr1:121431049-121506458		371.203	501.323	-0.433532	68138	Non-regulated	eCLIP Peak	91177.9	1639	Non-regulated
Kcnq1	-1.35071	0.799095	0.934949	chr7:143106362-143427050		28.2555	38.1903	-0.434674	316760	Non-regulated	No eCLIP peak	97616.7	1640	Non-regulated
Dhx8	-1.35067	0.019264	0.15888	chr11:101732955-101769006		1590.88	2148.91	-0.43378	30084	Non-regulated	No eCLIP peak	91453.5	1641	Non-regulated
Nup214	-1.35066	0.0103861	0.109068	chr2:31974450-32053975		1985.63	2682.13	-0.433781	71331	Non-regulated	No eCLIP peak	91690.1	1642	Non-regulated
Map7d2	-1.35057	0.0170665	0.147994	chrX:159414572-159498755		3782.83	5108.82	-0.433524	80516	Non-regulated	No eCLIP peak	91613.5	1643	Non-regulated
Grin2c	-1.35033	0.0128282	0.124557	chr11:115249169-115267304		2241.72	3027.13	-0.433343	13180	Non-regulated	eCLIP Peak	90641.4	1644	Non-regulated
Ube2o	-1.35017	0.0285788	0.202011	chr11:116537741-116581447		1278.95	1727.13	-0.433412	38503	Non-regulated	eCLIP Peak	90165.9	1645	Non-regulated
Slc43a2	-1.35001	0.0234992	0.179084	chr11:75531694-75577570		3131.95	4228.41	-0.433055	38987	Non-regulated	eCLIP Peak	90613.3	1646	Non-regulated
Ralgps2	-1.34987	0.0429694	0.256402	chr1:156804166-156939626		805.034	1086.05	-0.431964	128574	Non-regulated	No eCLIP peak	87896.1	1647	Non-regulated
Ctif	-1.34974	0.00266252	0.0484374	chr18:75431224-75697696		2320.4	3132.1	-0.432752	260300	Non-regulated	eCLIP Peak	90858.9	1648	Non-regulated
Rbbp8	-1.34966	0.0727865	0.348302	chr18:11633276-11745221		161.426	217.957	-0.433172	106409	Non-regulated	No eCLIP peak	91629.3	1649	Non-regulated
Ifnar1	-1.34959	0.00203597	0.0411517	chr16:91485215-91510520		749.945	1012.47	-0.433021	18295	Non-regulated	No eCLIP peak	90289.6	1650	Non-regulated
Wdr90	-1.34947	0.0138897	0.130594	chr17:25844734-25861515		429.026	578.352	-0.430882	10768	Non-regulated	eCLIP Peak	85686.1	1651	Non-regulated
Chd1l	-1.3494	0.134602	0.497214	chr3:97560742-97610214		131.122	177.233	-0.434735	46454	Non-regulated	No eCLIP peak	96846.5	1652	Non-regulated
Rsrc2	-1.34932	0.0136126	0.129133	chr5:123728426-123749414		1421.25	1917.71	-0.432232	18713	Non-regulated	No eCLIP peak	88680.1	1653	Non-regulated
Cers6	-1.34912	0.118691	0.462919	chr2:68861440-69114283		150.823	203.353	-0.431126	245804	Non-regulated	eCLIP Peak	84497.1	1654	Non-regulated
Osbp2	-1.34909	0.00417012	0.0625697	chr11:3703731-3863904		3201.28	4319.11	-0.432084	156076	Non-regulated	eCLIP Peak	89212.3	1655	Non-regulated
Zfp74	-1.34862	0.0335977	0.221533	chr7:29930815-29954066		454.843	613.288	-0.431195	21099	Non-regulated	No eCLIP peak	84377	1656	Non-regulated
Prpf40b	-1.34832	0.0333922	0.220855	chr15:99295238-99317018		1199.4	1617.53	-0.431483	17715	Non-regulated	eCLIP Peak	89335.2	1657	Non-regulated
Arhgef17	-1.34829	0.00402797	0.061536	chr7:100869746-100932161		3084.39	4159.51	-0.431426	52166	Non-regulated	eCLIP Peak	89183.9	1658	Non-regulated
Cadps2	-1.34818	0.430142	0.819543	chr6:23262773-23839421		311.922	420.613	-0.431309	571680	Non-regulated	No eCLIP peak	89151.5	1659	Non-regulated
Slc26a11	-1.34811	0.106009	0.434853	chr11:119355557-119381076		80.6032	109.174	-0.437717	22828	Non-regulated	No eCLIP peak	94186.6	1660	Non-regulated
Nedd4l	-1.34773	0.013388	0.127897	chr18:64887756-65217826		1777.85	2396.32	-0.430687	321013	Non-regulated	eCLIP Peak	87032.3	1661	Non-regulated
Pou6f1	-1.34763	1.88743e-05	0.00240145	chr15:100575319-100599984		7764.8	10463.2	-0.43031	19714	Non-regulated	No eCLIP peak	84051.1	1662	Non-regulated
Ubtf	-1.3476	0.00847057	0.0962825	chr11:102304560-102320862		1347.34	1816.52	-0.43106	9845	Non-regulated	No eCLIP peak	85122.2	1663	Non-regulated
D5Ertd579e	-1.34745	0.10021	0.42194	chr5:36600492-36696025		446.474	601.742	-0.430571	88776	Non-regulated	No eCLIP peak	84126.5	1664	Non-regulated
Zfp862-ps	-1.34737	0.122008	0.469436	chr6:48504336-48534831		381.9	514.51	-0.430005	24380	Non-regulated	No eCLIP peak	84397.3	1665	Non-regulated
Rnf40	-1.34731	0.0185528	0.155282	chr7:127588698-127603957		2743.85	3697.33	-0.430284	10754	Non-regulated	eCLIP Peak	84484.5	1666	Non-regulated
Rbm6	-1.34695	0.0162035	0.143438	chr9:107773559-107872819		1772.08	2387.07	-0.429796	95272	Non-regulated	No eCLIP peak	85049.4	1667	Non-regulated
Otud4	-1.3466	0.00013343	0.00794386	chr8:79639676-79677755		1743.94	2348.15	-0.429172	30753	Non-regulated	No eCLIP peak	84823.8	1668	Non-regulated
Plekhm2	-1.34655	0.00274438	0.0492656	chr4:141625735-141664903		3964.16	5338	-0.429285	35012	Non-regulated	No eCLIP peak	85038	1669	Non-regulated
Dock4	-1.34633	0.34619	0.770902	chr12:40446036-40846495		51.835	69.5584	-0.4243	392371	Non-regulated	eCLIP Peak	80193.1	1670	Non-regulated
Slc38a3	-1.34597	0.0109073	0.112706	chr9:107650639-107669003		7300.31	9825.9	-0.428631	14714	Non-regulated	eCLIP Peak	86362.4	1671	Non-regulated
Calhm2	-1.34579	0.627573	0.905642	chr19:47105351-47138295		61.9873	83.4877	-0.429592	29565	Non-regulated	No eCLIP peak	84351	1672	Non-regulated
Atxn2	-1.34576	0.00521603	0.0709732	chr5:121711609-121814950		4385.85	5902.42	-0.428452	98870	Non-regulated	eCLIP Peak	88840.9	1673	Non-regulated
Cdh22	-1.34533	0.00980023	0.105358	chr2:165111507-165234855		1836.82	2472.11	-0.428539	119645	Non-regulated	eCLIP Peak	86225.9	1674	Non-regulated
Rd3	-1.3452	0.58474	0.893366	chr1:191977370-191988282		527.279	709.383	-0.427999	7190	Non-regulated	No eCLIP peak	88629.7	1675	Non-regulated
4933421O10Rik	-1.34518	0.0172514	0.148745	chr4:33027139-33031323		420.894	566.653	-0.429009	335	Non-regulated	No eCLIP peak	85756.5	1676	Non-regulated
Pygm	-1.34513	0.118484	0.462538	chr19:6384408-6398464		108.151	145.937	-0.432301	11187	Non-regulated	No eCLIP peak	88669.5	1677	Non-regulated
Prr12	-1.34491	0.0233685	0.17854	chr7:45027701-45053334		2300.34	3094.4	-0.427812	18296	Non-regulated	No eCLIP peak	88870.9	1678	Non-regulated
Opa1	-1.34471	0.0320613	0.215384	chr16:29579334-29654602		1256.35	1689.4	-0.42727	69321	Non-regulated	eCLIP Peak	89398.8	1679	Non-regulated
Inppl1	-1.34467	0.00796742	0.0925123	chr7:101822645-101838226		1161.79	1562.62	-0.427623	10603	Non-regulated	No eCLIP peak	89370.8	1680	Non-regulated
Nynrin	-1.34454	0.141847	0.512784	chr14:55854036-55874741		64.8561	87.4008	-0.430404	13209	Non-regulated	No eCLIP peak	83416	1681	Non-regulated
Map7d1	-1.34443	0.0125996	0.123239	chr4:126232167-126256319		14681.9	19739.5	-0.427051	20982	Non-regulated	No eCLIP peak	88985.4	1682	Non-regulated
Rrp1b	-1.34403	0.092085	0.399454	chr17:32036162-32066552		269.749	362.423	-0.426055	21892	Non-regulated	No eCLIP peak	85154.3	1683	Non-regulated
Zfp644	-1.34402	0.0665002	0.330709	chr5:106616741-106696831		1475.98	1983.5	-0.426374	74307	Non-regulated	No eCLIP peak	88072.8	1684	Non-regulated
Card11	-1.34391	0.183099	0.587205	chr5:140872991-141000596		48.3857	65.0317	-0.426562	123486	Non-regulated	No eCLIP peak	89143.6	1685	Non-regulated
Ttll7	-1.34383	0.0192223	0.158695	chr3:146852367-146984006		12758.2	17144.8	-0.426342	124249	Non-regulated	eCLIP Peak	87522.2	1686	Non-regulated
Tcaf1	-1.34355	0.0232167	0.177854	chr6:42668002-42710115		7305.89	9816.08	-0.426088	36830	Non-regulated	No eCLIP peak	86334	1687	Non-regulated
Mtss1	-1.34346	0.0455814	0.265364	chr15:58941234-59082026		2922.21	3926.03	-0.42601	135818	Non-regulated	eCLIP Peak	85086.1	1688	Non-regulated
Hnrnpul1	-1.3432	0.000473513	0.0170562	chr7:25721163-25754763		6374.55	8563.47	-0.425872	29809	Non-regulated	No eCLIP peak	83911.5	1689	Non-regulated
Abcc1	-1.34319	0.143681	0.51637	chr16:14361557-14475728		151.125	202.961	-0.425464	107386	Non-regulated	No eCLIP peak	83261.4	1690	Non-regulated
A430033K04Rik	-1.34318	0.0400481	0.245613	chr5:138622858-138652414		518.078	695.245	-0.424353	27275	Non-regulated	No eCLIP peak	80441.3	1691	Non-regulated
Dpysl5	-1.34294	0.0505047	0.281211	chr5:30711564-30799369		396.818	532.796	-0.425107	82621	Non-regulated	eCLIP Peak	81932.4	1692	Non-regulated
Pip4k2b	-1.34289	0.00223442	0.0435484	chr11:97715158-97744754		3281.58	4406.56	-0.425262	24495	Non-regulated	No eCLIP peak	82086.3	1693	Non-regulated
Helb	-1.34211	0.174606	0.572357	chr10:120083608-120112987		42.3787	56.8748	-0.42445	24826	Non-regulated	No eCLIP peak	79828.9	1694	Non-regulated
Brd1	-1.34208	0.0220398	0.172381	chr15:88687035-88734233		788.461	1058.43	-0.424818	42048	Non-regulated	No eCLIP peak	81873.1	1695	Non-regulated
Myo1b	-1.34201	0.0889927	0.392323	chr1:51749758-51915978		147.001	196.594	-0.41939	161255	Non-regulated	No eCLIP peak	73272.9	1696	Non-regulated
Lzts1	-1.34194	0.111656	0.447505	chr8:69132659-69184215		296.541	398.213	-0.425308	46538	Non-regulated	eCLIP Peak	82281.5	1697	Non-regulated
Epb41l4a	-1.34178	0.0497103	0.278855	chr18:33796327-34007206		2035.28	2730.96	-0.424184	207027	Non-regulated	eCLIP Peak	73088.3	1698	Non-regulated
Klhl29	-1.34173	0.000732642	0.0224704	chr12:5077465-5375682		1176.89	1579.82	-0.424774	291170	Non-regulated	eCLIP Peak	81752.6	1699	Non-regulated
Prkcg	-1.34163	0.320608	0.750602	chr7:3303522-3331095		7362.28	9877.55	-0.424001	24451	Non-regulated	No eCLIP peak	76747.7	1700	Non-regulated
Rnf20	-1.34148	0.0244645	0.183361	chr4:49632060-49656886		894.391	1200.05	-0.424123	20515	Non-regulated	No eCLIP peak	76698.4	1701	Non-regulated
Sema5a	-1.34124	0.103933	0.430438	chr15:32244801-32696341		478.029	641.442	-0.424223	440720	Non-regulated	eCLIP Peak	76366.9	1702	Non-regulated
Wapl	-1.34113	0.0107474	0.111701	chr14:34673894-34747976		1555.14	2085.2	-0.423142	67705	Non-regulated	No eCLIP peak	78245.3	1703	Non-regulated
Rnf144a	-1.3411	0.228279	0.657819	chr12:26306794-26415262		56.0033	75.3714	-0.428506	103297	Non-regulated	No eCLIP peak	85072.8	1704	Non-regulated
1700028P14Rik	-1.34103	0.404	0.793776	chr19:23558760-23652815		39.3142	52.8007	-0.425508	93185	Non-regulated	No eCLIP peak	84162	1705	Non-regulated
Mllt3	-1.34072	0.0171244	0.148216	chr4:87769926-88033407		2103.26	2819.45	-0.422791	257371	Non-regulated	eCLIP Peak	77702.2	1706	Non-regulated
Kazn	-1.34071	0.00214872	0.0426151	chr4:142102391-142239402		2185.39	2930.48	-0.423248	103318	Non-regulated	eCLIP Peak	79199.2	1707	Non-regulated
Gnaz	-1.34032	0.0174645	0.149688	chr10:74967177-75016904		4721.45	6328.35	-0.422602	46212	Non-regulated	eCLIP Peak	76498.3	1708	Non-regulated
Slc30a10	-1.33993	0.609219	0.905642	chr1:185454847-185468762		95.6868	128.223	-0.42226	8079	Non-regulated	No eCLIP peak	76324.8	1709	Non-regulated
Gigyf2	-1.33937	0.026614	0.193453	chr1:87326998-87450810		1073.68	1438.1	-0.421599	118070	Non-regulated	No eCLIP peak	72756.9	1710	Non-regulated
Knop1	-1.33915	0.0251739	0.18664	chr7:118842220-118856257		514.805	689.373	-0.421259	8509	Non-regulated	No eCLIP peak	72551.1	1711	Non-regulated
Ccdc92b	-1.33894	0.000938988	0.0259546	chr11:74619605-74641516		3792.55	5077.87	-0.421056	17910	Non-regulated	No eCLIP peak	73085	1712	Non-regulated
Pdxdc1	-1.33894	0.0224176	0.174357	chr16:13831237-13903145		3506.15	4694.4	-0.421052	65752	Non-regulated	No eCLIP peak	73141.7	1713	Non-regulated
Gfpt2	-1.33892	0.061063	0.313886	chr11:49794155-49838620		211.149	282.919	-0.422129	41480	Non-regulated	No eCLIP peak	76335.6	1714	Non-regulated
Gcc1	-1.3387	0.0303257	0.208429	chr6:28416603-28428392		353.93	474.11	-0.421757	7703	Non-regulated	No eCLIP peak	72473.3	1715	Non-regulated
Ttbk1	-1.33867	0.00842424	0.0959633	chr17:46442448-46487675		2725.36	3648.8	-0.420976	38269	Non-regulated	No eCLIP peak	73256.6	1716	Non-regulated
Map3k9	-1.33819	0.00218604	0.0429639	chr12:81714950-81781175		3655.5	4892.06	-0.420375	55602	Non-regulated	No eCLIP peak	72913.7	1717	Non-regulated
Unc5b	-1.33802	0.0779144	0.361918	chr10:60762610-60831584		576.532	771.367	-0.420016	63120	Non-regulated	No eCLIP peak	72683.6	1718	Non-regulated
Kcnj6	-1.33753	0.0318072	0.214198	chr16:94744981-94997703		217.612	291.544	-0.421953	246658	Non-regulated	eCLIP Peak	76022.1	1719	Non-regulated
Bmpr1b	-1.33752	0.0618276	0.315834	chr3:141837144-142169425		378.548	507.12	-0.421852	326911	Non-regulated	eCLIP Peak	73812	1720	Non-regulated
Zfp804a	-1.33741	0.0726405	0.34792	chr2:82053657-82259876		8843	11825.9	-0.419347	202038	Non-regulated	eCLIP Peak	73067.2	1721	Non-regulated
Aqp5	-1.33735	0.534835	0.854544	chr15:99590780-99594829		51.4433	68.6341	-0.415942	2251	Non-regulated	No eCLIP peak	83147.8	1722	Non-regulated
Ophn1	-1.3371	0.043992	0.259781	chrX:98554281-98891026		751.424	1004.53	-0.418821	329539	Non-regulated	No eCLIP peak	81596.9	1723	Non-regulated
Asap1	-1.33705	0.0659242	0.329188	chr15:64086840-64382919		16214.2	21679.2	-0.419052	289799	Non-regulated	eCLIP Peak	71407.7	1724	Non-regulated
Ppp6r2	-1.33703	0.00676325	0.0839526	chr15:89211558-89287015		2646.92	3538.93	-0.418998	71367	Non-regulated	No eCLIP peak	75702.6	1725	Non-regulated
Tmtc2	-1.33671	0.040584	0.247663	chr10:105187666-105574479		933.15	1247.52	-0.418887	381144	Non-regulated	eCLIP Peak	75812.6	1726	Non-regulated
Pcp4l1	-1.33647	0.0429207	0.256305	chr1:171173263-171197035		256.203	342.841	-0.420254	21430	Non-regulated	No eCLIP peak	72526.5	1727	Non-regulated
Ppfia3	-1.33644	0.00598233	0.0781234	chr7:45339122-45367019		7286.81	9739.1	-0.4185	22854	Non-regulated	No eCLIP peak	77839.3	1728	Non-regulated
Smarcc1	-1.33644	0.0449086	0.263135	chr9:110132024-110240707		1464.32	1956.88	-0.418329	102482	Non-regulated	No eCLIP peak	77911.5	1729	Non-regulated
Dtx4	-1.33636	0.147831	0.524082	chr19:12466334-12501996		86.1376	115.097	-0.418131	29891	Non-regulated	No eCLIP peak	76917	1730	Non-regulated
Timeless	-1.33535	0.413933	0.803818	chr10:128232063-128252935		51.6279	69.2077	-0.422781	16420	Non-regulated	No eCLIP peak	76607.8	1731	Non-regulated
Gemin5	-1.3351	0.0440319	0.259781	chr11:58120001-58168539		618.1	825.476	-0.417386	42325	Non-regulated	No eCLIP peak	77139.2	1732	Non-regulated
Kansl1l	-1.33477	0.0470566	0.269968	chr1:66719243-66817595		145.943	195.085	-0.418692	93725	Non-regulated	No eCLIP peak	78476.5	1733	Non-regulated
Lpin2	-1.3347	0.0339386	0.222826	chr17:71182558-71249818		6580.92	8783.23	-0.416463	60200	Non-regulated	eCLIP Peak	81272.9	1734	Non-regulated
Jade3	-1.3345	0.077519	0.360825	chrX:20425688-20519937		101.822	136.112	-0.418734	89386	Non-regulated	No eCLIP peak	78591.4	1735	Non-regulated
Proser1	-1.33448	0.0266347	0.193558	chr3:53463664-53481757		1250.57	1669.48	-0.416807	13618	Non-regulated	No eCLIP peak	80394.7	1736	Non-regulated
Arhgap35	-1.33422	0.0476377	0.271923	chr7:16493720-16614993		1404.12	1873.17	-0.415813	112128	Non-regulated	eCLIP Peak	84711.5	1737	Non-regulated
Klhdc4	-1.33401	0.00218151	0.0429223	chr8:121796308-121829569		1377.26	1837.63	-0.416046	31179	Non-regulated	No eCLIP peak	80747.7	1738	Non-regulated
Dnmt1	-1.33369	0.0746868	0.354179	chr9:20907205-20959888		766.359	1022.5	-0.416009	47432	Non-regulated	eCLIP Peak	80473.5	1739	Non-regulated
Rufy2	-1.33356	0.0283511	0.201077	chr10:62980222-63018717		1434.15	1912.75	-0.415451	32457	Non-regulated	No eCLIP peak	86388.8	1740	Non-regulated
Rbm27	-1.33315	0.0496316	0.27876	chr18:42275353-42341549		2021.65	2694.9	-0.414698	60056	Non-regulated	No eCLIP peak	88320.5	1741	Non-regulated
Foxo4	-1.33304	0.179671	0.580755	chrX:101254528-101260873		88.976	118.176	-0.409451	3184	Non-regulated	No eCLIP peak	88068.4	1742	Non-regulated
Nectin1	-1.33287	0.0107431	0.111693	chr9:43743954-43807459		2560.33	3413.29	-0.414832	86529	Non-regulated	eCLIP Peak	88317.9	1743	Non-regulated
Rtf1	-1.33265	0.0100871	0.107168	chr2:119675068-119735406		5758.57	7674.21	-0.414306	55676	Non-regulated	No eCLIP peak	88302.8	1744	Non-regulated
Znrf3	-1.33246	0.387841	0.793776	chr11:5276329-5444847		31.7747	42.6913	-0.426063	162213	Non-regulated	No eCLIP peak	86721.9	1745	Non-regulated
Abcd4	-1.33226	0.0667712	0.331583	chr12:84601464-84617466		426.66	568.172	-0.413239	12257	Non-regulated	No eCLIP peak	93550.7	1746	Non-regulated
Il15	-1.33225	0.398352	0.793776	chr8:82331618-82403224		27.0735	36.2561	-0.421342	69678	Non-regulated	No eCLIP peak	71600.6	1747	Non-regulated
B230354K17Rik	-1.33215	0.0371082	0.234078	chr17:45433830-45442544		682.834	909.718	-0.413885	3796	Non-regulated	No eCLIP peak	89436.5	1748	Non-regulated
Mllt1	-1.3316	0.00202081	0.0409841	chr17:56892612-56935416		3433.26	4572.21	-0.413315	39169	Non-regulated	No eCLIP peak	89701.9	1749	Non-regulated
Gtf2i	-1.33156	0.00729724	0.0876648	chr5:134237832-134314760		13126.5	17478.3	-0.413087	72472	Non-regulated	No eCLIP peak	94585.8	1750	Non-regulated
Trp53bp2	-1.33146	0.0751019	0.355128	chr1:182409167-182462436		1840.6	2450.38	-0.412833	48900	Non-regulated	No eCLIP peak	91683.7	1751	Non-regulated
Fnbp1l	-1.33146	0.124346	0.474498	chr3:122538719-122619714		1032.91	1375.65	-0.413399	75793	Non-regulated	No eCLIP peak	89994.4	1752	Non-regulated
Tcf19	-1.33132	0.00906109	0.10011	chr17:35512735-35516824		631.253	840.395	-0.41285	2426	Non-regulated	No eCLIP peak	91522.1	1753	Non-regulated
Etnk2	-1.33127	0.424622	0.814401	chr1:133363572-133380318		24.284	32.5145	-0.421077	14468	Non-regulated	No eCLIP peak	72918.2	1754	Non-regulated
Snhg1	-1.33115	0.0424335	0.254816	chr19:8723485-8726442		252.102	336.176	-0.41521	2364	Non-regulated	eCLIP Peak	86207.4	1755	Non-regulated
Mpp7	-1.33101	0.0287916	0.202833	chr18:7347962-7626867		133.862	178.222	-0.412928	273927	Non-regulated	eCLIP Peak	94053.6	1756	Non-regulated
Ano8	-1.33084	0.00397347	0.0610413	chr8:71476017-71486067		884.445	1177.96	-0.413448	6292	Non-regulated	eCLIP Peak	89804.1	1757	Non-regulated
Ralbp1	-1.3308	0.0228167	0.176072	chr17:65848431-65885799		2253.8	2999.11	-0.412178	33234	Non-regulated	No eCLIP peak	90865	1758	Non-regulated
Btbd7	-1.33079	0.0353538	0.228266	chr12:102780797-102878472		188.218	250.565	-0.412784	89453	Non-regulated	No eCLIP peak	91667.4	1759	Non-regulated
Tbl1x	-1.33058	0.029302	0.204588	chrX:77511012-77661177		1567.03	2084.6	-0.41174	146737	Non-regulated	eCLIP Peak	87924.4	1760	Non-regulated
Pbx1	-1.33052	0.000837083	0.0245249	chr1:168119365-168432169		10203.5	13575.4	-0.411922	308937	Non-regulated	eCLIP Peak	91544.2	1761	Non-regulated
Trak2	-1.33051	0.0290316	0.203594	chr1:58900450-58973482		3087.59	4107.75	-0.411866	66793	Non-regulated	No eCLIP peak	88510.7	1762	Non-regulated
Ric1	-1.33024	0.000808775	0.0239401	chr19:29522282-29605921		1048.91	1395	-0.411371	77358	Non-regulated	No eCLIP peak	88147.1	1763	Non-regulated
Psip1	-1.33016	0.0163039	0.143661	chr4:83454462-83486465		2464.17	3277.54	-0.411508	27529	Non-regulated	No eCLIP peak	86605.9	1764	Non-regulated
Satb1	-1.32956	0.00773927	0.0908286	chr17:51736188-51833290		827.246	1099.56	-0.410533	90243	Non-regulated	No eCLIP peak	88756.1	1765	Non-regulated
Pcnx3	-1.32926	0.0141878	0.132043	chr19:5664635-5688908		1026.22	1364.89	-0.411445	17010	Non-regulated	eCLIP Peak	87477.3	1766	Non-regulated
Shtn1	-1.3289	0.0386176	0.240059	chr19:58973358-59076100		1717.09	2281.71	-0.410148	98945	Non-regulated	No eCLIP peak	88828.1	1767	Non-regulated
Rflna	-1.32885	0.128109	0.48323	chr5:125003444-125012547		74.7562	99.717	-0.415647	7646	Non-regulated	No eCLIP peak	84196.2	1768	Non-regulated
Vps54	-1.32882	0.0631167	0.32	chr11:21239032-21321136		273.786	363.442	-0.408678	77533	Non-regulated	eCLIP Peak	83731.2	1769	Non-regulated
Gm5820	-1.32845	0.173766	0.570953	chr18:38892456-38971274		104.349	138.24	-0.405756	76632	Non-regulated	eCLIP Peak	91212.3	1770	Non-regulated
Scd1	-1.32838	0.0833957	0.376893	chr19:44392341-44407709		209.34	277.39	-0.406067	8423	Non-regulated	No eCLIP peak	90287.4	1771	Non-regulated
Usp2	-1.32832	0.0210704	0.167488	chr9:44067021-44095625		1061.38	1410.66	-0.410422	24740	Non-regulated	No eCLIP peak	88808.5	1772	Non-regulated
Tulp4	-1.32826	0.00364685	0.058015	chr17:6106435-6251128		10458	13890.8	-0.409525	124954	Non-regulated	No eCLIP peak	88919	1773	Non-regulated
Akap8	-1.32818	0.00728456	0.0875646	chr17:32303673-32321238		1196.67	1589.65	-0.409687	13384	Non-regulated	No eCLIP peak	88570.6	1774	Non-regulated
Pou3f3	-1.32817	0.00199818	0.0407829	chr1:42695768-42700210		4450.53	5911.24	-0.409482	922	Non-regulated	No eCLIP peak	87442.5	1775	Non-regulated
Zfp710	-1.3281	0.0859777	0.383584	chr7:80024813-80092751		293.021	389.665	-0.411229	63489	Non-regulated	eCLIP Peak	87634.5	1776	Non-regulated
Atg2b	-1.3281	0.0394923	0.243339	chr12:105613539-105685243		2599.13	3452.19	-0.409483	61530	Non-regulated	No eCLIP peak	87693.5	1777	Non-regulated
Prkce	-1.32806	0.00348064	0.056496	chr17:86167783-86657919		10278.2	13650.3	-0.409344	483881	Non-regulated	eCLIP Peak	88161	1778	Non-regulated
Lrrc4b	-1.32739	0.00886023	0.0989121	chr7:44442487-44463315		11809.6	15676.9	-0.408674	31554	Non-regulated	No eCLIP peak	83767.4	1779	Non-regulated
Ptpn21	-1.3271	0.157541	0.54363	chr12:98676741-98737405		257.905	341.838	-0.406472	55103	Non-regulated	No eCLIP peak	90474.7	1780	Non-regulated
Ankrd33b	-1.32685	0.448506	0.833944	chr15:31290864-31367759		1030.66	1367.61	-0.40809	68783	Non-regulated	eCLIP Peak	83936.5	1781	Non-regulated
Rasal1	-1.32617	0.0626371	0.318424	chr5:120648812-120679597		1503.12	1993.96	-0.407676	27564	Non-regulated	No eCLIP peak	84831.8	1782	Non-regulated
Zfp316	-1.32616	0.00269688	0.0488504	chr5:143249695-143270022		1321.62	1753.45	-0.407889	13435	Non-regulated	No eCLIP peak	83674.8	1783	Non-regulated
Kcnab3	-1.32606	0.0515567	0.283863	chr11:69326257-69333041		5451.11	7228.72	-0.407191	4247	Non-regulated	No eCLIP peak	85468.6	1784	Non-regulated
Kbtbd11	-1.32606	0.178461	0.578861	chr8:15011024-15033330		849.883	1127.29	-0.407525	15336	Non-regulated	No eCLIP peak	85478	1785	Non-regulated
Dip2a	-1.32599	0.0644858	0.324476	chr10:76262738-76345293		822.057	1090.04	-0.407066	76005	Non-regulated	No eCLIP peak	88617.3	1786	Non-regulated
Tmem182	-1.32592	0.247203	0.679379	chr1:40805601-40856886		48.3425	63.4673	-0.392721	48571	Non-regulated	No eCLIP peak	68274.2	1787	Non-regulated
Prph	-1.32579	0.244149	0.675488	chr15:99055173-99058978		38.5572	51.2586	-0.410795	1943	Non-regulated	No eCLIP peak	87758.7	1788	Non-regulated
Col20a1	-1.32574	0.00733394	0.0878903	chr2:180984232-181017540		791.71	1049.07	-0.406062	26817	Non-regulated	eCLIP Peak	90350.3	1789	Non-regulated
Gpc4	-1.32564	0.479532	0.845039	chrX:52052922-52165252		80.5125	106.601	-0.404931	109581	Non-regulated	No eCLIP peak	92364.9	1790	Non-regulated
Lig3	-1.32554	0.0840111	0.378266	chr11:82781109-82807414		609.268	807.699	-0.406742	17183	Non-regulated	No eCLIP peak	88884.4	1791	Non-regulated
Gm6712	-1.32541	0.0984936	0.417219	chr17:17294443-17319585		95.7847	127.539	-0.413077	23136	Non-regulated	No eCLIP peak	94072.4	1792	Non-regulated
Zfp28	-1.32518	0.243991	0.675488	chr7:6383318-6396915		75.7076	100.083	-0.402679	9174	Non-regulated	No eCLIP peak	84863.3	1793	Non-regulated
Doc2g	-1.32512	0.0189486	0.157465	chr19:4003320-4007005		112105	148554	-0.406134	2224	Non-regulated	No eCLIP peak	90001	1794	Non-regulated
Endov	-1.32512	0.0512521	0.283388	chr11:119491346-119511465		410.133	543.73	-0.406797	15007	Non-regulated	No eCLIP peak	88845.8	1795	Non-regulated
Gprin1	-1.32481	0.00706103	0.0857928	chr13:54736673-54749874		9575.61	12686.5	-0.405861	8956	Non-regulated	No eCLIP peak	90137.7	1796	Non-regulated
Krt9	-1.32468	0.011681	0.117878	chr11:100186781-100193246		498.257	660.559	-0.406797	3886	Non-regulated	No eCLIP peak	88544.7	1797	Non-regulated
Ubn1	-1.32461	0.00190318	0.0395828	chr16:5050056-5086289		1021.27	1352.82	-0.405604	29877	Non-regulated	eCLIP Peak	90683.6	1798	Non-regulated
Wls	-1.32413	0.0118052	0.118556	chr3:159839650-159938666		701.597	929.346	-0.405574	96878	Non-regulated	No eCLIP peak	90693.6	1799	Non-regulated
Brd2	-1.32411	0.0510998	0.282977	chr17:34112020-34122607		5539.3	7334.26	-0.404948	5921	Non-regulated	No eCLIP peak	91815.9	1800	Non-regulated
Sema6d	-1.32401	0.132455	0.493388	chr2:124089966-124667789		865.779	1146.02	-0.404566	571644	Non-regulated	eCLIP Peak	92303.8	1801	Non-regulated
Gtf2ird2	-1.32401	0.154283	0.537157	chr5:134184019-134224355		177.694	235.699	-0.407552	36960	Non-regulated	No eCLIP peak	84673.8	1802	Non-regulated
Fam13a	-1.32396	0.0829708	0.375888	chr6:58932090-59024502		205.159	271.699	-0.405265	86674	Non-regulated	No eCLIP peak	90171.9	1803	Non-regulated
Mical1	-1.3238	0.122551	0.470795	chr10:41476312-41487030		123.974	163.415	-0.398505	7154	Non-regulated	No eCLIP peak	76424.6	1804	Non-regulated
Gm7072	-1.32341	0.0758843	0.356742	chr17:22285871-22314842		349.435	462.287	-0.403767	25493	Non-regulated	No eCLIP peak	86929.2	1805	Non-regulated
Phrf1	-1.32291	0.0596115	0.309372	chr7:141228788-141262751		441.921	584.24	-0.402774	28688	Non-regulated	eCLIP Peak	85044.7	1806	Non-regulated
Gm20482	-1.32288	0.439458	0.827663	chr7:8854746-8863010		110.957	146.713	-0.402996	5361	Non-regulated	No eCLIP peak	85060.5	1807	Non-regulated
Rapgef4	-1.32287	0.00534151	0.0721206	chr2:71981215-72257474		7124.23	9424.01	-0.403606	272054	Non-regulated	eCLIP Peak	86685.4	1808	Non-regulated
Ptbp1	-1.32279	0.0264508	0.192844	chr10:79854432-79864434		531.919	703.582	-0.403511	6974	Non-regulated	No eCLIP peak	84100.6	1809	Non-regulated
Prkdc	-1.32272	0.103406	0.429041	chr16:15637864-15842239		97.3414	128.659	-0.402433	191700	Non-regulated	eCLIP Peak	89007.4	1810	Non-regulated
Gm9899	-1.3227	0.117688	0.460734	chr5:30573987-30588622		306.821	405.56	-0.40252	9810	Non-regulated	No eCLIP peak	86639.6	1811	Non-regulated
Slc12a4	-1.32259	0.0679074	0.334335	chr8:105943590-105966115		140.518	186.343	-0.407202	18694	Non-regulated	No eCLIP peak	85371.9	1812	Non-regulated
Epb41	-1.32251	0.0360309	0.230145	chr4:131923429-132075313		5963.06	7885.92	-0.403227	146835	Non-regulated	No eCLIP peak	85579.7	1813	Non-regulated
Cnot3	-1.32244	0.0125742	0.123067	chr7:3645249-3661108		2396.85	3169.9	-0.403297	12856	Non-regulated	eCLIP Peak	84848.1	1814	Non-regulated
Pan2	-1.32147	0.168001	0.561558	chr10:128303334-128321358		117.168	154.056	-0.394874	13574	Non-regulated	No eCLIP peak	68701.3	1815	Non-regulated
Kif3b	-1.32136	0.0504465	0.280987	chr2:153291416-153333387		3276.82	4329.79	-0.402	36343	Non-regulated	No eCLIP peak	87652	1816	Non-regulated
Pnn	-1.32111	0.111026	0.445941	chr12:59066919-59074017		399.999	527.87	-0.400187	3630	Non-regulated	No eCLIP peak	94018.2	1817	Non-regulated
Eno1b	-1.32093	0.153037	0.53435	chr18:48045335-48048380		32568.9	43021.1	-0.401552	1287	Non-regulated	No eCLIP peak	88327.1	1818	Non-regulated
Plekha5	-1.32085	0.027474	0.197245	chr6:140424099-140597107		1758.23	2322.14	-0.401332	165675	Non-regulated	eCLIP Peak	92625.3	1819	Non-regulated
6430548M08Rik	-1.32066	0.0431353	0.256761	chr8:120114150-120165307		25545.3	33736.8	-0.401266	45591	Non-regulated	No eCLIP peak	92136.3	1820	Non-regulated
Zfp169	-1.32064	0.0338565	0.222494	chr13:48487647-48513437		425.228	561.253	-0.400415	23628	Non-regulated	No eCLIP peak	92412.8	1821	Non-regulated
Slc27a3	-1.32011	0.202281	0.617171	chr3:90385233-90389938		75.0041	99.3106	-0.40498	2213	Non-regulated	eCLIP Peak	90894.3	1822	Non-regulated
Tulp3	-1.31987	0.0290154	0.203546	chr6:128321166-128355851		524.043	691.929	-0.40094	31317	Non-regulated	No eCLIP peak	92455.7	1823	Non-regulated
Kidins220	-1.31976	0.0394552	0.243269	chr12:24974928-25063145		12602.6	16632.2	-0.400261	77364	Non-regulated	No eCLIP peak	94305.3	1824	Non-regulated
Snph	-1.31952	7.11515e-05	0.00538397	chr2:151590549-151632593		28362.5	37425.2	-0.400029	37295	Non-regulated	eCLIP Peak	94422.2	1825	Non-regulated
Aldh4a1	-1.31948	0.105123	0.432809	chr4:139622894-139649691		326.327	431.325	-0.402454	23443	Non-regulated	No eCLIP peak	86752.6	1826	Non-regulated
Spag9	-1.31937	0.077911	0.361918	chr11:93996089-94126093		7509.79	9907.9	-0.399808	122643	Non-regulated	No eCLIP peak	95010.6	1827	Non-regulated
Nrp1	-1.31922	0.0933496	0.403556	chr8:128358603-128505476		3698.91	4879.49	-0.399628	140483	Non-regulated	eCLIP Peak	94540.3	1828	Non-regulated
Sos1	-1.31907	0.0571159	0.300874	chr17:80393752-80480453		1822.07	2402.95	-0.399228	77783	Non-regulated	eCLIP Peak	78635	1829	Non-regulated
Ppp2r2c	-1.31897	0.0120808	0.120289	chr5:36868510-36955078		8321.62	10975.8	-0.399392	82478	Non-regulated	eCLIP Peak	87360.1	1830	Non-regulated
Rora	-1.31894	0.0943899	0.405718	chr9:68653786-69388246		688.744	908.498	-0.399515	723583	Non-regulated	eCLIP Peak	94276.7	1831	Non-regulated
Rfx1	-1.31887	0.0481399	0.273645	chr8:84066833-84097002		381.207	502.752	-0.399273	25985	Non-regulated	eCLIP Peak	78550.9	1832	Non-regulated
Ntm	-1.31877	0.0303578	0.208604	chr9:28994749-29963465		4183.75	5517.91	-0.399326	965358	Non-regulated	eCLIP Peak	87277.3	1833	Non-regulated
Hmgxb4	-1.31872	0.0561108	0.29852	chr8:74993650-75031977		249.876	329.617	-0.399582	34426	Non-regulated	No eCLIP peak	93197.5	1834	Non-regulated
Chml	-1.31862	0.0364234	0.231714	chr1:175682237-175688353		854.04	1125.65	-0.398378	3489	Non-regulated	No eCLIP peak	76535.2	1835	Non-regulated
Zfp362	-1.31849	0.0164753	0.144669	chr4:128773085-128806112		954.614	1258.69	-0.398936	30146	Non-regulated	eCLIP Peak	78825	1836	Non-regulated
Acap2	-1.31848	0.016429	0.144441	chr16:31092413-31201239		2675.67	3527.32	-0.398672	102319	Non-regulated	eCLIP Peak	77326.7	1837	Non-regulated
Synpo	-1.31844	0.110952	0.44587	chr18:60593973-60660144		2031.69	2678.82	-0.398922	52334	Non-regulated	eCLIP Peak	80970.4	1838	Non-regulated
Abca5	-1.31818	0.0633056	0.32053	chr11:110269370-110337717		1263.49	1665.07	-0.398164	60079	Non-regulated	No eCLIP peak	72513.9	1839	Non-regulated
Ntrk2	-1.31794	0.0475408	0.271708	chr13:58806568-59133970		2623.49	3457.5	-0.398244	317530	Non-regulated	eCLIP Peak	76552.3	1840	Non-regulated
Usp29	-1.31767	0.0651412	0.326783	chr7:6730583-6967219		2498.23	3291.56	-0.397867	229097	Non-regulated	No eCLIP peak	71971.2	1841	Non-regulated
Tbc1d4	-1.31759	0.0752231	0.355487	chr14:101442360-101609193		1114	1468.1	-0.398206	160191	Non-regulated	eCLIP Peak	73987.9	1842	Non-regulated
Fcho1	-1.31713	0.0127244	0.123921	chr8:71708387-71725681		2180.12	2872.14	-0.397718	14135	Non-regulated	eCLIP Peak	69818	1843	Non-regulated
Cdh2	-1.31708	0.0398024	0.244431	chr18:16588877-16809247		3627.41	4777.71	-0.397379	215527	Non-regulated	eCLIP Peak	69798.6	1844	Non-regulated
Rint1	-1.3169	0.0315719	0.213232	chr5:23787711-23820368		241.811	318.873	-0.399101	29361	Non-regulated	No eCLIP peak	79020.5	1845	Non-regulated
Cep120	-1.31682	0.0594907	0.308988	chr18:53681724-53745609		1740.14	2291.01	-0.39678	58271	Non-regulated	No eCLIP peak	68052.6	1846	Non-regulated
Thrb	-1.31626	0.466178	0.845039	chr14:17826893-18038088		59.4871	78.4301	-0.39883	371132	Non-regulated	eCLIP Peak	80717.3	1847	Non-regulated
Tle3	-1.31595	0.0183792	0.154361	chr9:61372366-61418497		1830.78	2409.76	-0.396432	40927	Non-regulated	eCLIP Peak	66698.3	1848	Non-regulated
Sema6a	-1.31591	0.0983443	0.416811	chr18:47245254-47368871		2108.58	2774.88	-0.396154	116799	Non-regulated	eCLIP Peak	62631.1	1849	Non-regulated
Mras	-1.31577	0.00772977	0.0908286	chr9:99385421-99436927		1206.71	1587.37	-0.395552	47261	Non-regulated	eCLIP Peak	63497.4	1850	Non-regulated
Zc3h6	-1.31565	0.0112035	0.114853	chr2:128967401-129018563		1384.95	1822.89	-0.396391	46246	Non-regulated	No eCLIP peak	66950.8	1851	Non-regulated
Med12	-1.31564	0.245766	0.677344	chrX:101274091-101298927		117.093	154.521	-0.400145	16496	Non-regulated	No eCLIP peak	94164.1	1852	Non-regulated
Mau2	-1.31559	0.0211324	0.167568	chr8:70014527-70042739		1680.89	2211.5	-0.395801	21243	Non-regulated	No eCLIP peak	63137.5	1853	Non-regulated
Ephb1	-1.31549	0.242968	0.674048	chr9:101922130-102354695		104.7	137.803	-0.396353	427899	Non-regulated	eCLIP Peak	66713.5	1854	Non-regulated
Zfp652	-1.31546	0.0569993	0.30059	chr11:95749067-95768186		567.43	746.071	-0.394871	115537	Non-regulated	No eCLIP peak	69450.6	1855	Non-regulated
Grb10	-1.31529	0.114886	0.453964	chr11:11930499-12037953		287.672	378.394	-0.395464	101833	Non-regulated	No eCLIP peak	67368	1856	Non-regulated
Rps6ka4	-1.31519	0.0136761	0.129439	chr19:6829085-6840634		2487.95	3272.72	-0.395533	8412	Non-regulated	No eCLIP peak	67120.6	1857	Non-regulated
Scamp2	-1.31517	0.00975167	0.105019	chr9:57560943-57588798		299.664	394.429	-0.39642	25513	Non-regulated	No eCLIP peak	66633.6	1858	Non-regulated
Rpap1	-1.31514	0.0213601	0.168767	chr2:119763959-119787537		773.158	1017.1	-0.395622	18743	Non-regulated	No eCLIP peak	63658	1859	Non-regulated
Nr2f1	-1.31468	0.680317	0.905642	chr13:78188977-78198873		316.206	415.763	-0.394897	7578	Non-regulated	No eCLIP peak	67761.3	1860	Non-regulated
Rnf112	-1.31467	0.0437934	0.259163	chr11:61448417-61454005		1918.66	2522.92	-0.39499	2547	Non-regulated	No eCLIP peak	66966.7	1861	Non-regulated
Fbxl18	-1.31453	0.0272627	0.196448	chr5:142871789-142895422		482.457	634.865	-0.396048	20619	Non-regulated	No eCLIP peak	61826.8	1862	Non-regulated
Sema3f	-1.31449	0.0121234	0.120447	chr9:107681499-107710476		3365.03	4422.75	-0.394322	25581	Non-regulated	No eCLIP peak	68370.4	1863	Non-regulated
Cblb	-1.3141	0.0671755	0.332339	chr16:52031549-52208047		304.296	400.546	-0.396494	170176	Non-regulated	No eCLIP peak	68198.6	1864	Non-regulated
Sap130	-1.31402	0.025563	0.188197	chr18:31634368-31723062		723.703	951.422	-0.394687	84661	Non-regulated	eCLIP Peak	68769.7	1865	Non-regulated
Bicral	-1.31393	0.0855482	0.382349	chr17:46798116-46832316		336.326	441.642	-0.393016	26719	Non-regulated	eCLIP Peak	68687.6	1866	Non-regulated
Heatr5b	-1.31382	0.10228	0.426053	chr17:78751990-78835381		915.568	1202.83	-0.393696	76039	Non-regulated	No eCLIP peak	68469.9	1867	Non-regulated
Cldn11	-1.31364	0.106516	0.435785	chr3:31149920-31164326		137.076	179.912	-0.392315	12535	Non-regulated	No eCLIP peak	68710	1868	Non-regulated
5930430L01Rik	-1.31328	0.203208	0.618572	chr5:148990056-148995218		163.955	215.243	-0.392661	1174	Non-regulated	No eCLIP peak	68322.4	1869	Non-regulated
Gtf2ird1	-1.31317	0.0427873	0.256128	chr5:134357661-134456716		997.072	1309.46	-0.393204	95537	Non-regulated	eCLIP Peak	69313.1	1870	Non-regulated
Ptgfrn	-1.31283	0.0720127	0.345928	chr3:101040236-101110178		1470.27	1929.97	-0.392501	64145	Non-regulated	No eCLIP peak	69237.3	1871	Non-regulated
Tbc1d9b	-1.31278	0.0240534	0.181295	chr11:50131360-50172783		15125.1	19856.3	-0.392651	36177	Non-regulated	No eCLIP peak	69548.3	1872	Non-regulated
Psmb8	-1.31268	0.563963	0.877035	chr17:34198195-34201454		23.2385	30.6407	-0.398933	2037	Non-regulated	No eCLIP peak	80229.9	1873	Non-regulated
Cdk8	-1.3126	0.0206917	0.165838	chr5:146231249-146302874		267.984	351.143	-0.389915	68672	Non-regulated	eCLIP Peak	69613.2	1874	Non-regulated
Sh3pxd2b	-1.31244	0.169576	0.564191	chr11:32347818-32428189		244.709	321.274	-0.392739	72941	Non-regulated	eCLIP Peak	68978.1	1875	Non-regulated
Arhgef6	-1.31191	0.103568	0.429433	chrX:57231487-57338729		227.354	298.672	-0.393626	102676	Non-regulated	eCLIP Peak	68139.6	1876	Non-regulated
Septin11	-1.31146	0.0159194	0.141858	chr5:93093416-93182339		4510.92	5916.08	-0.391219	81195	Non-regulated	eCLIP Peak	71407.3	1877	Non-regulated
Marf1	-1.31144	0.0054065	0.0728112	chr16:14109166-14163352		3619.61	4746.53	-0.391039	42344	Non-regulated	No eCLIP peak	71902.7	1878	Non-regulated
Bmp2k	-1.31141	0.150942	0.530087	chr5:96997689-97091047		104.123	137.104	-0.396987	86792	Non-regulated	No eCLIP peak	67798.6	1879	Non-regulated
Basp1	-1.31134	0.00313758	0.0532561	chr15:25363277-25413764		18869.9	24745.2	-0.391061	48633	Non-regulated	No eCLIP peak	71763.2	1880	Non-regulated
Mns1	-1.31118	0.259212	0.691795	chr9:72438529-72458752		73.6549	96.9023	-0.39575	18241	Non-regulated	No eCLIP peak	63185.8	1881	Non-regulated
Kansl1	-1.31114	0.00663571	0.0832869	chr11:104333539-104469443		3360.62	4406.09	-0.390771	130300	Non-regulated	eCLIP Peak	72020.7	1882	Non-regulated
Dbn1	-1.311	0.000875788	0.0250635	chr13:55473428-55488168		10472.3	13729.7	-0.390719	11605	Non-regulated	eCLIP Peak	71680.9	1883	Non-regulated
Rabgap1	-1.31067	0.0606485	0.312594	chr2:37443285-37566450		3046.35	3992.57	-0.390236	118186	Non-regulated	No eCLIP peak	71794.9	1884	Non-regulated
Ppp1r37	-1.31038	0.00410254	0.0621505	chr7:19530801-19562400		7941.27	10406.8	-0.390082	28461	Non-regulated	No eCLIP peak	71699	1885	Non-regulated
Astn1	-1.31036	0.0208783	0.166741	chr1:158362304-158691786		6381.07	8362.07	-0.390061	322259	Non-regulated	eCLIP Peak	71883.9	1886	Non-regulated
Thrap3	-1.30988	0.0371391	0.23419	chr4:126164085-126202710		1973.52	2585.82	-0.389854	34301	Non-regulated	No eCLIP peak	71972.3	1887	Non-regulated
Zeb1	-1.30979	0.131934	0.492264	chr18:5591860-5775743		287.958	377.201	-0.389475	177803	Non-regulated	eCLIP Peak	76307.2	1888	Non-regulated
Maml1	-1.30971	0.0185788	0.155376	chr11:50255634-50292336		593.493	777.279	-0.389201	31150	Non-regulated	No eCLIP peak	75545	1889	Non-regulated
Pak4	-1.30947	0.0293984	0.204588	chr7:28558818-28598184		222.012	291.39	-0.392311	36468	Non-regulated	No eCLIP peak	71091.8	1890	Non-regulated
Taf1a	-1.30939	0.180512	0.582518	chr1:183388885-183410199		154.311	202.171	-0.389731	18901	Non-regulated	No eCLIP peak	73770.5	1891	Non-regulated
Zfp433	-1.30936	0.153582	0.535393	chr10:81704825-81721976		171.749	224.907	-0.389027	14768	Non-regulated	No eCLIP peak	76526.9	1892	Non-regulated
Zfp592	-1.30918	0.0313147	0.212313	chr7:81009428-81045163		1174.62	1537.17	-0.388077	44187	Non-regulated	No eCLIP peak	85721.7	1893	Non-regulated
Bcr	-1.30902	0.0209629	0.16718	chr10:75060896-75184923		1165.41	1525.51	-0.388461	117491	Non-regulated	eCLIP Peak	77944.1	1894	Non-regulated
Hp1bp3	-1.30881	0.0130289	0.125454	chr4:138216612-138244680		5789.26	7576.93	-0.388233	23233	Non-regulated	No eCLIP peak	77258.7	1895	Non-regulated
Nmnat2	-1.30878	0.0496294	0.27876	chr1:152954990-153119265		2277.25	2980.05	-0.388043	159638	Non-regulated	eCLIP Peak	85337.3	1896	Non-regulated
Gm13205	-1.3087	0.175582	0.573728	chr4:148947489-148952322		128.01	167.357	-0.38667	861	Non-regulated	No eCLIP peak	91812.1	1897	Non-regulated
1700017B05Rik	-1.30844	0.113016	0.450131	chr9:57251143-57262602		659.134	863.124	-0.388996	5344	Non-regulated	No eCLIP peak	77626.8	1898	Non-regulated
Lin54	-1.30828	0.03181	0.214198	chr5:100442033-100500641		327.999	428.475	-0.385519	54806	Non-regulated	No eCLIP peak	97078.6	1899	Non-regulated
Pfkfb3	-1.30827	0.0805598	0.369206	chr2:11471433-11554077		295.777	386.197	-0.384827	77844	Non-regulated	No eCLIP peak	91307.8	1900	Non-regulated
Rgs3	-1.30808	0.021036	0.1674	chr4:62559847-62704001		4413.13	5772.42	-0.387373	95296	Non-regulated	No eCLIP peak	83827.7	1901	Non-regulated
Gpr153	-1.30786	0.0270918	0.195574	chr4:152274112-152285338		296.023	387.764	-0.389472	7268	Non-regulated	No eCLIP peak	75245.9	1902	Non-regulated
Ift81	-1.30775	0.0289767	0.203411	chr5:122550204-122614544		501.588	656.054	-0.387312	61365	Non-regulated	No eCLIP peak	83901.1	1903	Non-regulated
Sdc3	-1.30763	0.000557016	0.0189358	chr4:130792537-130826322		37843	49485.6	-0.38698	28810	Non-regulated	No eCLIP peak	83134.2	1904	Non-regulated
Neto1	-1.30758	0.664984	0.905642	chr18:86394951-86505455		507.152	663.183	-0.386989	103415	Non-regulated	No eCLIP peak	83910.3	1905	Non-regulated
Klhl40	-1.30758	0.105295	0.433178	chr9:121777607-121783819		250.272	327.03	-0.385928	3758	Non-regulated	No eCLIP peak	97309.7	1906	Non-regulated
Rab3il1	-1.30744	0.0429489	0.256377	chr19:10001668-10038380		247.58	324.021	-0.388192	30892	Non-regulated	No eCLIP peak	77406.4	1907	Non-regulated
Gm10575	-1.30718	0.121199	0.467555	chr7:141461481-141467771		203.445	266.609	-0.390087	4618	Non-regulated	No eCLIP peak	71338.2	1908	Non-regulated
Fgf1	-1.30711	0.504264	0.845039	chr18:38838673-38929405		1298.83	1697.56	-0.386255	86747	Non-regulated	No eCLIP peak	94366.5	1909	Non-regulated
4933412E12Rik	-1.30688	0.280844	0.710847	chr10:116950562-116963279		107.507	140.547	-0.386627	10994	Non-regulated	No eCLIP peak	92214.9	1910	Non-regulated
Micall1	-1.30636	0.173974	0.571211	chr15:79108972-79136898		354.964	463.725	-0.385595	21225	Non-regulated	No eCLIP peak	98099.1	1911	Non-regulated
Osbpl10	-1.30634	0.0315796	0.213238	chr9:114978485-115233758		972.789	1270.83	-0.385575	251178	Non-regulated	eCLIP Peak	98379.2	1912	Non-regulated
Samd4	-1.306	0.106047	0.434853	chr14:46882965-47105817		714.828	933.17	-0.384544	214767	Non-regulated	eCLIP Peak	95263.2	1913	Non-regulated
Cpne8	-1.30597	0.608582	0.905642	chr15:90487481-90679391		139.884	182.767	-0.385768	188584	Non-regulated	No eCLIP peak	99820.8	1914	Non-regulated
Slmap	-1.30589	0.0348313	0.226021	chr14:26413169-26534931		2688.53	3510.46	-0.384844	116288	Non-regulated	eCLIP Peak	92172	1915	Non-regulated
Fnip2	-1.30575	0.0558159	0.298006	chr3:79455971-79567679		489.126	638.837	-0.38524	104524	Non-regulated	No eCLIP peak	96872.4	1916	Non-regulated
Rgl2	-1.30564	0.00903517	0.0998584	chr17:33929894-33937685		693.55	904.956	-0.383847	4854	Non-regulated	No eCLIP peak	95784.8	1917	Non-regulated
Atp8a2	-1.3056	0.0539114	0.291888	chr14:59647531-60197180		1487.97	1942.89	-0.384862	435409	Non-regulated	eCLIP Peak	96307	1918	Non-regulated
Ssh1	-1.30554	0.1141	0.452413	chr5:113937094-113993806		1341.5	1751.18	-0.384486	48365	Non-regulated	eCLIP Peak	94054.7	1919	Non-regulated
Prdm10	-1.30554	0.129935	0.487713	chr9:31280549-31381731		187.915	245.573	-0.386069	94403	Non-regulated	No eCLIP peak	93516.3	1920	Non-regulated
Mon2	-1.3052	0.0137628	0.129788	chr10:122992061-123076505		1085.36	1416.24	-0.383888	75145	Non-regulated	No eCLIP peak	95288.3	1921	Non-regulated
Ctcf	-1.30507	0.00502947	0.0694796	chr8:105636538-105682922		2192.5	2861.16	-0.384022	42562	Non-regulated	No eCLIP peak	95171	1922	Non-regulated
Sec16a	-1.30499	0.0600235	0.310692	chr2:26409433-26445217		1007.24	1315.08	-0.384748	26987	Non-regulated	No eCLIP peak	94986.1	1923	Non-regulated
Nup210	-1.30463	0.0267258	0.193845	chr6:91013067-91116828		1792.97	2339.59	-0.3839	96725	Non-regulated	No eCLIP peak	95801.6	1924	Non-regulated
Nbr1	-1.30452	0.0347073	0.225758	chr11:101552107-101581953		6396.38	8344.12	-0.383504	25014	Non-regulated	No eCLIP peak	95278.8	1925	Non-regulated
Pcdh17	-1.30437	0.035562	0.228678	chr14:84443562-84539002		2350.72	3066.06	-0.383284	83989	Non-regulated	No eCLIP peak	95787.2	1926	Non-regulated
Evc2	-1.30417	0.246604	0.678526	chr5:37338478-37425054		90.6246	118.447	-0.386263	82466	Non-regulated	No eCLIP peak	93817.2	1927	Non-regulated
Sfxn5	-1.30416	0.121034	0.467483	chr6:85213051-85333438		618.01	805.686	-0.382589	116718	Non-regulated	eCLIP Peak	96638.9	1928	Non-regulated
Rassf4	-1.30414	0.061963	0.316377	chr6:116633008-116673836		3874.53	5052.88	-0.383084	34485	Non-regulated	No eCLIP peak	96724.4	1929	Non-regulated
Ankfy1	-1.3037	0.164057	0.556017	chr11:72689991-72772146		247.696	323.091	-0.38337	74111	Non-regulated	No eCLIP peak	95940.5	1930	Non-regulated
Safb2	-1.30368	0.0926808	0.401379	chr17:56560973-56584585		462.705	603.903	-0.384225	18370	Non-regulated	No eCLIP peak	94934.4	1931	Non-regulated
Trak1	-1.30324	0.00029879	0.0127578	chr9:121297499-121474919		6051.3	7886.24	-0.382093	172042	Non-regulated	eCLIP Peak	95865.4	1932	Non-regulated
Hectd1	-1.30291	0.0432079	0.257096	chr12:51743719-51829537		5358.88	6982.15	-0.381742	76827	Non-regulated	No eCLIP peak	95656.7	1933	Non-regulated
Atp8b2	-1.30273	0.106155	0.435144	chr3:89939488-89963338		1462.84	1905.06	-0.381068	18323	Non-regulated	eCLIP Peak	97377.6	1934	Non-regulated
Opa3	-1.30239	0.014926	0.136142	chr7:19228339-19247865		7078.78	9219.15	-0.381135	26771	Non-regulated	eCLIP Peak	95124.1	1935	Non-regulated
Gabrd	-1.30214	0.604053	0.905006	chr4:155384979-155398069		271.853	354.036	-0.381068	11212	Non-regulated	eCLIP Peak	97193.3	1936	Non-regulated
Gm14410	-1.30185	0.100661	0.422768	chr2:177124003-177206496		1155	1503.3	-0.38024	11624	Non-regulated	No eCLIP peak	108365	1937	Non-regulated
Sh3bp1	-1.30182	0.187308	0.593754	chr15:78899768-78912052		87.4885	114.321	-0.385923	10367	Non-regulated	No eCLIP peak	99435.1	1938	Non-regulated
Gtf2a1	-1.30164	0.0151273	0.137477	chr12:91555262-91590488		702.731	915.203	-0.38112	28684	Non-regulated	No eCLIP peak	97344.7	1939	Non-regulated
Zfp729a	-1.30155	0.0499141	0.2795	chr13:67617001-67637793		447.248	581.791	-0.379426	15574	Non-regulated	No eCLIP peak	110296	1940	Non-regulated
Tns2	-1.3015	0.0906619	0.395826	chr15:102100412-102116401		257.982	335.878	-0.380665	11316	Non-regulated	eCLIP Peak	104142	1941	Non-regulated
Pdrg1	-1.30144	0.0469001	0.269504	chr2:153008890-153015429		2856.37	3717.95	-0.380323	5265	Non-regulated	No eCLIP peak	107431	1942	Non-regulated
Szt2	-1.30143	0.13952	0.508129	chr4:118362740-118409263		243.74	316.944	-0.378883	35566	Non-regulated	eCLIP Peak	110306	1943	Non-regulated
Mob3c	-1.30139	0.139381	0.507915	chr4:115828080-115836185		83.4847	108.718	-0.381013	5210	Non-regulated	No eCLIP peak	103748	1944	Non-regulated
AU040320	-1.30137	0.0465402	0.268126	chr4:126752199-126870070		3442.51	4479.84	-0.379985	112443	Non-regulated	No eCLIP peak	110109	1945	Non-regulated
Top1	-1.30136	0.0146094	0.134398	chr2:160645887-160722761		4238.89	5515.9	-0.37991	73021	Non-regulated	No eCLIP peak	109776	1946	Non-regulated
Gprc5b	-1.30125	0.0797813	0.36709	chr7:118972040-118995211		1988.26	2587.06	-0.379809	18647	Non-regulated	No eCLIP peak	109313	1947	Non-regulated
Lamc2	-1.30112	0.044988	0.263319	chr1:153122756-153186448		293.253	381.885	-0.380991	58528	Non-regulated	No eCLIP peak	103765	1948	Non-regulated
Tmem44	-1.3009	0.229317	0.658824	chr16:30510115-30550843		184.534	240.094	-0.379708	34385	Non-regulated	No eCLIP peak	109285	1949	Non-regulated
Zfp39	-1.30083	0.0463641	0.267338	chr11:58888153-58904226		550.384	716.258	-0.380041	12183	Non-regulated	No eCLIP peak	108621	1950	Non-regulated
Rc3h1	-1.30077	0.00711722	0.086243	chr1:160906411-160974976		2267.6	2950.21	-0.379655	57555	Non-regulated	No eCLIP peak	109728	1951	Non-regulated
Fam161b	-1.3004	0.0276884	0.198337	chr12:84345310-84361828		587.218	764.18	-0.380016	13525	Non-regulated	No eCLIP peak	108756	1952	Non-regulated
Mvb12b	-1.30029	0.0103776	0.109068	chr2:33729953-33887946		1614.86	2099.84	-0.378875	152996	Non-regulated	eCLIP Peak	110751	1953	Non-regulated
Sympk	-1.2999	0.00832506	0.0953153	chr7:19024376-19054622		6958.94	9046.2	-0.378444	26125	Non-regulated	No eCLIP peak	110024	1954	Non-regulated
Inhbb	-1.2993	0.0343045	0.224323	chr1:119415463-119423899		722.798	939.348	-0.378066	2529	Non-regulated	No eCLIP peak	111710	1955	Non-regulated
Gad2	-1.29924	0.0522166	0.285999	chr2:22622318-22693877		507.645	659.75	-0.3781	65926	Non-regulated	eCLIP Peak	111344	1956	Non-regulated
Dpysl2	-1.29915	0.0290772	0.203678	chr14:66802068-66911041		4562	5926.71	-0.377565	61305	Non-regulated	No eCLIP peak	110359	1957	Non-regulated
Mib1	-1.29908	0.000456477	0.0167296	chr18:10725625-10818704		5992.6	7785.23	-0.377556	82800	Non-regulated	No eCLIP peak	112597	1958	Non-regulated
Aatk	-1.29902	0.00840837	0.0958516	chr11:120007310-120047167		10251	13317.6	-0.377568	33400	Non-regulated	eCLIP Peak	108372	1959	Non-regulated
Ntn4	-1.29898	0.0428297	0.256129	chr10:93641049-93745972		1703.14	2212.54	-0.377504	102513	Non-regulated	No eCLIP peak	111847	1960	Non-regulated
Smpdl3b	-1.29895	0.0795163	0.366393	chr4:132732966-132757198		129.422	168.381	-0.379641	22281	Non-regulated	No eCLIP peak	109826	1961	Non-regulated
Ago4	-1.29894	0.236077	0.667488	chr4:126489541-126533474		80.4381	104.099	-0.372007	37395	Non-regulated	eCLIP Peak	99136.7	1962	Non-regulated
Prima1	-1.29881	0.0849406	0.380875	chr12:103194458-103242148		602.217	782.035	-0.376952	44334	Non-regulated	eCLIP Peak	111336	1963	Non-regulated
Arhgap24	-1.29881	0.0284463	0.201407	chr5:102481391-102897937		1087.1	1412.39	-0.377662	413201	Non-regulated	No eCLIP peak	112176	1964	Non-regulated
Slc12a8	-1.29872	0.22179	0.647276	chr16:33517328-33664138		44.9211	58.6	-0.383507	143425	Non-regulated	eCLIP Peak	95866.3	1965	Non-regulated
Gab2	-1.29853	0.0775055	0.360825	chr7:97081751-97308951		784.736	1018.71	-0.376469	221193	Non-regulated	eCLIP Peak	110679	1966	Non-regulated
Maco1	-1.29841	0.00969681	0.104642	chr4:134802756-134853346		1293.11	1679.27	-0.376995	46761	Non-regulated	No eCLIP peak	111597	1967	Non-regulated
Slc20a2	-1.29829	0.00205412	0.0413894	chr8:22476700-22569616		2137.31	2775.95	-0.377191	89259	Non-regulated	No eCLIP peak	111627	1968	Non-regulated
Zbtb39	-1.29812	0.0189269	0.157442	chr10:127739530-127747337		815.867	1058.98	-0.376272	1852	Non-regulated	No eCLIP peak	108533	1969	Non-regulated
Lrsam1	-1.29802	0.0560421	0.29849	chr2:32925215-32961641		2348.28	3048.12	-0.376316	32365	Non-regulated	No eCLIP peak	108671	1970	Non-regulated
Nt5dc3	-1.29795	0.045308	0.264327	chr10:86779005-86838389		5645.92	7328.01	-0.376213	53433	Non-regulated	eCLIP Peak	108724	1971	Non-regulated
Mfsd4a	-1.29781	0.241037	0.671939	chr1:132022813-132068064		639.816	830.611	-0.376515	42684	Non-regulated	No eCLIP peak	110963	1972	Non-regulated
Morc2a	-1.29779	0.0481623	0.273665	chr11:3649437-3690477		974.913	1265.79	-0.376694	35631	Non-regulated	No eCLIP peak	111254	1973	Non-regulated
Pcolce2	-1.29763	0.604497	0.905006	chr9:95637627-95698096		245.554	318.73	-0.376296	56058	Non-regulated	No eCLIP peak	108516	1974	Non-regulated
Gnptab	-1.29726	0.0620238	0.316529	chr10:88379132-88447329		947.523	1228.86	-0.375092	62714	Non-regulated	No eCLIP peak	105246	1975	Non-regulated
Zfp382	-1.29724	0.0116764	0.117878	chr7:30121932-30140755		881.844	1144.03	-0.375525	10892	Non-regulated	No eCLIP peak	108619	1976	Non-regulated
Mfsd12	-1.29712	0.0177328	0.151146	chr10:81357490-81366224		1734.2	2249.99	-0.375654	4764	Non-regulated	No eCLIP peak	108545	1977	Non-regulated
Med15	-1.29704	0.0128111	0.124525	chr16:17651208-17722949		2631.4	3413.31	-0.375344	68327	Non-regulated	No eCLIP peak	106558	1978	Non-regulated
C730002L08Rik	-1.29667	0.73486	0.905642	chr19:20534527-20552331		160.361	207.98	-0.37512	117147	Non-regulated	No eCLIP peak	106049	1979	Non-regulated
Pebp4	-1.29632	0.313544	0.750602	chr14:69840406-70059879		47.6051	61.5134	-0.369785	218420	Non-regulated	No eCLIP peak	84234.2	1980	Non-regulated
Acan	-1.29631	0.176157	0.574551	chr7:79053226-79115099		1857.86	2408.58	-0.374541	54262	Non-regulated	eCLIP Peak	104637	1981	Non-regulated
Homer2	-1.29624	0.132945	0.494416	chr7:81600481-81707529		1769.98	2294.52	-0.374454	95980	Non-regulated	eCLIP Peak	104155	1982	Non-regulated
Ptprr	-1.29615	0.384208	0.793776	chr10:116018286-116274930		208.783	270.852	-0.375504	253101	Non-regulated	eCLIP Peak	108601	1983	Non-regulated
Ctr9	-1.2961	0.0293663	0.204588	chr7:111028951-111056377		1642.2	2128.74	-0.374377	23127	Non-regulated	eCLIP Peak	103987	1984	Non-regulated
Git2	-1.29591	0.0449997	0.263338	chr5:114727408-114773495		1256.08	1627.55	-0.373769	41057	Non-regulated	eCLIP Peak	108930	1985	Non-regulated
Jakmip1	-1.29569	0.0495576	0.278558	chr5:37047429-37150614		2722.43	3527.82	-0.373885	72060	Non-regulated	eCLIP Peak	105976	1986	Non-regulated
Nipal3	-1.29529	0.0101134	0.107303	chr4:135445420-135494969		2523.67	3269.53	-0.373561	47131	Non-regulated	No eCLIP peak	108609	1987	Non-regulated
Rabep1	-1.29518	0.0690212	0.337404	chr11:70844761-70943104		4603.52	5962.16	-0.373098	92920	Non-regulated	No eCLIP peak	108686	1988	Non-regulated
Trim33	-1.29484	0.127692	0.482421	chr3:103279293-103358770		1053.91	1364.22	-0.37232	70608	Non-regulated	No eCLIP peak	101647	1989	Non-regulated
Entpd1	-1.29476	0.223314	0.650403	chr19:40611599-40742654		48.4715	62.9097	-0.376145	124989	Non-regulated	eCLIP Peak	109059	1990	Non-regulated
App	-1.29464	0.00316781	0.0534819	chr16:84954437-85173743		87059.7	112711	-0.37255	215915	Non-regulated	No eCLIP peak	105642	1991	Non-regulated
Htra1	-1.29458	0.121389	0.468075	chr7:130936203-130985657		88.324	114.106	-0.369496	47417	Non-regulated	No eCLIP peak	83332.1	1992	Non-regulated
Gm46430	-1.29456	0.0888825	0.392087	chr13:74604421-74617321		313.608	405.914	-0.372212	37475	Non-regulated	No eCLIP peak	101338	1993	Non-regulated
Dmxl2	-1.29432	0.0458674	0.266386	chr9:54365158-54501628		5520.06	7144.67	-0.372182	125855	Non-regulated	No eCLIP peak	100075	1994	Non-regulated
Fhad1	-1.29426	0.303133	0.738101	chr4:141890623-142015084		128.398	165.894	-0.369646	119821	Non-regulated	No eCLIP peak	84501.4	1995	Non-regulated
Disp1	-1.29419	0.361108	0.782275	chr1:183086264-183221529		59.1298	76.5327	-0.372192	130324	Non-regulated	eCLIP Peak	101096	1996	Non-regulated
Pcdh9	-1.29413	0.0682673	0.335358	chr14:93013700-93890679		1348.09	1744.22	-0.371666	870739	Non-regulated	No eCLIP peak	99442.4	1997	Non-regulated
Stat3	-1.29399	0.101951	0.425563	chr11:100885098-100939540		2186.99	2829.91	-0.371805	48265	Non-regulated	eCLIP Peak	99788.7	1998	Non-regulated
Setd7	-1.29391	0.0648392	0.325838	chr3:51515318-51560880		3742.78	4842.69	-0.371701	38150	Non-regulated	No eCLIP peak	99768.3	1999	Non-regulated
[truncated: 9,697 more rows]

## Sheet: Sheet1
Rbm20	Rbm20	Gm10406	Sst	Thyn1
Gm10406	Pla2g4e	Fmn1	Gpx6	Rpl31
Pla2g4e	Dst	Prrc2c	Olfr1348	Tmsb10
Fmn1	Kmt2a	Itprid2	Eps8l1	Cdc42ep2
Dst	Macf1	Golga4	B4galnt3	Nop10
Prrc2c	Meg3	Aldh3b1	Tpr	Aamdc
Kmt2a	Bod1l	Gm3739	Arc	Swi5
Macf1	Akap9	Trank1	Baz2b	Rpl11
Meg3	Pkd1	Plekha7	Zfp605	Slc25a17
Bod1l	Cacng2	4930578G10Rik	C130074G19Rik	Dpy30
Itprid2	Apc	Abhd1	Smg1	Ifitm10
Akap9	Gabra2	Csf1r	St3gal1	Ubl5
Golga4	Nipbl	Gpatch8	Wdfy1	Casp1
Pkd1	Spen	A330074K22Rik	Pcsk9	Rab5if
Aldh3b1	Mycbp2	Sptbn2	Runx1t1	Gmnn
Cacng2	Tenm3	Gypc	Glb1l2	Cstb
Apc	Pclo	Abi3bp	Tmf1	Hax1
Gm3739	Dscam	Zc3h13	Nin	Cystm1
Gabra2	Ank2	Gcc2	Inf2	Glrx
Trank1	Ankrd12	Map7	Zfp106	Pop5
Plekha7	Tnrc6c	Akap12	Rps18-ps4	Psme2
Nipbl	Ank3	B930095G15Rik	Cep350	Serf1
Spen	Grin2b	Sptbn1	Gprc5c	Sub1
Mycbp2	Sptb	Phgdh	Nhlh1	Mrpl13
Tenm3	D430041D05Rik	Arhgap21	Ano2	Ndufa5
4930578G10Rik	Shank2	Aebp1	Plcb1	Fam89b
Pclo	Pdzd2	Hivep1	B230217O12Rik	Lsm6
Abhd1	Bptf	Kat6a	Rfc1	Rer1
Csf1r	Nav2	Elavl3	Nfe2l2	Ppia
Dscam	Amotl1	Hmgn5	Sytl1	Coa4
Ank2	Dot1l	Kmt2e	Cep83	Lcmt2
Ankrd12	Fat3	Atp1a2	Ankrd26	Ost4
Tnrc6c	Ankrd11	Exph5	Plxnd1	Lamtor2
Ank3	Kmt2d	Ptpru	Kalrn	Pnpo
Gpatch8	Bahcc1	Gad1	M5C1000I18Rik	Idi1
A330074K22Rik	Slc4a4	Slk	Cyp2d22	Ly6g6e
Sptbn2	Akap13	Flrt1	Plce1	Cox5a
Grin2b	Plch2	Plxnb2	Ddn	Pdia6
Gypc	Cit	Tmem245	Gadl1	Rnd2
Sptb	Ryr2	Bclaf1	Syne1	Fau
Abi3bp	Erc2	Trf	Jakmip2	Eef1e1
Zc3h13	Atp2b4	Wnt5a	Bbx	Mrps18c
D430041D05Rik	Arid1b	Clip1	Gramd1c	Rpl39
Gcc2	Ppfia2	Upf2	Efcc1	Gm3693
Shank2	Deptor	Mag	Akap5	Atp5mpl
Map7	Sash1	Plp1	Svil	Ndufc1
Pdzd2	Cacna1h	Kcnj9	Shisal1	Ciao2b
Akap12	Traf3	Plekha6	Slc24a2	Rpl36al
Bptf	Myt1l	Wnk1	Cemip	Serf2
Nav2	Tln2	Larp1	Carmil1	Pcbd1
Amotl1	Chd3	Slc10a4	Celsr3	1110017D15Rik
B930095G15Rik	Sh3pxd2a	Mllt6	Ncor1	Psmb10
Dot1l	Prrc2b	Kcna2	Setbp1	Pet100
Sptbn1	Bsn	Smg5	Cacna1c	Snrnp25
Fat3	Elfn2	Ptprs	Esyt1	Creld2
Ankrd11	Igsf9b	Cachd1	Myh10	Atp6v1g1
Kmt2d	Scn8a	Plxna1	Pde7b	Pdia4
Bahcc1	Usf3	Kdm6b	Umodl1	Zbtb8os
Slc4a4	Dab2ip	Cacna1g	Adgrl2	Gstz1
Phgdh	Scube1	Gcnt1	Cep250	Smim26
Arhgap21	Inpp4a	Ppig	Tnrc6a	Usp50
Akap13	Ppp1r9a	Upf3b	Adcy1	Bola3
Aebp1	Tns1	Cchcr1	Tcf20	Timm8b
Hivep1	Dscaml1	Creg2	Tenm1	Tmem91
Plch2	Med13l	Setd5	Capn11	Alkbh6
Kat6a	Asxl2	Ppp1r12a	Rgs6	Rps17
Elavl3	Neurl1b	Rph3a	Mslnl	Atp5e
Cit	Tnrc6b	Slc6a1	A430018G15Rik	Pfdn4
Ryr2	Hivep3	A930033H14Rik	Rrbp1	Ndufa2
Erc2	Sipa1l1	Tceanc2	Enkur	Ostc
Atp2b4	Zfp512b	Adgrl1	Foxj1	Atp5k
Hmgn5	Tet3	Sulf2	Ccdc88a	Manf
Kmt2e	Cacna1b	Prpf4b	Gm28455	Rpl35a
Atp1a2	Ank1	Brpf1	Nfatc1	Rpl38
Arid1b	Fbf1	Zfp646	Sh3rf3	Atp5j2
Ppfia2	Zmiz1	Dync1h1	Olfr1347	Txndc12
Exph5	Filip1	Synpo2l	Wdhd1	Mcee
Deptor	Wwc1	Map1a	Fat4	Xbp1
Sash1	Ncoa7	Klf13	Sez6l	Cops9
Ptpru	Unc13a	Srrm1	Grin2a	Lsm5
Cacna1h	Cacna1a	Atf7ip	Ash1l	Atp5l
Gad1	Mbd5	Bcl9l	Plec	Tomm7
Slk	Ncor2	Panx2	Myo5b	Prok2
Flrt1	Cacng4	Bmf	Specc1l	Sec61g
Traf3	Ksr1	Mecp2	Cnga2	Med30
Plxnb2	Eif4g3	Psd2	Slc38a6	Rexo2
Tmem245	Kcnb1	Rnf169	Angpt1	Aldh3b3
Myt1l	Tshz2	Sgcg	Stoml3	Smpx
Tln2	Zfp827	Gm5124	Rbfox3	Nup37
Chd3	Pakap		Coq8a	Rab42
Sh3pxd2a	Fam193a		Wscd2	Apoa2
Prrc2b	Trio		Cnga4	Lsmem1
Bsn	Kcnh5		4932438A13Rik	Alad
Elfn2	Tnik		Ep300	Rgcc
Igsf9b	Epb41l1		Togaram2	Nmb
Scn8a	Nhsl2		Tcof1	Gm10432
Usf3	Slc8a1		Tspoap1	Rps28
Bclaf1	Sobp		Cttnbp2	Brca1
Trf	Ppfia1		Pcnt	Coq2
Wnt5a	Ncam1		Zfp407	Rpl3
Dab2ip	Ddx46		Epas1	Crem
Clip1	Myo18a		Slc24a4	Gng5
Upf2	Tenm4		Limch1	Cox7a1
Scube1	Kmt2b		Bmp7	Rom1
Mag	Stat2		Nos1ap	L3hypdh
Inpp4a	Crtc3		6530402F18Rik	Gpr75
Ppp1r9a	Chd5		Ttc22	Net1
Tns1	Tiam1		Bicd2	9130008F23Rik
Dscaml1	Auts2		Hs6st2	Gm33045
Med13l	Rai1		Tet1	Piga
Asxl2	Cdc42bpb		Gm10451	Sfxn4
Neurl1b	Tbc1d16		Zeb2	Hddc2
Plp1	Prdm2		Csmd2	Klhl4
Tnrc6b	Zfpm1		Tecpr2	Sdf2l1
Hivep3	Tanc2		Dcc	Hdhd3
Kcnj9	Cmip		Plxna4	Neil1
Sipa1l1	Tanc1		Mobp	D830030K20Rik
Plekha6	Zcchc14		Ubn2	Gpr4
Zfp512b	Arhgap26		Kremen1	B2m
Tet3	Septin9		Arid4a	Cytip
Wnk1	Odf2		Unc80	Rnf122
Larp1	Srcin1		Rfx3	Adat2
Cacna1b	Ppp1r16b		Nav3	Fbln7
Ank1	Slc6a11		Fetub	Tpm2
Fbf1	Syne2		Wrn	3300002P13Rik
Slc10a4	Jag2		Grm5	Lncbate10
Mllt6	Celf4		Kcnh1	Ccl17
Kcna2	Pkp4		Xylt1	Ust
Zmiz1	Aff3		Zfp704	Zc3h12d
Smg5			Pde1c	Rec114
Filip1			Etl4	Tepp
Wwc1			Fam117a	Gm39307
Ncoa7			Hip1	Gm35722
Unc13a			Mcf2l
Cacna1a			Ptprt
Mbd5			Yeats2
Ptprs			Ebf2
Cachd1			Mgam
Plxna1			Kif1c
Ncor2			Eea1
Kdm6b			Smad3
Cacng4			Shank3
Ksr1			Kif5a
Cacna1g			Myo6
Gcnt1			Pdgfrb
Ppig			Tsc1
Eif4g3			Myo5a
Kcnb1			Upf1
Tshz2			Ksr2
Zfp827			Akap6
Upf3b			Ltbp4
Cchcr1			Nhs
Pakap			Prex1
Creg2			Med12l
Fam193a			Trpc5
Trio			Uty
Kcnh5			Sacs
Setd5			Chd6
Tnik			Gse1
Epb41l1			Mical3
Ppp1r12a			Ntng2
Rph3a			Chd9
Slc6a1			Golm1
Nhsl2			Gfy
Slc8a1			Cd2ap
Sobp			Sfi1
A930033H14Rik			Kdm5d
Ppfia1			Phf3
Ncam1			Scarf2
Ddx46			Cdkal1
Tceanc2			Cdc42bpa
Adgrl1			Dysf
Myo18a			Ebf4
Tenm4			Tyrobp
Kmt2b			Camk1d
Stat2			Map9
Sulf2			Rsf1
Prpf4b			Anxa3
Crtc3			Tnr
Chd5			Lima1
Tiam1			Kif26a
Brpf1			Prr14l
Zfp646			Frmpd3
Auts2			Kif13a
Rai1			Cacna1e
Cdc42bpb			Ell3
Tbc1d16			Phf21a
Dync1h1			Map3k1
Prdm2			Arid4b
Zfpm1			Arhgef28
Synpo2l			Chd4
Tanc2			Ncoa6
Cmip			Wipf1
Tanc1			Ttc28
Map1a			Zfp236
Zcchc14			Ptprd
Klf13			Trarg1
Srrm1			Drd2
Atf7ip			Lrrc7
Arhgap26			Eml5
Septin9			Fan1
Bcl9l			Slit3
Odf2			Apcdd1
Panx2			Epha4
Srcin1			Pcdh15
Bmf			Zfyve26
Mecp2			Xkr7
Psd2			Cep295
Ppp1r16b			Zfp811
Rnf169			Sult1d1
Sgcg			Lekr1
Slc6a11			Rab3d
Syne2			Zfp114
Gm5124			Tac1
Jag2			Nav1
Celf4			Gm15510
Pkp4			Unc5d
Aff3			Abca1
			Sox5
			BC049352
			Foxp1
			Zfp292
			Pan3
			Lrp8
			Ttc3
			Carns1
			Tfrc
			Celf5
			Lhx1
			Nemf
			Pnisr
			Casp8ap2
			Lrp1
			C2cd3
			Trrap
			Fstl4
			Tcf4
			Herc1
			Zfp462
			Arfgef3
			Dnajb13
			Apc2
			Plxna2
			Nktr
			Gria3
			Plcb4
			Robo2
			Plcb3
			Nfix
			Stom
			Phactr1
			E130008D07Rik
			Uncx
			Gas7
			Agap2
			Huwe1
			Jcad
			Ece1
			Inpp5d
			Ctnna1
			Scn3a
			Esf1
			Nrp2
			4933427D14Rik
			Pbrm1
			Myh9
			Kat6b
			Nexmif
			Sec14l5
			Igsf3
			Hipk2
			Sfswap
			Nefh
			Tshz1
			Bdp1
			Gan
			Tmem131
			Zfp408
			Galnt10
			Rapgef1
			Camk4
			Epb41l4b
			Pggt1b
			Ephb2
			Crcp
			Klk1b22
			Nbeal2
			Olfr281
			Peg10
			Slc1a2
			Optc
			Alk
			Slc1a3
			Pnmt
			Evpl
			Erich3
			Zfp69
			Dock9
			Cd74
			Dcdc2a
			Myo10
			Cacna1d
			Scaper
			Usp36
			Caskin2
			Gapdh
			Casp6
			Egr1
			Map1b
			Chrm3
			Cplx2
			Mast4
			Numa1
			Lcorl
			Tnrc18
			Fat1
			Tut7
			Secisbp2l
			Mrtfb
			Gpnmb
			Zfp638
			Mtus2
			Usp54
			Nfasc
			Setx
			Clasp1
			Stac2
			Sphkap
			Carmil3
			Lrrc75a
			Dnmt3a
			Wipi1
			Nol8
			Vps13c
			Ccar1
			Pde4dip
			Gm36608
			Hdc
			Ktn1
			Rorb
			Pcyt1b
			Cdh4
			Zfp217
			Jmjd1c
			Rbm41
			Lifr
			Slx4
			Ptgis
			Ice1
			Lrp1b
			Rock2
			Sptan1
			Ccdc39
			Csgalnact1
			Gm15270
			Dlx1
			Stx2
			G530011O06Rik
			Gnal
			Ccdc66
			Trerf1
			Chl1
			Gabbr2
			L1cam
			Adamts2
			Wdfy3
			Kif26b
			Nfatc3
			Zfp618
			Kif21b
			Setd2
			Birc6
			Smarca4
			Kcnj10
			Jakmip3
			Camk2a
			Mdc1
			Agap1
			Scaf11
			Stbd1
			Dcn
			Slc32a1
			Bicra
			Mapkbp1
			Jarid2
			Igf2r
			Nsd1
			Sgcd
			Golga3
			Ttc17
			Lamc1
			Sorcs2
			Enpp3
			Zfp609
			E130102H24Rik
			Trhr2
			Itsn2
			Pdlim1
			Cep164
			Mapk4
			Arid1a
			Camta1
			Cc2d2a
			Brd3
			Grip1
			Zfp335
			Zzef1
			Snapc4
			Rin1
			Stxbp4
			Xpnpep3
			Scube2
			Zfp608
			Mlxip
			Cdh23
			Fnbp4
			Ehbp1
			Arhgap20
			Robo1
			Fstl1
			Lrrc75b
			Crhr1
			Vps13d
			Chaf1a
			Map2
			Thoc2
			Tmem178b
			Slc16a2
			9330159F19Rik
			Bbs1
			Speg
			Erc1
			Cgnl1
			Atp11a
			Zc3h18
			Cyp2a5
			Frmpd1
			Pcm1
			6820431F20Rik
			Crispld2
			Cntn2
			Ripor3
			Lrrc9
			Syt7
			Zkscan2
			Itsn1
			Cux2
			Dicer1
			Srcap
			Gpam
			Kif5b
			Aspdh
			Caskin1
			Kcnma1
			Fkbp15
			Mprip
			Wasf2
			Uckl1os
			Itpr1
			Srrm2
			Rb1cc1
			Baz1b
			1700112J16Rik
			Leng8
			Bmp2
			Ar
			Slc4a8
			Vldlr
			Sdc4
			Plekho2
			9930021J03Rik
			Cnksr2
			Soga1
			Xkr4
			Epha5
			Arhgef12
			Gigyf1
			Lingo2
			Dgkh
			Zc3h7b
			Pcnx2
			Dlg5
			Tcerg1
			Smg6
			Scn2a
			Csf1
			Kcnh3
			Ep400
			2610005L07Rik
			Prdm15
			Diaph2
			Btbd8
			Lrch3
			Nxpe4
			Mal
			Sclt1
			Cfap99
			Rnf168
			Ttbk2
			Ankhd1
			Mrc2
			Cdk12
			Dlgap1
			Dido1
			Cdh6
			Lyst
			Syngap1
			Crybg3
			Dclk3
			Lrrcc1
			Grip2
			Trim17
			Hspa12a
			Mlh3
			Scg5
			Tub
			Ildr2
			Alms1
			Pde10a
			Epb41l3
			Srgap1
			Frg2f1
			Mavs
			Prrc2a
			Afdn
			Kifc2
			Spata13
			Igf2
			Tspo
			Ncoa1
			Mn1
			Gucy1a1
			Wdr76
			Adgrl3
			Gm15559
			Lmtk2
			Pcdh19
			Taok3
			Nfic
			Myo7a
			Myt1
			Zfp142
			Plvap
			Vps13b
			Rad54l2
			Kif21a
			Gm2237
			Lrrn4cl
			Ugt8a
			Lama4
			Supt16
			Atxn1
			Phldb1
			Kansl3
			Ccdc80
			Osbpl3
			Mthfr
			Heg1
			Dio2
			Syn3
			Daam1
			Cd82
			Tshz3
			Slf2
			Gm8615
			Doc2b
			Cplane1
			Gja1
			Ttf1
			Eif2ak4
			Ppp1r12b
			Cdc42bpg
			Sbno1
			Tmem94
			Foxo6
			Tmod1
			Klhl33
			Foxk1
			Boc
			U2surp
			Csmd1
			Ptpn6
			Fam168a
			Smc1a
			Mtcl1
			Cast
			Armcx4
			Prpf40a
			Sparc
			Nrap
			Sez6
			Rin2
			Cdk13
			Mgat5
			Nolc1
			Rbm28
			Lpin1
			Chd8
			Ino80
			Magi2
			Dtx3l
			Bcor
			Taok2
			Ddx3y
			Ift74
			Cc2d1b
			Zfp612
			Smc6
			Ddx23
			Csrnp2
			Rnf150
			Scn4b
			Nbn
			Nyap2
			Ptprf
			Wwc2
			Sorl1
			Insr
			Tap1
			Dzip1l
			Synm
			Atp2b1
			Epb41l2
			Meis2
			Dnajc13
			Usp42
			Npat
			Col23a1
			Iqsec3
			Vav2
			Hpcal4
			Celsr2
			Taok1
			Eif3a
			Uhrf1bp1
			Lmln
			Limd1
			Tnip2
			Rcor1
			Gsn
			Zfp970
			Dennd2a
			Spc24
			Prdm11
			Sparcl1
			Gon4l
			Klf12
			Zfp458
			Ino80d
			Frmd4b
			Dync2h1
			Igf1r
			Phf21b
			Adarb1
			Npas2
			Zbtb46
			Sorcs1
			Hip1r
			Mast3
			Ebf3
			Hr
			Kcnq3
			Erbb2
			Crebbp
			Atrn
			Thsd7a
			Gpd1
			Flrt3
			Adam22
			Phactr2
			Gpatch1
			Tox3
			Hivep2
			Nol4l
			Zbtb7a
			Grik2
			Dusp10
			Arhgap22
			Tmem132b
			Mchr1
			Nrxn1
			Apbb2
			Tecpr1
			Kcnk9
			Ptcd1
			Rftn1
			Ngfr
			Sstr1
			Zfp971
			Magi3
			Unc13b
			Blm
			Dgkg
			Rbm25
			Ncam2
			Poc1b
			Slit1
			Emsy
			Rptor
			Cbfa2t3
			Ankrd35
			Otud3
			Lrrc45
			Gm14322
			Cdk18
			Srrm3
			Sprr1a
			Ptpn3
			Per2
			Stox2
			Eprs
			Foxn3
			Triobp
			Frmd4a
			Abcc8
			Grm4
			Grid2ip
			Cdk15
			Ubr4
			C920021L13Rik
			Kif5c
			Kdm3b
			Maml3
			Tpd52l1
			Zfp521
			Ralgds
			Ylpm1
			Mmp11
			Galnt16
			Amotl2
			Pcnx
			Tex15
			Herc2
			Adar
			Soga3
			Wnk2
			Map3k20
			Naa15
			Ccdc63
			Ccdc157
			Acsbg1
			Rasgrp3
			Glg1
			Igdcc4
			Dynlrb2
			Nrxn3
			Mast1
			Mia3
			D130043K22Rik
			Ino80dos
			Rell1
			Srrm4
			Zfpm2
			Nek1
			Srgap3
			Snx29
			Zfp318
			Zmynd8
			Tyro3
			Sorbs2
			Mapk8ip3
			Nfat5
			Ebf1
			Anxa2
			Il4ra
			Tbc1d5
			Abl1
			Rimbp2
			Acadl
			Cd3eap
			Trim66
			Tab1
			Pacs2
			Rara
			Cabin1
			Peg3
			Mpdz
			Trib3
			Kif1b
			Kcnd3
			Arrdc2
			Unc79
			4931415C17Rik
			Hecw1
			Ltbr
			Fam189a2
			Brd4
			Serinc5
			Fgd3
			Gm16894
			Plxnc1
			Serpina3n
			Atm
			Itpka
			Etv6
			Cep95
			Ctdsp1
			Nf1
			Mmp16
			Cage1
			Tmtc1
			Ago1
			Asxl1
			Hps1
			Ankrd6
			Sema5b
			Camsap1
			Ctnnd2
			Ankrd17
			Baz2a
			Pitpnm2
			Fhod3
			Dennd5b
			Acvr2b
			Mfhas1
			Tom1l1
			Abca3
			Smarcc2
			Add2
			Ptprm
			Mphosph9
			Hook1
			Arnt2
			Cdan1
			Wdr81
			Lamb1
			Tut4
			Farp1
			Scaf4
			Krba1
			Sema4d
			Mdga1
			Arid2
			Gm14325
			Gadd45g
			Tmem81
			Frmpd4
			Cdk6
			Cacna2d2
			Mical2
			Jph3
			Itga3
			Zfp937
			Zfp658
			Ncapd2
			Pik3c2b
			Mink1
			Nup155
			Camkk1
			Slc9a9
			Rgs14
			Supt6
			Exoc4
			Wipf3
			Eef2k
			Plpp3
			Adam19
			Iqce
			Gpr161
			Mlc1
			Bcorl1
			Tyk2
			Ppm1e
			Gpc1
			Mast2
			Acsm4
			Aff4
			Dlgap3
			Kank1
			Fry
			Foxn2
			Dzip1
			Pllp
			Cntn3
			Gucy2g
			Fam155a
			Plcd3
			Slc16a10
			Sltm
			Larp4b
			Crocc
			Lrp6
			Ubr5
			Dock3
			Ncmap
			Taf3
			Utrn
			Ncl
			Zfp738
			Car15
			Ncoa2
			Phf20
			Bcl7a
			Brpf3
			Shisa7
			Rims1
			Prkg2
			Scn1a
			Kri1
			Glp1r
			Gcn1
			Luzp1
			Ptpro
			Efna5
			Diaph1
			Ski
			Mysm1
			Nr3c2
			Sema4b
			Dab1
			Klf7
			Pard3
			Hectd4
			Chrm1
			Cep170
			Sptbn4
			Rarg
			Egr4
			Kcnip3
			Trim67
			Kif1a
			Arhgap33
			Kcng1
			Zfp809
			Plagl1
			Stc2
			Dlgap2
			Rassf1
			Usp34
			Fam81b
			Rapgef2
			Hcfc1
			Sipa1l3
			Ubash3b
			Ypel2
			Ehd4
			Synj2
			Mzf1
			Kndc1
			Cyp26b1
			Clip2
			Rere
			Jph4
			Tbc1d8
			Pikfyve
			Fam83h
			Pibf1
			Rexo1
			Ccnd1
			Rasal2
			Dok3
			Ppargc1b
			Evi5l
			Ahdc1
			Dcx
			C130046K22Rik
			Ndst1
			Smg7
			Cygb
			Utp20
			Map3k11
			Mgat5b
			Srp54b
			Rtp1
			Otop3
			Trp73
			Arhgef40
			Megf8
			Card10
			Pitpnm3
			C1qb
			Zfp423
			Pds5a
			Supt20
			Pde11a
			Dclre1a
			Aph1b
			Hook3
			Magi1
			Taf1
			Wdr19
			Fryl
			Nr4a1
			Myo9a
			Rhobtb1
			Arhgap32
			Slc7a14
			Ptprg
			Nr2f2
			Gabrb1
			Plcg1
			Gripap1
			Extl1
			Hcn4
			Dcaf17
			Larp7
			R3hdm2
			Map4k4
			Eif4g1
			Phf2
			Hepacam
			Iqsec1
			2700049A03Rik
			Resf1
			Pdzrn4
			Ncapd3
			Fam184a
			Kcnk3
			Nrgn
			Acaca
			Unc5a
			Ttf2
			Castor2
			Itga7
			Ssh2
			A730036I17Rik
			9930104L06Rik
			Tchp
			Ercc5
			Crtc1
			Cspp1
			Mbp
			Prkab2
			Ccdc148
			Sfrp2
			Phactr3
			Adcy3
			2410004P03Rik
			Iqsec2
			Sbf2
			Metap1d
			Nxph3
			Ccdc33
			Aff1
			Smc3
			Cul9
			Jph1
			Slc37a1
			Bicdl1
			Aqp4
			Zmynd11
			Polr1a
			Incenp
			Hdac4
			Ptprj
			Taf4
			Zfp334
			Rbfox1
			Exd1
			Ky
			Elovl6
			Golga2
			Zc3h12c
			Matn2
			Mta3
			Rab11fip3
			Ankrd44
			Pop4
			Whamm
			1700025G04Rik
			Myrip
			Hmbox1
			Sncaip
			Rffl
			Prkca
			Ccnj
			Hnrnpu
			Pcdh1
			Nsrp1
			Nrip1
			Ciz1
			Ptk2b
			Ercc6
			Abca2
			Zc3h7a
			Mbd6
			Ikzf4
			Gm11992
			Atp2b2
			Zfp629
			Insyn2a
			Gtf3c1
			Gm3764
			Cacna2d4
			Afap1
			Kcna1
			Mutyh
			Rabep2
			Arhgef11
			Dnm2
			Bcl11b
			Eno4
			Lrp8os2
			Pfkfb4
			Dagla
			Shank1
			Cacna1i
			Pfas
			Eps8
			Tnk2
			Phtf2
			Eif2s3y
			5830417I10Rik
			Sec14l2
			Fmnl1
			Rgs9
			Dctn1
			Raph1
			Serpina3m
			Rdx
			Gria2
			Lrrc8b
			Tro
			Trim25
			Abcg1
			Ranbp10
			Fut9
			Mfap1a
			Grik4
			Camsap2
			Amot
			Tpcn1
			Sla
			Catsper2
			Ppp2r3a
			Zfp267
			Kcnc3
			Ralgapa2
			Pcsk5
			Amer1
			Gatad2b
			Emid1
			Tbc1d10c
			Adgra1
			Cobl
			Sh3d19
			Acin1
			Nacc2
			Scg3
			Dixdc1
			Ina
			Cux1
			Colq
			Igfbp4
			Cic
			Gramd1b
			Ajap1
			Pacsin1
			Cdh20
			Mtss2
			Adcy9
			Plat
			Epcam
			Prpf38b
			1810055G02Rik
			Pxn
			Mgll
			Agl
			Adcyap1r1
			Rgma
			Ckap5
			Cep131
			Fbxo32
			Ptpn11
			Tnks1bp1
			Ikbkb
			Erbin
			Phc1
			Ahr
			Zfp184
			Sgsm2
			Arfgef2
			Man2a2
			Nos1
			Mrtfa
			Tonsl
			Jmy
			Efemp1
			Hirip3
			Caln1
			Zfp523
			Cntnap5a
			Kcnk12
			Chrna1os
			Sin3a
			Rbm19
			Rbpms2
			Pparg
			0610030E20Rik
			Hlcs
			Swt1
			Smpd4
			Prag1
			Adcy6
			Ptpdc1
			Rasgrf2
			Zhx3
			Chd1
			Ttc7
			Dip2b
			Zfp91
			Polr2a
			Plekhg5
			Vgll2
			Snapc1
			Marveld1
			Depdc5
			Setd1b
			Dop1b
			Mdga2
			Elfn1
			Ccdc186
			Garem1
			Anks1
			Pdk1
			Osbpl6
			Ankle2
			Samd4b
			Tjp1
			Ccp110
			Ighmbp2
			Fgf11
			Gpr158
			Cpne5
			Slc16a6
			Nppa
			Cdk11b
			Dgkz
			Furin
			Ranbp2
			Rgs12
			Adgrb2
			Adgrg1
			Med13
			Ccdc112
			Cd276
			Fmnl2
			Grm1
			Zdbf2
			Clock
			Ano3
			Clasrp
			Arrb1
			Fbxw7
			Ankrd52
			Camk1g
			Osbpl5
			Fmod
			Tspan10
			Ephb3
			Ablim3
			Fbxo41
			Mapt
			Kif16b
			Trip12
			Kcnq2
			Phc3
			Sel1l3
			Ccdc17
			Ttll5
			Tacc2
			Cpeb2
			Nedd4
			Zzz3
			Zfp503
			Htt
			AA465934
			Atp11c
			Marchf4
			Sp1
			Nrg2
			Adcy5
			Tfap2d
			Odr4
			Washc2
			Gna12
			Slc35d1
			Shc2
			Dis3
			Gh
			Qk
			Mfsd6
			Gm14267
			Usp24
			Ppard
			Fnbp1
			Txlna
			Klhl38
			Ncan
			Slc9a7
			Esco1
			Rapgef6
			Gramd4
			Eps15l1
			Sort1
			Khsrp
			Nefm
			Tor1b
			Pik3cd
			Reep3
			Gm2164
			Map3k5
			Tle2
			Slc45a4
			Tnip1
			Fam163b
			Hykk
			Lmo7
			Syndig1l
			Nsd2
			Pdzd8
			Fam120a
			Pds5b
			Slc22a23
			Arhgap23
			Vangl2
			Ccdc9b
			Atxn2l
			Lpcat3
			Nphp4
			Atp2b3
			Sdc1
			Eml1
			Cep126
			Bcl9
			Dzip3
			Mark1
			Ppp4r1l-ps
			Tmem74bos
			Rasgrp4
			Nr2c2
			Grk3
			Ppfibp2
			Antxr1
			Hdlbp
			Minar1
			Optn
			Otud7b
			Lmtk3
			Nrcam
			Lrrc20
			Tbc1d2b
			Zc3h4
			Ubr2
			Rgp1
			Man1c1
			Igfbp5
			Klhl18
			Abcd2
			Meak7
			Nfrkb
			Pak3
			Chadl
			Sstr3
			Otud7a
			Dip2c
			Zfas1
			Cul7
			1700013F07Rik
			Arl14epl
			Brinp2
			Zfp354b
			N6amt1
			Sorcs3
			Zscan18
			Ascc2
			Simc1
			R3hdm1
			Carf
			Heatr6
			Evi5
			Wbp1l
			Oasl2
			Nbas
			Stat5a
			Dmrtb1
			Zfp40
			Phlpp2
			5031439G07Rik
			Usp48
			Tmem151b
			Tpbg
			Msh3
			Gfod1
			Adgrb1
			Grid1
			Klhl3
			Gm6277
			Olfm2
			Ptprk
			Dnm3
			Eml6
			Vwa5b2
			Senp1
			Tst
			Epg5
			Nuak2
			Pik3c2a
			Pgm2l1
			Atxn7l1
			Pip5k1c
			Fam193b
			Pml
			5033417F24Rik
			Mxd1
			Gfap
			Ints2
			Rnasel
			Reln
			Dhrs3
			Rnf157
			Sorbs1
			Dhx34
			Nbea
			Neurod2
			Pik3ca
			Abl2
			Shisa6
			Rgs16
			Mamld1
			Ccdc93
			Kcnq1
			Dhx8
			Nup214
			Map7d2
			Grin2c
			Ube2o
			Slc43a2
			Ralgps2
			Ctif
			Rbbp8
			Ifnar1
			Wdr90
			Chd1l
			Rsrc2
			Cers6
			Osbp2
			Zfp74
			Prpf40b
			Arhgef17
			Cadps2
			Slc26a11
			Nedd4l
			Pou6f1
			Ubtf
			D5Ertd579e
			Zfp862-ps
			Rnf40
			Rbm6
			Otud4
			Plekhm2
			Dock4
			Slc38a3
			Calhm2
			Atxn2
			Cdh22
			Rd3
			4933421O10Rik
			Pygm
			Prr12
			Opa1
			Inppl1
			Nynrin
			Map7d1
			Rrp1b
			Zfp644
			Card11
			Ttll7
			Tcaf1
			Mtss1
			Hnrnpul1
			Abcc1
			A430033K04Rik
			Dpysl5
			Pip4k2b
			Helb
			Brd1
			Myo1b
			Lzts1
			Epb41l4a
			Klhl29
			Prkcg
			Rnf20
			Sema5a
			Wapl
			Rnf144a
			1700028P14Rik
			Mllt3
			Kazn
			Gnaz
			Slc30a10
			Gigyf2
			Knop1
			Ccdc92b
			Pdxdc1
			Gfpt2
			Gcc1
			Ttbk1
			Map3k9
			Unc5b
			Kcnj6
			Bmpr1b
			Zfp804a
			Aqp5
			Ophn1
			Asap1
			Ppp6r2
			Tmtc2
			Pcp4l1
			Ppfia3
			Smarcc1
			Dtx4
			Timeless
			Gemin5
			Kansl1l
			Lpin2
			Jade3
			Proser1
			Arhgap35
			Klhdc4
			Dnmt1
			Rufy2
			Rbm27
			Foxo4
			Nectin1
			Rtf1
			Znrf3
			Abcd4
			Il15
			B230354K17Rik
			Mllt1
			Gtf2i
			Trp53bp2
			Fnbp1l
			Tcf19
			Etnk2
			Snhg1
			Mpp7
			Ano8
			Ralbp1
			Btbd7
			Tbl1x
			Pbx1
			Trak2
			Ric1
			Psip1
			Satb1
			Pcnx3
			Shtn1
			Rflna
			Vps54
			Gm5820
			Scd1
			Usp2
			Tulp4
			Akap8
			Pou3f3
			Zfp710
			Atg2b
			Prkce
			Lrrc4b
			Ptpn21
			Ankrd33b
			Rasal1
			Zfp316
			Kcnab3
			Kbtbd11
			Dip2a
			Tmem182
			Prph
			Col20a1
			Gpc4
			Lig3
			Gm6712
			Zfp28
			Doc2g
			Endov
			Gprin1
			Krt9
			Ubn1
			Wls
			Brd2
			Sema6d
			Gtf2ird2
			Fam13a
			Mical1
			Gm7072
			Phrf1
			Gm20482
			Rapgef4
			Ptbp1
			Prkdc
			Gm9899
			Slc12a4
			Epb41
			Cnot3
			Pan2
			Kif3b
			Pnn
			Eno1b
			Plekha5
			6430548M08Rik
			Zfp169
			Slc27a3
			Tulp3
			Kidins220
			Snph
			Aldh4a1
			Spag9
			Nrp1
			Sos1
			Ppp2r2c
			Rora
			Rfx1
			Ntm
			Hmgxb4
			Chml
			Zfp362
			Acap2
			Synpo
			Abca5
			Ntrk2
			Usp29
			Tbc1d4
			Fcho1
			Cdh2
			Rint1
			Cep120
			Thrb
			Tle3
			Sema6a
			Mras
			Zc3h6
			Med12
			Mau2
			Ephb1
			Zfp652
			Grb10
			Rps6ka4
			Scamp2
			Rpap1
			Nr2f1
			Rnf112
			Fbxl18
			Sema3f
			Cblb
			Sap130
			Bicral
			Heatr5b
			Cldn11
			5930430L01Rik
			Gtf2ird1
			Ptgfrn
			Tbc1d9b
			Psmb8
			Cdk8
			Sh3pxd2b
			Arhgef6
			Septin11
			Marf1
			Bmp2k
			Basp1
			Mns1
			Kansl1
			Dbn1
			Rabgap1
			Ppp1r37
			Astn1
			Thrap3
			Zeb1
			Maml1
			Pak4
			Taf1a
			Zfp433
			Zfp592
			Bcr
			Hp1bp3
			Nmnat2
			Gm13205
			1700017B05Rik
			Lin54
			Pfkfb3
			Rgs3
			Gpr153
			Ift81
			Sdc3
			Neto1
			Klhl40
			Rab3il1
			Gm10575
			Fgf1
			4933412E12Rik
			Micall1
			Osbpl10
			Samd4
			Cpne8
			Slmap
			Fnip2
			Rgl2
			Atp8a2
			Ssh1
			Prdm10
			Mon2
			Ctcf
			Sec16a
			Nup210
			Nbr1
			Pcdh17
			Evc2
			Sfxn5
			Rassf4
			Ankfy1
			Safb2
			Trak1
			Hectd1
			Atp8b2
			Opa3
			Gabrd
			Gm14410
			Sh3bp1
			Gtf2a1
			Zfp729a
			Tns2
			Pdrg1
			Szt2
			Mob3c
			AU040320
			Top1
			Gprc5b
			Lamc2
			Tmem44
			Zfp39
			Rc3h1
			Fam161b
			Mvb12b
			Sympk
			Inhbb
			Gad2
			Dpysl2
			Mib1
			Aatk
			Ntn4
			Smpdl3b
			Ago4
			Prima1
			Arhgap24
			Slc12a8
			Gab2
			Maco1
			Slc20a2
			Zbtb39
			Lrsam1
			Nt5dc3
			Mfsd4a
			Morc2a
			Pcolce2
			Gnptab
			Zfp382
			Mfsd12
			Med15
			C730002L08Rik
			Pebp4
			Acan
			Homer2
			Ptprr
			Ctr9
			Git2
			Jakmip1
			Nipal3
			Rabep1
			Trim33
			Entpd1
			App
			Htra1
			Gm46430
			Dmxl2
			Fhad1
			Disp1
			Pcdh9
			Stat3
			Setd7
			Mtx3
			Bmpr2
			Shroom3
			Adamts17
			Zfp651
			Pag1
			Serpine2
			Rasa4
			Dpp6
			Sprn
			Bbs4
			Vdr
			Slc9a1
			Spef1
			Cep170b
			Kcnh7
			Dgki
			Glb1l
			Tmem104
			Tsc22d2
			Cald1
			Ube4b
			Trim2
			Dnajc2
			Gm12371
			Rasa3
			Lars2
			Osbpl8
			Arid5b
			Foxk2
			Arhgap5
			Ascc3
			Nup98
			Sel1l
			Igdcc3
			Celf3
			Cstad
			Tbck
			Cdh12
			Disp2
			Dhx38
			Sh3kbp1
			Slc7a5
			Amer3
			Tlk2
			Arhgef18
			Srsf4
			Denn2b
			Smarca1
			B3galt5
			Tnpo2
			Itga9
			Efr3b
			Map3k3
			Dop1a
			Bend7
			Celf6
			Ndrg1
			Cad
			Src
			St6galnac5
			Zfp532
			Srgap2
			Zdhhc22
			Srek1
			Klf10
			Smpd3
			Hspa4
			Cebpz
			Gfra2
			Kif2a
			Trim65
			Dnajb12
			Fam107a
			Laptm5
			Ncoa3
			Exosc10
			Hnrnpul2
			Plppr4
			Mre11a
			Scaf8
			Prrt2
			Dnmbp
			Lemd2
			Wdr70
			Fbxl16
			Uhrf1bp1l
			Gprin2
			Zfp697
			Trim62
			Synj1
			Traf3ip1
			Dvl3
			Setd1a
			Letm2
			Zfp866
			Cpne9
			Cfap206
			Lnx1
			Tab2
			Helz
			Phactr4
			Lmcd1
			Tafa3
			Zfp935
			Ppp6r3
			Akap17b
			Rrp12
			Tbc1d1
			Pawr
			Ybx3
			Clstn2
			Cdkl5
			Bcl7c
			Rbm26
			H2bc4
			Zscan20
			Flt3
			Sall1
			Map6
			Osbpl7
			Shh
			St6gal1
			Ppargc1a
			Tmem69
			Unk
			Chgb
			Pik3r2
			Plekhb1
			Zfp64
			Ccser2
			Smg9
			Zfc3h1
			Cttnbp2nl
			Prss23
			Slc12a6
			Kcnc1
			Znfx1
			Gm3055
			Gucy1a2
			Tnks
			Gdf11
			Adam11
			Ccdc149
			Vps39
			Chrna4
			Zfp516
			Tcerg1l
			Fam160b1
			Bcam
			Neurl1a
			Myo16
			Smurf1
			Rif1
			Npr2
			Sp4
			Usp8
			Ehmt1
			Capn2
			Ccdc65
			Dpysl3
			Cep89
			Sos2
			Kctd16
			Stxbp5
			Slc8a2
			Orai2
			Arhgap39
			Phlpp1
			Tppp
			Cntnap1
			Necab3
			Plxdc2
			Tcf3
			Actn4
			D030028A08Rik
			Cep104
			Dmtf1
			Hrh2
			Inka2
			Dnajb5
			Zfp777
			Xylb
			Rubcn
			Vps37b
			Eef1aknmt
			2610507B11Rik
			Prkab1
			Strbp
			Cacng8
			Cc2d1a
			Psd3
			Mkx
			Brwd1
			Wiz
			Lynx1
			Rap1gap
			Spock2
			Coro2b
			Rnft2
			Zfp445
			Plaat3
			Vps33a
			Rfx7
			Gm13830
			Zscan26
			B3gntl1
			Zbtb34
			Dlgap4
			Coro6
			Rusc2
			Dtx1
			Rbms1
			Khnyn
			Suco
			Dennd11
			Marcks
			Pus7
			Luc7l3
[truncated: 9,345 more rows]
